# Supplementary material for: Integrating single-nucleus sequence profiling to reveal the transcriptional dynamics of Alzheimer’s disease, Parkinson’s disease, and multiple sclerosis
Source: J Transl Med. 2023 Sep 21;21:649. doi: 10.1186/s12967-023-04516-6 (PMC10515258; doi:10.1186/s12967-023-04516-6)

SLC17A7

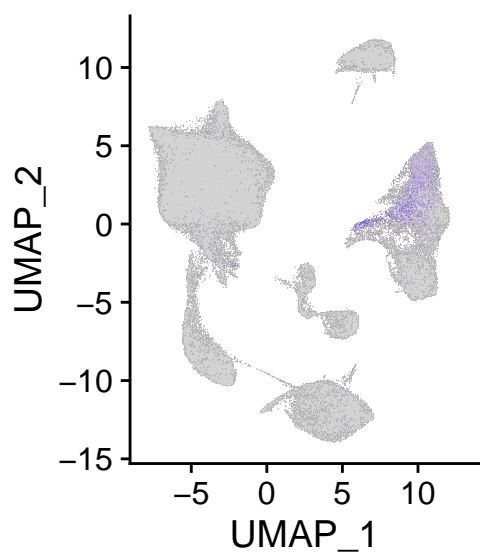

SNAP25

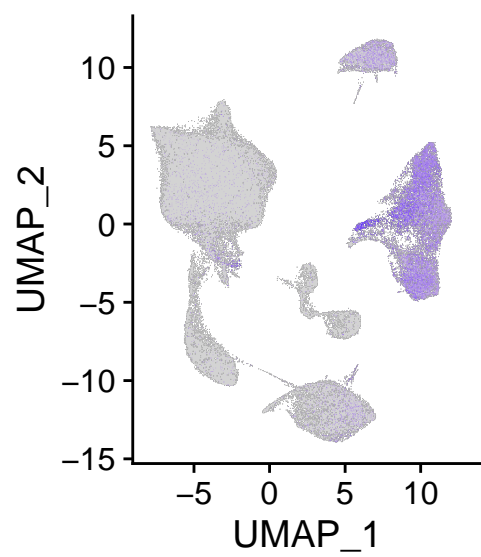

CAMK2A

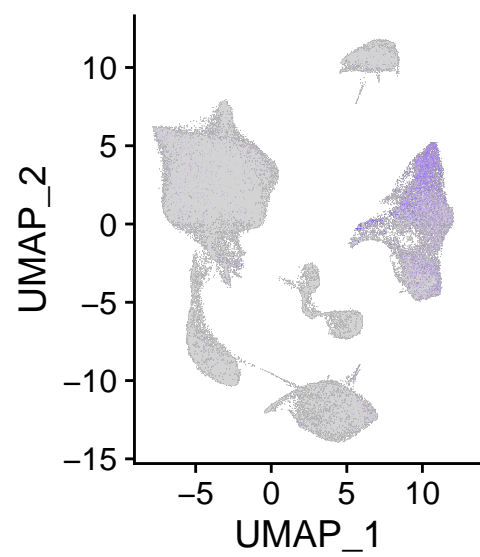

GAD1

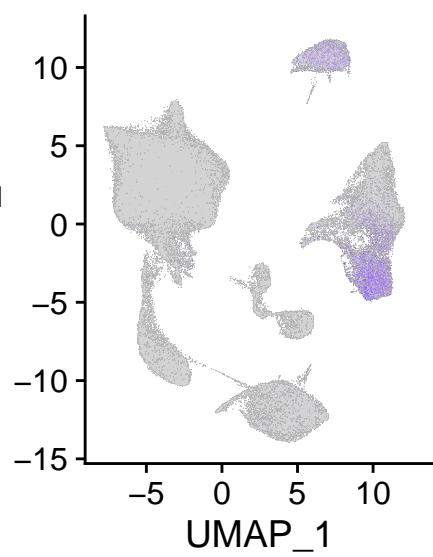

GAD2

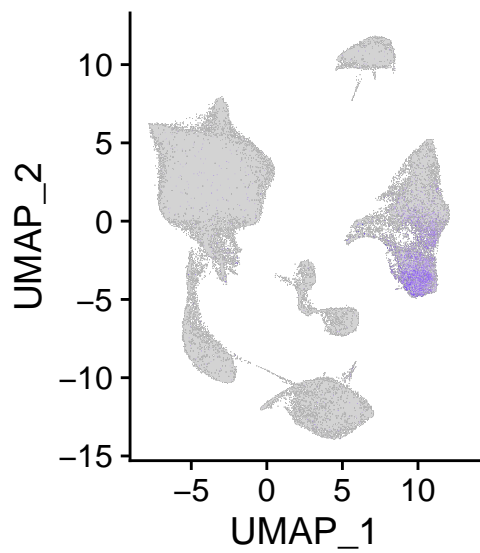

C3

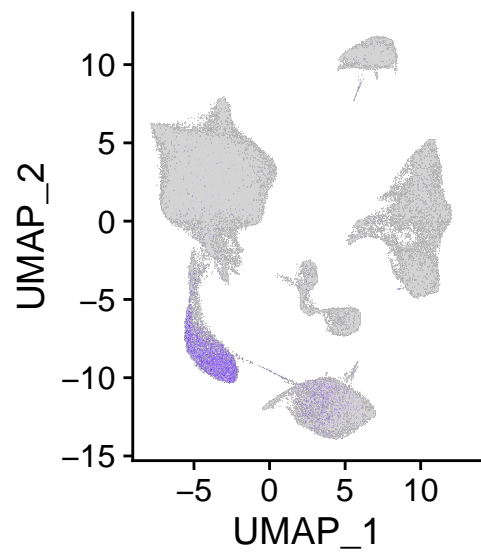

CX3CR1

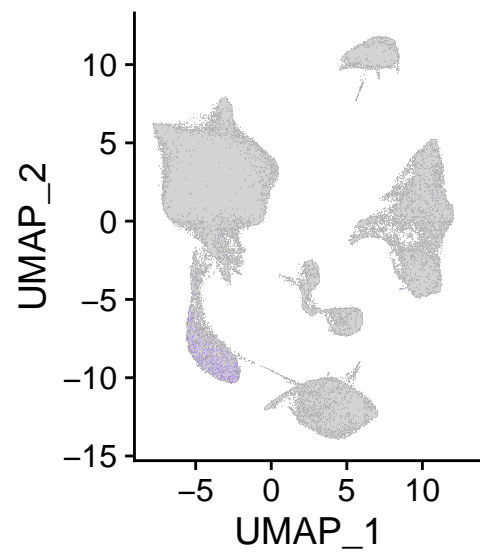

CSF1R

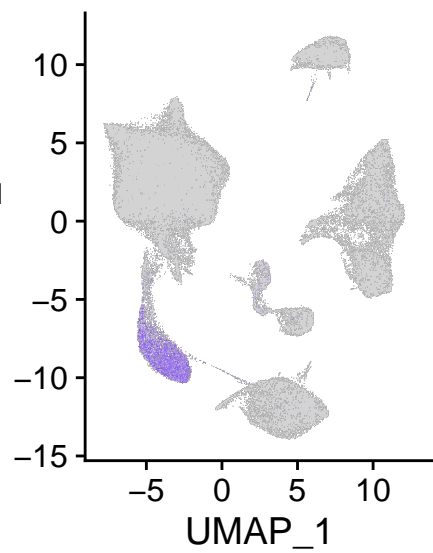

AQP4

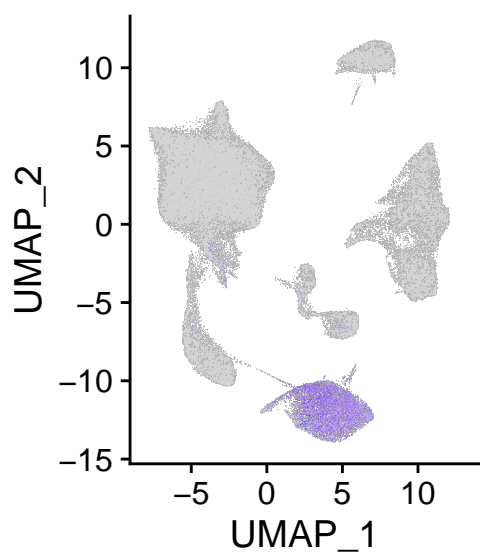

SLC1A2

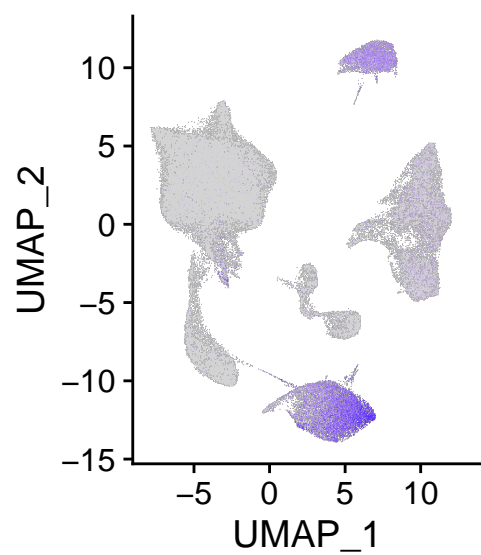

SLC1A3

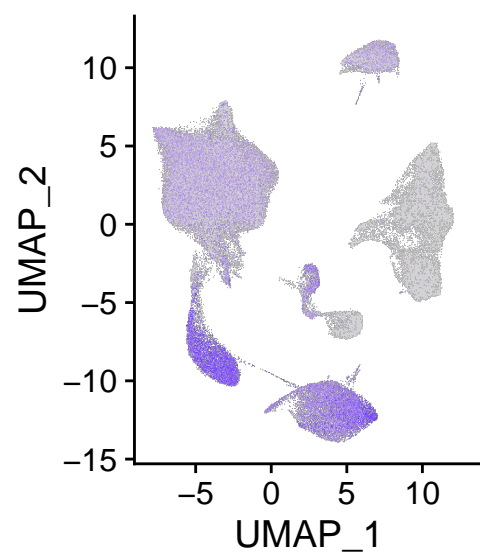

GFAP

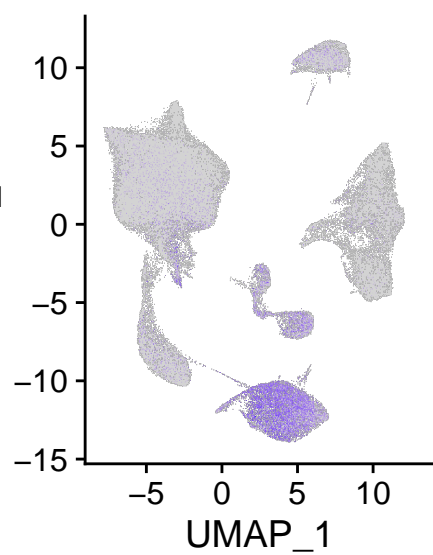

OLIG1

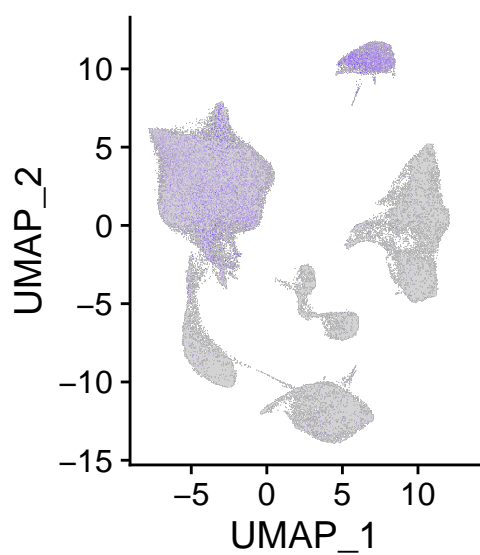

OLIG2

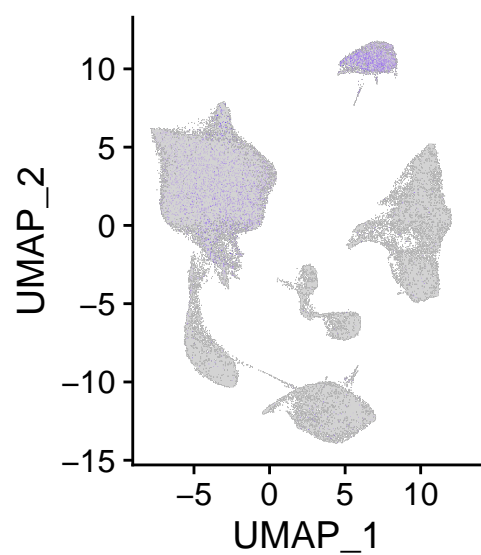

OPALIN

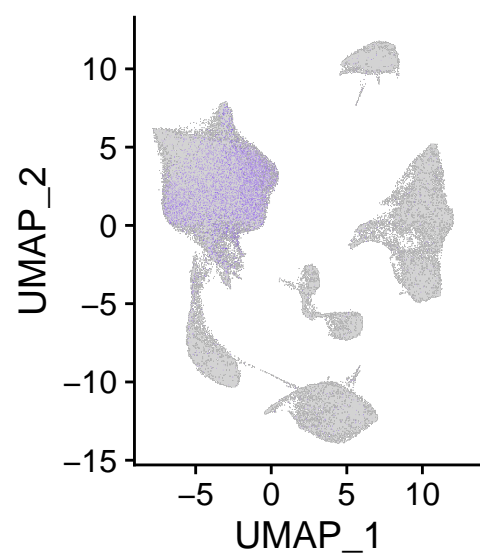

MAG

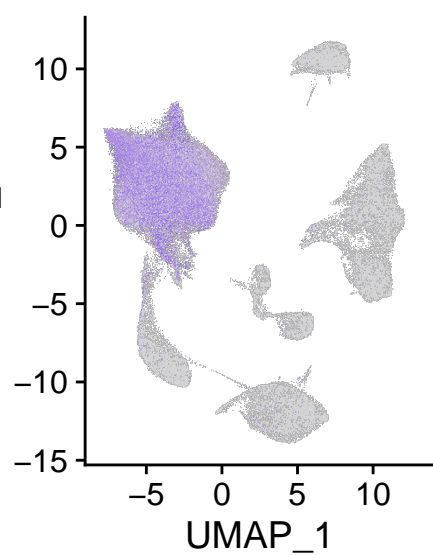

MBP

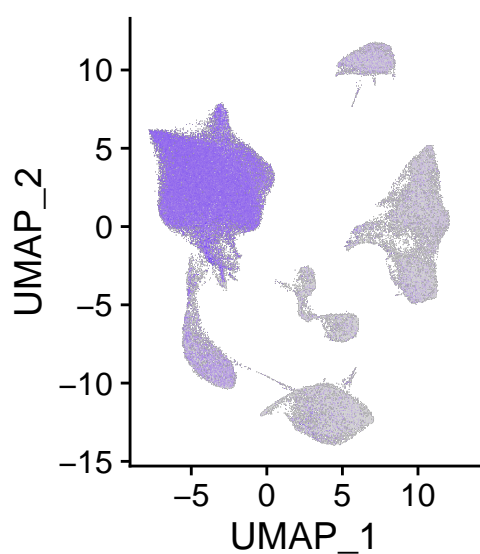

VCAN

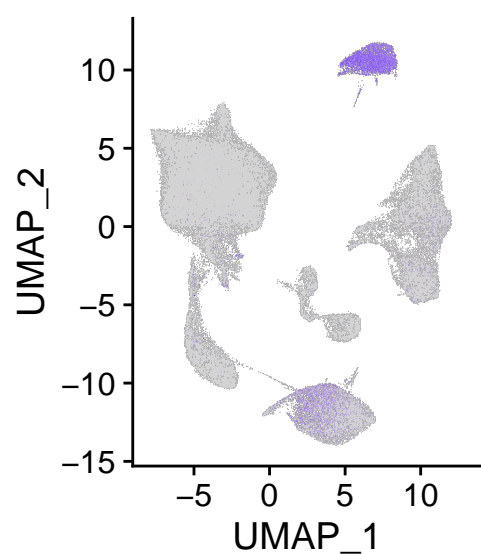

PDGFRA

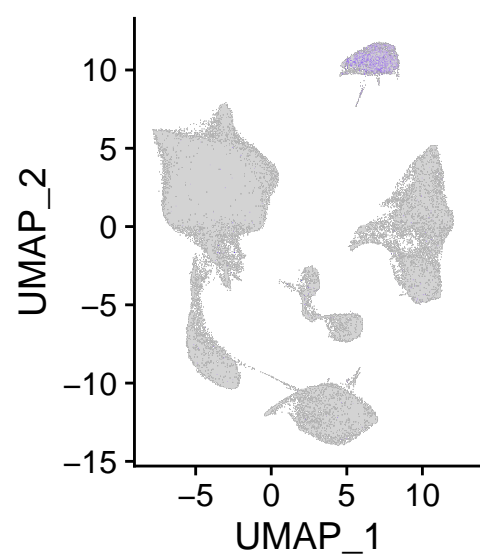

PDGFRB

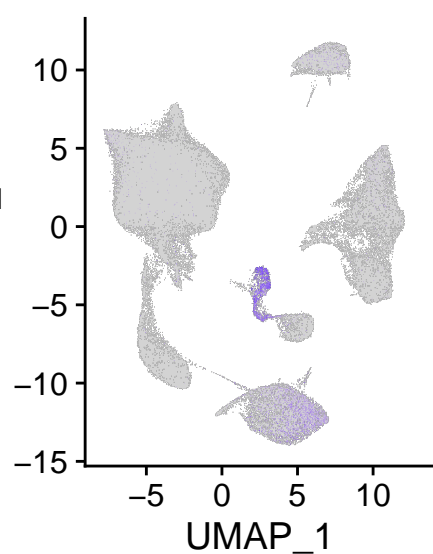

DCDC1

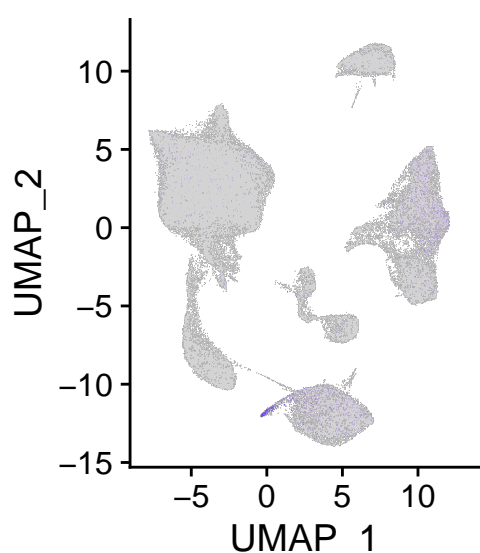

CLDN5

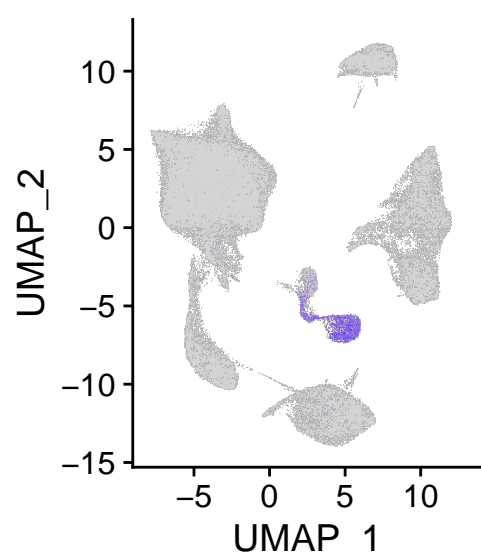

Supplement: Supplementary file 1 — Additional file 1: Fig. S1. The UMAP plots of the expression patterns of the cell markers. [file 12967_2023_4516_MOESM1_ESM.pdf]
