# Supplementary material for: Integrating single-nucleus sequence profiling to reveal the transcriptional dynamics of Alzheimer’s disease, Parkinson’s disease, and multiple sclerosis
Source: J Transl Med. 2023 Sep 21;21:649. doi: 10.1186/s12967-023-04516-6 (PMC10515258; doi:10.1186/s12967-023-04516-6)
Supplement: Supplementary file 6 — Additional file 6: Table S5. The modules of TFs. [file 12967_2023_4516_MOESM6_ESM.xlsx]

## Sheet: SupTable S5
Supplementary Table S5. The modules of TFs.
regulon	cluster
ELK3	M1
STAT6	M1
FLI1	M1
IRF5	M1
SPI1	M1
REL	M1
CEBPA	M1
RREB1	M1
STAT3	M1
FOXN3	M1
ETV6	M1
TAL1	M1
RUNX1	M1
IRF8	M1
IKZF1	M1
RUNX2	M1
PROX2	M1
IRF3	M1
ELF4	M1
MYBL2	M1
ARNT	M1
GABPB1	M1
E2F7	M1
IRF6	M1
POLR3A	M1
MEF2C	M2
NR2F1	M2
GLI1	M2
HLF	M2
PRKAA2	M2
ARX	M2
DLX2	M2
CUX2	M2
ONECUT2	M2
RORA	M2
MEOX2	M2
SOX4	M2
ONECUT1	M2
PAX3	M2
LMX1B	M2
POU4F2	M2
DLX6	M2
GATA3	M2
DLX5	M2
MEIS3	M2
BCL11A	M2
DLX1	M2
TCF7L1	M2
RFX2	M2
SMARCA1	M2
TEAD1	M2
RXRA	M2
RFX3	M2
DMBX1	M2
ONECUT3	M2
ASCL1	M2
RFX7	M2
ETS2	M3
STAT1	M3
RELB	M3
KLF6	M3
IRF1	M3
RUNX3	M3
IRF7	M3
ETS1	M3
LEF1	M3
MECOM	M3
ERG	M3
TEAD4	M3
FOXF1	M3
ETV7	M3
CREM	M3
TFCP2L1	M3
RFX1	M3
OVOL2	M3
FOSL2	M3
CEBPD	M3
GATA2	M3
KLF2	M3
KLF4	M3
TP63	M3
GATA6	M3
NFKB2	M3
JUNB	M3
FOSL1	M3
FOSB	M3
BCL3	M3
POLR2A	M3
CEBPB	M3
JUN	M3
FOS	M3
ATF3	M3
USF2	M3
YY1	M3
EGR1	M4
SRF	M4
NR2F6	M4
ESRRA	M4
NR2F2	M4
TBX15	M4
TEAD3	M4
TFE3	M4
TP53	M4
RARG	M4
SP5	M4
EN1	M4
LHX9	M4
BRF2	M4
HOXB2	M4
TFAP2C	M4
NR1D1	M4
EGR3	M4
EGR4	M4
CREB3	M4
NFE2L1	M4
JUND	M4
DBP	M4
MEF2D	M4
EP300	M5
NR3C1	M5
SP1	M5
NR2C2	M5
ELF1	M5
NFIC	M5
TAF1	M5
GTF3C2	M5
NRF1	M5
FOXO3	M5
CUX1	M5
KDM5A	M5
PPARA	M5
FOXO1	M5
ELF2	M6
POLR3G	M6
SOX10	M6
NFIX	M6
SREBF2	M6
SOX8	M6
RELA	M7
ELK4	M7
GPD1	M7
GRHPR	M7
