# Supplementary material for: Integrating single-nucleus sequence profiling to reveal the transcriptional dynamics of Alzheimer’s disease, Parkinson’s disease, and multiple sclerosis
Source: J Transl Med. 2023 Sep 21;21:649. doi: 10.1186/s12967-023-04516-6 (PMC10515258; doi:10.1186/s12967-023-04516-6)
Supplement: Supplementary file 7 — Additional file 7: Table S6. The regulon scores. [file 12967_2023_4516_MOESM7_ESM.xlsx]

## Sheet: Sheet1
Supplementary Table S6. The regulon scores.
	AD_Astrocytes	AD_Endothelial cells	AD_Excitatory	AD_Inhibitory	AD_Microglia	AD_Oligodendrocytes	AD_OPCs	AD_Pericytes	Ctrl_Astrocytes	Ctrl_Endothelial cells	Ctrl_Ependymal	Ctrl_Excitatory	Ctrl_Inhibitory	Ctrl_Microglia	Ctrl_Oligodendrocytes	Ctrl_OPCs	Ctrl_Pericytes	MS_Astrocytes	MS_Endothelial cells	MS_Ependymal	MS_Excitatory	MS_Inhibitory	MS_Microglia	MS_Oligodendrocytes	MS_OPCs	MS_Pericytes	PD_Astrocytes	PD_Endothelial cells	PD_Ependymal	PD_Excitatory	PD_Inhibitory	PD_Microglia	PD_Oligodendrocytes	PD_OPCs	PD_Pericytes
ARNT	0.0771659	0.00779477	0.0619847	0.0743764	0.103507	0.363183	0.0445749	0.0101483	0.112634	0.0322854	0.0124467	0.0841965	0.0664509	0.103117	0.381401	0.0821095	0.0282194	0.0267963	0.0181899	0.00252755	0.0512662	0.0140576	0.0453518	0.104531	0.00412213	0.0163411	0.0561454	0.0210718	0.0254624	0.0392564	0.0192609	0.0981301	0.142792	0.0351643	0.0169486
ARX	0.0248261	0.00062473	0.0688041	0.316826	0.0202066	0.0419257	0.00962907	0.00375618	0.0290307	0.0111758	0.00027783	0.183542	0.264511	0.027354	0.0229944	0.0197822	0.00968043	0.0268346	0.0183014	0.00036899	0.150215	0.141734	0.066057	0.0383611	0.00330778	0.0103102	0.0111941	0.00515953	0.00150177	0.0943321	0.0653221	0.0083364	0.00445132	0.00817625	0.00241783
ASCL1	0.0357313	0.00206729	0.0193658	0.0216722	0.0253913	0.164258	0.261789	0.00463099	0.0632575	0.00230977	0.00961257	0.02394	0.0236716	0.0281541	0.176638	0.413956	0.0040366	0.0189536	0.00422622	0.00117147	0.0270307	0.00886347	0.0148432	0.0578964	0.0274743	0.0035668	0.0599587	0.00242471	0.0351553	0.0120279	0.00421283	0.0161437	0.0974793	0.227903	0.00127089
ATF3	0.118312	0.00646955	0.0400882	0.015651	0.0827556	0.272162	0.0219002	0.0118441	0.164965	0.0381673	0.0586971	0.0382057	0.0131023	0.0785627	0.264435	0.0352153	0.032199	0.060601	0.0590781	0.00735103	0.0430437	0.00690105	0.0596747	0.127752	0.00436321	0.0452701	0.121709	0.0628134	0.0547707	0.0222509	0.0156087	0.111389	0.169059	0.0178393	0.0319414
BCL11A	0.0737329	0.00270267	0.272966	0.244427	0.0345842	0.208437	0.0782084	0.00662985	0.111011	0.0183354	0.0100103	0.281291	0.177049	0.0338027	0.255062	0.133412	0.0187338	0.0168209	0.0074418	0.00159675	0.167133	0.0392896	0.0128627	0.0520361	0.00682305	0.00756902	0.0538952	0.0121939	0.0167217	0.141626	0.0631193	0.0270884	0.0971045	0.058317	0.0100912
BCL3	0.0776652	0.0112583	0.0360678	0.0128722	0.156386	0.139355	0.0144753	0.0176485	0.0918565	0.112375	0.015485	0.063668	0.0175777	0.114377	0.129898	0.0281087	0.0713785	0.0556762	0.0816076	0.00240757	0.136698	0.0249013	0.134855	0.148615	0.00469797	0.0635687	0.0897114	0.0980468	0.0198572	0.0058766	0.00280122	0.138081	0.039091	0.00596613	0.0432779
BRF2	0.0661377	0.0021809	0.0720308	0.0124725	0.0613462	0.16451	0.0271688	0.0157331	0.0587795	0.0186586	0.00014766	0.0448597	0.019213	0.0494661	0.140719	0.0236499	0.0221449	0.0806897	0.0863303	0.00189299	0.063785	0.00988046	0.190504	0.260462	0.00439301	0.0552389	0.0107251	0.00616446	-2.22e-16	0.00134481	0.00108006	0.0150254	0.00982013	0.00226568	0.00384494
CEBPA	0.0766552	0.00376797	0.0567757	0.0430771	0.24791	0.221339	0.0422864	0.00975659	0.138736	0.038232	0.0101726	0.0782266	0.0390472	0.276796	0.284708	0.0752065	0.0398513	0.0312545	0.0269953	0.00181999	0.0586338	0.0108087	0.116145	0.0850643	0.00531899	0.0281379	0.0758614	0.0299096	0.0148281	0.0344959	0.0133626	0.30008	0.123571	0.0244948	0.0237461
CEBPB	0.0561581	0.00327608	0.0383534	0.00739008	0.0888146	0.12305	0.0158918	0.0100675	0.09302	0.0571799	0.0140402	0.0392462	0.0124067	0.096882	0.129155	0.0394301	0.039227	0.0660131	0.0634429	0.0025399	0.0414262	0.00706781	0.151481	0.162838	0.00581888	0.0547673	0.0704888	0.0606617	0.0117717	0.00475866	0.0025508	0.145407	0.0577522	0.0152808	0.0366948
CEBPD	0.0509735	0.0115256	0.0201797	0.00648405	0.11745	0.0813889	0.0102155	0.0327306	0.0918516	0.118209	0.0174042	0.0331617	0.0107188	0.0954575	0.0851689	0.0276993	0.192767	0.087555	0.117824	0.00162614	0.0471321	0.00959934	0.136037	0.0756487	0.00291201	0.157261	0.0825961	0.114473	0.0184977	0.00268358	0.00147449	0.128017	0.0593101	0.00891463	0.130512
CREB3	0.0392886	0.00489026	0.0428869	0.0282809	0.057938	0.201653	0.0200353	0.00598539	0.0817209	0.0577149	0.0153771	0.131064	0.0446461	0.0543842	0.272442	0.0575481	0.0602876	0.0402396	0.0647415	0.00537613	0.186674	0.0413969	0.0855803	0.217219	0.00948083	0.0539889	0.0438535	0.0513186	0.0230083	0.0322579	0.0167511	0.0627701	0.145372	0.0176018	0.0304024
CREM	0.0668728	0.00741984	0.0599458	0.0325603	0.108953	0.238196	0.152448	0.0245448	0.105322	0.0482633	0.0147297	0.0615714	0.0306043	0.116278	0.239019	0.222286	0.0590818	0.0367949	0.0455796	0.00177977	0.0469251	0.00935985	0.0986052	0.10816	0.0103114	0.0486559	0.0522093	0.0422645	0.021569	0.0249401	0.00981704	0.111115	0.0858324	0.109197	0.0412493
CUX1	0.088455	0.00610667	0.0977486	0.0964838	0.110935	0.39916	0.0519756	0.012047	0.12703	0.0421243	0.0131731	0.110308	0.0718142	0.102683	0.45586	0.0897827	0.0356482	0.0163655	0.0123486	0.00130272	0.0490193	0.0121295	0.0239651	0.0749972	0.00440708	0.012249	0.0716499	0.0291101	0.0200001	0.0570841	0.0238556	0.0978189	0.180057	0.0389347	0.021516
CUX2	0.0560066	0.00085843	0.318617	0.185343	0.0241235	0.0871234	0.145134	0.003599	0.0789869	0.00482427	0.0045362	0.286663	0.140996	0.0203935	0.074481	0.199272	0.00567743	0.0263616	0.0204745	0.00136945	0.182682	0.0267835	0.0544985	0.0917209	0.00998744	0.0130402	0.0269079	0.00025987	0.00955595	0.135821	0.0603315	0.00081114	0.0155946	0.0641598	0.00063297
DBP	0.0395332	0.00881419	0.0783104	0.0656822	0.0143768	0.151197	0.0365503	0.00947658	0.0780856	0.108546	0.00727978	0.137969	0.0587197	0.0201978	0.175339	0.0773141	0.0624517	0.0340109	0.0542207	0.00210205	0.135357	0.0263096	0.011935	0.0824525	0.00449765	0.049994	0.039345	0.0737212	0.0227212	0.0617125	0.020929	0.0116292	0.0702177	0.0472479	0.0327859
DLX1	0.098614	0.00301372	0.0775864	0.325848	0.0188132	0.237742	0.080072	0.00507695	0.139733	0.0156841	0.0119637	0.127397	0.25803	0.0196639	0.302243	0.122987	0.0100009	0.0229117	0.0113523	0.0023819	0.0347995	0.0798658	0.0243295	0.0627413	0.00483434	0.00723214	0.0682817	0.00715567	0.0170259	0.0988496	0.0831796	0.00711952	0.0884258	0.0477054	0.00399386
DLX2	0.025539	0.00439237	0.037762	0.32478	0.0107571	0.030447	0.0614455	0.014372	0.0334953	0.0135067	0.0043108	0.166295	0.315232	0.0135921	0.0236388	0.101902	0.010581	0.00841462	0.00814587	0.00154772	0.0775719	0.144899	0.00431326	0.0244448	0.00585128	0.00196592	0.0110376	0.00559117	0.00298361	0.154316	0.128957	0.00464109	0.00630152	0.0366061	0.00074627
DLX5	0.0264261	0.00222958	0.130889	0.393401	0.00721651	0.0243105	0.0669826	0.00102535	0.040985	0.00110532	0.00686992	0.183788	0.34369	0.0159256	0.0345946	0.0969535	0.00251677	0.00606144	0.00288369	0.00095304	0.0540793	0.131182	0.00115127	0.00343398	0.0031178	2.2e-05	0.0194074	0.00085222	0.0139039	0.122166	0.142208	0.00312724	0.0110489	0.0337278	3.52e-05
DLX6	0.0458331	0.00141012	0.163103	0.398485	0.0153587	0.0429078	0.0357458	0.00564346	0.0708458	0.00505542	0.00944653	0.266566	0.348375	0.0140584	0.0576192	0.0650226	0.00776881	0.0165109	0.00606551	0.00277106	0.123362	0.119445	0.0170994	0.0256113	0.00394518	0.00375271	0.0321378	0.00216382	0.0237969	0.168252	0.149176	0.0105179	0.0226776	0.0213156	0.00295118
DMBX1	0.00504067	0	0.00952238	0.00440715	0.00589142	0.00289044	0.00390306	-4.44e-16	0.0107383	9.99e-16	2.22e-16	0.0232657	0.0852589	0.00351159	0.00232143	0.0116548	4.44e-16	-1.33e-15	4.44e-16	0	0.0146202	0.0134743	1.89e-15	0.0027296	2.22e-16	-4.44e-16	0.032943	0.00678273	0.00770189	0.0196507	0.221635	0.0072309	4.24e-05	0.00693038	0.0220742
E2F7	0.0164022	5.55e-16	0.0138335	0.0150304	0.056683	0.0473915	0.00869617	0.00839352	0.0225692	0.0146438	0.0038844	0.0165632	0.0171586	0.0468785	0.057928	0.02936	0.020525	0.0273221	0.0117944	0.00201449	0.0247112	0.0131489	0.00999248	0.0356486	6.66e-16	0.021601	0.035113	0.0232966	0.014656	0.00435491	0.00233838	0.072904	0.0271386	0.0132851	0.0183876
EGR1	0.0906522	0.00996133	0.0859421	0.0396316	0.0619441	0.157167	0.0304274	0.0274186	0.163048	0.082315	0.0378291	0.159802	0.0501975	0.0731435	0.208674	0.0802779	0.122599	0.0604589	0.107786	0.00652035	0.212891	0.0341359	0.108742	0.149105	0.00890299	0.127945	0.073165	0.0666292	0.0267897	0.0410577	0.0203728	0.0556436	0.0725687	0.0289349	0.0734785
EGR3	0.0536434	0.00417076	0.204801	0.0829242	0.0655144	0.184452	0.0306374	0.0124591	0.0924996	0.0373071	0.00923159	0.272389	0.0845413	0.0606952	0.207932	0.0645804	0.0419811	0.0321526	0.0433865	0.00201439	0.357113	0.0461332	0.0425759	0.118502	0.00631088	0.0447471	0.0493929	0.0279954	0.00981518	0.0684165	0.0314489	0.0579033	0.0728119	0.0188641	0.021866
EGR4	0.0679722	0.00356369	0.167998	0.0959117	0.0432163	0.174747	0.0252471	0.0105747	0.116428	0.0215984	0.00898183	0.279278	0.0946733	0.0429776	0.21155	0.0622202	0.0339168	0.0399324	0.0274019	0.00100492	0.324605	0.0577952	0.0444019	0.109605	0.00788301	0.0344172	0.0602611	0.0161954	0.00993979	0.088367	0.0379391	0.0367555	0.0784197	0.0246688	0.0198169
ELF1	0.0786376	0.00713332	0.0438618	0.0408046	0.124251	0.429658	0.0410599	0.0109489	0.113104	0.0542428	0.0086956	0.0497924	0.0311683	0.11635	0.494831	0.0738111	0.0380632	0.0170064	0.0184472	0.00115374	0.028607	0.00644755	0.0288593	0.0946746	0.00423822	0.0159529	0.0680831	0.0382045	0.015292	0.0242469	0.00974826	0.115949	0.212326	0.0337697	0.0232731
ELF2	0.0691764	0.00518616	0.060393	0.0610544	0.0885023	0.456133	0.0442925	0.00971795	0.101796	0.0360825	0.00916525	0.070185	0.0454666	0.0829765	0.518876	0.0780097	0.0284585	0.01343	0.0109435	0.00096369	0.0305907	0.00773134	0.0190066	0.0854598	0.0037316	0.00987306	0.055943	0.025514	0.0159948	0.0367776	0.0150876	0.0797793	0.217813	0.0357154	0.0176614
ELF4	0.0509447	0.00672032	0.0252093	0.0215435	0.197771	0.0791418	0.0236131	0.0105191	0.0717784	0.0348192	0.00547383	0.0278871	0.0230266	0.203741	0.100816	0.0580684	0.0347272	0.0285176	0.019423	0.00049044	0.0453832	0.0126011	0.231369	0.0640395	0.00809059	0.0330192	0.0450832	0.034648	0.0112173	0.00610282	0.0060435	0.223405	0.0316351	0.0231664	0.0194291
ELK3	0.0806238	0.0149715	0.0500705	0.0547805	0.23725	0.289449	0.0443282	0.0134944	0.120518	0.113783	0.0102041	0.0630545	0.0458995	0.226273	0.320466	0.0824263	0.0618491	0.0262111	0.0498225	0.00139712	0.0435034	0.0101987	0.0648977	0.0944453	0.00522838	0.032633	0.0671474	0.0818414	0.0145987	0.0248664	0.0130557	0.234133	0.114099	0.0350196	0.0366707
ELK4	0.0460124	0.00412887	0.0516812	0.0287737	0.068866	0.428183	0.0225211	0.00745473	0.0623332	0.021684	0.00586926	0.0650757	0.0310562	0.0706278	0.448084	0.0363801	0.0225594	0.0276726	0.0242947	0.00227915	0.0570557	0.0116545	0.0618605	0.134946	0.00381423	0.0188388	0.0362565	0.0264901	0.0154809	0.0259701	0.0142743	0.0601487	0.207367	0.0167832	0.0136756
EN1	0.0429618	0.00336804	0.0692581	0.081872	0.0465038	0.113909	0.02796	0.0114823	0.046222	0.0161325	0.0321656	0.150186	0.109983	0.0425907	0.105844	0.0520707	0.0204625	0.0493299	0.037291	0.00222808	0.0810454	0.0210615	0.123972	0.159263	0.00425134	0.02736	0.030862	0.00926988	0.0360301	0.132863	0.0652784	0.0213093	0.0408131	0.0179285	0.00519781
EP300	0.0865647	0.00615376	0.0871038	0.0864108	0.113135	0.394173	0.0495543	0.0135287	0.130556	0.0434742	0.0114421	0.100236	0.0659276	0.105911	0.441151	0.093189	0.0365871	0.021326	0.0168361	0.00159429	0.0558444	0.0144046	0.033753	0.0922377	0.00473278	0.0160195	0.0690157	0.0309007	0.019912	0.0515664	0.0215262	0.103566	0.173501	0.0399484	0.0231408
ERG	0.0847698	0.0298231	0.0859154	0.0823019	0.0824831	0.293747	0.0457276	0.0197021	0.129221	0.225688	0.0140968	0.100855	0.0612321	0.0788087	0.341272	0.0836749	0.115918	0.026739	0.0863547	0.00210839	0.0643555	0.0142699	0.0426247	0.0904464	0.0046366	0.0558213	0.0745101	0.164169	0.0204999	0.0439001	0.0179288	0.0779468	0.140614	0.0366152	0.066282
ESRRA	0.158792	0.00652317	0.0627771	0.0720015	0.0855492	0.150698	0.0244249	0.0200761	0.278582	0.0712943	0.022037	0.125514	0.080561	0.0719622	0.184128	0.061567	0.0735114	0.0670377	0.0410237	0.00348695	0.150503	0.0418953	0.0396883	0.102319	0.00834956	0.039845	0.191856	0.0471434	0.0235354	0.0377433	0.0265846	0.0681536	0.0745507	0.0227531	0.0424486
ETS1	0.0851377	0.0208868	0.0749674	0.0812008	0.0931111	0.304213	0.0720521	0.0299555	0.123428	0.156694	0.0130922	0.0949855	0.0618	0.0849687	0.348834	0.123703	0.141292	0.027408	0.0647826	0.00186923	0.0548662	0.0136685	0.0557165	0.0932837	0.0061579	0.0606196	0.0682535	0.119361	0.0179547	0.0472874	0.0195318	0.0876472	0.129412	0.0553301	0.0899704
ETS2	0.0758849	0.018803	0.0990957	0.0765329	0.196505	0.251181	0.0363789	0.0159021	0.116436	0.143535	0.0129236	0.120949	0.0630808	0.186157	0.296251	0.0756028	0.080705	0.0268762	0.0619316	0.00209108	0.0983063	0.0196043	0.0694173	0.0975247	0.00523209	0.0419556	0.0664252	0.108014	0.019151	0.0465949	0.0218923	0.195033	0.112532	0.0303513	0.0485092
ETV6	0.0985924	0.00799911	0.0790977	0.0745853	0.263598	0.277009	0.0601818	0.0123812	0.140052	0.0551095	0.0132845	0.0866175	0.0548404	0.246167	0.313486	0.101061	0.0405739	0.0209354	0.0205996	0.00135756	0.0436662	0.00974838	0.0542437	0.0584687	0.00498159	0.0174585	0.0806553	0.0402434	0.0191929	0.0405475	0.0180109	0.251062	0.116203	0.0444288	0.0255092
ETV7	0.02321	0.0224313	0.0251919	0.0179049	0.101912	0.107177	0.0227627	0.0167599	0.0263996	0.172644	0.0055232	0.0193588	0.0259983	0.0857025	0.0892839	0.0439177	0.0353381	0.00892401	0.0488069	-1.78e-15	0.0111364	0.00727928	0.0533059	0.029325	0.00375962	0.0217124	0.0141501	0.218874	0.00736459	0.00825679	0.00529657	0.0903769	0.0302052	0.0130805	0.0466451
FLI1	0.0811359	0.0133075	0.0673806	0.0650442	0.246947	0.292392	0.0430167	0.0134922	0.121817	0.0965732	0.0120304	0.0795293	0.0496365	0.234215	0.335741	0.0781547	0.0555918	0.0199889	0.0340495	0.00142816	0.0462398	0.0103689	0.0566067	0.0722175	0.00423399	0.024922	0.0696861	0.0709511	0.0180865	0.0372304	0.0167249	0.238049	0.131354	0.0336101	0.0345759
FOS	0.112463	0.00623735	0.043963	0.0232751	0.0738798	0.306898	0.024452	0.00980706	0.17244	0.0585354	0.0364334	0.066815	0.0251848	0.0830523	0.331981	0.0478383	0.0487591	0.0526131	0.0625935	0.00485266	0.070296	0.0152504	0.0801054	0.138234	0.00424607	0.0505383	0.124309	0.064903	0.0423214	0.0258175	0.0125321	0.0959283	0.186911	0.0242087	0.035779
FOSB	0.0805537	0.0124342	0.0469314	0.0201616	0.0687039	0.176565	0.0152414	0.0204934	0.137605	0.0694108	0.0308117	0.0685474	0.0251904	0.0710999	0.171774	0.0480278	0.0902975	0.067565	0.123244	0.00255133	0.122147	0.0190308	0.15936	0.176263	0.00394589	0.155556	0.0675458	0.0623963	0.013181	0.0120693	0.0053228	0.052842	0.0446811	0.0144571	0.0442643
FOSL1	0.0970159	0.0209104	0.0453384	0.021133	0.0761432	0.136724	0.0206299	0.02258	0.110352	0.177026	0.0151829	0.0448306	0.025067	0.0740154	0.122259	0.0394554	0.102511	0.0788327	0.184733	0.00356202	0.0735806	0.0131766	0.14356	0.18179	0.00741699	0.120412	0.0830631	0.140142	0.0109681	0.00369052	0.00187062	0.0495637	0.0134706	0.00794791	0.0505963
FOSL2	0.110555	0.0263593	0.0762275	0.0646162	0.0991265	0.24943	0.0412085	0.0241419	0.163847	0.19	0.0209369	0.0874738	0.0500741	0.0916847	0.277784	0.0801605	0.114022	0.0543147	0.106975	0.00389517	0.0693479	0.0155097	0.0809741	0.11035	0.00575128	0.0771301	0.105425	0.155321	0.0297005	0.0323964	0.0145089	0.0957107	0.109902	0.0352813	0.0711794
FOXF1	0.062014	0.0438014	0.0317423	0.0221679	0.0665673	0.140131	0.0195833	0.0216388	0.0961153	0.286932	0.0227001	0.029	0.0138796	0.055271	0.15638	0.0228366	0.145032	0.0475639	0.155349	0.00354488	0.0326905	0.00511364	0.0370752	0.0797376	0.00321705	0.0857906	0.124325	0.231438	0.0326481	0.00560322	0.00272444	0.0685422	0.0585506	0.0117246	0.0864254
FOXN3	0.100407	0.00725608	0.0540702	0.0601624	0.2458	0.227006	0.0676563	0.0089392	0.141281	0.04796	0.0173247	0.0900116	0.0542499	0.259323	0.266318	0.113057	0.0332215	0.0193812	0.010516	0.00193858	0.0384409	0.00582581	0.035113	0.0405527	0.00595087	0.0102495	0.0957876	0.0325662	0.0287947	0.0528009	0.0258718	0.259762	0.134569	0.0484617	0.0231011
FOXO1	0.132006	0.00620431	0.0386309	0.0485107	0.0791115	0.41808	0.0503881	0.0103759	0.18526	0.0420326	0.0172546	0.0528529	0.037206	0.0737952	0.481158	0.0844815	0.0317698	0.0244959	0.0139946	0.00171288	0.0213307	0.0060269	0.0195147	0.081256	0.00434708	0.0117517	0.114039	0.0302248	0.0259949	0.0286721	0.0132794	0.0715407	0.210451	0.0397105	0.0193155
FOXO3	0.0955775	0.00576374	0.0952461	0.0938577	0.0981302	0.39016	0.0526114	0.0115175	0.140403	0.0387497	0.0150727	0.10105	0.0665483	0.0954637	0.449494	0.086902	0.0342408	0.0197809	0.0129899	0.00163784	0.0472665	0.0119959	0.0253969	0.0773502	0.00411843	0.0125229	0.084047	0.0272394	0.0247996	0.0562228	0.0245403	0.0949879	0.18484	0.0390632	0.0218373
GABPB1	0.0641201	0.00666722	0.0444894	0.0464104	0.0945821	0.275018	0.0501219	0.0120309	0.109304	0.0332848	0.00822387	0.0683818	0.0372862	0.0921921	0.308705	0.0788954	0.031235	0.0166534	0.012892	0.00118793	0.057509	0.0176404	0.0449191	0.0832152	0.00560393	0.0107813	0.0535408	0.0218558	0.0115403	0.0398236	0.0156699	0.0776798	0.116425	0.0356694	0.0141644
GATA2	0.0758511	0.0413095	0.0979136	0.0896555	0.0814324	0.227006	0.0376868	0.016933	0.100629	0.290711	0.00674372	0.0990554	0.0662404	0.0698973	0.217915	0.0660354	0.116203	0.0406409	0.121026	0.00237	0.0594657	0.0140066	0.0805252	0.127897	0.00562154	0.0685625	0.0429538	0.208304	0.0111133	0.0473312	0.0193139	0.0580732	0.0679658	0.0257974	0.0638737
GATA3	0.0222229	0.00294505	0.0480625	0.323115	0.0114537	0.0329113	0.0432158	0.00411565	0.0411664	0.0265475	0.00310978	0.150385	0.364116	0.0155832	0.0553304	0.0718899	0.020428	0.00761674	0.00851059	0.00024386	0.0375476	0.116078	0.0077193	0.0192712	0.00281295	0.00617014	0.0332031	0.0162424	0.00827555	0.186427	0.256264	0.0154868	0.0249584	0.0258684	0.0112483
GATA6	0.0219475	0.0185136	0.027682	0.0125711	0.0417351	0.070219	0.00848017	0.0364058	0.0609645	0.0743821	0.0581098	0.0377317	0.0155247	0.0412321	0.0910153	0.0304282	0.1338	0.0312976	0.0639935	0.00420644	0.0779699	0.00947228	0.0310287	0.0756069	0.011991	0.128138	0.0814619	0.0488194	0.0568122	0.00619652	0.00431872	0.0659707	0.0316868	0.0179561	0.0602815
GLI1	0.151264	0.00195862	0.0607869	0.0694016	0.031123	0.12856	0.111867	0.00658433	0.216898	0.0393423	0.0186658	0.129708	0.0569396	0.027842	0.13995	0.168154	0.0228427	0.0326856	0.0222939	0.00225325	0.0921623	0.0216274	0.024941	0.0707191	0.0158743	0.0117949	0.232325	0.0315254	0.0205067	0.0721683	0.0195374	0.0128808	0.0528459	0.0548272	0.0102687
GPD1	0.0425162	0.00165276	0.0288832	0.0166052	0.0216548	0.310783	0.0148434	0.0063999	0.0891643	0.0295062	0.00606056	0.0529693	0.0224877	0.035106	0.563406	0.0463366	0.0372808	0.0309411	0.0228649	0.00138856	0.0645172	0.0128074	0.0333669	0.245685	0.00776819	0.0242621	0.0469721	0.0166535	0.00602108	0.0125599	0.00680949	0.0255859	0.255571	0.017164	0.0157109
GRHPR	0.0368777	0.00172893	0.0224919	0.00617795	0.0245562	0.444655	0.0278285	0.00478921	0.0697428	0.0163533	0.00247925	0.0277893	0.0100167	0.0283971	0.559451	0.0775404	0.0204342	0.0197998	0.0151586	0.00086798	0.0324119	0.00605855	0.0223119	0.208648	0.00723648	0.0133374	0.0382831	0.00960554	0.0041417	0.00441688	0.00198226	0.0228342	0.230013	0.0317502	0.00924577
GTF3C2	0.065186	0.00545537	0.0450194	0.0389017	0.137008	0.366922	0.0234187	0.00984848	0.0856988	0.0227647	0.0091209	0.0521205	0.0373875	0.130785	0.405963	0.0528288	0.019672	0.0129043	0.0105879	0.00040324	0.0260872	0.00537993	0.03337	0.0876634	0.00300097	0.0103976	0.0406011	0.0133898	0.012549	0.0173804	0.00674113	0.10778	0.127231	0.020601	0.0129187
HLF	0.085217	0.00826763	0.27378	0.179245	0.0434206	0.169324	0.0738185	0.0105833	0.134251	0.0696033	0.0121557	0.289244	0.138768	0.0414152	0.208511	0.125352	0.0417173	0.0247481	0.0265705	0.0020349	0.221651	0.0389485	0.0261937	0.0714762	0.00700221	0.0201285	0.0665101	0.048446	0.0184554	0.119877	0.054054	0.0348459	0.0797433	0.0544642	0.022793
HOXB2	0.0621471	0.00413748	0.066389	0.00672355	0.062883	0.140844	0.021961	0.0114307	0.0476159	0.0115262	-4.44e-16	0.0328864	0.0101636	0.0431455	0.0940197	0.0186452	0.0106044	0.0957978	0.0868519	0.00233495	0.0537508	0.00297134	0.272696	0.24991	0.00261782	0.0531077	0.00366781	0.00732497	-8.88e-16	0.00032871	0	0.0123017	0.00326141	0.00020717	2.22e-16
IKZF1	0.0889203	0.00621642	0.0708732	0.0617119	0.27455	0.292339	0.0492153	0.0108314	0.128528	0.0428782	0.0125903	0.0778977	0.0464602	0.2606	0.33677	0.0830881	0.0342679	0.0179002	0.0154965	0.00127628	0.0399777	0.00816156	0.0490022	0.0582304	0.00391726	0.0133915	0.0709353	0.0319353	0.0176432	0.0360991	0.0154959	0.260504	0.13404	0.0369469	0.02152
IRF1	0.0737621	0.0221705	0.0474074	0.0268693	0.165199	0.227703	0.0272783	0.0154533	0.119849	0.155752	0.0110655	0.0660645	0.0296962	0.154818	0.257447	0.0625502	0.073344	0.0511534	0.0936662	0.00227969	0.0612434	0.0113055	0.106946	0.123565	0.00520314	0.0558073	0.0843825	0.207172	0.0152854	0.0224941	0.00971138	0.157338	0.0994323	0.0267005	0.0631049
IRF3	0.0212465	0.0227644	0.0128154	0.0109813	0.168155	0.0469343	0.0234111	0.016089	0.0380293	0.116536	0.00013552	0.0110905	0.0120675	0.13546	0.0384603	0.0659493	0.0364753	0.0166671	0.0750023	-8.88e-16	0.0161	0.00475005	0.0708563	0.027691	0.0100647	0.0496829	0.0204097	0.0839613	0.0141661	0.00048547	0.00702569	0.145367	0.0134822	0.0153379	0.0149435
IRF5	0.0800697	0.00772994	0.0485612	0.0465634	0.30576	0.219625	0.0331255	0.0130382	0.126627	0.059639	0.0101486	0.057028	0.0370762	0.289259	0.249501	0.0627314	0.0407684	0.0334071	0.0365493	0.00135232	0.0487913	0.00954021	0.101693	0.103332	0.00531853	0.0287773	0.0736385	0.041502	0.0170308	0.0221768	0.0111311	0.283358	0.0821762	0.0252004	0.0231193
IRF6	0.00421988	0.00115979	0.00232135	0.004732	0.0525824	0.04651	0.00242114	0.0108389	0.0293152	0.012069	0.0129319	0.00733193	0.00916952	0.0415865	0.0537436	0.0209835	0.0159682	0.0157273	0.00310194	0	0.00771901	0.00336442	0.0156124	0.0150419	1.11e-16	0.0150148	0.0353374	0.0198472	0.0113931	0.00763899	0.00672112	0.0592424	0.0410174	0.0192604	0.0148871
IRF7	0.0817733	0.0120846	0.0551657	0.0248538	0.158065	0.236237	0.0435869	0.0200625	0.11303	0.0973128	0.010604	0.0551553	0.0258089	0.145579	0.245938	0.0724324	0.0568261	0.0514299	0.0822905	0.00230167	0.0550036	0.00864697	0.129318	0.164743	0.00544327	0.0569539	0.0579173	0.0937024	0.0165792	0.0176949	0.00828409	0.123562	0.0948568	0.0337806	0.0328295
IRF8	0.0681859	0.00549513	0.065311	0.0577864	0.315647	0.276122	0.0443843	0.0100158	0.101747	0.0387256	0.00901041	0.0703887	0.0443259	0.298096	0.311943	0.0774944	0.030221	0.0170245	0.0171623	0.0010023	0.039152	0.00807334	0.0626533	0.0650424	0.00430439	0.0144894	0.0528577	0.0282398	0.0135411	0.0309492	0.0144238	0.297075	0.112733	0.0328522	0.0181076
JUN	0.121613	0.00674962	0.0583068	0.0355132	0.067479	0.297061	0.0288549	0.00981616	0.190141	0.0635296	0.0419477	0.0820074	0.0335193	0.0742137	0.333647	0.0560812	0.0565249	0.060006	0.0683028	0.00667436	0.0766293	0.0166409	0.0769812	0.1385	0.00441312	0.0537986	0.130023	0.0656017	0.0525667	0.0334989	0.015782	0.0853926	0.171356	0.0263329	0.0387704
JUNB	0.0935216	0.0127204	0.0259801	0.0134543	0.077942	0.147141	0.0212929	0.0193092	0.186229	0.109979	0.0331146	0.0707715	0.0249995	0.106127	0.225389	0.0743477	0.0961103	0.0671535	0.113056	0.00750309	0.0891367	0.0218025	0.190733	0.176504	0.00926849	0.102979	0.0930615	0.0890103	0.0300675	0.0120916	0.00644825	0.0845017	0.0906341	0.0202728	0.0538751
JUND	0.0548832	0.00339676	0.0700184	0.0521606	0.0445295	0.336374	0.0225904	0.0074064	0.0945291	0.03847	0.0124051	0.138413	0.057398	0.0491245	0.460739	0.0564491	0.0400213	0.0314902	0.0279675	0.00240043	0.145032	0.0294094	0.0396513	0.183149	0.00640447	0.0246262	0.0626608	0.0336	0.0181551	0.0550473	0.026163	0.0521818	0.230907	0.0262825	0.0246384
KDM5A	0.0853415	0.0066597	0.0982616	0.0897953	0.11194	0.40503	0.0493338	0.0128933	0.120074	0.040383	0.0132215	0.107352	0.0696086	0.102958	0.454521	0.086899	0.036359	0.0178791	0.0135432	0.00145316	0.0501529	0.0125887	0.0282615	0.083274	0.00468227	0.0133343	0.0626019	0.029326	0.0203257	0.0519707	0.0221857	0.0953892	0.181032	0.0364439	0.0217404
KLF2	0.0811081	0.031128	0.0482455	0.040139	0.0658551	0.177881	0.0275251	0.0230893	0.14216	0.27076	0.0200468	0.0854433	0.0370009	0.0769293	0.231815	0.0659172	0.172255	0.0470664	0.147733	0.0038746	0.0925507	0.0163888	0.102838	0.134803	0.00754532	0.114352	0.0737847	0.196165	0.0209523	0.0226981	0.00951837	0.0693117	0.0850496	0.0245664	0.0930313
KLF4	0.0761383	0.0310528	0.0297988	0.0235231	0.0469409	0.121231	0.0162714	0.0192597	0.159329	0.268457	0.0181196	0.0653773	0.0352722	0.0568202	0.205213	0.0586477	0.15705	0.0571859	0.203805	0.0118973	0.0819891	0.0178143	0.105693	0.137032	0.00806157	0.148988	0.0665563	0.187716	0.0178404	0.0150454	0.0115968	0.0512217	0.0833887	0.0174609	0.0750543
KLF6	0.108082	0.0168141	0.031773	0.0245616	0.16086	0.283908	0.0331483	0.0220098	0.145781	0.131127	0.0175552	0.0487248	0.0232537	0.14619	0.312146	0.0643467	0.0976497	0.0296151	0.0584423	0.00193497	0.0369677	0.00662521	0.0785146	0.0919891	0.00411887	0.0493793	0.107628	0.120292	0.0246333	0.0164181	0.00969558	0.168536	0.139877	0.0312071	0.0690235
LEF1	0.0569968	0.0412514	0.053353	0.0421653	0.0607606	0.14448	0.0129414	0.042865	0.0883836	0.294504	0.0184196	0.104742	0.0526911	0.0438996	0.154859	0.0340481	0.215981	0.0186522	0.127986	0.00224159	0.0682399	0.00949079	0.0278875	0.0415666	0.00318907	0.0971729	0.0641688	0.219168	0.0248695	0.0468846	0.0265942	0.0487171	0.0715299	0.00944811	0.147867
LHX9	0.0454452	0.00024407	0.0658084	0.067098	0.0400538	0.113364	0.0178867	0.014015	0.0366838	0.00537525	0.0122196	0.134871	0.0610077	0.0292251	0.0638899	0.0217705	0.0109592	0.0707103	0.0596368	0.00290361	0.0475068	0.00512865	0.182026	0.177455	0.00228805	0.0336904	0.00653964	0.00064082	0.0197879	0.219347	0.0471873	0.00240952	0.00348258	4.44e-15	0.00376884
LMX1B	0.0209903	0.00079553	0.110294	0.112126	0.0030289	0.0238873	0.00551527	0.0103602	0.0434826	0.00299705	0.0102971	0.160008	0.0637848	0.00217454	0.026889	0.0146653	0.019791	0.0124139	0.00066559	-2.22e-16	0.066998	0.0146943	1.67e-15	0.00892362	0.00068731	0.0046696	0.0595088	0.00150164	0.0410547	0.0378194	0.0195467	0.00589872	0.00713433	0.00561209	0.00213155
MECOM	0.0659531	0.0745693	0.0343065	0.0313397	0.0109042	0.0579392	0.0552505	0.0263337	0.0658766	0.45646	0.0200733	0.0461001	0.0280243	0.00847073	0.0428867	0.0855554	0.191259	0.0186478	0.177117	0.0009491	0.0367885	0.00654426	0.0114658	0.0132506	0.0050314	0.103777	0.0446426	0.330881	0.0291288	0.0193772	0.00700635	0.0072848	0.0163398	0.0392667	0.116594
MEF2C	0.105629	0.00629753	0.217802	0.184882	0.189161	0.168073	0.0711327	0.0114722	0.148516	0.0477769	0.0133066	0.214852	0.130476	0.17892	0.188826	0.119169	0.0347088	0.0205205	0.0170895	0.0016329	0.138126	0.0287712	0.0375552	0.0447646	0.00582545	0.0146752	0.0793701	0.0318934	0.0192751	0.0916712	0.0395935	0.1773	0.0642009	0.0520504	0.0205639
MEF2D	0.0731662	0.0037999	0.0947548	0.0858541	0.0728005	0.376975	0.0338689	0.0123689	0.115287	0.0333374	0.0133177	0.132189	0.0668594	0.0752107	0.435771	0.0675448	0.0483967	0.0209265	0.0221701	0.00177835	0.123322	0.0186532	0.0285732	0.104589	0.00548639	0.0277559	0.06666	0.0245032	0.016395	0.0444643	0.0209859	0.0679558	0.15262	0.0287727	0.0314963
MEIS3	0.0114275	0.0023475	0.270019	0.294304	0.00923887	0.0176004	0.0865135	0.00428355	0.0159023	0.00465593	0.0031457	0.357525	0.236414	0.00551785	0.00979384	0.0928455	0.00680179	0.00388541	0.00248325	0.00011045	0.197593	0.0547849	0.00350239	0.00676463	0.00458153	0.00498849	0.0097585	0.00137965	0.00544273	0.194749	0.0856996	0.00495971	0.0049243	0.0287185	0.0052418
MEOX2	0.0503805	0.00449777	0.284698	0.200046	0.0188741	0.0161687	0.0133612	0.0126205	0.176745	0.0182695	0.0339976	0.21511	0.148674	0.0179549	0.0188806	0.049155	0.0264713	0.0187705	0.00833167	0.00283542	0.133359	0.0170307	0.00566922	0.0166308	0.00349704	0.0154273	0.19663	0.00786304	0.0250096	0.140896	0.0831972	0.00942838	0.0083262	0.0114025	0.0112664
MYBL2	0.0308377	0.00914261	0.0133742	0.013963	0.0893673	0.0827149	0.0148643	0.0217821	0.0529665	0.0211547	0.00901498	0.0357035	0.0207686	0.0663273	0.0832554	0.0327359	0.0180213	0.0151598	0.0612685	-8.88e-16	0.0449262	0.0140999	0.0443978	0.057414	0.00794676	0.0318666	0.0229211	0.0253924	0.00289187	0.010851	0.00601351	0.0566321	0.0218307	0.0134482	0.0213503
NFE2L1	0.0617675	0.00296207	0.0607022	0.0452336	0.0520982	0.224463	0.0190235	0.00776596	0.114269	0.0474014	0.016512	0.163605	0.0604659	0.0553523	0.324176	0.0537976	0.0427828	0.0469219	0.0358656	0.00347757	0.200326	0.0428558	0.0563491	0.1782	0.00879387	0.0290858	0.0885916	0.0435181	0.0285894	0.0625089	0.0332347	0.063696	0.189329	0.0232104	0.0260214
NFIC	0.104588	0.00578956	0.062256	0.0588847	0.121896	0.414895	0.0343086	0.01233	0.14789	0.0389753	0.0149686	0.078286	0.0473692	0.110957	0.460944	0.0647697	0.0334147	0.0232682	0.0138064	0.00138579	0.0508861	0.011423	0.0282259	0.0920978	0.0039828	0.0142152	0.0980689	0.0261919	0.020647	0.0290496	0.0140039	0.103418	0.181911	0.0272819	0.0199777
NFIX	0.0677307	0.00168532	0.0587354	0.0681787	0.0198312	0.48432	0.0395975	0.00516837	0.100066	0.0120969	0.0103747	0.0615833	0.0459529	0.0213917	0.570161	0.0633719	0.0144056	0.0133093	0.00390714	0.00089372	0.0257361	0.00672146	0.00759042	0.0885427	0.00319058	0.00378577	0.0600894	0.00758515	0.0153073	0.0308451	0.0121742	0.0132687	0.239046	0.0287272	0.00776998
NFKB2	0.112575	0.00947233	0.0548132	0.0156274	0.104882	0.162644	0.0296753	0.0165343	0.166777	0.0993064	0.0169303	0.0467647	0.020272	0.0975997	0.172026	0.0573432	0.08382	0.089701	0.0944433	0.00427976	0.0671616	0.00855222	0.141735	0.182569	0.00645205	0.0713137	0.12877	0.0802251	0.0225423	0.00745927	0.00410175	0.0881195	0.0520658	0.0185498	0.0439223
NR1D1	0.088147	0.00276471	0.0580519	0.0439023	0.0187545	0.05647	0.0131217	0.0145267	0.223784	0.0108741	0.0186683	0.144792	0.0708979	0.0178203	0.045968	0.0263125	0.043455	0.0708392	0.015114	0.00222751	0.267178	0.0850447	0.0283625	0.0563747	0.00580141	0.0305716	0.235974	0.00823308	0.0129666	0.0216844	0.0468427	0.00892463	0.0122311	0.00592093	0.0155937
NR2C2	0.0646659	0.00651298	0.0715009	0.0691274	0.108216	0.413544	0.0420555	0.0138423	0.102607	0.0437271	0.00895355	0.0831013	0.0530826	0.101735	0.462397	0.0810323	0.0366857	0.0226526	0.0189034	0.001846	0.0519308	0.0125133	0.0418985	0.106995	0.00521223	0.0184454	0.0553773	0.0346723	0.01528	0.0385151	0.0152321	0.0982855	0.180567	0.0343368	0.022737
NR2F1	0.207638	0.00482273	0.203408	0.183758	0.0241924	0.090385	0.0771649	0.0329431	0.289256	0.029788	0.024523	0.166521	0.130306	0.0194055	0.0828486	0.109496	0.10157	0.0545432	0.0250528	0.00442963	0.120641	0.0319681	0.028017	0.0517862	0.00566384	0.0448378	0.159186	0.0229521	0.0326272	0.0695322	0.0544855	0.010567	0.0394259	0.0390118	0.0689377
NR2F2	0.0620484	0.00153049	0.0148388	0.0754654	0.0172179	0.0379782	0.00263255	0.0994056	0.108082	0.0292124	0.012018	0.0248104	0.0690355	0.0181972	0.0436231	0.0325949	0.430137	0.0455034	0.0402157	0.00129189	0.0391676	0.031717	0.0134738	0.0267052	0.0130226	0.216132	0.0650165	0.0290665	0.00973962	0.00532802	0.0174492	0.00643521	0.0202118	0.00996143	0.305324
NR2F6	0.120665	0.0176281	0.0519248	0.0232366	0.036333	0.114749	0.0200112	0.0179931	0.211955	0.11573	0.0250933	0.101043	0.0400244	0.038452	0.141253	0.0525488	0.134127	0.0781186	0.071535	0.00226769	0.169688	0.0433282	0.0383947	0.1087	0.00654501	0.0800369	0.144394	0.0661974	0.0240115	0.0149265	0.0112646	0.0371278	0.0546879	0.0211716	0.0595777
NR3C1	0.0749533	0.00699189	0.0868684	0.0818423	0.105348	0.38778	0.0487829	0.0138383	0.118641	0.0481089	0.0111796	0.105521	0.0613703	0.102276	0.448277	0.0893798	0.0432666	0.0175093	0.0172627	0.00123642	0.0716327	0.0148456	0.0249109	0.0949012	0.0059203	0.0173659	0.0643719	0.0345835	0.0169241	0.045053	0.019417	0.102789	0.185969	0.040431	0.0252631
NRF1	0.0975409	0.00562922	0.0921313	0.0908074	0.105097	0.403384	0.0491399	0.0119097	0.145826	0.0384126	0.016208	0.105671	0.0697301	0.0958789	0.443307	0.0909451	0.032489	0.0212896	0.0133362	0.00181166	0.0547171	0.0132112	0.0288729	0.0838508	0.00479629	0.0124688	0.0817613	0.0259828	0.0265806	0.0561131	0.0236127	0.0941088	0.17235	0.0378201	0.0193363
ONECUT1	0.0770744	0.00017138	0.13016	0.128999	0.00684571	0.087948	0.260892	0.0108043	0.120701	0.00077074	0.00511341	0.139093	0.108311	0.00839068	0.0742035	0.373366	0.0158713	0.0145235	0.00097259	0.00064054	0.0763787	0.0222956	0.00231819	0.0236036	0.017262	0.00495055	0.0730123	0.00033387	0.012755	0.11051	0.0378702	0.0075711	0.0230675	0.207131	0.0062364
ONECUT2	0.0678278	0.0024191	0.352568	0.190245	0.0274554	0.165486	0.0901733	0.00760315	0.106246	0.0158484	0.00902969	0.30958	0.148167	0.0220812	0.184106	0.143695	0.0129762	0.0219335	0.0137508	0.00126521	0.196969	0.0281508	0.0324587	0.063035	0.00737614	0.011136	0.0533116	0.00868886	0.0172681	0.133773	0.0636994	0.0118282	0.050375	0.0564922	0.00701494
ONECUT3	0.0110441	0	0.0222082	0.0421486	0.0260268	0.0190896	0.0353778	-4.44e-16	0.00842162	0.00029282	0.0143724	0.126582	0.04788	0.0251444	0.0191916	0.0529548	0.0011505	-1.33e-15	0.00328487	0	0.0283875	0.00596502	1.78e-15	0.0136063	0.00073979	0.0032382	0.0140226	-1.11e-15	0.0102188	0.189543	0.031496	0.0402988	0.0233168	0.0467986	0.00116928
OVOL2	0.0277249	0.00600993	0.0654739	0.048875	0.145943	0.0552808	0.0209848	0.0150469	0.0444809	0.0511615	0.00612519	0.077801	0.0461945	0.14785	0.0542262	0.0264455	0.0321425	0.01021	0.0210507	0.00189324	0.0556528	0.0280731	0.037492	0.0245399	0.00084492	0.00608784	0.0360468	0.0323145	0.0102267	0.0474629	0.0266618	0.143471	0.022348	0.00781318	0.0108407
PAX3	0.0556924	0.00338146	0.15019	0.125183	0.0232214	0.216135	0.17476	0.00783896	0.0957109	0.0272954	0.00783896	0.156325	0.0950838	0.0241287	0.284593	0.294718	0.0293879	0.0225078	0.013748	0.00141633	0.0739802	0.021398	0.0233208	0.0717922	0.0150819	0.0137256	0.0992105	0.0152661	0.0216636	0.0930125	0.0452892	0.018771	0.136708	0.179994	0.0147028
POLR2A	0.0712385	0.00471286	0.0534293	0.0361365	0.0910642	0.27343	0.0284078	0.011948	0.13691	0.0710069	0.00781169	0.0927311	0.0421564	0.0969061	0.352344	0.0746346	0.061109	0.0449998	0.049119	0.00223318	0.0932477	0.0207503	0.0917752	0.175889	0.00767209	0.0415833	0.085605	0.0530786	0.0116254	0.0294043	0.0177079	0.092062	0.124863	0.0287882	0.0353014
POLR3A	0.0877264	0.0069804	0.0347948	0.0664642	0.0785733	0.270275	0.029426	0.0142897	0.125051	0.0312484	0.00875656	0.0489583	0.0566353	0.0681526	0.290029	0.0615878	0.0237252	0.0177714	0.0164472	0.00025541	0.0388307	0.0170591	0.0183328	0.076396	0.00594921	0.0157492	0.0733835	0.0200912	0.0110067	0.0233251	0.0109245	0.0647142	0.135664	0.0248037	0.0130859
POLR3G	0.0462972	0.00324277	0.0678064	0.0742481	0.0390254	0.408722	0.0218566	0.00641089	0.0738085	0.0202361	0.0150954	0.0771156	0.0573369	0.0410859	0.527002	0.044235	0.012008	0.0108531	0.00638456	0.00223251	0.0383166	0.0133772	0.00841867	0.097419	0.00354413	0.00483018	0.043088	0.0115379	0.0217798	0.0328401	0.015732	0.0300543	0.253028	0.0146489	0.00662609
POU4F2	0.00814091	7.73e-05	0.0316412	0.0801429	0.00239929	0.0171355	0.0951864	0.00026668	0.0171342	0.00462647	0.124521	0.228926	0.0891998	0.00428014	0.0199461	0.10908	0.000976	0.00745724	0.00018495	0.0102518	0.0350244	0.00983053	0.00268697	0.0110586	0.0020895	0.00310338	0.0150237	0.0005269	0.177134	0.376361	0.082956	0.00346333	0.0210173	0.0440242	0.00084212
PPARA	0.134033	0.0043956	0.0254161	0.0450878	0.109037	0.37576	0.0546275	0.0111154	0.193232	0.0241337	0.0145165	0.0397358	0.0306214	0.0946477	0.425122	0.0821839	0.0254456	0.0235517	0.00878294	0.00075651	0.0197519	0.00614659	0.019733	0.0620731	0.00412132	0.0091564	0.135636	0.0164963	0.0215503	0.0215361	0.00670416	0.0939074	0.185369	0.0401342	0.016794
PRKAA2	0.0554886	0.0043098	0.126788	0.117882	0.0416671	0.169249	0.0386113	0.0106111	0.110856	0.045323	0.0122127	0.160336	0.113393	0.0481609	0.221836	0.105485	0.022174	0.0262645	0.0149379	0.00261876	0.118164	0.0231908	0.0344735	0.0675135	0.00745941	0.011729	0.0478965	0.0292029	0.0193481	0.0471729	0.0218486	0.0390672	0.0795158	0.0380163	0.00894109
PROX2	0.0482723	2.22e-16	0.0287823	0.0145287	0.173951	0.153288	0.00494997	0.00642412	0.0873956	0.00345931	4.44e-16	0.0303649	0.0232294	0.142873	0.0801958	0.0119749	0.0114209	0.0289295	0.0174087	1.11e-16	0.0187481	0.00237296	0.0880004	0.0415999	3.33e-16	0.0123606	0.0587358	0.00544037	0.0003519	0.0135186	0.019976	0.122395	0.0358944	0.00335227	0.0148124
RARG	0.152482	0.00531613	0.0559761	0.0766488	0.0718173	0.191814	0.092715	0.0140155	0.229915	0.0349444	0.0270709	0.0784386	0.06461	0.0674833	0.201968	0.133698	0.0394793	0.0548515	0.0396898	0.00405832	0.0740462	0.0181709	0.0637677	0.115789	0.00687859	0.0307612	0.144044	0.028761	0.0472207	0.0234499	0.0153687	0.0530682	0.0671956	0.0691819	0.0180156
REL	0.0939756	0.00601778	0.0613894	0.0422246	0.27644	0.22974	0.0303398	0.0129381	0.132403	0.0441227	0.0139808	0.0810112	0.0431507	0.27661	0.269566	0.059813	0.036007	0.030518	0.0228397	0.00152614	0.0563095	0.00933072	0.0964409	0.0834578	0.00512615	0.0202354	0.0724869	0.0330632	0.0209207	0.040599	0.0207593	0.2962	0.105747	0.0256701	0.0216573
RELA	0.0844565	0.0052114	0.0547809	0.0228452	0.0591363	0.416075	0.0325245	0.00926768	0.121535	0.0328058	0.016951	0.0279256	0.0120978	0.0590955	0.368533	0.0463058	0.0371031	0.0360724	0.0337393	0.00206981	0.028697	0.00494444	0.0214036	0.123759	0.00321522	0.0234692	0.0942415	0.0567119	0.0253764	0.00773413	0.00587116	0.0829296	0.243858	0.0231821	0.0349284
RELB	0.0868516	0.0102551	0.0646602	0.0332176	0.188748	0.255498	0.0505143	0.022499	0.128603	0.067337	0.0148826	0.0703377	0.0393197	0.181372	0.266474	0.092957	0.0566031	0.0398898	0.0499208	0.00219449	0.0536736	0.0119654	0.109093	0.0992988	0.00528724	0.0471945	0.0734642	0.0514892	0.0215245	0.0374076	0.016407	0.171068	0.113364	0.0365433	0.0336937
RFX1	0.0789805	0.00611012	0.117039	0.103827	0.126106	0.270085	0.0555673	0.0173201	0.128638	0.0466206	0.0302968	0.114373	0.0827539	0.108311	0.274764	0.10178	0.0607185	0.0261286	0.0180288	0.00167927	0.093848	0.0251557	0.0245872	0.0693619	0.0081356	0.0199811	0.062279	0.0283776	0.029746	0.0354823	0.0182943	0.0986034	0.0936454	0.0328167	0.0252582
RFX2	0.216875	0.00440211	0.0974309	0.0977573	0.057671	0.260335	0.0487517	0.0116281	0.324153	0.0331334	0.0814736	0.110026	0.0727086	0.053504	0.297599	0.0868468	0.0323604	0.0471351	0.0158825	0.00983731	0.0531884	0.0129269	0.0293255	0.0674874	0.00412813	0.0140978	0.225934	0.0212564	0.116874	0.056584	0.0230216	0.0485062	0.12031	0.0376969	0.0183736
RFX3	0.120021	0.00553182	0.123324	0.116904	0.0794483	0.34172	0.0627939	0.0113118	0.178846	0.0394938	0.0672608	0.129953	0.0842489	0.0744919	0.389319	0.10628	0.032935	0.0252643	0.0136709	0.00826227	0.0610591	0.0148918	0.0249829	0.0712372	0.00468382	0.0122738	0.106487	0.0266124	0.098159	0.0699077	0.0281102	0.0717291	0.152477	0.0470551	0.0196869
RFX7	0.0778442	0.00654686	0.117639	0.121747	0.0730997	0.322564	0.0628001	0.0120637	0.125767	0.0365916	0.0114229	0.131041	0.0828004	0.072392	0.408942	0.109989	0.0302048	0.0152467	0.00784503	0.00082174	0.0507899	0.0133362	0.0113282	0.0569442	0.00478011	0.00982767	0.0587442	0.0221793	0.0193291	0.073539	0.0264338	0.0693572	0.17476	0.0458758	0.01752
RORA	0.196164	0.0042843	0.194277	0.188662	0.0473568	0.093282	0.104603	0.0111724	0.283548	0.0380683	0.0208916	0.216966	0.140947	0.0449767	0.156312	0.178874	0.0389072	0.0374469	0.0108981	0.00210016	0.110978	0.0275032	0.00888821	0.0268369	0.00828556	0.0138745	0.158289	0.0199491	0.0338658	0.11569	0.0508982	0.0424258	0.0759909	0.0807605	0.0232699
RREB1	0.151307	0.00918245	0.0265703	0.0435451	0.22071	0.20218	0.068836	0.0201139	0.204994	0.0660999	0.0187716	0.0722298	0.0415123	0.218011	0.221269	0.112196	0.0758134	0.0292141	0.0228403	0.00213631	0.0229845	0.00685434	0.0409691	0.0383603	0.00462676	0.0258122	0.136637	0.0490964	0.0318954	0.0521985	0.0214727	0.218948	0.11025	0.055659	0.0485871
RUNX1	0.082514	0.00488498	0.0795261	0.0739327	0.296868	0.248815	0.0450659	0.0106788	0.126538	0.0359502	0.0117156	0.0912383	0.055515	0.283316	0.294049	0.0790191	0.0316093	0.0198627	0.0146874	0.00131749	0.0518023	0.0107989	0.0586845	0.0633802	0.00441337	0.0133685	0.0683954	0.0257541	0.0178894	0.0434483	0.0184551	0.287434	0.122902	0.0354122	0.0195502
RUNX2	0.0308157	0.00240888	0.115637	0.0561829	0.295527	0.187341	0.0305852	0.0129662	0.0441927	0.0130763	0.0147363	0.123664	0.0550126	0.276953	0.228045	0.0475643	0.0173306	0.0165024	0.0149733	0.00336762	0.0499448	0.00779751	0.0605055	0.0712593	0.00347428	0.0108876	0.0274222	0.00545445	0.0251674	0.0673297	0.035289	0.293452	0.0885023	0.0191986	0.00957492
RUNX3	0.0860069	0.00872635	0.0843431	0.0620748	0.220673	0.24311	0.0354876	0.0209782	0.106114	0.0607935	0.0219336	0.0754987	0.0463115	0.188354	0.235343	0.0618645	0.0599851	0.0496767	0.0525024	0.00378031	0.0712555	0.0106724	0.137685	0.162027	0.00385394	0.0415081	0.049043	0.0459153	0.0217434	0.0219235	0.00796875	0.173578	0.0608582	0.0183382	0.0359418
RXRA	0.122454	0.0110181	0.0184365	0.150089	0.0617922	0.106027	0.198586	0.0183573	0.186778	0.0546149	0.00971483	0.0324992	0.0940072	0.0845907	0.132122	0.300941	0.0338026	0.0239534	0.0109853	0.00150933	0.00704831	0.0141691	0.00550892	0.0480833	0.0159321	0.00993106	0.144448	0.0353327	0.0263375	0.0149942	0.00668481	0.0861917	0.0893398	0.17725	0.0245915
SMARCA1	0.1021	0.0112593	0.0650004	0.0903271	0.0645512	0.218185	0.0809811	0.0174851	0.154739	0.0339269	0.018402	0.100476	0.0684073	0.0517437	0.20873	0.135466	0.0587657	0.0323903	0.0118454	0.00331749	0.0592813	0.0210515	0.0185492	0.0573881	0.00710733	0.0262585	0.136167	0.0326063	0.038771	0.0567485	0.0204501	0.0593678	0.0935214	0.0539235	0.0405085
SOX10	0.0433383	0.0022676	0.043807	0.0457318	0.0320245	0.490745	0.0546157	0.00417343	0.065395	0.0142127	0.00460708	0.049492	0.0331086	0.0338247	0.585302	0.0893487	0.0130986	0.0103573	0.00512975	0.00051786	0.0228269	0.0058881	0.00998453	0.102071	0.00460294	0.00458255	0.0330961	0.0101427	0.00750796	0.0248467	0.0101989	0.0265291	0.254349	0.042187	0.00717922
SOX4	0.0602041	0.0034909	0.137436	0.157557	0.030095	0.108695	0.223213	0.00955863	0.0921782	0.0251463	0.0186538	0.177701	0.123669	0.0430089	0.096957	0.366738	0.0408367	0.0247402	0.0102795	0.00492557	0.0825778	0.0280355	0.0234113	0.0410909	0.023662	0.0156438	0.0717213	0.020363	0.034146	0.0974238	0.0595051	0.0436478	0.0371157	0.195668	0.0267227
SOX8	0.0456665	0.00134579	0.0361592	0.0297617	0.0192393	0.43214	0.0592527	0.00288927	0.0754503	0.0103166	0.00445039	0.0488338	0.0263494	0.0251542	0.59112	0.109085	0.0139177	0.0182848	0.00899267	0.0009232	0.0360508	0.00808333	0.0199285	0.179571	0.00819635	0.00798252	0.0403864	0.00762862	0.00807423	0.0215708	0.00855797	0.0124256	0.241105	0.0502654	0.00620338
SP1	0.0674151	0.00775613	0.0193591	0.024028	0.125363	0.309903	0.0148924	0.0165008	0.0922221	0.0405073	0.00697896	0.0303998	0.0199205	0.104308	0.30904	0.0329487	0.0425454	0.0147576	0.0177845	0.00128619	0.0197113	0.00558278	0.0284502	0.076227	0.00333277	0.0154321	0.0862064	0.0322637	0.01894	0.015444	0.00855526	0.135338	0.17163	0.0152435	0.030366
SP5	0.0531168	0.00730412	0.0608182	0.0453103	0.0575697	0.12799	0.0220255	0.0112027	0.0846546	0.0313177	0.00476416	0.159418	0.0753415	0.0640936	0.0995195	0.0440895	0.0178984	0.0605886	0.0514481	0.00148273	0.144603	0.0508882	0.121239	0.14567	0.00824794	0.0393985	0.046096	0.0192902	0.0104618	0.0564625	0.0527812	0.0408911	0.0165291	0.0111705	0.0150245
SPI1	0.0751688	0.00589195	0.0533116	0.0431145	0.281857	0.254573	0.0363767	0.0103447	0.124144	0.0512089	0.0110787	0.0672798	0.0374667	0.271965	0.301717	0.0713512	0.0400789	0.029924	0.0328266	0.00191725	0.0546514	0.0108554	0.116359	0.103005	0.00523716	0.0286472	0.0685952	0.0391856	0.0155287	0.0241534	0.011262	0.29081	0.109453	0.0276663	0.0224356
SREBF2	0.0780503	0.00426967	0.0793237	0.0808246	0.064132	0.45707	0.0470669	0.00843656	0.110802	0.028209	0.010361	0.0939634	0.0603261	0.0595574	0.516599	0.079388	0.0237889	0.0145182	0.00924603	0.00087632	0.0423386	0.0106271	0.0160088	0.0827916	0.00389577	0.00849136	0.0590015	0.0186536	0.0146535	0.0468757	0.0192575	0.050733	0.203101	0.0343495	0.012971
SRF	0.0689559	0.0213089	0.0234677	0.0328112	0.0469987	0.0549849	0.0203952	0.0163982	0.123637	0.124607	0.0515169	0.0840096	0.0285403	0.0511202	0.053665	0.0543133	0.169075	0.0660511	0.100028	0.0127033	0.129372	0.0380986	0.0783496	0.0636395	0.00571442	0.106883	0.0732436	0.0685212	0.0446269	0.0305807	0.0122844	0.0583411	0.015013	0.0276981	0.0677047
STAT1	0.0866843	0.0164043	0.086107	0.0769244	0.201042	0.246026	0.0538087	0.0162002	0.132074	0.134522	0.0116476	0.0939591	0.060966	0.1909	0.274262	0.106446	0.0676136	0.0323214	0.0527807	0.0018263	0.0542105	0.0115628	0.0783172	0.0788239	0.00525227	0.0375329	0.072732	0.118537	0.0164456	0.0415328	0.0177159	0.171954	0.10148	0.0500129	0.0439159
STAT3	0.125999	0.00900572	0.0432493	0.0457818	0.158634	0.376363	0.0522755	0.0195629	0.164825	0.0581348	0.014942	0.0553214	0.0367933	0.132155	0.385646	0.0879155	0.0574841	0.0264917	0.0254744	0.00132361	0.0329714	0.0077856	0.0361366	0.0843444	0.00437652	0.0229462	0.111094	0.0459021	0.0197222	0.0241079	0.0118591	0.149318	0.172207	0.0453448	0.0381214
STAT6	0.108442	0.0134471	0.0499453	0.0408445	0.332574	0.186187	0.0301513	0.018941	0.153449	0.0908624	0.0126497	0.0710152	0.0352696	0.294003	0.196361	0.0543041	0.068212	0.0275657	0.0347224	0.00172998	0.0351498	0.0086345	0.0736019	0.0510824	0.00316171	0.0278644	0.0763917	0.0653442	0.0158956	0.0417124	0.0174808	0.301196	0.0613031	0.0220028	0.0412258
TAF1	0.0872968	0.00629279	0.0699072	0.0687611	0.117455	0.43223	0.0444591	0.0130443	0.127738	0.040869	0.0115043	0.0826022	0.0541418	0.107992	0.475061	0.0818186	0.0327656	0.019616	0.0154885	0.00099561	0.0447327	0.0105857	0.0334483	0.0958225	0.00498597	0.0138805	0.0636867	0.0277602	0.0174564	0.035919	0.0159546	0.0935577	0.168391	0.0320508	0.0188083
TAL1	0.0778179	0.00951376	0.0543164	0.0602458	0.323806	0.214516	0.0425304	0.0109544	0.118676	0.0668993	0.00980245	0.0720987	0.0456013	0.315183	0.252215	0.0795585	0.0396588	0.0180235	0.0262951	0.00116387	0.0364707	0.00772037	0.0694036	0.047566	0.00365095	0.0195565	0.0686198	0.053629	0.0174478	0.04313	0.0183649	0.314089	0.0972327	0.0342767	0.0262088
TBX15	0.0877667	0.00594646	0.124216	0.123616	0.0173644	0.193692	0.0438078	0.0623295	0.136491	0.0552526	0.0136499	0.150217	0.0956687	0.016304	0.199781	0.0748505	0.260331	0.0300531	0.0321636	0.00193984	0.05802	0.0111297	0.0305107	0.0764398	0.00334181	0.0990939	0.0821956	0.0398992	0.0128989	0.0929758	0.0351977	0.0108106	0.044989	0.0316458	0.175449
TCF7L1	0.265191	0.00788966	0.0980871	0.0967146	0.0543422	0.193219	0.0631788	0.0161495	0.389068	0.056918	0.0350344	0.112089	0.0695674	0.0497458	0.214075	0.107441	0.0551229	0.0565847	0.0231606	0.00404322	0.0538601	0.0125923	0.0247699	0.0542913	0.00463855	0.0220092	0.262041	0.0395135	0.0525286	0.0586142	0.022551	0.0457107	0.0853125	0.0464646	0.0333644
TEAD1	0.183144	0.00944681	0.0826417	0.0901982	0.042564	0.343182	0.0663535	0.016487	0.255849	0.0624234	0.0285123	0.0926123	0.0651218	0.0392176	0.372593	0.113527	0.0477997	0.0363518	0.022622	0.00317641	0.0451785	0.0128159	0.0201808	0.0752762	0.00487372	0.0176893	0.161853	0.0433133	0.04134	0.0423557	0.0182127	0.0301795	0.14805	0.051279	0.0288875
TEAD3	0.112997	0.00192062	0.0524926	0.0228745	0.0204164	0.157906	0.0174167	0.0434116	0.197658	0.0233512	0.0132872	0.0527987	0.0249515	0.0219149	0.153725	0.0572816	0.14367	0.0517757	0.00891215	0.00183421	0.0650431	0.012224	0.0176079	0.0573202	0.00447609	0.0447997	0.0852506	0.018983	0.0169005	0.0140807	0.00107473	0.0177159	0.0184228	0.0454727	0.10974
TEAD4	0.0919513	0.0445235	0.0636656	0.0552166	0.0851941	0.225587	0.0325422	0.0245784	0.134274	0.297279	0.0167725	0.0666765	0.0414608	0.0799733	0.238791	0.0681831	0.142844	0.0386405	0.119464	0.00249399	0.0448309	0.0106455	0.049149	0.0860012	0.00496945	0.0705186	0.0840416	0.225286	0.0209288	0.0265153	0.0109616	0.0737297	0.0850502	0.0253445	0.0836985
TFAP2C	0.0589593	0.0136167	0.044426	0.00898709	0.0348325	0.0725384	0.00724946	0.00692139	0.120219	0.0206577	0.00184931	0.034459	0.0125394	0.0345271	0.0526169	0.0313746	0.0240113	0.109456	0.0535834	0.0191749	0.0806056	0.035517	0.132421	0.110511	0.00379252	0.0368584	0.0623741	0.00445477	0.00546695	0.00266256	0.0106263	0.0141787	0.0161937	0.0050051	0.00157885
TFCP2L1	0.0792189	0.01159	0.0292684	0.011328	0.15976	0.0450402	0.0426357	0.0267324	0.194182	0.0596402	0.0139239	0.0498655	0.0317531	0.147654	0.0529043	0.0662315	0.0475511	0.0277952	0.0177602	0.00046668	0.051919	0.0155797	0.0364792	0.0210789	0.0084277	0.0225056	0.17205	0.0413364	0.0137276	0.014419	0.0260325	0.15268	0.0264494	0.0550522	0.0325937
TFE3	0.167846	0.009189	0.0333132	0.0207227	0.0852339	0.133685	0.0253473	0.012087	0.276998	0.0839186	0.0190436	0.066958	0.0262714	0.0921627	0.17597	0.06112	0.0575563	0.0588747	0.0609738	0.00280156	0.0785092	0.0196876	0.0541903	0.0984108	0.0056642	0.0436145	0.20209	0.0619297	0.0204498	0.0153059	0.00776011	0.0942229	0.0873978	0.0207112	0.0339331
TP53	0.190527	0.00378472	0.0413144	0.0193878	0.0819757	0.240892	0.0309052	0.0118473	0.309488	0.0375343	0.016644	0.0359234	0.0237411	0.0714416	0.222961	0.0602833	0.0292097	0.0604146	0.0322597	0.00421534	0.0465027	0.0104875	0.0677632	0.107613	0.00526979	0.0252254	0.18809	0.0248802	0.0236416	0.00698	0.00430014	0.0580067	0.0970473	0.0223926	0.0185516
TP63	0.0584107	0.0137639	0.0471165	0.061204	0.090134	0.134625	0.0165829	0.0487215	0.0723431	0.101021	0.0458701	0.0755032	0.0451065	0.0873485	0.135236	0.037918	0.150868	0.0354479	0.0341496	0.0063731	0.0609535	0.00603669	0.072712	0.0585224	0.00351552	0.0649087	0.0623545	0.0718801	0.049861	0.0355665	0.0201796	0.095733	0.085651	0.0163174	0.114142
USF2	0.0791167	0.00443184	0.0472201	0.0339259	0.128146	0.255192	0.0250679	0.00966944	0.126223	0.0610036	0.0148706	0.101031	0.0454396	0.129179	0.346655	0.0627901	0.0524086	0.0277918	0.0319991	0.00183332	0.106448	0.0205601	0.0465328	0.129507	0.00596036	0.0282528	0.0925613	0.0479641	0.0198587	0.0263059	0.019897	0.143689	0.213362	0.0266276	0.0302332
YY1	0.0692394	0.00570477	0.0550229	0.0456835	0.0969995	0.38298	0.0324149	0.0127274	0.109096	0.05141	0.013102	0.0959879	0.0461055	0.0891713	0.436158	0.0722601	0.0470916	0.033038	0.0330356	0.00256364	0.0987333	0.0229483	0.0547695	0.161672	0.00682166	0.0292383	0.0636904	0.0449844	0.0195915	0.0314296	0.0168743	0.0914698	0.190164	0.030979	0.0310749
ZBTB32	0.0466675	0.00159396	0.256379	0.215646	0.0103906	0.0716163	0.0382244	0.00396113	0.0685785	0.00304416	0.0702387	0.258554	0.141876	0.00888333	0.0752764	0.0778127	0.00725065	0.0118837	0.00511233	0.0065409	0.135724	0.0205888	0.00490384	0.022564	0.00520321	0.00312245	0.0453612	0.00452493	0.105903	0.108328	0.0542811	0.00805273	0.035069	0.0176064	0.00392953
ZBTB33	0.0324552	0.00243377	0.0351503	0.0196679	0.0265587	0.0607229	0.00571508	0.00474257	0.0430878	0.00944307	0.0019986	0.0850295	0.0297638	0.0263422	0.148516	0.0142664	0.0148373	0.0503204	0.0197489	0.00286951	0.20366	0.0659411	0.0314528	0.162575	0.0119103	0.0276863	0.0411238	0.0133564	0.0089978	0.0332434	0.0127096	0.0171951	0.0991779	0.0114743	0.00516763
ZBTB7A	0.0698498	0.00224667	0.0588343	0.0478283	0.065971	0.384118	0.0303694	0.00730885	0.0808484	0.0153052	0.00608254	0.0992554	0.048189	0.0543999	0.444708	0.0540846	0.0184509	0.0259332	0.012768	0.00091635	0.0980154	0.0218199	0.017731	0.137187	0.00416236	0.0103729	0.0740266	0.0129289	0.00634323	0.0356434	0.0217654	0.0380215	0.204556	0.0198063	0.0110864
ZFP30	0.0857645	0.00371916	0.0838554	0.09194	0.0575377	0.404879	0.0437702	0.0107931	0.106764	0.0222104	0.0108159	0.099816	0.0648287	0.0529045	0.429703	0.0761431	0.0201836	0.0144084	0.00793401	0.00116491	0.0458375	0.00982587	0.0180273	0.0652408	0.00511781	0.00827058	0.0536951	0.0158788	0.0222744	0.0653828	0.0223602	0.0519107	0.219842	0.0348908	0.0112923
ZMAT4	0.0609602	0.00201974	0.278324	0.27067	0.0326453	0.177698	0.0964223	0.00564081	0.0972593	0.012618	0.0104476	0.286527	0.197453	0.0308246	0.223303	0.161895	0.0156064	0.0129401	0.00489291	0.00133486	0.154024	0.0426194	0.00996941	0.038055	0.00773163	0.00536934	0.0505817	0.00788166	0.0159705	0.157576	0.0703266	0.0256723	0.0886339	0.0712065	0.00878408
ZNF2	0.0786945	0.00186803	0.127805	0.112275	0.101244	0.3301	0.0407396	0.0091711	0.0957833	0.0183856	0.0108772	0.140322	0.0852307	0.0885454	0.392851	0.0729391	0.0173915	0.00796558	0.00470948	0.00073818	0.0624014	0.0128743	0.010972	0.0566441	0.002411	0.00599167	0.0545266	0.0119515	0.0152533	0.0677129	0.0285168	0.0799286	0.172381	0.0317038	0.0117868
ZNF248	0.10499	0.00308732	0.124146	0.112741	0.049865	0.389396	0.0485521	0.00861461	0.159516	0.0159194	0.0205911	0.13596	0.0845155	0.0496422	0.456862	0.0839243	0.0190447	0.0226148	0.00940831	0.00222561	0.0575724	0.0146397	0.0240318	0.0878427	0.00379496	0.0081666	0.0809049	0.00939168	0.0283963	0.0768289	0.0282698	0.0349172	0.169324	0.0356236	0.0102697
ZNF274	0.0768199	0.00542593	0.0429519	0.0500701	0.0708223	0.488709	0.0337503	0.0103697	0.105948	0.0203616	0.00997977	0.0340106	0.0341493	0.0618362	0.480793	0.0578227	0.0207062	0.0155473	0.00774128	0.00139727	0.020903	0.00712205	0.0156685	0.0854885	0.0047121	0.0065094	0.0474081	0.0110948	0.0154178	0.0173577	0.00697055	0.0489252	0.137476	0.0190031	0.0122235
ZNF382	0.0497762	0.00207817	0.0484585	0.03984	0.0357582	0.159627	0.0233632	0.00774186	0.101421	0.0205979	0.0071488	0.0662178	0.0497066	0.0350064	0.190344	0.0530118	0.0214971	0.0135484	0.00384721	2.22e-16	0.0683324	0.025051	0.0214802	0.0569835	0.00657857	0.0117325	0.0497691	0.00743098	0.0106502	0.0445469	0.0217857	0.0310972	0.0859132	0.0267376	0.00935013
ZNF467	0.0342871	2.12e-05	0.0248123	0.0123053	0.0991129	0.0627444	0.013228	0.0226199	0.0269381	0.018882	0.00293609	0.0247935	0.0165307	0.0941159	0.0362437	0.0164763	0.0909713	0.0333456	0.0480949	0.00055134	0.0304922	0.0119083	0.276981	0.0834045	0.00111233	0.0506726	0.00893806	0.00445259	-4.44e-16	0.00621412	0.00958984	0.0881538	0.0025177	0.00654856	0.0458001
ZNF565	0.0610746	0.00291032	0.0432841	0.0408404	0.0468822	0.484277	0.0378954	0.00610861	0.0994894	0.0180129	0.00591608	0.0479109	0.0312318	0.0482115	0.547595	0.0687979	0.0181403	0.0187528	0.00915431	0.00099843	0.0253684	0.00611145	0.0166899	0.160496	0.00499213	0.00861544	0.0465673	0.0137301	0.00945656	0.0232433	0.00833564	0.0415145	0.204405	0.0293608	0.010736
ZNF568	0.0723885	0.00397809	0.0302402	0.0228251	0.0599991	0.431638	0.0287486	0.00579582	0.116011	0.0182137	0.0102992	0.040453	0.0230768	0.0573242	0.496595	0.0570967	0.0150206	0.0201747	0.00990987	0.0014922	0.034431	0.00865792	0.0296758	0.116978	0.00627617	0.00830846	0.0503786	0.0117288	0.0144411	0.0135254	0.00614087	0.0428181	0.209977	0.0220041	0.00702374
ZNF600	0.0168275	0.0139592	0.00702985	0.00884196	0.202161	0.140616	0.00917984	0.00342628	0.0305403	0.121646	0.00101875	0.00892784	0.00770249	0.179681	0.12385	0.0198445	0.13078	0.00779055	0.0815944	2.86e-05	0.00834799	0.00057974	0.127658	0.0475376	0.0005903	0.0965242	0.0134292	0.0944307	0.00627979	0.00143273	0.00110256	0.203553	0.0245451	0.00623949	0.0633278
ZNF721	0.0763048	0.00311726	0.100266	0.100626	0.0455078	0.295918	0.0445837	0.00712015	0.126316	0.0264521	0.0140398	0.17879	0.0884154	0.0467437	0.450623	0.0860623	0.0210323	0.0160283	0.00899587	0.00132382	0.056792	0.0138885	0.0185226	0.0708913	0.00383494	0.00740746	0.0796804	0.0201918	0.0233661	0.125793	0.0413648	0.0404325	0.267346	0.0416121	0.0118117
ZNF808	0.047475	0.00725776	0.0248535	0.0418825	0.145328	0.149645	0.0256227	0.0313594	0.0718026	0.0489147	0.0135761	0.0361476	0.0351969	0.14697	0.157103	0.0478739	0.0423562	0.00909311	0.0103264	0.00028925	0.0198897	0.0122823	0.0233153	0.0491011	0.00420583	0.0207708	0.0657505	0.031469	0.0341701	0.0137656	0.0129457	0.157684	0.0886207	0.0246023	0.0270434
ZXDC	0.0932312	0.00510376	0.057071	0.0540338	0.0940155	0.453282	0.0356117	0.0104256	0.129839	0.0349989	0.0117242	0.0581224	0.0403698	0.0878122	0.490629	0.0635298	0.028861	0.0177028	0.011352	0.00154609	0.0316105	0.00740389	0.023556	0.0811738	0.00356211	0.0106819	0.0802331	0.0254817	0.0188039	0.0275595	0.0122271	0.0855383	0.211697	0.0296694	0.0173476
