# Supplementary material for: Integrating single-nucleus sequence profiling to reveal the transcriptional dynamics of Alzheimer’s disease, Parkinson’s disease, and multiple sclerosis
Source: J Transl Med. 2023 Sep 21;21:649. doi: 10.1186/s12967-023-04516-6 (PMC10515258; doi:10.1186/s12967-023-04516-6)
Supplement: Supplementary file 9 — Additional file 9: Table S8. The Cmap results of AD. [file 12967_2023_4516_MOESM9_ESM.xlsx]

## Sheet: AD
Supplementary Table S8. The Cmap results of AD.
id	pert_id	pert_iname	cell_iname	pert_type	pert_idose	pert_itime	nsample	ss_ngene	cc_q75	tas	qc_pass	is_hiq	is_ncs_sig	is_exemplar_sig	is_null_sig	moa	target_name	raw_cs	fdr_q_nlog10	norm_cs
CPC020_HA1E_6H:BRD-A29644307-001-01-7:10	BRD-A29644307	nomifensine	HA1E	trt_cp	10 uM	6 h	3	104	0.11	0.108154	1	0	1	1	0	Dopamine receptor antagonist|Noradrenaline uptake inhibitor	SLC6A2|SLC6A3|DRD2|MAOA|MAOB|MPO	-0.5718	15.6536	-2.2111
CPC014_SKB_24H:BRD-K85985071-001-20-7:10	BRD-K85985071	ellipticine	SKB	trt_cp	10 uM	24 h	4	409	0.56	0.483934	0	0	1	1	0	Topoisomerase inhibitor	TOP2A|TOP2B	-0.5539	15.6536	-2.1418
CPC005_HT29_6H:BRD-A02713983-001-02-0:10	BRD-A02713983	dihydrodeoxygedunin	HT29	trt_cp	10 uM	6 h	2	49	0.21	0.102574	1	0	1	1	0	Growth factor receptor activator	NTRK2	-0.5413	15.6536	-2.0931
NMH001_FIBRNPC_6H:BRD-K70327167-348-11-8:10	BRD-K70327167	suramin	NPC	trt_cp	10 uM	6 h	2	510	0.56	0.540393	0	0	1	1	0	DNA inhibitor	FSHR|P2RY2|RYR1|HPSE|F2|P2RY1|P2RY11|P2RY13|PLA2G2A|RYR2|SIRT5	-0.5339	15.6536	-2.0643
CPC011_HT29_6H:BRD-K99063460-001-08-1:10	BRD-K99063460	didanosine	HT29	trt_cp	10 uM	6 h	4	95	0.11	0.103369	1	0	1	1	0	Nucleoside reverse transcriptase inhibitor	PNP	-0.5288	15.6536	-2.0446
CPC017_ASC_24H:BRD-K43330982-001-01-5:10	BRD-K43330982	JTE-013	ASC	trt_cp	10 uM	24 h	3	458	0.26	0.348939	1	0	1	1	0	Lysophospholipid receptor antagonist	S1PR2|P2RY10	-0.5276	15.6536	-2.0399
CPC018_SKB_24H:BRD-K98530306-003-06-8:10	BRD-K98530306	clonidine	SKB	trt_cp	10 uM	24 h	3	176	0.28	0.224474	1	0	1	1	0	Adrenergic receptor agonist	ADRA2A|ADRA2B|ADRA2C|ADRA1A|ADRA1B|ADRA1D	-0.527	15.6536	-2.0376
CPC014_ASC_24H:BRD-K08115555-001-04-4:10	BRD-K08115555	BRD-K08115555	ASC	trt_cp	10 uM	24 h	3	463	0.08	0.19461	0	0	1	1	0	TNF inhibitor	TNF	-0.5266	15.6536	-2.0363
REP.A011_HA1E_24H:G01	BRD-K05524748	dronedarone	HA1E	trt_cp	10 uM	24 h	3	700	0.7802	0.747279	0	0	1	1	0	Adrenergic receptor antagonist	SLC22A2|SLC22A8|SLCO1B3|ADRA1A|ADRA1B|ADRA1D|ADRA2A|ADRA2B|ADRA2C|ADRB1|CACNA1C|CACNA1D|CACNA1F|CACNA1S|CACNB1|CACNB2|CACNB3|CACNB4|KCNA5|KCNH2|KCNK2|SCN1A	-0.5263	15.6536	-2.035
CPC018_A375_6H:BRD-K08998509-001-01-6:10	BRD-K08998509	fananserin	A375	trt_cp	10 uM	6 h	5	138	0.09	0.112692	0	0	1	1	0	Dopamine receptor antagonist|Serotonin receptor antagonist	HTR2A|DRD4	-0.526	15.6536	-2.0337
CPC014_HCC515_6H:BRD-K04923131-001-06-3:10	BRD-K04923131	BRD-K04923131	HCC515	trt_cp	10 uM	6 h	3	240	0.43	0.324841	1	1	1	1	0	GSK inhibitor|Lipoxygenase inhibitor	GSK3B|ALOX5|GSK3A	-0.521	15.6536	-2.0147
CPC014_SKB_24H:BRD-A80574334-001-01-9:10	BRD-A80574334	oxalomalic-acid	SKB	trt_cp	10 uM	24 h	3	444	0.51	0.48118	0	0	1	1	0	Isocitrate dehydrogenase inhibitor	ACO1|IDH1	-0.52	15.6536	-2.0105
CPC016_SKB_24H:BRD-A64227845-004-02-8:10	BRD-A64227845	SKF-77434	SKB	trt_cp	10 uM	24 h	3	469	0.3	0.379295	0	0	1	1	0	Dopamine receptor agonist	DRD1	-0.5157	15.6536	-1.9942
CPC018_SKB_24H:BRD-K73109821-001-10-2:10	BRD-K73109821	diazoxide	SKB	trt_cp	10 uM	24 h	3	285	0.44	0.358079	0	0	1	1	0	Potassium channel activator	KCNJ11|ATP1A1|CA1|CA2|KCNJ8|KCNMA1|SLC12A3	-0.5084	15.6536	-1.9659
CPC017_HEPG2_6H:BRD-A81177136-001-03-6:10	BRD-A81177136	KN-62	HEPG2	trt_cp	10 uM	6 h	3	239	0.31	0.275239	1	1	1	1	0	Calcium channel blocker|Purinergic receptor antagonist	P2RX7|CAMK2A|AKT1|CHEK1|LCK|MAPK1|MAPK11|MAPK12|MAPK14|MAPK8|PRKCA|ROCK1|RPS6KB1|SGK1	-0.5072	15.6536	-1.9611
REP.B009_THP1_24H:M24	BRD-A33692381	zidovudine	THP1	trt_cp	0.01 uM	24 h	2	106	0.1927	0.144519	0	0	1	1	0	Reverse transcriptase inhibitor	TERT	-0.504	15.6536	-1.9487
MOAR002_PC3_24H:N11	BRD-K58568447	K-02288	PC3	trt_cp	3.33 uM	24 h	3	199	0.37	0.274383	1	1	1	1	0	Bone resorption inhibitor	ABL1|ABL2|ACVR1|ACVRL1|BMPR1A|HCK|LCK|MAP4K4|PTK6|BMP1	-0.4968	15.6536	-1.9208
LPROT004_YAPC_6H:BRD-K87465484:0.5	BRD-K87465484	UNC-0646	YAPC	trt_cp	0.5 uM	6 h	3	150	0.6	0.303355	1	1	1	1	0	Histone lysine methyltransferase inhibitor	EHMT2	-0.4963	15.6536	-1.919
CPC004_HEPG2_6H:BRD-A25687296-300-03-5:10	BRD-A25687296	emetine	HEPG2	trt_cp	10 uM	6 h	3	384	0.66	0.509059	0	0	1	1	0	Protein synthesis inhibitor	RPS2	-0.4958	15.6536	-1.917
CPC017_ASC_24H:BRD-A25687296-300-03-5:10	BRD-A25687296	emetine	ASC	trt_cp	10 uM	24 h	3	535	0.8	0.661534	1	1	1	1	0	Protein synthesis inhibitor	RPS2	-0.4928	15.6536	-1.9054
CPC014_HA1E_6H:BRD-K79437791-001-03-2:10	BRD-K79437791	BRD-K79437791	HA1E	trt_cp	10 uM	6 h	3	64	0.07	0.0676814	1	0	1	1	0	Inhibitor of methylation of endogenous isoprenylated proteins	PPARG	-0.4915	15.6536	-1.9003
CPC004_PC3_6H:BRD-K36055864-001-09-3:10	BRD-K36055864	cycloheximide	PC3	trt_cp	10 uM	6 h	5	448	0.67	0.553996	1	1	1	1	0	Protein synthesis inhibitor	GSK3B|RPL3	-0.491	15.6536	-1.8984
REP.A011_HA1E_24H:D01	BRD-A04553218	BRD-A04553218	HA1E	trt_cp	10 uM	24 h	3	183	0.3579	0.258784	0	0	1	1	0	Histamine receptor antagonist	HRH1|SLC6A2|SLC6A3|SLC6A4	-0.4894	15.6536	-1.8924
CPC003_HCC515_24H:BRD-K72895815-001-01-4:10	BRD-K72895815	SSR-69071	HCC515	trt_cp	10 uM	24 h	3	289	0.46	0.368687	1	0	1	1	0	Leukocyte elastase inhibitor	ELANE	-0.4877	15.6536	-1.8857
REP.B013_JURKAT_24H:P23	BRD-K44353683	nateglinide	JURKAT	trt_cp	0.03 uM	24 h	2	129	0.1258	0.128815	0	0	1	1	0	Insulin secretagogue	ABCC8|KCNJ11|CYP3A4|INS|KCNJ10|PPARG	-0.4861	15.6536	-1.8794
CPC016_HEPG2_6H:BRD-K93658967-001-01-7:10	BRD-K93658967	aloisine	HEPG2	trt_cp	10 uM	6 h	3	333	0.15	0.225995	1	0	1	1	0	CDK inhibitor|CFTR channel agonist|GSK inhibitor	CDK2	-0.486	15.6536	-1.8791
REP.A010_THP1_24H:F01	BRD-A12896037	cisapride	THP1	trt_cp	10 uM	24 h	3	101	0.1405	0.120456	1	0	1	1	0	Serotonin receptor agonist	HTR4|KCNH2|CYP2B6|CYP2C8|CYP3A5|CYP3A7|HTR2A|HTR3A	-0.4843	15.6536	-1.8725
REP.A019_HA1E_24H:D01	BRD-K45168550	SB-756050	HA1E	trt_cp	10 uM	24 h	3	411	0.6046	0.504064	0	0	1	1	0	G protein-coupled receptor agonist	GPBAR1	-0.4833	15.6536	-1.8689
CPC017_ASC_24H:BRD-K13533483-001-03-0:10	BRD-K13533483	cyclosporin-a	ASC	trt_cp	10 uM	24 h	4	203	0.21	0.20878	1	0	1	1	0	Calcineurin inhibitor	PPIA|CYP3A5|CYP3A7|PPID|ABCB11|CAMLG|FPR1|PPIF|PPP3R2|SLC10A1|SLCO1B1|SLCO1B3	-0.4831	15.6536	-1.8681
CPC020_HA1E_6H:BRD-K83636919-001-01-4:10	BRD-K83636919	entacapone	HA1E	trt_cp	10 uM	6 h	3	111	0.16	0.134757	1	0	1	1	0	Catechol O methyltransferase inhibitor	COMT	-0.4827	15.6536	-1.8665
CPC004_HT29_6H:BRD-A25687296-300-03-5:10	BRD-A25687296	emetine	HT29	trt_cp	10 uM	6 h	5	562	0.7	0.634231	0	0	1	1	0	Protein synthesis inhibitor	RPS2	-0.4824	15.6536	-1.8654
CPC016_SKB_24H:BRD-A74667430-001-15-2:10	BRD-A74667430	etodolac	SKB	trt_cp	10 uM	24 h	3	669	0.11	0.274309	0	0	1	1	0	Cyclooxygenase inhibitor	PTGS2|TRPV1|PTGS1|RXRA	-0.4815	15.6536	-1.8618
REP.A007_HA1E_24H:D01	BRD-K43797669	genistein	HA1E	trt_cp	10 uM	24 h	3	291	0.5581	0.407505	1	1	1	1	0	Tyrosine kinase inhibitor	CFTR|ESR2|EGFR|ESR1|ESRRA|ESRRB|ESRRG|NCOA1|NCOA2|PPARG|PTK2B|TOP2A|TRPC5	-0.4814	15.6536	-1.8614
CPC017_SKB_24H:BRD-K54704028-001-01-3:10	BRD-K54704028	BAY-36-7620	SKB	trt_cp	10 uM	24 h	2	324	0.67	0.47113	0	0	1	1	0	Glutamate receptor antagonist	GRM1	-0.4811	15.6536	-1.8602
LPROT004_YAPC_6H:BRD-K26818574:10	BRD-K26818574	BIX-01294	YAPC	trt_cp	10 uM	6 h	3	256	0.69	0.424986	1	1	1	1	0	DNA inhibitor|Histone lysine methyltransferase inhibitor	EHMT2|EHMT1	-0.4805	15.6536	-1.8578
CPC016_ASC_24H:BRD-A00993607-003-15-4:10	BRD-A00993607	alprenolol	ASC	trt_cp	10 uM	24 h	3	155	0.19	0.173529	0	0	1	1	0	Adrenergic receptor antagonist	ADRB1|ADRB2|HTR1A	-0.4803	15.6536	-1.8571
REP.A013_YAPC_24H:E01	BRD-K38436528	imipramine	YAPC	trt_cp	10 uM	24 h	3	114	0.2499	0.170674	1	0	1	1	0	Norepinephrine inhibitor|Serotonin reuptake inhibitor	SLC6A2|SLC6A4|CHRM2|CYP2C19|ADRA1A|ADRA1B|ADRA1D|CHRM1|CHRM3|CHRM4|CHRM5|DRD1|DRD2|DRD5|HRH1|HTR1A|HTR2A|HTR2C|HTR6|HTR7|KCND2|KCND3|KCNH1|KCNH2|SLC6A3	-0.4803	15.6536	-1.8571
PAC003_U2OS_6H:BRD-K36965586-001-01-7:10	BRD-K36965586	m-chlorophenylbiguanide	U2OS	trt_cp	10 uM	6 h	2	100	0.32	0.180886	1	1	1	1	0	Serotonin receptor agonist	HTR3A|HTR3B	-0.4798	15.6536	-1.855
CVD001_HUH7_6H:BRD-K76674262-001-01-7:10	BRD-K76674262	BRD-K76674262	HUH7	trt_cp	10 uM	6 h	3	510	0.77	0.633667	0	0	1	1	0	Protein synthesis inhibitor	RPL3	-0.479	15.6536	-1.852
CPC014_ASC_24H:BRD-A74904029-001-05-7:10	BRD-A74904029	EI-231	ASC	trt_cp	10 uM	24 h	3	546	0.35	0.442039	0	0	1	1	0	Casein kinase inhibitor	CSNK2A1	-0.479	15.6536	-1.852
CPC002_HA1E_24H:BRD-K91370081-001-10-3:10	BRD-K91370081	anisomycin	HA1E	trt_cp	10 uM	24 h	3	719	0.85	0.790505	1	1	1	1	0	DNA inhibitor	RPL10L|RPL11|RPL13A|RPL15|RPL19|RPL23|RPL23A|RPL26L1|RPL3|RPL37|RPL8|RSL24D1|SNU13	-0.4788	15.6536	-1.8514
CPC005_A375_24H:BRD-K43405658-001-01-8:10	BRD-K43405658	BRD-K43405658	A375	trt_cp	10 uM	24 h	3	268	0.46	0.35504	1	1	1	1	0	Protein tyrosine kinase inhibitor	EGFR	-0.4782	15.6536	-1.849
CPC006_NCIH596_6H:BRD-K76205745-237-05-8:160	BRD-K76205745	losartan	NCIH596	trt_cp	150 uM	6 h	2	53	0.04	0.0465584	1	0	1	1	0	Angiotensin receptor antagonist	AGTR1	-0.478	15.6536	-1.8483
CPC016_ASC_24H:BRD-K99621550-003-03-4:10	BRD-K99621550	tubocurarine	ASC	trt_cp	10 uM	24 h	3	210	0.46	0.314282	0	0	1	1	0	Acetylcholine receptor antagonist	CHRNA2|HTR3A|ACHE|HTR3B|KCNN1|KCNN2|KCNN3|ZACN	-0.4777	15.6536	-1.8472
REP.B003_HA1E_24H:D10	BRD-A31811760	miltefosine	HA1E	trt_cp	0.08 uM	24 h	3	136	0.3172	0.210023	1	0	1	1	0	Membrane integrity inhibitor	PLA2G1B	-0.4776	15.6536	-1.8468
PAC005_U2OS_6H:BRD-A74904029-001-04-0:15.6671	BRD-A74904029	EI-231	U2OS	trt_cp	15 uM	6 h	2	407	0.16	0.25804	1	1	1	1	0	Casein kinase inhibitor	CSNK2A1	-0.4775	15.6536	-1.8462
CPC017_ASC_24H:BRD-K95309561-001-15-5:10	BRD-K95309561	dienestrol	ASC	trt_cp	10 uM	24 h	4	473	0.06	0.170348	0	0	1	1	0	Estrogen receptor agonist	ESR1	-0.4773	15.6536	-1.8456
REP.A014_MCF10A_24H:H06	BRD-K59506194	targinine	MCF10A	trt_cp	0.04 uM	24 h	3	157	0.205	0.181408	0	0	1	1	0	Nitric oxide synthase inhibitor	NOS2|NOS3	-0.4771	15.6536	-1.8449
CPC016_SKB_24H:BRD-K53523901-001-02-8:10	BRD-K53523901	arctigenin	SKB	trt_cp	10 uM	24 h	3	176	0.26	0.216308	1	0	1	1	0	MEK inhibitor	ADIPOR1|AHR|CHUK|MAP2K1	-0.4768	15.6536	-1.8434
CPC014_PC3_6H:BRD-K85985071-001-20-7:10	BRD-K85985071	ellipticine	PC3	trt_cp	10 uM	6 h	4	319	0.57	0.431185	1	1	1	1	0	Topoisomerase inhibitor	TOP2A|TOP2B	-0.4766	15.6536	-1.8428
CPC016_ASC_24H:BRD-K37312348-001-06-9:10	BRD-K37312348	kenpaullone	ASC	trt_cp	10 uM	24 h	3	101	0.22	0.150731	1	0	1	1	0	CDK inhibitor|GSK inhibitor	GSK3B|CDK1|CDK5|CDK2|LCK|CCNB1	-0.4754	15.6536	-1.8383
CPC014_A375_6H:E17	BRD-A45498368	WYE-125132	A375	trt_cp	10 uM	6 h	2	211	0.5394	0.341136	1	1	1	1	0	MTOR inhibitor	MTOR|PIK3CA	-0.4752	15.6536	-1.8372
CPC015_ASC_24H:BRD-K38323065-001-09-0:10	BRD-K38323065	phenacetin	ASC	trt_cp	10 uM	24 h	4	371	0.21	0.282246	0	0	1	1	0	Cyclooxygenase inhibitor	PTGS1	-0.4746	15.6536	-1.8351
CPC017_SKB_24H:BRD-K76674262-001-01-7:10	BRD-K76674262	BRD-K76674262	SKB	trt_cp	10 uM	24 h	2	404	0.7	0.537737	0	0	1	1	0	Protein synthesis inhibitor	RPL3	-0.4736	15.6536	-1.8313
PAC002_U2OS_6H:BRD-K41567364-001-01-2:10	BRD-K41567364	SB-334867	U2OS	trt_cp	10 uM	6 h	2	234	0.07	0.129416	0	0	1	1	0	Orexin receptor antagonist	HCRTR1|HCRTR2	-0.4721	15.6536	-1.8256
CPC006_A375_24H:BRD-K33583600-001-09-6:10	BRD-K33583600	BRD-K33583600	A375	trt_cp	10 uM	24 h	5	330	0.38	0.358079	1	1	1	1	0	Guanylate cyclase activator	AKR1B1|HRH2|SIRT1|GABBR1	-0.4717	15.6536	-1.8239
CPC018_ASC_24H:BRD-K09602097-001-04-5:10	BRD-K09602097	forskolin	ASC	trt_cp	10 uM	24 h	3	365	0.38	0.37659	0	0	1	1	0	Adenylyl cyclase activator	ADCY2|ADCY5|GNAS	-0.4714	15.6536	-1.8228
CPC007_HA1E_6H:BRD-K03067624-003-19-3:10	BRD-K03067624	emetine	HA1E	trt_cp	10 uM	6 h	3	559	0.67	0.618834	1	1	1	1	0	Protein synthesis inhibitor	RPS2	-0.4712	15.6536	-1.8221
PAC001_U2OS_6H:BRD-K65146499-001-04-8:8.76093	BRD-K65146499	nabumetone	U2OS	trt_cp	8 uM	6 h	2	73	0.22	0.128145	0	0	1	1	0	Cyclooxygenase inhibitor	PTGS2|AKR1C3|CYP2B6|CYP2C19|CYP2E1|PTGS1	-0.4701	15.6536	-1.8178
REP.B018_PC3_24H:O24	BRD-A67479912	progesterone	PC3	trt_cp	0.01 uM	24 h	2	132	0.2867	0.196712	1	1	1	1	0	Progesterone receptor agonist	PGR|CYP17A1|NR3C2|CYP2C19|CATSPER1|CATSPER2|CATSPER3|CATSPER4|ESR1|OPRK1|TRPC5	-0.4698	15.6536	-1.8166
CPC017_SKB_24H:BRD-K08109516-001-02-9:10	BRD-K08109516	L-701324	SKB	trt_cp	10 uM	24 h	2	260	0.24	0.252594	0	0	1	1	0	Glutamate receptor antagonist	GRIN1|GRIN2A|GRIN2B|GRIN2C|GRIN2D	-0.4688	15.6536	-1.8128
CPC016_SKB_24H:BRD-K88741031-001-01-0:10	BRD-K88741031	BRD-K88741031	SKB	trt_cp	10 uM	24 h	3	191	0.25	0.220962	1	1	1	1	0	Tyrosine kinase inhibitor|EGFR inhibitor	EGFR	-0.4687	15.6536	-1.8124
CPC016_ASC_24H:BRD-K35498378-001-05-3:10	BRD-K35498378	alrestatin	ASC	trt_cp	10 uM	24 h	3	217	0.23	0.225904	1	0	1	1	0	Aldose reductase inhibitor	AKR1B1	-0.4681	15.6536	-1.81
MOAR005_A375_24H:E13	BRD-K11215326	E-7438	A375	trt_cp	10 uM	24 h	3	99	0.27	0.165322	1	1	1	1	0	Histone lysine methyltransferase inhibitor	EZH2	-0.468	15.6536	-1.8094
REP.B023_PC3_24H:A13	BRD-K67966701	lisinopril	PC3	trt_cp	2.22 uM	24 h	2	80	0.1065	0.0933363	0	0	1	1	0	ACE inhibitor	ACE|ACE2	-0.4679	15.6536	-1.809
LJP007_HUVEC_24H:N03	BRD-K09991945	BRD-K09991945	HUVEC	trt_cp	1.11 uM	24 h	3	400	0.3335	0.369325	1	1	1	1	0	PKC inhibitor	GSK3B	-0.4677	15.6536	-1.8085
CPC014_HCC515_6H:BRD-K48722833-001-01-9:10	BRD-K48722833	iloperidone	HCC515	trt_cp	10 uM	6 h	3	225	0.38	0.295674	1	1	1	1	0	Dopamine receptor antagonist|Serotonin receptor antagonist	DRD2|HTR2A|HTR1A|HTR6|HTR7|ADRA1A|ADRA2C|DRD1|DRD3|DRD4|HRH1	-0.4674	15.6536	-1.8073
CPC017_ASC_24H:BRD-K50422030-003-01-8:10	BRD-K50422030	clomethiazole	ASC	trt_cp	10 uM	24 h	4	222	0.07	0.126054	1	0	1	1	0	GABA receptor antagonist|GABA receptor modulator	GABRA1	-0.4673	15.6536	-1.8069
CPC018_ASC_24H:BRD-A56987319-001-02-0:10	BRD-A56987319	SQ-22536	ASC	trt_cp	10 uM	24 h	3	196	0.09	0.134301	0	0	1	1	0	Adenylyl cyclase inhibitor	ADCY5|ADCY1	-0.467	15.6536	-1.8057
REP.A012_HA1E_24H:C01	BRD-K00494077	trovafloxacin	HA1E	trt_cp	10 uM	24 h	3	464	0.661	0.560003	1	1	1	1	0	Bacterial DNA inhibitor	TOP2A	-0.4663	15.6536	-1.8029
CPC018_MCF7_24H:BRD-K56596464-004-05-7:10	BRD-K56596464	QX-314	MCF7	trt_cp	10 uM	24 h	4	119	0.12	0.120836	1	0	1	1	0	Sodium channel inhibitor	MAPK14|TGFBR1	-0.4662	15.6536	-1.8026
CPC018_SKB_24H:BRD-A34255068-001-16-2:10	BRD-A34255068	rolipram	SKB	trt_cp	10 uM	24 h	3	294	0.23	0.262947	0	0	1	1	0	Phosphodiesterase inhibitor	PDE4A|PDE4B|PDE4D|PDE4C	-0.4657	15.6536	-1.8007
CPC018_MCF7_24H:BRD-A36267905-003-12-7:10	BRD-A36267905	buphenine	MCF7	trt_cp	10 uM	24 h	4	243	0.16	0.199386	1	0	1	1	0	Adrenergic receptor agonist	ADRB2	-0.4648	15.3525	-1.797
POL001_HEPG2_24H:H10	BRD-K69023402	thapsigargin	HEPG2	trt_cp	0.37 uM	24 h	3	564	0.85	0.700131	1	1	1	1	0	ATPase inhibitor	ATP2A1	-0.4646	15.3525	-1.7964
NMH001_FIBRNPC_6H:BRD-K67097529-001-01-1:10	BRD-K67097529	SR-12813	NPC	trt_cp	10 uM	6 h	2	284	0.51	0.384835	0	0	1	1	0	FXR agonist	NR1I2	-0.4636	15.3525	-1.7927
CPC018_SKB_24H:BRD-K87158025-003-01-2:10	BRD-K87158025	benzamil	SKB	trt_cp	10 uM	24 h	3	566	0.41	0.487114	0	0	1	1	0	Sodium channel inhibitor	PKD2L1|SCNN1A|SCNN1B|SCNN1G|ASIC1|SCNN1D|SLC8A1	-0.4635	15.3525	-1.792
CPC015_SKB_24H:BRD-K59632282-052-02-3:10	BRD-K59632282	quinidine	SKB	trt_cp	10 uM	24 h	2	136	0.25	0.186453	0	0	1	1	0	Sodium channel inhibitor	SCN5A|ABCB1|CYP2D6|KCNA5|KCNA7|KCNH1|KCNH2|KCNH5|KCNK1|KCNK6|SLC29A4	-0.4629	15.3525	-1.7897
CPC017_ASC_24H:BRD-A06784547-001-01-8:10	BRD-A06784547	MRS-1334	ASC	trt_cp	10 uM	24 h	4	392	0.09	0.189931	0	0	1	1	0	Adenosine receptor antagonist	ADORA3	-0.4626	15.3525	-1.7889
PAC002_U2OS_6H:BRD-K53061490-003-03-0:7.55551	BRD-K53061490	ozagrel	U2OS	trt_cp	8 uM	6 h	2	45	0.09	0.0643514	0	0	1	1	0	Thromboxane synthase inhibitor	TBXAS1	-0.4623	15.3525	-1.7875
LJP005_HS578T_24H:M24	BRD-K70401845	erlotinib	HS578T	trt_cp	0.04 uM	24 h	2	137	0.51	0.267286	0	0	1	1	0	EGFR inhibitor	EGFR|NR1I2	-0.462	15.3525	-1.7863
CPC018_ASC_24H:BRD-K84595254-001-03-0:10	BRD-K84595254	strophanthidin	ASC	trt_cp	10 uM	24 h	3	421	0.66	0.53302	0	0	1	1	0	Na/K-ATPase inhibitor	ATP1A1	-0.4619	15.3525	-1.786
REP.A024_HELA_24H:L07	BRD-K77947974	fluspirilene	HELA	trt_cp	10 uM	24 h	3	301	0.5266	0.402582	1	1	1	1	0	Dopamine receptor antagonist	DRD2|HTR2A|CACNG1|HRH1|HTR1A|HTR1D|HTR1E	-0.4615	15.3525	-1.7843
CPC006_PC3_6H:BRD-K75532464-001-01-4:10	BRD-K75532464	FTI-276	PC3	trt_cp	10 uM	6 h	4	128	0.16	0.144709	1	0	1	1	0	Farnesyltransferase inhibitor	FNTA	-0.4611	15.3525	-1.783
CPC014_HCC515_6H:BRD-K85985071-001-20-7:10	BRD-K85985071	ellipticine	HCC515	trt_cp	10 uM	6 h	3	250	0.36	0.303355	1	1	1	1	0	Topoisomerase inhibitor	TOP2A|TOP2B	-0.4602	2.6531	-1.7796
CPC007_PC3_24H:BRD-K03067624-003-19-3:10	BRD-K03067624	emetine	PC3	trt_cp	10 uM	24 h	4	626	0.65	0.645022	0	0	1	1	0	Protein synthesis inhibitor	RPS2	-0.4602	2.6459	-1.7795
CPC015_MCF7_24H:BRD-K15933101-001-01-6:10	BRD-K15933101	ropinirole	MCF7	trt_cp	10 uM	24 h	5	323	0.32	0.325092	1	0	1	1	0	Dopamine receptor agonist	DRD2|DRD3|ADRA2A|ADRA2B|ADRA2C|DRD1|DRD4|DRD5|HTR1A|HTR1B|HTR1D|HTR2A|HTR2B|HTR2C	-0.4601	2.609	-1.7792
REP.A011_HA1E_24H:J01	BRD-K06335600	tizanidine	HA1E	trt_cp	10 uM	24 h	3	251	0.4357	0.334396	0	0	1	1	0	Adrenergic receptor agonist	CYP1A2|ADRA2A|ADRA2B|ADRA2C|NISCH	-0.46	2.5625	-1.7787
LJP007_ASC_24H:P13	BRD-K77625799	vandetanib	ASC	trt_cp	10 uM	24 h	3	204	0.4335	0.300705	0	0	1	1	0	EGFR inhibitor|RET tyrosine kinase inhibitor|VEGFR inhibitor	EGFR|KDR|RET|FLT1|FLT4|PTK6|TEK|FLT3|KIT|EPHA1|EPHA10|EPHA2|EPHA3|EPHA4|EPHA5|EPHA6|EPHA7|EPHA8|EPHB1|EPHB2|EPHB3|EPHB4|EPHB6|ERBB2|ERBB3|ERBB4|SRC|VEGFA	-0.4596	2.4323	-1.7772
REP.A013_PC3_24H:B09	BRD-K37355418	efaproxiral	PC3	trt_cp	1.11 uM	24 h	2	80	0.1709	0.118235	0	0	1	1	0	Haemoglobin oxygen release stimulant	HBA1|HBB	-0.4593	2.3535	-1.7759
CPC018_SKB_24H:BRD-K33864865-001-01-7:10	BRD-K33864865	LY-225910	SKB	trt_cp	10 uM	24 h	3	357	0.13	0.217839	1	0	1	1	0	CCK receptor antagonist	CCKBR	-0.4587	2.2381	-1.7735
LJP007_SKL.C_24H:I13	BRD-K71035033	masitinib	SKL	trt_cp	10 uM	24 h	3	236	0.2486	0.244927	1	1	1	1	0	KIT inhibitor|PDGFR inhibitor|Src inhibitor	KIT|FGFR3|LYN|PDGFRB|PDGFRA	-0.4585	2.2113	-1.7728
CPC018_A549_6H:BRD-K06234293-001-01-8:10	BRD-K06234293	LY-364947	A549	trt_cp	10 uM	6 h	3	90	0.13	0.109376	1	0	1	1	0	TGF-beta receptor inhibitor|P38 MAPK inhibitor	TGFBR1	-0.4583	2.1827	-1.7721
CPC018_SKB_24H:BRD-K20742498-001-01-5:10	BRD-K20742498	RS-39604	SKB	trt_cp	10 uM	24 h	3	281	0.27	0.278526	0	0	1	1	0	Serotonin receptor antagonist	HTR4	-0.4581	2.1595	-1.7714
CPC006_NCIH596_6H:BRD-K67868012-003-01-5:11.1	BRD-K67868012	PI-103	NCIH596	trt_cp	12 uM	6 h	2	205	0.56	0.342611	1	1	1	1	0	PI3K inhibitor|MTOR inhibitor	PIK3CA|PIK3CG|MTOR|PIK3CB|PIK3CD|PRKDC	-0.4579	2.1303	-1.7704
CPC002_PC3_24H:BRD-K93201660-001-03-2:10	BRD-K93201660	ML-7	PC3	trt_cp	10 uM	24 h	4	134	0.22	0.173618	1	0	1	1	0	Muscle relaxant	MYLK	-0.4575	2.0967	-1.7692
CPC018_HEPG2_6H:BRD-K03981224-001-02-9:10	BRD-K03981224	ethisterone	HEPG2	trt_cp	10 uM	6 h	3	120	0.09	0.105085	1	0	1	1	0	Progestogen hormone	TYR	-0.4571	2.0562	-1.7675
CPC015_ASC_24H:BRD-K37206356-001-02-1:10	BRD-K37206356	rhamnetin	ASC	trt_cp	10 uM	24 h	4	336	0.28	0.310155	0	0	1	1	0	Aldose reductase inhibitor	ALOX5	-0.457	2.0413	-1.7669
CPC018_SKB_24H:BRD-K26429091-051-01-9:10	BRD-K26429091	J-104129	SKB	trt_cp	10 uM	24 h	3	223	0.44	0.316745	0	0	1	1	0	Acetylcholine receptor antagonist	CHRM3	-0.4556	1.9465	-1.7616
REP.B014_HA1E_24H:I23	BRD-K56851771	enzalutamide	HA1E	trt_cp	0.03 uM	24 h	2	468	0.3576	0.413668	1	1	1	1	0	Androgen receptor antagonist	AR|CYP2C19|CYP2C8|CYP3A4	-0.4554	1.9382	-1.761
REP.B021_MDAMB231_24H:M06	BRD-K85119730	tolbutamide	MDAMB231	trt_cp	0.01 uM	24 h	2	86	0.0536	0.0686534	0	0	1	1	0	ATP channel blocker	ABCC8|KCNJ11|CYP2B6|CYP2C19|CYP2C8|KCNJ1|KCNJ8	-0.4546	1.8964	-1.7578
CPC018_A549_24H:BRD-K30816563-003-01-1:10	BRD-K30816563	ranitidine	A549	trt_cp	10 uM	24 h	2	276	0.31	0.295778	0	0	1	1	0	Histamine receptor antagonist	HRH2|SLC22A2	-0.4541	1.8794	-1.7559
REP.A028_HELA_24H:P01	BRD-K97399794	quercetin	HELA	trt_cp	10 uM	24 h	3	464	0.6544	0.5572	1	1	1	1	0	Polar auxin transport inhibitor	PIK3CG|AKR1B1|CYP2C8|EGFR|GAA|MAOA|PTPN1|SCN5A|SIRT1|XDH|ATP5A1|ATP5B|ATP5C1|HCK|HIBCH|PIM1|STK17B|UGT3A1	-0.4539	1.8717	-1.755
CPC012_A375_6H:K16	BRD-K48935217	epothilone	A375	trt_cp	10 uM	6 h	5	168	0.2304	0.198942	0	0	1	1	0	Tubulin inhibitor	TUBB	-0.4532	1.849	-1.7522
MOAR003_PC3_24H:M23	BRD-K57927309	BW-180C	PC3	trt_cp	3.33 uM	24 h	2	70	0.2249	0.126874	1	1	1	1	0	Opioid receptor agonist	OPRD1|SLC6A2|OPRM1	-0.4531	1.8462	-1.7518
CPC018_SKB_24H:BRD-K49657628-001-02-3:10	BRD-K49657628	BRD-K49657628	SKB	trt_cp	10 uM	24 h	3	389	0.39	0.393856	0	0	1	1	0	EGFR inhibitor|Tyrosine kinase inhibitor	EGFR	-0.4527	1.8363	-1.7506
CPC016_A549_24H:BRD-K82731415-001-05-4:10	BRD-K82731415	olomoucine	A549	trt_cp	10 uM	24 h	3	358	0.44	0.401327	0	0	1	1	0	CDK inhibitor	CDK1|CDK2|CDK5|MAPK1	-0.4526	1.8327	-1.75
PBIOA019_HCC515_24H:I19	BRD-K71106091	fludarabine-phosphate	HCC515	trt_cp	10 uM	24 h	3	456	0.65	0.550516	1	1	1	1	0	DNA inhibitor|DNA repair enzyme inhibitor|Purine antagonist	POLA1|RRM1|DCK|POLD1|POLE|RRM2|RRM2B	-0.4525	1.8311	-1.7498
REP.A002_A549_24H:A19	BRD-A15909516	rebamipide	A549	trt_cp	10 uM	24 h	3	106	0.0931	0.100452	0	0	1	1	0	Free radical scavenger	FPR1	-0.4525	1.8297	-1.7496
REP.B022_YAPC_24H:E20	BRD-K70330367	amantadine	YAPC	trt_cp	0.74 uM	24 h	2	139	0.0925	0.114659	0	0	1	1	0	Glutamate receptor antagonist	GRIN1|DRD2|GRIN2A|GRIN2B|GRIN2C|GRIN2D|GRIN3A	-0.4522	1.8206	-1.7484
REP.B013_HUVEC.A_24H:L03	BRD-K42098891	protriptyline	HUVEC	trt_cp	0.25 uM	24 h	2	101	0.1033	0.103286	0	0	1	1	0	Tricyclic antidepressant	SLC6A2|SLC6A4	-0.4521	1.8182	-1.7481
LJP005_HS578T_3H:M01	BRD-K94176593	TWS-119	HS578T	trt_cp	10 uM	3 h	2	222	0.6104	0.372233	1	1	1	1	0	GSK inhibitor	GSK3B|JUN|MYC	-0.4514	1.8015	-1.7455
CPC006_SW480_6H:BRD-K32107296-001-03-7:10	BRD-K32107296	temozolomide	SW480	trt_cp	10 uM	6 h	2	129	0.15	0.14066	0	0	1	1	0	DNA alkylating agent	TOP2A|MGMT	-0.4508	1.7854	-1.7432
REP.B021_MDAMB231_24H:B13	BRD-K80396088	gliquidone	MDAMB231	trt_cp	2.22 uM	24 h	2	206	0.0723	0.123405	0	0	1	1	0	Sulfonylurea	ABCC8|KCNJ11|KCNJ10|KCNJ8	-0.4507	1.7819	-1.7427
CPC016_SKB_24H:BRD-K81209512-001-01-3:10	BRD-K81209512	AG-494	SKB	trt_cp	10 uM	24 h	3	162	0.24	0.199386	1	0	1	1	0	EGFR inhibitor|Tyrosine kinase inhibitor	EGFR	-0.4504	1.7736	-1.7415
CPC016_ASC_24H:BRD-A63546914-003-01-2:10	BRD-A63546914	Ro-04-5595	ASC	trt_cp	10 uM	24 h	3	234	0.31	0.272345	0	0	1	1	0	Glutamate receptor antagonist	GRIN2B	-0.4502	1.7693	-1.7409
CPC018_ASC_24H:BRD-K63606607-001-01-8:10	BRD-K63606607	bufalin	ASC	trt_cp	10 uM	24 h	3	471	0.72	0.588854	1	1	1	1	0	Na/K-ATPase inhibitor	ATP1A1	-0.4499	1.7606	-1.7396
REP.A012_HA1E_24H:F01	BRD-K00911143	brexpiprazole	HA1E	trt_cp	10 uM	24 h	3	283	0.5021	0.38117	1	1	1	1	0	Dopamine receptor antagonist	DRD2|HTR1A|HTR2A|DRD3	-0.4497	1.7544	-1.7387
CPC018_SKB_24H:BRD-A00758722-001-03-1:10	BRD-A00758722	noretynodrel	SKB	trt_cp	10 uM	24 h	3	385	0.34	0.365848	0	0	1	1	0	Progestogen hormone	PGR	-0.4496	1.7519	-1.7384
CPC016_NPC_24H:BRD-K47598052-001-06-7:10	BRD-K47598052	PP-1	NPC	trt_cp	10 uM	24 h	4	406	0.45	0.432215	0	0	1	1	0	Src inhibitor|Abl inhibitor	SRC|HCK|RET	-0.4495	1.7507	-1.7382
CPC016_SKB_24H:BRD-K62996583-001-03-8:10	BRD-K62996583	lidoflazine	SKB	trt_cp	10 uM	24 h	3	217	0.36	0.282626	1	1	1	1	0	Calcium channel blocker	SCN1A|SCN3A|SLC29A1	-0.4495	1.7509	-1.7382
LJP007_CD34_24H:E23	BRD-K13662825	dinaciclib	CD34	trt_cp	0.12 uM	24 h	2	675	0.6299	0.659353	0	0	1	1	0	CDK inhibitor	CDK1|CDK2|CDK9|CDK5|CCNT1	-0.4494	1.7467	-1.7376
CPC018_NPC_24H:BRD-K46469693-001-01-8:10	BRD-K46469693	SCH-442416	NPC	trt_cp	10 uM	24 h	3	303	0.24	0.272683	0	0	1	1	0	Adenosine receptor antagonist	ADORA1|ADORA2A	-0.449	1.7382	-1.7363
CPC004_HA1E_6H:BRD-A25687296-300-03-5:10	BRD-A25687296	emetine	HA1E	trt_cp	10 uM	6 h	3	537	0.81	0.666899	1	1	1	1	0	Protein synthesis inhibitor	RPS2	-0.4483	1.7178	-1.7333
REP.A009_A549_24H:M24	BRD-A33692381	zidovudine	A549	trt_cp	0.04 uM	24 h	3	132	0.2267	0.174922	1	1	1	1	0	Reverse transcriptase inhibitor	TERT	-0.448	1.7116	-1.7324
PAC004_U2OS_6H:BRD-K08115555-001-02-8:10	BRD-K08115555	BRD-K08115555	U2OS	trt_cp	10 uM	6 h	2	9	0.14	0.0358935	1	0	1	1	0	TNF inhibitor	TNF	-0.4477	1.7033	-1.7312
CPC018_PHH_24H:BRD-K14965640-001-03-3:10	BRD-K14965640	BRD-K14965640	PHH	trt_cp	10 uM	24 h	3	214	0.22	0.219406	0	0	1	1	0	Cyclooxygenase inhibitor	PTGS2|PTGS1|ASIC1|BCL2|CFTR|FABP2|PLAT|PPARG|SLC5A8|THBD	-0.4473	1.6927	-1.7296
LJP008_A549_24H:G19	BRD-K03406345	azacitidine	A549	trt_cp	10 uM	24 h	2	537	0.7758	0.652668	1	1	1	1	0	DNA inhibitor	DNMT1|DNMT3A	-0.4472	1.6904	-1.7292
PAC001_U2OS_6H:BRD-K71266197-236-01-9:10	BRD-K71266197	PSB-06126	U2OS	trt_cp	10 uM	6 h	2	75	0.07	0.0732673	0	0	1	1	0	NTPDase inhibitor	ENTPD3	-0.4472	1.6901	-1.7291
REP.A008_YAPC_24H:G01	BRD-K60038276	irbesartan	YAPC	trt_cp	10 uM	24 h	3	288	0.2302	0.260363	0	0	1	1	0	Angiotensin receptor antagonist	AGTR1|JUN|SLC10A1	-0.4469	1.6818	-1.728
MUC.CP008_MCF7_24H:P08	BRD-K29656036	MK-8245	MCF7	trt_cp	3.33 uM	24 h	3	314	0.5	0.400664	1	1	1	1	0	Stearoyl-CoA desaturase inhibitor	SCD	-0.4467	1.6785	-1.7274
REP.A026_YAPC_24H:L24	BRD-K92093830	doxorubicin	YAPC	trt_cp	0.04 uM	24 h	2	221	0.3997	0.300534	0	0	1	1	0	Topoisomerase inhibitor	TOP2A	-0.4464	1.6681	-1.7259
CPC015_SKB_24H:BRD-K19136521-001-03-0:10	BRD-K19136521	BRD-K19136521	SKB	trt_cp	10 uM	24 h	2	259	0.09	0.154384	0	0	1	1	0	CDK inhibitor|GSK inhibitor	CDK1|CDK2|CDK5|CCNE1|CDK4|CDK9|LCK|LRRK1|LRRK2|CDK5R1|GSK3B	-0.4456	1.6471	-1.723
CPC018_ASC_24H:BRD-K59256312-066-04-1:10	BRD-K59256312	gabexate	ASC	trt_cp	10 uM	24 h	3	433	0.37	0.404739	0	0	1	1	0	Serine protease inhibitor	PRSS1|TPSAB1	-0.4453	1.6395	-1.7219
CPC018_SKB_24H:BRD-K06895174-001-01-0:10	BRD-K06895174	cisapride	SKB	trt_cp	10 uM	24 h	3	342	0.61	0.461858	0	0	1	1	0	Serotonin receptor agonist	HTR4|KCNH2|CYP2B6|CYP2C8|CYP3A5|CYP3A7|HTR2A|HTR3A	-0.4451	1.6335	-1.7212
PBIOA015_MCF7_24H:E13	BRD-K54330070	SB-202190	MCF7	trt_cp	10 uM	24 h	3	213	0.37	0.283871	1	1	1	1	0	P38 MAPK inhibitor	MAPK14|AKT1|ALOX5|CHEK1|GSK3B|LCK|MAPK1|MAPK11|MAPK12|MAPK8|PRKCA|ROCK1|RPS6KB1|SGK1	-0.4447	1.621	-1.7196
AICHI002_NALM6_24H:B19	BRD-K57080016	selumetinib	NALM6	trt_cp	10 uM	24 h	3	228	0.35	0.285649	1	1	1	1	0	MEK inhibitor	MAP2K1|MAP2K2	-0.4447	1.6211	-1.7196
CPC006_NOMO1_6H:BRD-K59184148-001-04-2:10	BRD-K59184148	SB-216763	NOMO1	trt_cp	10 uM	6 h	2	438	0.09	0.200765	0	0	1	1	0	GSK inhibitor	GSK3B|CCNA2|CDK2|GSK3A	-0.444	1.5877	-1.7167
NMH001_NEU_24H:BRD-K48300629-001-10-3:10	BRD-K48300629	zonisamide	NEU	trt_cp	10 uM	24 h	2	89	0.02	0.0426619	0	0	1	1	0	Sodium channel inhibitor|Calcium channel blocker	SCN1A|CA1|CA12|CA7|SCN11A|SCN2A|SCN3A|SCN4A|SCN5A|SCN9A|CA10|CA11|CA13|CA14|CA2|CA3|CA4|CA5A|CA5B|CA6|CA8|CA9|CACNA1G|CACNA1H|CACNA1I|MAOA|MAOB|SCN10A|SCN1B|SCN2B|SCN3B|SCN4B|SCN7A|SCN8A	-0.4439	1.585	-1.7165
MOAR004_PC3_24H:I18	BRD-K66830666	BAZ2-ICR	PC3	trt_cp	1.11 uM	24 h	3	87	0.1	0.094317	1	0	1	1	0	Bromodomain inhibitor	ZNF215	-0.4439	1.5812	-1.7163
CPC006_SW480_6H:BRD-K11853856-003-01-3:10	BRD-K11853856	PJ-34	SW480	trt_cp	10 uM	6 h	2	112	0.15	0.131065	0	0	1	1	0	PARP inhibitor	EEF2|PARP1|PARP15|PARP3	-0.4437	1.5727	-1.7157
CPC020_HA1E_6H:BRD-K66788707-001-11-9:10	BRD-K66788707	fludarabine	HA1E	trt_cp	10 uM	6 h	3	160	0.32	0.228805	1	0	1	1	0	DNA inhibitor	ADA|RRM1|RRM2	-0.4435	1.5616	-1.715
CPC017_PHH_24H:BRD-K96778649-001-03-2:10	BRD-K96778649	tyrphostin-47	PHH	trt_cp	10 uM	24 h	3	214	0.28	0.247524	0	0	1	1	0	EGFR inhibitor	EGFR	-0.4435	1.5588	-1.7147
REP.A011_A549_24H:O07	BRD-K07691486	roscovitine	A549	trt_cp	10 uM	24 h	3	228	0.3697	0.293577	0	0	1	1	0	CDK inhibitor	CDK2|CDK9|CDK7|CDK1|CDK5	-0.4434	1.5588	-1.7144
REP.A022_HEK293_24H:A18	BRD-K75958547	pitavastatin	HEK293	trt_cp	0.04 uM	24 h	3	129	0.0672	0.0941478	0	0	1	1	0	HMGCR inhibitor	HMGCR|APOA1|CYP2C8	-0.4433	1.5588	-1.7142
CPC016_NEU_24H:BRD-A63546914-003-01-2:10	BRD-A63546914	Ro-04-5595	NEU	trt_cp	10 uM	24 h	3	178	0.13	0.15382	0	0	1	1	0	Glutamate receptor antagonist	GRIN2B	-0.4431	1.5588	-1.7132
LPROT004_YAPC_6H:BRD-K74236984:10	BRD-K74236984	UNC-0321	YAPC	trt_cp	10 uM	6 h	3	120	0.48	0.242684	1	1	1	1	0	Histone lysine methyltransferase inhibitor	EHMT2	-0.443	1.5588	-1.7128
REP.A017_HT29_24H:M10	BRD-K67680372	CI-966	HT29	trt_cp	0.37 uM	24 h	3	99	0.1346	0.116727	1	1	1	1	0	GAT inhibitor	SLC6A1	-0.4429	1.5588	-1.7124
CPC014_HA1E_6H:BRD-K07736136-001-01-2:10	BRD-K07736136	VX-702	HA1E	trt_cp	10 uM	6 h	3	84	0.12	0.101522	1	0	1	1	0	P38 MAPK inhibitor	MAPK14|MAPK11|MAPK12	-0.4429	1.5588	-1.7124
CPC014_PHH_24H:BRD-K09186807-001-01-6:10	BRD-K09186807	KIN001-244	PHH	trt_cp	10 uM	24 h	4	277	0.08	0.150527	0	0	1	1	0	PDK1 Inhibitor	PDPK1	-0.4429	1.5588	-1.7124
CPC018_SKB_24H:BRD-K17497770-001-01-0:10	BRD-K17497770	butein	SKB	trt_cp	10 uM	24 h	3	179	0.45	0.286988	0	0	1	1	0	EGFR inhibitor|Src inhibitor	ACE|CXCL8|IL6|SIRT1|SRD5A1|SRD5A2|TNF	-0.4428	1.5588	-1.7121
REP.B022_A549_24H:M15	BRD-K72414522	AZD-5438	A549	trt_cp	0.25 uM	24 h	2	249	0.3049	0.278618	0	0	1	1	0	CDK inhibitor	CCNB1|CCNE1|CDK1|CDK2|KCNH2	-0.4427	1.5588	-1.7117
CPC018_SKB_24H:BRD-K73290745-003-01-8:10	BRD-K73290745	ICI-199441	SKB	trt_cp	10 uM	24 h	2	116	0.32	0.19482	0	0	1	1	0	Opioid receptor agonist	OPRK1|CYP2D6|OPRD1|OPRM1|UTS2R	-0.4426	1.5588	-1.7115
CPC006_H1299_6H:BRD-K88560311-011-02-2:10	BRD-K88560311	rucaparib	H1299	trt_cp	10 uM	6 h	2	56	0.44	0.158727	0	0	1	1	0	PARP inhibitor	PARP1|PARP2	-0.4425	1.5588	-1.7111
CPC014_MCF7_6H:N15	BRD-K80725632	lavendustin-c	MCF7	trt_cp	10 uM	6 h	5	162	0.0656	0.104241	1	0	1	1	0	EGFR inhibitor	CAMK2A|EGFR|SRC	-0.4423	1.5588	-1.7102
REP.A010_MDAMB231_24H:F17	BRD-K12994359	valdecoxib	MDAMB231	trt_cp	0.125 uM	24 h	3	68	0.106	0.0858495	1	0	1	1	0	Cyclooxygenase inhibitor	PTGS2|CYP2C19|CA12	-0.4419	1.5588	-1.7085
REP.A026_A375_24H:B23	BRD-K87909389	alvocidib	A375	trt_cp	0.125 uM	24 h	3	367	0.4647	0.41759	0	0	1	1	0	CDK inhibitor	CDK2|CDK4|CDK1|CDK6|CDK7|CDK9|CDK5|CDK8|EGFR|PYGM|BCL2|BIRC5|CCNT1|MCL1|XIAP	-0.4411	1.5588	-1.7055
CPC007_HT29_6H:BRD-K03067624-003-19-3:10	BRD-K03067624	emetine	HT29	trt_cp	10 uM	6 h	4	541	0.64	0.595003	1	1	1	1	0	Protein synthesis inhibitor	RPS2	-0.4411	1.5588	-1.7054
REP.A026_PC3_24H:A19	BRD-K87782578	AVL-292	PC3	trt_cp	10 uM	24 h	2	224	0.3058	0.264651	0	0	1	1	0	BTK inhibitor	BTK|EGFR|ITK|JAK3|YES1	-0.441	1.5588	-1.7051
CPC009_HCC515_6H:BRD-K74501079-001-13-2:10	BRD-K74501079	azithromycin	HCC515	trt_cp	10 uM	6 h	3	178	0.1	0.134909	1	0	1	1	0	Bacterial 50S ribosomal subunit inhibitor	MLNR	-0.441	1.5588	-1.705
REP.A008_HELA_24H:N01	BRD-A87983072	benzotript	HELA	trt_cp	10 uM	24 h	3	168	0.4879	0.289501	0	0	1	1	0	CCK receptor antagonist	CCKBR|CCKAR	-0.4408	1.5588	-1.7046
CPC014_SKB_24H:BRD-A60245366-001-01-1:10	BRD-A60245366	AS-601245	SKB	trt_cp	10 uM	24 h	3	503	0.74	0.616922	0	0	1	1	0	JNK inhibitor	MAPK10|MAPK8|MAPK9	-0.4406	1.5588	-1.7036
LJP007_ASC_24H:P01	BRD-K60866521	idelalisib	ASC	trt_cp	10 uM	24 h	3	234	0.4768	0.337759	0	0	1	1	0	PI3K inhibitor	PIK3CD|PIK3CG|CCL3|CCL4|PIK3CA|PIK3CB	-0.4405	1.5588	-1.7031
PBIOA015_HCC515_24H:I01	BRD-K71847383	cytarabine	HCC515	trt_cp	10 uM	24 h	3	549	0.7743	0.659282	1	1	1	1	0	Ribonucleoside reductase inhibitor	POLA1|POLB|POLD1|POLE	-0.4405	1.5588	-1.7031
LPROT001_A375_6H:BRD-K87124298:2	BRD-K87124298	OSI-027	A375	trt_cp	2.22 uM	6 h	3	194	0.4	0.281684	1	1	1	1	0	MTOR inhibitor	MTOR	-0.4402	1.5588	-1.7022
CPC014_ASC_24H:BRD-K64800655-001-01-7:10	BRD-K64800655	PHA-793887	ASC	trt_cp	10 uM	24 h	3	627	0.72	0.679408	0	0	1	1	0	CDK inhibitor	CDK1|CDK2|CDK4|CDK5|CCND1|CCNE1|CDK7|CDK9	-0.4401	1.5588	-1.7018
REP.A006_HELA_24H:H19	BRD-K21283037	riluzole	HELA	trt_cp	10 uM	24 h	3	471	0.7334	0.594308	0	0	1	1	0	Glutamate inhibitor	SCN5A|KCND3|KCNK10|KCNK2|KCNK4|KCNN4|SCN10A|SCN11A|SCN1A|SCN2A|SCN3A|SCN4A|SCN7A|SCN8A|SCN9A|SLC7A11	-0.4398	1.5588	-1.7007
CVD001_HUH7_6H:BRD-K03067624-001-01-5:10	BRD-K03067624	emetine	HUH7	trt_cp	10 uM	6 h	3	494	0.69	0.590362	0	0	1	1	0	Protein synthesis inhibitor	RPS2	-0.4393	1.5588	-1.6986
CPC016_ASC_24H:BRD-K19309090-300-03-0:10	BRD-K19309090	SR-95639A	ASC	trt_cp	10 uM	24 h	3	316	0.41	0.36397	0	0	1	1	0	Acetylcholine receptor agonist	CHRM1	-0.4392	1.5588	-1.6982
CPC018_HEPG2_6H:BRD-K17796732-001-02-0:10	BRD-K17796732	JWH-015	HEPG2	trt_cp	10 uM	6 h	3	116	0.09	0.103319	1	0	1	1	0	Cannabinoid receptor agonist	CNR2	-0.4391	1.5588	-1.6977
CPC016_SKB_24H:BRD-K91370081-001-10-3:10	BRD-K91370081	anisomycin	SKB	trt_cp	10 uM	24 h	3	527	0.81	0.660661	0	0	1	1	0	DNA inhibitor	RPL10L|RPL11|RPL13A|RPL15|RPL19|RPL23|RPL23A|RPL26L1|RPL3|RPL37|RPL8|RSL24D1|SNU13	-0.439	1.5588	-1.6974
CPC016_HT29_6H:BRD-K92073408-001-03-3:10	BRD-K92073408	BRD-K92073408	HT29	trt_cp	10 uM	6 h	5	126	0.08	0.101522	1	0	1	1	0	Progestogen hormone|Progesterone receptor agonist	PGR	-0.4389	1.5588	-1.697
CPC012_SKB_24H:BRD-A61858259-001-01-0:10	BRD-A61858259	CAY-10415	SKB	trt_cp	10 uM	24 h	4	397	0.12	0.220707	0	0	1	1	0	Insulin sensitizer	INS	-0.4386	1.5588	-1.6961
REP.A024_JURKAT_24H:F05	BRD-K74765201	tomelukast	JURKAT	trt_cp	0.01 uM	24 h	3	575	0.0995	0.241867	1	0	1	1	0	Leukotriene receptor antagonist	CYSLTR1	-0.4386	1.5588	-1.696
LJP007_ASC_24H:P07	BRD-K12040459	AT-7867	ASC	trt_cp	10 uM	24 h	3	191	0.3795	0.272241	0	0	1	1	0	AKT inhibitor	AKT2|ROCK2|GSK3B|PKIA|PRKACA	-0.4386	1.5588	-1.6958
CPC006_SW480_6H:BRD-A45889380-300-04-8:10	BRD-A45889380	mepacrine	SW480	trt_cp	10 uM	6 h	2	112	0.19	0.147508	0	0	1	1	0	NFKB inhibitor|Cytokine production inhibitor|p53 activator	TP53|AKT1|MTOR|NFKB1|PLA2G2A|PLA2G2D|PLA2G1B|PLA2G4A|PLA2G6|PLCL1	-0.4383	1.5588	-1.6948
CPC016_NPC_24H:BRD-K28307902-001-09-2:10	BRD-K28307902	flutamide	NPC	trt_cp	10 uM	24 h	4	126	0.08	0.101522	0	0	1	1	0	Androgen receptor antagonist	AR|CYP2C19|AHR	-0.4379	1.5588	-1.6931
PBIOA015_HCC515_24H:I16	BRD-K34022604	clofarabine	HCC515	trt_cp	0.37 uM	24 h	3	603	0.776	0.691704	1	1	1	1	0	Ribonucleoside reductase inhibitor	RRM1|POLA1|RRM2|SLC22A8|POLD1|POLE|RRM2B	-0.4378	1.5588	-1.693
MOAR006_A375_24H:I24	BRD-K22477529	STF-31	A375	trt_cp	1.11 uM	24 h	3	267	0.53	0.380386	1	1	1	1	0	NAMPT inhibitor	NAMPT|SLC2A1	-0.4379	1.5588	-1.693
CPC018_PHH_24H:BRD-K73824630-001-03-2:10	BRD-K73824630	skatole	PHH	trt_cp	10 uM	24 h	3	155	0.29	0.214386	0	0	1	1	0	Thrombin inhibitor	CYP2F1	-0.4377	1.5588	-1.6923
CPC006_THP1_6H:L13	BRD-K96354014	nifedipine	THP1	trt_cp	10 uM	6 h	2	73	0.2077	0.124512	1	1	1	1	0	Calcium channel blocker	CACNA1C|CACNA1D|CACNA1S|CACNA1F|CACNA2D1|CYP3A5|CACNA1H|CACNB2|CALM1|GLRA1|GLRA3|GLRB|KCNA1|KCNA5|NR1I2|TRPM3	-0.4374	1.5588	-1.6912
CPC018_SKB_24H:BRD-K14765469-003-02-3:10	BRD-K14765469	vesamicol	SKB	trt_cp	10 uM	24 h	3	116	0.25	0.172199	0	0	1	1	0	Acetylcholinesterase inhibitor	SLC18A3	-0.4373	1.5588	-1.6907
CPC003_HCC515_6H:BRD-K63550407-001-08-5:10	BRD-K63550407	erythromycin	HCC515	trt_cp	10 uM	6 h	3	445	0.12	0.233669	0	0	1	1	0	NFKB inhibitor	MLNR	-0.4372	1.5588	-1.6906
CPC006_MCF7_24H:B12	BRD-A97437073	rosiglitazone	MCF7	trt_cp	80 uM	24 h	5	107	0.2269	0.157558	1	1	1	1	0	PPAR receptor agonist|Insulin sensitizer	PPARG|CYP2C8|INS|ACSL4|FFAR1|TRPC5|TRPM3	-0.437	1.5588	-1.6896
CPC016_ASC_24H:BRD-K22010301-001-01-2:10	BRD-K22010301	JLK-6	ASC	trt_cp	10 uM	24 h	3	143	0.2	0.171007	0	0	1	1	0	Gamma secretase inhibitor|Beta amyloid inhibitor	PSEN1	-0.4365	1.5588	-1.6879
CPC018_SKB_24H:BRD-K08619574-334-03-9:10	BRD-K08619574	thioproperazine	SKB	trt_cp	10 uM	24 h	3	533	0.22	0.346263	0	0	1	1	0	Dopamine receptor antagonist	ADRA1A|ADRA1B|DRD1|DRD2|HTR1A|HTR2A	-0.4364	1.5588	-1.6875
MOAR005_A375_24H:P23	BRD-A08545410	doxycycline	A375	trt_cp	3.33 uM	24 h	3	144	0.35	0.22701	1	1	1	1	0	Bacterial 30S ribosomal subunit inhibitor	MMP8|MMP1	-0.4361	1.5588	-1.6862
LPROT004_YAPC_6H:BRD-K83189926:1	BRD-K83189926	UNC-1215	YAPC	trt_cp	1.11 uM	6 h	3	136	0.57	0.281538	1	1	1	1	0	L3MBTL antagonist	L3MBTL3	-0.4358	1.5588	-1.6852
CPC005_A549_6H:BRD-K50417881-003-05-9:10	BRD-K50417881	eticlopride	A549	trt_cp	10 uM	6 h	3	282	0.34	0.313108	1	1	1	1	0	Dopamine receptor antagonist	DRD2|DRD3|DRD4	-0.4358	1.5588	-1.6852
CPC001_HA1E_24H:BRD-A44551378-001-01-9:10	BRD-A44551378	LFM-A12	HA1E	trt_cp	10 uM	24 h	3	235	0.42	0.317679	1	1	1	1	0	EGFR inhibitor	EGFR	-0.4357	1.5588	-1.6845
CPC006_VCAP_6H:BRD-A26711594-003-06-4:10	BRD-A26711594	nicardipine	VCAP	trt_cp	10 uM	6 h	4	178	0.34	0.24876	1	1	1	1	0	Calcium channel blocker	CACNA1C|ADORA3|ADRA1A|ADRA1B|ADRA1D|CACNA1D|CACNA2D1|CACNB2|CALM1|CHRM1|CHRM2|CHRM3|CHRM4|CHRM5|PDE1A|PDE1B	-0.4355	1.5588	-1.6841
PAC002_U2OS_6H:BRD-K45117373-001-01-1:10	BRD-K45117373	Y-26763	U2OS	trt_cp	10 uM	6 h	2	199	0.08	0.127586	0	0	1	1	0	Potassium channel activator	KCNJ8|ABCC9	-0.4355	1.5588	-1.684
REP.B028_MCF7_24H:D01	BRD-A92826379	lupanine	MCF7	trt_cp	2.22 uM	24 h	2	110	0.4069	0.21393	1	1	1	1	0	Sodium channel inhibitor	INS	-0.4353	1.5588	-1.6833
HOG003_A549_6H:BRD-K78126613-001-16-0:10	BRD-K78126613	menadione	A549	trt_cp	10 uM	6 h	3	267	0.55	0.387496	1	1	1	1	0	Mitochondrial inhibitor|Phosphatase inhibitor	PKM|AOX1|BGLAP|F10|F2|F7|F9|GGCX|NQO1|NQO2|PROC|PROS1|PROZ|VKORC1|VKORC1L1	-0.4352	1.5588	-1.6827
CPC016_A375_6H:BRD-K87049188-001-03-6:10	BRD-K87049188	fusaric-acid	A375	trt_cp	10 uM	6 h	5	328	0.13	0.208804	0	0	1	1	0	Dopamine receptor antagonist	DBH	-0.435	1.5588	-1.6819
REP.A001_A375_24H:L01	BRD-K28984613	dutasteride	A375	trt_cp	10 uM	24 h	3	259	0.3382	0.299273	1	1	1	1	0	5-alpha reductase inhibitor	SRD5A1|SRD5A2|CYP3A5	-0.4349	1.5588	-1.6815
CPC017_HEPG2_6H:BRD-A15435692-003-01-5:10	BRD-A15435692	BMY-14802	HEPG2	trt_cp	10 uM	6 h	3	76	0.16	0.111506	1	0	1	1	0	Sigma receptor antagonist	HTR1A|SIGMAR1	-0.4349	1.5588	-1.6814
LJP007_CD34_24H:E12	BRD-K25340465	OSI-930	CD34	trt_cp	0.04 uM	24 h	3	118	0.2152	0.161136	1	1	1	1	0	KIT inhibitor|VEGFR inhibitor	KIT|KDR|PDGFB|PDGFRB	-0.4346	1.5588	-1.6804
REP.A009_HELA_24H:C01	BRD-K28428262	brivanib	HELA	trt_cp	10 uM	24 h	3	277	0.463	0.362127	0	0	1	1	0	FGFR inhibitor|VEGFR inhibitor	FGFR1|KDR|FLT1|FGFR2|FGFR3|FLT4|CYP3A4|KCNH2	-0.4345	1.5588	-1.68
LJP007_YAPC_24H:G20	BRD-K09186807	KIN001-244	YAPC	trt_cp	3.33 uM	24 h	3	69	0.1254	0.0940598	1	0	1	1	0	PDK1 Inhibitor	PDPK1	-0.434	1.5588	-1.6781
CPC017_PHH_24H:BRD-K15791587-003-01-7:10	BRD-K15791587	L-733060	PHH	trt_cp	10 uM	24 h	2	176	0.25	0.212108	0	0	1	1	0	Tachykinin antagonist	TACR1	-0.4337	1.5588	-1.677
CPC013_ASC_24H:BRD-K35687265-236-01-8:10	BRD-K35687265	ON-01910	ASC	trt_cp	10 uM	24 h	3	291	0.27	0.283439	1	0	1	1	0	PLK inhibitor	PLK1|CDK1|FLT1|FYN|PDGFRA|PLK2|SRC	-0.4335	1.5588	-1.6763
CPC008_A375_6H:F12	BRD-K42629487	SF-11	A375	trt_cp	10 uM	6 h	3	119	0.2511	0.174794	1	0	1	1	0	Neuropeptide receptor antagonist	MCOLN3|NPY2R	-0.4331	1.5588	-1.6747
CPC005_HA1E_24H:BRD-K80451230-051-01-8:10	BRD-K80451230	zamifenacin	HA1E	trt_cp	10 uM	24 h	3	259	0.07	0.136154	1	0	1	1	0	Acetylcholine receptor antagonist	CHRM3	-0.4331	1.5588	-1.6745
LJP008_A549_24H:F17	BRD-K83189926	UNC-1215	A549	trt_cp	0.12 uM	24 h	2	63	0.2614	0.129764	1	1	1	1	0	L3MBTL antagonist	L3MBTL3	-0.4326	1.5588	-1.6729
CPC006_NOMO1_6H:BRD-K92980438-001-01-7:160	BRD-K92980438	BRD-K92980438	NOMO1	trt_cp	150 uM	6 h	2	64	0.03	0.0443079	1	0	1	1	0	Hexokinase inhibitor	HK2	-0.4323	1.5588	-1.6716
CPC018_SKB_24H:BRD-K31843556-001-01-7:10	BRD-K31843556	T-0070907	SKB	trt_cp	10 uM	24 h	3	113	0.2	0.152014	1	0	1	1	0	PPAR receptor antagonist	PPARG	-0.4319	1.5588	-1.6702
EMU001_TMD8_3H:L05	BRD-K92428153	mycophenolate-mofetil	TMD8	trt_cp	0.04 uM	3 h	3	131	0.2762	0.192344	0	0	1	1	0	Inosine monophosphate dehydrogenase inhibitor|Dehydrogenase inhibitor|Hydroxycarboxylic acid receptor agonist|Immunosuppressant|Inositol monophosphatase inhibitor	IMPDH1|IMPDH2|HCAR2	-0.432	1.5588	-1.6702
REP.A026_HEK293_24H:L22	BRD-K92093830	doxorubicin	HEK293	trt_cp	0.37 uM	24 h	2	428	0.2794	0.349676	0	0	1	1	0	Topoisomerase inhibitor	TOP2A	-0.4318	1.5584	-1.6695
CPC014_SKB_24H:BRD-K77008974-001-01-6:10	BRD-K77008974	WYE-354	SKB	trt_cp	10 uM	24 h	4	141	0.22	0.178095	0	0	1	1	0	MTOR inhibitor	MTOR	-0.4317	1.5584	-1.6694
PBIOA020_HEPG2_24H:B13	BRD-K61314889	endo-IWR-1	HEPG2	trt_cp	10 uM	24 h	3	143	0.25	0.191192	1	1	1	1	0	PARP inhibitor	TNKS|TNKS2	-0.4317	1.5583	-1.6691
CPC014_SKB_24H:BRD-K09790412-001-03-8:10	BRD-K09790412	H-9	SKB	trt_cp	10 uM	24 h	4	340	0.14	0.220614	0	0	1	1	0	PKA inhibitor	PRKACA	-0.4316	1.5582	-1.669
CPC016_HT29_6H:BRD-K97810537-001-03-7:10	BRD-K97810537	beclomethasone-dipropionate	HT29	trt_cp	10 uM	6 h	5	117	0.06	0.0847226	1	0	1	1	0	Immunosuppressant|Glucocorticoid receptor agonist	NR3C1|CYP3A5|ADGRG3	-0.4311	1.5559	-1.6667
REP.A012_HEK293_24H:A15	BRD-K00152668	adarotene	HEK293	trt_cp	1.11 uM	24 h	3	505	0.6954	0.59923	1	1	1	1	0	Retinoid receptor agonist	RARG|RARA|RARB	-0.4309	1.5548	-1.6661
PAC001_U2OS_6H:BRD-K93201660-001-05-7:24	BRD-K93201660	ML-7	U2OS	trt_cp	25 uM	6 h	2	85	0.33	0.169355	0	0	1	1	0	Muscle relaxant	MYLK	-0.4309	1.5548	-1.6661
CPC006_SW480_6H:BRD-A41451487-001-06-2:160	BRD-A41451487	PK-11195	SW480	trt_cp	150 uM	6 h	2	57	0.06	0.0591349	0	0	1	1	0	Benzodiazepine receptor antagonist	TSPO|NR1I2|NR1I3	-0.4308	1.5546	-1.6659
CPC014_ASC_24H:BRD-A67748489-001-06-8:10	BRD-A67748489	K-858	ASC	trt_cp	10 uM	24 h	3	135	0.35	0.219802	1	0	1	1	0	Kinesin inhibitor	KIF11	-0.4307	1.5536	-1.6653
CRCGN014_HEPG2_3H:BRD-K21680192:2.5	BRD-K21680192	mitoxantrone	HEPG2	trt_cp	2.5 uM	3 h	3	393	0.46	0.429938	0	0	1	1	0	Topoisomerase inhibitor	TOP2A|PIM1	-0.4306	1.5535	-1.6651
CPC014_MCF7_6H:N16	BRD-K85985071	ellipticine	MCF7	trt_cp	10 uM	6 h	5	416	0.5029	0.462507	1	1	1	1	0	Topoisomerase inhibitor	TOP2A|TOP2B	-0.4306	1.5529	-1.6649
REP.B011_PC3_24H:F01	BRD-A05186015	bupropion	PC3	trt_cp	2.22 uM	24 h	2	138	0.4397	0.249085	0	0	1	1	0	Dopamine receptor antagonist	SLC6A2|SLC6A3|CYP2B6|CHRNA3	-0.4306	1.5526	-1.6648
PBIOA021_A549_24H:C08	BRD-K87737963	CYT-387	A549	trt_cp	3.33 uM	24 h	3	267	0.42	0.338619	1	1	1	1	0	JAK inhibitor	JAK1|JAK2|JAK3	-0.4304	1.551	-1.6642
REP.B027_HELA_24H:N19	BRD-K99604664	tanaproget	HELA	trt_cp	2.22 uM	24 h	2	483	0.7431	0.605798	1	1	1	1	0	Progesterone receptor agonist	PGR	-0.4303	1.5497	-1.6636
REP.A017_HELA_24H:J19	BRD-A66155091	trilostane	HELA	trt_cp	10 uM	24 h	3	149	0.3364	0.226387	1	1	1	1	0	3beta-hydroxy-delta5-steroid dehydrogenase inhibitor	ESR2|ESR1|HSD3B2|JUN|NR3C1|HSD3B1	-0.4299	1.5457	-1.6624
MOAR002_PC3_24H:N13	BRD-K35601925	CS-917	PC3	trt_cp	10 uM	24 h	3	163	0.34	0.238048	1	1	1	1	0	Fructose biphosphate inhibitor	FBP1	-0.4296	1.5403	-1.6612
CPD002_MCF7_24H:BRD-K49481516-004-12-6:10	BRD-K49481516	galantamine	MCF7	trt_cp	10 uM	24 h	3	182	0.23	0.206886	1	0	1	1	0	Acetylcholinesterase inhibitor	ACHE|BCHE|CHRNA1|CHRNA10|CHRNA2|CHRNA3|CHRNA4|CHRNA5|CHRNA6|CHRNA7|CHRNA9|CHRNB1|CHRNB2|CHRNB3|CHRNB4|CHRND|CHRNE|CHRNG	-0.4295	1.539	-1.6608
CPC020_HA1E_6H:BRD-A84481105-003-25-5:10	BRD-A84481105	thioridazine	HA1E	trt_cp	10 uM	6 h	3	137	0.36	0.224565	1	1	1	1	0	Dopamine receptor antagonist	DRD2|HTR2A|DRD1|HTR2C|CHRNA7|MALT1|ADRA1A|ADRA1B|DRD3|DRD4|DRD5|HRH1|HTR1A|HTR6|HTR7|KCNH2	-0.4294	1.5369	-1.6604
CPC016_A549_24H:BRD-A63546914-003-01-2:10	BRD-A63546914	Ro-04-5595	A549	trt_cp	10 uM	24 h	3	103	0.23	0.155637	0	0	1	1	0	Glutamate receptor antagonist	GRIN2B	-0.4294	1.5369	-1.6604
CPC017_SKB_24H:BRD-A10355991-003-01-8:10	BRD-A10355991	norketamine	SKB	trt_cp	10 uM	24 h	2	145	0.31	0.214386	0	0	1	1	0	Glutamate receptor antagonist	CYP3A4	-0.4294	1.5361	-1.6602
CPC015_ASC_24H:BRD-K19136521-001-03-0:10	BRD-K19136521	BRD-K19136521	ASC	trt_cp	10 uM	24 h	4	300	0.3	0.303355	0	0	1	1	0	CDK inhibitor|GSK inhibitor	CDK1|CDK2|CDK5|CCNE1|CDK4|CDK9|LCK|LRRK1|LRRK2|CDK5R1|GSK3B	-0.4292	1.5341	-1.6597
CPC016_ASC_24H:BRD-K45401373-001-04-3:10	BRD-K45401373	betulinic-acid	ASC	trt_cp	10 uM	24 h	3	177	0.24	0.208412	1	0	1	1	0	Apoptosis stimulant|Caspase activator|Diacylglycerol O acyltransferase inhibitor|HIV inhibitor|NFKB activator|SARS coronavirus 3C-like protease inhibitor|Topoisomerase inhibitor	GPBAR1|CASP3|CASP8|TOP1	-0.4289	1.5277	-1.6585
CPC002_HCC515_6H:BRD-K09397065-003-03-8:10	BRD-K09397065	SR-57227A	HCC515	trt_cp	10 uM	6 h	3	355	0.08	0.170408	1	0	1	1	0	Serotonin receptor agonist	HTR3A	-0.4288	1.5257	-1.6581
CPC015_ASC_24H:BRD-K52075715-001-03-4:10	BRD-K52075715	oxibendazole	ASC	trt_cp	10 uM	24 h	4	377	0.19	0.270631	0	0	1	1	0	Tubulin inhibitor	TUBB|TUBB4B	-0.4287	1.5234	-1.6578
CPC004_HA1E_24H:BRD-K06712146-001-01-2:10	BRD-K06712146	YM-90709	HA1E	trt_cp	10 uM	24 h	3	115	0.23	0.164454	1	1	1	1	0	IL5 inhibitor	IL5RA|CSF2RB	-0.4287	1.5232	-1.6577
CPC017_ASC_24H:BRD-K37289225-001-19-0:10	BRD-K37289225	clozapine	ASC	trt_cp	10 uM	24 h	4	161	0.24	0.198769	1	0	1	1	0	Serotonin receptor antagonist|Dopamine receptor antagonist	DRD4|DRD2|DRD3|HTR2A|ADRA1A|ADRA1B|CHRM1|DRD1|HRH1|HRH4|HTR1A|HTR1B|HTR1D|HTR1E|HTR2C|HTR6|HTR7|CYP2C19|ADRA1D|ADRA2A|ADRA2B|ADRA2C|CALY|CHRM2|CHRM3|CHRM4|CHRM5|DRD5|HTR1F|HTR2B|HTR3A|HTR5A	-0.4286	1.5205	-1.6571
REP.B009_MCF10A_24H:M05	BRD-K32977963	eugenol	MCF10A	trt_cp	0.03 uM	24 h	2	45	0.1083	0.0705913	1	1	1	1	0	Androgen receptor antagonist	MAOA|AR	-0.4285	1.5185	-1.6568
CPC017_HEPG2_6H:BRD-A94756469-001-03-9:10	BRD-A94756469	digoxin	HEPG2	trt_cp	10 uM	6 h	3	362	0.54	0.447076	1	1	1	1	0	Na/K-ATPase inhibitor	ATP1A1|ABCB1|RORC|SLCO1B3	-0.4284	1.5171	-1.6566
CPC014_HA1E_6H:BRD-U33728988-000-01-6:10	BRD-U33728988	QL-X-138	HA1E	trt_cp	10 uM	6 h	3	356	0.47	0.413623	1	1	1	1	0	MTOR inhibitor	BTK|JAK3|MKNK2|MTOR|PRKDC	-0.4282	1.5085	-1.6556
CPC009_HA1E_6H:BRD-A47598013-001-03-4:10	BRD-A47598013	citalopram	HA1E	trt_cp	10 uM	6 h	3	334	0.43	0.383211	1	1	1	1	0	Serotonin receptor antagonist	SLC6A4|SLC6A2	-0.4279	1.4967	-1.6547
CPC018_SKB_24H:BRD-K63606607-001-01-8:10	BRD-K63606607	bufalin	SKB	trt_cp	10 uM	24 h	3	578	0.71	0.647774	0	0	1	1	0	Na/K-ATPase inhibitor	ATP1A1	-0.4279	1.4943	-1.6545
REP.A014_HEK293_24H:E21	BRD-A59174698	ritodrine	HEK293	trt_cp	1.11 uM	24 h	3	120	0.0613	0.0867264	0	0	1	1	0	Adrenergic receptor agonist	ADRB2	-0.4279	1.4918	-1.6544
REP.A003_MCF7_24H:B12	BRD-K31135544	IB-MECA	MCF7	trt_cp	0.04 uM	24 h	2	100	0.0555	0.0753316	0	0	1	1	0	Adenosine receptor agonist	ADORA3|ADORA1|ADORA2A|ADORA2B	-0.4276	1.4766	-1.6533
CPD003_MCF7_24H:H07	BRD-K60369935	ribavirin	MCF7	trt_cp	10 uM	24 h	3	190	0.3393	0.256743	1	1	1	1	0	Antiviral	IMPDH1|ADK|ENPP1|IMPDH2|NT5C2	-0.4275	1.4743	-1.6531
CPC006_U937_6H:BRD-K27316855-001-02-6:1	BRD-K27316855	calcitriol	U937	trt_cp	1.11 uM	6 h	2	66	0.4	0.164298	1	1	1	1	0	Vitamin D receptor agonist	VDR|CYP3A5	-0.4275	1.4711	-1.6528
CPC017_ASC_24H:BRD-K29173907-001-03-5:10	BRD-K29173907	isoflupredone-acetate	ASC	trt_cp	10 uM	24 h	3	236	0.24	0.240654	1	0	1	1	0	Glucocorticoid receptor agonist	NR3C1	-0.4274	1.4699	-1.6527
CPC018_SKB_24H:BRD-A11813248-003-01-6:10	BRD-A11813248	AM-92016	SKB	trt_cp	10 uM	24 h	3	447	0.22	0.3171	0	0	1	1	0	Potassium channel antagonist	GRIN2B|GRIN1	-0.4274	1.4677	-1.6525
REP.A026_A549_24H:N23	BRD-A99939097	carisoprodol	A549	trt_cp	0.125 uM	24 h	2	76	0.147	0.10688	0	0	1	1	0	Acetylcholine receptor antagonist	CYP2C19	-0.4274	1.4666	-1.6524
REP.B012_MCF7_24H:G07	BRD-A01636364	bupivacaine	MCF7	trt_cp	2.22 uM	24 h	2	42	0.1406	0.0777048	0	0	1	1	0	Sodium channel inhibitor	SCN9A|KCNA5|PTGER1|SCN10A|SCN4A	-0.4271	1.4533	-1.6513
REP.B013_HUVEC.A_24H:P22	BRD-K44353683	nateglinide	HUVEC	trt_cp	0.08 uM	24 h	2	175	0.0353	0.0794762	0	0	1	1	0	Insulin secretagogue	ABCC8|KCNJ11|CYP3A4|INS|KCNJ10|PPARG	-0.4268	1.4429	-1.6504
CRCGN004_HA1E_6H:BRD-K58685305-001-13-9:10	BRD-K58685305	emodin	HA1E	trt_cp	10 uM	6 h	3	110	0.06	0.082149	1	0	1	1	0	11-beta-HSD1 inhibitor	CSNK2A1|CSNK2A2|CSNK2B|IL6|PTP4A3	-0.4267	1.4394	-1.65
CPC014_PHH_24H:BRD-A80574334-001-01-9:10	BRD-A80574334	oxalomalic-acid	PHH	trt_cp	10 uM	24 h	4	415	0.33	0.374207	0	0	1	1	0	Isocitrate dehydrogenase inhibitor	ACO1|IDH1	-0.4263	1.4241	-1.6483
LJP002_HS578T_6H:BRD-K25340465-001-03-8:0.08	BRD-K25340465	OSI-930	HS578T	trt_cp	0.08 uM	6 h	3	123	0.3	0.194242	0	0	1	1	0	KIT inhibitor|VEGFR inhibitor	KIT|KDR|PDGFB|PDGFRB	-0.4261	1.4205	-1.6478
CPC015_ASC_24H:BRD-A58048407-001-09-7:10	BRD-A58048407	nimodipine	ASC	trt_cp	10 uM	24 h	4	212	0.25	0.232792	0	0	1	1	0	Calcium channel blocker	CACNA1C|NR3C2|CACNA1D|CACNA1F|CACNA1S|AHR|CACNB1|CACNB2|CACNB3|CACNB4|CFTR	-0.4257	1.4115	-1.6459
CPC017_A549_6H:BRD-K65639003-001-05-8:10	BRD-K65639003	icariin	A549	trt_cp	10 uM	6 h	3	200	0.38	0.278764	1	0	1	1	0	Phosphodiesterase inhibitor	NMUR2|SORD|PDE5A	-0.4256	1.4105	-1.6455
LJP009_CD34_24H:A21	BRD-A10523515	GSK-429286A	CD34	trt_cp	1.11 uM	24 h	3	234	0.5054	0.347741	1	1	1	1	0	Rho associated kinase inhibitor	ROCK1	-0.4255	1.4096	-1.6452
REP.A017_MCF10A_24H:L24	BRD-K67068943	ORE-1001	MCF10A	trt_cp	0.04 uM	24 h	3	82	0.0937	0.0886354	0	0	1	1	0	ACE inhibitor	ACE2	-0.4253	1.4075	-1.6444
CPC018_HEPG2_6H:BRD-A29082194-001-02-4:10	BRD-A29082194	gitoxigenin	HEPG2	trt_cp	10 uM	6 h	3	107	0.19	0.144178	1	0	1	1	0	Na/K-ATPase inhibitor	ATP1A1	-0.4251	1.4056	-1.6438
LIVB001_HUH7_72H:I22	BRD-K30240666	clemastine	HUH7	trt_cp	10 uM	72 h	3	134	0.2	0.165538	0	0	1	1	0	Histamine receptor antagonist	HRH1	-0.425	1.4047	-1.6435
REP.B007_MCF7_24H:J06	BRD-K52183142	pregnenolone	MCF7	trt_cp	0.01 uM	24 h	2	707	0.4446	0.566924	0	0	1	1	0	Glutamate receptor modulator	PGR|CYP17A1|SULT2B1	-0.4248	1.4031	-1.6427
LJP005_HS578T_3H:N13	BRD-K81528515	nilotinib	HS578T	trt_cp	10 uM	3 h	2	74	0.1304	0.0993311	1	1	1	1	0	Bcr-Abl inhibitor|Abl inhibitor	ABL1|KIT|BCR|CYP2B6|CYP2C8|DDR1|DDR2|PDGFRA	-0.4247	1.4016	-1.6422
CPC018_ASC_24H:BRD-K44067360-001-16-2:10	BRD-K44067360	flufenamic-acid	ASC	trt_cp	10 uM	24 h	3	471	0.47	0.475762	0	0	1	1	0	Chloride channel blocker	AKR1C3|AR|PTGS1|PTGS2|ANO1|GJA1|GJA10|GJA3|GJA4|GJA5|GJA8|GJA9|GJB1|GJB2|GJB3|GJB4|GJB5|GJB6|GJB7|GJC1|GJC2|GJC3|GJD2|GJD3|GJD4|GJE1|PANX1|PANX2|PANX3|PKD2L1|TRPC5|TRPM2|TRPM5	-0.4247	1.4017	-1.6422
PAC002_U2OS_6H:BRD-K57432881-003-04-4:10	BRD-K57432881	tiapride	U2OS	trt_cp	10 uM	6 h	2	43	0.32	0.118615	0	0	1	1	0	Dopamine receptor antagonist	DRD2|DRD3	-0.4246	1.4011	-1.6418
CPC018_ASC_24H:BRD-K25906698-303-01-9:10	BRD-K25906698	immepip	ASC	trt_cp	10 uM	24 h	3	309	0.36	0.337257	1	0	1	1	0	Histamine receptor agonist	HRH3|HRH4	-0.4245	1.4004	-1.6415
CPC004_HCC515_24H:BRD-K36055864-001-09-3:10	BRD-K36055864	cycloheximide	HCC515	trt_cp	10 uM	24 h	3	485	0.76	0.613915	1	1	1	1	0	Protein synthesis inhibitor	GSK3B|RPL3	-0.4245	1.4006	-1.6415
REP.A012_HELA_24H:F01	BRD-K00911143	brexpiprazole	HELA	trt_cp	10 uM	24 h	2	210	0.322	0.262947	1	1	1	1	0	Dopamine receptor antagonist	DRD2|HTR1A|HTR2A|DRD3	-0.4245	1.4004	-1.6414
LJP001_HS578T_24H:BRD-K04923131-001-10-5:10	BRD-K04923131	BRD-K04923131	HS578T	trt_cp	10 uM	24 h	3	235	0.44	0.325155	0	0	1	1	0	GSK inhibitor|Lipoxygenase inhibitor	GSK3B|ALOX5|GSK3A	-0.4244	1.3994	-1.6409
CVD001_HUH7_6H:BRD-K85985071-001-16-5:2.5	BRD-K85985071	ellipticine	HUH7	trt_cp	2.5 uM	6 h	3	222	0.34	0.277809	0	0	1	1	0	Topoisomerase inhibitor	TOP2A|TOP2B	-0.4244	1.3994	-1.6409
CPC014_HT29_6H:BRD-K08115555-001-04-4:10	BRD-K08115555	BRD-K08115555	HT29	trt_cp	10 uM	6 h	5	138	0.19	0.163737	0	0	1	1	0	TNF inhibitor	TNF	-0.4243	1.3986	-1.6406
CPC005_PC3_24H:BRD-K55424922-003-01-0:10	BRD-K55424922	anpirtoline	PC3	trt_cp	10 uM	24 h	5	168	0.09	0.124339	1	0	1	1	0	Serotonin receptor agonist	HTR1B|HTR3A	-0.4243	1.3984	-1.6405
CPC016_A549_24H:BRD-K91699951-001-03-7:10	BRD-K91699951	benzonatate	A549	trt_cp	10 uM	24 h	3	235	0.25	0.245095	0	0	1	1	0	Anesthetic - local	SCN5A	-0.4242	1.3983	-1.6403
CPC015_ASC_24H:BRD-A34806832-001-02-7:10	BRD-A34806832	proscillaridin	ASC	trt_cp	10 uM	24 h	4	600	0.65	0.631485	0	0	1	1	0	Na/K-ATPase inhibitor	ATP1A1	-0.4242	1.3979	-1.6401
REP.A018_THP1_24H:B18	BRD-K62200014	anagrelide	THP1	trt_cp	0.04 uM	24 h	2	180	0.1423	0.161834	0	0	1	1	0	Phosphodiesterase inhibitor	PDE3A	-0.4241	1.3978	-1.6398
PBIOA017_HCC515_24H:N01	BRD-K16478699	PLX-4720	HCC515	trt_cp	10 uM	24 h	3	436	0.6	0.517189	1	1	1	1	0	RAF inhibitor	BRAF|KDR	-0.424	1.3971	-1.6394
CPC003_HA1E_6H:BRD-K70241288-001-01-1:10	BRD-K70241288	L-692585	HA1E	trt_cp	10 uM	6 h	2	61	0.13	0.0900466	1	1	1	1	0	Growth hormone releasing peptide ligand agonist	GHSR	-0.4239	1.3966	-1.6392
CPC016_A375_6H:BRD-K95202259-001-01-9:10	BRD-K95202259	ML-3163	A375	trt_cp	10 uM	6 h	5	161	0.22	0.190307	0	0	1	1	0	P38 MAPK inhibitor	MAPK14	-0.4238	1.3965	-1.6387
CPC006_NCIH2073_6H:BRD-A45889380-300-04-8:10	BRD-A45889380	mepacrine	NCIH2073	trt_cp	10 uM	6 h	2	325	0.54	0.423613	0	0	1	1	0	NFKB inhibitor|Cytokine production inhibitor|p53 activator	TP53|AKT1|MTOR|NFKB1|PLA2G2A|PLA2G2D|PLA2G1B|PLA2G4A|PLA2G6|PLCL1	-0.4237	1.3965	-1.6383
CPC014_SKB_24H:BRD-K98372770-001-04-1:10	BRD-K98372770	L-2167	SKB	trt_cp	10 uM	24 h	4	146	0.23	0.185298	0	0	1	1	0	PPAR receptor agonist	PPARD	-0.4236	1.3965	-1.638
CPC017_NPC_24H:BRD-K67298865-001-03-3:10	BRD-K67298865	SB-431542	NPC	trt_cp	10 uM	24 h	4	472	0.09	0.208412	0	0	1	1	0	TGF-beta receptor inhibitor	TGFBR1|ACVR1C|ACVR1B	-0.4236	1.3965	-1.638
CPC006_HCT116_6H:BRD-K48692744-001-01-2:10	BRD-K48692744	NU-1025	HCT116	trt_cp	10 uM	6 h	2	322	0.08	0.162294	1	0	1	1	0	PARP inhibitor|DNA dependent protein kinase inhibitor	PARP1	-0.4235	1.3965	-1.6374
REP.B008_YAPC_24H:C01	BRD-K36740062	GSK-1070916	YAPC	trt_cp	2.22 uM	24 h	2	203	0.4888	0.318525	1	1	1	1	0	Aurora kinase inhibitor	AURKB|AURKC|AURKA|CYP2D6|CYP3A4	-0.4234	1.3965	-1.6372
CPC018_SKB_24H:BRD-A56012032-001-05-6:10	BRD-A56012032	thiorphan	SKB	trt_cp	10 uM	24 h	2	102	0.2	0.144426	0	0	1	1	0	Membrane integrity inhibitor	MME	-0.4229	1.3965	-1.6353
REP.A007_HELA_24H:J01	BRD-K52183142	pregnenolone	HELA	trt_cp	10 uM	24 h	3	391	0.7076	0.531879	1	1	1	1	0	Glutamate receptor modulator	PGR|CYP17A1|SULT2B1	-0.4229	1.3965	-1.6351
NMH002_NEU_6H:BRD-A48430263-001-05-1:10	BRD-A48430263	pioglitazone	NEU	trt_cp	10 uM	6 h	3	93	0.14	0.115381	0	0	1	1	0	PPAR receptor agonist|Insulin sensitizer	PPARG|INS|TRPM3	-0.4227	1.3965	-1.6345
REP.A028_PC3_24H:H01	BRD-K93944989	safingol	PC3	trt_cp	1.11 uM	24 h	2	75	0.1753	0.115945	0	0	1	1	0	PKC inhibitor	PRKCA|TRPM3	-0.4227	1.3965	-1.6344
REP.A014_HELA_24H:H07	BRD-K59573506	BRD-K59573506	HELA	trt_cp	10 uM	24 h	3	408	0.7024	0.541319	1	1	1	1	0	Androgen receptor antagonist|Progesterone receptor agonist|Testosterone receptor antagonist	AR|ADORA1	-0.4225	1.3958	-1.6336
PAC001_U2OS_6H:BRD-K68392338-003-01-2:10	BRD-K68392338	ZK-93426	U2OS	trt_cp	10 uM	6 h	2	43	0.02	0.0296538	0	0	1	1	0	Benzodiazepine receptor antagonist	GABRA1|GABRA2|GABRA3|GABRA5	-0.4224	1.3951	-1.6331
REP.A025_A375_24H:K02	BRD-K76210423	resiquimod	A375	trt_cp	3.33 uM	24 h	3	90	0.148	0.116703	1	0	1	1	0	TLR agonist	TLR7|TLR8	-0.4223	1.395	-1.6329
CPC014_HT29_6H:BRD-A80775386-001-01-9:10	BRD-A80775386	hyperforin	HT29	trt_cp	10 uM	6 h	5	168	0.13	0.149437	1	0	1	1	0	Cyclooxygenase inhibitor|Dopamine uptake inhibitor|Interleukin inhibitor|Lipoxygenase inhibitor|Serotonin reuptake inhibitor	NR1I2|ALOX5|PTGS1	-0.4221	1.3938	-1.6322
CPC014_SKB_24H:BRD-K99545815-001-01-4:10	BRD-K99545815	PF-562271	SKB	trt_cp	10 uM	24 h	4	587	0.58	0.590016	0	0	1	1	0	Focal adhesion kinase inhibitor	PTK2|PTK2B	-0.4221	1.3934	-1.632
REP.A003_A549_24H:C07	BRD-K31731454	pemirolast	A549	trt_cp	10 uM	24 h	3	119	0.1378	0.129488	0	0	1	1	0	Mediator release inhibitor	HRH1	-0.4217	1.3867	-1.6306
REP.B012_PC3_24H:G01	BRD-K01577834	adenosine	PC3	trt_cp	2.22 uM	24 h	2	111	0.3681	0.204397	0	0	1	1	0	Adenosine receptor agonist	ADORA1|ADORA2A|ADORA2B|ADORA3|PI4K2A|PI4K2B|TRPM4	-0.4217	1.3867	-1.6306
LJP007_ASC_24H:D01	BRD-K80700417	SGI-1776	ASC	trt_cp	10 uM	24 h	3	180	0.3923	0.268705	0	0	1	1	0	PIM inhibitor	PIM1|FLT3|PIM2|PIM3	-0.4217	1.3856	-1.6304
REP.B015_PC3_24H:J24	BRD-K59037100	oxybenzone	PC3	trt_cp	0.01 uM	24 h	2	208	0.3816	0.284883	1	1	1	1	0	Lipase inhibitor	LIPE	-0.4216	1.385	-1.6303
PBIOA013_PC3_24H:D02	BRD-K25325018	GSK-690693	PC3	trt_cp	3.33 uM	24 h	3	239	0.39	0.308718	1	1	1	1	0	AKT inhibitor	AKT1|AKT2|AKT3|PAK4|PAK6|PAK7|PRKCQ|PRKG1|PRKX	-0.4213	1.3725	-1.6292
CPC004_HA1E_24H:BRD-K36055864-001-09-3:10	BRD-K36055864	cycloheximide	HA1E	trt_cp	10 uM	24 h	3	561	0.8	0.677418	1	1	1	1	0	Protein synthesis inhibitor	GSK3B|RPL3	-0.4212	1.3725	-1.6285
LJP007_CD34_24H:C02	BRD-K53414658	tivozanib	CD34	trt_cp	3.33 uM	24 h	3	340	0.4741	0.40598	1	1	1	1	0	VEGFR inhibitor	FLT1|FLT4|KDR|KIT|PDGFRA|PDGFRB	-0.4211	1.3725	-1.6283
CPC005_A549_24H:BRD-K83302049-003-01-2:10	BRD-K83302049	protopine	A549	trt_cp	10 uM	24 h	2	520	0.14	0.272833	0	0	1	1	0	Histamine receptor antagonist	ACHE	-0.4211	1.3725	-1.6281
CPC015_SKB_24H:BRD-K26801045-001-01-1:10	BRD-K26801045	pipamperone	SKB	trt_cp	10 uM	24 h	2	257	0.06	0.125566	0	0	1	1	0	Dopamine receptor antagonist	DRD2|HTR2A|HRH1|HTR1A|HTR1B|HTR1D	-0.421	1.3725	-1.628
CPC014_HA1E_6H:BRD-K14681867-015-01-6:10	BRD-K14681867	somatostatin	HA1E	trt_cp	10 uM	6 h	3	90	0.22	0.142286	1	0	1	1	0	Somatostatin receptor agonist	SSTR1|SSTR2|SSTR3|SSTR4|SSTR5|GH1|GHR|OPRD1|OPRM1	-0.4209	1.3725	-1.6275
REP.A020_YAPC_24H:N19	BRD-K48722258	dilazep	YAPC	trt_cp	10 uM	24 h	3	178	0.3455	0.250764	1	1	1	1	0	Adenosine receptor antagonist	SLC29A1|CACNA1C	-0.4209	1.3725	-1.6275
CPC015_SKB_24H:BRD-K21450440-001-08-8:10	BRD-K21450440	benzthiazide	SKB	trt_cp	10 uM	24 h	2	237	0.34	0.287041	0	0	1	1	0	Carbonic anhydrase inhibitor	CA2|SLC12A3|CA1|CA12|CA4|CA9	-0.4208	1.3725	-1.6272
PBIOA015_HEPG2_24H:A11	BRD-K64402243	ivachtin	HEPG2	trt_cp	0.125 uM	24 h	2	82	0.29	0.155932	1	1	1	1	0	Caspase inhibitor	CASP3	-0.4201	1.3725	-1.6244
LJP008_SKL_24H:K19	BRD-K88560311	rucaparib	SKL	trt_cp	10 uM	24 h	3	217	0.1705	0.194501	1	0	1	1	0	PARP inhibitor	PARP1|PARP2	-0.42	1.3725	-1.624
CPC006_VCAP_6H:BRD-K12762134-001-01-3:11.1	BRD-K12762134	XAV-939	VCAP	trt_cp	12 uM	6 h	4	206	0.22	0.215266	1	1	1	1	0	Tankyrase inhibitor	TNKS|TNKS2	-0.4199	1.3725	-1.6237
CPC017_A549_6H:BRD-A28318179-003-03-6:10	BRD-A28318179	aminomethyltransferase	A549	trt_cp	10 uM	6 h	3	99	0.26	0.162231	1	0	1	1	0	Nitric oxide synthase inhibitor	NOS2	-0.4199	1.3725	-1.6237
CPC010_A375_6H:M20	BRD-K00234327	RU-24969	A375	trt_cp	10 uM	6 h	3	284	0.1484	0.20759	1	0	1	1	0	Serotonin receptor agonist	HTR1A|HTR1B|HTR6|HTR1D|HTR2A|HTR2B|HTR2C|HTR5A	-0.4199	1.3725	-1.6234
LKCP002_A549_48H:L21	BRD-A64808605	AH-11110	A549	trt_cp	0.12 uM	48 h	5	80	0.1519	0.111469	1	0	1	1	0	Adrenergic receptor antagonist	ADRA1B	-0.4198	1.3725	-1.6231
CPC013_SKB_24H:BRD-K35687265-236-01-8:10	BRD-K35687265	ON-01910	SKB	trt_cp	10 uM	24 h	4	281	0.12	0.185684	0	0	1	1	0	PLK inhibitor	PLK1|CDK1|FLT1|FYN|PDGFRA|PLK2|SRC	-0.4194	1.3725	-1.6216
CPC004_A375_6H:BRD-K94512704-001-02-1:10	BRD-K94512704	spiramide	A375	trt_cp	10 uM	6 h	3	91	0.31	0.169837	1	0	1	1	0	Dopamine receptor antagonist|Serotonin receptor antagonist	HTR2A|HTR1A	-0.4193	1.3725	-1.6214
CPC006_HT29_24H:BRD-A63646118-001-01-8:151.2	BRD-A63646118	fumonisin-b1	HT29	trt_cp	150 uM	24 h	4	66	0.22	0.121847	1	0	1	1	0	Sphingosine kinase inhibitor	CERS1	-0.4193	1.3725	-1.6214
REP.B013_PC3_24H:M17	BRD-K43164539	cholic-acid	PC3	trt_cp	0.03 uM	24 h	2	76	0.2379	0.135967	0	0	1	1	0	Bile acid	CES1|FECH|PLA2G1B|ADH1C|COX1|COX2|COX3|COX4I1|COX5A|COX5B|COX6A2|COX6B1|COX6C|COX7A1|COX7B|COX7C|COX8A|ESRRG|FABP6|GPBAR1	-0.4193	1.3725	-1.6212
CPC006_A375_24H:BRD-K11853856-003-01-3:10	BRD-K11853856	PJ-34	A375	trt_cp	10 uM	24 h	5	203	0.33	0.261719	1	1	1	1	0	PARP inhibitor	EEF2|PARP1|PARP15|PARP3	-0.4192	1.3725	-1.6208
EMU001_HBL1_24H:D23	BRD-K35458079	edaravone	HBL1	trt_cp	0.04 uM	24 h	3	171	0.211	0.192075	1	0	1	1	0	Nootropic agent	BCL2	-0.4191	1.3725	-1.6205
CPC014_A549_6H:BRD-U33728988-000-01-6:10	BRD-U33728988	QL-X-138	A549	trt_cp	10 uM	6 h	3	179	0.36	0.25669	1	1	1	1	0	MTOR inhibitor	BTK|JAK3|MKNK2|MTOR|PRKDC	-0.4187	1.3725	-1.6189
CPC016_SKB_24H:BRD-K37865504-001-01-7:10	BRD-K37865504	LY-2183240	SKB	trt_cp	10 uM	24 h	3	224	0.46	0.324589	1	1	1	1	0	FAAH inhibitor	FAAH	-0.4184	1.3725	-1.6179
CPC017_ASC_24H:BRD-K04414442-001-03-4:10	BRD-K04414442	SB-222200	ASC	trt_cp	10 uM	24 h	4	323	0.22	0.269552	1	0	1	1	0	Tachykinin antagonist	TACR3	-0.4184	1.3725	-1.6178
CPC018_SKB_24H:BRD-A91699651-316-06-7:10	BRD-A91699651	chloroquine	SKB	trt_cp	10 uM	24 h	3	207	0.26	0.234586	0	0	1	1	0	Antimalarial	CYP2C8|GSTA2|MRGPRX1|TLR9|TNF	-0.4183	1.3725	-1.6173
CPC006_SW480_6H:BRD-A02006392-001-09-9:10	BRD-A02006392	nitrendipine	SW480	trt_cp	10 uM	6 h	2	71	0.06	0.0659987	0	0	1	1	0	Calcium channel blocker	CACNA1C|CACNA1D|CACNA2D1|CACNA1H|CACNA1S|CACNA2D2|CACNB2|CACNG1|KCNN4	-0.4181	1.3725	-1.6167
LJP007_CD34_24H:G01	BRD-K21718444	KW-2449	CD34	trt_cp	10 uM	24 h	3	508	0.6396	0.57639	0	0	1	1	0	Abl inhibitor|Aurora kinase inhibitor|FLT3 inhibitor	FLT3|ABL1|AURKA|FGFR1|AURKB	-0.4181	1.3725	-1.6166
LJP006_HA1E_24H:B10	BRD-K23984367	sorafenib	HA1E	trt_cp	0.37 uM	24 h	3	156	0.43	0.261895	1	1	1	1	0	RAF inhibitor|FLT3 inhibitor|KIT inhibitor|PDGFR inhibitor|RET inhibitor|VEGFR inhibitor	RET|BRAF|FLT3|KDR|RAF1|FLT1|FLT4|KIT|DDR2|PDGFRB|FGFR1|CYP2B6|CYP2C8|CYP3A5|PDGFB|SLCO1B3	-0.4176	1.3725	-1.6147
MOAR001_PC3_24H:A22	BRD-K71603915	EVP-6124	PC3	trt_cp	10 uM	24 h	3	211	0.43	0.304583	1	1	1	1	0	Acetylcholine receptor agonist	CHRNA7	-0.4176	1.3725	-1.6146
CPC015_SKB_24H:BRD-A34806832-001-02-7:10	BRD-A34806832	proscillaridin	SKB	trt_cp	10 uM	24 h	2	514	0.62	0.570832	0	0	1	1	0	Na/K-ATPase inhibitor	ATP1A1	-0.4173	1.3725	-1.6137
REP.B014_HELA_24H:I07	BRD-A55393291	testosterone	HELA	trt_cp	2.22 uM	24 h	2	429	0.6526	0.535036	1	1	1	1	0	Androgen receptor agonist	AR|CYP2C19|CYP2C8|CYP3A5|CYP19A1	-0.4173	1.3725	-1.6135
CPC018_PHH_24H:BRD-A50311610-300-06-2:10	BRD-A50311610	meclizine	PHH	trt_cp	10 uM	24 h	3	113	0.16	0.135966	0	0	1	1	0	Constitutive androstane receptor (CAR) agonist	NR1I3|HRH1	-0.4172	1.3725	-1.6132
REP.B015_PC3_24H:B08	BRD-K55748775	SCH-28080	PC3	trt_cp	0.74 uM	24 h	2	114	0.238	0.16656	1	1	1	1	0	ATPase inhibitor	ATP4A	-0.4171	1.3725	-1.6129
CPC018_HEPG2_6H:BRD-K13261168-001-01-4:10	BRD-K13261168	LY-16350	HEPG2	trt_cp	10 uM	6 h	3	135	0.24	0.182013	1	0	1	1	0	Dopamine receptor agonist	DRD2|DRD3	-0.4171	1.3725	-1.6126
CPC017_SKB_24H:BRD-K91509126-001-04-6:10	BRD-K91509126	piceatannol	SKB	trt_cp	10 uM	24 h	2	78	0.12	0.0978292	0	0	1	1	0	Syk inhibitor	PTGS2|SIRT1|SYK|TYR|ATP5A1|ATP5B|ATP5C1|IRF3	-0.417	1.3725	-1.6123
REP.A010_PC3_24H:K24	BRD-A14798026	mestranol	PC3	trt_cp	0.04 uM	24 h	3	150	0.2409	0.192218	0	0	1	1	0	Estrogen receptor agonist	ESR1	-0.4166	1.3725	-1.6108
REP.A005_A375_24H:A13	BRD-A07986123	galeterone	A375	trt_cp	10 uM	24 h	3	168	0.3024	0.227917	1	1	1	1	0	Androgen receptor antagonist	AR|CYP17A1	-0.4165	1.3725	-1.6105
CPC005_PC3_24H:BRD-K19507340-001-03-1:10	BRD-K19507340	megestrol-acetate	PC3	trt_cp	10 uM	24 h	5	246	0.26	0.255732	1	0	1	1	0	Progesterone receptor agonist|DNA inhibitor|Steroidal progestin	PGR|NR3C1	-0.4164	1.3725	-1.61
REP.A009_YAPC_24H:F17	BRD-A29854054	lorglumide	YAPC	trt_cp	0.125 uM	24 h	2	809	0.7697	0.797931	0	0	1	1	0	CCK receptor antagonist	CCKAR|CCKBR	-0.4164	1.3725	-1.6099
REP.A024_A375_24H:P17	BRD-K79602928	metformin	A375	trt_cp	0.125 uM	24 h	2	100	0.0834	0.092345	1	1	1	1	0	Insulin sensitizer	INS|ACACB|PRKAB1	-0.4162	1.3725	-1.6095
CPC014_PHH_24H:BRD-A74904029-001-05-7:10	BRD-A74904029	EI-231	PHH	trt_cp	10 uM	24 h	4	296	0.3	0.301326	0	0	1	1	0	Casein kinase inhibitor	CSNK2A1	-0.4162	1.3725	-1.6094
CPC017_ASC_24H:BRD-K76674262-001-01-7:10	BRD-K76674262	BRD-K76674262	ASC	trt_cp	10 uM	24 h	4	628	0.84	0.734429	1	1	1	1	0	Protein synthesis inhibitor	RPL3	-0.4162	1.3725	-1.6092
PBIOA013_HCC515_24H:O07	BRD-K37798499	etoposide	HCC515	trt_cp	10 uM	24 h	3	478	0.74	0.601396	1	1	1	1	0	Topoisomerase inhibitor	TOP2A|TOP2B|CYP2E1|CYP3A5	-0.4161	1.3725	-1.6089
REP.B006_MCF7_24H:A18	BRD-K18922609	neostigmine	MCF7	trt_cp	0.01 uM	24 h	2	142	0.2641	0.195821	0	0	1	1	0	Acetylcholinesterase inhibitor	ACHE	-0.416	1.3725	-1.6087
CPC006_PC3_24H:C02	BRD-K59184148	SB-216763	PC3	trt_cp	10 uM	24 h	5	230	0.3546	0.288778	1	1	1	1	0	GSK inhibitor	GSK3B|CCNA2|CDK2|GSK3A	-0.416	1.3725	-1.6084
CPC002_HCC515_24H:BRD-K82823076-001-01-8:10	BRD-K82823076	Ro-15-4513	HCC515	trt_cp	10 uM	24 h	3	76	0.23	0.133691	1	0	1	1	0	GABA receptor agonist	GABRA1|GABRA2|GABRA3|GABRA5|GABRA4|GABRA6|GABRB2|GABRG2	-0.4159	1.3725	-1.6083
CPC016_A375_6H:BRD-K62736196-015-03-7:10	BRD-K62736196	guanaben-acetate	A375	trt_cp	10 uM	6 h	5	235	0.14	0.183412	0	0	1	1	0	Adrenergic receptor agonist	ADRA2A|ADRA2B|ADRA2C	-0.4158	1.3725	-1.6078
REP.A015_HELA_24H:M13	BRD-A51078674	diclofensine	HELA	trt_cp	10 uM	24 h	3	371	0.635	0.4908	1	1	1	1	0	Dopamine receptor antagonist	SLC6A3|DRD1|MAOA|MAOB	-0.4157	1.3725	-1.6074
REP.A011_HELA_24H:C02	BRD-A04352665	maraviroc	HELA	trt_cp	3.33 uM	24 h	3	235	0.4681	0.335377	0	0	1	1	0	CC chemokine receptor antagonist	CCR5|CYP3A5	-0.4154	1.3725	-1.6062
REP.B001_YAPC_24H:L21	BRD-K29359156	ebselen	YAPC	trt_cp	0.25 uM	24 h	2	112	0.102	0.108079	0	0	1	1	0	Cyclooxygenase inhibitor|Glutathione peroxidase agonist|H+/K+-ATPase inhibitor|Nitric oxide synthase inhibitor	LTB4R|NOX3|ALB	-0.4153	1.3725	-1.6058
REP.B013_HUVEC.A_24H:B16	BRD-K38744518	betulinic-acid	HUVEC	trt_cp	0.08 uM	24 h	2	239	0.021	0.0716373	0	0	1	1	0	Apoptosis stimulant|Caspase activator|Diacylglycerol O acyltransferase inhibitor|HIV integrase inhibitor|NFKB activator|SARS coronavirus 3C-like protease inhibitor|Topoisomerase inhibitor	GPBAR1|CASP3|CASP8|TOP1	-0.4153	1.3725	-1.6058
PAC002_U2OS_6H:BRD-K43245338-001-02-4:13.0735	BRD-K43245338	MDL-28170	U2OS	trt_cp	12.5 uM	6 h	2	21	0.16	0.0586138	0	0	1	1	0	Calpain inhibitor	CTSB|CAPN1	-0.4153	1.3725	-1.6056
CPC006_HCC515_24H:C16	BRD-K78126613	menadione	HCC515	trt_cp	10 uM	24 h	5	233	0.4069	0.311353	1	1	1	1	0	Mitochondrial inhibitor|Phosphatase inhibitor	PKM|AOX1|BGLAP|F10|F2|F7|F9|GGCX|NQO1|NQO2|PROC|PROS1|PROZ|VKORC1|VKORC1L1	-0.4153	1.3725	-1.6056
LCP001_MCF10A.WT_24H:F18	BRD-K62814476	BMS-265246	MCF10A	trt_cp	1.11 uM	24 h	3	127	0.52	0.259857	1	1	1	1	0	CDK inhibitor	CDK1|CDK2|CCNE1	-0.4152	1.3725	-1.6055
CPC018_NPC_24H:BRD-A97730597-003-03-2:10	BRD-A97730597	hexylcaine	NPC	trt_cp	10 uM	24 h	3	154	0.23	0.190307	0	0	1	1	0	Sodium channel inhibitor	SCN5A|SCN10A	-0.4152	1.3725	-1.6053
CPC005_A375_24H:BRD-K51541829-001-01-3:10	BRD-K51541829	Ro-25-6981	A375	trt_cp	10 uM	24 h	3	183	0.26	0.220568	1	0	1	1	0	Vesicular monoamine transporter inhibitor	GRIN2B|SLC18A2	-0.4151	1.3725	-1.6052
CPC015_SKB_24H:BRD-K46018455-001-17-7:10	BRD-K46018455	bezafibrate	SKB	trt_cp	10 uM	24 h	2	115	0.04	0.0685819	0	0	1	1	0	PPAR receptor agonist	PPARA|PPARD|PPARG|HSD11B1|LPL	-0.415	1.3725	-1.6046
AICHI001_SKMEL5_24H:H01	BRD-K53972329	ruxolitinib	SKMEL5	trt_cp	10 uM	24 h	3	225	0.24	0.234978	1	1	1	1	0	JAK inhibitor	JAK1|JAK2|TYK2|JAK3	-0.415	1.3725	-1.6045
REP.A008_HELA_24H:G01	BRD-K60038276	irbesartan	HELA	trt_cp	10 uM	24 h	3	166	0.4524	0.277106	0	0	1	1	0	Angiotensin receptor antagonist	AGTR1|JUN|SLC10A1	-0.4149	1.3725	-1.6044
CPC006_SW480_6H:BRD-K73397362-001-03-3:44.4	BRD-K73397362	purmorphamine	SW480	trt_cp	40 uM	6 h	2	158	0.29	0.21645	0	0	1	1	0	Smoothened receptor agonist	SMO|DHH|IHH|PTCH1	-0.4146	1.3725	-1.6033
CPC017_HEPG2_6H:BRD-K09549677-300-01-8:10	BRD-K09549677	mibefradil	HEPG2	trt_cp	10 uM	6 h	3	241	0.4	0.313956	1	1	1	1	0	Calcium channel blocker	CACNA1H|CACNA1G|CACNA1C|CACNA1I|SCN2A|SCN4A|SCN5A|SCN9A|ANO1|CACNA1D|CACNA1F|CACNA1S|CACNB1|CACNB2|CACNB3|CACNB4|CATSPER1|CATSPER2|CATSPER3|CATSPER4	-0.4146	1.3725	-1.6033
MOAR007_PC3_24H:A10	BRD-K40758068	efavirenz	PC3	trt_cp	10 uM	24 h	3	124	0.27	0.185022	1	1	1	1	0	HIV inhibitor	CYP2B6|CYP2C19|CYP3A4|CYP2C8|CYP3A5|CYP1A2|CYP2C9|CYP2D6	-0.4145	1.3725	-1.6026
PBIOA016_HCC515_24H:A13	BRD-K33106058	cytarabine	HCC515	trt_cp	10 uM	24 h	3	600	0.75	0.678323	1	1	1	1	0	Ribonucleotide reductase inhibitor	POLA1|POLB|POLD1|POLE	-0.4144	1.3725	-1.6022
LJP009_CD34_24H:I19	BRD-K11267252	alectinib	CD34	trt_cp	10 uM	24 h	3	313	0.5541	0.421111	1	1	1	1	0	ALK inhibitor	ALK|MET	-0.4144	1.3725	-1.6022
REP.B008_HT29_24H:C01	BRD-K36740062	GSK-1070916	HT29	trt_cp	2.22 uM	24 h	2	448	0.6064	0.527047	0	0	1	1	0	Aurora kinase inhibitor	AURKB|AURKC|AURKA|CYP2D6|CYP3A4	-0.4143	1.3725	-1.6018
CPC017_SKB_24H:BRD-A25687296-300-03-5:10	BRD-A25687296	emetine	SKB	trt_cp	10 uM	24 h	2	356	0.55	0.447442	0	0	1	1	0	Protein synthesis inhibitor	RPS2	-0.4142	1.3725	-1.6017
LJP001_HS578T_6H:BRD-K22096725-001-02-7:10	BRD-K22096725	ALW-II-49-7	HS578T	trt_cp	10 uM	6 h	3	357	0.39	0.377309	0	0	1	1	0	Ephrin inhibitor	DDR1	-0.4142	1.3725	-1.6014
REP.B006_HA1E_24H:H01	BRD-K20738689	dazmegrel	HA1E	trt_cp	2.22 uM	24 h	2	346	0.5411	0.43753	1	1	1	1	0	Thromboxane synthase inhibitor	TBXAS1	-0.4141	1.3725	-1.6011
LPROT004_YAPC_6H:BRD-K27305650:10	BRD-K27305650	LY-294002	YAPC	trt_cp	10 uM	6 h	3	315	0.7	0.474826	1	1	1	1	0	MTOR inhibitor|DNA dependent protein kinase inhibitor|Phosphodiesterase inhibitor|PLK inhibitor	MTOR|PIK3CD|PIK3CG|PIK3CA|PLK1|PRKDC|PIK3CB|PDE2A|AKT1|CHEK1|GSK3B|LCK|MAPK1|MAPK11|MAPK12|MAPK14|MAPK8|PRKCA|ROCK1|RPS6KB1|SGK1	-0.414	1.3725	-1.6009
REP.A018_A549_24H:B10	BRD-A62071884	siguazodan	A549	trt_cp	0.37 uM	24 h	2	75	0.0583	0.0668645	1	1	1	1	0	Phosphodiesterase inhibitor	PDE3A	-0.414	1.3725	-1.6008
PBIOA018_HA1E_24H:A14	BRD-A10523515	GSK-429286A	HA1E	trt_cp	3.33 uM	24 h	3	183	0.34	0.252229	1	1	1	1	0	Rho associated kinase inhibitor	ROCK1	-0.4139	1.3725	-1.6003
REP.B008_MCF10A_24H:J24	BRD-K92731339	perindopril	MCF10A	trt_cp	0.01 uM	24 h	2	127	0.1589	0.143646	0	0	1	1	0	ACE inhibitor	ACE	-0.4137	1.3725	-1.5995
ASG003_U2OS_24H:K04	BRD-K92723993	imatinib	U2OS	trt_cp	10 uM	24 h	5	135	0.4154	0.239459	0	0	1	1	0	PDGFR inhibitor|Bcr-Abl inhibitor|KIT inhibitor	ABL1|KIT|PDGFRA|BCR|CSF1R|PDGFRB|ABCG2|CYP2C19|CYP2C8|CYP3A5|DDR1|NTRK1|RET	-0.4133	1.3725	-1.5981
CPC006_NCIH2073_6H:BRD-A97437073-001-03-1:80	BRD-A97437073	rosiglitazone	NCIH2073	trt_cp	80 uM	6 h	2	71	0.16	0.107775	0	0	1	1	0	PPAR receptor agonist|Insulin sensitizer	PPARG|CYP2C8|INS|ACSL4|FFAR1|TRPC5|TRPM3	-0.4132	1.3725	-1.5979
CVD001_HEPG2_6H:BRD-K85985071-001-16-5:2.5	BRD-K85985071	ellipticine	HEPG2	trt_cp	2.5 uM	6 h	3	247	0.51	0.358892	1	1	1	1	0	Topoisomerase inhibitor	TOP2A|TOP2B	-0.4132	1.3725	-1.5979
CPC017_ASC_24H:BRD-K52721684-001-02-2:10	BRD-K52721684	PCO-400	ASC	trt_cp	10 uM	24 h	4	137	0.14	0.140041	1	0	1	1	0	Potassium channel activator	KCNJ8|ABCC9	-0.4132	1.3725	-1.5978
CPC018_A375_6H:BRD-K36055864-001-09-3:10	BRD-K36055864	cycloheximide	A375	trt_cp	10 uM	6 h	5	518	0.75	0.630269	0	0	1	1	0	Protein synthesis inhibitor	GSK3B|RPL3	-0.4131	1.3725	-1.5973
LJP005_PC3_24H:F13	BRD-K95435023	PHA-665752	PC3	trt_cp	10 uM	24 h	2	158	0.2905	0.216637	0	0	1	1	0	MET inhibitor	MET	-0.4131	1.3725	-1.5972
CPC018_SKB_24H:BRD-K61250553-003-16-5:10	BRD-K61250553	loperamide	SKB	trt_cp	10 uM	24 h	3	218	0.35	0.279314	0	0	1	1	0	Opioid receptor agonist	OPRM1|OPRD1|CYP2B6|CYP2C8|NPR2|CACNA1A|CALM1|OPRK1|POMC	-0.413	1.3725	-1.5971
LJP007_ASC_24H:B04	BRD-K21680192	mitoxantrone	ASC	trt_cp	10 uM	24 h	3	588	0.6965	0.647113	0	0	1	1	0	Topoisomerase inhibitor	TOP2A|PIM1	-0.413	1.3725	-1.5969
CPC006_NOMO1_6H:BRD-K23363278-001-01-3:1	BRD-K23363278	CYT-997	NOMO1	trt_cp	1.11 uM	6 h	2	398	0.32	0.360867	0	0	1	1	0	Tubulin inhibitor	TUBB	-0.413	1.3725	-1.5969
CPC001_HA1E_24H:BRD-K15086322-103-01-0:10	BRD-K15086322	JNJ-10191584	HA1E	trt_cp	10 uM	24 h	3	165	0.21	0.188227	1	0	1	1	0	Histamine receptor antagonist	HRH4	-0.413	1.3725	-1.5968
CPC018_A549_6H:BRD-K08998509-001-01-6:10	BRD-K08998509	fananserin	A549	trt_cp	10 uM	6 h	3	283	0.32	0.304298	0	0	1	1	0	Dopamine receptor antagonist|Serotonin receptor antagonist	HTR2A|DRD4	-0.4128	1.3724	-1.5963
CPC002_PC3_6H:BRD-A85424553-050-03-9:10	BRD-A85424553	thioperamide	PC3	trt_cp	10 uM	6 h	5	227	0.05	0.107728	0	0	1	1	0	Histamine receptor antagonist	HRH3|HRH4	-0.4127	1.368	-1.5957
CPC006_NOMO1_6H:BRD-K50590187-001-10-8:160	BRD-K50590187	capsaicin	NOMO1	trt_cp	150 uM	6 h	2	160	0.1	0.127906	0	0	1	1	0	TRPV agonist	TRPV1|ENOX2|CFTR	-0.4126	1.3584	-1.5953
CPC003_HCC515_24H:BRD-K67680372-003-01-8:10	BRD-K67680372	CI-966	HCC515	trt_cp	10 uM	24 h	3	61	0.21	0.114447	1	0	1	1	0	GAT inhibitor	SLC6A1	-0.4125	1.3502	-1.595
CPC017_ASC_24H:BRD-A94756469-001-03-9:10	BRD-A94756469	digoxin	ASC	trt_cp	10 uM	24 h	4	568	0.74	0.655572	1	1	1	1	0	Na/K-ATPase inhibitor	ATP1A1|ABCB1|RORC|SLCO1B3	-0.4123	1.3397	-1.5944
REP.B025_HT29_24H:P01	BRD-K79131256	albendazole	HT29	trt_cp	2.22 uM	24 h	2	442	0.6802	0.554447	1	1	1	1	0	Tubulin inhibitor	CYP1A2|CYP2J2|TUBA1A|TUBB|TUBB4B	-0.4123	1.3354	-1.5941
CPC014_SKB_24H:BRD-K19220233-001-01-5:10	BRD-K19220233	JNK-9L	SKB	trt_cp	10 uM	24 h	4	530	0.65	0.593506	0	0	1	1	0	JNK inhibitor	MAPK8	-0.4121	1.3257	-1.5935
REP.B024_MDAMB231_24H:F01	BRD-K74765201	tomelukast	MDAMB231	trt_cp	0.22 uM	24 h	2	218	0.4233	0.307173	0	0	1	1	0	Leukotriene receptor antagonist	CYSLTR1	-0.412	1.3224	-1.5932
CPC015_ASC_24H:BRD-A42167015-003-03-7:10	BRD-A42167015	carteolol	ASC	trt_cp	10 uM	24 h	4	332	0.41	0.373071	0	0	1	1	0	Adrenergic receptor antagonist	ADRB1|ADRB2	-0.412	1.3212	-1.593
CPC016_SKB_24H:BRD-K87991767-001-02-0:10	BRD-K87991767	umbelliferone	SKB	trt_cp	10 uM	24 h	3	72	0.14	0.101522	1	0	1	1	0	Cyclooxygenase inhibitor	CA9	-0.4119	1.3211	-1.5928
NMH001_NEU_24H:BRD-K67013324-001-02-3:10	BRD-K67013324	luzindole	NEU	trt_cp	10 uM	24 h	3	498	0.29	0.384277	0	0	1	1	0	Melatonin receptor antagonist	MTNR1B|MTNR1A	-0.4119	1.3211	-1.5928
CPC017_PHH_24H:BRD-K76674262-001-01-7:10	BRD-K76674262	BRD-K76674262	PHH	trt_cp	10 uM	24 h	3	323	0.49	0.402281	0	0	1	1	0	Protein synthesis inhibitor	RPL3	-0.4119	1.3211	-1.5926
AICHI002_HBL1_24H:C01	BRD-K15592317	CP-466722	HBL1	trt_cp	10 uM	24 h	3	204	0.42	0.295985	1	1	1	1	0	ATM kinase inhibitor	ATM	-0.4116	1.3211	-1.5917
REP.A028_HELA_24H:P13	BRD-K97472745	gestrinone	HELA	trt_cp	10 uM	24 h	3	505	0.702	0.602067	1	1	1	1	0	Progesterone receptor antagonist	PGR|AR|ESR1	-0.4115	1.3211	-1.5912
CPC018_SKB_24H:BRD-K14767410-001-01-5:10	BRD-K14767410	SC-560	SKB	trt_cp	10 uM	24 h	3	92	0.19	0.133691	1	0	1	1	0	Cyclooxygenase inhibitor	PTGS1	-0.4115	1.3211	-1.591
CPC002_HA1E_6H:BRD-A17453586-003-01-5:10	BRD-A17453586	MDL-72832	HA1E	trt_cp	10 uM	6 h	3	66	0.2	0.116176	1	0	1	1	0	Serotonin receptor agonist	HTR1A	-0.4115	1.3211	-1.591
CPC011_A375_6H:BRD-K79511609-001-17-6:10	BRD-K79511609	BRD-K79511609	A375	trt_cp	10 uM	6 h	3	52	0.28	0.122014	1	0	1	1	0	Adenosine receptor agonist	ADORA1|ADORA2A|ADORA2B	-0.4113	1.3211	-1.5903
CPC004_PC3_24H:BRD-K60274257-001-01-1:10	BRD-K60274257	dephostatin	PC3	trt_cp	10 uM	24 h	3	301	0.17	0.228738	0	0	1	1	0	Tyrosine phosphatase inhibitor	PTPN1|PTPN6	-0.4113	1.3211	-1.5903
CPC016_NEU_24H:BRD-K95763993-001-03-7:10	BRD-K95763993	trapidil	NEU	trt_cp	10 uM	24 h	3	91	0.07	0.080705	0	0	1	1	0	PDGFR inhibitor	PDGFRA	-0.4112	1.3211	-1.5899
CPC015_ASC_24H:BRD-K70505054-001-02-9:10	BRD-K70505054	ranitidine	ASC	trt_cp	10 uM	24 h	4	170	0.17	0.171901	0	0	1	1	0	Histamine receptor antagonist	HRH2|SLC22A2	-0.4112	1.3211	-1.5898
REP.A012_PC3_24H:B21	BRD-A00376169	KBG	PC3	trt_cp	1.11 uM	24 h	3	318	0.4804	0.395226	0	0	1	1	0	Neprilysin inhibitor	MME	-0.411	1.3211	-1.5893
REP.B024_YAPC_24H:E15	BRD-K75037734	carbachol	YAPC	trt_cp	0.25 uM	24 h	2	85	0.2382	0.143883	0	0	1	1	0	Cholinergic receptor agonist	CHRM1|CHRM2|CHRNA2|CHRM3|CHRM4|CHRM5	-0.411	1.3211	-1.5892
CPC015_ASC_24H:BRD-K81839095-001-04-6:10	BRD-K81839095	estrone	ASC	trt_cp	10 uM	24 h	4	249	0.02	0.0713584	0	0	1	1	0	Estrogen receptor agonist	ESR1|ESR2	-0.411	1.3211	-1.589
ISO002_HCT116.TP53.HR_24H:E20	BRD-K35781423	SANT-2	HCT116	trt_cp	3.33 uM	24 h	3	165	0.4832	0.28552	1	1	1	1	0	Smoothened receptor antagonist	SMO|DHH|IHH|PTCH1|SHH	-0.4109	1.3211	-1.5889
MOAR007_PC3_24H:C07	BRD-K50422030	clomethiazole	PC3	trt_cp	10 uM	24 h	3	82	0.14	0.108343	1	0	1	1	0	GABA receptor antagonist|GABA receptor modulator	GABRA1	-0.4109	1.3211	-1.5887
CPC014_MCF7_6H:L06	BRD-K01493881	apigenin	MCF7	trt_cp	10 uM	6 h	5	213	0.3237	0.265517	1	1	1	1	0	Casein kinase inhibitor|Cell proliferation inhibitor|Cytochrome P450 inhibitor	CYP1A2|MAOA|ODC1|XDH|AKR1B1|AR|CDK6|CFTR|CYP19A1|CYP1B1|HSD17B1	-0.4106	1.3211	-1.5878
AICHI001_K562_24H:M07	BRD-K50140147	NVP-TAE684	K562	trt_cp	10 uM	24 h	3	276	0.44	0.35238	1	1	1	1	0	ALK inhibitor	ALK|INSR	-0.4106	1.3211	-1.5876
CPC016_HEPG2_6H:BRD-K76810206-001-06-5:10	BRD-K76810206	nicergoline	HEPG2	trt_cp	10 uM	6 h	3	108	0.19	0.14485	1	0	1	1	0	Adrenergic receptor antagonist	ADRA1A	-0.4106	1.3211	-1.5876
REP.A020_YAPC_24H:D19	BRD-K84996356	AZD-3514	YAPC	trt_cp	10 uM	24 h	3	327	0.5037	0.410384	1	1	1	1	0	Drugs Acting on Androgen Receptor	AR	-0.4105	1.3211	-1.5871
REP.B028_MCF7_24H:F01	BRD-A93424738	dexamethasone-acetate	MCF7	trt_cp	2.22 uM	24 h	2	182	0.355	0.257028	1	1	1	1	0	Glucocorticoid receptor agonist|Corticosteroid agonist|Cytochrome P450 inhibitor	NR3C1	-0.4104	1.3211	-1.587
CPC017_A375_6H:BRD-A94624445-236-02-2:10	BRD-A94624445	bucladesine	A375	trt_cp	10 uM	6 h	3	69	0.03	0.0460061	0	0	1	1	0	Adenosine receptor agonist|CAMP stimulant	PRKACA	-0.4104	1.3211	-1.5868
CPC010_A549_6H:BRD-K92000912-001-08-4:10	BRD-K92000912	AM-251	A549	trt_cp	10 uM	6 h	2	99	0.18	0.134985	1	1	1	1	0	Cannabinoid receptor antagonist	CNR1|GPR18|GPR55	-0.4103	1.321	-1.5864
PAC004_U2OS_6H:BRD-K04976539-001-01-0:10	BRD-K04976539	aminogenistein	U2OS	trt_cp	10 uM	6 h	2	55	0.33	0.136229	1	1	1	1	0	Src inhibitor	LCK	-0.4103	1.321	-1.5863
CPC006_U937_6H:BRD-K12994359-001-07-7:177.6	BRD-K12994359	valdecoxib	U937	trt_cp	200 uM	6 h	2	108	0.4	0.210171	1	1	1	1	0	Cyclooxygenase inhibitor	PTGS2|CYP2C19|CA12	-0.4101	1.321	-1.5858
NMH002_NEU_6H:BRD-A16694057-001-05-0:10	BRD-A16694057	BADGE	NEU	trt_cp	10 uM	6 h	3	86	0.08	0.0838735	0	0	1	1	0	PPAR receptor antagonist	PPARG	-0.4101	1.321	-1.5855
REP.B015_MCF7_24H:L08	BRD-K59331299	voglibose	MCF7	trt_cp	0.74 uM	24 h	2	74	0.2461	0.136459	1	0	1	1	0	Glucosidase inhibitor	GAA|MGAM	-0.4099	1.3208	-1.585
MUC.CP008_P1A82_24H:N14	BRD-K12502280	TG-101348	P1A82	trt_cp	3.33 uM	24 h	3	406	0.72	0.546714	1	1	1	1	0	JAK inhibitor|FLT3 inhibitor	JAK2|FLT3|RET|BRD4|JAK1|JAK3|TYK2	-0.4098	1.3201	-1.5845
REP.A018_MCF10A_24H:P24	BRD-A67516570	lafutidine	MCF10A	trt_cp	0.04 uM	24 h	2	133	0.2375	0.179717	0	0	1	1	0	Histamine receptor antagonist	HRH2	-0.4098	1.3198	-1.5844
EMU001_K562_24H:C24	BRD-K21680192	mitoxantrone	K562	trt_cp	0.01 uM	24 h	3	113	0.3015	0.186644	1	1	1	1	0	Topoisomerase inhibitor	TOP2A|PIM1	-0.4097	1.3191	-1.5841
REP.B016_MCF10A_24H:F24	BRD-K52818472	ivacaftor	MCF10A	trt_cp	0.01 uM	24 h	2	70	0.0699	0.0707324	1	1	1	1	0	CFTR channel antagonist	CFTR|CYP3A5|CYP3A7	-0.4096	1.3189	-1.5839
LKCP002_A549_24H:K05	BRD-K24576554	AT-9283	A549	trt_cp	1.11 uM	24 h	5	320	0.4887	0.399877	1	1	1	1	0	Aurora kinase inhibitor|Abl inhibitor|Bcr-Abl inhibitor|FLT3 inhibitor|JAK inhibitor|Protein kinase inhibitor|Tubulin inhibitor	JAK2|AURKA|AURKB|JAK3|ABL1|BCR|FLT3|RPS6KA6|STK17A	-0.4096	1.3182	-1.5838
CPC004_HEPG2_6H:BRD-A55416093-001-03-1:10	BRD-A55416093	colforsin	HEPG2	trt_cp	10 uM	6 h	3	183	0.26	0.220568	0	0	1	1	0	Adenylyl cyclase activator	ADCY2|ADCY5	-0.4096	1.3186	-1.5838
CPC016_ASC_24H:BRD-K88741031-001-01-0:10	BRD-K88741031	BRD-K88741031	ASC	trt_cp	10 uM	24 h	3	154	0.24	0.1944	0	0	1	1	0	Tyrosine kinase inhibitor|EGFR inhibitor	EGFR	-0.4096	1.317	-1.5836
CPC007_HA1E_6H:BRD-K71534238-001-06-8:10	BRD-K71534238	GW-9508	HA1E	trt_cp	10 uM	6 h	3	80	0.12	0.0990755	1	0	1	1	0	Fatty acid receptor agonist|Free fatty acid receptor agonist|G protein-coupled receptor agonist	FFAR1|FFAR4	-0.4095	1.3139	-1.5832
CPC016_MCF7_24H:BRD-A85587465-001-02-5:10	BRD-A85587465	bemesetron	MCF7	trt_cp	10 uM	24 h	4	160	0.2	0.180886	1	0	1	1	0	Serotonin receptor antagonist	HTR3A|HTR3B	-0.4092	1.3053	-1.5823
CPC014_ASC_24H:BRD-U33728988-000-01-6:10	BRD-U33728988	QL-X-138	ASC	trt_cp	10 uM	24 h	3	350	0.58	0.455595	0	0	1	1	0	MTOR inhibitor	BTK|JAK3|MKNK2|MTOR|PRKDC	-0.4092	1.3049	-1.5822
CPC015_ASC_24H:BRD-A15415227-003-01-1:10	BRD-A15415227	GW-1929	ASC	trt_cp	10 uM	24 h	4	521	0.13	0.263161	0	0	1	1	0	PPAR receptor agonist|Insulin sensitizer	PPARG|INS	-0.4092	1.3028	-1.582
PAC002_U2OS_6H:BRD-K46211610-003-05-1:10.169	BRD-K46211610	tolazoline	U2OS	trt_cp	10 uM	6 h	2	31	0.21	0.081587	0	0	1	1	0	Adrenergic receptor antagonist	ADRA2A|ADRA2B|ADRA2C|ADRA1A|HRH1|HRH2	-0.4091	1.2996	-1.5817
CPC013_SKB_24H:BRD-K29905972-001-03-0:10	BRD-K29905972	axitinib	SKB	trt_cp	10 uM	24 h	3	132	0.24	0.17998	0	0	1	1	0	VEGFR inhibitor|PDGFR inhibitor	KDR|FLT1|FLT4|CYP2C19|CYP3A5|KIT|PDGFRB|CSF1|PLK4	-0.4089	1.2956	-1.5811
CPC017_SKB_24H:BRD-K96778649-001-03-2:10	BRD-K96778649	tyrphostin-47	SKB	trt_cp	10 uM	24 h	2	37	0.04	0.0389011	1	0	1	1	0	EGFR inhibitor	EGFR	-0.4089	1.2949	-1.581
CPC006_NCIH596_6H:BRD-A34255068-001-16-2:10	BRD-A34255068	rolipram	NCIH596	trt_cp	10 uM	6 h	2	80	0.14	0.107014	1	0	1	1	0	Phosphodiesterase inhibitor	PDE4A|PDE4B|PDE4D|PDE4C	-0.4088	1.2925	-1.5806
CPC006_SW480_6H:BRD-K50590187-001-10-8:160	BRD-K50590187	capsaicin	SW480	trt_cp	150 uM	6 h	2	131	0.07	0.0968312	0	0	1	1	0	TRPV agonist	TRPV1|ENOX2|CFTR	-0.4084	1.2835	-1.5791
PAC002_U2OS_6H:BRD-K49481516-004-03-5:10	BRD-K49481516	galantamine	U2OS	trt_cp	10 uM	6 h	2	185	0.48	0.301326	0	0	1	1	0	Acetylcholinesterase inhibitor	ACHE|BCHE|CHRNA1|CHRNA10|CHRNA2|CHRNA3|CHRNA4|CHRNA5|CHRNA6|CHRNA7|CHRNA9|CHRNB1|CHRNB2|CHRNB3|CHRNB4|CHRND|CHRNE|CHRNG	-0.4084	1.2837	-1.5791
CPC020_VCAP_24H:BRD-K13356952-001-21-0:10	BRD-K13356952	methazolamide	VCAP	trt_cp	10 uM	24 h	5	120	0.17	0.144426	1	0	1	1	0	Carbonic anhydrase inhibitor	CA1|CA2|CA4|CA7|INS|CA12|CA14	-0.4083	1.2816	-1.5788
LJP001_HS578T_6H:BRD-K68191783-001-02-0:10	BRD-K68191783	ALW-II-38-3	HS578T	trt_cp	10 uM	6 h	3	275	0.39	0.331153	0	0	1	1	0	Ephrin inhibitor	DDR1	-0.4083	1.2814	-1.5787
CPC013_ASC_24H:BRD-K29905972-001-03-0:10	BRD-K29905972	axitinib	ASC	trt_cp	10 uM	24 h	4	144	0.19	0.167259	0	0	1	1	0	VEGFR inhibitor|PDGFR inhibitor	KDR|FLT1|FLT4|CYP2C19|CYP3A5|KIT|PDGFRB|CSF1|PLK4	-0.4082	1.28	-1.5785
CPC015_PHH_24H:BRD-K18194590-065-05-6:10	BRD-K18194590	mephentermine	PHH	trt_cp	10 uM	24 h	2	103	0.32	0.183579	0	0	1	1	0	Adrenergic receptor agonist	ADRA1A|ADRA1B|ADRA1D|ADRA2A|ADRA2B|ADRA2C|ADRB1|ADRB2|ADRB3	-0.4082	1.2801	-1.5785
CVD001_HEPG2_6H:BRD-K43405658-001-01-8:10	BRD-K43405658	BRD-K43405658	HEPG2	trt_cp	10 uM	6 h	3	80	0.24	0.140114	1	1	1	1	0	Protein tyrosine kinase inhibitor	EGFR	-0.408	1.2739	-1.5775
CPC016_ASC_24H:BRD-K54210043-001-02-0:10	BRD-K54210043	NS-1619	ASC	trt_cp	10 uM	24 h	3	87	0.12	0.103319	1	0	1	1	0	Calcium channel activator	KCNMA1	-0.408	1.2742	-1.5775
CPC014_A375_6H:N07	BRD-K32710582	EI-247	A375	trt_cp	10 uM	6 h	2	67	0.208	0.119371	1	1	1	1	0	IGF-1 inhibitor	INSR	-0.4079	1.2733	-1.5774
CPC016_SKB_24H:BRD-K54210043-001-02-0:10	BRD-K54210043	NS-1619	SKB	trt_cp	10 uM	24 h	3	124	0.06	0.0872202	1	0	1	1	0	Calcium channel activator	KCNMA1	-0.408	1.2735	-1.5774
CPC016_ASC_24H:BRD-K06543683-066-01-3:10	BRD-K06543683	bisindolylmaleimide-ix	ASC	trt_cp	10 uM	24 h	2	510	0.65	0.5822	0	0	1	1	0	PKC inhibitor	SIRT1|LRRK2|SIRT2|AKT1|GSK3B|LCK|MAPK1|MAPK11|MAPK12|MAPK14|MAPK8|PRKCA|ROCK1|RPS6KB1	-0.408	1.2735	-1.5774
REP.A023_MCF10A_24H:B07	BRD-K67901620	avasimibe	MCF10A	trt_cp	10 uM	24 h	3	184	0.4733	0.298406	1	1	1	1	0	ACAT inhibitor	ABCB1|SOAT1|CES1	-0.408	1.2736	-1.5774
PAC004_U2OS_6H:BRD-K15766189-001-02-3:10	BRD-K15766189	cefdinir	U2OS	trt_cp	10 uM	6 h	2	59	0.14	0.0919011	0	0	1	1	0	Bacterial cell wall synthesis inhibitor	MPO	-0.4079	1.2731	-1.5773
CPC018_ASC_24H:BRD-K92778217-001-17-8:10	BRD-K92778217	mefenamic-acid	ASC	trt_cp	10 uM	24 h	3	119	0.02	0.0493309	0	0	1	1	0	Cyclooxygenase inhibitor	PTGS2|PTGS1|KCNQ1|TRPM3	-0.4079	1.2716	-1.5771
CPD001_MCF7_24H:BRD-K56699285-001-16-9:10	BRD-K56699285	metergoline	MCF7	trt_cp	10 uM	24 h	3	256	0.33	0.293905	0	0	1	1	0	Dopamine receptor agonist|Serotonin receptor antagonist	HTR2A|DRD2|HTR1A|HTR1B|HTR1D|HTR1E|HTR1F|HTR2B|HTR2C|HTR5A|HTR6|HTR7	-0.4077	1.2675	-1.5765
CPC003_HA1E_6H:BRD-K31633810-003-01-0:10	BRD-K31633810	DAU-5884	HA1E	trt_cp	10 uM	6 h	2	52	0.1	0.0729176	1	1	1	1	0	Acetylcholine receptor antagonist	CHRM3|CHRM1	-0.4077	1.2671	-1.5764
REP.B022_YAPC_24H:M14	BRD-K72414522	AZD-5438	YAPC	trt_cp	0.74 uM	24 h	2	334	0.5455	0.43162	1	1	1	1	0	CDK inhibitor	CCNB1|CCNE1|CDK1|CDK2|KCNH2	-0.4077	1.2671	-1.5764
REP.A020_HA1E_24H:G01	BRD-A87130939	masoprocol	HA1E	trt_cp	10 uM	24 h	3	376	0.4745	0.427113	0	0	1	1	0	Lipoxygenase inhibitor	ALOX5|IGF1R	-0.4077	1.2671	-1.5764
CPC006_SW480_6H:BRD-K08417745-001-02-9:88.8	BRD-K08417745	SID-26681509	SW480	trt_cp	90 uM	6 h	2	79	0.06	0.0696177	0	0	1	1	0	Cathepsin inhibitor	CTSL	-0.4077	1.2663	-1.5763
REP.A017_MCF7_24H:N07	BRD-K67783091	haloperidol	MCF7	trt_cp	10 uM	24 h	3	161	0.2373	0.197648	1	1	1	1	0	Dopamine receptor antagonist	DRD2|DRD3|HTR2A|DRD1|DRD4|CYP3A7|DRD5|GRIN2B|HRH1|HTR1A|HTR1D|HTR2B|HTR7|KCNH1	-0.4077	1.2667	-1.5763
CPC004_HCC515_6H:BRD-A29426959-050-07-4:10	BRD-A29426959	carbinoxamine	HCC515	trt_cp	10 uM	6 h	3	48	0.32	0.125322	1	1	1	1	0	Histamine receptor antagonist|Calcium channel blocker	HRH1	-0.4076	1.2654	-1.5761
REP.A002_MCF7_24H:C13	BRD-K16133773	BRD-K16133773	MCF7	trt_cp	10 uM	24 h	3	115	0.0835	0.0990884	0	0	1	1	0	17,20 lyase inhibitor|Cytochrome P450 inhibitor|Steroid sulfatase inhibitor|Androgen biosynthesis inhibitor	CYP17A1|CYP2C19|CYP2C8|CYP3A5	-0.4076	1.2654	-1.5761
CPC002_HA1E_24H:BRD-K37312348-001-06-9:10	BRD-K37312348	kenpaullone	HA1E	trt_cp	10 uM	24 h	3	368	0.58	0.467163	1	1	1	1	0	CDK inhibitor|GSK inhibitor	GSK3B|CDK1|CDK5|CDK2|LCK|CCNB1	-0.4076	1.2649	-1.576
REP.A007_HA1E_24H:H01	BRD-K51333959	siramesine	HA1E	trt_cp	10 uM	24 h	3	269	0.4607	0.355972	1	1	1	1	0	Sigma receptor antagonist	PGRMC1|SIGMAR1|ADRA1A|ADRA1B|ADRA1D	-0.4074	1.2606	-1.5754
REP.B016_HELA_24H:F17	BRD-K52662033	lidocaine	HELA	trt_cp	0.03 uM	24 h	2	741	0.2358	0.42268	0	0	1	1	0	Histamine receptor agonist	SCN5A|SCN10A|SCN9A|EGFR|SCN11A|SCN1A|SCN2A|SCN3A|SCN4A|SCN7A|SCN8A	-0.4071	1.252	-1.5742
CPC006_NCIH596_6H:BRD-K11853856-003-01-3:10	BRD-K11853856	PJ-34	NCIH596	trt_cp	10 uM	6 h	2	120	0.26	0.178611	0	0	1	1	0	PARP inhibitor	EEF2|PARP1|PARP15|PARP3	-0.4071	1.2502	-1.574
REP.A026_A549_24H:M02	BRD-K98769987	flumazenil	A549	trt_cp	3.33 uM	24 h	2	106	0.1308	0.119066	0	0	1	1	0	Benzodiazepine receptor antagonist	GABRA1|GABRA2|GABRA3|GABRA5|GABRA4|GABRA6|GABRB1|GABRB2|GABRB3|GABRD|GABRE|GABRG1|GABRG2|GABRG3|GABRP|GABRQ	-0.407	1.2493	-1.5738
CPC016_NEU_24H:BRD-K92760278-001-02-4:10	BRD-K92760278	riboflavin	NEU	trt_cp	10 uM	24 h	3	152	0.23	0.189067	0	0	1	1	0	Vitamin B	BLVRB|RFK	-0.4069	1.2464	-1.5734
REP.A016_HELA_24H:L01	BRD-K54847683	equol	HELA	trt_cp	10 uM	24 h	3	403	0.5816	0.489548	1	1	1	1	0	Estrogen receptor agonist	ESR2|ESR1	-0.4068	1.2431	-1.573
CPC017_HEPG2_6H:BRD-A68281735-001-02-0:10	BRD-A68281735	REV-5901	HEPG2	trt_cp	10 uM	6 h	3	197	0.29	0.241692	1	1	1	1	0	Leukotriene receptor antagonist|Lipoxygenase inhibitor	ALOX5	-0.4068	1.2422	-1.5728
AICHI002_THP1_24H:N09	BRD-K72414522	AZD-5438	THP1	trt_cp	0.66 uM	24 h	3	464	0.5831	0.52597	1	1	1	1	0	CDK inhibitor	CCNB1|CCNE1|CDK1|CDK2|KCNH2	-0.4066	1.2393	-1.5722
REP.B024_HA1E_24H:F01	BRD-K74765201	tomelukast	HA1E	trt_cp	0.22 uM	24 h	2	68	0.2255	0.125216	1	1	1	1	0	Leukotriene receptor antagonist	CYSLTR1	-0.4066	1.2393	-1.5721
CVD001_HUH7_6H:BRD-K55468218-001-16-2:10	BRD-K55468218	spiperone	HUH7	trt_cp	10 uM	6 h	3	390	0.64	0.505188	0	0	1	1	0	Dopamine receptor antagonist	DRD2|ADRA1A|DRD3|DRD4|HTR1A|HTR2A|HTR7|ADRA1B|ADRA1D|DRD1|DRD5|HTR1D|HTR2B|HTR2C|HTR6	-0.4065	1.2393	-1.572
REP.A016_MCF7_24H:G01	BRD-K53061490	ozagrel	MCF7	trt_cp	10 uM	24 h	3	90	0.2473	0.150856	1	0	1	1	0	Thromboxane synthase inhibitor	TBXAS1	-0.4065	1.2393	-1.5719
REP.A020_HA1E_24H:L01	BRD-A45889380	mepacrine	HA1E	trt_cp	10 uM	24 h	3	558	0.7321	0.646298	0	0	1	1	0	NFKB inhibitor|Cytokine production inhibitor|p53 activator	TP53|AKT1|MTOR|NFKB1|PLA2G2A|PLA2G2D|PLA2G1B|PLA2G4A|PLA2G6|PLCL1	-0.4065	1.2393	-1.5717
REP.B012_HELA_24H:H23	BRD-K01815685	BRD-K01815685	HELA	trt_cp	0.03 uM	24 h	2	224	0.4536	0.322323	0	0	1	1	0	Aryl hydrocarbon receptor agonist|Indoleamine 2,3-dioxygenase inhibitor	AHR|IDO1	-0.4064	1.2393	-1.5714
REP.B006_HELA_24H:H04	BRD-K20738689	dazmegrel	HELA	trt_cp	0.08 uM	24 h	2	45	0.0167	0.0277201	0	0	1	1	0	Thromboxane synthase inhibitor	TBXAS1	-0.4064	1.2393	-1.5713
CPC017_SKB_24H:BRD-K28806945-001-01-9:10	BRD-K28806945	L-750667	SKB	trt_cp	10 uM	24 h	2	335	0.64	0.468212	0	0	1	1	0	Dopamine receptor antagonist	DRD4	-0.4063	1.2393	-1.571
REP.A007_HA1E_24H:I01	BRD-K52172416	anastrozole	HA1E	trt_cp	10 uM	24 h	3	114	0.2311	0.164128	1	1	1	1	0	Aromatase inhibitor	CYP19A1	-0.4063	1.2393	-1.5709
LUNG001_A549_24H:BRD-K01493881:10	BRD-K01493881	apigenin	A549	trt_cp	10 uM	24 h	2	172	0.2068	0.190709	1	1	1	1	0	Casein kinase inhibitor|Cell proliferation inhibitor|Cytochrome P450 inhibitor	CYP1A2|MAOA|ODC1|XDH|AKR1B1|AR|CDK6|CFTR|CYP19A1|CYP1B1|HSD17B1	-0.4062	1.2393	-1.5705
REP.A001_HA1E_24H:B13	BRD-A25234499	aminoglutethimide	HA1E	trt_cp	10 uM	24 h	3	142	0.3569	0.22764	1	1	1	1	0	Glucocorticoid receptor antagonist	CYP19A1|CYP11A1|NR3C1	-0.4061	1.2393	-1.5704
CPC005_HA1E_6H:BRD-A72988804-001-03-8:10	BRD-A72988804	tiaprofenic-acid	HA1E	trt_cp	10 uM	6 h	2	82	0.16	0.115824	1	0	1	1	0	Cyclooxygenase inhibitor	PTGS2|PTGS1	-0.4059	1.2393	-1.5695
PAC004_U2OS_6H:BRD-K15601958-001-01-3:10	BRD-K15601958	SEW-2871	U2OS	trt_cp	10 uM	6 h	2	25	0.12	0.0553849	1	0	1	1	0	Lysophospholipid receptor agonist	S1PR1	-0.4059	1.2393	-1.5693
PBIOA014_HA1E_24H:A19	BRD-K64451768	GANT-58	HA1E	trt_cp	10 uM	24 h	3	159	0.31	0.224497	1	1	1	1	0	GLI antagonist	DHH|IHH|GLI1	-0.4057	1.2393	-1.5688
CPC002_HCC515_6H:BRD-K93201660-001-03-2:10	BRD-K93201660	ML-7	HCC515	trt_cp	10 uM	6 h	2	60	0.2	0.11077	1	1	1	1	0	Muscle relaxant	MYLK	-0.4056	1.2393	-1.5683
CPC001_PC3_24H:E18	BRD-K72024482	MRS-1754	PC3	trt_cp	10 uM	24 h	5	99	0.1215	0.110901	1	0	1	1	0	Adenosine receptor antagonist	ADORA2B	-0.4055	1.2393	-1.5679
CPC014_A375_6H:G15	BRD-U33728988	QL-X-138	A375	trt_cp	10 uM	6 h	2	289	0.6274	0.430578	1	1	1	1	0	MTOR inhibitor	BTK|JAK3|MKNK2|MTOR|PRKDC	-0.4054	1.2393	-1.5676
CPC017_A549_6H:BRD-K29555132-001-02-2:10	BRD-K29555132	arachidonamide	A549	trt_cp	10 uM	6 h	3	56	0.06	0.0586138	1	0	1	1	0	Cannabinoid receptor agonist	CNR1|CNR2	-0.4054	1.2393	-1.5674
CPC016_A549_24H:BRD-K31054881-300-01-3:10	BRD-K31054881	BMY-7378	A549	trt_cp	10 uM	24 h	2	99	0.25	0.159081	0	0	1	1	0	Adrenergic receptor antagonist|Serotonin receptor antagonist	HTR1A|ADRA1D|ADRA1A|ADRA1B	-0.4053	1.2393	-1.5671
CPC016_ASC_24H:BRD-K36737713-001-01-6:10	BRD-K36737713	AG-957	ASC	trt_cp	10 uM	24 h	3	279	0.42	0.346144	0	0	1	1	0	Protein tyrosine kinase inhibitor	ABL1|EGFR	-0.4052	1.2393	-1.5666
CPC016_A375_6H:BRD-K46441700-300-01-4:10	BRD-K46441700	GR-55562	A375	trt_cp	10 uM	6 h	5	193	0.27	0.230829	0	0	1	1	0	Serotonin receptor antagonist	HTR1B	-0.4051	1.2393	-1.5665
CPC018_SKB_24H:BRD-A20589515-001-01-1:10	BRD-A20589515	dihydroxyphenylglycine	SKB	trt_cp	10 uM	24 h	3	389	0.35	0.373112	0	0	1	1	0	Glutamate receptor agonist	GRM1|GRM5	-0.405	1.2393	-1.5661
CPC016_NPC_24H:BRD-K87991767-001-02-0:10	BRD-K87991767	umbelliferone	NPC	trt_cp	10 uM	24 h	4	110	0.14	0.125485	0	0	1	1	0	Cyclooxygenase inhibitor	CA9	-0.405	1.2393	-1.5661
REP.A023_JURKAT_24H:E01	BRD-K68867920	quetiapine	JURKAT	trt_cp	10 uM	24 h	3	174	0.1859	0.181863	0	0	1	1	0	Dopamine receptor antagonist|Serotonin receptor antagonist	DRD2|HTR1A|HTR2A|DRD1|HRH1|HTR1D|HTR1E|ADRA1A|ADRA1B|ADRA1D|ADRA2A|ADRA2B|ADRA2C|CHRM1|CHRM2|CHRM3|CHRM4|CHRM5|DRD3|DRD4|DRD5|HTR1B|HTR1F|HTR2C|HTR3A|HTR6|HTR7|SLC6A2	-0.4049	1.2393	-1.5655
LJP009_HELA_24H:J01	BRD-K67578145	GDC-0879	HELA	trt_cp	10 uM	24 h	3	146	0.2101	0.177101	1	0	1	1	0	RAF inhibitor	BRAF	-0.4048	1.2393	-1.5651
CPC018_PHH_24H:BRD-A03623303-045-05-3:10	BRD-A03623303	metoprolol	PHH	trt_cp	10 uM	24 h	3	100	0.12	0.11077	0	0	1	1	0	Adrenergic receptor antagonist	ADRB1|ADRB2	-0.4045	1.2393	-1.5639
REP.A013_HELA_24H:A22	BRD-K37561857	zardaverine	HELA	trt_cp	0.37 uM	24 h	3	528	0.7928	0.654228	0	0	1	1	0	Phosphodiesterase inhibitor	PDE4D|PDE3A|PDE4A|PDE4B|PDE4C	-0.4044	1.2393	-1.5637
CPC018_A549_6H:BRD-K12765235-304-03-8:10	BRD-K12765235	carbenoxolone	A549	trt_cp	10 uM	6 h	3	78	0.11	0.0936643	0	0	1	1	0	11-beta-HSD1 inhibitor	HSD11B1|GJA1|GJA10|GJA3|GJA4|GJA5|GJA8|GJA9|GJB1|GJB2|GJB3|GJB4|GJB5|GJB6|GJB7|GJC1|GJC2|GJC3|GJD2|GJD3|GJD4|GJE1|PANX1|PANX2|PANX3	-0.4043	1.2393	-1.5634
CPC017_ASC_24H:BRD-K94176593-001-02-9:10	BRD-K94176593	TWS-119	ASC	trt_cp	10 uM	24 h	4	374	0.58	0.470956	1	1	1	1	0	GSK inhibitor	GSK3B|JUN|MYC	-0.4043	1.2393	-1.5632
REP.A024_HELA_24H:L15	BRD-K78055238	LY-2090314	HELA	trt_cp	1.11 uM	24 h	3	396	0.6818	0.52542	1	1	1	1	0	GSK inhibitor	GSK3B	-0.4042	1.2393	-1.5627
REP.A013_YAPC_24H:A13	BRD-K37385792	conivaptan	YAPC	trt_cp	10 uM	24 h	3	250	0.5231	0.365673	1	1	1	1	0	Vasopressin receptor antagonist	AVPR1A|AVPR2|OXT|OXTR	-0.404	1.2393	-1.5623
PBIOA015_HCC515_24H:P19	BRD-K80431395	triciribine	HCC515	trt_cp	10 uM	24 h	3	203	0.3418	0.266357	1	1	1	1	0	AKT inhibitor	AKT1|AKT2|AKT3	-0.4037	1.2393	-1.5611
PAC003_U2OS_6H:BRD-K37798499-001-02-5:3.39814	BRD-K37798499	etoposide	U2OS	trt_cp	3.33 uM	6 h	2	111	0.41	0.215717	1	1	1	1	0	Topoisomerase inhibitor	TOP2A|TOP2B|CYP2E1|CYP3A5	-0.4037	1.2393	-1.5611
CPC014_HA1E_6H:BRD-K93331255-001-01-2:10	BRD-K93331255	lypressin	HA1E	trt_cp	10 uM	6 h	3	166	0.37	0.250603	1	1	1	1	0	Vasopressin receptor agonist	AVPR1A|AVPR1B|AVPR2	-0.4036	1.2389	-1.5605
LIVB002_HUH7_72H:E06	BRD-A08545410	doxycycline	HUH7	trt_cp	8 uM	72 h	3	117	0.17	0.142609	0	0	1	1	0	Bacterial 30S ribosomal subunit inhibitor	MMP8|MMP1	-0.4035	1.2382	-1.56
CVD001_HEPG2_6H:BRD-K03067624-001-01-5:10	BRD-K03067624	emetine	HEPG2	trt_cp	10 uM	6 h	3	469	0.73	0.591668	0	0	1	1	0	Protein synthesis inhibitor	RPS2	-0.4034	1.2375	-1.5598
CPC015_ASC_24H:BRD-K79366068-236-01-5:10	BRD-K79366068	PSB-069	ASC	trt_cp	10 uM	24 h	4	166	0.13	0.148544	0	0	1	1	0	NTPDase inhibitor	ENTPD1|ENTPD2|ENTPD3	-0.4034	1.2374	-1.5597
REP.A018_THP1_24H:A13	BRD-K62196610	AVN-944	THP1	trt_cp	10 uM	24 h	2	476	0.579	0.530852	0	0	1	1	0	Inosine monophosphate dehydrogenase inhibitor	IMPDH2|IMPDH1	-0.4033	1.237	-1.5596
REP.A028_HEK293_24H:L09	BRD-K63750851	BRD-K63750851	HEK293	trt_cp	1.11 uM	24 h	2	270	0.4104	0.336602	0	0	1	1	0	Dehydrogenase inhibitor|Inositol monophosphatase inhibitor	IMPDH1|IMPDH2	-0.4033	1.2369	-1.5595
REP.B026_HT29_24H:O17	BRD-A65051990	acenocoumarol	HT29	trt_cp	0.03 uM	24 h	2	63	0.1894	0.110456	1	0	1	1	0	Vitamin K antagonist	VKORC1	-0.4032	1.2167	-1.5589
LJP005_SKBR3_24H:P07	BRD-K87737963	CYT-387	SKBR3	trt_cp	10 uM	24 h	3	191	0.46	0.299727	1	1	1	1	0	JAK inhibitor	JAK1|JAK2|JAK3	-0.4031	1.2157	-1.5585
CPC006_NOMO1_6H:BRD-A26711594-003-06-4:10	BRD-A26711594	nicardipine	NOMO1	trt_cp	10 uM	6 h	2	77	0.08	0.0793635	1	0	1	1	0	Calcium channel blocker	CACNA1C|ADORA3|ADRA1A|ADRA1B|ADRA1D|CACNA1D|CACNA2D1|CACNB2|CALM1|CHRM1|CHRM2|CHRM3|CHRM4|CHRM5|PDE1A|PDE1B	-0.403	1.2157	-1.5584
CVD001_HUH7_6H:BRD-K22134346-001-11-6:10	BRD-K22134346	simvastatin	HUH7	trt_cp	10 uM	6 h	3	66	0.2	0.116176	0	0	1	1	0	HMGCR inhibitor	HMGCR|CYP2C8|CYP3A4|CYP3A5|ITGB2	-0.4028	1.2157	-1.5576
CPC017_HT29_6H:BRD-K07691486-001-04-9:10	BRD-K07691486	roscovitine	HT29	trt_cp	10 uM	6 h	5	331	0.48	0.403056	0	0	1	1	0	CDK inhibitor	CDK2|CDK9|CDK7|CDK1|CDK5	-0.4028	1.2157	-1.5574
REP.B027_HELA_24H:O12	BRD-A97808748	spironolactone	HELA	trt_cp	0.01 uM	24 h	2	108	0.3318	0.191417	1	1	1	1	0	Mineralocorticoid receptor antagonist	NR3C2|KCNA5|KCND3|SCNN1A|AR|CACNA1A|CACNA1B|CACNA1C|CACNA1D|CACNA1F|CACNA1G|CACNA1H|CACNA1I|CACNA1S|CACNA2D1|CACNA2D2|CACNA2D3|CACNB1|CACNB2|CACNB3|CACNB4|CACNG1|CYP11B2|NR3C1|PGR|SHBG	-0.4027	1.2157	-1.5572
CPC014_SKB_24H:BRD-K77390737-001-03-2:10	BRD-K77390737	xanthohumol	SKB	trt_cp	10 uM	24 h	4	215	0.55	0.347721	0	0	1	1	0	ATPase inhibitor	VCP	-0.4027	1.2157	-1.5571
REP.B007_YAPC_24H:I23	BRD-K52989797	clomipramine	YAPC	trt_cp	0.03 uM	24 h	2	109	0.1742	0.139337	1	0	1	1	0	Serotonin receptor antagonist	SLC6A4|SLC6A2|CYP2C19|GSTP1|HTR2A|HTR2B|HTR2C|SLC6A3	-0.4026	1.2157	-1.5568
CPC017_ASC_24H:BRD-A10355991-003-01-8:10	BRD-A10355991	norketamine	ASC	trt_cp	10 uM	24 h	4	67	0.3	0.14336	1	0	1	1	0	Glutamate receptor antagonist	CYP3A4	-0.4026	1.2157	-1.5568
CPC016_ASC_24H:BRD-K97509413-001-01-8:10	BRD-K97509413	coumestrol	ASC	trt_cp	10 uM	24 h	3	105	0.27	0.170258	0	0	1	1	0	Estrogen receptor agonist	ESR1|ESR2	-0.4026	1.2157	-1.5566
CPC017_A375_6H:BRD-K34533029-001-01-0:10	BRD-K34533029	BRD-K34533029	A375	trt_cp	10 uM	6 h	3	258	0.21	0.235369	0	0	1	1	0	EGFR inhibitor	EGFR	-0.4026	1.2157	-1.5566
CPC016_SKB_24H:BRD-K77677632-003-01-8:10	BRD-K77677632	SB-200646	SKB	trt_cp	10 uM	24 h	3	70	0.16	0.107014	1	0	1	1	0	Serotonin receptor antagonist	HTR2B|HTR2C	-0.4024	1.2157	-1.5558
CPC005_MCF7_6H:F15	BRD-K41564320	purvalanol-b	MCF7	trt_cp	10 uM	6 h	4	139	0.1208	0.13103	1	0	1	1	0	CDK inhibitor	CDK2|CDK4|MAPK1|MAPK3|CDK5|SRPK2	-0.4024	1.2157	-1.5558
CPC015_ASC_24H:BRD-K12539581-001-14-6:10	BRD-K12539581	nocodazole	ASC	trt_cp	10 uM	24 h	4	388	0.15	0.243945	0	0	1	1	0	Tubulin inhibitor	HPGDS	-0.4023	1.2157	-1.5556
LJP005_HCC515_24H:B14	BRD-K59369769	tozasertib	HCC515	trt_cp	3.33 uM	24 h	3	154	0.47	0.272044	1	1	1	1	0	Aurora kinase inhibitor|Bcr-Abl inhibitor|FLT3 inhibitor|JAK inhibitor	AURKA|AURKB|ABL1|AURKC|BCR|FLT3|JAK2|DDR2|LCK	-0.4023	1.2157	-1.5556
CPC018_PHH_24H:BRD-K37814297-050-05-4:10	BRD-K37814297	acepromazine	PHH	trt_cp	10 uM	24 h	3	51	0.2	0.102125	0	0	1	1	0	Dopamine receptor antagonist	ADRA1A|ADRA1B|DRD1|DRD2|HTR1A|HTR2A	-0.4023	1.2157	-1.5555
CPC010_A549_6H:BRD-K28143534-003-20-0:10	BRD-K28143534	cyproheptadine	A549	trt_cp	10 uM	6 h	2	110	0.24	0.164298	1	1	1	1	0	Histamine receptor antagonist	HRH1|HTR2B|ADRA1A|ADRA1B|ADRA1D|CHRM1|CHRM2|CHRM3|HTR2A|HTR2C|HTR6|HTR7	-0.4023	1.2157	-1.5554
REP.A020_HELA_24H:D05	BRD-K84466663	nelarabine	HELA	trt_cp	0.125 uM	24 h	2	104	0.2528	0.163959	0	0	1	1	0	DNA inhibitor|T cell inhibitor	ADA|POLA1	-0.4022	1.2157	-1.5551
CPD001_PC3_24H:BRD-K74913225-001-07-4:10	BRD-K74913225	brinzolamide	PC3	trt_cp	10 uM	24 h	3	105	0.11	0.108673	1	0	1	1	0	Carbonic anhydrase inhibitor	CA2|CA7|CA1|CYP2B6|CYP2C8|CA12|CA14|CA4|CA5A	-0.4021	1.2157	-1.555
CPC004_MCF7_6H:BRD-K42748308-300-01-2:10	BRD-K42748308	XE-991	MCF7	trt_cp	10 uM	6 h	4	109	0.15	0.129297	1	0	1	1	0	Potassium channel antagonist	KCNQ1|KCNQ2|KCNQ3|KCNQ4|KCNQ5	-0.4021	1.2157	-1.5548
LUNG001_A549_24H:BRD-K35687265:10	BRD-K35687265	ON-01910	A549	trt_cp	10 uM	24 h	2	269	0.6191	0.412655	1	1	1	1	0	PLK inhibitor	PLK1|CDK1|FLT1|FYN|PDGFRA|PLK2|SRC	-0.4021	1.2157	-1.5547
CPC003_PC3_6H:BRD-K25875056-001-01-2:10	BRD-K25875056	SC-9	PC3	trt_cp	10 uM	6 h	4	103	0.16	0.12981	1	0	1	1	0	Protein synthesis stimulant	PRKCA	-0.4021	1.2157	-1.5546
CPC009_HEPG2_6H:BRD-K22878149-337-02-4:10	BRD-K22878149	SB-205607	HEPG2	trt_cp	10 uM	6 h	3	144	0.18	0.162798	1	0	1	1	0	Delta 1 opioid receptor agonist	OPRD1	-0.402	1.2157	-1.5545
REP.A009_HUVEC.A_24H:F01	BRD-A29520968	acifran	HUVEC	trt_cp	10 uM	24 h	3	152	0.418	0.254883	1	1	1	1	0	Cholesterol inhibitor	HCAR2|HCAR3	-0.402	1.2157	-1.5545
CPC016_A549_24H:BRD-K36737713-001-01-6:10	BRD-K36737713	AG-957	A549	trt_cp	10 uM	24 h	3	153	0.21	0.181253	0	0	1	1	0	Protein tyrosine kinase inhibitor	ABL1|EGFR	-0.402	1.2156	-1.5542
CPC005_A549_24H:BRD-K69023402-001-02-5:10	BRD-K69023402	thapsigargin	A549	trt_cp	10 uM	24 h	3	465	0.74	0.593161	1	1	1	1	0	ATPase inhibitor	ATP2A1	-0.4019	1.2147	-1.5538
ASG003_A549_24H:H16	BRD-K09951645	dabrafenib	A549	trt_cp	10 uM	24 h	5	141	0.343	0.222376	1	1	1	1	0	RAF inhibitor	BRAF|CYP2B6|CYP2C19|CYP2C8|CYP3A4|LIMK1|NEK11|RAF1|SIK1	-0.4018	1.2135	-1.5535
CPC016_A549_24H:BRD-K37618799-001-01-4:10	BRD-K37618799	MRS-1220	A549	trt_cp	10 uM	24 h	2	77	0.07	0.0742378	0	0	1	1	0	Adenosine receptor antagonist	ADORA3|ADORA2B	-0.4017	1.2124	-1.5532
LJP008_HEPG2_24H:G19	BRD-K03406345	azacitidine	HEPG2	trt_cp	10 uM	24 h	2	373	0.543	0.455077	0	0	1	1	0	DNA inhibitor	DNMT1|DNMT3A	-0.4016	1.2096	-1.5529
CPC015_HEPG2_6H:BRD-K52397688-001-01-9:10	BRD-K52397688	amperozide	HEPG2	trt_cp	10 uM	6 h	2	98	0.13	0.114134	0	0	1	1	0	Dopamine receptor antagonist	HTR2A|DRD2|FAAH	-0.4016	1.2101	-1.5529
CPC002_HA1E_6H:BRD-K50388907-001-15-5:10	BRD-K50388907	fenofibrate	HA1E	trt_cp	10 uM	6 h	3	88	0.31	0.167014	1	1	1	1	0	PPAR receptor agonist	PPARA|APOA1|CYP2C19|CYP2C8|MMP25	-0.4016	1.2093	-1.5528
NMH002_NEU_24H:BRD-K67868012-001-03-5:10	BRD-K67868012	PI-103	NEU	trt_cp	10 uM	24 h	3	423	0.56	0.492147	0	0	1	1	0	PI3K inhibitor|MTOR inhibitor	PIK3CA|PIK3CG|MTOR|PIK3CB|PIK3CD|PRKDC	-0.4015	1.206	-1.5525
CPC018_MCF7_24H:BRD-K43978949-075-01-7:10	BRD-K43978949	PIT	MCF7	trt_cp	10 uM	24 h	4	173	0.22	0.197272	1	0	1	1	0	Purinergic receptor antagonist	P2RY1	-0.4015	1.2038	-1.5523
MOA001_A549_24H:C09	BRD-K53581288	baricitinib	A549	trt_cp	10 uM	24 h	3	160	0.35	0.23929	1	1	1	1	0	JAK inhibitor	JAK1|JAK2	-0.4014	1.2033	-1.552
LKCP002_U2OS_48H:B07	BRD-K82746043	navitoclax	U2OS	trt_cp	10 uM	48 h	4	440	0.6866	0.555788	0	0	1	1	0	BCL inhibitor	BCL2|BCL2L1|BCL2L2	-0.4012	1.2033	-1.5515
LJP007_HA1E_24H:B13	BRD-K33379087	tivantinib	HA1E	trt_cp	10 uM	24 h	2	176	0.5022	0.300625	1	1	1	1	0	Tyrosine kinase inhibitor	MET	-0.4013	1.2033	-1.5515
PAC001_U2OS_6H:BRD-K67860401-001-02-3:16.2	BRD-K67860401	AR-A014418	U2OS	trt_cp	15 uM	6 h	2	183	0.29	0.232946	0	0	1	1	0	GSK inhibitor	GSK3B	-0.4011	1.2033	-1.5511
CPC013_A375_6H:BRD-K15600710-066-01-7:10	BRD-K15600710	obatoclax	A375	trt_cp	10 uM	6 h	3	309	0.5	0.397461	1	1	1	1	0	BCL inhibitor	BCL2|BCL2L1|MCL1	-0.4011	1.2033	-1.551
LKCP001_A549_48H:H01	BRD-A81513827	saxagliptin	A549	trt_cp	10 uM	48 h	4	106	0.2056	0.149278	0	0	1	1	0	Dipeptidyl peptidase inhibitor	DPP4|CYP3A5	-0.4011	1.2033	-1.551
CPC018_SKB_24H:BRD-K15601958-001-01-3:10	BRD-K15601958	SEW-2871	SKB	trt_cp	10 uM	24 h	3	128	0.16	0.144709	0	0	1	1	0	Lysophospholipid receptor agonist	S1PR1	-0.401	1.2033	-1.5504
CVD001_HEPG2_6H:BRD-K67860401-001-02-3:2.4975	BRD-K67860401	AR-A014418	HEPG2	trt_cp	2.5 uM	6 h	3	97	0.29	0.169596	1	1	1	1	0	GSK inhibitor	GSK3B	-0.4009	1.2033	-1.5502
CRCGN005_A549_24H:BRD-K85883481:2.22222	BRD-K85883481	prednisone	A549	trt_cp	2.22 uM	24 h	3	158	0.33	0.230896	1	1	1	1	0	Glucocorticoid receptor agonist	NR3C1|HSD11B1	-0.4009	1.2033	-1.5501
REP.A027_MCF7_24H:H24	BRD-K97101532	VX-661	MCF7	trt_cp	0.04 uM	24 h	2	115	0.1561	0.135482	0	0	1	1	0	CFTR channel agonist	CFTR	-0.4009	1.2033	-1.55
MUC.CP008_P1A82_24H:O03	BRD-K25835157	PRT-062070	P1A82	trt_cp	1.11 uM	24 h	3	179	0.32	0.242009	1	1	1	1	0	JAK inhibitor|Syk inhibitor	SYK	-0.4008	1.2033	-1.5499
REP.B023_PC3_24H:C06	BRD-K68232650	lacosamide	PC3	trt_cp	0.01 uM	24 h	2	140	0.2946	0.205358	0	0	1	1	0	Collapsin response mediator protein stimulant|Sodium channel blocker	SCN3A|SCN9A|SCN1A|SCN10A|CYP2C19|DPYSL2|SCN11A|SCN2A|SCN4A|SCN5A|SCN7A|SCN8A	-0.4008	1.2033	-1.5498
CPC017_ASC_24H:BRD-K11927976-050-01-1:10	BRD-K11927976	ER-27319	ASC	trt_cp	10 uM	24 h	4	582	0.68	0.636131	0	0	1	1	0	Syk inhibitor	SYK	-0.4008	1.2033	-1.5498
LIVB002_HUH7_72H:O08	BRD-K34730807	levodopa	HUH7	trt_cp	15 uM	72 h	2	100	0.19	0.139382	0	0	1	1	0	Dopamine receptor agonist	DRD3|DDC|DRD1|DRD2|DRD4|DRD5|GPR143	-0.4007	1.2033	-1.5495
LRS001_PHH.MGH_24H:E17	BRD-A25687296	emetine	PHH	trt_cp	3.33 uM	24 h	3	621	0.85	0.734659	0	0	1	1	0	Protein synthesis inhibitor	RPS2	-0.4007	1.2033	-1.5495
POL001_HT29_24H:L05	BRD-K43389698	BMS-387032	HT29	trt_cp	0.125 uM	24 h	3	227	0.5	0.340666	1	1	1	1	0	CDK inhibitor|Cell cycle inhibitor|MCL1 inhibitor	CDK2|CDK7|CDK9|MCL1	-0.4006	1.2033	-1.5491
CPC006_HCT116_6H:BRD-K88560311-011-02-2:10	BRD-K88560311	rucaparib	HCT116	trt_cp	10 uM	6 h	2	32	0.19	0.0788465	1	1	1	1	0	PARP inhibitor	PARP1|PARP2	-0.4006	1.2033	-1.5488
LJP002_SKBR3_24H:BRD-K74065929-001-02-3:10	BRD-K74065929	doramapimod	SKBR3	trt_cp	10 uM	24 h	3	282	0.37	0.32663	0	0	1	1	0	P38 MAPK inhibitor	MAPK14|MAPK11|MAPK12|DDR2|MAPK13	-0.4005	1.2033	-1.5485
REP.A019_MCF7_24H:O13	BRD-K50564936	E-2012	MCF7	trt_cp	10 uM	24 h	3	292	0.4628	0.371722	0	0	1	1	0	Gamma secretase inhibitor	APP|APH1B	-0.4004	1.2033	-1.5484
CPC018_ASC_24H:BRD-A09533288-003-20-5:10	BRD-A09533288	verapamil	ASC	trt_cp	10 uM	24 h	3	166	0.1	0.130282	1	0	1	1	0	Calcium channel blocker	CACNA1C|CACNA1D|CACNA1G|CACNA1S|CYP2C8|CYP2E1|CYP3A5|CYP3A7|DRD2|CACNA1A|CACNA1B|CACNA1F|CACNA1I|CACNB1|CACNB2|CACNB3|CACNB4|CYP3A4|KCNA10|KCNA7|KCNH2|KCNJ11|NALCN|SCN5A|SLC29A4|SLC6A4	-0.4004	1.2033	-1.5483
CVD001_HEPG2_24H:BRD-K94512704-001-01-3:10	BRD-K94512704	spiramide	HEPG2	trt_cp	10 uM	24 h	3	448	0.71	0.570294	0	0	1	1	0	Dopamine receptor antagonist|Serotonin receptor antagonist	HTR2A|HTR1A	-0.4004	1.2033	-1.5483
REP.A023_JURKAT_24H:D01	BRD-A68281735	REV-5901	JURKAT	trt_cp	1.11 uM	24 h	3	218	0.1962	0.209126	0	0	1	1	0	Leukotriene receptor antagonist|Lipoxygenase inhibitor	ALOX5	-0.4002	1.2033	-1.5475
REP.A027_HT29_24H:M01	BRD-K98572433	AZD-8931	HT29	trt_cp	10 uM	24 h	3	393	0.4986	0.447613	0	0	1	1	0	EGFR inhibitor	ERBB2|EGFR|ERBB3	-0.4002	1.2033	-1.5474
REP.B009_HEK293_24H:C16	BRD-K28936863	ketotifen	HEK293	trt_cp	0.08 uM	24 h	2	60	0.137	0.0916783	1	0	1	1	0	Histamine receptor agonist|Leukotriene receptor antagonist|Phosphodiesterase inhibitor	HRH1|PDE4A|PDE4B|PDE4C|PDE4D|PDE7A|PDE7B|PDE8A|PDE8B|PGD	-0.4002	1.2033	-1.5472
REP.A009_HELA_24H:O24	BRD-K28470988	L-690330	HELA	trt_cp	0.04 uM	24 h	3	186	0.2975	0.237865	0	0	1	1	0	Inositol monophosphatase inhibitor	IMPA1	-0.4	1.2033	-1.5466
CPC017_A549_6H:BRD-K68341547-003-01-6:10	BRD-K68341547	W-9	A549	trt_cp	10 uM	6 h	3	239	0.03	0.0856229	1	0	1	1	0	Calmodulin inhibitor	CALM2	-0.4	1.2033	-1.5466
CPC017_HT29_6H:BRD-K93201660-001-03-2:10	BRD-K93201660	ML-7	HT29	trt_cp	10 uM	6 h	5	160	0.1	0.127906	0	0	1	1	0	Muscle relaxant	MYLK	-0.3999	1.2033	-1.5464
CPC018_ASC_24H:BRD-K08619574-334-03-9:10	BRD-K08619574	thioproperazine	ASC	trt_cp	10 uM	24 h	3	404	0.27	0.333967	0	0	1	1	0	Dopamine receptor antagonist	ADRA1A|ADRA1B|DRD1|DRD2|HTR1A|HTR2A	-0.3999	1.2033	-1.5461
CPC018_A375_6H:BRD-K06753942-001-06-1:10	BRD-K06753942	nobiletin	A375	trt_cp	10 uM	6 h	5	381	0.31	0.347515	0	0	1	1	0	MEK inhibitor	ABCB1|TYR|MAP2K1	-0.3998	1.2033	-1.5458
LIVB001_HUH7_72H:B21	BRD-K16444452	ibudilast	HUH7	trt_cp	15 uM	72 h	3	68	0.03	0.0456715	0	0	1	1	0	Phosphodiesterase inhibitor|Leukotriene receptor antagonist	PDE4A|PDE4B|PDE4C|MIF|PDE10A|PDE4D|TLR4|PDE3A|CYSLTR1|PDE11A|IL1B|IL6|PDE5A	-0.3997	1.2033	-1.5454
REP.A027_A375_24H:H06	BRD-K95880107	PH-797804	A375	trt_cp	0.04 uM	24 h	3	202	0.2022	0.20436	0	0	1	1	0	P38 MAPK inhibitor	MAPK14|MAPK11	-0.3997	1.2033	-1.5454
REP.B022_HELA_24H:B13	BRD-K76908866	CP-724714	HELA	trt_cp	2.22 uM	24 h	2	79	0.3035	0.156575	1	1	1	1	0	Tyrosine kinase inhibitor|EGFR inhibitor	ERBB2	-0.3996	1.2033	-1.545
CPC017_ASC_24H:BRD-K10870738-001-02-4:10	BRD-K10870738	CDC	ASC	trt_cp	10 uM	24 h	3	137	0.26	0.190844	1	1	1	1	0	Lipoxygenase inhibitor	ALOX12	-0.3994	1.2033	-1.5443
REP.B018_HEK293_24H:G04	BRD-K63736853	acipimox	HEK293	trt_cp	0.08 uM	24 h	2	85	0.1269	0.10502	0	0	1	1	0	Cholesterol inhibitor	HCAR2	-0.3994	1.2033	-1.5442
EMU001_OCILY3_24H:E01	BRD-A82772293	mepazine	OCILY3	trt_cp	10 uM	24 h	2	259	0.4505	0.345404	1	1	1	1	0	Mucus protecting agent	MALT1	-0.3993	1.2033	-1.5441
CPC016_ASC_24H:BRD-K63504947-001-05-5:10	BRD-K63504947	semaxanib	ASC	trt_cp	10 uM	24 h	3	280	0.48	0.370707	0	0	1	1	0	VEGFR inhibitor	KDR|FLT1|KIT|PDGFRB|FLT3|MET|FGFR1|PDGFRA|RET	-0.3992	1.2033	-1.5436
EMU001_OCILY3_24H:M01	BRD-K19295594	gossypol	OCILY3	trt_cp	10 uM	24 h	3	442	0.5872	0.515151	1	1	1	1	0	BCL inhibitor|MCL1 inhibitor	BCL2|BCL2L1|MCL1|BCL2L2|CTGF|EGF	-0.3991	1.2033	-1.543
AICHI001_BJAB_4H:K01	BRD-K92428232	GSK-461364	BJAB	trt_cp	10 uM	4 h	3	176	0.26	0.216308	0	0	1	1	0	PLK inhibitor	PLK1	-0.3991	1.2033	-1.543
EMU001_BJAB_3H:A13	BRD-K48443249	CNX-774	BJAB	trt_cp	10 uM	3 h	3	242	0.4076	0.317582	0	0	1	1	0	BTK inhibitor	BTK	-0.399	1.2033	-1.5428
CPC004_VCAP_6H:BRD-A79981887-003-09-9:10	BRD-A79981887	midodrine	VCAP	trt_cp	10 uM	6 h	4	97	0.12	0.109096	1	0	1	1	0	Adrenergic receptor agonist	ADRA1A|ADRA1B|ADRA1D	-0.399	1.2033	-1.5427
DOSVAL004_HCC515_24H:BRD-K21680192:5	BRD-K21680192	mitoxantrone	HCC515	trt_cp	4 uM	24 h	3	582	0.52	0.55628	1	1	1	1	0	Topoisomerase inhibitor	TOP2A|PIM1	-0.3989	1.2033	-1.5423
REP.B026_HA1E_24H:A18	BRD-A87479750	tenidap	HA1E	trt_cp	0.01 uM	24 h	2	136	0.363	0.224674	1	1	1	1	0	Cyclooxygenase inhibitor	ALOX5|KCNJ4|PTGS1	-0.3988	1.2033	-1.5421
CPD002_MCF7_24H:BRD-K46317332-003-13-7:10	BRD-K46317332	proadifen	MCF7	trt_cp	10 uM	24 h	3	126	0.28	0.189931	1	0	1	1	0	Nitric oxide synthase inhibitor	NOS1	-0.3988	1.2033	-1.542
CPC017_A375_6H:BRD-K52459643-001-10-2:10	BRD-K52459643	alprostadil	A375	trt_cp	10 uM	6 h	3	138	0.07	0.0993846	0	0	1	1	0	Prostanoid receptor agonist	PTGER1|PTGER2|CATSPER1|CATSPER2|CATSPER3|CATSPER4|PTGDR|PTGER4|PTGIR	-0.3988	1.2033	-1.542
REP.B010_HA1E_24H:F01	BRD-A12896037	cisapride	HA1E	trt_cp	2.22 uM	24 h	2	100	0.2923	0.17288	1	1	1	1	0	Serotonin receptor agonist	HTR4|KCNH2|CYP2B6|CYP2C8|CYP3A5|CYP3A7|HTR2A|HTR3A	-0.3987	1.2033	-1.5416
REP.A026_A549_24H:H03	BRD-K89917372	retigabine	A549	trt_cp	1.11 uM	24 h	2	90	0.133	0.110631	0	0	1	1	0	Potassium channel activator	KCNQ2|KCNQ3|KCNQ4|KCNQ5|ABAT|KCNQ1	-0.3985	1.2033	-1.5408
LIVB002_HUH7_72H:G03	BRD-K11433652	aspirin	HUH7	trt_cp	20 uM	72 h	3	131	0.21	0.167717	0	0	1	1	0	Cyclooxygenase inhibitor	PTGS1|PTGS2|TP53|AKR1C1|ASIC3|EDNRA|HSPA5|IKBKB|NFKB1|NFKB2|NFKBIA|PRKAA1|PRKAA2|PRKAB1|PRKAB2|PRKAG1|PRKAG2|PRKAG3|RPS6KA3	-0.3983	1.2033	-1.5402
REP.A009_HUVEC.A_24H:I01	BRD-K28115081	apafant	HUVEC	trt_cp	10 uM	24 h	3	289	0.5203	0.392109	1	1	1	1	0	Platelet activating factor receptor antagonist	PTAFR	-0.3983	1.2033	-1.5402
CPC017_PHH_24H:BRD-K45068323-003-02-1:10	BRD-K45068323	W-13	PHH	trt_cp	10 uM	24 h	3	225	0.25	0.239824	0	0	1	1	0	Calmodulin inhibitor	CALM1|MYLK|PDE1A	-0.3982	1.2033	-1.5398
CPC006_HCT116_6H:BRD-K26664453-001-03-4:10	BRD-K26664453	BRD-K26664453	HCT116	trt_cp	10 uM	6 h	2	26	0.26	0.0831388	1	1	1	1	0	Tubulin inhibitor	ACTB	-0.3981	1.2033	-1.5391
REP.B027_MCF7_24H:D05	BRD-K93208532	apremilast	MCF7	trt_cp	0.03 uM	24 h	2	57	0.2056	0.109466	1	1	1	1	0	Phosphodiesterase inhibitor	PDE4A|PDE4B|PDE4C|PDE4D|TNF|TNFRSF1A	-0.398	1.2033	-1.539
MOAR001_A375_24H:H08	BRD-K61128465	mdivi-1	A375	trt_cp	6.66 uM	24 h	2	90	0.1672	0.124042	1	1	1	1	0	Dynamin inhibitor	DNM1	-0.398	1.2033	-1.5387
CPC018_ASC_24H:BRD-K51662849-001-03-9:10	BRD-K51662849	ilomastat	ASC	trt_cp	10 uM	24 h	3	361	0.17	0.250501	0	0	1	1	0	Matrix metalloprotease inhibitor	ACAN|ADAM28|MMP1|MMP12|MMP13|MMP14|MMP2|MMP3|MMP8|MMP9	-0.398	1.2033	-1.5387
REP.B011_HA1E_24H:M24	BRD-A07563059	bopindolol	HA1E	trt_cp	0.01 uM	24 h	2	82	0.2059	0.131391	1	1	1	1	0	Adrenergic receptor antagonist	ADRB1|ADRB2|ADRB3|HTR1A|HTR1B	-0.3979	1.2033	-1.5384
REP.B020_HT29_24H:I14	BRD-K45117373	Y-26763	HT29	trt_cp	0.74 uM	24 h	2	64	0.2317	0.123136	1	1	1	1	0	Potassium channel activator	KCNJ8|ABCC9	-0.3978	1.2033	-1.5383
REP.A025_PC3_24H:F24	BRD-K91301684	noscapine	PC3	trt_cp	0.04 uM	24 h	2	94	0.4007	0.196248	1	1	1	1	0	Bradykinin receptor antagonist|Tubulin polymerization inhibitor	BDKRB2|SIGMAR1	-0.3978	1.2033	-1.5382
PAC002_U2OS_6H:BRD-K48735772-001-01-4:10	BRD-K48735772	PD-158780	U2OS	trt_cp	10 uM	6 h	2	132	0.36	0.220429	0	0	1	1	0	EGFR inhibitor	EGFR	-0.3978	1.2031	-1.538
CPC010_HEPG2_6H:BRD-A56245458-001-07-3:10	BRD-A56245458	reichstein	HEPG2	trt_cp	10 uM	6 h	3	150	0.23	0.187819	1	0	1	1	0	Androgen receptor antagonist	AR	-0.3977	1.2028	-1.5377
CPC018_SKB_24H:BRD-K06753942-001-06-1:10	BRD-K06753942	nobiletin	SKB	trt_cp	10 uM	24 h	3	182	0.42	0.27957	1	0	1	1	0	MEK inhibitor	ABCB1|TYR|MAP2K1	-0.3976	1.2025	-1.5375
REP.B007_HELA_24H:E02	BRD-K37111771	trientine	HELA	trt_cp	0.74 uM	24 h	2	195	0.5057	0.317537	0	0	1	1	0	Chelating agent	CA14	-0.3976	1.2025	-1.5375
PCL001_HEPG2_24H:BRD-K13094524:10	BRD-K13094524	PFI-1	HEPG2	trt_cp	10 uM	24 h	3	259	0.52	0.371092	1	1	1	1	0	Bromodomain inhibitor	BRD4	-0.3976	1.2024	-1.5374
REP.B009_A549_24H:F18	BRD-A29854054	lorglumide	A549	trt_cp	0.01 uM	24 h	2	76	0.1064	0.0909302	1	0	1	1	0	CCK receptor antagonist	CCKAR|CCKBR	-0.3976	1.2024	-1.5374
CPC018_NPC_24H:BRD-K12932420-001-01-5:10	BRD-K12932420	YM-976	NPC	trt_cp	10 uM	24 h	3	117	0.22	0.162231	0	0	1	1	0	Phosphodiesterase inhibitor	PDE4A|PDE4B|PDE4C|PDE4D|TNF	-0.3976	1.2025	-1.5374
MOA001_U2OS_24H:C09	BRD-K53581288	baricitinib	U2OS	trt_cp	10 uM	24 h	3	153	0.37	0.24059	1	1	1	1	0	JAK inhibitor	JAK1|JAK2	-0.3975	1.202	-1.5371
CPC016_A549_6H:BRD-K92760278-001-02-4:10	BRD-K92760278	riboflavin	A549	trt_cp	10 uM	6 h	2	222	0.36	0.285863	0	0	1	1	0	Vitamin B	BLVRB|RFK	-0.3975	1.2017	-1.537
REP.B013_HA1E_24H:N01	BRD-K42981054	mibampator	HA1E	trt_cp	2.22 uM	24 h	2	453	0.6988	0.568926	0	0	1	1	0	Glutamate receptor antagonist	GRIA1	-0.3975	1.2017	-1.537
LJP009_NPC.CAS9_24H:C07	BRD-K97056771	GNF-2	NPC	trt_cp	10 uM	24 h	3	110	0.1796	0.142128	1	1	1	1	0	Bcr-Abl inhibitor	ABL1|BCR	-0.3975	1.2015	-1.5369
REP.A028_YAPC_24H:M19	BRD-K97010173	deferasirox	YAPC	trt_cp	10 uM	24 h	2	346	0.5511	0.441554	0	0	1	1	0	Chelating agent	CYP2C19|CYP2C8|CYP3A4	-0.3974	1.2004	-1.5365
CPC014_A375_6H:N16	BRD-K85985071	ellipticine	A375	trt_cp	10 uM	6 h	2	290	0.4267	0.355706	1	1	1	1	0	Topoisomerase inhibitor	TOP2A|TOP2B	-0.3972	1.1921	-1.536
REP.A025_HA1E_24H:J01	BRD-A74667430	etodolac	HA1E	trt_cp	10 uM	24 h	3	116	0.1635	0.139257	1	0	1	1	0	Cyclooxygenase inhibitor	PTGS2|TRPV1|PTGS1|RXRA	-0.3972	1.1921	-1.536
REP.B024_A549_24H:B21	BRD-K73794685	azithromycin	A549	trt_cp	0.25 uM	24 h	2	238	0.4412	0.32767	1	1	1	1	0	Bacterial 50S ribosomal subunit inhibitor	MLNR	-0.3972	1.1921	-1.5358
CPC006_NOMO1_6H:BRD-K15108141-001-01-7:0.08	BRD-K15108141	gemcitabine	NOMO1	trt_cp	0.08 uM	6 h	2	212	0.06	0.114044	1	0	1	1	0	Ribonucleoside reductase inhibitor	RRM1|CMPK1|RRM2|TYMS	-0.3971	1.1921	-1.5356
CPC006_VCAP_6H:BRD-K80527266-001-01-7:10	BRD-K80527266	triacsin-c	VCAP	trt_cp	10 uM	6 h	4	123	0.26	0.18083	1	0	1	1	0	Adrenergic receptor antagonist	ACSL1	-0.3971	1.1921	-1.5356
REP.B013_HUVEC.A_24H:M17	BRD-K43164539	cholic-acid	HUVEC	trt_cp	0.03 uM	24 h	2	251	0.0348	0.0945055	0	0	1	1	0	Bile acid	CES1|FECH|PLA2G1B|ADH1C|COX1|COX2|COX3|COX4I1|COX5A|COX5B|COX6A2|COX6B1|COX6C|COX7A1|COX7B|COX7C|COX8A|ESRRG|FABP6|GPBAR1	-0.3971	1.1921	-1.5354
CPC006_U937_6H:BRD-K73789395-001-06-5:102.71	BRD-K73789395	ZM-336372	U937	trt_cp	100 uM	6 h	2	182	0.5	0.305036	1	1	1	1	0	RAF inhibitor	BRAF|LCK|MAPK14|RAF1	-0.3971	1.1921	-1.5354
LJP009_CD34_24H:H19	BRD-K79259477	NVP-BHG712	CD34	trt_cp	10 uM	24 h	3	358	0.5773	0.459698	0	0	1	1	0	Ephrin inhibitor	EPHB4	-0.397	1.1921	-1.5349
CPC015_ASC_24H:BRD-K82255054-001-08-4:10	BRD-K82255054	propofol	ASC	trt_cp	10 uM	24 h	4	157	0.26	0.204299	0	0	1	1	0	GABA receptor agonist	GABRA1|GABRA2|GABRA3|GABRA4|GABRA5|GABRA6|GABRB1|GABRB2|GABRB3|GABRD|GABRE|GABRG1|GABRG2|GABRG3|GABRP|GABRQ|CYP2B6|TRPV1|FAAH|SCN2A|SCN4A	-0.3968	1.1921	-1.5344
CPC003_HCC515_24H:BRD-A41145729-001-02-7:10	BRD-A41145729	methoprene-acid	HCC515	trt_cp	10 uM	24 h	3	79	0.19	0.123886	1	0	1	1	0	Retinoid receptor agonist	RXRA	-0.3967	1.1921	-1.5337
REP.B006_MCF7_24H:F24	BRD-K20079257	rufinamide	MCF7	trt_cp	0.01 uM	24 h	2	150	0.2951	0.212746	0	0	1	1	0	Voltage-gated sodium channel blocker	SCN1A|SCN3A|SCN9A|CYP2E1|CYP3A4|GRM5|SCN10A|SCN11A|SCN2A|SCN4A|SCN5A|SCN7A|SCN8A	-0.3967	1.1921	-1.5337
EMU001_NALM6_24H:H21	BRD-K71223042	PCI-29732	NALM6	trt_cp	0.66 uM	24 h	3	92	0.2037	0.138427	1	1	1	1	0	BTK inhibitor	BTK	-0.3966	1.1921	-1.5334
CPC018_ASC_24H:BRD-K78126613-001-16-0:10	BRD-K78126613	menadione	ASC	trt_cp	10 uM	24 h	3	218	0.25	0.236063	1	0	1	1	0	Mitochondrial inhibitor|Phosphatase inhibitor	PKM|AOX1|BGLAP|F10|F2|F7|F9|GGCX|NQO1|NQO2|PROC|PROS1|PROZ|VKORC1|VKORC1L1	-0.3964	1.1921	-1.5328
REP.A017_YAPC_24H:A07	BRD-K50163129	acrivastine	YAPC	trt_cp	10 uM	24 h	3	139	0.1431	0.142613	1	0	1	1	0	Histamine receptor antagonist	HRH1	-0.3964	1.1921	-1.5327
REP.B010_MCF10A_24H:I20	BRD-K14175878	MK-0812	MCF10A	trt_cp	0.74 uM	24 h	2	119	0.3523	0.207043	0	0	1	1	0	CC chemokine receptor antagonist	CCR2	-0.3963	1.1921	-1.5322
LJP005_HS578T_24H:E07	BRD-K93788137	PF-431396	HS578T	trt_cp	10 uM	24 h	3	627	0.77	0.702603	0	0	1	1	0	Focal adhesion kinase inhibitor	PTK2|PTK2B	-0.3962	1.1921	-1.532
CPC012_A549_24H:BRD-K18855837-046-01-4:10	BRD-K18855837	varenicline	A549	trt_cp	10 uM	24 h	2	732	0.54	0.635745	0	0	1	1	0	Acetylcholine receptor agonist	CHRNA4|CHRNB2|CHRNA3|CHRNA6|CHRNA7	-0.3962	1.1921	-1.5318
REP.A014_MCF10A_24H:L11	BRD-K37714784	ABT-724	MCF10A	trt_cp	0.125 uM	24 h	3	221	0.2231	0.224531	0	0	1	1	0	Dopamine receptor agonist	DRD4	-0.3962	1.1921	-1.5318
LJP008_HCC515_24H:P14	BRD-K14109347	LY-2603618	HCC515	trt_cp	3.33 uM	24 h	3	221	0.5566	0.354649	1	1	1	1	0	CHK inhibitor	CHEK1	-0.3959	1.1921	-1.5309
REP.A015_THP1_24H:B12	BRD-K55748775	SCH-28080	THP1	trt_cp	0.04 uM	24 h	2	138	0.186	0.162004	0	0	1	1	0	ATPase inhibitor	ATP4A	-0.3959	1.1921	-1.5306
LKCP001_A549_48H:E13	BRD-K84091759	candesartan	A549	trt_cp	10 uM	48 h	4	74	0.3085	0.152783	1	1	1	1	0	Angiotensin receptor antagonist	AGTR1	-0.3958	1.1921	-1.5304
LKCP001_U2OS_24H:N04	BRD-K37991163	paroxetine	U2OS	trt_cp	10 uM	24 h	5	471	0.5706	0.524212	1	1	1	1	0	Selective serotonin reuptake inhibitor (SSRI)	SLC6A4|CHRM1|CHRM2|CHRM3|CHRM4|CHRM5|HTR2A|SLC6A2	-0.3957	1.1921	-1.5301
CPC007_PC3_24H:BRD-A28422330-001-07-7:10	BRD-A28422330	ML-141	PC3	trt_cp	10 uM	24 h	4	131	0.09	0.109796	0	0	1	1	0	CDC inhibitor	CDC42	-0.3957	1.192	-1.5299
CPC015_ASC_24H:BRD-A49160188-003-04-4:10	BRD-A49160188	donepezil	ASC	trt_cp	10 uM	24 h	4	171	0.12	0.14485	0	0	1	1	0	Acetylcholinesterase inhibitor	ACHE|HTR2A	-0.3956	1.1918	-1.5298
CPC005_A375_24H:BRD-A59303141-001-03-9:10	BRD-A59303141	quinethazone	A375	trt_cp	10 uM	24 h	3	133	0.27	0.191619	1	1	1	1	0	Thiazide diuretic	SLC12A3|CA1|CA2|SLC12A1|SLC12A2	-0.3956	1.1916	-1.5296
CPC012_PHH_24H:BRD-K87909389-003-01-8:10	BRD-K87909389	alvocidib	PHH	trt_cp	10 uM	24 h	3	471	0.48	0.480797	0	0	1	1	0	CDK inhibitor	CDK2|CDK4|CDK1|CDK6|CDK7|CDK9|CDK5|CDK8|EGFR|PYGM|BCL2|BIRC5|CCNT1|MCL1|XIAP	-0.3955	1.1899	-1.5292
REP.A002_HELA_24H:K13	BRD-K17561142	amiodarone	HELA	trt_cp	10 uM	24 h	3	218	0.4447	0.314842	1	1	1	1	0	Potassium channel antagonist	KCNH2|CHRM3|CYP2C8|SCN5A|ADRB1|CACNA1H|CACNA2D2|KCNA7	-0.3954	1.1884	-1.529
LJP007_ASC_24H:E01	BRD-K43002773	GDC-0068	ASC	trt_cp	10 uM	24 h	3	274	0.4892	0.370211	0	0	1	1	0	AKT inhibitor	AKT1|AKT2|AKT3|CYP3A5|PRKG1	-0.3954	1.1851	-1.5288
CPC002_HA1E_6H:BRD-K31843556-001-01-7:10	BRD-K31843556	T-0070907	HA1E	trt_cp	10 uM	6 h	3	165	0.39	0.25651	1	1	1	1	0	PPAR receptor antagonist	PPARG	-0.3954	1.183	-1.5287
CPC006_AGS_6H:BRD-K96354014-001-09-6:10	BRD-K96354014	nifedipine	AGS	trt_cp	10 uM	6 h	2	94	0.37	0.18858	1	1	1	1	0	Calcium channel blocker	CACNA1C|CACNA1D|CACNA1S|CACNA1F|CACNA2D1|CYP3A5|CACNA1H|CACNB2|CALM1|GLRA1|GLRA3|GLRB|KCNA1|KCNA5|NR1I2|TRPM3	-0.3954	1.1831	-1.5287
REP.A017_HA1E_24H:B19	BRD-A50998626	palomid-529	HA1E	trt_cp	10 uM	24 h	3	434	0.6934	0.554712	1	1	1	1	0	AKT inhibitor|FGFR inhibitor|MTOR inhibitor|VEGFR inhibitor	MTOR|FGF2	-0.3953	1.1789	-1.5286
NMH001_FIBRNPC_6H:BRD-K58930050-001-03-7:10	BRD-K58930050	BRD-K58930050	NPC	trt_cp	10 uM	6 h	2	354	0.47	0.412459	0	0	1	1	0	Glutamate receptor antagonist	GRIN1|GRIN2A|GRIN2B|GRIN2C|GRIN2D	-0.3953	1.1764	-1.5285
CPC015_NPC_24H:BRD-A01320529-001-05-9:10	BRD-A01320529	salmeterol	NPC	trt_cp	10 uM	24 h	4	146	0.18	0.163924	1	0	1	1	0	Adrenergic receptor agonist	ADRB2	-0.3953	1.1676	-1.5284
REP.B024_HEK293_24H:F01	BRD-K74765201	tomelukast	HEK293	trt_cp	0.22 uM	24 h	2	84	0.0872	0.0865423	0	0	1	1	0	Leukotriene receptor antagonist	CYSLTR1	-0.395	1.1635	-1.5275
LJP002_MDAMB231_24H:BRD-K72414522-001-01-8:2	BRD-K72414522	AZD-5438	MDAMB231	trt_cp	2.22 uM	24 h	3	250	0.49	0.353915	0	0	1	1	0	CDK inhibitor	CCNB1|CCNE1|CDK1|CDK2|KCNH2	-0.3951	1.1635	-1.5275
LJP005_A375_24H:J21	BRD-K03063480	PF-477736	A375	trt_cp	1.11 uM	24 h	2	216	0.5959	0.362781	1	1	1	1	0	CHK inhibitor	CHEK1|CHEK2	-0.395	1.1635	-1.5274
CPC017_HEPG2_6H:BRD-K68392338-003-01-2:10	BRD-K68392338	ZK-93426	HEPG2	trt_cp	10 uM	6 h	3	202	0.15	0.176016	1	0	1	1	0	Benzodiazepine receptor antagonist	GABRA1|GABRA2|GABRA3|GABRA5	-0.395	1.1635	-1.5273
CPC001_PC3_6H:BRD-K10177585-003-01-6:10	BRD-K10177585	PSB-11	PC3	trt_cp	10 uM	6 h	4	127	0.16	0.144143	1	0	1	1	0	Adenosine receptor antagonist	ADORA3|ADORA1|ADORA2A	-0.395	1.1635	-1.5271
CPC013_SKB_24H:BRD-K15600710-066-01-7:10	BRD-K15600710	obatoclax	SKB	trt_cp	10 uM	24 h	4	401	0.54	0.470543	0	0	1	1	0	BCL inhibitor	BCL2|BCL2L1|MCL1	-0.3949	1.1635	-1.5269
CPC015_PHH_24H:BRD-K59753853-001-01-5:10	BRD-K59753853	MDL-29951	PHH	trt_cp	10 uM	24 h	2	302	0.4	0.35145	0	0	1	1	0	Glutamate receptor antagonist	FBP1|GPR17	-0.3949	1.1635	-1.5269
CPC018_HEPG2_6H:BRD-K14993104-001-03-4:10	BRD-K14993104	bemegride	HEPG2	trt_cp	10 uM	6 h	3	94	0.06	0.0759399	1	0	1	1	0	Chemoreceptor agonist	GABRA1	-0.3949	1.1635	-1.5269
CPC015_ASC_24H:BRD-A41301928-001-02-5:10	BRD-A41301928	bongkrek-acid	ASC	trt_cp	10 uM	24 h	4	420	0.27	0.340516	0	0	1	1	0	Mitochondrial inhibitor	SLC25A4	-0.3949	1.1635	-1.5268
CPC016_ASC_24H:BRD-K18574842-323-03-3:10	BRD-K18574842	nafcillin	ASC	trt_cp	10 uM	24 h	3	271	0.32	0.297776	0	0	1	1	0	Bacterial cell wall synthesis inhibitor	CYP3A4|CYP1A2|SLC22A6	-0.3948	1.1635	-1.5267
CPC016_ASC_24H:BRD-K76775527-001-15-3:10	BRD-K76775527	nimesulide	ASC	trt_cp	10 uM	24 h	3	395	0.14	0.23779	1	0	1	1	0	Cyclooxygenase inhibitor	PTGS2|LTF|PLA2G2E|PTGS1	-0.3947	1.1632	-1.5261
REP.A028_HEK293_24H:G01	BRD-K93918653	quizartinib	HEK293	trt_cp	10 uM	24 h	2	131	0.2915	0.197599	0	0	1	1	0	FLT3 inhibitor	FLT3|CSF1R|KIT|RET|PDGFRA|PDGFRB	-0.3946	1.1629	-1.5259
CPD003_MCF7_24H:B20	BRD-A33749298	oxyphenbutazone	MCF7	trt_cp	10 uM	24 h	3	79	0.1239	0.100041	1	0	1	1	0	Cyclooxygenase inhibitor	PLA2G2E|PTGS1|PTGS2	-0.3946	1.1623	-1.5257
LJP005_BT20_24H:E07	BRD-K93788137	PF-431396	BT20	trt_cp	10 uM	24 h	3	632	0.7	0.672571	0	0	1	1	0	Focal adhesion kinase inhibitor	PTK2|PTK2B	-0.3945	1.1617	-1.5255
REP.A022_MCF10A_24H:F20	BRD-K70358946	aripiprazole	MCF10A	trt_cp	3.33 uM	24 h	2	152	0.3475	0.232397	0	0	1	1	0	Serotonin receptor agonist|Serotonin receptor antagonist	DRD2|HTR1A|HTR2A|HRH1|HTR1B|HTR1D|HTR2C|ADRA1A|ADRA1B|ADRA2A|ADRA2B|ADRA2C|CHRM1|CHRM2|CHRM3|CHRM4|CHRM5|DRD1|DRD3|DRD4|DRD5|HTR1E|HTR3A|HTR6|HTR7	-0.3944	1.1612	-1.5251
CPC014_NPC_24H:BRD-K30743633-001-06-6:10	BRD-K30743633	TCPOBOP	NPC	trt_cp	10 uM	24 h	3	248	0.31	0.280374	0	0	1	1	0	CAR agonist	NR1I3	-0.3944	1.1608	-1.525
CPC011_VCAP_24H:BRD-K18909381-050-07-8:10	BRD-K18909381	CGS-12066B	VCAP	trt_cp	10 uM	24 h	5	310	0.21	0.258001	1	0	1	1	0	Serotonin receptor agonist	HTR1B	-0.3944	1.1607	-1.5249
CPC016_ASC_24H:BRD-K62996583-001-03-8:10	BRD-K62996583	lidoflazine	ASC	trt_cp	10 uM	24 h	3	193	0.42	0.287895	1	0	1	1	0	Calcium channel blocker	SCN1A|SCN3A|SLC29A1	-0.3942	1.1582	-1.5244
MOAR003_PC3_24H:E11	BRD-K21908111	AZD-1208	PC3	trt_cp	3.33 uM	24 h	2	54	0.186	0.101341	1	1	1	1	0	PIM inhibitor	PIM1|PIM2|PIM3	-0.3942	1.1576	-1.5243
REP.A024_A375_24H:E02	BRD-K74763371	bosentan	A375	trt_cp	3.33 uM	24 h	3	108	0.3255	0.189591	1	1	1	1	0	Endothelin receptor antagonist	EDNRB|EDNRA|ABCB1|CYP2C19|CYP3A4	-0.3942	1.1553	-1.5241
CVD001_HEPG2_24H:BRD-K22134346-001-11-6:10	BRD-K22134346	simvastatin	HEPG2	trt_cp	10 uM	24 h	3	158	0.42	0.260486	1	1	1	1	0	HMGCR inhibitor	HMGCR|CYP2C8|CYP3A4|CYP3A5|ITGB2	-0.3941	1.1458	-1.5239
ASG002_PC3_24H:C07	BRD-K11853856	PJ-34	PC3	trt_cp	10 uM	24 h	3	284	0.5709	0.407164	1	1	1	1	0	PARP inhibitor	EEF2|PARP1|PARP15|PARP3	-0.3941	1.143	-1.5238
REP.A020_JURKAT_24H:O10	BRD-K48892307	sasapyrine	JURKAT	trt_cp	0.37 uM	24 h	2	113	0.197	0.15087	0	0	1	1	0	NFKB inhibitor	PTGS1|PTGS2	-0.3941	1.1417	-1.5237
CPC017_HEPG2_6H:BRD-K52459643-001-10-2:10	BRD-K52459643	alprostadil	HEPG2	trt_cp	10 uM	6 h	3	217	0.25	0.235521	1	0	1	1	0	Prostanoid receptor agonist	PTGER1|PTGER2|CATSPER1|CATSPER2|CATSPER3|CATSPER4|PTGDR|PTGER4|PTGIR	-0.3939	1.1389	-1.5232
REP.A016_A375_24H:L01	BRD-K54847683	equol	A375	trt_cp	10 uM	24 h	3	150	0.3863	0.24341	1	1	1	1	0	Estrogen receptor agonist	ESR2|ESR1	-0.3937	1.1369	-1.5224
MOA001_U2OS_24H:O05	BRD-A25687296	emetine	U2OS	trt_cp	10 uM	24 h	3	665	0.84	0.755755	0	0	1	1	0	Protein synthesis inhibitor	RPS2	-0.3937	1.137	-1.5224
REP.A014_MCF10A_24H:A13	BRD-K55966568	orantinib	MCF10A	trt_cp	10 uM	24 h	3	178	0.215	0.197815	1	1	1	1	0	PDGFR inhibitor|FGFR inhibitor|VEGFR inhibitor	KDR|PDGFRB|FGFR1|AURKA|AURKB|PDGFRA|TBK1|EGFR|FGFR2	-0.3937	1.1367	-1.5223
CPC017_ASC_24H:BRD-K50018155-003-01-3:10	BRD-K50018155	RS-67506	ASC	trt_cp	10 uM	24 h	4	250	0.09	0.151678	1	0	1	1	0	Serotonin receptor agonist	HTR4	-0.3936	1.1348	-1.5219
REP.A007_HELA_24H:N09	BRD-K48168960	propylthiouracil	HELA	trt_cp	1.11 uM	24 h	3	181	0.3205	0.243548	1	1	1	1	0	Thyroid peroxidase inhibitor	TPO|DIO1	-0.3936	1.1348	-1.5219
LJP007_JURKAT_24H:G01	BRD-K21718444	KW-2449	JURKAT	trt_cp	10 uM	24 h	2	329	0.5567	0.432752	0	0	1	1	0	Abl inhibitor|Aurora kinase inhibitor|FLT3 inhibitor	FLT3|ABL1|AURKA|FGFR1|AURKB	-0.3936	1.1348	-1.5218
NMH002_FIBRNPC_24H:BRD-K49685476-001-11-8:10	BRD-K49685476	TTNPB	NPC	trt_cp	10 uM	24 h	3	123	0.23	0.170078	1	1	1	1	0	Retinoid receptor agonist	RARB|RARA|RARG	-0.3935	1.1348	-1.5215
CPC002_HA1E_6H:BRD-A80502530-001-01-2:10	BRD-A80502530	cinobufagin	HA1E	trt_cp	10 uM	6 h	3	314	0.64	0.4533	1	1	1	1	0	Na/K-ATPase inhibitor	ATP1A1	-0.3934	1.1348	-1.5212
CPC018_A549_6H:BRD-K96084870-001-01-9:10	BRD-K96084870	DMBI	A549	trt_cp	10 uM	6 h	3	139	0.18	0.159946	1	0	1	1	0	PDGFR inhibitor|VEGFR inhibitor	PDGFRB	-0.3934	1.1348	-1.521
CPC017_ASC_24H:BRD-K43389675-001-01-3:10	BRD-K43389675	daunorubicin	ASC	trt_cp	10 uM	24 h	2	672	0.7	0.693528	0	0	1	1	0	RNA synthesis inhibitor|Topoisomerase inhibitor	TOP2A|TOP2B	-0.3934	1.1348	-1.521
CPC018_SKB_24H:BRD-K97181089-003-14-8:10	BRD-K97181089	amiloride	SKB	trt_cp	10 uM	24 h	3	292	0.3	0.299283	0	0	1	1	0	Sodium channel inhibitor	SCNN1A|ASIC1|ASIC2|SCNN1B|SCNN1G|AOC1|ASIC3|PKD2|PKD2L1|PLAU|SCNN1D|SLC9A1|TRPC7|TRPV2	-0.3934	1.1348	-1.521
LJP002_SKBR3_6H:BRD-K59184148-001-12-5:10	BRD-K59184148	SB-216763	SKBR3	trt_cp	10 uM	6 h	3	120	0.42	0.22701	0	0	1	1	0	GSK inhibitor	GSK3B|CCNA2|CDK2|GSK3A	-0.3933	1.1348	-1.5208
CPC017_SKB_24H:BRD-K35559145-050-03-6:10	BRD-K35559145	levomepromazine	SKB	trt_cp	10 uM	24 h	2	33	0.2	0.082149	0	0	1	1	0	Dopamine receptor antagonist	DRD2|DRD3|DRD4|ADRA1A|ADRA1B|ADRA1D|ADRA2A|ADRA2B|ADRA2C|CHRM1|CHRM2|CHRM3|CHRM4|CHRM5|DRD1|DRD5|HRH1|HTR2A|HTR2C	-0.3932	1.1348	-1.5205
REP.B008_MCF7_24H:N01	BRD-A87983072	benzotript	MCF7	trt_cp	2.22 uM	24 h	2	125	0.2205	0.167876	1	1	1	1	0	CCK receptor antagonist	CCKBR|CCKAR	-0.3931	1.1348	-1.5201
PAC001_U2OS_6H:BRD-K67511046-003-03-7:5.49699	BRD-K67511046	naloxone	U2OS	trt_cp	6.66 uM	6 h	2	145	0.11	0.127706	0	0	1	1	0	Opioid receptor antagonist	OPRM1|OPRK1|OPRD1|CREB1|ESR1|TLR4	-0.3931	1.1348	-1.5199
REP.B026_HT29_24H:F05	BRD-K89162000	tandutinib	HT29	trt_cp	0.03 uM	24 h	2	102	0.2401	0.158244	1	1	1	1	0	FLT3 inhibitor|KIT inhibitor|PDGFR inhibitor	FLT3|KIT|PDGFRA|PDGFRB|CSF1R|PDGFD	-0.3931	1.1348	-1.5198
LJP007_SKL.C_24H:L01	BRD-K37720887	SB-525334	SKL	trt_cp	10 uM	24 h	3	174	0.3825	0.260868	1	1	1	1	0	TGF-beta receptor inhibitor	TGFBR1	-0.393	1.1348	-1.5196
REP.B025_HELA_24H:E18	BRD-K88544581	CI-976	HELA	trt_cp	0.01 uM	24 h	2	282	0.2721	0.280104	0	0	1	1	0	ACAT inhibitor	SOAT1|ACAT1|CES1	-0.393	1.1348	-1.5196
CPC006_SW480_6H:BRD-K23363278-001-01-3:1	BRD-K23363278	CYT-997	SW480	trt_cp	1.11 uM	6 h	2	77	0.14	0.104988	0	0	1	1	0	Tubulin inhibitor	TUBB	-0.393	1.1348	-1.5195
PAC002_U2OS_6H:BRD-K43405658-001-01-8:10	BRD-K43405658	BRD-K43405658	U2OS	trt_cp	10 uM	6 h	2	126	0.2	0.160521	0	0	1	1	0	Protein tyrosine kinase inhibitor	EGFR	-0.3929	1.1348	-1.5194
REP.A004_PC3_24H:H01	BRD-K22024824	RG-4733	PC3	trt_cp	10 uM	24 h	3	92	0.2297	0.146996	1	1	1	1	0	Gamma secretase inhibitor	NOTCH1|PSEN1	-0.3929	1.1348	-1.5194
REP.A027_A375_24H:P01	BRD-K98004573	rupatadine	A375	trt_cp	10 uM	24 h	3	336	0.3996	0.370521	0	0	1	1	0	Histamine receptor antagonist|Platelet activating factor receptor antagonist	HRH1|PTAFR	-0.3929	1.1348	-1.5192
CPC018_SKB_24H:BRD-K37814297-050-05-4:10	BRD-K37814297	acepromazine	SKB	trt_cp	10 uM	24 h	3	71	0.03	0.0466681	0	0	1	1	0	Dopamine receptor antagonist	ADRA1A|ADRA1B|DRD1|DRD2|HTR1A|HTR2A	-0.3929	1.1348	-1.5192
LPROT004_YAPC_6H:BRD-K98203492:5	BRD-K98203492	GSK-J4	YAPC	trt_cp	4 uM	6 h	3	182	0.56	0.32282	1	1	1	1	0	Histone lysine demethylase inhibitor	KDM6A|KDM6B|TNF	-0.3928	1.1348	-1.5189
CVD001_HEPG2_24H:BRD-K13183738-317-06-0:2.5	BRD-K13183738	pentamidine	HEPG2	trt_cp	2.5 uM	24 h	3	407	0.7	0.53973	0	0	1	1	0	Anti-pneumocystis agent	TRDMT1	-0.3928	1.1348	-1.5188
REP.B021_HEK293_24H:A18	BRD-K80343549	TAK-285	HEK293	trt_cp	0.01 uM	24 h	2	85	0.1047	0.0953923	0	0	1	1	0	EGFR inhibitor	ERBB2|EGFR	-0.3926	1.1348	-1.5181
CVD001_PHH_6H:BRD-K55468218-001-16-2:10	BRD-K55468218	spiperone	PHH	trt_cp	10 uM	6 h	3	174	0.27	0.219173	0	0	1	1	0	Dopamine receptor antagonist	DRD2|ADRA1A|DRD3|DRD4|HTR1A|HTR2A|HTR7|ADRA1B|ADRA1D|DRD1|DRD5|HTR1D|HTR2B|HTR2C|HTR6	-0.3926	1.1348	-1.5181
CPC011_VCAP_24H:BRD-K51095933-236-04-9:10	BRD-K51095933	estropipate	VCAP	trt_cp	10 uM	24 h	5	94	0.2	0.138647	1	0	1	1	0	Estrogen receptor agonist	ESR1|ESR2	-0.3926	1.1348	-1.5179
REP.A023_HEK293_24H:O14	BRD-K72951360	valrubicin	HEK293	trt_cp	3.33 uM	24 h	3	489	0.7358	0.606548	1	1	1	1	0	DNA inhibitor|Topoisomerase inhibitor	TOP2A	-0.3925	1.1348	-1.5175
CPC006_H1299_6H:BRD-K11853856-003-01-3:10	BRD-K11853856	PJ-34	H1299	trt_cp	10 uM	6 h	2	69	0.36	0.15937	0	0	1	1	0	PARP inhibitor	EEF2|PARP1|PARP15|PARP3	-0.3924	1.1348	-1.5173
CPC005_A549_6H:BRD-K56403959-300-01-9:10	BRD-K56403959	ZK-756326	A549	trt_cp	10 uM	6 h	3	361	0.41	0.389024	1	1	1	1	0	CC chemokine receptor agonist	CCR8	-0.3924	1.1348	-1.5173
REP.B013_HUVEC.A_24H:O23	BRD-K44309363	dexniguldipine	HUVEC	trt_cp	0.03 uM	24 h	2	497	0.1059	0.231983	0	0	1	1	0	Calmodulin inhibitor	CALM1|PRKCA|ADORA3	-0.3923	1.1348	-1.5168
LJP007_ASC.C_24H:I23	BRD-K76694128	rebastinib	ASC	trt_cp	0.12 uM	24 h	3	200	0.4423	0.300749	1	1	1	1	0	Bcr-Abl inhibitor|TIE tyrosine kinase inhibitor|VEGFR inhibitor	ABL1|BCR|FLT3|FGR|HCK|KDR|LYN|TEK|SRC	-0.3923	1.1348	-1.5168
CPC002_HCC515_6H:BRD-K93658967-001-01-7:10	BRD-K93658967	aloisine	HCC515	trt_cp	10 uM	6 h	3	120	0.26	0.178611	1	1	1	1	0	CDK inhibitor|CFTR channel agonist|GSK inhibitor	CDK2	-0.3923	1.1348	-1.5167
CPC018_PHH_24H:BRD-K68095457-001-04-4:10	BRD-K68095457	palmitoylethanolamide	PHH	trt_cp	10 uM	24 h	3	152	0.17	0.162546	0	0	1	1	0	Cannabinoid receptor agonist	CNR2|GPR119|GPR55	-0.3922	1.1348	-1.5165
CPC020_VCAP_24H:BRD-K36862742-001-21-5:10	BRD-K36862742	hydroflumethiazide	VCAP	trt_cp	10 uM	24 h	5	417	0.39	0.407785	0	0	1	1	0	Sodium channel inhibitor	SLC12A1|ATP1A1|CA1|CA12|CA2|CA4|CA9|KCNMA1|SLC12A3	-0.3922	1.1348	-1.5164
CPC018_ASC_24H:BRD-K14965640-001-03-3:10	BRD-K14965640	BRD-K14965640	ASC	trt_cp	10 uM	24 h	3	165	0.02	0.0580881	0	0	1	1	0	Cyclooxygenase inhibitor	PTGS2|PTGS1|ASIC1|BCL2|CFTR|FABP2|PLAT|PPARG|SLC5A8|THBD	-0.392	1.1348	-1.5159
CPC006_H1299_6H:BRD-A63646118-001-01-8:151.2	BRD-A63646118	fumonisin-b1	H1299	trt_cp	150 uM	6 h	2	49	0.25	0.111918	0	0	1	1	0	Sphingosine kinase inhibitor	CERS1	-0.392	1.1348	-1.5157
PAC003_U2OS_6H:BRD-K35586044-001-02-6:14.1067	BRD-K35586044	yohimbine	U2OS	trt_cp	15 uM	6 h	2	86	0.22	0.139088	1	0	1	1	0	Adrenergic receptor antagonist	ADRA2A|ADRA2C|ADRA2B|HTR1A|HTR1B|HTR1D|HTR2B|DRD2|DRD3|HTR1E|HTR1F|HTR2A|HTR2C|HTR5A|HTR7|KCNJ1|KCNJ10|KCNJ11|KCNJ12|KCNJ14|KCNJ15|KCNJ8	-0.3919	1.1348	-1.5154
REP.A024_HELA_24H:D01	BRD-K74141488	naftifine	HELA	trt_cp	10 uM	24 h	3	159	0.2556	0.203849	1	0	1	1	0	Fungal squalene epoxidase inhibitor	SQLE	-0.3919	1.1348	-1.5153
REP.A008_HELA_24H:N07	BRD-K88025533	fingolimod	HELA	trt_cp	10 uM	24 h	3	306	0.672	0.458539	0	0	1	1	0	Immunosuppressant|Sphingosine 1 phosphate receptor agonist	S1PR1|S1PR5|S1PR3|S1PR4|CYP2E1|CYP4F2|SPHK1	-0.3918	1.1348	-1.5151
REP.A004_A375_24H:B07	BRD-K53097745	pterostilbene	A375	trt_cp	10 uM	24 h	3	209	0.4278	0.30236	1	1	1	1	0	Cyclooxygenase inhibitor|PPAR receptor agonist	PTGS2|FAAH|PPARA|PTGS1	-0.3919	1.1348	-1.5151
CPC017_MCF7_6H:BRD-K67860401-001-01-5:10	BRD-K67860401	AR-A014418	MCF7	trt_cp	10 uM	6 h	4	135	0.23	0.178181	1	1	1	1	0	GSK inhibitor	GSK3B	-0.3918	1.1346	-1.5148
CPC003_HA1E_6H:BRD-K76805682-001-05-0:10	BRD-K76805682	SB-415286	HA1E	trt_cp	10 uM	6 h	2	51	0.28	0.120836	1	1	1	1	0	GSK inhibitor	GSK3B|GSK3A|RPS6KB1	-0.3917	1.1345	-1.5147
CPC005_A375_24H:BRD-K69023402-001-02-5:10	BRD-K69023402	thapsigargin	A375	trt_cp	10 uM	24 h	3	619	0.82	0.720415	1	1	1	1	0	ATPase inhibitor	ATP2A1	-0.3917	1.1345	-1.5147
CPC015_ASC_24H:BRD-A65449987-001-06-2:10	BRD-A65449987	flunisolide	ASC	trt_cp	10 uM	24 h	4	172	0.17	0.17291	0	0	1	1	0	Cytochrome P450 inhibitor	NR3C1	-0.3917	1.1339	-1.5144
REP.A014_HT29_24H:D24	BRD-A57382968	piroxicam	HT29	trt_cp	0.04 uM	24 h	3	197	0.3596	0.269137	1	1	1	1	0	Cyclooxygenase inhibitor	PTGS2|PTGS1	-0.3916	1.1336	-1.5143
ERG020_VCAP_24H:BRD-K26573499:10	BRD-K26573499	DMAB-anabaseine	VCAP	trt_cp	10 uM	24 h	3	110	0.18	0.142286	1	1	1	1	0	Adrenergic receptor agonist	CHRNA7	-0.3916	1.1336	-1.5143
CPC017_PHH_24H:BRD-K43330982-001-01-5:10	BRD-K43330982	JTE-013	PHH	trt_cp	10 uM	24 h	3	103	0.12	0.112419	0	0	1	1	0	Lysophospholipid receptor antagonist	S1PR2|P2RY10	-0.3916	1.1338	-1.5143
CPC006_HCC515_24H:A15	BRD-K06792661	narciclasine	HCC515	trt_cp	10 uM	24 h	5	729	0.8051	0.774674	1	1	1	1	0	LIM kinase activator|Rho associated kinase activator	RHOA	-0.3916	1.132	-1.5141
CPC006_NCIH2073_6H:BRD-K76703230-001-01-3:0.31	BRD-K76703230	YM-155	NCIH2073	trt_cp	0.3 uM	6 h	2	228	0.44	0.320276	0	0	1	1	0	Survivin inhibitor	BIRC5	-0.3915	1.1288	-1.5138
MOAR005_PC3_24H:C22	BRD-K18319422	CPI-360	PC3	trt_cp	10 uM	24 h	3	88	0.28	0.158727	1	1	1	1	0	Histone lysine methyltransferase inhibitor	EZH2	-0.3915	1.1289	-1.5138
CPC013_ASC_24H:BRD-K11636097-001-01-5:10	BRD-K11636097	JNJ-7706621	ASC	trt_cp	10 uM	24 h	4	685	0.71	0.705188	0	0	1	1	0	CDK inhibitor	CDK1|CDK2|AURKA|AURKB	-0.3915	1.1284	-1.5137
REP.A025_HT29_24H:N24	BRD-K79102359	idalopirdine	HT29	trt_cp	0.04 uM	24 h	3	120	0.1523	0.136701	1	0	1	1	0	Serotonin receptor antagonist	HTR6	-0.3914	1.1272	-1.5135
CPC006_NCIH2073_6H:BRD-A58955223-001-01-2:10	BRD-A58955223	sulforaphane	NCIH2073	trt_cp	10 uM	6 h	2	141	0.05	0.0849034	0	0	1	1	0	Carcinogen|Aryl hydrocarbon receptor antagonist	NFE2L2	-0.3913	1.1268	-1.5131
CPC003_HCC515_24H:BRD-K35629949-001-01-2:10	BRD-K35629949	SR-27897	HCC515	trt_cp	10 uM	24 h	3	103	0.24	0.158985	1	1	1	1	0	CCK receptor antagonist	CCKAR	-0.3913	1.1268	-1.5131
REP.A026_A375_24H:K19	BRD-K92049597	triamterene	A375	trt_cp	10 uM	24 h	3	505	0.5905	0.552187	0	0	1	1	0	Sodium channel inhibitor	SCNN1A|SCNN1B|SCNN1G|SCNN1D	-0.3913	1.1268	-1.513
REP.B024_HA1E_24H:J01	BRD-K76775527	nimesulide	HA1E	trt_cp	2.22 uM	24 h	2	58	0.0968	0.0757674	1	1	1	1	0	Cyclooxygenase inhibitor	PTGS2|LTF|PLA2G2E|PTGS1	-0.3912	1.1268	-1.5128
LJP005_MCF10A_3H:C13	BRD-K56343971	vemurafenib	MCF10A	trt_cp	10 uM	3 h	2	128	0.4371	0.239181	1	1	1	1	0	RAF inhibitor	BRAF|CYP2C19|CYP3A4|CYP3A5|RAF1	-0.3912	1.1268	-1.5125
CPC018_A549_24H:BRD-K00675675-003-01-2:10	BRD-K00675675	CL-82198	A549	trt_cp	10 uM	24 h	2	127	0.1	0.113955	0	0	1	1	0	Metalloproteinase inhibitor	MMP13	-0.3911	1.1268	-1.5123
REP.B013_HELA_24H:A17	BRD-K37385792	conivaptan	HELA	trt_cp	0.03 uM	24 h	2	181	0.4958	0.302917	0	0	1	1	0	Vasopressin receptor antagonist	AVPR1A|AVPR2|OXT|OXTR	-0.3911	1.1268	-1.5123
CPC006_A375_24H:BRD-K28907958-001-02-7:11.1	BRD-K28907958	CD-437	A375	trt_cp	12 uM	24 h	4	722	0.81	0.773289	1	1	1	1	0	Retinoid receptor agonist	RARG	-0.3911	1.1268	-1.5123
CPC016_A375_6H:BRD-K92492521-001-01-1:10	BRD-K92492521	LY-255283	A375	trt_cp	10 uM	6 h	4	211	0.18	0.197064	0	0	1	1	0	Leukotriene receptor antagonist	LTB4R|LTB4R2	-0.391	1.1266	-1.512
LJP007_HELA_24H:B11	BRD-K22096725	ALW-II-49-7	HELA	trt_cp	0.12 uM	24 h	3	211	0.3589	0.278265	1	0	1	1	0	Ephrin inhibitor	DDR1	-0.391	1.1266	-1.5119
CPC017_PHH_24H:BRD-K11927976-050-01-1:10	BRD-K11927976	ER-27319	PHH	trt_cp	10 uM	24 h	3	473	0.68	0.573476	0	0	1	1	0	Syk inhibitor	SYK	-0.391	1.1266	-1.5118
CEGS001_NPC.179_24H:F24	BRD-A53077924	tianeptine	NPC	trt_cp	8 uM	24 h	3	114	0.38	0.210463	1	1	1	1	0	Selective serotonin reuptake inhibitor (SSRI)	SLC6A4|OPRD1|OPRK1|OPRM1	-0.3909	1.1246	-1.5114
REP.B009_MCF10A_24H:H02	BRD-K30685142	levothyroxine	MCF10A	trt_cp	0.74 uM	24 h	2	79	0.3672	0.172225	1	1	1	1	0	Thyroid hormone stimulant	THRA|THRB	-0.3908	1.1119	-1.5111
CPC016_ASC_24H:BRD-A35588707-001-03-0:10	BRD-A35588707	teniposide	ASC	trt_cp	10 uM	24 h	3	399	0.4	0.403968	0	0	1	1	0	Topoisomerase inhibitor	TOP2A|CYP3A5|TOP2B	-0.3908	1.1119	-1.5111
LJP007_ASC.C_24H:L05	BRD-K37720887	SB-525334	ASC	trt_cp	0.12 uM	24 h	3	95	0.2467	0.154802	1	1	1	1	0	TGF-beta receptor inhibitor	TGFBR1	-0.3907	1.1089	-1.5105
CPC015_SKB_24H:BRD-K22503835-001-06-0:10	BRD-K22503835	scriptaid	SKB	trt_cp	10 uM	24 h	2	346	0.54	0.437085	0	0	1	1	0	HDAC inhibitor	HDAC1|HDAC2|HDAC3|HDAC4|HDAC5|HDAC6|HDAC7|HDAC8|HDAC9	-0.3906	1.1089	-1.5102
CPC006_NCIH2073_6H:BRD-K12502280-001-01-5:11.1	BRD-K12502280	TG-101348	NCIH2073	trt_cp	12 uM	6 h	2	303	0.54	0.409024	0	0	1	1	0	JAK inhibitor|FLT3 inhibitor	JAK2|FLT3|RET|BRD4|JAK1|JAK3|TYK2	-0.3905	1.1089	-1.5101
PAC001_U2OS_6H:BRD-K62353524-001-01-8:10	BRD-K62353524	DY-131	U2OS	trt_cp	10 uM	6 h	2	56	0.21	0.109656	0	0	1	1	0	Estrogen receptor agonist	ESRRG|ESRRB|ESR2	-0.3905	1.1089	-1.51
CPC012_ASC_24H:BRD-K74761218-001-03-5:10	BRD-K74761218	WT-171	ASC	trt_cp	10 uM	24 h	4	270	0.34	0.306374	1	1	1	1	0	HDAC inhibitor	HDAC6	-0.3905	1.1089	-1.51
REP.A028_HT29_24H:C16	BRD-K92984783	melperone	HT29	trt_cp	0.37 uM	24 h	2	101	0.1984	0.14314	0	0	1	1	0	Dopamine receptor antagonist|Serotonin receptor antagonist	DRD2|HTR1A|HTR2A	-0.3904	1.1081	-1.5095
CPC016_ASC_24H:BRD-K82731415-001-05-4:10	BRD-K82731415	olomoucine	ASC	trt_cp	10 uM	24 h	2	149	0.2	0.174558	0	0	1	1	0	CDK inhibitor	CDK1|CDK2|CDK5|MAPK1	-0.3904	1.1069	-1.5094
CPC016_SKB_24H:BRD-K25875056-001-01-2:10	BRD-K25875056	SC-9	SKB	trt_cp	10 uM	24 h	3	88	0.17	0.123679	1	0	1	1	0	Protein synthesis stimulant	PRKCA	-0.3903	1.1	-1.509
CPC018_ASC_24H:BRD-K34092021-001-02-3:10	BRD-K34092021	arvanil	ASC	trt_cp	10 uM	24 h	3	97	0.07	0.0833231	1	0	1	1	0	TRPV agonist	TRPV1|CNR1	-0.3902	1.0974	-1.5088
REP.A004_HEK293_24H:P08	BRD-A26423207	sparfloxacin	HEK293	trt_cp	3.33 uM	24 h	3	201	0.4102	0.290353	0	0	1	1	0	Bacterial DNA Gyrase inhibitor	TOP2A	-0.3902	1.0981	-1.5088
REP.A028_PC3_24H:M13	BRD-K96862998	pirfenidone	PC3	trt_cp	10 uM	24 h	2	133	0.1371	0.136545	0	0	1	1	0	TGF-beta receptor inhibitor	TNF|MAPK14|TNFRSF1A|FURIN	-0.3902	1.0961	-1.5087
REP.A015_HA1E_24H:C07	BRD-K56291712	voxtalisib	HA1E	trt_cp	10 uM	24 h	3	535	0.6904	0.614551	1	1	1	1	0	MTOR inhibitor|PI3K inhibitor	MTOR|PIK3CA	-0.3902	1.0963	-1.5087
REP.A018_MDAMB231_24H:D01	BRD-K62562723	SR-2640	MDAMB231	trt_cp	10 uM	24 h	3	184	0.291	0.233984	0	0	1	1	0	Leukotriene receptor antagonist	CYSLTR1	-0.3902	1.0948	-1.5086
REP.A009_YAPC_24H:M20	BRD-A33692381	zidovudine	YAPC	trt_cp	3.33 uM	24 h	2	102	0.2505	0.161635	0	0	1	1	0	Reverse transcriptase inhibitor	TERT	-0.3901	1.0935	-1.5085
CPD001_PC3_24H:BRD-K15014948-001-07-9:10	BRD-K15014948	tranexamic-acid	PC3	trt_cp	10 uM	24 h	3	340	0.06	0.144426	1	0	1	1	0	Fibrinogen stimulant|Plasminogen activator inhibitor	PLG|FGA|FGB|FGG|PLAT	-0.3901	1.0917	-1.5083
CPC007_HT29_24H:BRD-K27074404-001-06-8:10	BRD-K27074404	VU-0240551	HT29	trt_cp	10 uM	24 h	3	94	0.15	0.120072	1	1	1	1	0	Solute carrier family member inhibitor	SLC12A5	-0.39	1.0908	-1.5082
REP.B020_A549_24H:M24	BRD-K48578705	methyldopa	A549	trt_cp	0.01 uM	24 h	2	155	0.2952	0.216299	0	0	1	1	0	Adrenergic receptor agonist	ADRA2A|DDC|ADRA2B|ADRA2C	-0.3901	1.091	-1.5082
LJP008_THP1_24H:O20	BRD-K09537769	NU-7026	THP1	trt_cp	3.33 uM	24 h	3	38	0.1365	0.0728264	1	0	1	1	0	DNA inhibitor|MTOR inhibitor|PI3K inhibitor	PRKDC	-0.39	1.0904	-1.5081
REP.A026_HT29_24H:B12	BRD-A87435144	AZD-7545	HT29	trt_cp	0.04 uM	24 h	3	165	0.2079	0.187284	0	0	1	1	0	PDK inhibitor	PDK2|PDK1	-0.39	1.0905	-1.5081
CPC006_NOMO1_6H:BRD-A67788537-001-01-7:120	BRD-A67788537	salermide	NOMO1	trt_cp	125 uM	6 h	2	206	0.58	0.349525	1	1	1	1	0	SIRT inhibitor	SIRT1|SIRT2	-0.39	1.0905	-1.5081
CPC015_ASC_24H:BRD-A68930007-001-03-1:10	BRD-A68930007	ouabain	ASC	trt_cp	10 uM	24 h	4	566	0.68	0.627326	0	0	1	1	0	Na/K-ATPase inhibitor	ATP1A1|ATP1A2|ATP1A3|ATP1A4|ATP1B1|ATP1B2|ATP1B3|ATP1B4|FXYD2	-0.39	1.09	-1.5079
PCL001_HT29_24H:BRD-K19796430:0.12	BRD-K19796430	sonidegib	HT29	trt_cp	0.12 uM	24 h	3	146	0.36	0.231824	1	1	1	1	0	Smoothened receptor antagonist	SMO	-0.39	1.09	-1.5078
CPC004_A375_6H:BRD-K43290182-001-01-9:10	BRD-K43290182	Ro-04-6790	A375	trt_cp	10 uM	6 h	3	113	0.08	0.0961424	1	0	1	1	0	Serotonin receptor antagonist	HTR6	-0.3899	1.0899	-1.5077
CPC015_NPC_24H:BRD-K15933101-001-01-6:10	BRD-K15933101	ropinirole	NPC	trt_cp	10 uM	24 h	3	154	0.14	0.148476	1	0	1	1	0	Dopamine receptor agonist	DRD2|DRD3|ADRA2A|ADRA2B|ADRA2C|DRD1|DRD4|DRD5|HTR1A|HTR1B|HTR1D|HTR2A|HTR2B|HTR2C	-0.3899	1.0899	-1.5077
REP.B025_MCF7_24H:N09	BRD-A78195072	imexon	MCF7	trt_cp	0.25 uM	24 h	2	181	0.1482	0.165613	0	0	1	1	0	Apoptosis stimulant|Ribonucleoside reductase inhibitor	RRM1|RRM2	-0.3899	1.0899	-1.5075
AICHI001_K562_24H:B24	BRD-K12343256	trametinib	K562	trt_cp	0.01 uM	24 h	3	110	0.29	0.180603	1	1	1	1	0	MEK inhibitor	MAP2K1|MAP2K2|CYP2C8|CYP3A4	-0.3898	1.0898	-1.5074
REP.A021_THP1_24H:P24	BRD-K86882815	cabergoline	THP1	trt_cp	0.04 uM	24 h	3	195	0.145	0.170032	0	0	1	1	0	Dopamine receptor agonist	DRD2|ADRA1A|ADRA2A|ADRA2B|ADRA2C|DRD1|DRD3|DRD4|DRD5|HTR1A|HTR1B|HTR1D|HTR2A|HTR2B|HTR2C|PRL|ADRA1B|ADRA1D|ADRB1|ADRB2|HTR7	-0.3898	1.0898	-1.5073
CPC004_VCAP_6H:BRD-A54487287-001-03-9:10	BRD-A54487287	cortisone-acetate	VCAP	trt_cp	10 uM	6 h	4	93	0.09	0.092511	1	0	1	1	0	Glucocorticoid receptor agonist	NR3C1	-0.3896	1.0822	-1.5066
LJP008_SKL_24H:G19	BRD-K03406345	azacitidine	SKL	trt_cp	10 uM	24 h	3	474	0.7017	0.58317	1	1	1	1	0	DNA inhibitor	DNMT1|DNMT3A	-0.3896	1.0824	-1.5066
CPC020_A549_6H:BRD-K86301799-001-30-6:10	BRD-K86301799	dipyridamole	A549	trt_cp	10 uM	6 h	2	185	0.23	0.208584	0	0	1	1	0	Phosphodiesterase inhibitor	PDE5A|ADA|PDE10A|PDE4A|PDE7B|PDE8A|PDE8B|SLC29A1|PDE1A|PDE1B|PDE1C|PDE2A|PDE3A|PDE3B|PDE4B|PDE4C|PDE4D|PDE6A|PDE6B|PDE6C|PDE6D|PDE6G|PDE6H|PDE7A|PDE9A	-0.3896	1.0837	-1.5066
MOAR002_A375_24H:N16	BRD-K05444225	E-7449	A375	trt_cp	10 uM	24 h	3	504	0.67	0.587602	1	1	1	1	0	PARP inhibitor	PARP1|PARP2|TNKS|TNKS2	-0.3896	1.0856	-1.5066
REP.B013_HUVEC.A_24H:M19	BRD-K43457670	acetazolamide	HUVEC	trt_cp	2.22 uM	24 h	2	152	0.0124	0.0438999	0	0	1	1	0	Carbonic anhydrase inhibitor	CA14|CA2|CA1|CA4|CA12|CA7|CA13|CA6|AQP1|CA3	-0.3896	1.0771	-1.5064
REP.B018_HELA_24H:O19	BRD-A67479912	progesterone	HELA	trt_cp	2.22 uM	24 h	2	286	0.591	0.415726	1	1	1	1	0	Progesterone receptor agonist	PGR|CYP17A1|NR3C2|CYP2C19|CATSPER1|CATSPER2|CATSPER3|CATSPER4|ESR1|OPRK1|TRPC5	-0.3895	1.0766	-1.5059
PAC003_U2OS_6H:BRD-K24023109-001-02-5:12.0622	BRD-K24023109	diltiazem	U2OS	trt_cp	12 uM	6 h	2	81	0.1	0.0910066	1	0	1	1	0	Calcium channel blocker	CACNA1C|CYP3A5|CYP3A7|CACNA1S|CACNA2D1|CACNG1|HTR3A|KCNA5	-0.3894	1.0766	-1.5057
CPC006_NOMO1_6H:BRD-K02113016-001-01-4:44.4	BRD-K02113016	olaparib	NOMO1	trt_cp	40 uM	6 h	2	142	0.2	0.170408	1	1	1	1	0	PARP inhibitor	PARP1|PARP2|PARP3	-0.3894	1.0766	-1.5056
REP.B027_PC3_24H:E17	BRD-K94436377	diosmin	PC3	trt_cp	0.03 uM	24 h	2	83	0.2037	0.131482	1	1	1	1	0	Aryl hydrocarbon receptor agonist|Capillary stabilizing agent	AHR	-0.3894	1.0766	-1.5056
REP.B028_HT29_24H:P18	BRD-K97472745	gestrinone	HT29	trt_cp	0.01 uM	24 h	2	140	0.3159	0.212652	1	1	1	1	0	Progesterone receptor antagonist	PGR|AR|ESR1	-0.3894	1.0766	-1.5055
REP.B025_HT29_24H:K04	BRD-K76210423	resiquimod	HT29	trt_cp	0.08 uM	24 h	2	235	0.3751	0.300219	1	1	1	1	0	TLR agonist	TLR7|TLR8	-0.3894	1.0766	-1.5055
AICHI001_OCILY10_24H:N07	BRD-K74514084	pazopanib	OCILY10	trt_cp	10 uM	24 h	2	35	0.3086	0.10509	0	0	1	1	0	VEGFR inhibitor|KIT inhibitor|PDGFR inhibitor	KDR|KIT|FLT1|FLT4|PDGFRB|PDGFRA|BRAF|CYP2B6|CYP2C8|CYP2E1|DDR2|CSF1R|FGF1|FGFR1|FGFR3|ITK|SH2B3	-0.3892	1.0766	-1.505
PAC003_U2OS_6H:BRD-K25906698-303-01-9:10	BRD-K25906698	immepip	U2OS	trt_cp	10 uM	6 h	2	145	0.39	0.240462	1	0	1	1	0	Histamine receptor agonist	HRH3|HRH4	-0.3892	1.0766	-1.5049
CPC017_ASC_24H:BRD-A27143604-001-01-2:10	BRD-A27143604	dpn	ASC	trt_cp	10 uM	24 h	4	111	0.12	0.116703	1	0	1	1	0	Estrogen receptor agonist	ESR2	-0.3892	1.0766	-1.5048
CPC016_NEU_24H:BRD-K56047318-001-03-0:10	BRD-K56047318	RHC-80267	NEU	trt_cp	10 uM	24 h	3	488	0.14	0.264304	0	0	1	1	0	Triacylglycerol lipase inhibitor	LIPC|LIPE|LIPG|DAGLA|DAGLB	-0.3891	1.0765	-1.5046
CPC017_HEPG2_6H:BRD-K90524085-001-06-0:10	BRD-K90524085	MY-5445	HEPG2	trt_cp	10 uM	6 h	3	126	0.23	0.172139	1	1	1	1	0	Phosphodiesterase inhibitor|Platelet aggregation inhibitor	PDE5A	-0.3891	1.0763	-1.5044
ASG003_MCF7_6H:M12	BRD-A11990600	lorazepam	MCF7	trt_cp	0.12 uM	6 h	5	60	0.1879	0.107367	1	1	1	1	0	Benzodiazepine receptor agonist	GABRA1|GABRA2|GABRA3|GABRA5|GABRA4|GABRA6|GABRB1|GABRB2|GABRB3|GABRD|GABRE|GABRG1|GABRG2|GABRG3|GABRP|GABRQ|TSPO	-0.389	1.076	-1.5043
REP.B017_MCF7_24H:E24	BRD-A62879835	rifaximin	MCF7	trt_cp	0.01 uM	24 h	2	71	0.0653	0.068852	1	0	1	1	0	RNA synthesis inhibitor	NR1I2|CYP3A4	-0.389	1.0732	-1.5041
CPC015_A549_24H:BRD-K79366068-236-01-5:10	BRD-K79366068	PSB-069	A549	trt_cp	10 uM	24 h	3	455	0.17	0.281229	0	0	1	1	0	NTPDase inhibitor	ENTPD1|ENTPD2|ENTPD3	-0.3889	1.0677	-1.5037
REP.A018_YAPC_24H:O20	BRD-A67479912	progesterone	YAPC	trt_cp	3.33 uM	24 h	2	61	0.3068	0.138332	0	0	1	1	0	Progesterone receptor agonist	PGR|CYP17A1|NR3C2|CYP2C19|CATSPER1|CATSPER2|CATSPER3|CATSPER4|ESR1|OPRK1|TRPC5	-0.3889	1.0677	-1.5037
CPC018_ASC_24H:BRD-A78322124-003-06-6:10	BRD-A78322124	dobutamine	ASC	trt_cp	10 uM	24 h	3	158	0.33	0.230896	1	0	1	1	0	Adrenergic receptor agonist	ADRB1|ADRB2|ADRA1A	-0.3889	1.0677	-1.5037
REP.A025_A549_24H:G01	BRD-K91822704	torcitabine	A549	trt_cp	10 uM	24 h	2	77	0.1333	0.102445	0	0	1	1	0	DNA inhibitor	DCK|TK2	-0.3887	1.0677	-1.5028
CPC006_H1299_6H:BRD-K15409150-001-02-5:30	BRD-K15409150	penfluridol	H1299	trt_cp	30 uM	6 h	2	289	0.51	0.388208	0	0	1	1	0	Calcium channel blocker	DRD1|DRD2|CACNA1G	-0.3886	1.0677	-1.5027
REP.A023_HT29_24H:N20	BRD-K72166146	BRD-K72166146	HT29	trt_cp	3.33 uM	24 h	3	118	0.2839	0.185078	1	0	1	1	0	Serotonin receptor agonist	HTR1D|HTR1B|ADRA2A|DRD2|HTR1E|HTR1F|HTR2B|HTR7	-0.3886	1.0677	-1.5025
REP.A005_YAPC_24H:J01	BRD-A09533288	verapamil	YAPC	trt_cp	10 uM	24 h	3	196	0.2351	0.217063	0	0	1	1	0	Calcium channel blocker	CACNA1C|CACNA1D|CACNA1G|CACNA1S|CYP2C8|CYP2E1|CYP3A5|CYP3A7|DRD2|CACNA1A|CACNA1B|CACNA1F|CACNA1I|CACNB1|CACNB2|CACNB3|CACNB4|CYP3A4|KCNA10|KCNA7|KCNH2|KCNJ11|NALCN|SCN5A|SLC29A4|SLC6A4	-0.3885	1.0677	-1.502
LKCP002_U2OS_24H:G19	BRD-K62734952	arglabin	U2OS	trt_cp	10 uM	24 h	5	261	0.4846	0.359619	1	1	1	1	0	Farnesyltransferase inhibitor	FNTA|NFKB1	-0.3884	1.0677	-1.5016
LJP007_CD34_24H:O19	BRD-K31313613	BS-181	CD34	trt_cp	10 uM	24 h	3	665	0.7567	0.717304	0	0	1	1	0	CDK inhibitor	CDK7	-0.3883	1.0677	-1.5015
CPC018_SKB_24H:BRD-A53576514-048-06-9:10	BRD-A53576514	orphenadrine	SKB	trt_cp	10 uM	24 h	3	117	0.2	0.154682	1	0	1	1	0	Acetylcholine receptor antagonist	CYP2B6|GRIN1|GRIN2D|GRIN3A|GRIN3B|HRH1|SCN10A|SLC6A2	-0.3883	1.0677	-1.5014
CPC018_PHH_24H:BRD-K13169950-001-04-5:10	BRD-K13169950	NSC-3852	PHH	trt_cp	10 uM	24 h	3	156	0.12	0.138351	0	0	1	1	0	HDAC inhibitor	HDAC1	-0.3882	1.0677	-1.5012
REP.A005_HA1E_24H:A13	BRD-A07986123	galeterone	HA1E	trt_cp	10 uM	24 h	3	177	0.4909	0.298067	1	1	1	1	0	Androgen receptor antagonist	AR|CYP17A1	-0.3882	1.0677	-1.501
CPC004_HCC515_24H:BRD-A02006392-001-09-9:10	BRD-A02006392	nitrendipine	HCC515	trt_cp	10 uM	24 h	3	85	0.21	0.135098	1	1	1	1	0	Calcium channel blocker	CACNA1C|CACNA1D|CACNA2D1|CACNA1H|CACNA1S|CACNA2D2|CACNB2|CACNG1|KCNN4	-0.388	1.0677	-1.5004
REP.B009_YAPC_24H:B11	BRD-K26823213	GW-842166	YAPC	trt_cp	0.03 uM	24 h	2	477	0.5442	0.515192	0	0	1	1	0	Cannabinoid receptor agonist	CNR2	-0.388	1.0677	-1.5002
REP.A025_YAPC_24H:N07	BRD-A78195072	imexon	YAPC	trt_cp	10 uM	24 h	3	71	0.1699	0.11106	1	0	1	1	0	Apoptosis stimulant|Ribonucleoside reductase inhibitor	RRM1|RRM2	-0.388	1.0677	-1.5001
CPC009_HEPG2_6H:BRD-K27721098-001-07-3:10	BRD-K27721098	clopidogrel	HEPG2	trt_cp	10 uM	6 h	3	309	0.45	0.377065	1	1	1	1	0	Purinergic receptor antagonist	P2RY12|CYP2B6|CYP2C19|CYP3A5	-0.3879	1.0677	-1.4998
REP.A013_HELA_24H:N20	BRD-K43578482	defactinib	HELA	trt_cp	3.33 uM	24 h	3	279	0.513	0.382553	0	0	1	1	0	Focal adhesion kinase inhibitor	PTK2	-0.3879	1.0677	-1.4997
CPC006_HEPG2_6H:BRD-K64642496-001-01-6:40	BRD-K64642496	KO-143	HEPG2	trt_cp	40 uM	6 h	2	342	0.54	0.434551	0	0	1	1	0	Breast cancer resistance protein inhibitor	ABCG2|ABCB1|ABCC1	-0.3878	1.0677	-1.4996
CPC005_A549_6H:BRD-A60197193-001-05-4:10	BRD-A60197193	amisulpride	A549	trt_cp	10 uM	6 h	3	240	0.19	0.21593	1	0	1	1	0	Dopamine receptor antagonist	DRD2|DRD3|HTR2A|HTR7	-0.3878	1.0677	-1.4993
REP.A018_A375_24H:D01	BRD-K62562723	SR-2640	A375	trt_cp	10 uM	24 h	3	305	0.5539	0.41562	0	0	1	1	0	Leukotriene receptor antagonist	CYSLTR1	-0.3876	1.0677	-1.4988
REP.B024_A549_24H:P18	BRD-K79602928	metformin	A549	trt_cp	0.01 uM	24 h	2	137	0.025	0.0591781	1	1	1	1	0	Insulin sensitizer	INS|ACACB|PRKAB1	-0.3876	1.0677	-1.4987
CPC010_HT29_6H:BRD-K28143534-003-20-0:10	BRD-K28143534	cyproheptadine	HT29	trt_cp	10 uM	6 h	5	453	0.57	0.513827	1	1	1	1	0	Histamine receptor antagonist	HRH1|HTR2B|ADRA1A|ADRA1B|ADRA1D|CHRM1|CHRM2|CHRM3|HTR2A|HTR2C|HTR6|HTR7	-0.3876	1.0677	-1.4986
CPC005_A375_24H:BRD-A67479912-001-02-6:10	BRD-A67479912	progesterone	A375	trt_cp	10 uM	24 h	3	138	0.25	0.187819	1	1	1	1	0	Progesterone receptor agonist	PGR|CYP17A1|NR3C2|CYP2C19|CATSPER1|CATSPER2|CATSPER3|CATSPER4|ESR1|OPRK1|TRPC5	-0.3876	1.0677	-1.4986
CPC014_SKB_24H:BRD-A80775386-001-01-9:10	BRD-A80775386	hyperforin	SKB	trt_cp	10 uM	24 h	4	199	0.39	0.281702	0	0	1	1	0	Cyclooxygenase inhibitor|Dopamine uptake inhibitor|Interleukin inhibitor|Lipoxygenase inhibitor|Serotonin reuptake inhibitor	NR1I2|ALOX5|PTGS1	-0.3875	1.0677	-1.4984
REP.B008_THP1_24H:M17	BRD-K88052444	urea	THP1	trt_cp	0.03 uM	24 h	2	116	0.2219	0.162233	1	0	1	1	0	Hydroxy radical formation stimulant	ARG1|CA2|CTNNB1	-0.3875	1.0677	-1.4983
PAC004_U2OS_6H:BRD-K13261168-001-01-4:10	BRD-K13261168	LY-16350	U2OS	trt_cp	10 uM	6 h	2	25	0.02	0.0226108	1	0	1	1	0	Dopamine receptor agonist	DRD2|DRD3	-0.3875	1.0677	-1.4982
CPC014_SKB_24H:BRD-K64800655-001-01-7:10	BRD-K64800655	PHA-793887	SKB	trt_cp	10 uM	24 h	4	545	0.62	0.587793	0	0	1	1	0	CDK inhibitor	CDK1|CDK2|CDK4|CDK5|CCND1|CCNE1|CDK7|CDK9	-0.3874	1.0677	-1.498
PBIOA018_A549_24H:A13	BRD-A10523515	GSK-429286A	A549	trt_cp	10 uM	24 h	3	172	0.3	0.229697	1	1	1	1	0	Rho associated kinase inhibitor	ROCK1	-0.3874	1.0677	-1.498
LKCP002_MCF7_6H:P01	BRD-K71480163	GDC-0068	MCF7	trt_cp	10 uM	6 h	5	423	0.4892	0.459985	1	1	1	1	0	AKT inhibitor	AKT1|AKT2|AKT3|CYP3A5|PRKG1	-0.3874	1.0677	-1.498
CPC005_A375_24H:BRD-A64933752-001-01-0:10	BRD-A64933752	CV-1808	A375	trt_cp	10 uM	24 h	3	268	0.33	0.300715	1	0	1	1	0	Adenosine receptor agonist	ADORA2A|ADORA2B	-0.3873	1.0677	-1.4976
CPC017_A549_24H:BRD-K60476892-001-02-1:10	BRD-K60476892	YC-1	A549	trt_cp	10 uM	24 h	3	80	0.25	0.143003	1	1	1	1	0	Guanylyl cyclase activator	HIF1A|GUCY1A2|GUCY1A3|GUCY1B3	-0.3873	1.0677	-1.4974
PAC005_U2OS_6H:BRD-A62525898-001-02-9:10	BRD-A62525898	prednisone	U2OS	trt_cp	10 uM	6 h	2	91	0.34	0.177865	1	0	1	1	0	Glucocorticoid receptor agonist	NR3C1|HSD11B1	-0.3872	1.0677	-1.4973
LPROT001_PC3_6H:BRD-K87124298:2	BRD-K87124298	OSI-027	PC3	trt_cp	2.22 uM	6 h	3	224	0.44	0.317454	1	1	1	1	0	MTOR inhibitor	MTOR	-0.3872	1.0677	-1.4972
CPC007_MCF7_24H:BRD-K43149758-001-13-6:10	BRD-K43149758	myricetin	MCF7	trt_cp	10 uM	24 h	5	408	0.34	0.376617	1	0	1	1	0	Androgen receptor agonist|Cytochrome P450 inhibitor	PIK3CG|AR|CYP3A4	-0.3872	1.0677	-1.4971
CPC020_A375_6H:BRD-A79803969-003-13-8:10	BRD-A79803969	memantine	A375	trt_cp	10 uM	6 h	5	145	0.12	0.133384	1	0	1	1	0	Glutamate receptor antagonist	GRIN1|CYP2E1|CHRFAM7A|DRD2|GRIN2A|GRIN2B|GRIN3A|HTR3A	-0.3872	1.0677	-1.497
CPC004_HA1E_6H:BRD-A29082194-001-02-4:10	BRD-A29082194	gitoxigenin	HA1E	trt_cp	10 uM	6 h	3	221	0.51	0.339478	1	1	1	1	0	Na/K-ATPase inhibitor	ATP1A1	-0.3872	1.0677	-1.497
PBIOA015_A375_24H:N08	BRD-K13044802	ciclopirox	A375	trt_cp	3.33 uM	24 h	2	264	0.47	0.35619	1	1	1	1	0	Membrane integrity inhibitor	ATP1A1	-0.3871	1.0677	-1.4969
CPC018_MCF7_24H:BRD-K01648091-001-01-8:10	BRD-K01648091	LE-300	MCF7	trt_cp	10 uM	24 h	4	155	0.21	0.182434	1	1	1	1	0	Dopamine receptor antagonist	DRD5	-0.3871	1.0677	-1.4967
REP.B019_HT29_24H:K17	BRD-K49215523	GSK-2636771	HT29	trt_cp	0.03 uM	24 h	2	113	0.2647	0.174883	1	1	1	1	0	PI3K inhibitor	PIK3CB	-0.387	1.0677	-1.4963
REP.B016_THP1_24H:I07	BRD-K53963539	vortioxetine	THP1	trt_cp	2.22 uM	24 h	2	62	0.1273	0.089834	1	1	1	1	0	Serotonin receptor agonist|Serotonin receptor antagonist	HTR1A|HTR1B|HTR7|SLC6A4|HTR1D|CYP2B6|CYP2C19|CYP2C8|CYP3A5|HTR2A|HTR2C|HTR3A|HTR5A|HTR6	-0.3869	1.0677	-1.4961
CPC017_ASC_24H:BRD-K07325606-001-02-3:10	BRD-K07325606	hispidin	ASC	trt_cp	10 uM	24 h	4	289	0.27	0.282463	1	0	1	1	0	PKC inhibitor	PRKCB	-0.3868	1.0677	-1.4958
CPC016_A549_24H:BRD-K91290917-336-03-8:10	BRD-K91290917	amodiaquine	A549	trt_cp	10 uM	24 h	2	501	0.62	0.563567	0	0	1	1	0	Histamine receptor agonist	HNMT|CYP2C8	-0.3868	1.0677	-1.4958
CPC015_SKB_24H:BRD-K71103788-003-04-7:10	BRD-K71103788	duloxetine	SKB	trt_cp	10 uM	24 h	2	68	0.12	0.0913431	0	0	1	1	0	Norepinephrine inhibitor|Serotonin reuptake inhibitor	SLC6A2|SLC6A4|SLC6A3|HTR2A|HTR2C|HTR6	-0.3868	1.0677	-1.4958
CPC018_SKB_24H:BRD-K25433859-003-14-8:10	BRD-K25433859	maprotiline	SKB	trt_cp	10 uM	24 h	3	147	0.46	0.262947	0	0	1	1	0	Norepinephrine inhibitor|Tricyclic antidepressant	SLC6A2|ADRA1A|ADRA1B|ADRA1D|ADRA2A|ADRA2B|ADRA2C|CHRM1|CHRM2|CHRM3|CHRM4|CHRM5|DRD2|HRH1|HTR2A|HTR2C|HTR7	-0.3869	1.0677	-1.4958
CPC017_NPC_24H:BRD-K15791587-003-01-7:10	BRD-K15791587	L-733060	NPC	trt_cp	10 uM	24 h	4	448	0.46	0.459038	0	0	1	1	0	Tachykinin antagonist	TACR1	-0.3868	1.0677	-1.4955
CPC006_VCAP_6H:BRD-K17349619-003-01-4:10	BRD-K17349619	HLI-373	VCAP	trt_cp	10 uM	6 h	4	296	0.45	0.369048	1	1	1	1	0	MDM inhibitor	MDM2	-0.3867	1.0677	-1.4954
CPC006_HCT116_6H:BRD-K00615600-001-06-1:25	BRD-K00615600	AG-14361	HCT116	trt_cp	25 uM	6 h	2	146	0.38	0.238176	1	1	1	1	0	PARP inhibitor	PARP1	-0.3867	1.0677	-1.4953
CPC020_A375_6H:BRD-K47323024-003-17-8:10	BRD-K47323024	methapyrilene	A375	trt_cp	10 uM	6 h	5	106	0.09	0.0987654	1	0	1	1	0	Histamine receptor antagonist	HRH1	-0.3867	1.0677	-1.4953
REP.A027_MCF7_24H:M20	BRD-K99545815	PF-562271	MCF7	trt_cp	3.33 uM	24 h	2	318	0.3358	0.330434	0	0	1	1	0	Focal adhesion kinase inhibitor	PTK2|PTK2B	-0.3867	1.0677	-1.4953
REP.A021_HUVEC.A_24H:L19	BRD-K84892605	IOWH-032	HUVEC	trt_cp	10 uM	24 h	2	300	0.4305	0.363394	0	0	1	1	0	CFTR channel antagonist	CFTR	-0.3867	1.0677	-1.4951
CPD001_MCF7_6H:K21	BRD-K46211610	tolazoline	MCF7	trt_cp	10 uM	6 h	3	117	0.0453	0.0736161	1	0	1	1	0	Adrenergic receptor antagonist	ADRA2A|ADRA2B|ADRA2C|ADRA1A|HRH1|HRH2	-0.3866	1.0677	-1.4949
CPC018_SKB_24H:BRD-K20755323-001-01-8:10	BRD-K20755323	SKI-II	SKB	trt_cp	10 uM	24 h	3	212	0.19	0.202944	0	0	1	1	0	Sphingosine kinase inhibitor	SPHK1|VCP	-0.3866	1.0677	-1.4947
PBIOA018_HT29_24H:B19	BRD-A36318220	necrostatin-1	HT29	trt_cp	10 uM	24 h	3	131	0.1971	0.162484	1	1	1	1	0	RIPK inhibitor	IDO1|KRR1|RIPK1	-0.3865	1.0677	-1.4944
CPC016_MCF7_6H:BRD-K86727142-001-06-6:10	BRD-K86727142	embelin	MCF7	trt_cp	10 uM	6 h	3	109	0.14	0.124913	1	0	1	1	0	HCV inhibitor|XIAP inhibitor	XIAP	-0.3865	1.0677	-1.4944
CPC017_SKB_24H:BRD-K43330982-001-01-5:10	BRD-K43330982	JTE-013	SKB	trt_cp	10 uM	24 h	2	201	0.36	0.272007	0	0	1	1	0	Lysophospholipid receptor antagonist	S1PR2|P2RY10	-0.3864	1.0626	-1.4942
REP.B003_HELA_3H:C07	BRD-K31731454	pemirolast	HELA	trt_cp	2.22 uM	3 h	3	108	0.2092	0.151993	1	0	1	1	0	Mediator release inhibitor	HRH1	-0.3864	1.0626	-1.4941
LJP007_HUVEC_24H:B19	BRD-K49055432	A-66	HUVEC	trt_cp	10 uM	24 h	3	296	0.4702	0.37724	1	1	1	1	0	PI3K inhibitor	PIK3CA	-0.3864	1.0626	-1.4941
MOAR003_PC3_24H:B17	BRD-K19859123	CCMI	PC3	trt_cp	3.33 uM	24 h	2	53	0.1111	0.0775935	1	1	1	1	0	Acetylcholine receptor allosteric modulator	CHRNA7	-0.3864	1.0626	-1.494
REP.B021_HT29_24H:N07	BRD-K85406984	sobetirome	HT29	trt_cp	2.22 uM	24 h	2	59	0.1447	0.093431	1	1	1	1	0	Thyroid hormone inhibitor	THRB|THRA	-0.3862	1.0626	-1.4935
LJP008_A549_24H:O24	BRD-K09537769	NU-7026	A549	trt_cp	0.04 uM	24 h	2	78	0.2975	0.154036	1	0	1	1	0	DNA inhibitor|MTOR inhibitor|PI3K inhibitor	PRKDC	-0.3862	1.0626	-1.4934
REP.B023_HEK293_24H:G01	BRD-K35189033	levonorgestrel	HEK293	trt_cp	2.22 uM	24 h	2	89	0.2491	0.150561	1	1	1	1	0	Estrogen receptor agonist|Glucocorticoid receptor antagonist|Progesterone receptor agonist|Progesterone receptor antagonist	PGR|CYP2E1|AR|ESR1|SRD5A1	-0.3862	1.0626	-1.4933
CPC014_HCC515_6H:BRD-K83837640-001-01-4:10	BRD-K83837640	JNJ-26481585	HCC515	trt_cp	10 uM	6 h	3	139	0.14	0.141059	1	0	1	1	0	HDAC inhibitor	HDAC1|HDAC10|HDAC11|HDAC2|HDAC3|HDAC4|HDAC5|HDAC6|HDAC7|HDAC8|HDAC9|MDM2	-0.3862	1.0626	-1.4932
CPC012_PHH_24H:BRD-K07403598-001-01-0:10	BRD-K07403598	CAY-10470	PHH	trt_cp	10 uM	24 h	3	459	0.5	0.48442	0	0	1	1	0	NFKB inhibitor	NFKB1|TNF	-0.3861	1.0626	-1.4927
LJP007_PC3_24H:D13	BRD-K73368362	BIX-02189	PC3	trt_cp	10 uM	24 h	2	89	0.2162	0.140266	1	0	1	1	0	MEK inhibitor	MAP2K5|MAPK7	-0.386	1.0626	-1.4925
REP.B028_HA1E_24H:C01	BRD-K92758126	MD-920	HA1E	trt_cp	1.25 uM	24 h	2	136	0.2807	0.19757	1	1	1	1	0	NFKB inhibitor	AADACL2	-0.3859	1.0626	-1.4922
CPC017_PHH_24H:BRD-K52721684-001-02-2:10	BRD-K52721684	PCO-400	PHH	trt_cp	10 uM	24 h	3	144	0.09	0.115115	0	0	1	1	0	Potassium channel activator	KCNJ8|ABCC9	-0.3859	1.0626	-1.4921
LJP005_HA1E_24H:D08	BRD-K63923597	barasertib-HQPA	HA1E	trt_cp	3.33 uM	24 h	3	69	0.38	0.163737	1	1	1	1	0	Aurora kinase inhibitor	AURKB|AURKC|AURKA	-0.3859	1.0626	-1.492
CPC018_ASC_24H:BRD-K37270826-001-16-9:10	BRD-K37270826	mifepristone	ASC	trt_cp	10 uM	24 h	3	130	0.21	0.167075	1	1	1	1	0	Glucocorticoid receptor antagonist|Progesterone receptor antagonist	PGR|NR3C1|AR|CYP2B6|CYP2C8|CYP3A5|CYP3A7|NR1I2	-0.3857	1.0626	-1.4915
POL001_HEPG2_24H:H19	BRD-K36737713	AG-957	HEPG2	trt_cp	10 uM	24 h	3	319	0.64	0.456894	1	1	1	1	0	Protein tyrosine kinase inhibitor	ABL1|EGFR	-0.3857	1.0626	-1.4914
CPC006_HA1E_24H:C02	BRD-K59184148	SB-216763	HA1E	trt_cp	10 uM	24 h	3	184	0.2817	0.230215	1	1	1	1	0	GSK inhibitor	GSK3B|CCNA2|CDK2|GSK3A	-0.3857	1.0626	-1.4913
CPC018_ASC_24H:BRD-K32501161-300-04-7:10	BRD-K32501161	vanoxerine	ASC	trt_cp	10 uM	24 h	3	292	0.23	0.262051	1	0	1	1	0	Dopamine receptor antagonist	SLC6A3|MAOA|MAOB	-0.3856	1.0624	-1.4911
PAC002_U2OS_6H:BRD-K50417881-003-05-9:10	BRD-K50417881	eticlopride	U2OS	trt_cp	10 uM	6 h	2	104	0.32	0.184469	0	0	1	1	0	Dopamine receptor antagonist	DRD2|DRD3|DRD4	-0.3856	1.0623	-1.491
CPC012_HT29_6H:BRD-K26818574-001-03-0:10	BRD-K26818574	BIX-01294	HT29	trt_cp	10 uM	6 h	5	437	0.45	0.448412	0	0	1	1	0	DNA inhibitor|Histone lysine methyltransferase inhibitor	EHMT2|EHMT1	-0.3856	1.0619	-1.4909
CPC003_HCC515_24H:BRD-K46469693-001-01-8:10	BRD-K46469693	SCH-442416	HCC515	trt_cp	10 uM	24 h	3	183	0.2	0.193451	1	0	1	1	0	Adenosine receptor antagonist	ADORA1|ADORA2A	-0.3855	1.0592	-1.4907
CPC013_HCC515_6H:BRD-K63068307-001-01-4:10	BRD-K63068307	ZSTK-474	HCC515	trt_cp	10 uM	6 h	3	219	0.34	0.275926	0	0	1	1	0	PI3K inhibitor	PIK3CG|PIK3CA|PIK3CB|PIK3CD	-0.3855	1.0378	-1.4906
CPC018_SKB_24H:BRD-K78126613-001-16-0:10	BRD-K78126613	menadione	SKB	trt_cp	10 uM	24 h	3	254	0.18	0.216214	1	0	1	1	0	Mitochondrial inhibitor|Phosphatase inhibitor	PKM|AOX1|BGLAP|F10|F2|F7|F9|GGCX|NQO1|NQO2|PROC|PROS1|PROZ|VKORC1|VKORC1L1	-0.3855	1.0516	-1.4906
MOAR005_A375_24H:K23	BRD-K43621685	CP-673451	A375	trt_cp	3.33 uM	24 h	3	214	0.59	0.359305	1	1	1	1	0	PDGFR inhibitor	PDGFRB|KIT|PDGFRA	-0.3854	1.0315	-1.49
REP.A001_A549_24H:P07	BRD-K30331124	ASC-J9	A549	trt_cp	10 uM	24 h	2	189	0.3083	0.244089	0	0	1	1	0	Androgen receptor agonist	AR	-0.3852	1.0306	-1.4896
REP.A025_HELA_24H:H07	BRD-A73908300	EX-527	HELA	trt_cp	10 uM	24 h	3	373	0.6036	0.479799	1	1	1	1	0	SIRT inhibitor	SIRT1	-0.3852	1.0306	-1.4896
CPC004_HEPG2_6H:BRD-A69815203-001-05-0:10	BRD-A69815203	cyclosporin-a	HEPG2	trt_cp	10 uM	6 h	3	156	0.27	0.207527	1	1	1	1	0	Calcineurin inhibitor	PPIA|PPP3CA	-0.3852	1.0303	-1.4894
REP.A024_A375_24H:C02	BRD-K74065929	doramapimod	A375	trt_cp	3.33 uM	24 h	3	286	0.4714	0.371286	1	1	1	1	0	P38 MAPK inhibitor	MAPK14|MAPK11|MAPK12|DDR2|MAPK13	-0.3851	1.03	-1.4891
CPC018_HEPG2_6H:BRD-A99449986-001-01-4:10	BRD-A99449986	MT-21	HEPG2	trt_cp	10 uM	6 h	3	51	0.04	0.0456715	1	0	1	1	0	Caspase activator	CYCS	-0.385	1.03	-1.4886
CPD001_MCF7_6H:B22	BRD-A00993607	alprenolol	MCF7	trt_cp	10 uM	6 h	3	161	0.2568	0.205608	0	0	1	1	0	Adrenergic receptor antagonist	ADRB1|ADRB2|HTR1A	-0.385	1.03	-1.4885
GMB001_HL60_2H:BRD-A13084692:10	BRD-A13084692	troglitazone	HL60	trt_cp	10 uM	2 h	6	306	0.25	0.27968	0	0	1	1	0	PPAR receptor agonist|Insulin sensitizer	PPARG|AKR1B1|CCL2|CYP3A4|INS|ACSL4|ESRRA|ESRRG|SERPINE1|SLC29A1|TRPM3	-0.385	1.03	-1.4885
CPC014_NEU_24H:BRD-U33728988-000-01-6:10	BRD-U33728988	QL-X-138	NEU	trt_cp	10 uM	24 h	2	310	0.59	0.432452	0	0	1	1	0	MTOR inhibitor	BTK|JAK3|MKNK2|MTOR|PRKDC	-0.3849	1.03	-1.4884
REP.B010_HELA_24H:M19	BRD-K15170068	swainsonine	HELA	trt_cp	2.5 uM	24 h	2	68	0.1657	0.107336	1	1	1	1	0	Alpha mannosidase inhibitor	MAN2A1	-0.3848	1.03	-1.4878
REP.A016_HA1E_24H:D13	BRD-A51820102	econazole	HA1E	trt_cp	10 uM	24 h	3	649	0.7906	0.724321	1	1	1	1	0	Lanosterol demethylase inhibitor|Bacterial cell wall synthesis inhibitor|Sterol demethylase inhibitor	CYP51A1|NPY1R|NPY2R|TRPM2|TRPV5	-0.3845	1.0298	-1.4868
TAA001_SHSY5Y_24H:A24	BRD-K68202742	BRD-K68202742	SHSY5Y	trt_cp	0.04 uM	24 h	2	336	0.6	0.454021	0	0	1	1	0	HDAC inhibitor|CDK expression enhancer|ID1 expression inhibitor	HDAC1|HDAC3|HDAC4|HDAC6|HDAC7|HDAC8|HDAC10|HDAC2|HDAC5|HDAC9	-0.3844	1.0297	-1.4862
CPC006_HEPG2_6H:BRD-A45889380-300-04-8:10	BRD-A45889380	mepacrine	HEPG2	trt_cp	10 uM	6 h	3	312	0.52	0.407295	1	1	1	1	0	NFKB inhibitor|Cytokine production inhibitor|p53 activator	TP53|AKT1|MTOR|NFKB1|PLA2G2A|PLA2G2D|PLA2G1B|PLA2G4A|PLA2G6|PLCL1	-0.3843	1.0292	-1.4859
LJP008_HCC515_24H:G19	BRD-K03406345	azacitidine	HCC515	trt_cp	10 uM	24 h	2	256	0.6723	0.4195	0	0	1	1	0	DNA inhibitor	DNMT1|DNMT3A	-0.3842	1.027	-1.4857
REP.A023_MDAMB231_24H:C01	BRD-K68232650	lacosamide	MDAMB231	trt_cp	10 uM	24 h	2	85	0.2574	0.14957	1	1	1	1	0	Collapsin response mediator protein stimulant|Sodium channel blocker	SCN3A|SCN9A|SCN1A|SCN10A|CYP2C19|DPYSL2|SCN11A|SCN2A|SCN4A|SCN5A|SCN7A|SCN8A	-0.3842	1.027	-1.4857
CPC006_U937_6H:BRD-K78959463-001-05-8:10	BRD-K78959463	FPL-64176	U937	trt_cp	10 uM	6 h	2	37	0.17	0.0801966	1	1	1	1	0	Calcium channel activator	CACNA1C|CACNA1S	-0.3842	1.0244	-1.4855
REP.B012_HA1E_24H:A10	BRD-K00077635	estramustine-phosphate	HA1E	trt_cp	0.08 uM	24 h	2	166	0.436	0.272037	0	0	1	1	0	DNA inhibitor|DNA alkylating agent|Estrogen receptor agonist|Tubulin inhibitor	ESR1|ESR2|MAP1A|MAP2	-0.3842	1.0244	-1.4855
CPC017_SKB_24H:BRD-K43389675-001-01-3:10	BRD-K43389675	daunorubicin	SKB	trt_cp	10 uM	24 h	2	471	0.6	0.537547	0	0	1	1	0	RNA synthesis inhibitor|Topoisomerase inhibitor	TOP2A|TOP2B	-0.3841	1.0239	-1.4853
CPC005_VCAP_24H:BRD-K50891186-001-03-6:10	BRD-K50891186	GR-103691	VCAP	trt_cp	10 uM	24 h	5	189	0.17	0.181253	0	0	1	1	0	Dopamine receptor antagonist	DRD3	-0.3841	1.0239	-1.4853
CPC017_SKB_24H:BRD-A80502530-001-01-2:10	BRD-A80502530	cinobufagin	SKB	trt_cp	10 uM	24 h	2	431	0.53	0.483289	0	0	1	1	0	Na/K-ATPase inhibitor	ATP1A1	-0.3841	1.0239	-1.4853
REP.A009_MCF10A_24H:O19	BRD-K28470988	L-690330	MCF10A	trt_cp	10 uM	24 h	3	70	0.2294	0.128138	1	1	1	1	0	Inositol monophosphatase inhibitor	IMPA1	-0.3841	1.0239	-1.4852
CPC018_HT29_6H:BRD-K44067360-001-16-2:10	BRD-K44067360	flufenamic-acid	HT29	trt_cp	10 uM	6 h	5	172	0.17	0.17291	1	0	1	1	0	Chloride channel blocker	AKR1C3|AR|PTGS1|PTGS2|ANO1|GJA1|GJA10|GJA3|GJA4|GJA5|GJA8|GJA9|GJB1|GJB2|GJB3|GJB4|GJB5|GJB6|GJB7|GJC1|GJC2|GJC3|GJD2|GJD3|GJD4|GJE1|PANX1|PANX2|PANX3|PKD2L1|TRPC5|TRPM2|TRPM5	-0.3841	1.0239	-1.485
CPC014_HA1E_6H:BRD-K85985071-001-20-7:10	BRD-K85985071	ellipticine	HA1E	trt_cp	10 uM	6 h	3	246	0.45	0.336437	1	1	1	1	0	Topoisomerase inhibitor	TOP2A|TOP2B	-0.384	1.0239	-1.4849
CPC016_A549_6H:BRD-K69600043-328-03-0:10	BRD-K69600043	thiethylperazine	A549	trt_cp	10 uM	6 h	2	157	0.35	0.237036	0	0	1	1	0	Dopamine receptor antagonist	DRD1|DRD2|DRD4	-0.384	1.0239	-1.4849
CPC006_HCT116_6H:BRD-A45889380-300-04-8:10	BRD-A45889380	mepacrine	HCT116	trt_cp	10 uM	6 h	2	226	0.27	0.249785	0	0	1	1	0	NFKB inhibitor|Cytokine production inhibitor|p53 activator	TP53|AKT1|MTOR|NFKB1|PLA2G2A|PLA2G2D|PLA2G1B|PLA2G4A|PLA2G6|PLCL1	-0.384	1.0239	-1.4848
PAC001_U2OS_6H:BRD-K72703948-001-01-0:10	BRD-K72703948	ZM-447439	U2OS	trt_cp	10 uM	6 h	2	72	0.34	0.158211	0	0	1	1	0	Aurora kinase inhibitor	AURKA|AURKB	-0.384	1.0239	-1.4848
CPC018_SKB_24H:BRD-K84595254-001-03-0:10	BRD-K84595254	strophanthidin	SKB	trt_cp	10 uM	24 h	3	504	0.61	0.560674	0	0	1	1	0	Na/K-ATPase inhibitor	ATP1A1	-0.384	1.0239	-1.4847
CPC002_VCAP_24H:BRD-K49671696-045-03-6:10	BRD-K49671696	ketanserin	VCAP	trt_cp	10 uM	24 h	3	104	0.19	0.142143	1	1	1	1	0	Serotonin receptor antagonist	HTR2A|HTR2C|ADRA1A|ADRA1B|ADRA1D|DRD1|DRD5|HTR1A|HTR1B|HTR1D|HTR2B|HTR5A|HTR7|SLC18A1|SLC18A2	-0.384	1.0239	-1.4847
REP.B003_HELA_24H:A09	BRD-K31111078	dimethyl-fumarate	HELA	trt_cp	0.25 uM	24 h	3	87	0.2458	0.14787	1	0	1	1	0	NRF2 activator|KEAP1 ligand|NFKB inhibitor	KEAP1|NFE2L2	-0.384	1.0239	-1.4847
CPC018_PHH_24H:BRD-K08619574-334-03-9:10	BRD-K08619574	thioproperazine	PHH	trt_cp	10 uM	24 h	3	183	0.2	0.193451	0	0	1	1	0	Dopamine receptor antagonist	ADRA1A|ADRA1B|DRD1|DRD2|HTR1A|HTR2A	-0.3839	1.0239	-1.4845
REP.A028_HA1E_24H:O24	BRD-A97479839	piperidolate	HA1E	trt_cp	0.04 uM	24 h	3	218	0.2486	0.235402	0	0	1	1	0	Acetylcholine receptor antagonist	CHRM1	-0.3837	1.0239	-1.4836
REP.A014_MCF10A_24H:E06	BRD-K58211978	roxithromycin	MCF10A	trt_cp	0.04 uM	24 h	3	108	0.0914	0.100465	0	0	1	1	0	Bacterial 50S ribosomal subunit inhibitor	ABCB1|MLNR	-0.3836	1.0229	-1.4831
CPC015_ASC_24H:BRD-A41519720-001-03-0:10	BRD-A41519720	ezetimibe	ASC	trt_cp	10 uM	24 h	4	248	0.29	0.271179	0	0	1	1	0	Cholesterol inhibitor|Niemann-Pick C1-like 1 protein antagonist	NPC1L1|ANPEP|SOAT1	-0.3835	1.0205	-1.4829
CPC017_HEPG2_6H:BRD-K71499074-001-03-8:10	BRD-K71499074	diclofenamide	HEPG2	trt_cp	10 uM	6 h	3	180	0.21	0.196597	1	0	1	1	0	Carbonic anhydrase inhibitor	CA1|CA2|CA4|CA12|CA7	-0.3835	1.0192	-1.4828
CPC015_SKB_24H:BRD-K32247306-001-17-9:10	BRD-K32247306	primidone	SKB	trt_cp	10 uM	24 h	2	176	0.17	0.174909	0	0	1	1	0	GABA receptor antagonist	GABRA1|GABRA2|GABRA3|GABRA4|GABRA5|GABRA6|GABRB1|GABRB2|GABRB3|GABRD|GABRE|GABRG1|GABRG2|GABRG3|GABRP|GABRQ|CHRNA4|CHRNA7|GRIA2|GRIK2|SCN10A|SCN11A|SCN1A|SCN2A|SCN3A|SCN4A|SCN5A|SCN7A|SCN8A|SCN9A	-0.3835	1.0172	-1.4827
REP.A024_MCF7_24H:E01	BRD-K74763371	bosentan	MCF7	trt_cp	10 uM	24 h	3	210	0.4796	0.320907	1	1	1	1	0	Endothelin receptor antagonist	EDNRB|EDNRA|ABCB1|CYP2C19|CYP3A4	-0.3834	1.0161	-1.4825
REP.A014_YAPC_24H:G01	BRD-K59227464	LY-2228820	YAPC	trt_cp	10 uM	24 h	3	186	0.4044	0.277327	1	1	1	1	0	P38 MAPK inhibitor	MAPK14	-0.3834	1.0154	-1.4823
CPC012_VCAP_24H:BRD-K49372556-001-01-7:10	BRD-K49372556	mofezolac	VCAP	trt_cp	10 uM	24 h	5	170	0.25	0.208461	0	0	1	1	0	Cyclooxygenase inhibitor	PTGS1	-0.3833	1.0152	-1.4822
CPC006_PC3_6H:BRD-K04623885-001-03-4:80	BRD-K04623885	BIBR-1532	PC3	trt_cp	80 uM	6 h	4	276	0.49	0.371863	1	1	1	1	0	Telomerase inhibitor	TERT	-0.3833	1.0148	-1.482
LJP009_CD34_24H:G19	BRD-K09132007	D-4476	CD34	trt_cp	10 uM	24 h	3	117	0.2737	0.180951	1	1	1	1	0	TGF-beta receptor inhibitor	CSNK1A1|CSNK1D|TGFB1	-0.3832	1.0146	-1.4819
CPC018_HT29_6H:BRD-K00312224-001-03-8:10	BRD-K00312224	PPT	HT29	trt_cp	10 uM	6 h	5	204	0.17	0.188309	1	0	1	1	0	Estrogen receptor agonist	ESR1	-0.3832	1.0144	-1.4817
CPC011_A549_6H:BRD-K20482099-001-06-0:10	BRD-K20482099	rutin	A549	trt_cp	10 uM	6 h	3	52	0.05	0.0515605	1	0	1	1	0	Antioxidant|Capillary stabilizing agent|Nitric oxide scavenger	AKR1C3|AKR1B1	-0.3831	1.0133	-1.4814
CPC016_NPC_24H:BRD-K92073408-001-03-3:10	BRD-K92073408	BRD-K92073408	NPC	trt_cp	10 uM	24 h	4	215	0.21	0.214862	0	0	1	1	0	Progestogen hormone|Progesterone receptor agonist	PGR	-0.3831	1.0134	-1.4814
REP.A019_A549_24H:K17	BRD-K49215523	GSK-2636771	A549	trt_cp	0.125 uM	24 h	2	133	0.2111	0.169434	0	0	1	1	0	PI3K inhibitor	PIK3CB	-0.3829	1.0055	-1.4805
CPC004_HA1E_24H:BRD-K41713976-300-01-8:10	BRD-K41713976	E-4031	HA1E	trt_cp	10 uM	24 h	3	97	0.14	0.117837	1	0	1	1	0	Potassium channel antagonist	KCNH2|KCNH1	-0.3829	1.0056	-1.4805
REP.A022_HEK293_24H:M15	BRD-K72414522	AZD-5438	HEK293	trt_cp	1.11 uM	24 h	3	190	0.2973	0.240328	0	0	1	1	0	CDK inhibitor	CCNB1|CCNE1|CDK1|CDK2|KCNH2	-0.3829	1.0048	-1.4804
CPC005_HT29_6H:BRD-A07000685-001-03-6:10	BRD-A07000685	hydrocortisone-hemisuccinate	HT29	trt_cp	10 uM	6 h	3	258	0.36	0.308171	0	0	1	1	0	Glucocorticoid receptor agonist	NR3C1	-0.3829	1.0051	-1.4804
LJP006_MDAMB231_24H:M21	BRD-K19687926	lapatinib	MDAMB231	trt_cp	1.11 uM	24 h	2	102	0.4709	0.221613	1	1	1	1	0	EGFR inhibitor|ERBB2 inhibitor	EGFR|ERBB2|CYP3A5	-0.3828	1.0045	-1.4803
CPC017_A375_6H:BRD-K71731651-001-01-9:10	BRD-K71731651	PNU-120596	A375	trt_cp	10 uM	6 h	3	213	0.09	0.140004	0	0	1	1	0	Acetylcholine receptor agonist	CHRNA7	-0.3828	1.0041	-1.4802
CPC017_HEPG2_6H:BRD-K26015241-001-01-0:10	BRD-K26015241	ODQ	HEPG2	trt_cp	10 uM	6 h	3	377	0.28	0.328534	1	1	1	1	0	Guanylyl cyclase inhibitor	GUCY1A2|GUCY1A3|GUCY1B3	-0.3827	1.0032	-1.4799
MOAR003_A375_24H:N24	BRD-K33226500	indinavir	A375	trt_cp	1.11 uM	24 h	3	104	0.23	0.156391	1	1	1	1	0	HIV inhibitor	CYP3A5|CYP3A4|CYP3A7	-0.3827	1.0033	-1.4799
PBIOA022_HA1E_24H:N07	BRD-K16189898	CHIR-99021	HA1E	trt_cp	10 uM	24 h	3	318	0.59	0.437996	1	1	1	1	0	GSK inhibitor	CDK1|GSK3A|GSK3B|MAPK1	-0.3824	1.0025	-1.4787
CPC014_NPC_24H:BRD-K98372770-001-04-1:10	BRD-K98372770	L-2167	NPC	trt_cp	10 uM	24 h	3	126	0.13	0.129416	0	0	1	1	0	PPAR receptor agonist	PPARD	-0.3824	1.0025	-1.4786
CPC018_ASC_24H:BRD-K36055864-001-09-3:10	BRD-K36055864	cycloheximide	ASC	trt_cp	10 uM	24 h	3	342	0.47	0.405408	1	1	1	1	0	Protein synthesis inhibitor	GSK3B|RPL3	-0.3823	1.0021	-1.4783
REP.A004_A549_24H:E04	BRD-A20119038	mecamylamine	A549	trt_cp	0.37 uM	24 h	3	128	0.0752	0.0992075	0	0	1	1	0	Acetylcholine receptor antagonist	CHRNA2|CHRNA1|CHRNA3|CHRNA4|CHRNA6|CHRNA7	-0.3823	1.0017	-1.4782
LJP001_BT20_6H:BRD-K78431006-001-04-5:10	BRD-K78431006	crizotinib	BT20	trt_cp	10 uM	6 h	4	152	0.31	0.219499	1	1	1	1	0	ALK inhibitor	ALK|MET|CYP2B6|CYP3A5|MST1R|ROS1	-0.3822	1.0008	-1.478
EMU001_NALM6_24H:O08	BRD-K64034691	acalabrutinib	NALM6	trt_cp	2.5 uM	24 h	2	196	0.1031	0.143743	1	0	1	1	0	BTK inhibitor	BTK	-0.3821	0.9962	-1.4773
CPC006_SW480_6H:BRD-A58048407-001-10-5:10	BRD-A58048407	nimodipine	SW480	trt_cp	10 uM	6 h	2	129	0.13	0.130947	0	0	1	1	0	Calcium channel blocker	CACNA1C|NR3C2|CACNA1D|CACNA1F|CACNA1S|AHR|CACNB1|CACNB2|CACNB3|CACNB4|CFTR	-0.3819	0.9903	-1.4769
REP.B008_HA1E_24H:A12	BRD-A68009927	daunorubicin	HA1E	trt_cp	0.01 uM	24 h	2	165	0.2579	0.208592	1	1	1	1	0	RNA synthesis inhibitor|Topoisomerase inhibitor	TOP2A|TOP2B	-0.3819	0.9904	-1.4769
POL001_JURKAT_24H:C04	BRD-K06792661	narciclasine	JURKAT	trt_cp	0.37 uM	24 h	3	660	0.79	0.730157	0	0	1	1	0	LIM kinase activator|Rho associated kinase activator	RHOA	-0.3819	0.9776	-1.4767
CPC014_HA1E_6H:BRD-K30743633-001-06-6:10	BRD-K30743633	TCPOBOP	HA1E	trt_cp	10 uM	6 h	3	101	0.24	0.157433	1	0	1	1	0	CAR agonist	NR1I3	-0.3817	0.9721	-1.4761
CPC018_SKB_24H:BRD-A89337244-001-01-1:10	BRD-A89337244	PD-102807	SKB	trt_cp	10 uM	24 h	3	259	0.45	0.345213	0	0	1	1	0	Acetylcholine receptor antagonist	CHRM4	-0.3818	0.9722	-1.4761
CPC012_PC3_6H:BRD-A15010982-001-01-9:10	BRD-A15010982	HU-211	PC3	trt_cp	10 uM	6 h	4	180	0.25	0.214505	1	0	1	1	0	Glutamate receptor antagonist	CNR1|CNR2|GRIN1	-0.3817	0.9701	-1.4758
LJP007_CD34_24H:I07	BRD-K74514084	pazopanib	CD34	trt_cp	10 uM	24 h	3	220	0.3835	0.293714	1	1	1	1	0	VEGFR inhibitor|KIT inhibitor|PDGFR inhibitor	KDR|KIT|FLT1|FLT4|PDGFRB|PDGFRA|BRAF|CYP2B6|CYP2C8|CYP2E1|DDR2|CSF1R|FGF1|FGFR1|FGFR3|ITK|SH2B3	-0.3817	0.9702	-1.4758
LJP001_MDAMB231_24H:BRD-K04923131-001-10-5:2	BRD-K04923131	BRD-K04923131	MDAMB231	trt_cp	2.22 uM	24 h	4	257	0.52	0.369657	1	1	1	1	0	GSK inhibitor|Lipoxygenase inhibitor	GSK3B|ALOX5|GSK3A	-0.3817	0.9703	-1.4758
REP.A008_HA1E_24H:N01	BRD-A87983072	benzotript	HA1E	trt_cp	10 uM	24 h	3	313	0.5038	0.401543	0	0	1	1	0	CCK receptor antagonist	CCKBR|CCKAR	-0.3817	0.9699	-1.4757
CPC006_NCIH596_6H:BRD-K35960502-001-10-1:10	BRD-K35960502	niclosamide	NCIH596	trt_cp	10 uM	6 h	2	224	0.46	0.324589	0	0	1	1	0	DNA inhibitor|STAT inhibitor	STAT3	-0.3816	0.9695	-1.4755
CPC016_NEU_24H:BRD-K06543683-066-01-3:10	BRD-K06543683	bisindolylmaleimide-ix	NEU	trt_cp	10 uM	24 h	3	478	0.65	0.563639	0	0	1	1	0	PKC inhibitor	SIRT1|LRRK2|SIRT2|AKT1|GSK3B|LCK|MAPK1|MAPK11|MAPK12|MAPK14|MAPK8|PRKCA|ROCK1|RPS6KB1	-0.3815	0.969	-1.4753
REP.A008_HA1E_24H:N07	BRD-K88025533	fingolimod	HA1E	trt_cp	10 uM	24 h	2	824	0.8488	0.845662	0	0	1	1	0	Immunosuppressant|Sphingosine 1 phosphate receptor agonist	S1PR1|S1PR5|S1PR3|S1PR4|CYP2E1|CYP4F2|SPHK1	-0.3815	0.9685	-1.4751
CPC017_ASC_24H:BRD-A49906757-004-03-1:10	BRD-A49906757	BRD-A49906757	ASC	trt_cp	10 uM	24 h	4	216	0.08	0.132924	0	0	1	1	0	Acetylcholine receptor antagonist	CHRM2|CHRM1|CHRM3|CHRM4|CHRM5|SI	-0.3815	0.9684	-1.475
REP.B007_YAPC_24H:C01	BRD-K43723251	chenodiol	YAPC	trt_cp	2.22 uM	24 h	2	108	0.3852	0.206246	1	1	1	1	0	11-beta-HSD1 inhibitor	HSD11B1	-0.3814	0.968	-1.4749
CPC017_PHH_24H:BRD-K04546108-066-01-5:10	BRD-K04546108	BRD-K04546108	PHH	trt_cp	10 uM	24 h	3	203	0.36	0.273357	0	0	1	1	0	JAK inhibitor	JAK3	-0.3814	0.9675	-1.4748
CPC012_SKB_24H:BRD-K02130563-001-06-4:10	BRD-K02130563	panobinostat	SKB	trt_cp	10 uM	24 h	3	473	0.65	0.560684	0	0	1	1	0	HDAC inhibitor	HDAC1|HDAC2|HDAC3|HDAC4|HDAC6|HDAC7|HDAC8|HDAC9	-0.3814	0.9674	-1.4747
CPC016_ASC_24H:BRD-K97158071-001-08-2:10	BRD-K97158071	droperidol	ASC	trt_cp	10 uM	24 h	3	75	0.14	0.103616	1	0	1	1	0	Dopamine receptor antagonist	DRD2|ADRA1A|DRD3|DRD4|HTR2A	-0.3814	0.9667	-1.4746
CPC005_HA1E_6H:BRD-K30480208-001-05-2:10	BRD-K30480208	torasemide	HA1E	trt_cp	10 uM	6 h	2	138	0.38	0.231559	1	1	1	1	0	Thromboxane receptor antagonist	SLC12A1|CYP2C8|SLC12A2	-0.3813	0.9657	-1.4743
LJP006_HT29_24H:E23	BRD-K64800655	PHA-793887	HT29	trt_cp	0.12 uM	24 h	2	115	0.4734	0.235936	0	0	1	1	0	CDK inhibitor	CDK1|CDK2|CDK4|CDK5|CCND1|CCNE1|CDK7|CDK9	-0.3812	0.964	-1.4739
LJP008_HEK293_24H:D01	BRD-K02113016	olaparib	HEK293	trt_cp	10 uM	24 h	2	224	0.342	0.279877	1	1	1	1	0	PARP inhibitor	PARP1|PARP2|PARP3	-0.3812	0.964	-1.4739
CPC006_VCAP_6H:BRD-K02113016-001-01-4:44.4	BRD-K02113016	olaparib	VCAP	trt_cp	40 uM	6 h	4	98	0.2	0.141566	1	1	1	1	0	PARP inhibitor	PARP1|PARP2|PARP3	-0.3811	0.9636	-1.4737
CPC017_SKB_24H:BRD-K49577446-001-03-1:10	BRD-K49577446	flunisolide	SKB	trt_cp	10 uM	24 h	2	186	0.1	0.137907	0	0	1	1	0	Cytochrome P450 inhibitor	NR3C1	-0.3811	0.9632	-1.4735
CPC013_MCF7_6H:BRD-K61192372-001-01-4:10	BRD-K61192372	capecitabine	MCF7	trt_cp	10 uM	6 h	4	179	0.12	0.1482	1	0	1	1	0	DNA inhibitor|Thymidylate synthase inhibitor	TYMS|DPYD	-0.3811	0.9632	-1.4735
CPC005_A375_24H:BRD-A72483914-001-02-9:10	BRD-A72483914	spiroxatrine	A375	trt_cp	10 uM	24 h	3	63	0.17	0.104647	1	0	1	1	0	Serotonin receptor antagonist	HTR1A|ADRA1A|ADRA1B|ADRA1D|ADRA2A|ADRA2B|ADRA2C|HTR2B	-0.3811	0.9632	-1.4735
CPC006_NCIH596_6H:BRD-K61250553-003-13-2:10	BRD-K61250553	loperamide	NCIH596	trt_cp	10 uM	6 h	2	310	0.17	0.232132	0	0	1	1	0	Opioid receptor agonist	OPRM1|OPRD1|CYP2B6|CYP2C8|NPR2|CACNA1A|CALM1|OPRK1|POMC	-0.381	0.9623	-1.4733
ASG003_U2OS_48H:O11	BRD-K76674262	BRD-K76674262	U2OS	trt_cp	1.11 uM	48 h	5	727	0.8352	0.78794	0	0	1	1	0	Protein synthesis inhibitor	RPL3	-0.381	0.9605	-1.473
LJP009_CD34_24H:O07	BRD-A29901043	KIN001-127	CD34	trt_cp	10 uM	24 h	3	205	0.4701	0.313908	1	1	1	1	0	ITK inhibitor	ITK	-0.3809	0.959	-1.4729
LJP005_HS578T_24H:C07	BRD-K00337317	NU-7441	HS578T	trt_cp	10 uM	24 h	3	396	0.5	0.449949	0	0	1	1	0	P-glycoprotein inhibitor|DNA dependent protein kinase inhibitor	PRKDC|ABCB1	-0.3809	0.9591	-1.4729
REP.A021_HA1E_24H:I01	BRD-K83699324	NMS-1286937	HA1E	trt_cp	10 uM	24 h	3	465	0.6361	0.549946	1	1	1	1	0	PLK inhibitor	PLK1|FLT3|PLK2|PLK3	-0.3809	0.9575	-1.4727
MOAR004_A375_24H:C04	BRD-K68997413	PF-3845	A375	trt_cp	10 uM	24 h	3	203	0.39	0.284519	1	1	1	1	0	FAAH inhibitor	FAAH	-0.3808	0.9561	-1.4725
CPC014_HA1E_6H:BRD-A74904029-001-05-7:10	BRD-A74904029	EI-231	HA1E	trt_cp	10 uM	6 h	3	262	0.18	0.219592	1	0	1	1	0	Casein kinase inhibitor	CSNK2A1	-0.3808	0.9558	-1.4724
REP.A004_HA1E_24H:L17	BRD-K20920669	cromoglicic-acid	HA1E	trt_cp	0.125 uM	24 h	3	89	0.109	0.0995953	1	1	1	1	0	Immunosuppressant	KCNMA1|S100P	-0.3808	0.9553	-1.4723
REP.B027_HELA_24H:M08	BRD-K90868879	canagliflozin	HELA	trt_cp	0.74 uM	24 h	2	74	0.1742	0.114808	1	0	1	1	0	Sodium channel inhibitor	SLC5A2|SLC5A1|CYP2B6|CYP2C8	-0.3807	0.9549	-1.4721
CPC018_ASC_24H:BRD-K30816563-003-01-1:10	BRD-K30816563	ranitidine	ASC	trt_cp	10 uM	24 h	3	161	0.17	0.167289	1	0	1	1	0	Histamine receptor antagonist	HRH2|SLC22A2	-0.3806	0.9536	-1.4717
REP.B003_HA1E_24H:P21	BRD-K36732695	setiptiline	HA1E	trt_cp	0.25 uM	24 h	3	133	0.3165	0.207464	1	1	1	1	0	Adrenergic receptor antagonist	HTR2A|HTR2C|HRH1	-0.3805	0.9525	-1.4711
CPD002_MCF7_24H:BRD-K71289571-001-07-2:10	BRD-K71289571	zafirlukast	MCF7	trt_cp	10 uM	24 h	3	129	0.34	0.21177	1	1	1	1	0	Leukotriene receptor antagonist	CYSLTR1|CYSLTR2	-0.3803	0.9524	-1.4706
CPC003_HCC515_24H:BRD-K82255054-001-08-4:10	BRD-K82255054	propofol	HCC515	trt_cp	10 uM	24 h	3	81	0.14	0.107681	1	0	1	1	0	GABA receptor agonist	GABRA1|GABRA2|GABRA3|GABRA4|GABRA5|GABRA6|GABRB1|GABRB2|GABRB3|GABRD|GABRE|GABRG1|GABRG2|GABRG3|GABRP|GABRQ|CYP2B6|TRPV1|FAAH|SCN2A|SCN4A	-0.3803	0.9524	-1.4706
REP.A017_HT29_24H:J02	BRD-K64504314	dienogest	HT29	trt_cp	3.33 uM	24 h	3	71	0.2015	0.120948	1	1	1	1	0	Progesterone receptor agonist	PGR	-0.3803	0.9524	-1.4705
CPC007_VCAP_6H:I15	BRD-K43149758	myricetin	VCAP	trt_cp	10 uM	6 h	4	83	0.1602	0.116601	1	0	1	1	0	Androgen receptor agonist|Cytochrome P450 inhibitor	PIK3CG|AR|CYP3A4	-0.3802	0.9524	-1.4701
CPC013_ASC_24H:BRD-K64881305-001-01-1:10	BRD-K64881305	ispinesib	ASC	trt_cp	10 uM	24 h	4	206	0.31	0.255532	1	1	1	1	0	Kinesin inhibitor	KIF11	-0.3802	0.9524	-1.4699
CPC014_PHH_24H:BRD-K19540840-001-02-9:10	BRD-K19540840	saracatinib	PHH	trt_cp	10 uM	24 h	3	133	0.24	0.18066	0	0	1	1	0	Src inhibitor	SRC|ABL1|LCK|YES1	-0.38	0.9524	-1.4692
CPC004_MCF7_6H:BRD-A25687296-300-03-5:10	BRD-A25687296	emetine	MCF7	trt_cp	10 uM	6 h	4	538	0.7	0.620541	1	1	1	1	0	Protein synthesis inhibitor	RPS2	-0.3799	0.9524	-1.469
REP.A012_HELA_24H:E07	BRD-A00938334	drospirenone	HELA	trt_cp	10 uM	24 h	2	440	0.6978	0.560302	1	1	1	1	0	Mineralocorticoid receptor antagonist	NR3C2|PGR|AR	-0.3799	0.9523	-1.4688
CPC006_HCC515_6H:H03	BRD-K16554956	PTB1	HCC515	trt_cp	10 uM	6 h	3	180	0.1993	0.191523	1	0	1	1	0	AMPK activator	PTPN1	-0.3797	0.9476	-1.4681
CPC006_NCIH2073_6H:BRD-K36324071-363-01-3:10	BRD-K36324071	NF-449	NCIH2073	trt_cp	10 uM	6 h	2	59	0.03	0.0425419	0	0	1	1	0	Purinergic receptor antagonist	P2RX1	-0.3796	0.9466	-1.4679
CPC006_AGS_6H:BRD-K04853698-003-01-4:10	BRD-K04853698	LDN-193189	AGS	trt_cp	10 uM	6 h	2	217	0.21	0.215859	1	0	1	1	0	Serine/threonine kinase inhibitor	ACVR1|BMPR1A	-0.3795	0.9458	-1.4673
LJP005_HCC515_24H:D13	BRD-K79404599	enzastaurin	HCC515	trt_cp	10 uM	24 h	3	192	0.47	0.30376	1	1	1	1	0	PKC inhibitor	PRKCB|AKT1|GSK3B|PRKCA|PRKCD|PRKCG	-0.3794	0.9458	-1.467
CPC018_ASC_24H:BRD-A41451487-001-04-7:10	BRD-A41451487	PK-11195	ASC	trt_cp	10 uM	24 h	3	169	0.11	0.13787	1	0	1	1	0	Benzodiazepine receptor antagonist	TSPO|NR1I2|NR1I3	-0.3794	0.9458	-1.4669
REP.B011_YAPC_24H:D01	BRD-A04553218	BRD-A04553218	YAPC	trt_cp	2.22 uM	24 h	2	565	0.7251	0.647223	0	0	1	1	0	Histamine receptor antagonist	HRH1|SLC6A2|SLC6A3|SLC6A4	-0.3793	0.9457	-1.4667
LJP007_HEPG2_24H:C19	BRD-K79090631	CGP-60474	HEPG2	trt_cp	10 uM	24 h	2	391	0.7352	0.542153	0	0	1	1	0	CDK inhibitor	CDK1|CDK2	-0.3792	0.9453	-1.4661
PAC004_U2OS_6H:BRD-K13078532-001-04-5:10	BRD-K13078532	hydrochlorothiazide	U2OS	trt_cp	10 uM	6 h	2	59	0.21	0.112555	1	0	1	1	0	Thiazide diuretic	SLC12A3|CA1|CA12|CA2|CA4|CA9|KCNMA1	-0.3792	0.9453	-1.466
REP.B006_A375_24H:M01	BRD-K22861715	chrysin	A375	trt_cp	2.22 uM	24 h	2	145	0.25	0.192524	0	0	1	1	0	Breast cancer resistance protein inhibitor	ABCG2|AKR1B1|CDK6|CYP19A1|CYP1B1	-0.3791	0.9452	-1.4659
CPC016_NEU_24H:BRD-K14693417-001-03-2:10	BRD-K14693417	cinchonine	NEU	trt_cp	10 uM	24 h	3	254	0.09	0.152886	0	0	1	1	0	P-glycoprotein inhibitor	CYP2D6	-0.3791	0.945	-1.4657
CPC006_NOMO1_6H:BRD-K56301217-001-01-7:11.1	BRD-K56301217	ABT-737	NOMO1	trt_cp	12 uM	6 h	2	468	0.06	0.169445	0	0	1	1	0	BCL inhibitor	BCL2|BCL2L1|BCL2L2	-0.3791	0.9451	-1.4657
PAC002_U2OS_6H:BRD-K55344148-003-01-8:10	BRD-K55344148	BU-224	U2OS	trt_cp	10 uM	6 h	2	64	0.27	0.132924	0	0	1	1	0	Imidazoline receptor agonist|Imidazoline ligand	MAOA|MAOB	-0.3788	0.9441	-1.4646
REP.B010_HEK293_24H:N07	BRD-K14993104	bemegride	HEK293	trt_cp	2.22 uM	24 h	2	60	0.0354	0.0466024	0	0	1	1	0	Chemoreceptor agonist	GABRA1	-0.3787	0.9438	-1.4643
REP.A006_HELA_24H:G24	BRD-K21071223	VP-20629	HELA	trt_cp	0.04 uM	24 h	3	172	0.2962	0.228238	1	0	1	1	0	Beta amyloid inhibitor	APP|PLA2G2E|SLC36A1	-0.3787	0.9438	-1.4643
REP.A026_A549_24H:C07	BRD-K88366685	trimetazidine	A549	trt_cp	10 uM	24 h	2	74	0.1628	0.110987	0	0	1	1	0	3-ketoacyl CoA thiolase inhibitor	ACAA2	-0.3785	0.9423	-1.4637
REP.B009_HA1E_24H:E02	BRD-A29485665	bicalutamide	HA1E	trt_cp	0.74 uM	24 h	2	216	0.3721	0.286673	0	0	1	1	0	Androgen receptor antagonist	AR|CYP2C19	-0.3785	0.9406	-1.4634
CPC014_SKB_24H:BRD-K52751261-001-01-2:10	BRD-K52751261	TAK-715	SKB	trt_cp	10 uM	24 h	4	545	0.33	0.428831	0	0	1	1	0	P38 MAPK inhibitor	MAPK14|TNF	-0.3784	0.9396	-1.4633
LPROT004_YAPC_6H:BRD-K87124298:2	BRD-K87124298	OSI-027	YAPC	trt_cp	2.22 uM	6 h	3	310	0.68	0.464265	1	1	1	1	0	MTOR inhibitor	MTOR	-0.3784	0.9385	-1.4631
CPC018_SKB_24H:BRD-K97399794-001-10-4:10	BRD-K97399794	quercetin	SKB	trt_cp	10 uM	24 h	3	166	0.13	0.148544	1	0	1	1	0	Polar auxin transport inhibitor	PIK3CG|AKR1B1|CYP2C8|EGFR|GAA|MAOA|PTPN1|SCN5A|SIRT1|XDH|ATP5A1|ATP5B|ATP5C1|HCK|HIBCH|PIM1|STK17B|UGT3A1	-0.3783	0.9377	-1.4628
REP.B008_HEK293_24H:A08	BRD-A68009927	daunorubicin	HEK293	trt_cp	0.74 uM	24 h	2	503	0.6964	0.598472	1	1	1	1	0	RNA synthesis inhibitor|Topoisomerase inhibitor	TOP2A|TOP2B	-0.3783	0.9377	-1.4627
REP.B026_JURKAT_24H:H01	BRD-K89917372	retigabine	JURKAT	trt_cp	2.22 uM	24 h	2	78	0.0656	0.0723319	0	0	1	1	0	Potassium channel activator	KCNQ2|KCNQ3|KCNQ4|KCNQ5|ABAT|KCNQ1	-0.3782	0.9372	-1.4625
LJP009_SKL_24H:A23	BRD-A10523515	GSK-429286A	SKL	trt_cp	0.12 uM	24 h	2	327	0.5736	0.437934	1	1	1	1	0	Rho associated kinase inhibitor	ROCK1	-0.3782	0.9361	-1.4622
CPC017_SKB_24H:BRD-K05151076-001-01-8:10	BRD-K05151076	ZK-164015	SKB	trt_cp	10 uM	24 h	2	167	0.45	0.277201	0	0	1	1	0	Estrogen receptor antagonist	ESR1|ESR2	-0.3781	0.9242	-1.462
CPC006_HEPG2_6H:BRD-K68336408-001-04-2:56.78	BRD-K68336408	BRD-K68336408	HEPG2	trt_cp	60 uM	6 h	3	246	0.52	0.361659	1	1	1	1	0	EGFR inhibitor	EGFR|MAPK14	-0.378	0.9176	-1.4615
PBIOA022_HCC515_24H:N07	BRD-K16189898	CHIR-99021	HCC515	trt_cp	10 uM	24 h	3	341	0.66	0.479711	1	1	1	1	0	GSK inhibitor	CDK1|GSK3A|GSK3B|MAPK1	-0.3779	0.915	-1.4611
CPC005_HA1E_6H:BRD-K18518344-001-03-5:10	BRD-K18518344	digitoxigenin	HA1E	trt_cp	10 uM	6 h	2	396	0.6	0.492894	1	1	1	1	0	Na/K-ATPase inhibitor	ATP1A1	-0.3777	0.9062	-1.4606
CPC009_MCF7_24H:BRD-K84141129-001-01-0:10	BRD-K84141129	VU-0400193-3	MCF7	trt_cp	10 uM	24 h	2	73	0.17	0.112646	1	0	1	1	0	Glutamate receptor antagonist	GRM4	-0.3777	0.9062	-1.4605
AICHI001_SKMEL5_24H:E24	BRD-K53581288	baricitinib	SKMEL5	trt_cp	0.01 uM	24 h	3	77	0.17	0.115691	1	0	1	1	0	JAK inhibitor	JAK1|JAK2	-0.3777	0.9062	-1.4603
REP.B008_PC3_24H:K01	BRD-K90239174	AMG-487	PC3	trt_cp	2.22 uM	24 h	2	85	0.2292	0.141139	0	0	1	1	0	CC chemokine receptor antagonist	CXCR3	-0.3776	0.9062	-1.4601
REP.A018_A549_24H:H19	BRD-A64406146	timofibrate	A549	trt_cp	10 uM	24 h	2	93	0.1705	0.127331	0	0	1	1	0	Cholesterol inhibitor|Lipase clearing factor inhibitor	LPL	-0.3776	0.9062	-1.46
CPC015_SKB_24H:BRD-K28183345-003-07-2:10	BRD-K28183345	proguanil	SKB	trt_cp	10 uM	24 h	2	63	0.37	0.154384	0	0	1	1	0	Dihydrofolate reductase inhibitor	CYP2C19|DHFR	-0.3774	0.9062	-1.4593
CPC018_SKB_24H:BRD-K54142781-003-02-7:10	BRD-K54142781	cirazoline	SKB	trt_cp	10 uM	24 h	3	162	0.41	0.260603	0	0	1	1	0	Adrenergic receptor agonist	ADRA1A	-0.3774	0.9061	-1.4592
CPC015_PHH_24H:BRD-K43290182-001-01-9:10	BRD-K43290182	Ro-04-6790	PHH	trt_cp	10 uM	24 h	2	111	0.21	0.154384	0	0	1	1	0	Serotonin receptor antagonist	HTR6	-0.3773	0.9059	-1.459
REP.B022_MDAMB231_24H:A11	BRD-K74363950	aclidinium	MDAMB231	trt_cp	0.03 uM	24 h	2	148	0.1832	0.166504	0	0	1	1	0	Acetylcholine receptor antagonist	CHRM3|CHRM1|CHRM2|CHRM4|CHRM5	-0.3773	0.906	-1.459
LJP007_HELA_24H:A07	BRD-K64857848	XMD-885	HELA	trt_cp	10 uM	24 h	3	320	0.4323	0.376096	1	1	1	1	0	MAP kinase inhibitor	MAPK7|LRRK2	-0.3773	0.9054	-1.4588
CPC015_HEPG2_6H:BRD-A68930007-001-03-1:10	BRD-A68930007	ouabain	HEPG2	trt_cp	10 uM	6 h	2	191	0.38	0.27242	0	0	1	1	0	Na/K-ATPase inhibitor	ATP1A1|ATP1A2|ATP1A3|ATP1A4|ATP1B1|ATP1B2|ATP1B3|ATP1B4|FXYD2	-0.3772	0.9045	-1.4586
CPC006_SW480_6H:BRD-K77947974-001-05-6:4.21	BRD-K77947974	fluspirilene	SW480	trt_cp	4 uM	6 h	2	97	0.17	0.12985	0	0	1	1	0	Dopamine receptor antagonist	DRD2|HTR2A|CACNG1|HRH1|HTR1A|HTR1D|HTR1E	-0.3772	0.9045	-1.4586
LJP007_HUVEC_24H:A07	BRD-K64857848	XMD-885	HUVEC	trt_cp	10 uM	24 h	3	434	0.5556	0.496543	1	1	1	1	0	MAP kinase inhibitor	MAPK7|LRRK2	-0.3772	0.9047	-1.4586
REP.A017_MDAMB231_24H:L19	BRD-K67068943	ORE-1001	MDAMB231	trt_cp	10 uM	24 h	3	110	0.0465	0.0723192	0	0	1	1	0	ACE inhibitor	ACE2	-0.3772	0.9042	-1.4585
CPC006_U937_6H:BRD-K73261812-001-01-1:10	BRD-K73261812	BRD-K73261812	U937	trt_cp	10 uM	6 h	2	146	0.51	0.275926	1	1	1	1	0	Beta catenin inhibitor	CTNNB1	-0.3772	0.9042	-1.4585
CPC018_ASC_24H:BRD-K46469693-001-01-8:10	BRD-K46469693	SCH-442416	ASC	trt_cp	10 uM	24 h	3	369	0.36	0.368549	1	0	1	1	0	Adenosine receptor antagonist	ADORA1|ADORA2A	-0.3772	0.9033	-1.4584
CPC017_PHH_24H:BRD-K62353524-001-01-8:10	BRD-K62353524	DY-131	PHH	trt_cp	10 uM	24 h	3	224	0.42	0.310155	0	0	1	1	0	Estrogen receptor agonist	ESRRG|ESRRB|ESR2	-0.3772	0.9034	-1.4584
REP.B010_PC3_24H:P19	BRD-A15435692	BMY-14802	PC3	trt_cp	2.22 uM	24 h	2	79	0.1558	0.112183	0	0	1	1	0	Sigma receptor antagonist	HTR1A|SIGMAR1	-0.3771	0.9029	-1.4583
REP.B013_HUVEC.A_24H:A20	BRD-K37561857	zardaverine	HUVEC	trt_cp	0.74 uM	24 h	2	274	0.3876	0.329532	0	0	1	1	0	Phosphodiesterase inhibitor	PDE4D|PDE3A|PDE4A|PDE4B|PDE4C	-0.3772	0.9031	-1.4583
REP.B008_YAPC_24H:O24	BRD-K89704198	vincamine	YAPC	trt_cp	0.01 uM	24 h	2	100	0.2475	0.159081	0	0	1	1	0	Adrenergic receptor antagonist	CHRM1|CHRM2|CHRM3|CHRM4	-0.3772	0.9031	-1.4583
CPC014_PHH_24H:BRD-K77390737-001-03-2:10	BRD-K77390737	xanthohumol	PHH	trt_cp	10 uM	24 h	4	140	0.31	0.210657	0	0	1	1	0	ATPase inhibitor	VCP	-0.3771	0.9008	-1.458
CPC004_HEPG2_6H:BRD-K36055864-001-09-3:10	BRD-K36055864	cycloheximide	HEPG2	trt_cp	10 uM	6 h	3	273	0.46	0.358336	1	1	1	1	0	Protein synthesis inhibitor	GSK3B|RPL3	-0.377	0.8998	-1.4579
CPC015_ASC_24H:BRD-A06352418-001-15-0:10	BRD-A06352418	terfenadine	ASC	trt_cp	10 uM	24 h	4	117	0.17	0.142609	0	0	1	1	0	Histamine receptor antagonist	HRH1|KCNH2|CHRM1|CHRM2|CHRM3|CHRM4|CHRM5|KCNH1	-0.377	0.8994	-1.4578
REP.B022_HUVEC.A_24H:P15	BRD-A82156122	saxagliptin	HUVEC	trt_cp	0.25 uM	24 h	2	178	0.0115	0.0457498	0	0	1	1	0	Dipeptidyl peptidase inhibitor	DPP4|CYP3A5	-0.3769	0.8983	-1.4575
PAC002_U2OS_6H:BRD-K49294207-300-01-2:10	BRD-K49294207	BIBU-1361	U2OS	trt_cp	10 uM	6 h	2	252	0.48	0.351683	0	0	1	1	0	EGFR inhibitor	EGFR	-0.3769	0.8976	-1.4572
CPC014_PC3_6H:BRD-U33728988-000-01-6:10	BRD-U33728988	QL-X-138	PC3	trt_cp	10 uM	6 h	4	414	0.62	0.512303	1	1	1	1	0	MTOR inhibitor	BTK|JAK3|MKNK2|MTOR|PRKDC	-0.3766	0.8968	-1.4563
CPC017_SKB_24H:BRD-K07220430-001-03-6:10	BRD-K07220430	cinnarizine	SKB	trt_cp	10 uM	24 h	2	325	0.42	0.373591	0	0	1	1	0	Calcium channel blocker	HRH1	-0.3766	0.8968	-1.456
CPC013_SKB_24H:BRD-K24681473-004-01-4:10	BRD-K24681473	YM-155	SKB	trt_cp	10 uM	24 h	4	644	0.75	0.702755	0	0	1	1	0	Survivin inhibitor	BIRC5	-0.3765	0.8968	-1.4557
REP.A013_A375_24H:G01	BRD-K39974922	lenvatinib	A375	trt_cp	10 uM	24 h	3	202	0.5312	0.331234	0	0	1	1	0	FGFR inhibitor|KIT inhibitor|PDGFR inhibitor|VEGFR inhibitor	KDR|FLT4|FGFR1|FLT1|KIT|FGFR2|FGFR3|FGFR4|PDGFB|PDGFRB|RET	-0.3764	0.8968	-1.4556
REP.B021_HUVEC.A_24H:C08	BRD-K81458380	CX-4945	HUVEC	trt_cp	0.74 uM	24 h	2	187	0.3099	0.243423	0	0	1	1	0	Casein kinase inhibitor	CSNK2A1|CSNK2A2|CSNK2B|DAPK3|HIPK3	-0.3765	0.8968	-1.4556
REP.B013_HT29_24H:M22	BRD-K43457670	acetazolamide	HT29	trt_cp	0.08 uM	24 h	2	34	0.2322	0.0898465	0	0	1	1	0	Carbonic anhydrase inhibitor	CA14|CA2|CA1|CA4|CA12|CA7|CA13|CA6|AQP1|CA3	-0.3765	0.8968	-1.4556
CPC006_A375_6H:P19	BRD-K34581968	BMS-536924	A375	trt_cp	12 uM	6 h	5	452	0.5695	0.513035	1	1	1	1	0	IGF-1 inhibitor	IGF1R|INSR|AKT1|CCNE1|CDK2|CYP3A4|ERBB2|KDR|LCK|MAPK1|MET|PDGFRA|PDGFRB	-0.3764	0.8968	-1.4555
CPC002_HA1E_24H:BRD-K22010301-001-01-2:10	BRD-K22010301	JLK-6	HA1E	trt_cp	10 uM	24 h	3	286	0.51	0.386188	1	1	1	1	0	Gamma secretase inhibitor|Beta amyloid inhibitor	PSEN1	-0.3764	0.8968	-1.4552
LKCP002_U2OS_48H:O09	BRD-K33277808	ouabain	U2OS	trt_cp	0.12 uM	48 h	4	646	0.6973	0.678667	1	1	1	1	0	Na/K-ATPase inhibitor	ATP1A1|ATP1A2|ATP1A3|ATP1A4|ATP1B1|ATP1B2|ATP1B3|ATP1B4|FXYD2	-0.3763	0.8968	-1.4551
REP.A026_PC3_24H:P17	BRD-K91740057	felbinac	PC3	trt_cp	0.125 uM	24 h	2	81	0.1757	0.120631	0	0	1	1	0	Cyclooxygenase inhibitor	CTSL	-0.3763	0.8968	-1.4551
REP.A003_YAPC_24H:F01	BRD-A32269193	VGX-1027	YAPC	trt_cp	10 uM	24 h	3	87	0.162	0.120046	0	0	1	1	0	TNF inhibitor	TNF|TLR4	-0.3763	0.8968	-1.455
CPC006_HT29_6H:G21	BRD-A45889380	mepacrine	HT29	trt_cp	10 uM	6 h	5	510	0.5368	0.529081	1	1	1	1	0	NFKB inhibitor|Cytokine production inhibitor|p53 activator	TP53|AKT1|MTOR|NFKB1|PLA2G2A|PLA2G2D|PLA2G1B|PLA2G4A|PLA2G6|PLCL1	-0.3763	0.8968	-1.455
LIVB002_HUH7_72H:P13	BRD-K10670311	sulfasalazine	HUH7	trt_cp	8 uM	72 h	3	90	0.02	0.0429009	0	0	1	1	0	Antirheumatic drug|NFKB inhibitor	PTGS1|PTGS2|ALOX5|ACAT1|CHUK|IKBKB|PLA2G1B|PPARG|SLC46A1|SLC7A11|TBXAS1	-0.3762	0.8967	-1.4548
REP.A003_YAPC_24H:H24	BRD-K33453211	levocabastine	YAPC	trt_cp	0.04 uM	24 h	3	183	0.1425	0.163291	0	0	1	1	0	Histamine receptor antagonist	HRH1|NTSR2	-0.3762	0.8967	-1.4547
CPC014_A549_6H:BRD-K85985071-001-20-7:10	BRD-K85985071	ellipticine	A549	trt_cp	10 uM	6 h	3	288	0.59	0.416824	1	1	1	1	0	Topoisomerase inhibitor	TOP2A|TOP2B	-0.3762	0.8964	-1.4545
REP.A010_MCF7_24H:N22	BRD-K01638814	rilmenidine	MCF7	trt_cp	0.37 uM	24 h	3	78	0.321	0.160004	0	0	1	1	0	Adrenergic receptor agonist|Imidazoline receptor agonist	NISCH|ADRA2A	-0.3761	0.8937	-1.4541
CPC005_A375_6H:BRD-K59273480-001-01-5:10	BRD-K59273480	propentofylline	A375	trt_cp	10 uM	6 h	3	98	0.22	0.148476	1	0	1	1	0	Adenosine receptor antagonist|Phosphodiesterase inhibitor	ACHE|PDE1A	-0.3761	0.8937	-1.4541
CPC011_A549_24H:BRD-K71430621-001-02-3:10	BRD-K71430621	clobenpropit	A549	trt_cp	10 uM	24 h	3	378	0.49	0.435186	1	1	1	1	0	Histamine receptor antagonist	HRH3|HRH4|HRH1|HRH2	-0.376	0.8937	-1.4538
PBIOA015_HCC515_24H:O07	BRD-K08547377	irinotecan	HCC515	trt_cp	10 uM	24 h	3	626	0.7912	0.711641	1	1	1	1	0	Topoisomerase inhibitor	TOP1|CYP3A5|TOP1MT	-0.3759	0.8937	-1.4534
REP.A009_HUVEC.A_24H:B12	BRD-K26823213	GW-842166	HUVEC	trt_cp	0.04 uM	24 h	3	138	0.1943	0.165579	1	0	1	1	0	Cannabinoid receptor agonist	CNR2	-0.3758	0.8937	-1.4532
LIVB001_HUH7_72H:K08	BRD-K30577245	docetaxel	HUH7	trt_cp	4 uM	72 h	3	206	0.14	0.171723	0	0	1	1	0	Tubulin inhibitor	TUBB|BCL2|MAP2|MAP4|MAPT|NR1I2|TUBB1	-0.3757	0.8937	-1.4529
CPC012_SKB_24H:BRD-K74761218-001-03-5:10	BRD-K74761218	WT-171	SKB	trt_cp	10 uM	24 h	3	205	0.18	0.194242	0	0	1	1	0	HDAC inhibitor	HDAC6	-0.3758	0.8937	-1.4529
REP.A015_MCF10A_24H:O13	BRD-K61250553	loperamide	MCF10A	trt_cp	10 uM	24 h	3	113	0.2842	0.18121	1	0	1	1	0	Opioid receptor agonist	OPRM1|OPRD1|CYP2B6|CYP2C8|NPR2|CACNA1A|CALM1|OPRK1|POMC	-0.3757	0.8937	-1.4528
REP.B002_HT29_24H:B07	BRD-K15507868	tesaglitazar	HT29	trt_cp	2.22 uM	24 h	2	161	0.298	0.221489	0	0	1	1	0	Insulin sensitizer|PPAR receptor agonist	PPARA|PPARG|INS	-0.3756	0.8937	-1.4524
NMH002_NEU_6H:BRD-A93255169-001-21-8:10	BRD-A93255169	thalidomide	NEU	trt_cp	10 uM	6 h	3	246	0.33	0.288108	0	0	1	1	0	TNF inhibitor	TNF|CRBN|CYP1A2|CYP2B6|CYP2C19|CYP3A5|FGFR2|NFKB1|ORM1|ORM2|PTGS2	-0.3756	0.8937	-1.4523
REP.A022_HEK293_24H:C15	BRD-K68532323	SB-743921	HEK293	trt_cp	1.11 uM	24 h	3	263	0.4554	0.349949	0	0	1	1	0	Kinesin inhibitor	KIF11	-0.3755	0.8934	-1.452
PBIOA019_PC3_24H:P01	BRD-K33425534	exemestane	PC3	trt_cp	10 uM	24 h	3	342	0.44	0.392256	1	1	1	1	0	Aromatase inhibitor	CYP19A1	-0.3755	0.8931	-1.4517
AICHI002_NALM6_24H:N09	BRD-K72414522	AZD-5438	NALM6	trt_cp	0.66 uM	24 h	3	359	0.64	0.484694	1	1	1	1	0	CDK inhibitor	CCNB1|CCNE1|CDK1|CDK2|KCNH2	-0.3754	0.8857	-1.4514
CPC001_HA1E_24H:BRD-K76064317-001-03-2:10	BRD-K76064317	BRD-K76064317	HA1E	trt_cp	10 uM	24 h	3	106	0.19	0.143503	1	0	1	1	0	FLT3 inhibitor	FLT3	-0.3753	0.885	-1.4513
CPC013_HCC515_6H:BRD-A25569250-001-01-7:10	BRD-A25569250	KI-16425	HCC515	trt_cp	10 uM	6 h	2	149	0.18	0.1656	0	0	1	1	0	Lysophosphatidic acid receptor antagonist	LPAR1|LPAR3	-0.3753	0.8845	-1.4512
PAC004_U2OS_6H:BRD-K02590140-001-01-2:10	BRD-K02590140	O-2050	U2OS	trt_cp	10 uM	6 h	2	168	0.38	0.255492	1	1	1	1	0	Cannabinoid receptor antagonist	CNR1	-0.3753	0.8831	-1.4511
CPC011_A375_6H:BRD-A39172021-001-05-3:10	BRD-A39172021	ampiroxicam	A375	trt_cp	10 uM	6 h	3	394	0.09	0.190414	1	0	1	1	0	Cyclooxygenase inhibitor	PTGS1|PTGS2	-0.3752	0.8759	-1.4509
LJP006_SKBR3_24H:J03	BRD-K72414522	AZD-5438	SKBR3	trt_cp	1.11 uM	24 h	3	229	0.61	0.377932	1	1	1	1	0	CDK inhibitor	CCNB1|CCNE1|CDK1|CDK2|KCNH2	-0.3752	0.8749	-1.4508
CPC014_SKB_24H:BRD-A74904029-001-05-7:10	BRD-A74904029	EI-231	SKB	trt_cp	10 uM	24 h	2	293	0.29	0.294756	0	0	1	1	0	Casein kinase inhibitor	CSNK2A1	-0.3752	0.8743	-1.4507
CPC016_NEU_24H:BRD-K95609758-001-01-1:10	BRD-K95609758	BMS-191011	NEU	trt_cp	10 uM	24 h	3	96	0.25	0.156652	0	0	1	1	0	Potassium channel activator	KCNMA1	-0.3751	0.8738	-1.4504
CPC018_PHH_24H:BRD-A29082194-001-02-4:10	BRD-A29082194	gitoxigenin	PHH	trt_cp	10 uM	24 h	3	138	0.26	0.191539	0	0	1	1	0	Na/K-ATPase inhibitor	ATP1A1	-0.3751	0.8724	-1.4503
REP.B023_A549_24H:A18	BRD-K67966701	lisinopril	A549	trt_cp	0.01 uM	24 h	2	130	0.1451	0.138879	1	0	1	1	0	ACE inhibitor	ACE|ACE2	-0.3751	0.8726	-1.4503
CPC001_HCC515_24H:BRD-K67860401-001-01-5:10	BRD-K67860401	AR-A014418	HCC515	trt_cp	10 uM	24 h	3	597	0.81	0.70317	1	1	1	1	0	GSK inhibitor	GSK3B	-0.3751	0.8701	-1.4502
REP.A028_HT29_24H:P03	BRD-K97399794	quercetin	HT29	trt_cp	1.11 uM	24 h	2	335	0.5783	0.445071	0	0	1	1	0	Polar auxin transport inhibitor	PIK3CG|AKR1B1|CYP2C8|EGFR|GAA|MAOA|PTPN1|SCN5A|SIRT1|XDH|ATP5A1|ATP5B|ATP5C1|HCK|HIBCH|PIM1|STK17B|UGT3A1	-0.3751	0.8705	-1.4502
CPC006_H1299_6H:BRD-K92241597-001-02-9:80	BRD-K92241597	tosedostat	H1299	trt_cp	80 uM	6 h	2	126	0.3	0.196597	0	0	1	1	0	Peptidase inhibitor	ANPEP|NPEPPS|LAP3	-0.375	0.8684	-1.4501
POL001_HT29_24H:I20	BRD-K04853698	LDN-193189	HT29	trt_cp	3.33 uM	24 h	2	306	0.58	0.425996	1	1	1	1	0	Serine/threonine kinase inhibitor	ACVR1|BMPR1A	-0.375	0.8693	-1.4501
CPC016_HEPG2_6H:BRD-A85587465-001-02-5:10	BRD-A85587465	bemesetron	HEPG2	trt_cp	10 uM	6 h	3	98	0.03	0.0548282	1	0	1	1	0	Serotonin receptor antagonist	HTR3A|HTR3B	-0.375	0.8683	-1.45
CPC017_ASC_24H:BRD-A80502530-001-01-2:10	BRD-A80502530	cinobufagin	ASC	trt_cp	10 uM	24 h	4	556	0.76	0.657317	1	1	1	1	0	Na/K-ATPase inhibitor	ATP1A1	-0.3749	0.8624	-1.4497
CPC018_A375_6H:BRD-A36267905-003-12-7:10	BRD-A36267905	buphenine	A375	trt_cp	10 uM	6 h	5	194	0.28	0.235673	0	0	1	1	0	Adrenergic receptor agonist	ADRB2	-0.3749	0.8632	-1.4497
REP.A006_YAPC_24H:J02	BRD-K21548250	moracizine	YAPC	trt_cp	3.33 uM	24 h	3	104	0.1471	0.12507	1	1	1	1	0	Sodium channel inhibitor	SCN5A	-0.3749	0.8604	-1.4495
REP.B004_HT29_24H:E20	BRD-K21450440	benzthiazide	HT29	trt_cp	0.74 uM	24 h	2	117	0.0376	0.0670683	0	0	1	1	0	Carbonic anhydrase inhibitor	CA2|SLC12A3|CA1|CA12|CA4|CA9	-0.3749	0.8604	-1.4494
CPC017_A549_6H:BRD-K02590140-001-01-2:10	BRD-K02590140	O-2050	A549	trt_cp	10 uM	6 h	3	114	0.28	0.18066	1	1	1	1	0	Cannabinoid receptor antagonist	CNR1	-0.3749	0.8604	-1.4494
CPC016_NPC_24H:BRD-K56047318-001-03-0:10	BRD-K56047318	RHC-80267	NPC	trt_cp	10 uM	24 h	4	273	0.41	0.338301	0	0	1	1	0	Triacylglycerol lipase inhibitor	LIPC|LIPE|LIPG|DAGLA|DAGLB	-0.3747	0.8604	-1.449
REP.A017_HT29_24H:F03	BRD-K62363391	dapsone	HT29	trt_cp	1.11 uM	24 h	3	68	0.1533	0.103242	1	1	1	1	0	Bacterial antifolate	DHFR	-0.3748	0.8604	-1.449
CPC017_SKB_24H:BRD-K62289640-003-01-9:10	BRD-K62289640	lylamine	SKB	trt_cp	10 uM	24 h	2	135	0.43	0.243631	0	0	1	1	0	Cannabinoid receptor agonist	CNR1	-0.3747	0.8604	-1.4489
REP.B027_PC3_24H:F01	BRD-A94543220	bifonazole	PC3	trt_cp	2.22 uM	24 h	2	188	0.4651	0.299008	1	1	1	1	0	Sterol demethylase inhibitor	CYP2B6	-0.3747	0.8604	-1.4488
CPC015_ASC_24H:BRD-K01815685-001-07-2:10	BRD-K01815685	BRD-K01815685	ASC	trt_cp	10 uM	24 h	4	275	0.18	0.224974	0	0	1	1	0	Aryl hydrocarbon receptor agonist|Indoleamine 2,3-dioxygenase inhibitor	AHR|IDO1	-0.3747	0.8604	-1.4487
CPC005_HA1E_24H:BRD-A53077924-236-01-4:10	BRD-A53077924	tianeptine	HA1E	trt_cp	10 uM	24 h	3	219	0.31	0.263471	1	1	1	1	0	Selective serotonin reuptake inhibitor (SSRI)	SLC6A4|OPRD1|OPRK1|OPRM1	-0.3747	0.8604	-1.4487
REP.B020_HA1E_24H:M01	BRD-K47000838	BRD-K47000838	HA1E	trt_cp	1.11 uM	24 h	2	523	0.7352	0.627024	1	1	1	1	0	Tubulin inhibitor	ACTB	-0.3747	0.8604	-1.4487
REP.B010_HT29_24H:J24	BRD-A14262390	guanadrel	HT29	trt_cp	0.01 uM	24 h	2	174	0.1701	0.173963	1	0	1	1	0	Adrenergic receptor antagonist	SLC6A2	-0.3746	0.8604	-1.4485
REP.A025_A549_24H:D03	BRD-A90799790	isradipine	A549	trt_cp	1.11 uM	24 h	2	87	0.1723	0.123803	0	0	1	1	0	Calcium channel blocker	CACNA1C|CACNA1D|CACNA1F|CACNA1S|CACNA2D1|CACNA1H|CACNA2D2|CACNB2	-0.3745	0.8604	-1.4479
CPC001_HA1E_6H:BRD-A89672324-001-02-2:10	BRD-A89672324	CGP-55845	HA1E	trt_cp	10 uM	6 h	3	166	0.11	0.136641	1	0	1	1	0	GABA receptor antagonist	GABBR1|GABBR2|KCTD12|KCTD16|KCTD8	-0.3743	0.8604	-1.4474
CPC018_ASC_24H:BRD-K33204703-001-05-3:10	BRD-K33204703	AG-370	ASC	trt_cp	10 uM	24 h	3	282	0.22	0.251864	0	0	1	1	0	PDGFR inhibitor	PDGFRB	-0.3743	0.8604	-1.4472
CPC017_ASC_24H:BRD-K08252256-236-17-1:10	BRD-K08252256	diclofenac	ASC	trt_cp	10 uM	24 h	4	216	0.19	0.204849	0	0	1	1	0	Cyclooxygenase inhibitor	PTGS1|PTGS2|CYP2C8|AKR1C3|ALOX5|ASIC1|ASIC3|KCNQ2|KCNQ3|PLA2G2A|PPARG|SCN4A	-0.3743	0.8604	-1.4472
REP.A022_MDAMB231_24H:I16	BRD-K72222507	quinapril	MDAMB231	trt_cp	0.37 uM	24 h	3	188	0.1859	0.189038	0	0	1	1	0	ACE inhibitor	ACE	-0.3743	0.8604	-1.4472
CPC014_PC3_6H:BRD-K86465814-001-03-7:10	BRD-K86465814	HO-013	PC3	trt_cp	10 uM	6 h	4	112	0.22	0.158727	1	0	1	1	0	PPAR receptor agonist	PPARG	-0.3742	0.8603	-1.447
PBIOA021_HT29_24H:F24	BRD-K22024824	RG-4733	HT29	trt_cp	0.04 uM	24 h	3	159	0.24	0.197531	1	1	1	1	0	Gamma secretase inhibitor	NOTCH1|PSEN1	-0.3742	0.8603	-1.4469
CPC006_VCAP_6H:BRD-K11853856-003-01-3:10	BRD-K11853856	PJ-34	VCAP	trt_cp	10 uM	6 h	4	334	0.52	0.421411	1	1	1	1	0	PARP inhibitor	EEF2|PARP1|PARP15|PARP3	-0.3741	0.8597	-1.4466
MOAR016_HAP1.CDK4_24H:F03	BRD-K67537649	PQ-401	HAP1	trt_cp	3.33 uM	24 h	2	51	0.1557	0.0901073	1	1	1	1	0	IGF-1 inhibitor	IGF1R	-0.3741	0.8599	-1.4466
LJP005_HS578T_24H:G02	BRD-K04853698	LDN-193189	HS578T	trt_cp	3.33 uM	24 h	3	188	0.5	0.310023	1	1	1	1	0	Serine/threonine kinase inhibitor	ACVR1|BMPR1A	-0.3741	0.8597	-1.4465
REP.A014_HEK293_24H:P19	BRD-K41731458	triclosan	HEK293	trt_cp	10 uM	24 h	3	559	0.6758	0.621506	0	0	1	1	0	Enoyl-[acyl-carrier-protein] reductase [NADH] inhibitor	DNMT1	-0.374	0.8567	-1.4461
CPC014_NPC_24H:BRD-K83794624-001-01-7:10	BRD-K83794624	pirarubicin	NPC	trt_cp	10 uM	24 h	3	713	0.76	0.744358	0	0	1	1	0	Topoisomerase inhibitor	TOP2A	-0.374	0.8564	-1.446
CPC011_A549_6H:BRD-M47793593-001-04-3:10	BRD-M47793593	picrotoxin	A549	trt_cp	10 uM	6 h	3	70	0.05	0.0598225	1	0	1	1	0	GABA receptor antagonist	GABRA1|GABRR1|GLRA2|GLRA3	-0.3739	0.8562	-1.4459
REP.B012_MCF10A_24H:H21	BRD-K01815685	BRD-K01815685	MCF10A	trt_cp	0.25 uM	24 h	2	37	0.1618	0.0782385	1	1	1	1	0	Aryl hydrocarbon receptor agonist|Indoleamine 2,3-dioxygenase inhibitor	AHR|IDO1	-0.3739	0.8562	-1.4459
CPC003_VCAP_6H:BRD-A17411484-001-05-1:10	BRD-A17411484	carprofen	VCAP	trt_cp	10 uM	6 h	5	154	0.06	0.0972001	1	0	1	1	0	Cyclooxygenase inhibitor	PTGS2|PTGS1	-0.3739	0.8563	-1.4459
LJP008_HUVEC.A_24H:A07	BRD-K87142802	veliparib	HUVEC	trt_cp	10 uM	24 h	2	97	0.3329	0.181708	1	1	1	1	0	PARP inhibitor	PARP1|PARP2	-0.374	0.8563	-1.4459
CPC012_PHH_24H:BRD-K02130563-001-06-4:10	BRD-K02130563	panobinostat	PHH	trt_cp	10 uM	24 h	3	362	0.48	0.421508	0	0	1	1	0	HDAC inhibitor	HDAC1|HDAC2|HDAC3|HDAC4|HDAC6|HDAC7|HDAC8|HDAC9	-0.3739	0.8561	-1.4458
CPC016_ASC_24H:BRD-K18909381-001-01-4:10	BRD-K18909381	CGS-12066B	ASC	trt_cp	10 uM	24 h	3	110	0.26	0.171007	0	0	1	1	0	Serotonin receptor agonist	HTR1B	-0.3739	0.8559	-1.4457
REP.A002_A375_24H:B19	BRD-K15916496	clotrimazole	A375	trt_cp	10 uM	24 h	3	167	0.3368	0.239814	1	1	1	1	0	Cytochrome P450 inhibitor|Imidazoline ligand	KCNN4|CYP51A1|CYP3A4|NR1I2|NR1I3|TRPM2|TRPM4|TRPM8	-0.3739	0.8559	-1.4457
CPC006_A549_6H:BRD-K66874953-004-02-1:69.83	BRD-K66874953	pifithrin-alpha	A549	trt_cp	70 uM	6 h	4	96	0.19	0.136566	1	1	1	1	0	p53 inhibitor	TP53	-0.3739	0.8557	-1.4456
CPC016_HEPG2_6H:BRD-A10420615-001-03-6:10	BRD-A10420615	cyclopiazonic-acid	HEPG2	trt_cp	10 uM	6 h	3	174	0.42	0.273357	1	1	1	1	0	ATPase inhibitor	ATP2A1	-0.3738	0.8554	-1.4454
CPC004_A375_6H:BRD-A41995253-001-03-7:10	BRD-A41995253	brucine	A375	trt_cp	10 uM	6 h	3	287	0.13	0.195318	1	0	1	1	0	Glycine receptor antagonist	CHRM1|CHRM2|CHRM3|CHRM4|CHRM5	-0.3738	0.8551	-1.4452
CPC015_ASC_24H:BRD-K90333595-003-14-9:10	BRD-K90333595	phentolamine	ASC	trt_cp	10 uM	24 h	4	107	0.13	0.11926	0	0	1	1	0	Adrenergic receptor antagonist	ADRA1A|ADRA2A|ADRA1B|ADRA1D|ADRA2B|ADRA2C	-0.3737	0.8547	-1.4451
CPC016_SKB_24H:BRD-K93258693-001-05-8:10	BRD-K93258693	GW-9662	SKB	trt_cp	10 uM	24 h	3	207	0.24	0.225383	1	0	1	1	0	PPAR receptor antagonist	PPARG|NCOA2|RXRA	-0.3737	0.8542	-1.445
CPC018_A375_6H:BRD-A78322124-003-06-6:10	BRD-A78322124	dobutamine	A375	trt_cp	10 uM	6 h	5	203	0.2	0.203748	0	0	1	1	0	Adrenergic receptor agonist	ADRB1|ADRB2|ADRA1A	-0.3737	0.8543	-1.445
CPC006_AGS_6H:BRD-A17883755-001-02-0:177.6	BRD-A17883755	lenalidomide	AGS	trt_cp	200 uM	6 h	2	62	0.14	0.0942086	1	0	1	1	0	Carcinogen	CRBN|TNF|CDH5|PTGS2|TNFSF11	-0.3737	0.8541	-1.4449
CPC014_PHH_24H:BRD-K43797669-001-13-0:10	BRD-K43797669	genistein	PHH	trt_cp	10 uM	24 h	4	230	0.26	0.247276	0	0	1	1	0	Tyrosine kinase inhibitor	CFTR|ESR2|EGFR|ESR1|ESRRA|ESRRB|ESRRG|NCOA1|NCOA2|PPARG|PTK2B|TOP2A|TRPC5	-0.3737	0.8536	-1.4448
REP.A016_HA1E_24H:I07	BRD-K53963539	vortioxetine	HA1E	trt_cp	10 uM	24 h	3	596	0.7577	0.67952	1	1	1	1	0	Serotonin receptor agonist|Serotonin receptor antagonist	HTR1A|HTR1B|HTR7|SLC6A4|HTR1D|CYP2B6|CYP2C19|CYP2C8|CYP3A5|HTR2A|HTR2C|HTR3A|HTR5A|HTR6	-0.3736	0.8528	-1.4446
CPC018_ASC_24H:BRD-A14395271-001-01-5:10	BRD-A14395271	mesoridazine	ASC	trt_cp	10 uM	24 h	2	155	0.15	0.154185	0	0	1	1	0	Dopamine receptor antagonist	DRD2|HTR2A	-0.3736	0.8528	-1.4446
CPC015_ASC_24H:BRD-K46937689-001-08-5:10	BRD-K46937689	phenazone	ASC	trt_cp	10 uM	24 h	4	291	0.14	0.204099	0	0	1	1	0	Cyclooxygenase inhibitor	PTGS1|PTGS2	-0.3736	0.8527	-1.4445
CPC014_HCC515_6H:BRD-K29582115-311-02-0:10	BRD-K29582115	ziprasidone	HCC515	trt_cp	10 uM	6 h	3	449	0.49	0.474299	0	0	1	1	0	Dopamine receptor antagonist|Serotonin receptor antagonist	DRD2|HTR2A|HTR1A|HTR1D|HRH1|HTR1B|HTR1E|HTR2C|HTR7|ADRA1A|ADRA1B|ADRA2A|ADRA2B|ADRA2C|CHRM1|CHRM2|CHRM3|CHRM4|CHRM5|DRD1|DRD3|DRD4|DRD5|HTR3A|HTR6|SLC6A4	-0.3736	0.8523	-1.4444
CPC006_HT29_24H:BRD-K91623615-001-01-9:10	BRD-K91623615	ABT-751	HT29	trt_cp	10 uM	24 h	4	459	0.71	0.577253	1	1	1	1	0	Tubulin inhibitor	TUBB	-0.3735	0.8518	-1.4442
CPC018_SKB_24H:BRD-K36055864-001-09-3:10	BRD-K36055864	cycloheximide	SKB	trt_cp	10 uM	24 h	3	267	0.52	0.37678	0	0	1	1	0	Protein synthesis inhibitor	GSK3B|RPL3	-0.3735	0.8511	-1.444
CPC013_ASC_24H:BRD-K13390322-001-01-4:10	BRD-K13390322	AT-7519	ASC	trt_cp	10 uM	24 h	3	607	0.7	0.659134	0	0	1	1	0	CDK inhibitor|Cell cycle inhibitor	CDK2|CDK1|CDK9|CDK4|CDK5|CDK6	-0.3734	0.8506	-1.4439
REP.A024_MCF10A_24H:B18	BRD-A20239487	BRD-A20239487	MCF10A	trt_cp	0.04 uM	24 h	3	54	0.2476	0.116924	1	0	1	1	0	Adrenergic receptor antagonist	ADRB1|ADRB2	-0.3734	0.8506	-1.4438
LIVB001_HUH7_72H:D17	BRD-K26521938	dinoprostone	HUH7	trt_cp	10 uM	72 h	3	92	0.05	0.0685819	0	0	1	1	0	Prostanoid receptor agonist	PTGER2|PTGER1|PTGER3|PTGER4|CATSPER1|CATSPER2|CATSPER3|CATSPER4|PTGDR|PTGDR2|PTGFR|TBXA2R	-0.3734	0.8501	-1.4437
REP.A009_A375_24H:C09	BRD-K28822270	resminostat	A375	trt_cp	1.11 uM	24 h	3	204	0.4231	0.297076	0	0	1	1	0	HDAC inhibitor	HDAC1|HDAC2|HDAC3|HDAC6|HDAC8	-0.3733	0.8494	-1.4435
NMH001_FIBRNPC_24H:BRD-K25075681-001-01-2:10	BRD-K25075681	SR-48692	NPC	trt_cp	10 uM	24 h	2	249	0.36	0.302748	0	0	1	1	0	Neurotensin receptor antagonist	NTSR1|NTSR2	-0.3733	0.8488	-1.4434
CPC015_ASC_24H:BRD-A01593789-001-02-3:10	BRD-A01593789	BRD-A01593789	ASC	trt_cp	10 uM	24 h	4	208	0.14	0.172554	0	0	1	1	0	5-alpha reductase inhibitor	PGR	-0.3733	0.8491	-1.4434
CRCGN007_A549_24H:BRD-K58685305:0.0823045	BRD-K58685305	emodin	A549	trt_cp	0.08 uM	24 h	2	217	0.47	0.322931	1	1	1	1	0	11-beta-HSD1 inhibitor	CSNK2A1|CSNK2A2|CSNK2B|IL6|PTP4A3	-0.3732	0.8478	-1.4432
REP.A022_MDAMB231_24H:P24	BRD-K82746043	navitoclax	MDAMB231	trt_cp	0.04 uM	24 h	3	237	0.299	0.269178	0	0	1	1	0	BCL inhibitor	BCL2|BCL2L1|BCL2L2	-0.3732	0.8464	-1.4429
CPC017_ASC_24H:BRD-A71262238-001-04-3:10	BRD-A71262238	nafadotride	ASC	trt_cp	10 uM	24 h	4	534	0.15	0.286185	1	0	1	1	0	Dopamine receptor antagonist	DRD3|DRD2|HTR1A	-0.3731	0.846	-1.4428
AICHI001_KMS34_24H:K24	BRD-K66175015	afatinib	KMS34	trt_cp	0.01 uM	24 h	3	93	0.17	0.127144	1	0	1	1	0	EGFR inhibitor	EGFR|ERBB2|ERBB4	-0.3731	0.846	-1.4428
REP.A025_JURKAT_24H:O24	BRD-K73381542	phenylephrine	JURKAT	trt_cp	0.04 uM	24 h	2	103	0.2199	0.152181	0	0	1	1	0	Adrenergic receptor agonist	ADRA1A|ADRA1B|ADRA1D	-0.3732	0.8462	-1.4428
CPC015_SKB_24H:BRD-K39120595-304-03-9:10	BRD-K39120595	bithionol	SKB	trt_cp	10 uM	24 h	2	282	0.35	0.317679	0	0	1	1	0	Autotaxin inhibitor	ESR1|ESR2|MCL1	-0.3731	0.8458	-1.4426
REP.B008_HA1E_24H:H18	BRD-K76703230	YM-155	HA1E	trt_cp	0.01 uM	24 h	2	132	0.209	0.167954	1	1	1	1	0	Survivin inhibitor	BIRC5	-0.3731	0.8458	-1.4426
CPC006_HCC515_24H:F24	BRD-K73319509	PF-04217903	HCC515	trt_cp	40 uM	24 h	4	132	0.1467	0.140712	1	0	1	1	0	MET inhibitor	MET	-0.3731	0.8458	-1.4426
CPC018_NPC_24H:BRD-K91263825-001-03-6:10	BRD-K91263825	nortriptyline	NPC	trt_cp	10 uM	24 h	3	126	0.32	0.203044	0	0	1	1	0	Tricyclic antidepressant	KCNJ10|SLC6A2|SLC6A4|CYP2C19|PIK3CD|ADRA1A|ADRA1B|ADRA1D|ADRA2A|ADRA2B|ADRA2C|ADRB1|ADRB2|ADRB3|CHRM1|CHRM2|CHRM3|CHRM4|CHRM5|DRD2|HRH1|HTR1A|HTR2A|HTR2C|HTR6|PGRMC1|SIGMAR1	-0.3731	0.8458	-1.4426
NMH002_FIBRNPC_24H:BRD-K76723084-001-19-0:10	BRD-K76723084	isotretinoin	NPC	trt_cp	10 uM	24 h	3	141	0.44	0.251864	1	1	1	1	0	Retinoid receptor agonist	CYP2B6|CYP2C19|CYP2C8|CYP3A5|CYP3A7|RARA|RARB|RARG	-0.373	0.8456	-1.4424
REP.A020_HEK293_24H:F19	BRD-K86930074	cediranib	HEK293	trt_cp	10 uM	24 h	2	166	0.1491	0.159083	0	0	1	1	0	VEGFR inhibitor|KIT inhibitor	KDR|FLT1|FLT4|KIT|PDGFRB|CSF1R|FLT3|PDGFRA	-0.373	0.8453	-1.4423
MOAR002_A375_24H:P19	BRD-K40496271	eltrombopag	A375	trt_cp	10 uM	24 h	3	335	0.57	0.441866	1	1	1	1	0	Thrombopoietin receptor agonist	MPL|CYP2C8	-0.3729	0.8445	-1.4421
CPC015_ASC_24H:BRD-A68009927-003-02-9:10	BRD-A68009927	daunorubicin	ASC	trt_cp	10 uM	24 h	4	660	0.73	0.701882	0	0	1	1	0	RNA synthesis inhibitor|Topoisomerase inhibitor	TOP2A|TOP2B	-0.3729	0.8445	-1.4421
CPC006_AGS_6H:BRD-K17349619-003-01-4:10	BRD-K17349619	HLI-373	AGS	trt_cp	10 uM	6 h	2	68	0.34	0.153753	1	1	1	1	0	MDM inhibitor	MDM2	-0.373	0.8446	-1.4421
AICHI001_HBL1_24H:I02	BRD-A17883755	lenalidomide	HBL1	trt_cp	2.5 uM	24 h	3	153	0.34	0.23063	0	0	1	1	0	Carcinogen	CRBN|TNF|CDH5|PTGS2|TNFSF11	-0.373	0.8447	-1.4421
CPC016_A549_6H:BRD-K56047318-001-03-0:10	BRD-K56047318	RHC-80267	A549	trt_cp	10 uM	6 h	2	109	0.23	0.160106	0	0	1	1	0	Triacylglycerol lipase inhibitor	LIPC|LIPE|LIPG|DAGLA|DAGLB	-0.3729	0.8445	-1.442
PCL001_HEPG2_24H:BRD-K24821794:10	BRD-K24821794	SGC-CBP30	HEPG2	trt_cp	10 uM	24 h	3	142	0.23	0.182742	1	1	1	1	0	Bromodomain inhibitor	CREBBP|EP300	-0.3729	0.8445	-1.442
CPC015_SKB_24H:BRD-K92093830-003-05-0:10	BRD-K92093830	doxorubicin	SKB	trt_cp	10 uM	24 h	2	590	0.69	0.64518	0	0	1	1	0	Topoisomerase inhibitor	TOP2A	-0.3729	0.8445	-1.442
CPC016_A549_24H:BRD-K18909381-001-01-4:10	BRD-K18909381	CGS-12066B	A549	trt_cp	10 uM	24 h	3	108	0.12	0.115115	0	0	1	1	0	Serotonin receptor agonist	HTR1B	-0.3729	0.8441	-1.4419
REP.A015_THP1_24H:P15	BRD-K61397605	romidepsin	THP1	trt_cp	1.11 uM	24 h	2	625	0.8168	0.722484	0	0	1	1	0	HDAC inhibitor	HDAC1|HDAC2|CYP2B6|CYP2C19|CYP3A5|HDAC3|HDAC4|HDAC5|HDAC6|HDAC7|HDAC8|HDAC9	-0.3729	0.8441	-1.4418
ASG002_A549_24H:E02	BRD-K76674262	BRD-K76674262	A549	trt_cp	1.11 uM	24 h	3	297	0.613	0.431459	1	1	1	1	0	Protein synthesis inhibitor	RPL3	-0.3729	0.8437	-1.4417
CPC014_PHH_24H:BRD-K01253243-001-01-4:10	BRD-K01253243	SB-590885	PHH	trt_cp	10 uM	24 h	3	54	0.19	0.102425	0	0	1	1	0	RAF inhibitor	BRAF	-0.3728	0.8419	-1.4414
CPC020_MCF7_6H:BRD-K93568044-001-24-7:10	BRD-K93568044	hydrocortisone	MCF7	trt_cp	10 uM	6 h	4	216	0.09	0.140987	1	0	1	1	0	Glucocorticoid receptor agonist	NR3C1	-0.3727	0.8404	-1.4412
CPC006_SW480_6H:BRD-K06792661-001-01-9:10	BRD-K06792661	narciclasine	SW480	trt_cp	10 uM	6 h	2	345	0.25	0.296968	0	0	1	1	0	LIM kinase activator|Rho associated kinase activator	RHOA	-0.3726	0.8395	-1.4408
CPC005_PC3_6H:BRD-A62057054-001-01-5:10	BRD-A62057054	MDL-11939	PC3	trt_cp	10 uM	6 h	4	127	0.16	0.144143	1	0	1	1	0	Serotonin receptor antagonist	HTR2A|HTR2B|HTR2C	-0.3726	0.8395	-1.4408
LJP008_NPC.TAK_24H:K19	BRD-K88560311	rucaparib	NPC	trt_cp	10 uM	24 h	3	212	0.4242	0.303238	1	1	1	1	0	PARP inhibitor	PARP1|PARP2	-0.3726	0.8396	-1.4408
CPC004_HA1E_6H:BRD-K39746403-084-03-1:10	BRD-K39746403	erythromycin-estolate	HA1E	trt_cp	10 uM	6 h	3	79	0.18	0.120581	1	0	1	1	0	Bacterial 50S ribosomal subunit inhibitor	ABCB1|ALB|CYP3A4|CYP51A1|KCNH2|MLNR|SLC47A1	-0.3724	0.8391	-1.4399
REP.B016_HEK293_24H:B24	BRD-K51324732	meglitinide	HEK293	trt_cp	0.01 uM	24 h	2	230	0.1589	0.193311	0	0	1	1	0	Potassium channel antagonist	ABCC8|KCNJ11|CCR2	-0.3723	0.839	-1.4397
REP.B022_A549_24H:C07	BRD-K68164687	epothilone-b	A549	trt_cp	2.22 uM	24 h	2	253	0.3859	0.315957	0	0	1	1	0	Tubulin inhibitor	TUBB|TUBA1A|TUBA1B|TUBA1C|TUBA3C|TUBA4A|TUBA8|TUBB1|TUBB3|TUBB4A|TUBB4B	-0.3723	0.8389	-1.4396
REP.A016_JURKAT_24H:D13	BRD-A51820102	econazole	JURKAT	trt_cp	10 uM	24 h	2	146	0.1829	0.165239	1	1	1	1	0	Lanosterol demethylase inhibitor|Bacterial cell wall synthesis inhibitor|Sterol demethylase inhibitor	CYP51A1|NPY1R|NPY2R|TRPM2|TRPV5	-0.3723	0.8384	-1.4394
REP.A011_PC3_24H:A24	BRD-K04112579	nepafenac	PC3	trt_cp	0.04 uM	24 h	2	120	0.3446	0.205626	0	0	1	1	0	Cyclooxygenase inhibitor	PTGS2|PTGS1	-0.3722	0.836	-1.4393
REP.B002_HA1E_24H:H03	BRD-K16757695	PRX-08066	HA1E	trt_cp	0.25 uM	24 h	3	254	0.4917	0.357353	1	1	1	1	0	Serotonin receptor antagonist	HTR2B	-0.3722	0.8337	-1.439
REP.A017_MDAMB231_24H:P12	BRD-A65280694	molindone	MDAMB231	trt_cp	0.04 uM	24 h	3	113	0.1525	0.132741	0	0	1	1	0	Dopamine receptor antagonist	DRD2|HTR2A|DRD5|CHRM1|HRH1|HTR1A	-0.3721	0.8335	-1.4389
REP.A024_YAPC_24H:O14	BRD-K79595931	bavisant	YAPC	trt_cp	3.33 uM	24 h	3	119	0.2393	0.170638	1	1	1	1	0	Histamine receptor antagonist	HRH3	-0.3721	0.8333	-1.4388
CVD001_PHH_6H:BRD-K18787491-001-05-2:3.2852	BRD-K18787491	U-0126	PHH	trt_cp	3.33 uM	6 h	3	133	0.18	0.156456	0	0	1	1	0	MEK inhibitor	MAP2K1|MAP2K2|JAK2|AKT1|CHEK1|GSK3B|LCK|MAP2K7|MAPK1|MAPK11|MAPK12|MAPK14|MAPK8|PRKCA|RAF1|ROCK1|RPS6KB1|SGK1	-0.3721	0.8332	-1.4387
CPC014_VCAP_6H:BRD-K68174511-001-01-7:10	BRD-K68174511	torin-2	VCAP	trt_cp	10 uM	6 h	5	357	0.47	0.414203	0	0	1	1	0	MTOR inhibitor	MTOR	-0.3721	0.8332	-1.4387
MOAR007_A375_24H:B24	BRD-K20313525	rosmarinic-acid	A375	trt_cp	1.11 uM	24 h	3	115	0.11	0.11373	1	0	1	1	0	GABA receptor antagonist	MCL1|TYR	-0.3721	0.8332	-1.4387
CPC009_HCC515_6H:BRD-K30649484-015-07-3:10	BRD-K30649484	mafenide	HCC515	trt_cp	10 uM	6 h	3	114	0.11	0.113235	1	0	1	1	0	Carbonic anhydrase inhibitor	CA6|CA12|CA14|CA2|CA4|CA9	-0.372	0.8329	-1.4385
REP.B023_JURKAT_24H:B15	BRD-K67102207	phenylbutyrate	JURKAT	trt_cp	0.25 uM	24 h	2	62	0.0883	0.0748181	0	0	1	1	0	HDAC inhibitor	CYP3A5|HDAC1	-0.372	0.8321	-1.4382
MOAR006_A375_24H:C11	BRD-K31928526	barasertib	A375	trt_cp	3.33 uM	24 h	3	104	0.34	0.190146	1	1	1	1	0	Aurora kinase inhibitor	AURKB|AURKA	-0.3719	0.8294	-1.4378
CPC006_NCIH2073_6H:BRD-K17561142-003-16-8:10	BRD-K17561142	amiodarone	NCIH2073	trt_cp	10 uM	6 h	2	87	0.17	0.122974	0	0	1	1	0	Potassium channel antagonist	KCNH2|CHRM3|CYP2C8|SCN5A|ADRB1|CACNA1H|CACNA2D2|KCNA7	-0.3717	0.8268	-1.4374
REP.A002_HELA_24H:H13	BRD-K16803204	filgotinib	HELA	trt_cp	10 uM	24 h	3	189	0.4713	0.301794	1	1	1	1	0	JAK inhibitor	JAK1|JAK2|JAK3|TYK2	-0.3717	0.8268	-1.4374
LJP007_HA1E_24H:E09	BRD-K25340465	OSI-930	HA1E	trt_cp	1.11 uM	24 h	2	108	0.5218	0.240046	1	1	1	1	0	KIT inhibitor|VEGFR inhibitor	KIT|KDR|PDGFB|PDGFRB	-0.3716	0.8256	-1.4367
REP.A018_YAPC_24H:D01	BRD-K62562723	SR-2640	YAPC	trt_cp	10 uM	24 h	3	321	0.4992	0.404781	0	0	1	1	0	Leukotriene receptor antagonist	CYSLTR1	-0.3716	0.8256	-1.4367
CPC014_HEPG2_6H:BRD-K26674531-001-01-3:10	BRD-K26674531	GR-235	HEPG2	trt_cp	10 uM	6 h	3	137	0.09	0.112283	1	0	1	1	0	Estrogen receptor agonist|FXR antagonist|Progesterone receptor agonist	NR1H4|ESR1|IKBKB|NR1I2|PGR	-0.3714	0.8256	-1.4362
CPC017_ASC_24H:BRD-K65814004-003-01-1:10	BRD-K65814004	diphenyleneiodonium	ASC	trt_cp	10 uM	24 h	4	361	0.39	0.379417	0	0	1	1	0	Nitric oxide synthase inhibitor	ALDH1A2|ALDH2|ALDH5A1|ALDH7A1|NOX3|XDH|NOS2|NOS3	-0.3714	0.8256	-1.4361
CPC002_HA1E_6H:BRD-K80315159-051-01-2:10	BRD-K80315159	DPPE	HA1E	trt_cp	10 uM	6 h	3	166	0.08	0.116528	1	0	1	1	0	Histamine receptor antagonist	ABCB1|HRH1	-0.3714	0.8256	-1.436
REP.B014_HA1E_24H:P19	BRD-K41731458	triclosan	HA1E	trt_cp	2.22 uM	24 h	2	141	0.3483	0.224087	1	1	1	1	0	Enoyl-[acyl-carrier-protein] reductase [NADH] inhibitor	DNMT1	-0.3713	0.8256	-1.4358
REP.B022_HA1E_24H:K01	BRD-K73196317	urapidil	HA1E	trt_cp	2.22 uM	24 h	2	60	0.1676	0.101401	1	1	1	1	0	Adrenergic receptor antagonist	HTR1A	-0.3713	0.8256	-1.4356
CPC018_PHH_24H:BRD-K20313525-001-03-8:10	BRD-K20313525	rosmarinic-acid	PHH	trt_cp	10 uM	24 h	3	262	0.2	0.231471	0	0	1	1	0	GABA receptor antagonist	MCL1|TYR	-0.3713	0.8256	-1.4356
REP.A002_HT29_24H:P08	BRD-K18324993	budipine	HT29	trt_cp	3.33 uM	24 h	3	81	0.1241	0.101382	0	0	1	1	0	Glutamate receptor antagonist	GRIN1	-0.3713	0.8256	-1.4356
CPC006_HA1E_6H:BRD-K06792661-001-01-9:10	BRD-K06792661	narciclasine	HA1E	trt_cp	10 uM	6 h	5	650	0.83	0.742722	1	1	1	1	0	LIM kinase activator|Rho associated kinase activator	RHOA	-0.3712	0.8256	-1.4352
MOAR003_A375_24H:G22	BRD-K90948141	indiplon	A375	trt_cp	10 uM	24 h	3	87	0.2	0.133384	1	1	1	1	0	Benzodiazepine receptor agonist|GABA receptor agonist	GABRA1|GABRA2|GABRA3|GABRA5	-0.3711	0.8256	-1.435
CPC016_NEU_24H:BRD-K62996583-001-03-8:10	BRD-K62996583	lidoflazine	NEU	trt_cp	10 uM	24 h	3	102	0.04	0.0645893	0	0	1	1	0	Calcium channel blocker	SCN1A|SCN3A|SLC29A1	-0.371	0.8256	-1.4347
CPC017_ASC_24H:BRD-K86301799-001-19-9:10	BRD-K86301799	dipyridamole	ASC	trt_cp	10 uM	24 h	4	349	0.42	0.38714	0	0	1	1	0	Phosphodiesterase inhibitor	PDE5A|ADA|PDE10A|PDE4A|PDE7B|PDE8A|PDE8B|SLC29A1|PDE1A|PDE1B|PDE1C|PDE2A|PDE3A|PDE3B|PDE4B|PDE4C|PDE4D|PDE6A|PDE6B|PDE6C|PDE6D|PDE6G|PDE6H|PDE7A|PDE9A	-0.3711	0.8256	-1.4347
REP.A028_PC3_24H:E04	BRD-A93353767	isoconazole	PC3	trt_cp	0.37 uM	24 h	2	151	0.1603	0.157321	0	0	1	1	0	Fungal lanosterol demethylase inhibitor	CYP17A1	-0.371	0.8256	-1.4344
CPC018_A549_24H:BRD-K65285700-001-01-5:10	BRD-K65285700	GP-1a	A549	trt_cp	10 uM	24 h	2	229	0.09	0.145168	0	0	1	1	0	Cannabinoid receptor agonist	CNR2	-0.371	0.8256	-1.4344
CPC005_HT29_24H:BRD-K08973992-001-03-9:10	BRD-K08973992	linoleic-acid	HT29	trt_cp	10 uM	24 h	3	105	0.11	0.108673	1	0	1	1	0	Oxidizing agent	FABP4|FFAR1|FFAR4|HNF4A|KCNB1|PPARG|TRPM8	-0.371	0.8256	-1.4343
CPC004_PC3_6H:BRD-K19136521-001-03-0:10	BRD-K19136521	BRD-K19136521	PC3	trt_cp	10 uM	6 h	5	123	0.3	0.194242	1	1	1	1	0	CDK inhibitor|GSK inhibitor	CDK1|CDK2|CDK5|CCNE1|CDK4|CDK9|LCK|LRRK1|LRRK2|CDK5R1|GSK3B	-0.371	0.8256	-1.4343
REP.A023_PC3_24H:E01	BRD-K68867920	quetiapine	PC3	trt_cp	10 uM	24 h	3	197	0.3874	0.279347	1	1	1	1	0	Dopamine receptor antagonist|Serotonin receptor antagonist	DRD2|HTR1A|HTR2A|DRD1|HRH1|HTR1D|HTR1E|ADRA1A|ADRA1B|ADRA1D|ADRA2A|ADRA2B|ADRA2C|CHRM1|CHRM2|CHRM3|CHRM4|CHRM5|DRD3|DRD4|DRD5|HTR1B|HTR1F|HTR2C|HTR3A|HTR6|HTR7|SLC6A2	-0.3709	0.8255	-1.4342
CPC014_SKB_24H:BRD-K76723084-001-15-8:10	BRD-K76723084	isotretinoin	SKB	trt_cp	10 uM	24 h	4	363	0.4	0.385313	0	0	1	1	0	Retinoid receptor agonist	CYP2B6|CYP2C19|CYP2C8|CYP3A5|CYP3A7|RARA|RARB|RARG	-0.3708	0.8221	-1.4338
CPC017_HEPG2_6H:BRD-K82823804-001-01-7:10	BRD-K82823804	PD-407824	HEPG2	trt_cp	10 uM	6 h	3	366	0.5	0.43257	1	1	1	1	0	PKC inhibitor	WEE1	-0.3708	0.8203	-1.4337
REP.B009_THP1_24H:A23	BRD-K28307902	flutamide	THP1	trt_cp	0.03 uM	24 h	2	143	0.138	0.142049	0	0	1	1	0	Androgen receptor antagonist	AR|CYP2C19|AHR	-0.3708	0.8201	-1.4336
CPC006_U937_6H:BRD-K26657438-001-01-2:10	BRD-K26657438	imiquimod	U937	trt_cp	10 uM	6 h	2	47	0.22	0.102823	1	1	1	1	0	Interferon inducer|TLR agonist	TLR7|TLR8	-0.3707	0.8201	-1.4335
CPC004_HA1E_24H:BRD-K88741031-001-01-0:10	BRD-K88741031	BRD-K88741031	HA1E	trt_cp	10 uM	24 h	3	424	0.66	0.534916	1	1	1	1	0	Tyrosine kinase inhibitor|EGFR inhibitor	EGFR	-0.3707	0.8201	-1.4335
CPC018_PHH_24H:BRD-A93000692-001-05-7:10	BRD-A93000692	ciglitazone	PHH	trt_cp	10 uM	24 h	3	104	0.1	0.103121	0	0	1	1	0	PPAR receptor agonist	PPARG|INS	-0.3707	0.8201	-1.4333
PBIOA013_A375_24H:D01	BRD-K25325018	GSK-690693	A375	trt_cp	10 uM	24 h	3	437	0.64	0.534763	1	1	1	1	0	AKT inhibitor	AKT1|AKT2|AKT3|PAK4|PAK6|PAK7|PRKCQ|PRKG1|PRKX	-0.3706	0.8201	-1.4331
LJP009_MCF10A_24H:A22	BRD-A10523515	GSK-429286A	MCF10A	trt_cp	0.37 uM	24 h	2	75	0.3446	0.162562	1	1	1	1	0	Rho associated kinase inhibitor	ROCK1	-0.3706	0.8201	-1.4329
REP.A008_MCF7_24H:N16	BRD-K88789588	letrozole	MCF7	trt_cp	0.37 uM	24 h	3	76	0.1801	0.118303	0	0	1	1	0	Aromatase inhibitor	CYP19A1	-0.3706	0.8201	-1.4328
REP.B006_HA1E_24H:F24	BRD-K20079257	rufinamide	HA1E	trt_cp	0.01 uM	24 h	2	147	0.3247	0.220918	1	0	1	1	0	Voltage-gated sodium channel blocker	SCN1A|SCN3A|SCN9A|CYP2E1|CYP3A4|GRM5|SCN10A|SCN11A|SCN2A|SCN4A|SCN5A|SCN7A|SCN8A	-0.3706	0.8201	-1.4328
CPC014_A375_6H:B06	BRD-K63915849	AS-604850	A375	trt_cp	10 uM	6 h	2	61	0.2531	0.125644	1	1	1	1	0	PI3K inhibitor	PIK3CG|PIK3CA	-0.3705	0.8201	-1.4327
PAC001_U2OS_6H:BRD-K59339270-001-01-8:10	BRD-K59339270	AH-6809	U2OS	trt_cp	10 uM	6 h	2	27	0.07	0.0439604	0	0	1	1	0	Prostanoid receptor antagonist	PTGER1|PTGER2|PTGDR|PTGER3	-0.3705	0.8201	-1.4326
REP.A026_MCF7_24H:N06	BRD-A98845662	desvenlafaxine	MCF7	trt_cp	0.04 uM	24 h	2	106	0.168	0.134939	0	0	1	1	0	Serotonin receptor antagonist	SLC6A4|SLC6A2|SLC6A3	-0.3704	0.8201	-1.4324
CPC015_A549_24H:BRD-K73589491-001-05-4:10	BRD-K73589491	nizatidine	A549	trt_cp	10 uM	24 h	3	159	0.18	0.171067	0	0	1	1	0	Histamine receptor antagonist	HRH2	-0.3704	0.8201	-1.4323
PBIOA018_A549_24H:J07	BRD-K79239947	PF-573228	A549	trt_cp	10 uM	24 h	3	165	0.24	0.201223	1	1	1	1	0	Focal adhesion kinase inhibitor	CDK1|CDK2|CDK7|GSK3B|IKBKB	-0.3703	0.8201	-1.432
CPC004_HEPG2_6H:BRD-K04548931-003-05-8:10	BRD-K04548931	epirubicin	HEPG2	trt_cp	10 uM	6 h	3	380	0.54	0.458057	1	1	1	1	0	Topoisomerase inhibitor	TOP2A|CHD1	-0.3702	0.8201	-1.4316
CPC018_A549_6H:BRD-K14807180-001-01-7:10	BRD-K14807180	SB-221284	A549	trt_cp	10 uM	6 h	3	190	0.17	0.181732	1	0	1	1	0	Serotonin receptor antagonist	HTR2B|HTR2C|HTR2A	-0.3702	0.8201	-1.4316
REP.B026_JURKAT_24H:P21	BRD-A15931911	bucladesine	JURKAT	trt_cp	0.25 uM	24 h	2	201	0.1169	0.155001	0	0	1	1	0	Adenosine receptor agonist|CAMP stimulant	PRKACA	-0.3702	0.8201	-1.4315
CPC006_HA1E_24H:N03	BRD-A85860691	chaetocin	HA1E	trt_cp	0.08 uM	24 h	2	587	0.6478	0.623548	0	0	1	1	0	Histone lysine methyltransferase inhibitor	SUV39H1	-0.3701	0.8201	-1.4312
CPC006_NOMO1_6H:BRD-K15563106-001-08-1:177.6	BRD-K15563106	phloretin	NOMO1	trt_cp	200 uM	6 h	2	146	0.16	0.154549	1	0	1	1	0	Sodium channel inhibitor	AQP9|CLCN3|SLC23A1	-0.3701	0.8201	-1.4311
CPC006_NCIH2073_6H:BRD-K71799778-001-03-0:80	BRD-K71799778	BML-259	NCIH2073	trt_cp	80 uM	6 h	2	279	0.46	0.362253	0	0	1	1	0	CDK inhibitor	CDK2|CDK5	-0.3701	0.8201	-1.431
CPC012_A375_6H:G15	BRD-K49372556	mofezolac	A375	trt_cp	10 uM	6 h	4	218	0.0415	0.0961796	0	0	1	1	0	Cyclooxygenase inhibitor	PTGS1	-0.37	0.8201	-1.4306
NMH002_FIBRNPC_24H:BRD-K04923131-001-11-3:10	BRD-K04923131	BRD-K04923131	NPC	trt_cp	10 uM	24 h	3	284	0.55	0.399642	1	1	1	1	0	GSK inhibitor|Lipoxygenase inhibitor	GSK3B|ALOX5|GSK3A	-0.3699	0.8201	-1.4304
CPC009_HA1E_6H:BRD-K87024524-001-03-2:10	BRD-K87024524	phenelzine	HA1E	trt_cp	10 uM	6 h	3	153	0.25	0.197764	1	0	1	1	0	Monoamine oxidase inhibitor	MAOB|AOC3|MAOA|ABAT|GAD2|GPT|GPT2|SLC6A2|SLC6A3|SLC6A4	-0.3699	0.8201	-1.4303
REP.A028_HELA_24H:B20	BRD-K92613113	safinamide	HELA	trt_cp	3.33 uM	24 h	3	240	0.1483	0.190769	0	0	1	1	0	Dopamine receptor antagonist|Glutamate inhibitor|Monoamine oxidase inhibitor	MAOB|SLC6A3	-0.3699	0.8201	-1.4303
REP.B022_HT29_24H:M01	BRD-K68938568	GDC-0152	HT29	trt_cp	2.22 uM	24 h	2	109	0.1984	0.148701	1	1	1	1	0	XIAP inhibitor	BIRC2|BIRC3|BIRC7|XIAP	-0.3699	0.8201	-1.4302
CPC016_NPC_24H:BRD-A35588707-001-03-0:10	BRD-A35588707	teniposide	NPC	trt_cp	10 uM	24 h	3	612	0.73	0.675877	0	0	1	1	0	Topoisomerase inhibitor	TOP2A|CYP3A5|TOP2B	-0.3699	0.8201	-1.4301
REP.A020_HELA_24H:C05	BRD-A84174393	meloxicam	HELA	trt_cp	0.125 uM	24 h	3	429	0.4977	0.467243	0	0	1	1	0	Cyclooxygenase inhibitor	PTGS2|PTGS1	-0.3698	0.8199	-1.43
PBIOA017_HA1E_24H:M01	BRD-K67578145	GDC-0879	HA1E	trt_cp	10 uM	24 h	3	158	0.28	0.212686	1	1	1	1	0	RAF inhibitor	BRAF	-0.3697	0.8069	-1.4294
CPC002_VCAP_24H:BRD-K06147391-300-04-3:10	BRD-K06147391	telenzepine	VCAP	trt_cp	10 uM	24 h	3	73	0.2	0.122182	1	0	1	1	0	Acetylcholine receptor antagonist	CHRM1	-0.3697	0.8071	-1.4294
LJP001_HS578T_6H:BRD-K68174511-001-02-5:10	BRD-K68174511	torin-2	HS578T	trt_cp	10 uM	6 h	3	269	0.48	0.363352	0	0	1	1	0	MTOR inhibitor	MTOR	-0.3696	0.8069	-1.4293
CPC016_SKB_24H:BRD-K97440753-066-03-3:10	BRD-K97440753	BRD-K97440753	SKB	trt_cp	10 uM	24 h	3	316	0.25	0.284213	0	0	1	1	0	Adrenergic receptor antagonist|Prolactin inhibitor	HTR2A|ADRA1A|ADRB1|DRD1|DRD2|DRD3|DRD4|DRD5|HTR1A|HTR3A|HTR4|HTR5A|HTR6|HTR7	-0.3696	0.8067	-1.4292
CPC016_MCF7_24H:BRD-K61177364-003-01-1:10	BRD-K61177364	NBI-27914	MCF7	trt_cp	10 uM	24 h	4	92	0.08	0.08675	1	0	1	1	0	CRF receptor antagonist	CRHR1	-0.3695	0.8013	-1.4289
REP.B019_HA1E_24H:P24	BRD-K53508936	CTS-1027	HA1E	trt_cp	0.01 uM	24 h	2	224	0.4128	0.307485	1	1	1	1	0	Metalloproteinase inhibitor	MMP13|MMP2|MMP3|MMP9|MMP12|MMP14|MMP8|MMP1	-0.3696	0.8017	-1.4289
CPC020_A549_6H:BRD-K90027355-001-10-9:10	BRD-K90027355	spironolactone	A549	trt_cp	10 uM	6 h	2	70	0.23	0.128305	0	0	1	1	0	Mineralocorticoid receptor antagonist	NR3C2|KCNA5|KCND3|SCNN1A|AR|CACNA1A|CACNA1B|CACNA1C|CACNA1D|CACNA1F|CACNA1G|CACNA1H|CACNA1I|CACNA1S|CACNA2D1|CACNA2D2|CACNA2D3|CACNB1|CACNB2|CACNB3|CACNB4|CACNG1|CYP11B2|NR3C1|PGR|SHBG	-0.3695	0.8009	-1.4288
PAC001_U2OS_6H:BRD-K73381542-003-02-8:10	BRD-K73381542	phenylephrine	U2OS	trt_cp	10 uM	6 h	2	304	0.52	0.40204	0	0	1	1	0	Adrenergic receptor agonist	ADRA1A|ADRA1B|ADRA1D	-0.3695	0.8002	-1.4286
CPC006_U937_6H:BRD-A26711594-003-06-4:10	BRD-A26711594	nicardipine	U937	trt_cp	10 uM	6 h	2	206	0.34	0.267611	1	1	1	1	0	Calcium channel blocker	CACNA1C|ADORA3|ADRA1A|ADRA1B|ADRA1D|CACNA1D|CACNA2D1|CACNB2|CALM1|CHRM1|CHRM2|CHRM3|CHRM4|CHRM5|PDE1A|PDE1B	-0.3695	0.8001	-1.4285
LJP007_ASC.C_24H:M07	BRD-K99616396	motesanib	ASC	trt_cp	10 uM	24 h	3	79	0.2105	0.130398	1	1	1	1	0	KIT inhibitor|PDGFR inhibitor|VEGFR inhibitor	FLT1|FLT4|KDR|KIT|PDGFRA|RET	-0.3694	0.8	-1.4284
REP.A008_PC3_24H:D06	BRD-K36862742	hydroflumethiazide	PC3	trt_cp	0.04 uM	24 h	2	63	0.2252	0.120444	0	0	1	1	0	Sodium channel inhibitor	SLC12A1|ATP1A1|CA1|CA12|CA2|CA4|CA9|KCNMA1|SLC12A3	-0.3694	0.8	-1.4282
CPC017_SKB_24H:BRD-K76840893-003-01-7:10	BRD-K76840893	RS-17053	SKB	trt_cp	10 uM	24 h	2	151	0.13	0.141674	0	0	1	1	0	Adrenergic receptor antagonist	ADRA1A|ADRA1D	-0.3694	0.8	-1.4282
CPC014_HCC515_6H:BRD-K09436313-001-01-2:10	BRD-K09436313	prostaglandin	HCC515	trt_cp	10 uM	6 h	3	88	0.11	0.0994874	1	0	1	1	0	Prostanoid receptor antagonist	PTGDR2|PTGDR	-0.3692	0.7987	-1.4274
REP.A020_A375_24H:A07	BRD-K82522873	N-6022	A375	trt_cp	10 uM	24 h	3	193	0.3026	0.244368	0	0	1	1	0	Alcohol dehydrogenase inhibitor	ADH5	-0.369	0.7963	-1.4268
REP.B018_HELA_24H:B17	BRD-K62200014	anagrelide	HELA	trt_cp	0.03 uM	24 h	2	478	0.7979	0.62448	1	1	1	1	0	Phosphodiesterase inhibitor	PDE3A	-0.369	0.7963	-1.4267
CPC018_HEPG2_6H:BRD-K65786282-001-02-6:10	BRD-K65786282	CGP-7930	HEPG2	trt_cp	10 uM	6 h	3	84	0.07	0.0775388	1	0	1	1	0	GABA receptor antagonist|GABA receptor agonist	GABBR1	-0.369	0.7963	-1.4266
CPC015_ASC_24H:BRD-A41145729-001-02-7:10	BRD-A41145729	methoprene-acid	ASC	trt_cp	10 uM	24 h	4	262	0.3	0.283493	0	0	1	1	0	Retinoid receptor agonist	RXRA	-0.369	0.7963	-1.4266
REP.B010_HEK293_24H:B10	BRD-A11990600	lorazepam	HEK293	trt_cp	0.08 uM	24 h	2	64	0.066	0.0657192	0	0	1	1	0	Benzodiazepine receptor agonist	GABRA1|GABRA2|GABRA3|GABRA5|GABRA4|GABRA6|GABRB1|GABRB2|GABRB3|GABRD|GABRE|GABRG1|GABRG2|GABRG3|GABRP|GABRQ|TSPO	-0.3689	0.7963	-1.4265
CPD001_PC3_24H:BRD-K98174813-001-12-3:10	BRD-K98174813	chlorzoxazone	PC3	trt_cp	10 uM	24 h	3	224	0.03	0.0828925	1	0	1	1	0	Bacterial 30S ribosomal subunit inhibitor	KCNN4|KCNMA1	-0.3689	0.7963	-1.4265
CPC005_HT29_24H:BRD-A47494775-003-03-0:10	BRD-A47494775	dipivefrine	HT29	trt_cp	10 uM	24 h	3	121	0.15	0.136229	1	0	1	1	0	Adrenergic receptor agonist	ADRA1A|ACHE|ADRA2A|ADRB2|BCHE	-0.3689	0.7963	-1.4263
CPC014_HA1E_6H:BRD-K18135438-001-08-4:10	BRD-K18135438	BRD-K18135438	HA1E	trt_cp	10 uM	6 h	3	56	0.15	0.0926766	1	0	1	1	0	11-beta-HSD1 inhibitor|FXR agonist	HSD11B1|NR1H4	-0.3688	0.7958	-1.4258
REP.A027_A375_24H:P07	BRD-K97963946	EMD-1214063	A375	trt_cp	10 uM	24 h	3	328	0.4339	0.381472	0	0	1	1	0	HGF receptor inhibitor	MET	-0.3687	0.789	-1.4255
REP.A024_THP1_24H:B08	BRD-K73541271	etofenamate	THP1	trt_cp	3.33 uM	24 h	2	84	0.2406	0.143753	1	1	1	1	0	Cyclooxygenase inhibitor	PTGS1|PTGS2	-0.3686	0.7878	-1.4253
CPC004_HCC515_6H:BRD-A25687296-300-03-5:10	BRD-A25687296	emetine	HCC515	trt_cp	10 uM	6 h	3	524	0.78	0.646463	1	1	1	1	0	Protein synthesis inhibitor	RPS2	-0.3686	0.7881	-1.4253
CPC017_HEPG2_6H:BRD-K94176593-001-02-9:10	BRD-K94176593	TWS-119	HEPG2	trt_cp	10 uM	6 h	3	205	0.44	0.303692	1	1	1	1	0	GSK inhibitor	GSK3B|JUN|MYC	-0.3686	0.7887	-1.4253
CPC017_PHH_24H:BRD-K79930101-300-01-1:10	BRD-K79930101	GW-583340	PHH	trt_cp	10 uM	24 h	3	344	0.37	0.360754	0	0	1	1	0	Receptor tyrosine protein kinase inhibitor|EGFR inhibitor|ERBB2 inhibitor	EGFR|ERBB2	-0.3686	0.7845	-1.4251
REP.B005_A375_24H:M13	BRD-K11071038	ICI-162846	A375	trt_cp	2.22 uM	24 h	3	196	0.3692	0.272013	1	1	1	1	0	Histamine receptor antagonist	HRH2	-0.3685	0.7845	-1.4248
CPC006_HEPG2_6H:BRD-K73789395-001-06-5:102.71	BRD-K73789395	ZM-336372	HEPG2	trt_cp	100 uM	6 h	3	193	0.41	0.284447	1	1	1	1	0	RAF inhibitor	BRAF|LCK|MAPK14|RAF1	-0.3684	0.7845	-1.4247
CPC015_SKB_24H:BRD-A49447682-001-01-6:10	BRD-A49447682	BRD-A49447682	SKB	trt_cp	10 uM	24 h	2	150	0.45	0.262714	0	0	1	1	0	Glucocorticoid receptor agonist	NR3C1|PLA2G1B	-0.3685	0.7845	-1.4247
CPC013_HEPG2_6H:BRD-K68191783-001-01-2:10	BRD-K68191783	ALW-II-38-3	HEPG2	trt_cp	10 uM	6 h	3	389	0.47	0.432369	1	1	1	1	0	Ephrin inhibitor	DDR1	-0.3685	0.7845	-1.4247
CPC002_HCC515_24H:BRD-A78377521-001-03-0:10	BRD-A78377521	monastrol	HCC515	trt_cp	10 uM	24 h	3	121	0.32	0.198975	1	1	1	1	0	Kinesin inhibitor	KIF11	-0.3684	0.7845	-1.4246
REP.A009_HUVEC.A_24H:O12	BRD-A34255068	rolipram	HUVEC	trt_cp	0.04 uM	24 h	3	229	0.3419	0.282942	1	1	1	1	0	Phosphodiesterase inhibitor	PDE4A|PDE4B|PDE4D|PDE4C	-0.3684	0.7845	-1.4245
CPC003_HCC515_24H:BRD-K59632282-052-02-3:10	BRD-K59632282	quinidine	HCC515	trt_cp	10 uM	24 h	3	73	0.22	0.128145	1	1	1	1	0	Sodium channel inhibitor	SCN5A|ABCB1|CYP2D6|KCNA5|KCNA7|KCNH1|KCNH2|KCNH5|KCNK1|KCNK6|SLC29A4	-0.3684	0.7842	-1.4244
CPC006_NCIH2073_6H:BRD-K61250553-003-13-2:10	BRD-K61250553	loperamide	NCIH2073	trt_cp	10 uM	6 h	2	129	0.28	0.192178	0	0	1	1	0	Opioid receptor agonist	OPRM1|OPRD1|CYP2B6|CYP2C8|NPR2|CACNA1A|CALM1|OPRK1|POMC	-0.3684	0.7842	-1.4244
REP.A012_A375_24H:A16	BRD-K00152668	adarotene	A375	trt_cp	0.37 uM	24 h	2	617	0.7812	0.702028	0	0	1	1	0	Retinoid receptor agonist	RARG|RARA|RARB	-0.3684	0.7843	-1.4244
CPC010_A549_6H:BRD-K00234327-036-04-4:10	BRD-K00234327	RU-24969	A549	trt_cp	10 uM	6 h	2	69	0.08	0.0751277	1	1	1	1	0	Serotonin receptor agonist	HTR1A|HTR1B|HTR6|HTR1D|HTR2A|HTR2B|HTR2C|HTR5A	-0.3684	0.7843	-1.4244
AICHI002_TMD8_24H:C01	BRD-K15592317	CP-466722	TMD8	trt_cp	10 uM	24 h	3	200	0.4	0.286006	1	1	1	1	0	ATM kinase inhibitor	ATM	-0.3683	0.7839	-1.4243
REP.B011_YAPC_24H:A18	BRD-A03623303	metoprolol	YAPC	trt_cp	0.01 uM	24 h	2	129	0.3093	0.201983	0	0	1	1	0	Adrenergic receptor antagonist	ADRB1|ADRB2	-0.3684	0.7841	-1.4243
CPC005_MCF7_6H:H11	BRD-K48735772	PD-158780	MCF7	trt_cp	10 uM	6 h	4	117	0.2139	0.159966	1	1	1	1	0	EGFR inhibitor	EGFR	-0.3683	0.7837	-1.4242
NMH001_NEU_24H:BRD-K54704028-001-02-1:10	BRD-K54704028	BAY-36-7620	NEU	trt_cp	10 uM	24 h	3	138	0.31	0.209147	0	0	1	1	0	Glutamate receptor antagonist	GRM1	-0.3682	0.7777	-1.4235
CPC006_PC3_24H:G04	BRD-A46335897	promethazine	PC3	trt_cp	6.66 uM	24 h	5	105	0.2091	0.149831	1	0	1	1	0	Histamine receptor antagonist	HRH1|ADRA1A|CALM1|CHRM1|CHRM2|CHRM3|CHRM4|CHRM5|DRD2|HTR2A	-0.3681	0.777	-1.4234
CPC018_HEPG2_6H:BRD-K63606607-001-01-8:10	BRD-K63606607	bufalin	HEPG2	trt_cp	10 uM	6 h	3	216	0.4	0.297226	1	1	1	1	0	Na/K-ATPase inhibitor	ATP1A1	-0.3681	0.7764	-1.4233
CPC002_HCC515_24H:BRD-K19111024-001-08-4:10	BRD-K19111024	clofibric-acid	HCC515	trt_cp	10 uM	24 h	3	290	0.45	0.365288	1	1	1	1	0	PPAR receptor agonist	PPARA	-0.3681	0.7766	-1.4233
REP.A015_A549_24H:A12	BRD-A55579717	cytisine	A549	trt_cp	0.04 uM	24 h	3	155	0.2305	0.191131	0	0	1	1	0	Acetylcholine receptor agonist	CHRNA4|CHRNB2|CHRNA2|CHRNA3|CHRNA7|CHRNA6|CHRNB4	-0.3681	0.7763	-1.4232
CPC016_NPC_24H:BRD-K33396764-001-02-0:10	BRD-K33396764	BRD-K33396764	NPC	trt_cp	10 uM	24 h	3	84	0.13	0.105668	0	0	1	1	0	Omega 3 fatty acid stimulant	ELOVL4|FADS1|FADS2|FFAR1|FFAR4|PTGS2|SLC8A1|TRPV1	-0.368	0.7763	-1.4231
CPC004_HCC515_24H:BRD-K60274257-001-01-1:10	BRD-K60274257	dephostatin	HCC515	trt_cp	10 uM	24 h	2	210	0.31	0.258001	1	1	1	1	0	Tyrosine phosphatase inhibitor	PTPN1|PTPN6	-0.3681	0.7763	-1.4231
CPC016_SKB_24H:BRD-K33396764-001-02-0:10	BRD-K33396764	BRD-K33396764	SKB	trt_cp	10 uM	24 h	3	504	0.44	0.476181	0	0	1	1	0	Omega 3 fatty acid stimulant	ELOVL4|FADS1|FADS2|FFAR1|FFAR4|PTGS2|SLC8A1|TRPV1	-0.368	0.7763	-1.4228
CPC015_ASC_24H:BRD-K52662033-003-14-7:10	BRD-K52662033	lidocaine	ASC	trt_cp	10 uM	24 h	4	158	0.14	0.150391	0	0	1	1	0	Histamine receptor agonist	SCN5A|SCN10A|SCN9A|EGFR|SCN11A|SCN1A|SCN2A|SCN3A|SCN4A|SCN7A|SCN8A	-0.3679	0.7763	-1.4227
MUC.CP002_NKDBA_24H:F14	BRD-K67844266	MLN-4924	NKDBA	trt_cp	0.37 uM	24 h	5	430	0.6487	0.534056	0	0	1	1	0	Nedd activating enzyme inhibitor	NAE1|UBA3	-0.3679	0.7763	-1.4226
CPC015_ASC_24H:BRD-K93645900-001-04-8:10	BRD-K93645900	tadalafil	ASC	trt_cp	10 uM	24 h	4	448	0.22	0.317454	0	0	1	1	0	Phosphodiesterase inhibitor	PDE5A|PDE11A	-0.3679	0.7763	-1.4226
REP.B013_HT29_24H:F21	BRD-M39350793	reboxetine	HT29	trt_cp	0.25 uM	24 h	2	70	0.231	0.128584	0	0	1	1	0	Adrenergic receptor antagonist	SLC6A2	-0.3678	0.7763	-1.4222
NMH001_NEU_6H:H03	BRD-A95696066	nisoxetine	NEU	trt_cp	10 uM	6 h	3	169	0.1735	0.17315	0	0	1	1	0	Norepinephrine inhibitor	SLC6A2|SLC6A3|SLC6A4	-0.3677	0.7756	-1.4219
PBIOA014_HT29_24H:M02	BRD-K47983010	BX-795	HT29	trt_cp	3.33 uM	24 h	2	186	0.3579	0.260896	1	1	1	1	0	IKK inhibitor	PDPK1|IKBKE|TBK1|CDK2|CHEK1|GSK3B|KDR|PDK1	-0.3677	0.7757	-1.4219
CPC018_NPC_24H:BRD-K75478907-001-01-5:10	BRD-K75478907	GS-39783	NPC	trt_cp	10 uM	24 h	3	80	0.15	0.11077	0	0	1	1	0	GABA receptor antagonist	GABBR1	-0.3676	0.7744	-1.4215
CPC002_VCAP_24H:BRD-K25433859-003-14-8:10	BRD-K25433859	maprotiline	VCAP	trt_cp	10 uM	24 h	3	127	0.43	0.236302	1	1	1	1	0	Norepinephrine inhibitor|Tricyclic antidepressant	SLC6A2|ADRA1A|ADRA1B|ADRA1D|ADRA2A|ADRA2B|ADRA2C|CHRM1|CHRM2|CHRM3|CHRM4|CHRM5|DRD2|HRH1|HTR2A|HTR2C|HTR7	-0.3676	0.7744	-1.4214
CEGS001_NPC.215_24H:G02	BRD-K26818574	BIX-01294	NPC	trt_cp	4 uM	24 h	3	527	0.76	0.639945	1	1	1	1	0	DNA inhibitor|Histone lysine methyltransferase inhibitor	EHMT2|EHMT1	-0.3676	0.7744	-1.4214
LJP005_BT20_24H:D13	BRD-K79404599	enzastaurin	BT20	trt_cp	10 uM	24 h	3	224	0.42	0.310155	1	1	1	1	0	PKC inhibitor	PRKCB|AKT1|GSK3B|PRKCA|PRKCD|PRKCG	-0.3676	0.7744	-1.4212
CPC016_NPC_24H:BRD-K80778372-001-01-7:10	BRD-K80778372	Ro-19-4605	NPC	trt_cp	10 uM	24 h	4	122	0.08	0.0998977	0	0	1	1	0	GABA receptor agonist	GABRA1|GABRA2|GABRA3|GABRA5	-0.3675	0.7744	-1.4211
REP.B014_PC3_24H:E24	BRD-A59174698	ritodrine	PC3	trt_cp	0.01 uM	24 h	2	282	0.386	0.333617	1	1	1	1	0	Adrenergic receptor agonist	ADRB2	-0.3675	0.7744	-1.4211
MOAR007_PC3_24H:F03	BRD-K71350836	butalbital	PC3	trt_cp	1.11 uM	24 h	3	125	0.21	0.163831	1	1	1	1	0	GABA receptor antagonist	GABRA1|GABRA2|GABRA3|GABRA4|GABRA5|GABRA6|GABRB1|GABRB2|GABRB3|GABRD|GABRE|GABRG1|GABRG2|GABRG3|GABRP|GABRQ|CHRNA4|CHRNA7|GRIA2|GRIK2	-0.3675	0.7744	-1.421
REP.A027_MCF7_24H:F19	BRD-K95773607	darifenacin	MCF7	trt_cp	10 uM	24 h	2	97	0.0924	0.095731	0	0	1	1	0	Acetylcholine receptor antagonist	CHRM3|CHRM1|CHRM2|CHRM4|CHRM5	-0.3675	0.7744	-1.4209
NMH001_NEU_24H:BRD-K60690191-001-01-7:10	BRD-K60690191	MPEP	NEU	trt_cp	10 uM	24 h	3	277	0.4	0.336589	0	0	1	1	0	Glutamate receptor antagonist	GRM5|GRM1|GRM4	-0.3675	0.7744	-1.4209
MOAR003_A375_24H:M12	BRD-K39841531	TG-101209	A375	trt_cp	1.11 uM	24 h	3	391	0.6	0.489773	1	1	1	1	0	JAK inhibitor	JAK2|JAK3	-0.3674	0.7744	-1.4207
CPC014_NEU_24H:BRD-K84937637-001-03-2:10	BRD-K84937637	sirolimus	NEU	trt_cp	10 uM	24 h	2	127	0.18	0.152886	0	0	1	1	0	MTOR inhibitor	MTOR|FKBP1A|CCR5|FGF2	-0.3674	0.7744	-1.4207
REP.A026_HA1E_24H:F01	BRD-K89162000	tandutinib	HA1E	trt_cp	10 uM	24 h	2	326	0.5676	0.434971	0	0	1	1	0	FLT3 inhibitor|KIT inhibitor|PDGFR inhibitor	FLT3|KIT|PDGFRA|PDGFRB|CSF1R|PDGFD	-0.3674	0.7744	-1.4207
CPC004_HCC515_24H:BRD-K19136521-001-03-0:10	BRD-K19136521	BRD-K19136521	HCC515	trt_cp	10 uM	24 h	3	222	0.47	0.32663	1	1	1	1	0	CDK inhibitor|GSK inhibitor	CDK1|CDK2|CDK5|CCNE1|CDK4|CDK9|LCK|LRRK1|LRRK2|CDK5R1|GSK3B	-0.3674	0.7744	-1.4206
REP.B013_JURKAT_24H:O24	BRD-K44309363	dexniguldipine	JURKAT	trt_cp	0.01 uM	24 h	2	137	0.1862	0.161503	0	0	1	1	0	Calmodulin inhibitor	CALM1|PRKCA|ADORA3	-0.3674	0.7744	-1.4206
REP.A018_MDAMB231_24H:B08	BRD-A62071884	siguazodan	MDAMB231	trt_cp	3.33 uM	24 h	3	139	0.1309	0.136398	0	0	1	1	0	Phosphodiesterase inhibitor	PDE3A	-0.3673	0.7744	-1.4204
REP.A001_MCF7_24H:L11	BRD-A29260609	acebutolol	MCF7	trt_cp	0.125 uM	24 h	3	97	0.0768	0.0872764	0	0	1	1	0	Adrenergic receptor antagonist	ADRB1|ADRB2	-0.3673	0.7744	-1.4204
CPC017_ASC_24H:BRD-K12867552-001-01-3:10	BRD-K12867552	PCI-24781	ASC	trt_cp	10 uM	24 h	4	504	0.7	0.600613	1	1	1	1	0	HDAC inhibitor	HDAC1|HDAC2|HDAC3|HDAC6|HDAC10|HDAC8	-0.3673	0.7744	-1.4203
PAC003_U2OS_6H:BRD-K20714604-001-01-5:10	BRD-K20714604	RS-56812	U2OS	trt_cp	10 uM	6 h	2	135	0.21	0.170258	1	0	1	1	0	Serotonin receptor agonist	HTR3A	-0.3673	0.7744	-1.4202
CPC015_A375_6H:BRD-K76805682-001-05-0:10	BRD-K76805682	SB-415286	A375	trt_cp	10 uM	6 h	3	208	0.38	0.284285	1	1	1	1	0	GSK inhibitor	GSK3B|GSK3A|RPS6KB1	-0.3673	0.7744	-1.4201
CPC018_PHH_24H:BRD-K12932420-001-01-5:10	BRD-K12932420	YM-976	PHH	trt_cp	10 uM	24 h	3	162	0.41	0.260603	0	0	1	1	0	Phosphodiesterase inhibitor	PDE4A|PDE4B|PDE4C|PDE4D|TNF	-0.3673	0.7744	-1.4201
REP.A025_A375_24H:N01	BRD-K78118466	LY-2157299	A375	trt_cp	10 uM	24 h	3	244	0.439	0.330946	1	1	1	1	0	TGF-beta receptor inhibitor	TGFBR1	-0.3672	0.7744	-1.4199
LJP005_HA1E_24H:D13	BRD-K79404599	enzastaurin	HA1E	trt_cp	10 uM	24 h	3	257	0.51	0.366085	1	1	1	1	0	PKC inhibitor	PRKCB|AKT1|GSK3B|PRKCA|PRKCD|PRKCG	-0.3672	0.7744	-1.4199
LJP009_HUVEC_24H:L06	BRD-K70642949	GSK-2334470	HUVEC	trt_cp	0.04 uM	24 h	3	129	0.3268	0.207619	1	1	1	1	0	PDK inhibitor	PDPK1|AURKA|AURKB|PDK1	-0.3671	0.7742	-1.4196
LJP008_CD34_24H:J24	BRD-K89391146	RG-108	CD34	trt_cp	0.04 uM	24 h	3	172	0.3624	0.252458	1	1	1	1	0	DNA inhibitor	DNMT1|DNMT3B	-0.3671	0.7736	-1.4195
REP.A002_YAPC_24H:H07	BRD-K16762525	BRD-K16762525	YAPC	trt_cp	10 uM	24 h	2	98	0.0917	0.095858	0	0	1	1	0	Bacterial 50S ribosomal subunit inhibitor	CYP3A4|CYP2C19|CYP3A5|CYP3A7	-0.3671	0.7729	-1.4194
CPC006_NCIH2073_6H:BRD-A62182663-001-01-4:10	BRD-A62182663	YK-4279	NCIH2073	trt_cp	10 uM	6 h	2	78	0.05	0.0631485	0	0	1	1	0	Apoptosis stimulant|ETV1 inhibitor	EWSR1|FLI1|DHX9	-0.3671	0.7718	-1.4193
PAC005_U2OS_6H:BRD-A82396632-008-02-7:10	BRD-A82396632	miconazole	U2OS	trt_cp	10 uM	6 h	2	95	0.45	0.209073	1	1	1	1	0	Bacterial cell wall synthesis inhibitor	CYP19A1|KCNH2|KCNH6|KCNH7|KCNMA1|KCNMB1|KCNMB2|KCNMB3|KCNMB4|KCNN1|KCNN2|KCNN3|KCNN4|NOS2|NOS3|TRPM2|TRPV5	-0.367	0.7712	-1.4192
CPC006_U937_6H:BRD-K80527266-001-01-7:10	BRD-K80527266	triacsin-c	U937	trt_cp	10 uM	6 h	2	263	0.24	0.254047	1	1	1	1	0	Adrenergic receptor antagonist	ACSL1	-0.3669	0.7708	-1.4186
MOAR001_A375_24H:F01	BRD-K82164249	andarine	A375	trt_cp	10 uM	24 h	2	66	0.1855	0.111886	1	1	1	1	0	Androgen receptor antagonist	AR	-0.3669	0.7708	-1.4186
REP.B017_HELA_24H:D01	BRD-K44827188	vismodegib	HELA	trt_cp	2.22 uM	24 h	2	123	0.3114	0.197898	1	1	1	1	0	Hedgehog pathway inhibitor|Smoothened receptor antagonist	SMO|ABCB1|ABCG2|CYP2C19|CYP2C8|DHH|IHH|PTCH1	-0.3669	0.7708	-1.4186
ERG004_VCAP_24H:BRD-K11399644-003-03-0:30	BRD-K11399644	phenformin	VCAP	trt_cp	30 uM	24 h	4	82	0.33	0.166339	1	1	1	1	0	AMPK activator	KCNJ8|PRKAA1	-0.3668	0.7708	-1.4184
CPC012_NEU_24H:BRD-K68202742-001-06-6:10	BRD-K68202742	BRD-K68202742	NEU	trt_cp	10 uM	24 h	3	373	0.58	0.470326	0	0	1	1	0	HDAC inhibitor|CDK expression enhancer|ID1 expression inhibitor	HDAC1|HDAC3|HDAC4|HDAC6|HDAC7|HDAC8|HDAC10|HDAC2|HDAC5|HDAC9	-0.3667	0.7708	-1.4179
MOAR018_HAP1.TP53_24H:I21	BRD-K06749501	GSK-1838705A	HAP1	trt_cp	3.33 uM	24 h	3	58	0.2102	0.111651	1	1	1	1	0	IGF-1 inhibitor	IGF1R|ALK|INSR|RPS6KA1	-0.3667	0.7708	-1.4178
REP.A003_A375_24H:J19	BRD-K34154330	tracazolate	A375	trt_cp	10 uM	24 h	3	145	0.258	0.19558	1	1	1	1	0	GABA receptor antagonist	GABRA1	-0.3666	0.7708	-1.4177
REP.A003_HT29_24H:P13	BRD-K36627727	tamibarotene	HT29	trt_cp	10 uM	24 h	3	210	0.3455	0.272373	0	0	1	1	0	Retinoid receptor agonist	RARA|RARB	-0.3666	0.7708	-1.4176
CPC006_HCT116_6H:BRD-K74236984-001-01-4:10	BRD-K74236984	UNC-0321	HCT116	trt_cp	10 uM	6 h	2	62	0.15	0.0975151	1	0	1	1	0	Histone lysine methyltransferase inhibitor	EHMT2	-0.3666	0.7708	-1.4174
CPC016_NEU_24H:BRD-A97104540-004-08-5:10	BRD-A97104540	fenoterol	NEU	trt_cp	10 uM	24 h	3	185	0.15	0.168447	0	0	1	1	0	Adrenergic receptor agonist	ADRB2|ADRB1|ADRB3	-0.3665	0.7707	-1.4172
LJP009_HELA_24H:C01	BRD-K83972459	JWE-035	HELA	trt_cp	10 uM	24 h	3	311	0.6064	0.439127	1	1	1	1	0	Aurora kinase inhibitor	AURKA	-0.3665	0.7707	-1.4171
CPC015_ASC_24H:BRD-K15933101-001-01-6:10	BRD-K15933101	ropinirole	ASC	trt_cp	10 uM	24 h	3	287	0.25	0.270858	0	0	1	1	0	Dopamine receptor agonist	DRD2|DRD3|ADRA2A|ADRA2B|ADRA2C|DRD1|DRD4|DRD5|HTR1A|HTR1B|HTR1D|HTR2A|HTR2B|HTR2C	-0.3664	0.7655	-1.4166
REP.A019_HELA_24H:P20	BRD-K53508936	CTS-1027	HELA	trt_cp	3.33 uM	24 h	2	365	0.4333	0.402135	0	0	1	1	0	Metalloproteinase inhibitor	MMP13|MMP2|MMP3|MMP9|MMP12|MMP14|MMP8|MMP1	-0.3663	0.7655	-1.4165
REP.B012_HUVEC.A_24H:M23	BRD-K03194791	roflumilast	HUVEC	trt_cp	0.03 uM	24 h	2	147	0.1576	0.15391	0	0	1	1	0	Phosphodiesterase inhibitor	PDE4A|PDE4B|PDE4C|PDE4D|CYP2B6|CYP2C19	-0.3663	0.7655	-1.4164
CPC006_NCIH596_6H:BRD-K54256913-001-01-2:10	BRD-K54256913	MK-1775	NCIH596	trt_cp	10 uM	6 h	2	131	0.06	0.0896483	1	0	1	1	0	WEE1 kinase inhibitor	WEE1	-0.3663	0.7655	-1.4163
MOA001_U2OS_24H:C18	BRD-K78599730	manumycin-a	U2OS	trt_cp	3.33 uM	24 h	3	218	0.47	0.323674	1	1	1	1	0	Farnesyltransferase inhibitor|NFKB inhibitor	FNTA|IKBKB	-0.3663	0.7654	-1.4162
CPC015_HEPG2_6H:BRD-K37991163-003-06-8:10	BRD-K37991163	paroxetine	HEPG2	trt_cp	10 uM	6 h	2	189	0.32	0.248677	0	0	1	1	0	Selective serotonin reuptake inhibitor (SSRI)	SLC6A4|CHRM1|CHRM2|CHRM3|CHRM4|CHRM5|HTR2A|SLC6A2	-0.3662	0.7652	-1.4161
CPC005_HCC515_6H:BRD-K44084986-001-02-1:10	BRD-K44084986	Y-27632	HCC515	trt_cp	10 uM	6 h	2	166	0.22	0.19324	1	1	1	1	0	Rho associated kinase inhibitor	ROCK1|ROCK2|LRRK2|PKIA|PKN2|PRKACA|PRKCE	-0.3662	0.7653	-1.4161
REP.A003_YAPC_24H:E18	BRD-K32405725	etomoxir	YAPC	trt_cp	0.04 uM	24 h	3	126	0.1341	0.131441	0	0	1	1	0	Carnitine palmitoyltransferase inhibitor	CPT1A|CPT1B	-0.3662	0.7618	-1.4159
REP.A005_HT29_24H:P14	BRD-K11399644	phenformin	HT29	trt_cp	3.33 uM	24 h	3	79	0.1268	0.101205	0	0	1	1	0	AMPK activator	KCNJ8|PRKAA1	-0.3662	0.7613	-1.4158
CPC016_HT29_6H:BRD-A63546914-003-01-2:10	BRD-A63546914	Ro-04-5595	HT29	trt_cp	10 uM	6 h	5	118	0.11	0.115204	1	0	1	1	0	Glutamate receptor antagonist	GRIN2B	-0.3661	0.7602	-1.4155
LJP006_PC3_24H:I04	BRD-K49328571	dasatinib	PC3	trt_cp	0.37 uM	24 h	3	354	0.65	0.485053	1	1	1	1	0	KIT inhibitor|Bcr-Abl inhibitor|Ephrin inhibitor|PDGFR inhibitor|Src inhibitor|Tyrosine kinase inhibitor	ABL1|FYN|LCK|SRC|KIT|YES1|EPHA2|LYN|PDGFRB|BCR|BTK|DDR1|DDR2|PDGFRA|ABL2|BLK|FGR|FRK|HCK|SRMS|STAT5B	-0.3661	0.76	-1.4154
CPC011_HT29_6H:BRD-K41903098-003-07-5:10	BRD-K41903098	diphenoxylate	HT29	trt_cp	10 uM	6 h	4	76	0.06	0.0682831	0	0	1	1	0	Opioid receptor agonist	OPRM1	-0.366	0.7599	-1.4153
REP.A028_MCF7_24H:L19	BRD-A96292436	eflornithine	MCF7	trt_cp	10 uM	24 h	3	144	0.1552	0.151167	0	0	1	1	0	Ornithine decarboxylase inhibitor	ODC1|ARG2	-0.366	0.7595	-1.4151
CPC006_NOMO1_6H:BRD-K02407574-001-04-8:0.31	BRD-K02407574	parbendazole	NOMO1	trt_cp	0.3 uM	6 h	2	417	0.04	0.130596	0	0	1	1	0	Tubulin inhibitor	TUBB	-0.366	0.7596	-1.4151
LJP009_CD34_24H:E22	BRD-K44227013	ponatinib	CD34	trt_cp	0.37 uM	24 h	3	472	0.669	0.568218	0	0	1	1	0	Bcr-Abl inhibitor|FLT3 inhibitor|PDGFR inhibitor	ABL1|BCR|FLT3|RET|FGFR1|FGFR2|FGFR3|FGFR4|KIT|TEK|CYP2C8|CYP3A5|FGF2|FLT1|KDR|LCK|LYN|PDGFRA|SRC	-0.366	0.7596	-1.4151
REP.A022_HEK293_24H:I07	BRD-K71480163	GDC-0068	HEK293	trt_cp	10 uM	24 h	3	403	0.5965	0.495779	0	0	1	1	0	AKT inhibitor	AKT1|AKT2|AKT3|CYP3A5|PRKG1	-0.3659	0.7594	-1.415
LJP002_MDAMB231_24H:BRD-K53281329-001-01-9:10	BRD-K53281329	BAY-61-3606	MDAMB231	trt_cp	10 uM	24 h	3	288	0.47	0.372028	0	0	1	1	0	Syk inhibitor	SYK	-0.3659	0.7593	-1.4149
CPC020_HA1E_6H:BRD-A83892713-001-01-3:10	BRD-A83892713	rifampicin	HA1E	trt_cp	10 uM	6 h	3	159	0.07	0.106679	1	0	1	1	0	RNA polymerase inhibitor	NR1I2	-0.3659	0.759	-1.4147
CPC006_H1299_6H:BRD-K35960502-001-10-1:10	BRD-K35960502	niclosamide	H1299	trt_cp	10 uM	6 h	2	210	0.44	0.307374	0	0	1	1	0	DNA inhibitor|STAT inhibitor	STAT3	-0.3658	0.7585	-1.4144
REP.B009_YAPC_24H:F24	BRD-K29968218	KX-2391	YAPC	trt_cp	0.01 uM	24 h	2	158	0.3163	0.226052	0	0	1	1	0	Src inhibitor|Tubulin inhibitor	SRC	-0.3658	0.7585	-1.4144
CPC020_VCAP_6H:BRD-K02123250-001-01-8:10	BRD-K02123250	JNJ-38877605	VCAP	trt_cp	10 uM	6 h	5	118	0.15	0.134529	0	0	1	1	0	MET inhibitor	MET	-0.3658	0.7579	-1.4143
CPC003_VCAP_24H:BRD-A97674275-001-04-3:10	BRD-A97674275	ranolazine	VCAP	trt_cp	10 uM	24 h	2	162	0.12	0.140987	0	0	1	1	0	Sodium channel inhibitor	SCN5A|SCN9A|SLC22A2|SCN10A|SCN4A	-0.3657	0.7567	-1.4141
LJP009_JURKAT_24H:M01	BRD-K72703948	ZM-447439	JURKAT	trt_cp	10 uM	24 h	3	170	0.2626	0.21365	1	1	1	1	0	Aurora kinase inhibitor	AURKA|AURKB	-0.3657	0.7565	-1.414
REP.B018_HT29_24H:G11	BRD-A63752151	fidarestat	HT29	trt_cp	0.03 uM	24 h	2	62	0.1346	0.0923738	1	1	1	1	0	Aldose reductase inhibitor	AKR1B1	-0.3657	0.7564	-1.4139
CPC015_MCF7_6H:C24	BRD-K59753853	MDL-29951	MCF7	trt_cp	10 uM	6 h	5	252	0.238	0.247639	0	0	1	1	0	Glutamate receptor antagonist	FBP1|GPR17	-0.3657	0.7564	-1.4139
KHW001_U937_6H:BRD-K33240821-001-01-3:10	BRD-K33240821	plerixafor	U937	trt_cp	10 uM	6 h	6	106	0.16	0.131687	0	0	1	1	0	CC chemokine receptor antagonist	CXCR4|ACKR3|CCR4	-0.3656	0.7553	-1.4137
CPC005_VCAP_24H:BRD-A90799790-001-04-1:10	BRD-A90799790	isradipine	VCAP	trt_cp	10 uM	24 h	5	188	0.1	0.138647	0	0	1	1	0	Calcium channel blocker	CACNA1C|CACNA1D|CACNA1F|CACNA1S|CACNA2D1|CACNA1H|CACNA2D2|CACNB2	-0.3656	0.7507	-1.4135
CPC015_ASC_24H:BRD-A97701745-001-09-5:10	BRD-A97701745	pindolol	ASC	trt_cp	10 uM	24 h	4	193	0.16	0.177693	0	0	1	1	0	Adrenergic receptor antagonist	ADRB1|ADRB2|HTR1A|HTR1B|HTR2A|HTR2B	-0.3656	0.7508	-1.4135
LJP005_HS578T_24H:D13	BRD-K79404599	enzastaurin	HS578T	trt_cp	10 uM	24 h	3	254	0.52	0.367493	1	1	1	1	0	PKC inhibitor	PRKCB|AKT1|GSK3B|PRKCA|PRKCD|PRKCG	-0.3656	0.7509	-1.4135
CPC006_NCIH508_6H:BRD-K73397362-001-03-3:44.4	BRD-K73397362	purmorphamine	NCIH508	trt_cp	40 uM	6 h	2	95	0.13	0.112374	0	0	1	1	0	Smoothened receptor agonist	SMO|DHH|IHH|PTCH1	-0.3655	0.7507	-1.4134
CPC011_HT29_6H:BRD-K33312228-001-04-3:10	BRD-K33312228	halometasone	HT29	trt_cp	10 uM	6 h	4	304	0.3	0.305371	0	0	1	1	0	Glucocorticoid receptor agonist	NR3C1	-0.3655	0.7507	-1.4134
CPC016_ASC_24H:BRD-K20714604-003-01-1:10	BRD-K20714604	RS-56812	ASC	trt_cp	10 uM	24 h	3	400	0.16	0.255812	0	0	1	1	0	Serotonin receptor agonist	HTR3A	-0.3655	0.7507	-1.4133
MOAR001_PC3_24H:O24	BRD-K88807631	elacridar	PC3	trt_cp	1.11 uM	24 h	3	117	0.27	0.179724	1	1	1	1	0	P-glycoprotein inhibitor	ABCB1	-0.3655	0.7507	-1.4131
CPC017_A375_6H:BRD-K28806945-001-01-9:10	BRD-K28806945	L-750667	A375	trt_cp	10 uM	6 h	3	157	0.07	0.106006	0	0	1	1	0	Dopamine receptor antagonist	DRD4	-0.3654	0.7506	-1.4129
REP.B011_YAPC_24H:G24	BRD-K05977355	fluconazole	YAPC	trt_cp	0.01 uM	24 h	2	126	0.1922	0.157359	0	0	1	1	0	Sterol demethylase inhibitor	CYP3A5|CYP3A7|CYP51A1	-0.3654	0.7506	-1.4129
CPC002_HCC515_24H:BRD-K54094468-003-05-3:10	BRD-K54094468	remoxipride	HCC515	trt_cp	10 uM	24 h	2	280	0.41	0.342611	1	1	1	1	0	Dopamine receptor antagonist	DRD2|DRD3|DRD4|HTR2A|SIGMAR1	-0.3654	0.7507	-1.4129
REP.A005_PC3_24H:B23	BRD-A08187463	racecadotril	PC3	trt_cp	0.125 uM	24 h	2	51	0.2432	0.112615	1	1	1	1	0	Enkephalinase inhibitor	MME	-0.3653	0.75	-1.4127
REP.B015_HT29_24H:M23	BRD-K60237333	niacin	HT29	trt_cp	0.03 uM	24 h	2	112	0.3025	0.186124	1	0	1	1	0	NADPH inhibitor|Vitamin B	HCAR2|HCAR3|DGAT2|HCAR1|NNMT|QPRT	-0.3653	0.75	-1.4126
CPC008_PC3_24H:BRD-K55703048-001-04-4:10	BRD-K55703048	latrepirdine	PC3	trt_cp	10 uM	24 h	5	113	0.17	0.14015	1	0	1	1	0	Glutamate receptor antagonist	HTR6|GRIN2B|HRH1	-0.3653	0.75	-1.4126
CPC014_SKB_24H:BRD-K30743633-001-06-6:10	BRD-K30743633	TCPOBOP	SKB	trt_cp	10 uM	24 h	4	286	0.12	0.187329	0	0	1	1	0	CAR agonist	NR1I3	-0.3653	0.75	-1.4125
LJP006_HS578T_24H:J03	BRD-K72414522	AZD-5438	HS578T	trt_cp	1.11 uM	24 h	3	268	0.58	0.398669	1	1	1	1	0	CDK inhibitor	CCNB1|CCNE1|CDK1|CDK2|KCNH2	-0.3651	0.75	-1.4118
LKCP001_U2OS_48H:H19	BRD-K93754473	tamoxifen	U2OS	trt_cp	10 uM	48 h	5	503	0.5511	0.53239	1	1	1	1	0	Estrogen receptor antagonist|Selective estrogen receptor modulator (SERM)	ESR1|ESR2|CYP3A5|ESRRG|PLD1|PRKCD|PRKCE|PRKCQ|PRKCZ|EBP|GPER1|PRKCA|PRKCB|PRKCG|PRKCI	-0.3651	0.75	-1.4118
CPC015_A375_6H:BRD-K92428153-001-01-0:10	BRD-K92428153	mycophenolate-mofetil	A375	trt_cp	10 uM	6 h	3	269	0.49	0.367117	1	1	1	1	0	Inosine monophosphate dehydrogenase inhibitor|Dehydrogenase inhibitor|Hydroxycarboxylic acid receptor agonist|Immunosuppressant|Inositol monophosphatase inhibitor	IMPDH1|IMPDH2|HCAR2	-0.3651	0.75	-1.4117
CPC014_NPC_24H:BRD-K85985071-001-20-7:10	BRD-K85985071	ellipticine	NPC	trt_cp	10 uM	24 h	3	157	0.23	0.192152	0	0	1	1	0	Topoisomerase inhibitor	TOP2A|TOP2B	-0.3651	0.75	-1.4117
CPC016_A549_24H:BRD-A78377521-001-03-0:10	BRD-A78377521	monastrol	A549	trt_cp	10 uM	24 h	2	102	0.11	0.107109	0	0	1	1	0	Kinesin inhibitor	KIF11	-0.3651	0.75	-1.4116
CPC005_HCC515_6H:BRD-K18518344-001-03-5:10	BRD-K18518344	digitoxigenin	HCC515	trt_cp	10 uM	6 h	2	295	0.45	0.368424	1	1	1	1	0	Na/K-ATPase inhibitor	ATP1A1	-0.365	0.75	-1.4112
REP.A023_A375_24H:N07	BRD-K72005722	VT-464	A375	trt_cp	10 uM	24 h	3	81	0.2152	0.133504	1	1	1	1	0	Cytochrome P450 inhibitor	CYP17A1	-0.365	0.75	-1.4111
REP.B023_PC3_24H:M07	BRD-K71822263	D-serine	PC3	trt_cp	2.22 uM	24 h	2	103	0.1188	0.111856	0	0	1	1	0	Glutamate receptor agonist	GRIN1|GLRA1|GRIN2A|GRIN2B|GRIN2C|GRIN2D|SERPINB3	-0.365	0.75	-1.4111
CPC018_ASC_24H:BRD-K00675675-003-01-2:10	BRD-K00675675	CL-82198	ASC	trt_cp	10 uM	24 h	3	323	0.34	0.335098	0	0	1	1	0	Metalloproteinase inhibitor	MMP13	-0.3649	0.7495	-1.4109
CPC016_ASC_24H:BRD-K03670461-001-02-0:10	BRD-K03670461	BRD-K03670461	ASC	trt_cp	10 uM	24 h	3	138	0.24	0.184025	1	1	1	1	0	EGFR inhibitor	EGFR	-0.3648	0.7485	-1.4107
REP.A007_HA1E_24H:P19	BRD-A51964809	halofantrine	HA1E	trt_cp	10 uM	24 h	3	215	0.4515	0.315049	1	1	1	1	0	Antimalarial	CYP3A5|KCNH2|KCNN4	-0.3648	0.7485	-1.4105
PAC004_U2OS_6H:BRD-K13533483-001-03-0:1.66305	BRD-K13533483	cyclosporin-a	U2OS	trt_cp	1.67 uM	6 h	2	365	0.4	0.386373	1	1	1	1	0	Calcineurin inhibitor	PPIA|CYP3A5|CYP3A7|PPID|ABCB11|CAMLG|FPR1|PPIF|PPP3R2|SLC10A1|SLCO1B1|SLCO1B3	-0.3648	0.7485	-1.4105
REP.A026_A375_24H:C13	BRD-K88506063	KD-025	A375	trt_cp	10 uM	24 h	3	264	0.3602	0.31182	0	0	1	1	0	Rho associated kinase inhibitor	ROCK2	-0.3648	0.7485	-1.4104
CPC018_PHH_24H:BRD-K00675675-003-01-2:10	BRD-K00675675	CL-82198	PHH	trt_cp	10 uM	24 h	3	213	0.26	0.237962	0	0	1	1	0	Metalloproteinase inhibitor	MMP13	-0.3648	0.7485	-1.4104
CPC004_HCC515_24H:BRD-K09631521-001-05-7:10	BRD-K09631521	thiotepa	HCC515	trt_cp	10 uM	24 h	3	249	0.49	0.353206	1	1	1	1	0	Cytochrome P450 inhibitor	CYP2B6|CYP3A4	-0.3648	0.7485	-1.4104
REP.A012_MCF7_24H:F01	BRD-K00911143	brexpiprazole	MCF7	trt_cp	10 uM	24 h	3	360	0.5631	0.455276	1	1	1	1	0	Dopamine receptor antagonist	DRD2|HTR1A|HTR2A|DRD3	-0.3648	0.7485	-1.4104
CPC018_NPC_24H:BRD-K40530731-001-02-5:10	BRD-K40530731	hyoscyamine	NPC	trt_cp	10 uM	24 h	3	87	0.1	0.094317	0	0	1	1	0	Acetylcholine receptor antagonist	CHRM1|CHRM2|CHRM3|CHRM4	-0.3647	0.7485	-1.4103
CPC016_HEPG2_6H:BRD-K69837166-003-01-2:10	BRD-K69837166	trap-101	HEPG2	trt_cp	10 uM	6 h	3	128	0.32	0.204649	1	0	1	1	0	Opioid receptor antagonist|Nociceptin/orphanin FQ (NOP) receptor antagonist	OPRL1	-0.3647	0.7485	-1.4102
CPC008_HT29_6H:BRD-A18279961-019-01-4:10	BRD-A18279961	TEPP-46	HT29	trt_cp	10 uM	6 h	5	107	0.11	0.109703	0	0	1	1	0	Pyruvate kinase isozyme activator	PKM	-0.3647	0.7485	-1.4102
REP.B024_A375_24H:B22	BRD-K73794685	azithromycin	A375	trt_cp	0.08 uM	24 h	2	207	0.269	0.238612	1	1	1	1	0	Bacterial 50S ribosomal subunit inhibitor	MLNR	-0.3647	0.7485	-1.4101
CPC017_A375_6H:BRD-K76674262-001-01-7:10	BRD-K76674262	BRD-K76674262	A375	trt_cp	10 uM	6 h	3	437	0.65	0.538925	0	0	1	1	0	Protein synthesis inhibitor	RPL3	-0.3647	0.7485	-1.4101
CPC018_A549_6H:BRD-K01902415-001-03-4:10	BRD-K01902415	pirinixic-acid	A549	trt_cp	10 uM	6 h	3	95	0.11	0.103369	1	0	1	1	0	PPAR receptor agonist	PPARA	-0.3647	0.7485	-1.41
REP.A011_YAPC_24H:P19	BRD-A33280134	etoposide	YAPC	trt_cp	10 uM	24 h	3	296	0.4532	0.370358	0	0	1	1	0	Topoisomerase inhibitor	TOP2A|TOP2B|CYP2E1|CYP3A5	-0.3647	0.7485	-1.41
REP.B008_HEK293_24H:B16	BRD-A36010170	amcinonide	HEK293	trt_cp	0.08 uM	24 h	2	169	0.3986	0.262448	1	1	1	1	0	Glucocorticoid receptor agonist	NR3C1|ANXA1	-0.3646	0.7485	-1.4099
CPC017_A375_6H:BRD-K28761384-003-03-6:10	BRD-K28761384	BRD-K28761384	A375	trt_cp	10 uM	6 h	3	410	0.06	0.158598	0	0	1	1	0	Dopamine receptor antagonist	DRD2|DRD1|ADRA1A|ADRA2A|DRD5|HRH1|HTR2A	-0.3646	0.7485	-1.4099
CPC017_SKB_24H:BRD-K60230970-001-04-3:10	BRD-K60230970	MG-132	SKB	trt_cp	10 uM	24 h	2	339	0.42	0.381553	0	0	1	1	0	Proteasome inhibitor	PSMB1	-0.3646	0.7484	-1.4097
CPC005_HA1E_24H:BRD-A83937277-001-03-0:10	BRD-A83937277	mephenytoin	HA1E	trt_cp	10 uM	24 h	3	65	0.1	0.0815243	1	0	1	1	0	Hydantoin antiepileptic	SCN5A|CYP2C19|SCN10A|SCN11A|SCN1A|SCN2A|SCN3A|SCN4A|SCN7A|SCN8A|SCN9A	-0.3646	0.7484	-1.4097
REP.B027_YAPC_24H:J10	BRD-K97530723	melatonin	YAPC	trt_cp	0.08 uM	24 h	2	71	0.0882	0.0800192	1	0	1	1	0	Melatonin receptor agonist|Nitric oxide synthase inhibitor	MTNR1A|MTNR1B|TH|ASMT|CALM1|CALR|EPX|ESR1|HTR2B|MPO|NQO2|RORB	-0.3645	0.7469	-1.4096
REP.A016_HELA_24H:D13	BRD-A51820102	econazole	HELA	trt_cp	10 uM	24 h	3	449	0.6891	0.562464	1	1	1	1	0	Lanosterol demethylase inhibitor|Bacterial cell wall synthesis inhibitor|Sterol demethylase inhibitor	CYP51A1|NPY1R|NPY2R|TRPM2|TRPV5	-0.3645	0.747	-1.4096
PBIOA019_HT29_24H:E07	BRD-K96354014	nifedipine	HT29	trt_cp	10 uM	24 h	3	157	0.23	0.192152	1	1	1	1	0	Calcium channel blocker	CACNA1C|CACNA1D|CACNA1S|CACNA1F|CACNA2D1|CYP3A5|CACNA1H|CACNB2|CALM1|GLRA1|GLRA3|GLRB|KCNA1|KCNA5|NR1I2|TRPM3	-0.3646	0.7484	-1.4096
CPC005_A549_24H:BRD-A55946879-001-02-9:10	BRD-A55946879	BW-B70C	A549	trt_cp	10 uM	24 h	3	163	0.21	0.187083	1	0	1	1	0	Lipoxygenase inhibitor	ALOX5	-0.3645	0.7459	-1.4095
REP.B024_PC3_24H:G01	BRD-K75699339	rizatriptan	PC3	trt_cp	2.22 uM	24 h	2	134	0.3064	0.204893	0	0	1	1	0	Serotonin receptor agonist	HTR1D|HTR1B|HTR1F|HTR1A|HTR1E	-0.3645	0.7455	-1.4093
REP.B015_PC3_24H:I20	BRD-K59013864	AM-24	PC3	trt_cp	0.74 uM	24 h	2	72	0.1361	0.100098	1	1	1	1	0	Lipoxygenase inhibitor	ALOX5|SELL	-0.3644	0.7454	-1.4091
CPC005_HA1E_6H:BRD-K27141178-003-02-4:10	BRD-K27141178	SB-203186	HA1E	trt_cp	10 uM	6 h	2	564	0.11	0.251864	0	0	1	1	0	Serotonin receptor antagonist	HTR4	-0.3644	0.7446	-1.4089
MOAR002_PC3_24H:L19	BRD-K32744045	disulfiram	PC3	trt_cp	10 uM	24 h	3	156	0.26	0.203648	1	1	1	1	0	Aldehyde dehydrogenase inhibitor|DNA methyltransferase inhibitor|TRPV agonist	ALDH2|ALDH1A2|ALDH5A1|ALDH7A1|CYP2E1|DNMT1|TRPA1|DBH	-0.3644	0.744	-1.4088
CPC018_A549_6H:BRD-K46556543-237-03-0:10	BRD-K46556543	potassium-canrenoate	A549	trt_cp	10 uM	6 h	3	237	0.32	0.278471	0	0	1	1	0	Mineralocorticoid receptor antagonist	NR3C2	-0.3643	0.7431	-1.4087
PAC004_U2OS_6H:BRD-K03670461-001-02-0:10	BRD-K03670461	BRD-K03670461	U2OS	trt_cp	10 uM	6 h	2	189	0.51	0.31394	1	1	1	1	0	EGFR inhibitor	EGFR	-0.3643	0.7424	-1.4086
PCLB003_HA1E_24H:BRD-K78431006-001-05-2:10	BRD-K78431006	crizotinib	HA1E	trt_cp	10 uM	24 h	2	695	0.59	0.647514	0	0	1	1	0	ALK inhibitor	ALK|MET|CYP2B6|CYP3A5|MST1R|ROS1	-0.3642	0.7419	-1.4084
REP.A012_MDAMB231_24H:J01	BRD-K02079473	oxatomide	MDAMB231	trt_cp	10 uM	24 h	2	107	0.0827	0.0951207	0	0	1	1	0	Histamine receptor antagonist	HRH1	-0.3642	0.7419	-1.4083
REP.A001_HA1E_24H:P17	BRD-K30466858	ellagic-acid	HA1E	trt_cp	0.125 uM	24 h	3	131	0.2406	0.17952	1	1	1	1	0	Glutathione transferase inhibitor|Aldose reductase inhibitor|Beta secretase inhibitor|HCV inhibitor|HIV inhibitor|Quorum sensing signaling modulator|Reverse transcriptase inhibitor	CA1|CA12|CA14|CA2|CA4|CA6|CA9|SYK|AKR1B1|BACE1|CA3|CA5A|CA5B|CA7|CSNK2A1|GSK3B|PRKACA|PRKCA|PRKCB|SQLE	-0.3642	0.7419	-1.4081
REP.B023_PC3_24H:D13	BRD-A68464583	mazindol	PC3	trt_cp	2.22 uM	24 h	2	90	0.1082	0.099785	0	0	1	1	0	Dopamine receptor antagonist|Serotonin reuptake inhibitor	SLC6A3|SLC6A4|SLC6A2	-0.3642	0.7419	-1.4081
CPC004_PC3_6H:BRD-K12513978-001-16-7:10	BRD-K12513978	fenbufen	PC3	trt_cp	10 uM	6 h	5	100	0.07	0.0846018	1	0	1	1	0	Cyclooxygenase inhibitor	PTGS1|PTGS2	-0.3642	0.7419	-1.4081
REP.B022_HT29_24H:M14	BRD-K72414522	AZD-5438	HT29	trt_cp	0.74 uM	24 h	2	306	0.5912	0.430089	1	1	1	1	0	CDK inhibitor	CCNB1|CCNE1|CDK1|CDK2|KCNH2	-0.3641	0.7419	-1.408
REP.B027_HA1E_24H:E09	BRD-A94756469	digoxin	HA1E	trt_cp	0.25 uM	24 h	2	543	0.7282	0.635852	1	1	1	1	0	Na/K-ATPase inhibitor	ATP1A1|ABCB1|RORC|SLCO1B3	-0.3641	0.7417	-1.4078
LJP009_MCF10A_24H:G20	BRD-K09132007	D-4476	MCF10A	trt_cp	3.33 uM	24 h	2	80	0.2429	0.140958	1	0	1	1	0	TGF-beta receptor inhibitor	CSNK1A1|CSNK1D|TGFB1	-0.3641	0.7415	-1.4077
LJP008_ASC_24H:C24	BRD-K79090631	CGP-60474	ASC	trt_cp	0.04 uM	24 h	2	273	0.3851	0.327868	0	0	1	1	0	CDK inhibitor	CDK1|CDK2	-0.364	0.7379	-1.4074
PBIOA015_A549_24H:P20	BRD-K80431395	triciribine	A549	trt_cp	3.33 uM	24 h	2	127	0.34	0.210122	1	1	1	1	0	AKT inhibitor	AKT1|AKT2|AKT3	-0.3639	0.7368	-1.4071
REP.A027_MDAMB231_24H:G01	BRD-A95869247	indapamide	MDAMB231	trt_cp	10 uM	24 h	2	106	0.17	0.13574	0	0	1	1	0	Thiazide diuretic	SLC12A3|KCNQ1|CA7|KCNE1	-0.3639	0.7368	-1.4071
REP.A026_A549_24H:O24	BRD-A20348246	chlormezanone	A549	trt_cp	0.04 uM	24 h	2	169	0.2086	0.189859	0	0	1	1	0	GABA receptor antagonist	GABRA1|TSPO	-0.3639	0.7369	-1.4071
CPC006_SW480_6H:BRD-A56592690-001-01-9:30	BRD-A56592690	PX-12	SW480	trt_cp	30 uM	6 h	2	200	0.21	0.207231	0	0	1	1	0	Thioredoxin inhibitor	TXN|TXNRD1|TXNRD2	-0.3639	0.7366	-1.4069
CPC014_NPC_24H:BRD-K38615104-001-06-8:10	BRD-K38615104	A-443654	NPC	trt_cp	10 uM	24 h	2	683	0.79	0.74277	0	0	1	1	0	AKT inhibitor	AKT1|AKT2	-0.3639	0.7366	-1.4069
REP.B017_JURKAT_24H:O08	BRD-K64874225	NSC-4644	JURKAT	trt_cp	0.37 uM	24 h	2	61	0.0374	0.0482982	1	0	1	1	0	ACAT inhibitor|Sterol regulatory element binding protein (SREBP) inhibitor	SOAT1|PYGM	-0.3638	0.7352	-1.4068
REP.B008_HA1E_24H:G01	BRD-K60038276	irbesartan	HA1E	trt_cp	2.22 uM	24 h	2	117	0.2921	0.186934	1	1	1	1	0	Angiotensin receptor antagonist	AGTR1|JUN|SLC10A1	-0.3638	0.7339	-1.4067
LJP006_BT20_24H:I07	BRD-K97764662	PD-173074	BT20	trt_cp	10 uM	24 h	2	97	0.4711	0.216159	1	1	1	1	0	FGFR inhibitor|VEGFR inhibitor	FGFR1|FGFR3|FGFR2|FGFR4|FLT1|FLT4|KDR|PDGFRA|PDGFRB	-0.3638	0.7341	-1.4067
CPC018_PHH_24H:BRD-A14798026-001-01-8:10	BRD-A14798026	mestranol	PHH	trt_cp	10 uM	24 h	3	269	0.45	0.351814	0	0	1	1	0	Estrogen receptor agonist	ESR1	-0.3638	0.7341	-1.4067
AICHI002_OCILY3_24H:B07	BRD-K72703948	ZM-447439	OCILY3	trt_cp	10 uM	24 h	3	106	0.358	0.196981	1	1	1	1	0	Aurora kinase inhibitor	AURKA|AURKB	-0.3638	0.7338	-1.4065
CPC002_HCC515_24H:BRD-K34092021-001-02-3:10	BRD-K34092021	arvanil	HCC515	trt_cp	10 uM	24 h	3	108	0.23	0.15937	1	0	1	1	0	TRPV agonist	TRPV1|CNR1	-0.3637	0.7336	-1.4062
REP.A019_MCF7_24H:L24	BRD-A49399758	desmopressin-acetate	MCF7	trt_cp	0.04 uM	24 h	3	289	0.3887	0.338912	0	0	1	1	0	Vasopressin receptor agonist	AVPR2|AVPR1A|AVPR1B|OXTR	-0.3636	0.7328	-1.406
REP.B010_HEK293_24H:M08	BRD-A14966924	alaproclate	HEK293	trt_cp	0.74 uM	24 h	2	65	0.2793	0.136246	0	0	1	1	0	Serotonin receptor antagonist	SLC6A4	-0.3636	0.7328	-1.406
CPC006_A549_6H:BRD-K73789395-001-06-5:102.71	BRD-K73789395	ZM-336372	A549	trt_cp	100 uM	6 h	4	293	0.53	0.398476	1	1	1	1	0	RAF inhibitor	BRAF|LCK|MAPK14|RAF1	-0.3636	0.7328	-1.4059
CVD001_HUH7_24H:BRD-K46937689-001-05-1:2.6564	BRD-K46937689	phenazone	HUH7	trt_cp	2.5 uM	24 h	3	100	0.37	0.194505	0	0	1	1	0	Cyclooxygenase inhibitor	PTGS1|PTGS2	-0.3635	0.7328	-1.4056
REP.B019_MCF10A_24H:N23	BRD-K50031829	PF-04447943	MCF10A	trt_cp	0.03 uM	24 h	2	75	0.1496	0.107109	1	1	1	1	0	Phosphodiesterase inhibitor	PDE9A	-0.3635	0.7328	-1.4054
CPC004_A375_6H:BRD-K62792802-001-02-8:10	BRD-K62792802	LY-83583	A375	trt_cp	10 uM	6 h	3	510	0.27	0.37523	1	0	1	1	0	Guanylyl cyclase inhibitor	GUCY1A2	-0.3634	0.7328	-1.4052
NMH002_FIBRNPC_24H:BRD-K01638814-050-01-2:10	BRD-K01638814	rilmenidine	NPC	trt_cp	10 uM	24 h	3	199	0.18	0.191379	1	0	1	1	0	Adrenergic receptor agonist|Imidazoline receptor agonist	NISCH|ADRA2A	-0.3634	0.7328	-1.4051
CPC016_A549_24H:BRD-K91370081-001-10-3:10	BRD-K91370081	anisomycin	A549	trt_cp	10 uM	24 h	3	512	0.76	0.630772	0	0	1	1	0	DNA inhibitor	RPL10L|RPL11|RPL13A|RPL15|RPL19|RPL23|RPL23A|RPL26L1|RPL3|RPL37|RPL8|RSL24D1|SNU13	-0.3634	0.7328	-1.4051
CPC018_HEPG2_6H:BRD-K74913225-001-03-3:10	BRD-K74913225	brinzolamide	HEPG2	trt_cp	10 uM	6 h	3	54	0.03	0.0406994	1	0	1	1	0	Carbonic anhydrase inhibitor	CA2|CA7|CA1|CYP2B6|CYP2C8|CA12|CA14|CA4|CA5A	-0.3634	0.7328	-1.4051
LKCP002_A549_48H:B24	BRD-A22380646	pantoprazole	A549	trt_cp	0.12 uM	48 h	5	409	0.2633	0.331832	1	1	1	1	0	Proton pump inhibitor	ATP4A|CYP2C19|CYP3A4	-0.3634	0.7328	-1.4051
REP.A025_A375_24H:C03	BRD-K98624455	bepotastine	A375	trt_cp	1.11 uM	24 h	3	95	0.2673	0.161136	1	1	1	1	0	Histamine receptor antagonist	HRH1	-0.3634	0.7328	-1.405
REP.B006_PC3_24H:H01	BRD-K20738689	dazmegrel	PC3	trt_cp	2.22 uM	24 h	2	242	0.4572	0.33635	0	0	1	1	0	Thromboxane synthase inhibitor	TBXAS1	-0.3632	0.7325	-1.4045
REP.B017_MCF7_24H:I24	BRD-A65013509	oxybutynin	MCF7	trt_cp	0.01 uM	24 h	2	70	0.0967	0.0831942	1	0	1	1	0	Acetylcholine receptor antagonist	CHRM3|CHRM2|CHRM1|CHRM4	-0.3632	0.7326	-1.4045
CPC010_A549_6H:BRD-K31471398-311-04-6:10	BRD-K31471398	dihydrexidine	A549	trt_cp	10 uM	6 h	2	173	0.32	0.237919	1	1	1	1	0	Dopamine receptor agonist	DRD1|DRD2|DRD3|DRD4|DRD5	-0.3632	0.7326	-1.4045
LKCP001_MCF7_48H:O07	BRD-K97472745	gestrinone	MCF7	trt_cp	10 uM	48 h	4	149	0.2861	0.208777	1	1	1	1	0	Progesterone receptor antagonist	PGR|AR|ESR1	-0.3632	0.7285	-1.4043
PBIOA015_HA1E_24H:J07	BRD-K71879491	tretinoin	HA1E	trt_cp	10 uM	24 h	3	136	0.28	0.197324	1	1	1	1	0	Retinoid receptor agonist|Retinoid receptor ligand	RARG|RORB|RARA|RARB|ALDH1A1|ALDH1A2|GPRC5A|NR0B1|NR2C2|PPARD|RARRES1|RORC|RXRB|RXRG	-0.3631	0.7283	-1.4042
REP.A004_HEK293_24H:P20	BRD-K27204852	balicatib	HEK293	trt_cp	3.33 uM	24 h	2	108	0.3447	0.195103	0	0	1	1	0	Cathepsin inhibitor	CTSK	-0.3632	0.7283	-1.4042
REP.A027_PC3_24H:L24	BRD-K99504665	goserelin-acetate	PC3	trt_cp	0.04 uM	24 h	3	175	0.1553	0.1667	0	0	1	1	0	Gonadotropin receptor agonist	GNRHR|GNRH1|LHCGR	-0.3631	0.7276	-1.4039
CPC017_NPC_24H:BRD-K09549677-300-01-8:10	BRD-K09549677	mibefradil	NPC	trt_cp	10 uM	24 h	2	638	0.74	0.694795	0	0	1	1	0	Calcium channel blocker	CACNA1H|CACNA1G|CACNA1C|CACNA1I|SCN2A|SCN4A|SCN5A|SCN9A|ANO1|CACNA1D|CACNA1F|CACNA1S|CACNB1|CACNB2|CACNB3|CACNB4|CATSPER1|CATSPER2|CATSPER3|CATSPER4	-0.3631	0.7278	-1.4039
REP.A022_A375_24H:H07	BRD-A70858459	estramustine	A375	trt_cp	10 uM	24 h	3	374	0.6724	0.507084	1	1	1	1	0	DNA inhibitor	ESR1|ESR2|MAP1A|MAP2	-0.363	0.7249	-1.4036
LJP005_HA1E_24H:F06	BRD-K79090631	CGP-60474	HA1E	trt_cp	0.04 uM	24 h	3	384	0.59	0.481307	1	1	1	1	0	CDK inhibitor	CDK1|CDK2	-0.363	0.7249	-1.4035
REP.A024_HT29_24H:F13	BRD-K75089421	procainamide	HT29	trt_cp	10 uM	24 h	2	62	0.1656	0.102461	1	1	1	1	0	Sodium channel inhibitor	SCN5A|DNMT1	-0.363	0.7249	-1.4035
CPC017_MCF7_24H:BRD-K67298865-001-03-3:10	BRD-K67298865	SB-431542	MCF7	trt_cp	10 uM	24 h	5	328	0.39	0.361659	1	1	1	1	0	TGF-beta receptor inhibitor	TGFBR1|ACVR1C|ACVR1B	-0.3629	0.7249	-1.4034
LKCP002_MCF7_24H:O24	BRD-K17513304	firategrast	MCF7	trt_cp	0.12 uM	24 h	4	210	0.3608	0.278339	1	1	1	1	0	Integrin inhibitor	ITGA4|ITGB1|ITGB7	-0.3629	0.7249	-1.4033
CPC018_SKB_24H:BRD-K72895815-001-01-4:10	BRD-K72895815	SSR-69071	SKB	trt_cp	10 uM	24 h	3	185	0.45	0.291758	1	1	1	1	0	Leukocyte elastase inhibitor	ELANE	-0.3628	0.7249	-1.403
LIVB002_HUH7_72H:B20	BRD-K55696337	topotecan	HUH7	trt_cp	8 uM	72 h	3	491	0.61	0.553396	0	0	1	1	0	Topoisomerase inhibitor	TOP1|TOP1MT	-0.3628	0.7249	-1.403
REP.B007_HT29_24H:P13	BRD-K51033547	tramadol	HT29	trt_cp	2.22 uM	24 h	2	169	0.1477	0.159759	0	0	1	1	0	Opioid receptor agonist|Norepinephrine reuptake inhibitor|Serotonin reuptake inhibitor	OPRM1|SLC6A2|SLC6A4|CYP2B6|CHRFAM7A|CHRM3|GRIN3A|HTR2C|OPRD1|OPRK1	-0.3628	0.7247	-1.4028
CPC020_HA1E_6H:BRD-K11801786-003-01-7:10	BRD-K11801786	trimidox	HA1E	trt_cp	10 uM	6 h	3	109	0.04	0.0667688	1	0	1	1	0	Ribonucleoside reductase inhibitor	RRM1	-0.3627	0.7234	-1.4026
CPC001_HA1E_24H:BRD-K17896185-001-01-2:10	BRD-K17896185	FIT	HA1E	trt_cp	10 uM	24 h	3	432	0.64	0.531695	1	1	1	1	0	Opioid receptor agonist	OPRD1	-0.3628	0.7234	-1.4026
CPC014_A549_24H:BRD-K31484631-001-05-0:10	BRD-K31484631	rifabutin	A549	trt_cp	10 uM	24 h	3	61	0.29	0.134491	0	0	1	1	0	Protein synthesis inhibitor	CYP3A4|HSP90AA1|HSP90B1	-0.3627	0.7234	-1.4023
MOAR005_PC3_24H:A19	BRD-K24696047	NVP-AEW541	PC3	trt_cp	10 uM	24 h	3	272	0.59	0.40508	1	1	1	1	0	IGF-1 inhibitor	IGF1R|INSR	-0.3627	0.7234	-1.4023
CPC001_PC3_6H:BRD-K04976539-001-01-0:10	BRD-K04976539	aminogenistein	PC3	trt_cp	10 uM	6 h	4	98	0.11	0.104988	1	0	1	1	0	Src inhibitor	LCK	-0.3626	0.7234	-1.4021
REP.A012_MCF10A_24H:G12	BRD-A01636364	bupivacaine	MCF10A	trt_cp	0.04 uM	24 h	3	104	0.1405	0.122232	1	1	1	1	0	Sodium channel inhibitor	SCN9A|KCNA5|PTGER1|SCN10A|SCN4A	-0.3626	0.7234	-1.4019
CPC014_SKB_24H:BRD-A98283014-003-07-7:10	BRD-A98283014	calmidazolium	SKB	trt_cp	10 uM	24 h	3	394	0.2	0.283853	0	0	1	1	0	Calcium channel blocker|Calmodulin antagonist	ATP2B1|PDE1A	-0.3625	0.7234	-1.4018
CPC018_A549_6H:BRD-K48869804-001-01-3:10	BRD-K48869804	icilin	A549	trt_cp	10 uM	6 h	3	146	0.09	0.115912	1	0	1	1	0	TRPV agonist	TRPA1|TRPM8	-0.3625	0.7234	-1.4018
CPC017_HEPG2_6H:BRD-K10870738-001-02-4:10	BRD-K10870738	CDC	HEPG2	trt_cp	10 uM	6 h	2	186	0.17	0.179809	1	1	1	1	0	Lipoxygenase inhibitor	ALOX12	-0.3625	0.7234	-1.4017
CPC014_A375_6H:D06	BRD-K52911425	GDC-0941	A375	trt_cp	10 uM	6 h	2	150	0.4	0.247689	1	1	1	1	0	PI3K inhibitor	PIK3CG|PIK3CA|PIK3CB|PIK3CD	-0.3625	0.7234	-1.4017
REP.B024_THP1_24H:J02	BRD-K76775527	nimesulide	THP1	trt_cp	0.74 uM	24 h	2	106	0.3484	0.194322	1	1	1	1	0	Cyclooxygenase inhibitor	PTGS2|LTF|PLA2G2E|PTGS1	-0.3625	0.7234	-1.4017
REP.A001_HELA_24H:E13	BRD-A26690767	saquinavir	HELA	trt_cp	10 uM	24 h	3	173	0.2828	0.223663	1	1	1	1	0	HIV inhibitor	CYP3A5|CYP3A4	-0.3625	0.7234	-1.4015
CPC009_VCAP_6H:BRD-K74501079-001-13-2:10	BRD-K74501079	azithromycin	VCAP	trt_cp	10 uM	6 h	4	374	0.28	0.327224	1	0	1	1	0	Bacterial 50S ribosomal subunit inhibitor	MLNR	-0.3624	0.7234	-1.4013
CPC009_A549_6H:BRD-A47598013-001-03-4:10	BRD-A47598013	citalopram	A549	trt_cp	10 uM	6 h	3	250	0.31	0.281502	1	1	1	1	0	Serotonin receptor antagonist	SLC6A4|SLC6A2	-0.3624	0.7234	-1.4011
CPC004_HCC515_24H:BRD-A16694057-001-03-5:10	BRD-A16694057	BADGE	HCC515	trt_cp	10 uM	24 h	3	243	0.4	0.315256	1	1	1	1	0	PPAR receptor antagonist	PPARG	-0.3623	0.7234	-1.401
REP.B025_MCF10A_24H:L01	BRD-K76617868	fasudil	MCF10A	trt_cp	2.22 uM	24 h	2	52	0.2884	0.123831	1	1	1	1	0	Rho associated kinase inhibitor	ROCK1|ROCK2|PKIA|PRKACA	-0.3623	0.7234	-1.401
CPC012_NEU_24H:BRD-K02130563-001-06-4:10	BRD-K02130563	panobinostat	NEU	trt_cp	10 uM	24 h	3	354	0.62	0.473727	0	0	1	1	0	HDAC inhibitor	HDAC1|HDAC2|HDAC3|HDAC4|HDAC6|HDAC7|HDAC8|HDAC9	-0.3622	0.7233	-1.4006
CPC016_NPC_24H:BRD-A18579359-001-02-3:10	BRD-A18579359	wiskostatin	NPC	trt_cp	10 uM	24 h	4	296	0.42	0.356534	0	0	1	1	0	Neural Wiskott-Aldrich syndrome protein inhibitor	WAS|WASL	-0.3621	0.7207	-1.4002
REP.B017_MCF10A_24H:C02	BRD-K44771174	ibutamoren	MCF10A	trt_cp	0.74 uM	24 h	2	95	0.1847	0.133945	1	1	1	1	0	Growth hormone secretagogue receptor agonist	GH1|GHR|GHSR	-0.362	0.7166	-1.3998
CPC014_A549_6H:BRD-K52911425-001-02-3:10	BRD-K52911425	GDC-0941	A549	trt_cp	10 uM	6 h	3	208	0.44	0.305906	1	1	1	1	0	PI3K inhibitor	PIK3CG|PIK3CA|PIK3CB|PIK3CD	-0.362	0.7166	-1.3998
MOAR017_HAP1.BRD4_24H:C02	BRD-K43471985	OTX-015	HAP1	trt_cp	0.66 uM	24 h	3	272	0.5804	0.401771	1	1	1	1	0	Bromodomain inhibitor	BRD2|BRD3|BRD4|SELE|VCAM1	-0.362	0.7166	-1.3997
CPC004_VCAP_24H:A24	BRD-K60274257	dephostatin	VCAP	trt_cp	10 uM	24 h	6	461	0.28	0.363296	0	0	1	1	0	Tyrosine phosphatase inhibitor	PTPN1|PTPN6	-0.362	0.7166	-1.3996
REP.B017_HA1E_24H:A08	BRD-K50163129	acrivastine	HA1E	trt_cp	0.74 uM	24 h	2	85	0.3239	0.167782	1	1	1	1	0	Histamine receptor antagonist	HRH1	-0.3619	0.7166	-1.3995
CPC017_A375_6H:BRD-K64044582-001-02-8:10	BRD-K64044582	linoleamide	A375	trt_cp	10 uM	6 h	3	148	0.05	0.0869854	0	0	1	1	0	ACAT inhibitor	SOAT1|SOAT2	-0.3619	0.7166	-1.3994
REP.A010_YAPC_24H:M09	BRD-A14966924	alaproclate	YAPC	trt_cp	1.11 uM	24 h	2	57	0.1635	0.0976173	0	0	1	1	0	Serotonin receptor antagonist	SLC6A4	-0.3619	0.7166	-1.3994
CPC011_PC3_6H:BRD-K22947005-050-07-8:10	BRD-K22947005	dexbrompheniramine	PC3	trt_cp	10 uM	6 h	4	132	0.11	0.121847	1	0	1	1	0	Histamine receptor antagonist	HRH1	-0.3618	0.7166	-1.399
LIVB002_HUH7_72H:H05	BRD-K37991163	paroxetine	HUH7	trt_cp	10 uM	72 h	3	367	0.51	0.43747	0	0	1	1	0	Selective serotonin reuptake inhibitor (SSRI)	SLC6A4|CHRM1|CHRM2|CHRM3|CHRM4|CHRM5|HTR2A|SLC6A2	-0.3618	0.7166	-1.3989
REP.B020_THP1_24H:H20	BRD-K82928847	ACY-1215	THP1	trt_cp	0.74 uM	24 h	2	196	0.2649	0.230409	0	0	1	1	0	HDAC inhibitor	HDAC6|HDAC1|HDAC2|HDAC3|HDAC8	-0.3618	0.7166	-1.3988
CPC017_ASC_24H:BRD-K29555132-001-02-2:10	BRD-K29555132	arachidonamide	ASC	trt_cp	10 uM	24 h	4	324	0.42	0.373016	1	0	1	1	0	Cannabinoid receptor agonist	CNR1|CNR2	-0.3618	0.7166	-1.3988
CPC015_ASC_24H:BRD-K04548931-003-05-8:10	BRD-K04548931	epirubicin	ASC	trt_cp	10 uM	24 h	3	551	0.56	0.561695	0	0	1	1	0	Topoisomerase inhibitor	TOP2A|CHD1	-0.3618	0.7166	-1.3988
REP.A013_HT29_24H:L24	BRD-K42679050	Y-27152	HT29	trt_cp	0.04 uM	24 h	2	93	0.3096	0.171582	0	0	1	1	0	Potassium channel activator	KCNJ8	-0.3617	0.7166	-1.3985
REP.A024_HELA_24H:N01	BRD-K78431006	crizotinib	HELA	trt_cp	10 uM	24 h	3	306	0.6078	0.436085	1	1	1	1	0	ALK inhibitor	ALK|MET|CYP2B6|CYP3A5|MST1R|ROS1	-0.3616	0.7166	-1.3983
LJP008_CD34_24H:G01	BRD-K13094524	PFI-1	CD34	trt_cp	10 uM	24 h	3	335	0.5664	0.440468	1	1	1	1	0	Bromodomain inhibitor	BRD4	-0.3616	0.7166	-1.3982
PCLB002_PC3_24H:BRD-K81839095:0.12	BRD-K81839095	estrone	PC3	trt_cp	0.12 uM	24 h	6	173	0.21	0.192736	1	0	1	1	0	Estrogen receptor agonist	ESR1|ESR2	-0.3615	0.7166	-1.398
REP.B025_HT29_24H:C07	BRD-K91336023	mesulergine	HT29	trt_cp	2.22 uM	24 h	2	83	0.2547	0.147023	1	0	1	1	0	Dopamine receptor agonist	HTR2A|HTR2C|HTR7|HTR2B|HTR3A|HTR3B|HTR6	-0.3615	0.7166	-1.3978
CPC014_PHH_24H:BRD-K64052750-001-05-0:10	BRD-K64052750	gefitinib	PHH	trt_cp	10 uM	24 h	4	95	0.29	0.167838	0	0	1	1	0	EGFR inhibitor	EGFR|CYP2C19	-0.3615	0.7166	-1.3978
CPC017_ASC_24H:BRD-K07220430-001-03-6:10	BRD-K07220430	cinnarizine	ASC	trt_cp	10 uM	24 h	4	396	0.24	0.311734	1	0	1	1	0	Calcium channel blocker	HRH1	-0.3615	0.7165	-1.3977
CPC001_PC3_24H:F02	BRD-A71262238	nafadotride	PC3	trt_cp	10 uM	24 h	5	199	0.1539	0.176961	1	0	1	1	0	Dopamine receptor antagonist	DRD3|DRD2|HTR1A	-0.3614	0.7163	-1.3975
CPC011_HT29_6H:BRD-K79511609-001-17-6:10	BRD-K79511609	BRD-K79511609	HT29	trt_cp	10 uM	6 h	4	128	0.12	0.125322	1	0	1	1	0	Adenosine receptor agonist	ADORA1|ADORA2A|ADORA2B	-0.3613	0.713	-1.3971
REP.A025_YAPC_24H:C01	BRD-K98624455	bepotastine	YAPC	trt_cp	10 uM	24 h	3	190	0.3949	0.276982	1	1	1	1	0	Histamine receptor antagonist	HRH1	-0.3613	0.713	-1.397
LPROT005_A549_6H:BRD-K54997624:0.25	BRD-K54997624	alpelisib	A549	trt_cp	0.25 uM	6 h	3	272	0.14	0.197324	0	0	1	1	0	PI3K inhibitor	PIK3CA|PIK3CB|PIK3CD|PIK3CG	-0.3613	0.713	-1.397
CVD001_HEPG2_24H:BRD-K58299615-001-02-7:10	BRD-K58299615	Ro-90-7501	HEPG2	trt_cp	10 uM	24 h	3	189	0.43	0.288268	1	1	1	1	0	Beta amyloid inhibitor	APP	-0.3613	0.713	-1.397
REP.B019_A375_24H:A22	BRD-K44974079	ticagrelor	A375	trt_cp	0.08 uM	24 h	2	115	0.411	0.219837	1	1	1	1	0	Purinergic receptor antagonist	P2RY12|CYP3A5	-0.3613	0.713	-1.3969
CPC016_HEPG2_6H:BRD-K06147391-300-04-3:10	BRD-K06147391	telenzepine	HEPG2	trt_cp	10 uM	6 h	3	294	0.09	0.164485	1	0	1	1	0	Acetylcholine receptor antagonist	CHRM1	-0.3613	0.713	-1.3969
REP.A024_HELA_24H:P11	BRD-K79501723	cyclizine	HELA	trt_cp	0.125 uM	24 h	3	114	0.1918	0.149523	1	0	1	1	0	Histamine receptor antagonist	HRH1|SULT1E1	-0.3613	0.713	-1.3969
CPC018_NPC_24H:BRD-K17497770-001-01-0:10	BRD-K17497770	butein	NPC	trt_cp	10 uM	24 h	3	485	0.61	0.550005	0	0	1	1	0	EGFR inhibitor|Src inhibitor	ACE|CXCL8|IL6|SIRT1|SRD5A1|SRD5A2|TNF	-0.3612	0.713	-1.3968
REP.A017_MDAMB231_24H:D04	BRD-K44827188	vismodegib	MDAMB231	trt_cp	0.37 uM	24 h	3	112	0.1477	0.130056	0	0	1	1	0	Hedgehog pathway inhibitor|Smoothened receptor antagonist	SMO|ABCB1|ABCG2|CYP2C19|CYP2C8|DHH|IHH|PTCH1	-0.3612	0.713	-1.3967
REP.B022_HUVEC.A_24H:D08	BRD-K68232413	etizolam	HUVEC	trt_cp	0.74 uM	24 h	2	92	0.1527	0.119852	0	0	1	1	0	Benzodiazepine receptor agonist	GABRA1|GABRA2|GABRA3|GABRA5|PTAFR	-0.3612	0.713	-1.3966
CRCGN004_PC3_24H:BRD-K01815685-002-01-3:10	BRD-K01815685	BRD-K01815685	PC3	trt_cp	10 uM	24 h	6	134	0.2	0.165538	1	1	1	1	0	Aryl hydrocarbon receptor agonist|Indoleamine 2,3-dioxygenase inhibitor	AHR|IDO1	-0.3612	0.713	-1.3966
CPC014_ASC_24H:BRD-K50168500-001-01-2:10	BRD-K50168500	canertinib	ASC	trt_cp	10 uM	24 h	3	116	0.28	0.182238	1	1	1	1	0	EGFR inhibitor	EGFR|ERBB2|ERBB4|AKT1	-0.3612	0.713	-1.3966
NMH001_FIBRNPC_6H:BRD-K73251053-001-01-0:10	BRD-K73251053	clorgiline	NPC	trt_cp	10 uM	6 h	2	186	0.08	0.123348	0	0	1	1	0	Monoamine oxidase inhibitor	MAOA	-0.3612	0.713	-1.3966
CPC011_PC3_24H:BRD-K82143716-001-13-2:10	BRD-K82143716	flucytosine	PC3	trt_cp	10 uM	24 h	4	107	0.07	0.0875128	1	0	1	1	0	Antifungal	DNMT1	-0.3612	0.713	-1.3965
CPC001_HCC515_24H:BRD-K68341547-003-01-6:10	BRD-K68341547	W-9	HCC515	trt_cp	10 uM	24 h	3	89	0.25	0.150833	1	1	1	1	0	Calmodulin inhibitor	CALM2	-0.361	0.71	-1.396
CPC018_A549_6H:BRD-K49657628-001-02-3:10	BRD-K49657628	BRD-K49657628	A549	trt_cp	10 uM	6 h	3	112	0.07	0.0895341	1	0	1	1	0	EGFR inhibitor|Tyrosine kinase inhibitor	EGFR	-0.361	0.71	-1.3957
REP.A028_HEK293_24H:M07	BRD-K96740444	itopride	HEK293	trt_cp	10 uM	24 h	2	74	0.1304	0.0993311	0	0	1	1	0	Dopamine receptor antagonist	DRD2|ACHE|CHRM3	-0.3609	0.71	-1.3955
REP.B020_MDAMB231_24H:K17	BRD-K46018455	bezafibrate	MDAMB231	trt_cp	0.03 uM	24 h	2	191	0.2046	0.199894	0	0	1	1	0	PPAR receptor agonist	PPARA|PPARD|PPARG|HSD11B1|LPL	-0.3609	0.71	-1.3954
CPC008_A549_6H:BRD-A12633378-001-05-4:10	BRD-A12633378	ML-213	A549	trt_cp	10 uM	6 h	3	96	0.22	0.146953	0	0	1	1	0	Potassium channel activator	KCNQ4|KCNQ2	-0.3608	0.71	-1.3953
CPC006_VCAP_24H:BRD-A58048407-001-10-5:10	BRD-A58048407	nimodipine	VCAP	trt_cp	10 uM	24 h	5	141	0.15	0.147057	0	0	1	1	0	Calcium channel blocker	CACNA1C|NR3C2|CACNA1D|CACNA1F|CACNA1S|AHR|CACNB1|CACNB2|CACNB3|CACNB4|CFTR	-0.3609	0.71	-1.3953
REP.A004_HEK293_24H:A19	BRD-A19195498	trimipramine	HEK293	trt_cp	10 uM	24 h	3	132	0.2963	0.199979	0	0	1	1	0	Norepinephrine inhibitor|Tricyclic antidepressant	SLC6A2|SLC6A4|SLC6A3|ADRA1A|ADRA1B|ADRA2A|ADRA2B|ADRB1|ADRB2|ADRB3|CHRM1|CHRM2|CHRM3|CHRM4|CHRM5|DRD1|DRD2|DRD5|HRH1|HTR1A|HTR1D|HTR2A|HTR2C|HTR3A	-0.3608	0.71	-1.3952
REP.B027_HELA_24H:P07	BRD-K97963946	EMD-1214063	HELA	trt_cp	2.22 uM	24 h	2	87	0.1647	0.121042	1	0	1	1	0	HGF receptor inhibitor	MET	-0.3608	0.71	-1.3951
REP.B009_JURKAT_24H:M09	BRD-K33106058	cytarabine	JURKAT	trt_cp	0.25 uM	24 h	2	41	0.1512	0.0796156	0	0	1	1	0	Ribonucleotide reductase inhibitor	POLA1|POLB|POLD1|POLE	-0.3608	0.71	-1.3951
REP.B024_HA1E_24H:C01	BRD-K74065929	doramapimod	HA1E	trt_cp	2.22 uM	24 h	2	172	0.2926	0.226846	1	1	1	1	0	P38 MAPK inhibitor	MAPK14|MAPK11|MAPK12|DDR2|MAPK13	-0.3607	0.71	-1.3949
REP.B014_MCF7_24H:F24	BRD-K59197931	naproxen	MCF7	trt_cp	0.01 uM	24 h	2	80	0.1909	0.124962	1	0	1	1	0	Cyclooxygenase inhibitor	PTGS2|PTGS1	-0.3607	0.7097	-1.3947
LJP009_CD34_24H:P03	BRD-K68407802	KIN001-055	CD34	trt_cp	1.11 uM	24 h	3	274	0.584	0.404494	1	1	1	1	0	EGFR inhibitor|JAK inhibitor|Leukotriene inhibitor|Mediator release inhibitor	JAK3	-0.3607	0.7095	-1.3946
REP.A020_YAPC_24H:G12	BRD-K80082640	otamixaban	YAPC	trt_cp	0.04 uM	24 h	3	88	0.0458	0.0641955	1	0	1	1	0	Coagulation factor inhibitor	F10	-0.3606	0.7093	-1.3944
CPC014_HEPG2_6H:BRD-K99545815-001-01-4:10	BRD-K99545815	PF-562271	HEPG2	trt_cp	10 uM	6 h	3	555	0.69	0.625751	1	1	1	1	0	Focal adhesion kinase inhibitor	PTK2|PTK2B	-0.3606	0.7089	-1.3943
CPC016_NEU_24H:BRD-K22010301-001-01-2:10	BRD-K22010301	JLK-6	NEU	trt_cp	10 uM	24 h	3	87	0.09	0.089477	0	0	1	1	0	Gamma secretase inhibitor|Beta amyloid inhibitor	PSEN1	-0.3606	0.709	-1.3943
CPC018_A549_6H:BRD-K26429091-051-01-9:10	BRD-K26429091	J-104129	A549	trt_cp	10 uM	6 h	3	87	0.03	0.0516596	1	0	1	1	0	Acetylcholine receptor antagonist	CHRM3	-0.3606	0.7092	-1.3943
CPC014_PHH_24H:BRD-K18135438-001-08-4:10	BRD-K18135438	BRD-K18135438	PHH	trt_cp	10 uM	24 h	4	91	0.16	0.122014	0	0	1	1	0	11-beta-HSD1 inhibitor|FXR agonist	HSD11B1|NR1H4	-0.3605	0.7048	-1.3938
CPC017_ASC_24H:BRD-K54759182-003-02-3:10	BRD-K54759182	dosulepin	ASC	trt_cp	10 uM	24 h	4	625	0.13	0.288232	0	0	1	1	0	Norepinephrine inhibitor|Serotonin reuptake inhibitor|Tricyclic antidepressant	SLC6A2|SLC6A4|CYP2C19|CHRM1|CHRM2|CHRM3|CHRM4|CHRM5|HRH1	-0.3605	0.7048	-1.3938
PAC004_U2OS_6H:BRD-K07220430-001-03-6:5.4272	BRD-K07220430	cinnarizine	U2OS	trt_cp	6.66 uM	6 h	2	18	0.09	0.0406994	1	0	1	1	0	Calcium channel blocker	HRH1	-0.3605	0.7048	-1.3938
AICHI001_NALM6_24H:K02	BRD-K92428232	GSK-461364	NALM6	trt_cp	2.5 uM	24 h	3	292	0.49	0.38249	1	1	1	1	0	PLK inhibitor	PLK1	-0.3604	0.7048	-1.3937
REP.B010_HELA_24H:B08	BRD-A11990600	lorazepam	HELA	trt_cp	0.74 uM	24 h	2	90	0.0748	0.0829665	1	1	1	1	0	Benzodiazepine receptor agonist	GABRA1|GABRA2|GABRA3|GABRA5|GABRA4|GABRA6|GABRB1|GABRB2|GABRB3|GABRD|GABRE|GABRG1|GABRG2|GABRG3|GABRP|GABRQ|TSPO	-0.3604	0.7048	-1.3934
REP.A028_HT29_24H:M16	BRD-K96862998	pirfenidone	HT29	trt_cp	0.37 uM	24 h	2	148	0.2984	0.212501	0	0	1	1	0	TGF-beta receptor inhibitor	TNF|MAPK14|TNFRSF1A|FURIN	-0.3604	0.7048	-1.3933
REP.A006_HT29_24H:I01	BRD-K21547160	sufentanil	HT29	trt_cp	10 uM	24 h	3	213	0.4567	0.315381	1	1	1	1	0	Opioid receptor modulator	OPRM1|OPRD1|OPRK1	-0.3603	0.7046	-1.3932
CPC014_SKB_24H:BRD-K05977823-001-01-2:10	BRD-K05977823	tenovins	SKB	trt_cp	10 uM	24 h	4	184	0.34	0.252918	0	0	1	1	0	SIRT inhibitor|p53 activator	SIRT1|SIRT2	-0.3603	0.7047	-1.3932
CPD001_PC3_24H:BRD-K06147391-300-05-0:10	BRD-K06147391	telenzepine	PC3	trt_cp	10 uM	24 h	3	86	0.17	0.122266	1	0	1	1	0	Acetylcholine receptor antagonist	CHRM1	-0.3603	0.7046	-1.3931
CPC001_HCC515_24H:BRD-A03359064-001-01-5:10	BRD-A03359064	ICI-89406	HCC515	trt_cp	10 uM	24 h	3	100	0.25	0.159882	1	1	1	1	0	Adrenergic receptor antagonist	ADRB1|ADRB2	-0.3602	0.704	-1.3929
REP.A013_PC3_24H:C13	BRD-A37959677	estrone	PC3	trt_cp	10 uM	24 h	2	93	0.1397	0.115258	1	0	1	1	0	Estrogen receptor agonist|Estrogenic hormone	ESR1|ESR2	-0.3602	0.7025	-1.3927
REP.A002_A549_24H:J08	BRD-K17203476	LY-2874455	A549	trt_cp	3.33 uM	24 h	3	390	0.5554	0.470615	0	0	1	1	0	FGFR inhibitor	FGFR1|FGFR3|FGFR2|FGFR4|KDR	-0.3601	0.7025	-1.3924
CPC016_A549_24H:BRD-K42221274-003-02-8:10	BRD-K42221274	NNC-711	A549	trt_cp	10 uM	24 h	2	73	0.23	0.131026	0	0	1	1	0	GAT inhibitor	SLC6A1|SIGMAR1	-0.36	0.7025	-1.392
CPC015_ASC_24H:BRD-K30296925-001-02-1:10	BRD-K30296925	flavokavain-b	ASC	trt_cp	10 uM	24 h	4	229	0.21	0.221747	0	0	1	1	0	Carcinogen	IKBKB	-0.36	0.7025	-1.392
REP.B011_A549_24H:A18	BRD-A03623303	metoprolol	A549	trt_cp	0.01 uM	24 h	2	92	0.0719	0.0822411	0	0	1	1	0	Adrenergic receptor antagonist	ADRB1|ADRB2	-0.36	0.7025	-1.3919
REP.B015_PC3_24H:L07	BRD-K59331299	voglibose	PC3	trt_cp	2.22 uM	24 h	2	56	0.0146	0.0289135	1	1	1	1	0	Glucosidase inhibitor	GAA|MGAM	-0.36	0.7025	-1.3919
AICHI001_OCILY3_24H:P17	BRD-K93468883	IPI-145	OCILY3	trt_cp	0.04 uM	24 h	3	79	0.34	0.165723	1	1	1	1	0	PI3K inhibitor	PIK3CD|PIK3CG|PIK3CA|PIK3CB	-0.36	0.7025	-1.3919
CPC017_HT29_6H:BRD-A04668240-001-01-5:10	BRD-A04668240	CGP-52432	HT29	trt_cp	10 uM	6 h	5	240	0.19	0.21593	0	0	1	1	0	GABA receptor antagonist	GABBR1	-0.36	0.7025	-1.3919
LJP001_SKBR3_24H:J21	BRD-K41895714	AS-605240	SKBR3	trt_cp	0.37 uM	24 h	4	110	0.3029	0.184577	1	1	1	1	0	PI3K inhibitor	PIK3CG	-0.3598	0.7025	-1.3914
PAC005_U2OS_6H:BRD-A55913614-316-04-7:10	BRD-A55913614	primaquine	U2OS	trt_cp	10 uM	6 h	2	91	0.04	0.0610072	1	0	1	1	0	Antimalarial|DNA inhibitor	KRT7|NQO2	-0.3597	0.7025	-1.3909
REP.B021_MDAMB231_24H:A23	BRD-K19111024	clofibric-acid	MDAMB231	trt_cp	0.03 uM	24 h	2	202	0.252	0.228143	0	0	1	1	0	PPAR receptor agonist	PPARA	-0.3597	0.7025	-1.3909
REP.B021_HA1E_24H:I08	BRD-K83794243	palovarotene	HA1E	trt_cp	0.74 uM	24 h	2	88	0.3457	0.176369	1	1	1	1	0	Retinoid receptor agonist	RARG	-0.3597	0.7025	-1.3908
CPC017_PHH_24H:BRD-A27143604-001-01-2:10	BRD-A27143604	dpn	PHH	trt_cp	10 uM	24 h	3	93	0.12	0.106822	0	0	1	1	0	Estrogen receptor agonist	ESR2	-0.3597	0.7025	-1.3908
CPC016_NPC_24H:BRD-K38477985-001-01-8:10	BRD-K38477985	malonoben	NPC	trt_cp	10 uM	24 h	2	662	0.77	0.721946	0	0	1	1	0	Protein tyrosine kinase inhibitor	EGFR	-0.3597	0.7025	-1.3907
REP.B026_YAPC_24H:E20	BRD-K89348303	ramipril	YAPC	trt_cp	0.74 uM	24 h	2	53	0.1627	0.0938993	1	0	1	1	0	ACE inhibitor	ACE	-0.3597	0.7025	-1.3907
REP.B009_HA1E_24H:M19	BRD-A33692381	zidovudine	HA1E	trt_cp	2.22 uM	24 h	2	76	0.0607	0.0686802	1	0	1	1	0	Reverse transcriptase inhibitor	TERT	-0.3597	0.7025	-1.3907
CPC005_HT29_6H:BRD-A08003242-001-02-7:10	BRD-A08003242	rhodomyrtoxin-b	HT29	trt_cp	10 uM	6 h	3	103	0.36	0.194715	1	1	1	1	0	Carcinogen|DNA intercalating agent	SLCO1B3	-0.3597	0.7025	-1.3907
CPC003_HCC515_6H:BRD-K76805682-001-05-0:10	BRD-K76805682	SB-415286	HCC515	trt_cp	10 uM	6 h	3	140	0.27	0.196597	1	1	1	1	0	GSK inhibitor	GSK3B|GSK3A|RPS6KB1	-0.3596	0.7023	-1.3904
REP.A014_YAPC_24H:L09	BRD-K37714784	ABT-724	YAPC	trt_cp	1.11 uM	24 h	2	54	0.1072	0.0769352	1	0	1	1	0	Dopamine receptor agonist	DRD4	-0.3595	0.6976	-1.3902
ASG002_A549_24H:P02	BRD-K03067624	emetine	A549	trt_cp	1.11 uM	24 h	2	614	0.5851	0.60608	0	0	1	1	0	Protein synthesis inhibitor	RPS2	-0.3595	0.6979	-1.3902
REP.A013_HELA_24H:C13	BRD-A37959677	estrone	HELA	trt_cp	10 uM	24 h	3	551	0.8059	0.673825	0	0	1	1	0	Estrogen receptor agonist|Estrogenic hormone	ESR1|ESR2	-0.3595	0.6963	-1.3901
CPC005_A549_24H:BRD-A37776212-003-02-5:10	BRD-A37776212	ICI-204448	A549	trt_cp	10 uM	24 h	3	80	0.11	0.0948576	1	0	1	1	0	Opioid receptor agonist	OPRK1	-0.3595	0.6949	-1.39
REP.A011_HELA_24H:M07	BRD-K07237224	moclobemide	HELA	trt_cp	10 uM	24 h	3	65	0.1805	0.109528	0	0	1	1	0	Monoamine oxidase inhibitor	MAOA|CYP2C19|MAOB	-0.3595	0.6949	-1.39
LJP008_HEK293_24H:G19	BRD-K03406345	azacitidine	HEK293	trt_cp	10 uM	24 h	2	454	0.766	0.596311	0	0	1	1	0	DNA inhibitor	DNMT1|DNMT3A	-0.3595	0.6949	-1.39
CPC016_NPC_24H:BRD-K69600043-328-03-0:10	BRD-K69600043	thiethylperazine	NPC	trt_cp	10 uM	24 h	4	173	0.1	0.133001	0	0	1	1	0	Dopamine receptor antagonist	DRD1|DRD2|DRD4	-0.3595	0.695	-1.39
AICHI001_HBL1_24H:F19	BRD-K13646352	midostaurin	HBL1	trt_cp	10 uM	24 h	3	178	0.48	0.295571	0	0	1	1	0	FLT3 inhibitor|KIT inhibitor|PKC inhibitor	FLT3|KIT|CCNB1|FLT1|KDR|PDGFRB|PRKCA|VEGFA|PRKCG	-0.3594	0.6939	-1.3898
CPC006_A549_6H:BRD-A56592690-001-01-9:30	BRD-A56592690	PX-12	A549	trt_cp	30 uM	6 h	4	234	0.47	0.335342	1	1	1	1	0	Thioredoxin inhibitor	TXN|TXNRD1|TXNRD2	-0.3594	0.694	-1.3898
LIVB002_HUH7_72H:I05	BRD-A25234499	aminoglutethimide	HUH7	trt_cp	15 uM	72 h	3	109	0.07	0.0883269	0	0	1	1	0	Glucocorticoid receptor antagonist	CYP19A1|CYP11A1|NR3C1	-0.3594	0.6913	-1.3896
REP.A012_THP1_24H:J21	BRD-K02314383	epitiostanol	THP1	trt_cp	1.11 uM	24 h	3	108	0.0796	0.093756	1	0	1	1	0	Androgen receptor agonist	AR	-0.3593	0.6901	-1.3894
CPC012_HA1E_6H:BRD-K18855837-046-01-4:10	BRD-K18855837	varenicline	HA1E	trt_cp	10 uM	6 h	3	252	0.31	0.282626	1	0	1	1	0	Acetylcholine receptor agonist	CHRNA4|CHRNB2|CHRNA3|CHRNA6|CHRNA7	-0.3593	0.6901	-1.3894
CPC004_HA1E_24H:BRD-K09631521-001-05-7:10	BRD-K09631521	thiotepa	HA1E	trt_cp	10 uM	24 h	3	176	0.35	0.250969	1	1	1	1	0	Cytochrome P450 inhibitor	CYP2B6|CYP3A4	-0.3593	0.6898	-1.3892
REP.A024_A375_24H:M13	BRD-K78567475	dolastatin-10	A375	trt_cp	10 uM	24 h	3	635	0.8249	0.731843	1	1	1	1	0	Tubulin inhibitor|Immunostimulant	TUBB	-0.3593	0.6898	-1.3892
REP.A010_HELA_24H:A11	BRD-K11973162	tipiracil	HELA	trt_cp	0.125 uM	24 h	3	82	0.2068	0.131678	0	0	1	1	0	Thymidine phosphorylase inhibitor	TYMP	-0.3592	0.6898	-1.3889
REP.A026_HT29_24H:O24	BRD-A20348246	chlormezanone	HT29	trt_cp	0.04 uM	24 h	3	126	0.1454	0.136867	0	0	1	1	0	GABA receptor antagonist	GABRA1|TSPO	-0.3591	0.6898	-1.3887
LJP006_HME1_24H:B07	BRD-K23984367	sorafenib	HME1	trt_cp	10 uM	24 h	2	437	0.6484	0.538261	0	0	1	1	0	RAF inhibitor|FLT3 inhibitor|KIT inhibitor|PDGFR inhibitor|RET inhibitor|VEGFR inhibitor	RET|BRAF|FLT3|KDR|RAF1|FLT1|FLT4|KIT|DDR2|PDGFRB|FGFR1|CYP2B6|CYP2C8|CYP3A5|PDGFB|SLCO1B3	-0.3591	0.6898	-1.3886
CPC015_PHH_24H:BRD-A51820102-008-16-4:10	BRD-A51820102	econazole	PHH	trt_cp	10 uM	24 h	2	138	0.18	0.15937	0	0	1	1	0	Lanosterol demethylase inhibitor|Bacterial cell wall synthesis inhibitor|Sterol demethylase inhibitor	CYP51A1|NPY1R|NPY2R|TRPM2|TRPV5	-0.3591	0.6898	-1.3884
REP.A025_MCF7_24H:C02	BRD-K98624455	bepotastine	MCF7	trt_cp	3.33 uM	24 h	3	124	0.3686	0.216182	1	1	1	1	0	Histamine receptor antagonist	HRH1	-0.3591	0.6898	-1.3884
CVD001_PHH_24H:BRD-K58299615-001-02-7:10	BRD-K58299615	Ro-90-7501	PHH	trt_cp	10 uM	24 h	3	276	0.4	0.335981	0	0	1	1	0	Beta amyloid inhibitor	APP	-0.3591	0.6898	-1.3883
LJP009_NEU_24H:K04	BRD-K70511574	HMN-214	NEU	trt_cp	0.37 uM	24 h	3	249	0.3587	0.302201	0	0	1	1	0	PLK inhibitor	FLT3|KDR|KIT|FLT4|PDGFRB|CSF1R|FLT1|RET|FGFR1|PDGFRA	-0.359	0.6897	-1.3881
LJP007_CD34_24H:P08	BRD-K12040459	AT-7867	CD34	trt_cp	3.33 uM	24 h	3	149	0.468	0.267022	1	1	1	1	0	AKT inhibitor	AKT2|ROCK2|GSK3B|PKIA|PRKACA	-0.359	0.6895	-1.388
CPC006_NOMO1_6H:BRD-K55966568-001-01-3:6	BRD-K55966568	orantinib	NOMO1	trt_cp	6.66 uM	6 h	2	695	0.64	0.674393	1	1	1	1	0	PDGFR inhibitor|FGFR inhibitor|VEGFR inhibitor	KDR|PDGFRB|FGFR1|AURKA|AURKB|PDGFRA|TBK1|EGFR|FGFR2	-0.3589	0.6858	-1.3878
LKCP002_A549_48H:D14	BRD-K17953908	LY-2886721	A549	trt_cp	1.11 uM	48 h	5	119	0.2934	0.188944	1	0	1	1	0	Beta secretase inhibitor	BACE1|BACE2	-0.3589	0.6859	-1.3878
CPC014_VCAP_24H:BRD-K84085265-001-01-3:10	BRD-K84085265	CG-930	VCAP	trt_cp	10 uM	24 h	5	157	0.32	0.22665	0	0	1	1	0	JNK inhibitor	MAPK8	-0.3589	0.6857	-1.3877
CPC017_PHH_24H:BRD-K07691486-001-04-9:10	BRD-K07691486	roscovitine	PHH	trt_cp	10 uM	24 h	3	228	0.25	0.241417	0	0	1	1	0	CDK inhibitor	CDK2|CDK9|CDK7|CDK1|CDK5	-0.3589	0.6856	-1.3876
REP.A003_HT29_24H:N13	BRD-K35687421	gimeracil	HT29	trt_cp	10 uM	24 h	3	107	0.1011	0.105171	0	0	1	1	0	Dihydropyrimidine dehydrogenase inhibitor	DPYD	-0.3589	0.6856	-1.3876
LJP006_HME1_24H:D01	BRD-K13566078	BMS-345541	HME1	trt_cp	10 uM	24 h	2	624	0.7468	0.69028	0	0	1	1	0	IKK inhibitor	IKBKB|CHUK	-0.3588	0.6856	-1.3874
CPC005_MCF7_6H:A24	BRD-A65767837	hydrocortisone-acetate	MCF7	trt_cp	10 uM	6 h	3	213	0.2692	0.242135	1	0	1	1	0	Corticosteroid agonist|Glucocorticoid receptor agonist	NR3C1|NR3C2	-0.3588	0.6856	-1.3873
CPC014_HCC515_6H:BRD-A36707673-001-01-9:10	BRD-A36707673	BRD-A36707673	HCC515	trt_cp	10 uM	6 h	3	66	0.19	0.113235	1	0	1	1	0	LXR agonist	NR1H3|NR1H2	-0.3587	0.6856	-1.387
CPC017_A549_6H:BRD-K14618467-003-01-8:10	BRD-K14618467	IKK-16	A549	trt_cp	10 uM	6 h	3	437	0.71	0.563249	1	1	1	1	0	IKK inhibitor	IKBKB	-0.3587	0.6856	-1.3869
REP.A001_A375_24H:E01	BRD-K26603252	PD-153035	A375	trt_cp	10 uM	24 h	3	285	0.4286	0.35341	1	1	1	1	0	EGFR inhibitor	EGFR|KDR	-0.3587	0.6856	-1.3869
CPC018_PHH_24H:BRD-K39965020-001-03-4:10	BRD-K39965020	doconexent	PHH	trt_cp	10 uM	24 h	3	57	0.23	0.11578	0	0	1	1	0	PPAR receptor agonist	PPARA|FFAR1|PTGS1|PTGS2	-0.3587	0.6856	-1.3868
REP.A028_HT29_24H:N07	BRD-A96754982	tacrolimus	HT29	trt_cp	10 uM	24 h	2	159	0.1433	0.152634	0	0	1	1	0	Calcineurin inhibitor	FKBP1A|CYP3A5|CYP3A7	-0.3586	0.6856	-1.3867
REP.B008_MCF10A_24H:I07	BRD-K91290917	amodiaquine	MCF10A	trt_cp	2.22 uM	24 h	2	98	0.1414	0.119033	0	0	1	1	0	Histamine receptor agonist	HNMT|CYP2C8	-0.3586	0.6855	-1.3866
CPC006_HCC515_6H:E03	BRD-K48692744	NU-1025	HCC515	trt_cp	10 uM	6 h	3	79	0.0621	0.0708255	1	0	1	1	0	PARP inhibitor|DNA dependent protein kinase inhibitor	PARP1	-0.3586	0.6854	-1.3865
LJP002_MDAMB231_6H:BRD-K75308783-001-02-1:10	BRD-K75308783	SAR-245409	MDAMB231	trt_cp	10 uM	6 h	3	392	0.46	0.429391	0	0	1	1	0	PI3K inhibitor	MTOR|PIK3CG	-0.3586	0.6854	-1.3865
MOAR003_A375_24H:O21	BRD-K26997899	D-64131	A375	trt_cp	1.11 uM	24 h	3	422	0.75	0.568876	1	1	1	1	0	Tubulin inhibitor	TUBB	-0.3585	0.6832	-1.3861
LIVB001_HUH7_72H:M05	BRD-A79672927	tropicamide	HUH7	trt_cp	12 uM	72 h	3	96	0.07	0.0828925	0	0	1	1	0	Acetylcholine receptor antagonist	CHRM3|CHRM4|CHRM1|CHRM2	-0.3584	0.6832	-1.3859
REP.B023_HT29_24H:K22	BRD-K71106091	fludarabine-phosphate	HT29	trt_cp	0.08 uM	24 h	2	72	0.1129	0.0911683	1	1	1	1	0	DNA inhibitor|DNA repair enzyme inhibitor|Purine antagonist	POLA1|RRM1|DCK|POLD1|POLE|RRM2|RRM2B	-0.3584	0.6832	-1.3857
CPC016_ASC_24H:BRD-K81729199-001-01-0:10	BRD-K81729199	AQ-RA741	ASC	trt_cp	10 uM	24 h	3	122	0.3	0.193451	1	0	1	1	0	Acetylcholine receptor antagonist	CHRM2	-0.3584	0.6832	-1.3857
CPC015_ASC_24H:BRD-A40639672-234-09-9:10	BRD-A40639672	ketorolac	ASC	trt_cp	10 uM	24 h	4	194	0.21	0.204099	0	0	1	1	0	Cyclooxygenase inhibitor	PTGS1|PTGS2	-0.3584	0.6832	-1.3856
CPC016_SKB_24H:BRD-K33211335-337-03-7:10	BRD-K33211335	BRD-K33211335	SKB	trt_cp	10 uM	24 h	3	289	0.28	0.287646	0	0	1	1	0	Glutamate receptor antagonist|Sigma receptor agonist	SIGMAR1|CYP3A5|GRIN1|CHRNA2|CHRNA3|CHRNA4|CHRNA7|CHRNB2|CHRNB4|CYBA|CYBB|GRIN3A|NCF1|NCF2|NCF4|OPRD1|OPRK1|OPRM1|PGRMC1|RAC1|RAC2|SLC6A2|SLC6A4	-0.3583	0.6831	-1.3855
CPC006_HCC515_6H:B10	BRD-K92241597	tosedostat	HCC515	trt_cp	80 uM	6 h	2	108	0.3542	0.197773	1	1	1	1	0	Peptidase inhibitor	ANPEP|NPEPPS|LAP3	-0.3583	0.6831	-1.3855
REP.A022_HT29_24H:P10	BRD-A82035391	tolvaptan	HT29	trt_cp	0.37 uM	24 h	3	70	0.2098	0.122541	1	1	1	1	0	Vasopressin receptor antagonist	AVPR2|AVPR1A	-0.3583	0.6828	-1.3854
LJP007_ASC.C_24H:A15	BRD-K66538826	amuvatinib	ASC	trt_cp	1.11 uM	24 h	3	457	0.6227	0.539421	1	1	1	1	0	FLT3 inhibitor|KIT inhibitor|PDGFR inhibitor|RAD51 inhibitor|RET tyrosine kinase inhibitor	KIT|FLT3|MET|PDGFRA|AXL|MST1R|RAD51|RET	-0.3583	0.6793	-1.3853
REP.B005_MCF7_24H:H08	BRD-K09372874	merimepodib	MCF7	trt_cp	0.74 uM	24 h	2	118	0.3583	0.207919	1	1	1	1	0	Inosine monophosphate dehydrogenase inhibitor	IMPDH1	-0.3583	0.6818	-1.3853
CPC017_SKB_24H:BRD-A93236127-001-03-7:10	BRD-A93236127	digitoxin	SKB	trt_cp	10 uM	24 h	2	405	0.74	0.553572	0	0	1	1	0	Na/K-ATPase inhibitor	ATP1A1	-0.3582	0.6776	-1.3852
CPC015_ASC_24H:BRD-K37991163-003-06-8:10	BRD-K37991163	paroxetine	ASC	trt_cp	10 uM	24 h	4	226	0.27	0.249785	0	0	1	1	0	Selective serotonin reuptake inhibitor (SSRI)	SLC6A4|CHRM1|CHRM2|CHRM3|CHRM4|CHRM5|HTR2A|SLC6A2	-0.3583	0.6779	-1.3852
CPC018_HEPG2_6H:BRD-K39965020-001-03-4:10	BRD-K39965020	doconexent	HEPG2	trt_cp	10 uM	6 h	3	167	0.12	0.143146	1	0	1	1	0	PPAR receptor agonist	PPARA|FFAR1|PTGS1|PTGS2	-0.3581	0.6743	-1.3846
MOAR003_PC3_24H:D06	BRD-K81548480	AC-264613	PC3	trt_cp	1.11 uM	24 h	2	85	0.1308	0.106621	1	1	1	1	0	PAR agonist	F2RL1	-0.3581	0.6743	-1.3845
CPC015_MCF7_24H:BRD-K33818169-003-01-2:10	BRD-K33818169	GW-3965	MCF7	trt_cp	10 uM	24 h	5	175	0.25	0.211504	1	1	1	1	0	LXR agonist|ABC transporter expression enhancer	NR1H2|NR1H3|ABCA1	-0.358	0.6743	-1.3844
LPROT004_YAPC_6H:BRD-A67788537:10	BRD-A67788537	salermide	YAPC	trt_cp	10 uM	6 h	3	197	0.59	0.344738	1	1	1	1	0	SIRT inhibitor	SIRT1|SIRT2	-0.3579	0.6743	-1.384
LJP006_HS578T_24H:P02	BRD-K56751279	Y-39983	HS578T	trt_cp	3.33 uM	24 h	3	106	0.37	0.200255	1	1	1	1	0	Rho associated kinase inhibitor	ROCK1|ROCK2	-0.3579	0.6743	-1.3839
CPC015_HT29_6H:BRD-A02759312-003-11-2:10	BRD-A02759312	betaxolol	HT29	trt_cp	10 uM	6 h	3	137	0.13	0.134947	1	0	1	1	0	Adrenergic receptor antagonist	ADRB1|ADRB2	-0.3579	0.6743	-1.3838
CPC013_SKB_24H:BRD-K17743125-001-03-5:10	BRD-K17743125	belinostat	SKB	trt_cp	10 uM	24 h	4	403	0.65	0.517535	0	0	1	1	0	HDAC inhibitor	HDAC1|HDAC2|HDAC3|HDAC4|HDAC5|HDAC6|HDAC7|HDAC8|HDAC9|HDAC10|HDAC11	-0.3579	0.6743	-1.3838
REP.A004_MCF7_24H:O24	BRD-K27184429	levocetirizine	MCF7	trt_cp	0.04 uM	24 h	3	98	0.224	0.149819	0	0	1	1	0	Histamine receptor antagonist	HRH1|CXCL8	-0.3578	0.6743	-1.3835
CPC016_NEU_24H:BRD-K88358234-003-01-4:10	BRD-K88358234	xaliproden	NEU	trt_cp	10 uM	24 h	3	264	0.13	0.187329	0	0	1	1	0	Serotonin receptor agonist	HTR1A	-0.3578	0.6743	-1.3834
CPC009_HA1E_6H:BRD-A22256192-001-14-8:10	BRD-A22256192	terazosin	HA1E	trt_cp	10 uM	6 h	3	212	0.18	0.197531	1	0	1	1	0	Adrenergic receptor antagonist	ADRA1D|ADRA1A|ADRA1B|KCNH2|KCNH6|KCNH7	-0.3577	0.6743	-1.3831
CPC015_SKB_24H:BRD-K15409150-001-01-7:10	BRD-K15409150	penfluridol	SKB	trt_cp	10 uM	24 h	2	147	0.15	0.150153	0	0	1	1	0	Calcium channel blocker	DRD1|DRD2|CACNA1G	-0.3577	0.6743	-1.3831
CPC017_A549_6H:BRD-K11927976-050-01-1:10	BRD-K11927976	ER-27319	A549	trt_cp	10 uM	6 h	3	586	0.74	0.665879	1	1	1	1	0	Syk inhibitor	SYK	-0.3576	0.6743	-1.3829
CPC003_HA1E_6H:BRD-K69837166-003-01-2:10	BRD-K69837166	trap-101	HA1E	trt_cp	10 uM	6 h	2	77	0.36	0.168355	1	0	1	1	0	Opioid receptor antagonist|Nociceptin/orphanin FQ (NOP) receptor antagonist	OPRL1	-0.3577	0.6743	-1.3829
REP.A010_HELA_24H:P13	BRD-K15409150	penfluridol	HELA	trt_cp	10 uM	24 h	2	712	0.8368	0.780515	0	0	1	1	0	Calcium channel blocker	DRD1|DRD2|CACNA1G	-0.3576	0.6743	-1.3828
CPC016_A375_6H:BRD-A22684332-003-03-1:10	BRD-A22684332	procaterol	A375	trt_cp	10 uM	6 h	5	296	0.29	0.296262	1	1	1	1	0	Adrenergic receptor agonist	ADRB2	-0.3576	0.6743	-1.3827
REP.A001_PC3_24H:N09	BRD-K29656036	MK-8245	PC3	trt_cp	1.11 uM	24 h	3	132	0.2185	0.171729	1	1	1	1	0	Stearoyl-CoA desaturase inhibitor	SCD	-0.3576	0.6743	-1.3827
CPC018_SKB_24H:BRD-K03981224-001-02-9:10	BRD-K03981224	ethisterone	SKB	trt_cp	10 uM	24 h	3	208	0.19	0.20102	1	0	1	1	0	Progestogen hormone	TYR	-0.3576	0.6743	-1.3826
CPC001_HCC515_6H:BRD-A96485169-001-05-1:10	BRD-A96485169	EBPC	HCC515	trt_cp	10 uM	6 h	2	87	0.16	0.119303	1	0	1	1	0	Aldose reductase inhibitor	AKR1B1	-0.3575	0.6743	-1.3825
CPC006_THP1_6H:K18	BRD-K08478539	SMER-28	THP1	trt_cp	10 uM	6 h	2	125	0.0622	0.0891622	1	0	1	1	0	Autophagy inducer	SNCA	-0.3575	0.6743	-1.3824
CPC005_A549_6H:BRD-A79226577-003-01-1:10	BRD-A79226577	tropisetron	A549	trt_cp	10 uM	6 h	3	75	0.04	0.0553849	1	0	1	1	0	Serotonin receptor antagonist	HTR3A|GLRA1|GLRA2|GLRB|HTR4	-0.3575	0.6743	-1.3822
LJP008_CD34_24H:G19	BRD-K03406345	azacitidine	CD34	trt_cp	10 uM	24 h	3	421	0.6939	0.546538	0	0	1	1	0	DNA inhibitor	DNMT1|DNMT3A	-0.3575	0.6743	-1.3821
LJP008_HA1E_24H:H02	BRD-K21906513	UNC-669	HA1E	trt_cp	3.33 uM	24 h	2	64	0.0724	0.0688319	1	0	1	1	0	L3MBTL antagonist	L3MBTL1|L3MBTL3	-0.3574	0.6743	-1.382
CPC016_ASC_24H:BRD-K41337261-003-01-0:10	BRD-K41337261	ZM-306416	ASC	trt_cp	10 uM	24 h	3	440	0.63	0.532387	0	0	1	1	0	Abl inhibitor|Src inhibitor|VEGFR inhibitor	FLT1|KDR|EGFR|FLT4	-0.3574	0.6743	-1.382
PBIOA015_A375_24H:G19	BRD-K79877282	PF-543	A375	trt_cp	10 uM	24 h	3	175	0.27	0.219802	1	1	1	1	0	Sphingosine kinase inhibitor	SPHK1	-0.3574	0.6743	-1.3818
CPC006_SW480_6H:BRD-K70642949-001-01-1:0.1	BRD-K70642949	GSK-2334470	SW480	trt_cp	0.12 uM	6 h	2	72	0.18	0.115115	0	0	1	1	0	PDK inhibitor	PDPK1|AURKA|AURKB|PDK1	-0.3574	0.6743	-1.3818
NMH002_NPC_6H:BRD-K13005598-001-01-5:10	BRD-K13005598	foxy-5	NPC	trt_cp	10 uM	6 h	3	139	0.25	0.188499	0	0	1	1	0	WNT inhibitor	WNT5A	-0.3573	0.6743	-1.3817
CPC006_U937_6H:BRD-A62182663-001-01-4:10	BRD-A62182663	YK-4279	U937	trt_cp	10 uM	6 h	2	213	0.31	0.259837	0	0	1	1	0	Apoptosis stimulant|ETV1 inhibitor	EWSR1|FLI1|DHX9	-0.3573	0.6743	-1.3816
CPC018_HT29_6H:BRD-K17796732-001-02-0:10	BRD-K17796732	JWH-015	HT29	trt_cp	10 uM	6 h	5	154	0.2	0.177462	1	0	1	1	0	Cannabinoid receptor agonist	CNR2	-0.3573	0.6743	-1.3814
CPC015_PHH_24H:BRD-K38197229-001-17-4:10	BRD-K38197229	bumetanide	PHH	trt_cp	10 uM	24 h	2	410	0.16	0.25899	0	0	1	1	0	Solute carrier family member inhibitor	SLC12A1|SLC12A2|CFTR|GPR35|SLC12A4|SLC12A5	-0.3573	0.6743	-1.3814
CPC018_PHH_24H:BRD-K65503129-001-04-8:10	BRD-K65503129	CCT-018159	PHH	trt_cp	10 uM	24 h	3	95	0.09	0.0935004	0	0	1	1	0	HSP inhibitor	HSP90AA1|HSP90AB1	-0.3572	0.6743	-1.3813
CPC005_HA1E_24H:BRD-A52660433-066-01-3:10	BRD-A52660433	tetrindole	HA1E	trt_cp	10 uM	24 h	3	319	0.51	0.40786	1	1	1	1	0	Monoamine oxidase inhibitor	MAOA	-0.3572	0.6743	-1.3813
CPC011_A549_24H:BRD-K18895904-001-11-2:10	BRD-K18895904	olanzapine	A549	trt_cp	10 uM	24 h	3	137	0.29	0.201553	1	0	1	1	0	Dopamine receptor antagonist|Serotonin receptor antagonist	DRD2|HTR2A|HTR2C|DRD3|DRD4|DRD1|HRH1|HTR1A|HTR1B|HTR1D|HTR1E|HTR6|HTR7|CYP2C8|ADRA1A|ADRA1B|ADRA2A|ADRA2B|ADRA2C|ADRB1|ADRB2|ADRB3|CHRM1|CHRM2|CHRM3|CHRM4|CHRM5|DRD5|GABRA1|GABRA2|GABRA3|GABRA4|GABRA5|GABRA6|GABRB1|GABRB2|GABRB3|GABRD|GABRE|GABRG1|GABRG2|GABRG3|GABRP|GABRQ|HRH2|HRH4|HTR1F|HTR2B|HTR3A|HTR5A	-0.3572	0.6743	-1.3812
REP.B022_A375_24H:I18	BRD-K72222507	quinapril	A375	trt_cp	0.01 uM	24 h	2	215	0.1396	0.175183	0	0	1	1	0	ACE inhibitor	ACE	-0.3572	0.6743	-1.3811
CPC006_HA1E_24H:H11	BRD-K48923948	BMS-641988	HA1E	trt_cp	12 uM	24 h	3	127	0.0907	0.108527	1	0	1	1	0	Androgen receptor antagonist	AR	-0.3572	0.6743	-1.3811
CPC006_NCIH2073_6H:BRD-K09778810-001-03-1:10	BRD-K09778810	FGIN-1-27	NCIH2073	trt_cp	10 uM	6 h	2	61	0.07	0.0660761	0	0	1	1	0	Inositol monophosphatase inhibitor	TSPO	-0.3571	0.6743	-1.3809
MUC.CP008_HA1E_24H:E01	BRD-K73397362	purmorphamine	HA1E	trt_cp	10 uM	24 h	3	284	0.44	0.357451	1	1	1	1	0	Smoothened receptor agonist	SMO|DHH|IHH|PTCH1	-0.3571	0.6743	-1.3809
REP.B005_MCF7_24H:J23	BRD-A10012892	argatroban	MCF7	trt_cp	0.03 uM	24 h	2	119	0.2065	0.158513	1	1	1	1	0	Thrombin inhibitor	F2|CYP3A5	-0.3571	0.6743	-1.3808
CPC020_HA1E_6H:BRD-A09472452-015-19-2:10	BRD-A09472452	flecainide	HA1E	trt_cp	10 uM	6 h	3	97	0.2	0.140842	1	0	1	1	0	Sodium channel inhibitor	SCN5A|KCNA5|KCNA7|SCN4A	-0.3571	0.6743	-1.3806
MOAR003_PC3_24H:A21	BRD-K37237504	CEP-33779	PC3	trt_cp	1.11 uM	24 h	2	126	0.4231	0.233473	1	1	1	1	0	JAK inhibitor	JAK2	-0.357	0.6743	-1.3805
REP.B014_HA1E_24H:G08	BRD-K59524082	maribavir	HA1E	trt_cp	0.74 uM	24 h	2	65	0.3199	0.145812	1	1	1	1	0	Protein kinase inhibitor	PYGM	-0.357	0.6743	-1.3805
CPC014_ASC_24H:BRD-K62012036-001-06-0:10	BRD-K62012036	acitretin	ASC	trt_cp	10 uM	24 h	3	76	0.22	0.130752	0	0	1	1	0	Retinoid receptor agonist	RARA|RXRG|RARB|RARG|RBP1|RXRA|RXRB|STAT3	-0.357	0.6743	-1.3804
REP.A028_YAPC_24H:O13	BRD-K97440753	BRD-K97440753	YAPC	trt_cp	10 uM	24 h	2	136	0.2322	0.179693	0	0	1	1	0	Adrenergic receptor antagonist|Prolactin inhibitor	HTR2A|ADRA1A|ADRB1|DRD1|DRD2|DRD3|DRD4|DRD5|HTR1A|HTR3A|HTR4|HTR5A|HTR6|HTR7	-0.357	0.6743	-1.3804
REP.A021_MCF10A_24H:M01	BRD-K85119730	tolbutamide	MCF10A	trt_cp	10 uM	24 h	2	90	0.1988	0.135257	1	1	1	1	0	ATP channel blocker	ABCC8|KCNJ11|CYP2B6|CYP2C19|CYP2C8|KCNJ1|KCNJ8	-0.357	0.6743	-1.3803
CPC017_PHH_24H:BRD-K90524085-001-06-0:10	BRD-K90524085	MY-5445	PHH	trt_cp	10 uM	24 h	3	219	0.38	0.291705	0	0	1	1	0	Phosphodiesterase inhibitor|Platelet aggregation inhibitor	PDE5A	-0.357	0.6743	-1.3803
CPD002_MCF7_24H:BRD-K17041687-001-01-8:10	BRD-K17041687	diflorasone	MCF7	trt_cp	10 uM	24 h	3	46	0.03	0.0375639	1	0	1	1	0	Glucocorticoid receptor agonist	NR3C1	-0.357	0.6743	-1.3802
REP.A017_HA1E_24H:E01	BRD-A50311610	meclizine	HA1E	trt_cp	10 uM	24 h	3	115	0.2674	0.177321	1	1	1	1	0	Constitutive androstane receptor (CAR) agonist	NR1I3|HRH1	-0.357	0.6743	-1.3802
CPC015_A549_24H:BRD-K07507905-236-01-8:10	BRD-K07507905	BRL-37344	A549	trt_cp	10 uM	24 h	3	155	0.22	0.186727	1	0	1	1	0	Adrenergic receptor agonist	ADRB3|ADRB1|ADRB2	-0.3569	0.6743	-1.38
CPC014_SKB_24H:BRD-K81528515-001-03-9:10	BRD-K81528515	nilotinib	SKB	trt_cp	10 uM	24 h	4	156	0.08	0.112963	0	0	1	1	0	Bcr-Abl inhibitor|Abl inhibitor	ABL1|KIT|BCR|CYP2B6|CYP2C8|DDR1|DDR2|PDGFRA	-0.3569	0.6743	-1.38
CPC014_VCAP_6H:BRD-K85985071-001-20-7:10	BRD-K85985071	ellipticine	VCAP	trt_cp	10 uM	6 h	5	284	0.37	0.327786	0	0	1	1	0	Topoisomerase inhibitor	TOP2A|TOP2B	-0.3569	0.6743	-1.3799
EMU001_NALM6_24H:B24	BRD-A50998626	palomid-529	NALM6	trt_cp	0.01 uM	24 h	3	319	0.364	0.344569	1	0	1	1	0	AKT inhibitor|FGFR inhibitor|MTOR inhibitor|VEGFR inhibitor	MTOR|FGF2	-0.3569	0.6743	-1.3799
ERG011_VCAP_6H:BRD-A34806832-001-10-0:0.4	BRD-A34806832	proscillaridin	VCAP	trt_cp	0.37 uM	6 h	2	122	0.46	0.239546	1	1	1	1	0	Na/K-ATPase inhibitor	ATP1A1	-0.3569	0.6743	-1.3798
CPC006_U937_6H:BRD-K40892394-001-01-9:11.1	BRD-K40892394	AR-C133057XX	U937	trt_cp	12 uM	6 h	2	54	0.09	0.0704934	1	0	1	1	0	Nitric oxide synthase inhibitor	NOS2	-0.3568	0.6743	-1.3797
REP.B024_PC3_24H:D12	BRD-K74195153	irsogladine	PC3	trt_cp	0.01 uM	24 h	2	155	0.1627	0.16058	0	0	1	1	0	Phosphodiesterase inhibitor	PDE4A	-0.3568	0.6743	-1.3796
LJP007_CD34_24H:B12	BRD-K22096725	ALW-II-49-7	CD34	trt_cp	0.04 uM	24 h	3	103	0.2037	0.146469	1	0	1	1	0	Ephrin inhibitor	DDR1	-0.3568	0.6743	-1.3795
LJP007_HEPG2_24H:J24	BRD-K74065929	doramapimod	HEPG2	trt_cp	0.04 uM	24 h	2	181	0.6348	0.342759	0	0	1	1	0	P38 MAPK inhibitor	MAPK14|MAPK11|MAPK12|DDR2|MAPK13	-0.3568	0.6743	-1.3795
CPC016_HEPG2_6H:BRD-K97061094-001-03-2:10	BRD-K97061094	azacyclonol	HEPG2	trt_cp	10 uM	6 h	3	108	0.05	0.0743066	0	0	1	1	0	Histamine receptor antagonist	HRH1	-0.3567	0.6743	-1.3793
LJP009_PC3_24H:M19	BRD-K56277358	MGCD-265	PC3	trt_cp	10 uM	24 h	3	138	0.4658	0.256372	1	1	1	1	0	VEGFR inhibitor	MET|KDR|AXL	-0.3567	0.6743	-1.3793
CPC006_NCIH596_6H:BRD-K34581968-001-01-2:11.1	BRD-K34581968	BMS-536924	NCIH596	trt_cp	12 uM	6 h	2	175	0.35	0.250255	0	0	1	1	0	IGF-1 inhibitor	IGF1R|INSR|AKT1|CCNE1|CDK2|CYP3A4|ERBB2|KDR|LCK|MAPK1|MET|PDGFRA|PDGFRB	-0.3567	0.6743	-1.3792
CPC006_U937_6H:BRD-K67566344-001-01-8:10	BRD-K67566344	KU-0063794	U937	trt_cp	10 uM	6 h	2	261	0.41	0.330783	0	0	1	1	0	MTOR inhibitor	MTOR	-0.3567	0.6743	-1.379
REP.A001_HELA_24H:K13	BRD-A29289453	PCA-4248	HELA	trt_cp	10 uM	24 h	3	112	0.173	0.140755	1	1	1	1	0	Platelet activating factor receptor antagonist	PTAFR	-0.3566	0.6743	-1.3788
REP.B017_MCF10A_24H:D03	BRD-K44827188	vismodegib	MCF10A	trt_cp	0.25 uM	24 h	2	64	0.119	0.0882458	0	0	1	1	0	Hedgehog pathway inhibitor|Smoothened receptor antagonist	SMO|ABCB1|ABCG2|CYP2C19|CYP2C8|DHH|IHH|PTCH1	-0.3566	0.6743	-1.3787
CPC006_PC3_24H:P15	BRD-K32330832	VER-155008	PC3	trt_cp	12 uM	24 h	5	356	0.5801	0.459523	1	1	1	1	0	HSP inhibitor	HSPA1A	-0.3565	0.6743	-1.3786
REP.B028_MCF10A_24H:P03	BRD-K97399794	quercetin	MCF10A	trt_cp	0.25 uM	24 h	2	355	0.5897	0.462658	0	0	1	1	0	Polar auxin transport inhibitor	PIK3CG|AKR1B1|CYP2C8|EGFR|GAA|MAOA|PTPN1|SCN5A|SIRT1|XDH|ATP5A1|ATP5B|ATP5C1|HCK|HIBCH|PIM1|STK17B|UGT3A1	-0.3565	0.6743	-1.3784
CPC015_SKB_24H:BRD-A07440155-003-16-3:10	BRD-A07440155	labetalol	SKB	trt_cp	10 uM	24 h	2	50	0.08	0.0639529	0	0	1	1	0	Adrenergic receptor antagonist	ADRB1|ADRB2|ADRA1A|ADRA1D|ADRA1B	-0.3564	0.6743	-1.3782
LCP001_MCF10A.WT_24H:N04	BRD-K40738845	BMS-777607	MCF10A	trt_cp	10 uM	24 h	3	145	0.53	0.280319	1	1	1	1	0	AXL kinase inhibitor|FLT3 inhibitor|HGF receptor inhibitor|Macrophage inhibitor|MET inhibitor|Tyrosine kinase inhibitor	MET|AXL|MERTK|MST1R|TYRO3|FLT3	-0.3564	0.6743	-1.3782
EMU001_KMS34_24H:L01	BRD-K92428153	mycophenolate-mofetil	KMS34	trt_cp	10 uM	24 h	3	433	0.6856	0.550947	1	1	1	1	0	Inosine monophosphate dehydrogenase inhibitor|Dehydrogenase inhibitor|Hydroxycarboxylic acid receptor agonist|Immunosuppressant|Inositol monophosphatase inhibitor	IMPDH1|IMPDH2|HCAR2	-0.3564	0.6743	-1.3781
MOAR006_A375_24H:M01	BRD-K37312348	kenpaullone	A375	trt_cp	10 uM	24 h	3	379	0.57	0.469989	1	1	1	1	0	CDK inhibitor|GSK inhibitor	GSK3B|CDK1|CDK5|CDK2|LCK|CCNB1	-0.3564	0.6743	-1.3781
CPC016_NPC_24H:BRD-K37561857-001-06-4:10	BRD-K37561857	zardaverine	NPC	trt_cp	10 uM	24 h	4	470	0.63	0.550237	0	0	1	1	0	Phosphodiesterase inhibitor	PDE4D|PDE3A|PDE4A|PDE4B|PDE4C	-0.3563	0.6743	-1.3779
PCLB003_HCC515_24H:BRD-K53665955-001-01-4:3.33	BRD-K53665955	MK-5108	HCC515	trt_cp	3.33 uM	24 h	3	343	0.19	0.258139	1	0	1	1	0	Aurora kinase inhibitor	AURKA|AURKB|AURKC	-0.3563	0.6743	-1.3777
PAC003_U2OS_6H:BRD-K30240666-051-05-0:4.34818	BRD-K30240666	clemastine	U2OS	trt_cp	4 uM	6 h	2	53	0.28	0.123182	1	0	1	1	0	Histamine receptor antagonist	HRH1	-0.3563	0.6742	-1.3776
CPC006_PC3_24H:C23	BRD-K87142802	veliparib	PC3	trt_cp	10 uM	24 h	5	247	0.3614	0.302116	1	1	1	1	0	PARP inhibitor	PARP1|PARP2	-0.3562	0.6677	-1.3772
CPC013_ASC_24H:BRD-K63068307-001-01-4:10	BRD-K63068307	ZSTK-474	ASC	trt_cp	10 uM	24 h	4	467	0.58	0.526263	0	0	1	1	0	PI3K inhibitor	PIK3CG|PIK3CA|PIK3CB|PIK3CD	-0.3561	0.6675	-1.3769
LKCP002_U2OS_24H:O10	BRD-K55026842	azacitidine	U2OS	trt_cp	10 uM	24 h	5	454	0.5568	0.508403	0	0	1	1	0	DNA methyltransferase inhibitor	DNMT1|DNMT3A	-0.356	0.6674	-1.3766
CPC014_ASC_24H:BRD-K85402309-001-01-7:10	BRD-K85402309	dovitinib	ASC	trt_cp	10 uM	24 h	2	395	0.16	0.254208	0	0	1	1	0	EGFR inhibitor|FGFR inhibitor|FLT3 inhibitor|PDGFR inhibitor|VEGFR inhibitor	FGFR1|FLT1|KDR|EGFR|FGFR3|FLT3|FLT4|KIT|PDGFRB|CSF1R|FGFR2|INSR|PDGFRA	-0.356	0.6657	-1.3764
CPC018_A375_6H:BRD-K22385716-001-01-7:10	BRD-K22385716	LY-303511	A375	trt_cp	10 uM	6 h	5	185	0.4	0.275072	0	0	1	1	0	Casein kinase inhibitor|PI3K inhibitor	CSNK2A1|CSNK2A2|CSNK2B|MTOR|BRD2|BRD3|BRD4	-0.356	0.6661	-1.3764
CPC005_VCAP_6H:BRD-K55677650-003-01-1:10	BRD-K55677650	CO-101244	VCAP	trt_cp	10 uM	6 h	4	120	0.14	0.131065	0	0	1	1	0	Ionotropic glutamate receptor antagonist	GRIN2B	-0.3559	0.6657	-1.3761
CPC004_HEPG2_6H:BRD-K60274257-001-01-1:10	BRD-K60274257	dephostatin	HEPG2	trt_cp	10 uM	6 h	2	219	0.1	0.149642	0	0	1	1	0	Tyrosine phosphatase inhibitor	PTPN1|PTPN6	-0.3559	0.6657	-1.3761
REP.A017_A549_24H:A09	BRD-K50163129	acrivastine	A549	trt_cp	1.11 uM	24 h	3	306	0.4655	0.381638	0	0	1	1	0	Histamine receptor antagonist	HRH1	-0.3559	0.6657	-1.3761
MOAR003_A375_24H:F22	BRD-K40109029	SB-505124	A375	trt_cp	10 uM	24 h	3	489	0.79	0.62849	1	1	1	1	0	ALK inhibitor	TGFBR1|ACVR1B|ACVR1C	-0.3558	0.6656	-1.3759
CPC017_HEPG2_6H:BRD-K76674262-001-01-7:10	BRD-K76674262	BRD-K76674262	HEPG2	trt_cp	10 uM	6 h	3	512	0.74	0.622417	1	1	1	1	0	Protein synthesis inhibitor	RPL3	-0.3558	0.6656	-1.3759
CPC010_A549_6H:BRD-K50938786-003-07-6:10	BRD-K50938786	ropivacaine	A549	trt_cp	10 uM	6 h	2	80	0.07	0.0756701	1	0	1	1	0	Sodium channel inhibitor	SCN9A|SCN10A	-0.3558	0.6643	-1.3756
CPC015_PHH_24H:BRD-K09631521-001-05-7:10	BRD-K09631521	thiotepa	PHH	trt_cp	10 uM	24 h	2	133	0.34	0.215028	0	0	1	1	0	Cytochrome P450 inhibitor	CYP2B6|CYP3A4	-0.3557	0.6643	-1.3755
CPC005_HCC515_6H:BRD-K21548250-003-03-5:10	BRD-K21548250	moracizine	HCC515	trt_cp	10 uM	6 h	2	86	0.2	0.132616	1	1	1	1	0	Sodium channel inhibitor	SCN5A	-0.3557	0.6643	-1.3754
REP.A012_HA1E_24H:J01	BRD-K02079473	oxatomide	HA1E	trt_cp	10 uM	24 h	3	274	0.4437	0.352574	1	0	1	1	0	Histamine receptor antagonist	HRH1	-0.3557	0.6643	-1.3753
PCL001_HA1E_24H:BRD-K64835161:3.33	BRD-K64835161	ML-167	HA1E	trt_cp	3.33 uM	24 h	3	116	0.25	0.172199	1	0	1	1	0	CLK inhibitor|DYRK inhibitor	CLK4|DYRK1B|CLK1|DYRK1A	-0.3557	0.6643	-1.3753
NMH001_NEU_24H:BRD-K12762134-001-02-1:10	BRD-K12762134	XAV-939	NEU	trt_cp	10 uM	24 h	3	159	0.34	0.235109	0	0	1	1	0	Tankyrase inhibitor	TNKS|TNKS2	-0.3557	0.6643	-1.3752
REP.B023_HUVEC.A_24H:D13	BRD-A68464583	mazindol	HUVEC	trt_cp	2.22 uM	24 h	2	113	0.1603	0.136093	0	0	1	1	0	Dopamine receptor antagonist|Serotonin reuptake inhibitor	SLC6A3|SLC6A4|SLC6A2	-0.3556	0.6643	-1.3751
CPC010_VCAP_24H:BRD-K86595100-001-08-3:10	BRD-K86595100	chlordiazepoxide	VCAP	trt_cp	10 uM	24 h	5	158	0.09	0.120581	0	0	1	1	0	Benzodiazepine receptor agonist	GABRA1|GABRA2|GABRA3|GABRA4|GABRA5|GABRA6|GABRB1|GABRB2|GABRB3|GABRD|GABRE|GABRG1|GABRG2|GABRG3|GABRP|GABRQ	-0.3556	0.6643	-1.375
LKCP001_MCF7_48H:H03	BRD-A81513827	saxagliptin	MCF7	trt_cp	0.12 uM	48 h	4	59	0.2982	0.134125	1	1	1	1	0	Dipeptidyl peptidase inhibitor	DPP4|CYP3A5	-0.3556	0.6643	-1.375
REP.A011_MCF10A_24H:C01	BRD-A04352665	maraviroc	MCF10A	trt_cp	10 uM	24 h	3	88	0.2193	0.140472	1	1	1	1	0	CC chemokine receptor antagonist	CCR5|CYP3A5	-0.3556	0.6643	-1.375
CPC013_NEU_24H:BRD-K31553034-001-01-4:10	BRD-K31553034	zibotentan	NEU	trt_cp	10 uM	24 h	2	136	0.25	0.186453	0	0	1	1	0	Endothelin receptor antagonist	EDNRA	-0.3555	0.6643	-1.3748
CPC004_MCF7_6H:BRD-A15415227-003-01-1:10	BRD-A15415227	GW-1929	MCF7	trt_cp	10 uM	6 h	3	150	0.21	0.179468	1	0	1	1	0	PPAR receptor agonist|Insulin sensitizer	PPARG|INS	-0.3556	0.6643	-1.3748
CPC018_HEPG2_6H:BRD-K06014311-001-01-2:10	BRD-K06014311	DH-97	HEPG2	trt_cp	10 uM	6 h	3	253	0.26	0.259345	1	0	1	1	0	Melatonin receptor antagonist	MTNR1B	-0.3556	0.6643	-1.3748
REP.A028_HEK293_24H:H02	BRD-K93944989	safingol	HEK293	trt_cp	0.3 uM	24 h	2	98	0.2148	0.14671	0	0	1	1	0	PKC inhibitor	PRKCA|TRPM3	-0.3555	0.6643	-1.3746
CPC014_ASC_24H:BRD-K41170226-001-05-4:10	BRD-K41170226	BRD-K41170226	ASC	trt_cp	10 uM	24 h	3	125	0.19	0.155834	1	0	1	1	0	G protein-coupled receptor agonist|Biliverdin reductase A activator	GPBAR1|EFL1|FPR1	-0.3555	0.6643	-1.3745
LJP001_BT20_6H:BRD-K04923131-001-10-5:0.4	BRD-K04923131	BRD-K04923131	BT20	trt_cp	0.37 uM	6 h	4	163	0.35	0.241523	1	1	1	1	0	GSK inhibitor|Lipoxygenase inhibitor	GSK3B|ALOX5|GSK3A	-0.3555	0.6643	-1.3745
CPC006_A549_6H:BRD-K80527266-001-01-7:10	BRD-K80527266	triacsin-c	A549	trt_cp	10 uM	6 h	4	127	0.25	0.180178	1	0	1	1	0	Adrenergic receptor antagonist	ACSL1	-0.3554	0.6643	-1.3743
CPC013_SKB_24H:BRD-K92428232-001-01-5:10	BRD-K92428232	GSK-461364	SKB	trt_cp	10 uM	24 h	3	133	0.04	0.0737541	0	0	1	1	0	PLK inhibitor	PLK1	-0.3554	0.6643	-1.3742
CPC010_A375_6H:N05	BRD-K64835161	ML-167	A375	trt_cp	10 uM	6 h	3	106	0.2268	0.156785	1	1	1	1	0	CLK inhibitor|DYRK inhibitor	CLK4|DYRK1B|CLK1|DYRK1A	-0.3554	0.6643	-1.3741
CPC013_SKB_24H:BRD-K79254416-001-08-5:10	BRD-K79254416	decitabine	SKB	trt_cp	10 uM	24 h	4	59	0.12	0.0850839	0	0	1	1	0	DNA inhibitor	DNMT1|DNMT3A	-0.3553	0.6643	-1.3739
CPD001_PC3_24H:BRD-K36660044-001-18-4:10	BRD-K36660044	bufexamac	PC3	trt_cp	10 uM	24 h	3	224	0.25	0.23929	1	0	1	1	0	Cyclooxygenase inhibitor	HDAC10|HDAC6	-0.3553	0.6643	-1.3738
CPC001_PC3_6H:BRD-K11911061-003-02-8:10	BRD-K11911061	GR-127935	PC3	trt_cp	10 uM	6 h	4	249	0.35	0.298514	1	1	1	1	0	Serotonin receptor antagonist	HTR1B|HTR1D|HTR1A|HTR2A|HTR2C|HTR1E|HTR1F|HTR2B|HTR6	-0.3553	0.6643	-1.3738
CPC016_HEPG2_6H:BRD-K76775527-001-15-3:10	BRD-K76775527	nimesulide	HEPG2	trt_cp	10 uM	6 h	3	60	0.28	0.131065	1	0	1	1	0	Cyclooxygenase inhibitor	PTGS2|LTF|PLA2G2E|PTGS1	-0.3553	0.6643	-1.3737
PBIOA017_PC3_24H:K01	BRD-K73789395	ZM-336372	PC3	trt_cp	10 uM	24 h	3	159	0.34	0.235109	0	0	1	1	0	RAF inhibitor	BRAF|LCK|MAPK14|RAF1	-0.3552	0.6643	-1.3736
CPC020_HA1E_6H:BRD-K34098590-001-01-3:10	BRD-K34098590	tienilic-acid	HA1E	trt_cp	10 uM	6 h	3	356	0.33	0.346587	1	0	1	1	0	Sodium channel inhibitor	CYP2C9|SLC22A12|SLC12A1	-0.3552	0.6643	-1.3733
LJP007_NPC.TAK_24H:A07	BRD-K64857848	XMD-885	NPC	trt_cp	10 uM	24 h	3	576	0.7155	0.649152	1	1	1	1	0	MAP kinase inhibitor	MAPK7|LRRK2	-0.3551	0.6643	-1.3732
REP.B006_HELA_24H:A15	BRD-K18922609	neostigmine	HELA	trt_cp	0.25 uM	24 h	2	196	0.4015	0.283662	1	1	1	1	0	Acetylcholinesterase inhibitor	ACHE	-0.3551	0.6643	-1.373
CPC014_PHH_24H:BRD-K99964838-001-03-6:10	BRD-K99964838	bosutinib	PHH	trt_cp	10 uM	24 h	4	336	0.35	0.346764	0	0	1	1	0	Src inhibitor|Abl inhibitor|Bcr-Abl inhibitor	ABL1|SRC|BCR|LYN|CAMK2G|HCK|CAMK1D|CDK2|FRK|FYN|MAP2K1|MAP2K2|MAP3K2|MAP4K5|STK10|STK24|STK4|TNK2|TXK	-0.3551	0.6643	-1.373
REP.B020_THP1_24H:P08	BRD-K49404994	levetiracetam	THP1	trt_cp	0.74 uM	24 h	2	126	0.0499	0.08018	0	0	1	1	0	Calcium channel blocker	SV2A|CACNA1B|SCN1A	-0.3551	0.6643	-1.3729
CPC020_A375_6H:BRD-K35458079-001-19-0:10	BRD-K35458079	edaravone	A375	trt_cp	10 uM	6 h	5	185	0.15	0.168447	1	0	1	1	0	Nootropic agent	BCL2	-0.355	0.664	-1.3726
CPC017_SKB_24H:BRD-K60511616-236-01-4:10	BRD-K60511616	pravastatin	SKB	trt_cp	10 uM	24 h	2	128	0.28	0.191432	0	0	1	1	0	HMGCR inhibitor	HMGCR|SLCO1B1	-0.355	0.664	-1.3726
CPC017_SKB_24H:BRD-K71731651-001-01-9:10	BRD-K71731651	PNU-120596	SKB	trt_cp	10 uM	24 h	2	46	0.1	0.0685819	1	0	1	1	0	Acetylcholine receptor agonist	CHRNA7	-0.3549	0.6621	-1.3723
REP.B018_A375_24H:F02	BRD-K63150726	JTE-907	A375	trt_cp	0.74 uM	24 h	2	126	0.3157	0.201675	1	1	1	1	0	Cannabinoid receptor antagonist	CNR2	-0.3549	0.6621	-1.3722
CPC011_MCF7_24H:BRD-K33226500-065-07-2:10	BRD-K33226500	indinavir	MCF7	trt_cp	10 uM	24 h	2	147	0.4	0.245199	0	0	1	1	0	HIV inhibitor	CYP3A5|CYP3A4|CYP3A7	-0.3549	0.6621	-1.3721
CPC016_A375_6H:BRD-K87048468-003-01-9:10	BRD-K87048468	RS-102221	A375	trt_cp	10 uM	6 h	4	91	0.28	0.16141	1	0	1	1	0	Serotonin receptor antagonist	HTR2C|HTR2A|HTR2B	-0.3548	0.6621	-1.3719
REP.A001_MCF7_24H:N24	BRD-K29735307	ostarine	MCF7	trt_cp	0.04 uM	24 h	3	158	0.283	0.213822	0	0	1	1	0	Androgen receptor antagonist	AR	-0.3548	0.6621	-1.3718
CVD001_HUH7_6H:BRD-K36055864-001-09-3:10	BRD-K36055864	cycloheximide	HUH7	trt_cp	10 uM	6 h	3	407	0.61	0.50384	0	0	1	1	0	Protein synthesis inhibitor	GSK3B|RPL3	-0.3548	0.6621	-1.3717
CRCGN015_HEPG2_48H:BRD-K17849083:100	BRD-K17849083	tranilast	HEPG2	trt_cp	100 uM	48 h	3	139	0.52	0.271856	1	1	1	1	0	Angiogenesis inhibitor	IDO1|IFNG|IL10|IL2|IL4|SLC22A12|TGFB1|TNF|TRPV2|HPGDS|HRH1	-0.3548	0.6621	-1.3717
REP.A009_YAPC_24H:E19	BRD-K29950728	clomifene	YAPC	trt_cp	10 uM	24 h	3	191	0.3906	0.276193	0	0	1	1	0	Estrogen receptor antagonist	ESR1|AR	-0.3548	0.6621	-1.3717
CPC011_A375_6H:BRD-K55055802-001-06-0:10	BRD-K55055802	etomidate	A375	trt_cp	10 uM	6 h	3	520	0.23	0.3497	0	0	1	1	0	Membrane integrity inhibitor|GABA receptor modulator|Membrane permeability inhibitor	GABRA1|GABRA2|GABRA3|GABRA4|GABRA5|GABRA6|GABRB1|GABRB2|GABRB3|GABRD|GABRE|GABRG1|GABRG2|GABRG3|GABRP|GABRQ|ADRA2B	-0.3547	0.6621	-1.3716
CPC006_HCC515_6H:G01	BRD-K80527266	triacsin-c	HCC515	trt_cp	10 uM	6 h	3	254	0.1294	0.183322	1	0	1	1	0	Adrenergic receptor antagonist	ACSL1	-0.3547	0.6621	-1.3715
CPC016_A549_6H:BRD-K84266862-001-01-6:10	BRD-K84266862	BRL-50481	A549	trt_cp	10 uM	6 h	2	64	0.12	0.0886158	0	0	1	1	0	Phosphodiesterase inhibitor	PDE7A|PDE7B	-0.3547	0.6621	-1.3715
REP.B022_PC3_24H:A07	BRD-K74363950	aclidinium	PC3	trt_cp	2.22 uM	24 h	2	64	0.1999	0.114374	1	1	1	1	0	Acetylcholine receptor antagonist	CHRM3|CHRM1|CHRM2|CHRM4|CHRM5	-0.3546	0.6621	-1.3713
CPC006_H1299_6H:BRD-K32536677-001-01-0:10	BRD-K32536677	AGK-2	H1299	trt_cp	10 uM	6 h	2	49	0.48	0.155078	0	0	1	1	0	SIRT inhibitor	SIRT2	-0.3547	0.6621	-1.3713
REP.B024_A549_24H:C10	BRD-K74190368	resorcinol	A549	trt_cp	0.08 uM	24 h	2	104	0.1874	0.141167	1	1	1	1	0	Phosphodiesterase inhibitor	CA12|CA14|CA2|PTGS1	-0.3546	0.6621	-1.3712
LJP006_A375_24H:L15	BRD-A79768653	sirolimus	A375	trt_cp	1.11 uM	24 h	2	46	0.4236	0.141152	1	1	1	1	0	MTOR inhibitor	MTOR|FKBP1A|CCR5|FGF2	-0.3545	0.6621	-1.3709
REP.B017_HA1E_24H:G11	BRD-K63550407	erythromycin	HA1E	trt_cp	0.03 uM	24 h	2	112	0.2461	0.167879	1	1	1	1	0	NFKB inhibitor	MLNR	-0.3545	0.6621	-1.3706
EMU001_SKMEL5_24H:E01	BRD-A82772293	mepazine	SKMEL5	trt_cp	10 uM	24 h	2	59	0.0994	0.0774372	1	0	1	1	0	Mucus protecting agent	MALT1	-0.3544	0.6621	-1.3703
CPC011_MCF7_6H:BRD-K59753975-065-02-1:10	BRD-K59753975	vindesine	MCF7	trt_cp	10 uM	6 h	2	235	0.52	0.353481	1	1	1	1	0	Tubulin inhibitor	TUBB|TUBB1	-0.3544	0.6621	-1.3702
REP.A027_A375_24H:M01	BRD-K98572433	AZD-8931	A375	trt_cp	10 uM	24 h	3	309	0.4165	0.362758	0	0	1	1	0	EGFR inhibitor	ERBB2|EGFR|ERBB3	-0.3543	0.6621	-1.3701
AICHI002_OCILY3_24H:F01	BRD-K01436366	XMD-1150	OCILY3	trt_cp	10 uM	24 h	3	494	0.7331	0.608521	1	1	1	1	0	LRRK inhibitor	LRRK2	-0.3543	0.6621	-1.37
LJP007_HEPG2_24H:E24	BRD-K13662825	dinaciclib	HEPG2	trt_cp	0.04 uM	24 h	2	438	0.7209	0.568205	0	0	1	1	0	CDK inhibitor	CDK1|CDK2|CDK9|CDK5|CCNT1	-0.3543	0.6621	-1.3699
CPC011_A375_6H:BRD-K59753975-065-02-1:10	BRD-K59753975	vindesine	A375	trt_cp	10 uM	6 h	3	123	0.56	0.265385	1	1	1	1	0	Tubulin inhibitor	TUBB|TUBB1	-0.3543	0.6621	-1.3699
ASG003_U2OS_24H:L02	BRD-K56301217	ABT-737	U2OS	trt_cp	1.11 uM	24 h	5	293	0.4865	0.381774	1	1	1	1	0	BCL inhibitor	BCL2|BCL2L1|BCL2L2	-0.3542	0.6621	-1.3697
REP.A006_HELA_24H:B07	BRD-A18917088	estradiol	HELA	trt_cp	10 uM	24 h	3	533	0.7583	0.642857	1	1	1	1	0	Estrogen receptor agonist	ESR1|ESR2|NR1I2|CYP2B6|CYP2C19|CYP2C8|CYP2E1|CYP3A5|CYP3A7|GPER1|KCNMA1	-0.3542	0.6621	-1.3696
CPC016_SKB_24H:BRD-A30655177-001-06-6:10	BRD-A30655177	LFM-A13	SKB	trt_cp	10 uM	24 h	2	517	0.38	0.448196	0	0	1	1	0	BTK inhibitor	BTK	-0.3542	0.6621	-1.3695
ASG003_U2OS_6H:H22	BRD-K11853856	PJ-34	U2OS	trt_cp	10 uM	6 h	5	406	0.5493	0.477528	0	0	1	1	0	PARP inhibitor	EEF2|PARP1|PARP15|PARP3	-0.3542	0.6621	-1.3694
CPC006_U937_6H:BRD-A45889380-300-04-8:10	BRD-A45889380	mepacrine	U937	trt_cp	10 uM	6 h	2	293	0.28	0.28963	0	0	1	1	0	NFKB inhibitor|Cytokine production inhibitor|p53 activator	TP53|AKT1|MTOR|NFKB1|PLA2G2A|PLA2G2D|PLA2G1B|PLA2G4A|PLA2G6|PLCL1	-0.3541	0.6621	-1.3691
REP.B022_MCF10A_24H:H11	BRD-A70858459	estramustine	MCF10A	trt_cp	0.03 uM	24 h	2	154	0.2522	0.19928	0	0	1	1	0	DNA inhibitor	ESR1|ESR2|MAP1A|MAP2	-0.354	0.6621	-1.369
PBIOA022_HA1E_24H:P19	BRD-K70401845	erlotinib	HA1E	trt_cp	10 uM	24 h	3	228	0.37	0.293697	1	1	1	1	0	EGFR inhibitor	EGFR|NR1I2	-0.354	0.6621	-1.369
REP.A014_HEK293_24H:B23	BRD-K56558538	ambroxol	HEK293	trt_cp	0.125 uM	24 h	3	106	0.1018	0.105041	0	0	1	1	0	Sodium channel inhibitor	GBA|CYP3A4	-0.3541	0.6621	-1.369
REP.A017_PC3_24H:B19	BRD-A50998626	palomid-529	PC3	trt_cp	10 uM	24 h	3	192	0.2289	0.211984	1	1	1	1	0	AKT inhibitor|FGFR inhibitor|MTOR inhibitor|VEGFR inhibitor	MTOR|FGF2	-0.354	0.6621	-1.3689
REP.A017_PC3_24H:A16	BRD-A50764878	MDL-73005EF	PC3	trt_cp	0.37 uM	24 h	3	130	0.0657	0.0934512	1	0	1	1	0	Serotonin receptor antagonist	HTR1A	-0.354	0.6621	-1.3687
CPC005_A549_24H:BRD-K78599730-001-03-4:10	BRD-K78599730	manumycin-a	A549	trt_cp	10 uM	24 h	3	168	0.38	0.255492	1	1	1	1	0	Farnesyltransferase inhibitor|NFKB inhibitor	FNTA|IKBKB	-0.354	0.6621	-1.3687
REP.B018_MCF7_24H:G24	BRD-K64338723	milacemide	MCF7	trt_cp	0.01 uM	24 h	2	143	0.301	0.209789	1	1	1	1	0	Monoamine oxidase inhibitor	MAOB	-0.354	0.6621	-1.3687
CPC012_NPC_24H:BRD-K48935217-001-01-3:10	BRD-K48935217	epothilone	NPC	trt_cp	10 uM	24 h	3	198	0.42	0.2916	0	0	1	1	0	Tubulin inhibitor	TUBB	-0.3539	0.6615	-1.3686
REP.A010_A375_24H:G07	BRD-K13183738	pentamidine	A375	trt_cp	10 uM	24 h	3	191	0.4949	0.310889	0	0	1	1	0	Anti-pneumocystis agent	TRDMT1	-0.354	0.6616	-1.3686
CPC006_HEPG2_6H:BRD-A02006392-001-09-9:10	BRD-A02006392	nitrendipine	HEPG2	trt_cp	10 uM	6 h	3	55	0.12	0.082149	1	1	1	1	0	Calcium channel blocker	CACNA1C|CACNA1D|CACNA2D1|CACNA1H|CACNA1S|CACNA2D2|CACNB2|CACNG1|KCNN4	-0.3539	0.6608	-1.3684
CPC005_A375_6H:BRD-K27710560-001-03-4:10	BRD-K27710560	splitomycin	A375	trt_cp	10 uM	6 h	3	212	0.41	0.29812	1	1	1	1	0	SIRT inhibitor	SIRT2|SIRT1	-0.3539	0.6608	-1.3684
CPC013_MCF7_6H:BRD-K64881305-001-01-1:10	BRD-K64881305	ispinesib	MCF7	trt_cp	10 uM	6 h	4	332	0.45	0.390846	1	1	1	1	0	Kinesin inhibitor	KIF11	-0.3539	0.6607	-1.3683
REP.B012_MCF10A_24H:A22	BRD-K00259736	colchicine	MCF10A	trt_cp	0.08 uM	24 h	2	419	0.7021	0.54845	1	1	1	1	0	Tubulin inhibitor	TUBB|TUBB1|GLRA1|GLRA2|TUBA1A|TUBA1B|TUBA1C|TUBA3C|TUBA3D|TUBA3E|TUBA4A|TUBB2A|TUBB2B|TUBB3|TUBB4A|TUBB4B|TUBB6|TUBB8	-0.3538	0.6594	-1.3681
CPC017_HT29_6H:BRD-K67860401-001-01-5:10	BRD-K67860401	AR-A014418	HT29	trt_cp	10 uM	6 h	5	199	0.24	0.220985	0	0	1	1	0	GSK inhibitor	GSK3B	-0.3538	0.6594	-1.3678
REP.B028_MCF7_24H:D24	BRD-A93093700	temazepam	MCF7	trt_cp	0.01 uM	24 h	2	60	0.1164	0.0845051	1	0	1	1	0	GABA receptor agonist	GABRA1|GABRA2|GABRA3|GABRA5|GABRA4|GABRA6|GABRB1|GABRB2|GABRB3|GABRD|GABRE|GABRG1|GABRG2|GABRG3|GABRP|GABRQ|GABRR1|GABRR2|GABRR3|TSPO	-0.3537	0.6594	-1.3677
LPROT001_MCF7_6H:BRD-K87124298:2	BRD-K87124298	OSI-027	MCF7	trt_cp	2.22 uM	6 h	3	155	0.33	0.228693	1	1	1	1	0	MTOR inhibitor	MTOR	-0.3537	0.6594	-1.3675
CPC009_HEPG2_6H:BRD-K87024524-001-03-2:10	BRD-K87024524	phenelzine	HEPG2	trt_cp	10 uM	6 h	3	187	0.3	0.239504	1	0	1	1	0	Monoamine oxidase inhibitor	MAOB|AOC3|MAOA|ABAT|GAD2|GPT|GPT2|SLC6A2|SLC6A3|SLC6A4	-0.3537	0.6594	-1.3675
REP.B022_YAPC_24H:I15	BRD-K72222507	quinapril	YAPC	trt_cp	0.25 uM	24 h	2	126	0.0451	0.0762262	0	0	1	1	0	ACE inhibitor	ACE	-0.3537	0.6594	-1.3675
LJP007_CD34_24H:O16	BRD-K53417444	OTS-167	CD34	trt_cp	0.37 uM	24 h	3	780	0.808	0.802756	0	0	1	1	0	Maternal embryonic leucine zipper kinase inhibitor	MELK	-0.3537	0.6594	-1.3675
REP.A009_THP1_24H:P13	BRD-K34888156	theobromine	THP1	trt_cp	10 uM	24 h	2	61	0.1784	0.105486	1	1	1	1	0	Phosphodiesterase inhibitor	ADORA1|ADORA2A|PDE4B	-0.3536	0.6594	-1.3674
CPC017_ASC_24H:BRD-K52930707-001-04-8:10	BRD-K52930707	rescinnamine	ASC	trt_cp	10 uM	24 h	4	202	0.18	0.192816	0	0	1	1	0	ACE inhibitor	ACE	-0.3536	0.6594	-1.3674
REP.A013_A375_24H:O10	BRD-K43887077	dopamine	A375	trt_cp	0.37 uM	24 h	3	101	0.334	0.185722	0	0	1	1	0	Dopamine receptor agonist	DRD2|DRD1|DRD3|DRD4|DRD5|DBH|HTR1A|HTR7|SLC6A2|SLC6A3|SLC6A4	-0.3536	0.6594	-1.3674
CPC002_HA1E_24H:BRD-K51918615-303-01-1:10	BRD-K51918615	iodophenpropit	HA1E	trt_cp	10 uM	24 h	3	113	0.28	0.179866	1	0	1	1	0	Histamine receptor antagonist	HRH3|HRH4|GRIN2B	-0.3536	0.6594	-1.3673
CPC006_A375_24H:BRD-K52075040-001-03-0:44.4	BRD-K52075040	cerulenin	A375	trt_cp	40 uM	24 h	4	551	0.73	0.64131	0	0	1	1	0	Fatty acid synthase inhibitor	FASN	-0.3536	0.6594	-1.3673
AICHI002_KMS34_24H:H01	BRD-K06749501	GSK-1838705A	KMS34	trt_cp	10 uM	24 h	3	99	0.41	0.203723	1	1	1	1	0	IGF-1 inhibitor	IGF1R|ALK|INSR|RPS6KA1	-0.3536	0.6594	-1.3673
REP.A005_PC3_24H:H01	BRD-K09255212	clioquinol	PC3	trt_cp	10 uM	24 h	2	110	0.2234	0.158514	1	1	1	1	0	Chelating agent	OPRK1	-0.3536	0.6594	-1.3672
CPC006_NCIH2073_6H:BRD-K60623809-001-02-0:10	BRD-K60623809	SU-11652	NCIH2073	trt_cp	10 uM	6 h	2	414	0.66	0.52857	0	0	1	1	0	Tyrosine kinase inhibitor	KDR|PDGFRB	-0.3535	0.6594	-1.367
CPC015_PHH_24H:BRD-K79366068-236-01-5:10	BRD-K79366068	PSB-069	PHH	trt_cp	10 uM	24 h	2	291	0.02	0.0771422	0	0	1	1	0	NTPDase inhibitor	ENTPD1|ENTPD2|ENTPD3	-0.3535	0.6594	-1.3669
CPC016_HT29_6H:BRD-K79116891-003-03-7:10	BRD-K79116891	proxymetacaine	HT29	trt_cp	10 uM	6 h	5	175	0.12	0.146535	1	0	1	1	0	Sodium channel inhibitor	SCN9A|SCN10A|SCN5A	-0.3534	0.6593	-1.3665
REP.A015_YAPC_24H:K16	BRD-K59332007	linopirdine	YAPC	trt_cp	0.37 uM	24 h	3	100	0.2367	0.155571	1	0	1	1	0	Potassium channel antagonist	KCNQ2|KCNQ3|KCNQ4|KCNQ5	-0.3534	0.6593	-1.3665
CPC014_VCAP_6H:BRD-U33728988-000-01-6:10	BRD-U33728988	QL-X-138	VCAP	trt_cp	10 uM	6 h	5	281	0.46	0.363549	0	0	1	1	0	MTOR inhibitor	BTK|JAK3|MKNK2|MTOR|PRKDC	-0.3534	0.6592	-1.3664
CPC013_A375_6H:BRD-U68942961-000-01-2:10	BRD-U68942961	JW-7-24-1	A375	trt_cp	10 uM	6 h	3	496	0.63	0.565251	1	1	1	1	0	LCK Inhibitor	LCK	-0.3534	0.6592	-1.3664
REP.B018_MCF7_24H:D21	BRD-K62762455	RU-58841	MCF7	trt_cp	0.25 uM	24 h	2	116	0.4279	0.225284	1	1	1	1	0	Androgen receptor antagonist	AR	-0.3533	0.6591	-1.3663
REP.A006_HELA_24H:M01	BRD-K22861715	chrysin	HELA	trt_cp	10 uM	24 h	3	439	0.6739	0.549997	1	1	1	1	0	Breast cancer resistance protein inhibitor	ABCG2|AKR1B1|CDK6|CYP19A1|CYP1B1	-0.3534	0.6591	-1.3663
PAC002_U2OS_6H:BRD-K56596464-004-02-4:14.5218	BRD-K56596464	QX-314	U2OS	trt_cp	15 uM	6 h	2	178	0.43	0.279753	0	0	1	1	0	Sodium channel inhibitor	MAPK14|TGFBR1	-0.3533	0.659	-1.3661
CPC017_HT29_6H:BRD-K87932577-001-01-6:10	BRD-K87932577	NSC-693868	HT29	trt_cp	10 uM	6 h	5	158	0.18	0.170528	0	0	1	1	0	CDK inhibitor|GSK inhibitor	CDK1|CDK5|GSK3B|GSK3A	-0.3532	0.6585	-1.3659
REP.A027_PC3_24H:M01	BRD-K98572433	AZD-8931	PC3	trt_cp	10 uM	24 h	3	236	0.3726	0.299853	0	0	1	1	0	EGFR inhibitor	ERBB2|EGFR|ERBB3	-0.3532	0.6586	-1.3659
CPC017_A375_6H:BRD-K10176267-001-02-5:10	BRD-K10176267	L-701252	A375	trt_cp	10 uM	6 h	3	131	0.05	0.0818373	0	0	1	1	0	Glutamate receptor antagonist	GRIN1	-0.3533	0.6589	-1.3659
CPC014_HEPG2_6H:BRD-K38615104-001-06-8:10	BRD-K38615104	A-443654	HEPG2	trt_cp	10 uM	6 h	3	497	0.6	0.552185	1	1	1	1	0	AKT inhibitor	AKT1|AKT2	-0.3532	0.6569	-1.3658
CPC018_SKB_24H:BRD-A79768653-001-03-9:10	BRD-A79768653	sirolimus	SKB	trt_cp	10 uM	24 h	3	321	0.51	0.409136	0	0	1	1	0	MTOR inhibitor	MTOR|FKBP1A|CCR5|FGF2	-0.3532	0.6563	-1.3657
LJP009_CD34_24H:J07	BRD-K79239947	PF-573228	CD34	trt_cp	10 uM	24 h	3	255	0.4796	0.353623	1	1	1	1	0	Focal adhesion kinase inhibitor	CDK1|CDK2|CDK7|GSK3B|IKBKB	-0.3532	0.6563	-1.3657
CPC013_ASC_24H:BRD-K47832606-001-13-7:10	BRD-K47832606	floxuridine	ASC	trt_cp	10 uM	24 h	4	354	0.4	0.380507	0	0	1	1	0	DNA synthesis inhibitor	TYMS	-0.3532	0.6563	-1.3656
CPC017_HEPG2_6H:BRD-K98769987-001-09-6:10	BRD-K98769987	flumazenil	HEPG2	trt_cp	10 uM	6 h	3	73	0.25	0.136604	1	0	1	1	0	Benzodiazepine receptor antagonist	GABRA1|GABRA2|GABRA3|GABRA5|GABRA4|GABRA6|GABRB1|GABRB2|GABRB3|GABRD|GABRE|GABRG1|GABRG2|GABRG3|GABRP|GABRQ	-0.3531	0.6563	-1.3654
REP.B020_HA1E_24H:J01	BRD-K84748119	vicriviroc	HA1E	trt_cp	2.22 uM	24 h	2	239	0.5148	0.35469	1	1	1	1	0	CC chemokine receptor antagonist	CCR5	-0.3531	0.6563	-1.3654
REP.A003_A549_24H:M23	BRD-K35719256	rotundine	A549	trt_cp	0.125 uM	24 h	3	176	0.255	0.214219	0	0	1	1	0	Serotonin receptor agonist	DRD1|DRD2|HTR1A|HTR1D|HTR4|HTR7|DRD3	-0.3531	0.6563	-1.3654
REP.A024_JURKAT_24H:P01	BRD-K79404599	enzastaurin	JURKAT	trt_cp	10 uM	24 h	3	322	0.3724	0.350157	1	1	1	1	0	PKC inhibitor	PRKCB|AKT1|GSK3B|PRKCA|PRKCD|PRKCG	-0.3531	0.6563	-1.3653
PAC002_U2OS_6H:BRD-K43457670-001-04-7:10	BRD-K43457670	acetazolamide	U2OS	trt_cp	10 uM	6 h	2	20	0.1	0.0452216	0	0	1	1	0	Carbonic anhydrase inhibitor	CA14|CA2|CA1|CA4|CA12|CA7|CA13|CA6|AQP1|CA3	-0.3531	0.6563	-1.3653
REP.A010_A549_24H:C18	BRD-K12737986	veliparib	A549	trt_cp	0.04 uM	24 h	3	40	0.1544	0.0794665	1	0	1	1	0	PARP inhibitor	PARP1|PARP2	-0.3531	0.6563	-1.3652
REP.A028_HEK293_24H:A08	BRD-K92428153	mycophenolate-mofetil	HEK293	trt_cp	3.33 uM	24 h	2	289	0.4878	0.379665	0	0	1	1	0	Inosine monophosphate dehydrogenase inhibitor|Dehydrogenase inhibitor|Hydroxycarboxylic acid receptor agonist|Immunosuppressant|Inositol monophosphatase inhibitor	IMPDH1|IMPDH2|HCAR2	-0.353	0.6563	-1.3651
CPC015_SKB_24H:BRD-A50737080-001-01-4:10	BRD-A50737080	CGK-733	SKB	trt_cp	10 uM	24 h	2	330	0.6	0.449949	0	0	1	1	0	ATM kinase inhibitor|ATR kinase inhibitor	ATM|ATR	-0.353	0.6563	-1.3651
CPC006_NOMO1_6H:BRD-K08478539-001-02-1:10	BRD-K08478539	SMER-28	NOMO1	trt_cp	10 uM	6 h	2	65	0.12	0.0893054	1	0	1	1	0	Autophagy inducer	SNCA	-0.3531	0.6563	-1.3651
REP.B023_HUVEC.A_24H:K04	BRD-K70924353	amtolmetin-guacil	HUVEC	trt_cp	0.08 uM	24 h	2	398	0.0515	0.144769	0	0	1	1	0	Cyclooxygenase inhibitor	PTGS1|PTGS2	-0.353	0.6542	-1.3647
CPC015_ASC_24H:BRD-K85119730-001-17-2:10	BRD-K85119730	tolbutamide	ASC	trt_cp	10 uM	24 h	4	153	0.25	0.197764	0	0	1	1	0	ATP channel blocker	ABCC8|KCNJ11|CYP2B6|CYP2C19|CYP2C8|KCNJ1|KCNJ8	-0.3529	0.6534	-1.3646
CPC006_AGS_6H:BRD-K55966568-001-01-3:6	BRD-K55966568	orantinib	AGS	trt_cp	6.66 uM	6 h	2	75	0.13	0.0998465	1	1	1	1	0	PDGFR inhibitor|FGFR inhibitor|VEGFR inhibitor	KDR|PDGFRB|FGFR1|AURKA|AURKB|PDGFRA|TBK1|EGFR|FGFR2	-0.3529	0.6528	-1.3645
CPC016_SKB_24H:BRD-K22010301-001-01-2:10	BRD-K22010301	JLK-6	SKB	trt_cp	10 uM	24 h	3	280	0.37	0.32547	1	0	1	1	0	Gamma secretase inhibitor|Beta amyloid inhibitor	PSEN1	-0.3529	0.6532	-1.3645
REP.A005_YAPC_24H:J24	BRD-A10012892	argatroban	YAPC	trt_cp	0.04 uM	24 h	3	207	0.4264	0.300417	0	0	1	1	0	Thrombin inhibitor	F2|CYP3A5	-0.3529	0.6532	-1.3645
MOAR006_A375_24H:C01	BRD-K86727142	embelin	A375	trt_cp	10 uM	24 h	3	457	0.54	0.502326	1	1	1	1	0	HCV inhibitor|XIAP inhibitor	XIAP	-0.3529	0.6526	-1.3644
REP.A028_PC3_24H:I01	BRD-K94830329	ataluren	PC3	trt_cp	10 uM	24 h	2	146	0.2943	0.209605	0	0	1	1	0	CFTR channel agonist|Dystrophin stimulant	DMD|CFTR|F8|F9	-0.3528	0.6525	-1.3643
NMH002_NEU_24H:BRD-K76723084-001-19-0:10	BRD-K76723084	isotretinoin	NEU	trt_cp	10 uM	24 h	3	67	0.25	0.130869	0	0	1	1	0	Retinoid receptor agonist	CYP2B6|CYP2C19|CYP2C8|CYP3A5|CYP3A7|RARA|RARB|RARG	-0.3528	0.6515	-1.3641
CPC013_HCC515_6H:BRD-K71512533-001-01-7:10	BRD-K71512533	SNS-314	HCC515	trt_cp	10 uM	6 h	3	72	0.21	0.124339	1	0	1	1	0	Aurora kinase inhibitor	AURKA|AURKB|AURKC	-0.3528	0.6519	-1.3641
LJP002_SKBR3_6H:BRD-K95435023-001-03-6:10	BRD-K95435023	PHA-665752	SKBR3	trt_cp	10 uM	6 h	3	331	0.22	0.27287	0	0	1	1	0	MET inhibitor	MET	-0.3527	0.6511	-1.3638
REP.B005_A375_24H:A19	BRD-K08109215	I-BET-762	A375	trt_cp	2.22 uM	24 h	3	426	0.6656	0.538446	1	1	1	1	0	Bromodomain inhibitor	BRD2|BRD3|BRD4|APOA1	-0.3527	0.6511	-1.3637
REP.B021_A375_24H:F01	BRD-K82225283	BRD-K82225283	A375	trt_cp	2.22 uM	24 h	2	103	0.3515	0.192403	1	1	1	1	0	Nitric oxide stimulant|Guanylate cyclase stimulant	GUCY1A2|GUCY1A3|GUCY1B3|GUCY1B2	-0.3527	0.6511	-1.3637
CPC013_ASC_24H:BRD-K07881437-001-01-2:10	BRD-K07881437	danusertib	ASC	trt_cp	10 uM	24 h	4	235	0.4	0.310023	0	0	1	1	0	Aurora kinase inhibitor|FGFR inhibitor	AURKA|AURKB|AURKC|FGFR1|NTRK1|RET|BCR|SLK	-0.3527	0.6511	-1.3636
CPC006_A375_6H:H16	BRD-K73789395	ZM-336372	A375	trt_cp	100 uM	6 h	5	319	0.5432	0.420926	1	1	1	1	0	RAF inhibitor	BRAF|LCK|MAPK14|RAF1	-0.3526	0.6511	-1.3634
CPC015_ASC_24H:BRD-K82036761-003-07-0:10	BRD-K82036761	sertraline	ASC	trt_cp	10 uM	24 h	4	294	0.38	0.337984	0	0	1	1	0	Serotonin receptor antagonist	SLC6A4|CYP2C19|SLC6A3	-0.3526	0.6511	-1.3633
REP.A026_A375_24H:A20	BRD-K87782578	AVL-292	A375	trt_cp	3.33 uM	24 h	3	343	0.4282	0.387526	0	0	1	1	0	BTK inhibitor	BTK|EGFR|ITK|JAK3|YES1	-0.3526	0.6511	-1.3633
REP.B011_PC3_24H:C02	BRD-A04352665	maraviroc	PC3	trt_cp	0.74 uM	24 h	2	67	0.4043	0.166425	0	0	1	1	0	CC chemokine receptor antagonist	CCR5|CYP3A5	-0.3525	0.6511	-1.3632
REP.B012_MCF7_24H:D11	BRD-K00603606	ticlopidine	MCF7	trt_cp	0.03 uM	24 h	2	96	0.3624	0.188608	0	0	1	1	0	Purinergic receptor antagonist	P2RY12|CYP2B6|CYP2C19	-0.3525	0.6511	-1.3631
CPC009_HEPG2_6H:BRD-A19736161-001-03-4:10	BRD-A19736161	ondansetron	HEPG2	trt_cp	10 uM	6 h	3	338	0.25	0.29394	1	0	1	1	0	Serotonin receptor antagonist	HTR3A|CYP2D6|CYP3A5|HTR1A|HTR1B|HTR3B|HTR4|OPRM1	-0.3525	0.651	-1.3628
LPROT003_NPC_6H:BRD-K54997624:0.25	BRD-K54997624	alpelisib	NPC	trt_cp	0.25 uM	6 h	3	121	0.39	0.219662	1	1	1	1	0	PI3K inhibitor	PIK3CA|PIK3CB|PIK3CD|PIK3CG	-0.3524	0.6509	-1.3627
REP.A003_YAPC_24H:C01	BRD-A31521121	methocarbamol	YAPC	trt_cp	10 uM	24 h	3	229	0.3315	0.278606	0	0	1	1	0	Muscle relaxant	CA1	-0.3524	0.6509	-1.3627
CPC016_NPC_24H:BRD-K63533170-001-01-1:10	BRD-K63533170	AM-630	NPC	trt_cp	10 uM	24 h	4	180	0.12	0.148613	0	0	1	1	0	Cannabinoid receptor antagonist	CNR2|CNR1	-0.3524	0.6507	-1.3626
CPC002_HCC515_24H:BRD-K37289225-001-19-0:10	BRD-K37289225	clozapine	HCC515	trt_cp	10 uM	24 h	3	68	0.25	0.131842	1	1	1	1	0	Serotonin receptor antagonist|Dopamine receptor antagonist	DRD4|DRD2|DRD3|HTR2A|ADRA1A|ADRA1B|CHRM1|DRD1|HRH1|HRH4|HTR1A|HTR1B|HTR1D|HTR1E|HTR2C|HTR6|HTR7|CYP2C19|ADRA1D|ADRA2A|ADRA2B|ADRA2C|CALY|CHRM2|CHRM3|CHRM4|CHRM5|DRD5|HTR1F|HTR2B|HTR3A|HTR5A	-0.3524	0.6507	-1.3626
REP.A012_MDAMB231_24H:M19	BRD-K03194791	roflumilast	MDAMB231	trt_cp	10 uM	24 h	2	175	0.239	0.206799	0	0	1	1	0	Phosphodiesterase inhibitor	PDE4A|PDE4B|PDE4C|PDE4D|CYP2B6|CYP2C19	-0.3523	0.65	-1.3624
TAA001_SHSY5Y_24H:D13	BRD-K03406345	azacitidine	SHSY5Y	trt_cp	10 uM	24 h	3	495	0.74	0.611997	0	0	1	1	0	DNA inhibitor	DNMT1|DNMT3A	-0.3523	0.6487	-1.3622
PBIOA018_A375_24H:I01	BRD-K37720887	SB-525334	A375	trt_cp	10 uM	24 h	3	215	0.36	0.28132	1	1	1	1	0	TGF-beta receptor inhibitor	TGFBR1	-0.3522	0.6475	-1.362
CPC018_HEPG2_6H:BRD-K50398167-236-12-8:10	BRD-K50398167	meclofenamic-acid	HEPG2	trt_cp	10 uM	6 h	3	87	0.08	0.0843597	1	0	1	1	0	Cyclooxygenase inhibitor|Prostanoid receptor antagonist	PTGS1|PTGS2|ALOX5|CNR1|KCNQ2|KCNQ3	-0.3523	0.6476	-1.362
REP.B015_HT29_24H:A18	BRD-K55781385	BMS-927711	HT29	trt_cp	0.01 uM	24 h	2	109	0.3719	0.20359	1	0	1	1	0	Calcitonin antagonist	CALCA|CALCRL	-0.3522	0.6472	-1.3619
CPC015_A549_24H:BRD-K84658672-001-03-0:10	BRD-K84658672	nateglinide	A549	trt_cp	10 uM	24 h	3	58	0.2	0.108908	1	0	1	1	0	Insulin secretagogue	ABCC8|KCNJ11|CYP3A4|INS|KCNJ10|PPARG	-0.3522	0.6472	-1.3618
CPC014_ASC_24H:BRD-K79437791-001-03-2:10	BRD-K79437791	BRD-K79437791	ASC	trt_cp	10 uM	24 h	3	161	0.07	0.107348	1	0	1	1	0	Inhibitor of methylation of endogenous isoprenylated proteins	PPARG	-0.3522	0.6472	-1.3617
LJP006_HME1_3H:K05	BRD-K13390322	AT-7519	HME1	trt_cp	0.12 uM	3 h	3	219	0.54	0.347736	1	1	1	1	0	CDK inhibitor|Cell cycle inhibitor	CDK2|CDK1|CDK9|CDK4|CDK5|CDK6	-0.3522	0.6472	-1.3617
CPC014_ASC_24H:BRD-K43880410-001-07-8:10	BRD-K43880410	pregnenolone	ASC	trt_cp	10 uM	24 h	3	297	0.3	0.301835	1	0	1	1	0	Glutamate receptor antagonist	PGR|CYP17A1|SULT2B1	-0.3521	0.6472	-1.3615
CPC016_SKB_24H:BRD-A80017228-001-15-8:10	BRD-A80017228	bendroflumethiazide	SKB	trt_cp	10 uM	24 h	3	162	0.2	0.182013	1	0	1	1	0	Sodium channel inhibitor	SLC12A3|CA1|CA2|CA4|KCNMA1|SLC12A1	-0.352	0.6472	-1.3612
CPC015_HT29_6H:BRD-A68930007-001-03-1:10	BRD-A68930007	ouabain	HT29	trt_cp	10 uM	6 h	3	404	0.66	0.522148	1	1	1	1	0	Na/K-ATPase inhibitor	ATP1A1|ATP1A2|ATP1A3|ATP1A4|ATP1B1|ATP1B2|ATP1B3|ATP1B4|FXYD2	-0.352	0.6472	-1.3612
CPC017_PHH_24H:BRD-K12120659-305-01-4:10	BRD-K12120659	GR-144053	PHH	trt_cp	10 uM	24 h	3	245	0.27	0.260073	0	0	1	1	0	Integrin inhibitor	ITGB3|ITGA2B	-0.352	0.6472	-1.3611
CPC002_HA1E_24H:BRD-K50135270-300-01-5:10	BRD-K50135270	GBR-12935	HA1E	trt_cp	10 uM	24 h	3	98	0.21	0.145062	1	1	1	1	0	Dopamine receptor antagonist	AGTR1|SLC6A3	-0.352	0.6472	-1.3611
LJP008_NPC.TAK_24H:E01	BRD-K56301217	ABT-737	NPC	trt_cp	10 uM	24 h	3	201	0.355	0.270111	1	1	1	1	0	BCL inhibitor	BCL2|BCL2L1|BCL2L2	-0.352	0.6472	-1.3609
CPC014_NEU_24H:BRD-K81528515-001-03-9:10	BRD-K81528515	nilotinib	NEU	trt_cp	10 uM	24 h	2	346	0.04	0.118959	0	0	1	1	0	Bcr-Abl inhibitor|Abl inhibitor	ABL1|KIT|BCR|CYP2B6|CYP2C8|DDR1|DDR2|PDGFRA	-0.352	0.6472	-1.3609
REP.A023_HELA_24H:A20	BRD-K68065987	MK-2206	HELA	trt_cp	3.33 uM	24 h	3	196	0.4672	0.305992	1	1	1	1	0	AKT inhibitor	AKT1|AKT2|AKT3	-0.352	0.6472	-1.3609
LPROT005_A549_6H:BRD-K01567962:25	BRD-K01567962	pyrazolanthrone	A549	trt_cp	25 uM	6 h	3	171	0.38	0.257763	0	0	1	1	0	JNK inhibitor	MAPK10|MAPK8|MAPK9|TTK|LRRK2|MAPK8IP1	-0.352	0.6472	-1.3609
CPC004_HCC515_6H:BRD-K93461745-003-14-4:10	BRD-K93461745	buspirone	HCC515	trt_cp	10 uM	6 h	3	43	0.18	0.0889613	1	0	1	1	0	Serotonin receptor agonist	HTR1A|DRD2	-0.3519	0.6472	-1.3608
CPC016_HT29_6H:BRD-K93258693-001-05-8:10	BRD-K93258693	GW-9662	HT29	trt_cp	10 uM	6 h	5	143	0.18	0.162231	1	0	1	1	0	PPAR receptor antagonist	PPARG|NCOA2|RXRA	-0.3519	0.6472	-1.3608
REP.B009_A549_24H:E11	BRD-K29530284	amlexanox	A549	trt_cp	0.03 uM	24 h	2	86	0.09	0.0889613	1	1	1	1	0	Histamine receptor antagonist	FGF1|IL3|PDE4A|PDE4B|PDE4C|PDE4D|S100A12|S100A13	-0.3519	0.6472	-1.3608
REP.A003_JURKAT_24H:M03	BRD-K35245662	ciclesonide	JURKAT	trt_cp	1.11 uM	24 h	2	59	0.4226	0.159669	0	0	1	1	0	Glucocorticoid receptor agonist	NR3C1|SERPINA6	-0.3519	0.6472	-1.3607
CPC016_ASC_24H:BRD-A30655177-001-06-6:10	BRD-A30655177	LFM-A13	ASC	trt_cp	10 uM	24 h	2	340	0.15	0.228358	0	0	1	1	0	BTK inhibitor	BTK	-0.3519	0.6472	-1.3606
REP.A007_HELA_24H:H19	BRD-K52080565	nandrolone	HELA	trt_cp	10 uM	24 h	3	496	0.7563	0.619325	1	1	1	1	0	Imidazoline receptor agonist	NISCH|AR|CYP19A1|MAOA|MAOB	-0.3519	0.6472	-1.3605
REP.A004_A375_24H:I01	BRD-K22749967	ABT-239	A375	trt_cp	10 uM	24 h	3	247	0.4579	0.340067	1	1	1	1	0	Histamine receptor antagonist	HRH3|HRH1|HRH2	-0.3519	0.6472	-1.3605
CPC014_PC3_6H:BRD-K04923131-001-06-3:10	BRD-K04923131	BRD-K04923131	PC3	trt_cp	10 uM	6 h	4	234	0.53	0.356104	1	1	1	1	0	GSK inhibitor|Lipoxygenase inhibitor	GSK3B|ALOX5|GSK3A	-0.3517	0.6472	-1.36
CPC018_PHH_24H:BRD-K15601958-001-01-3:10	BRD-K15601958	SEW-2871	PHH	trt_cp	10 uM	24 h	3	49	0.02	0.0316551	0	0	1	1	0	Lysophospholipid receptor agonist	S1PR1	-0.3517	0.6472	-1.36
PCL001_HA1E_24H:BRD-K39841531:10	BRD-K39841531	TG-101209	HA1E	trt_cp	10 uM	24 h	2	696	0.73	0.72077	0	0	1	1	0	JAK inhibitor	JAK2|JAK3	-0.3516	0.6472	-1.3596
CPC013_NPC_24H:BRD-K29905972-001-03-0:10	BRD-K29905972	axitinib	NPC	trt_cp	10 uM	24 h	3	503	0.65	0.578191	0	0	1	1	0	VEGFR inhibitor|PDGFR inhibitor	KDR|FLT1|FLT4|CYP2C19|CYP3A5|KIT|PDGFRB|CSF1|PLK4	-0.3516	0.6472	-1.3596
CPC005_A549_24H:BRD-K88172511-310-03-8:10	BRD-K88172511	naltrexone	A549	trt_cp	10 uM	24 h	3	74	0.18	0.116703	1	1	1	1	0	Opioid receptor antagonist	OPRK1|OPRM1|OPRD1|SIGMAR1	-0.3516	0.6472	-1.3596
REP.A023_MDAMB231_24H:D13	BRD-A68464583	mazindol	MDAMB231	trt_cp	10 uM	24 h	2	63	0.2945	0.137735	1	1	1	1	0	Dopamine receptor antagonist|Serotonin reuptake inhibitor	SLC6A3|SLC6A4|SLC6A2	-0.3516	0.6472	-1.3595
MOAR002_PC3_24H:H10	BRD-A74904029	EI-231	PC3	trt_cp	10 uM	24 h	3	178	0.38	0.262986	1	1	1	1	0	Casein kinase inhibitor	CSNK2A1	-0.3516	0.6472	-1.3593
REP.A018_HT29_24H:P10	BRD-K67121414	apixaban	HT29	trt_cp	0.37 uM	24 h	3	177	0.313	0.238007	0	0	1	1	0	Coagulation factor inhibitor	F10|CYP2C19|CYP2C8|CYP2J2	-0.3515	0.6472	-1.359
CPC010_MCF7_24H:BRD-K28143534-003-20-0:10	BRD-K28143534	cyproheptadine	MCF7	trt_cp	10 uM	24 h	4	506	0.65	0.579913	1	1	1	1	0	Histamine receptor antagonist	HRH1|HTR2B|ADRA1A|ADRA1B|ADRA1D|CHRM1|CHRM2|CHRM3|HTR2A|HTR2C|HTR6|HTR7	-0.3514	0.6471	-1.3589
CPC014_ASC_24H:BRD-K99545815-001-01-4:10	BRD-K99545815	PF-562271	ASC	trt_cp	10 uM	24 h	3	594	0.69	0.647364	1	1	1	1	0	Focal adhesion kinase inhibitor	PTK2|PTK2B	-0.3514	0.6465	-1.3588
CPC005_A375_24H:BRD-A65597028-003-02-4:10	BRD-A65597028	RX-821002	A375	trt_cp	10 uM	24 h	3	174	0.24	0.206638	1	0	1	1	0	Adrenergic receptor antagonist	ADRA2A|ADRA2B|ADRA2C|ADRA1A|ADRA1B|ADRA1D	-0.3514	0.6458	-1.3586
REP.B017_MCF10A_24H:J24	BRD-A66155091	trilostane	MCF10A	trt_cp	0.01 uM	24 h	2	119	0.2926	0.188687	1	1	1	1	0	3beta-hydroxy-delta5-steroid dehydrogenase inhibitor	ESR2|ESR1|HSD3B2|JUN|NR3C1|HSD3B1	-0.3514	0.6458	-1.3586
CPC015_A549_6H:BRD-A68930007-001-03-1:10	BRD-A68930007	ouabain	A549	trt_cp	10 uM	6 h	2	195	0.38	0.275258	0	0	1	1	0	Na/K-ATPase inhibitor	ATP1A1|ATP1A2|ATP1A3|ATP1A4|ATP1B1|ATP1B2|ATP1B3|ATP1B4|FXYD2	-0.3513	0.6458	-1.3585
REP.A008_HA1E_24H:F02	BRD-K33251802	miglustat	HA1E	trt_cp	3.33 uM	24 h	3	304	0.402	0.353493	0	0	1	1	0	Glycosylation inhibitor	UGCG|GAA|SLC5A4	-0.3513	0.6458	-1.3585
PBIOA021_HA1E_24H:P24	BRD-K33240821	plerixafor	HA1E	trt_cp	0.04 uM	24 h	3	297	0.12	0.190897	0	0	1	1	0	CC chemokine receptor antagonist	CXCR4|ACKR3|CCR4	-0.3513	0.6457	-1.3583
CPC013_NEU_24H:BRD-K59369769-001-07-0:10	BRD-K59369769	tozasertib	NEU	trt_cp	10 uM	24 h	2	101	0.38	0.198099	0	0	1	1	0	Aurora kinase inhibitor|Bcr-Abl inhibitor|FLT3 inhibitor|JAK inhibitor	AURKA|AURKB|ABL1|AURKC|BCR|FLT3|JAK2|DDR2|LCK	-0.3513	0.6457	-1.3583
CPC003_HCC515_24H:BRD-K38197229-001-17-4:10	BRD-K38197229	bumetanide	HCC515	trt_cp	10 uM	24 h	3	210	0.18	0.196597	1	0	1	1	0	Solute carrier family member inhibitor	SLC12A1|SLC12A2|CFTR|GPR35|SLC12A4|SLC12A5	-0.3513	0.6457	-1.3583
CPC016_NEU_24H:BRD-K46317332-003-10-3:10	BRD-K46317332	proadifen	NEU	trt_cp	10 uM	24 h	3	411	0.06	0.158791	0	0	1	1	0	Nitric oxide synthase inhibitor	NOS1	-0.3513	0.6455	-1.3582
REP.A015_A375_24H:L07	BRD-K59331299	voglibose	A375	trt_cp	10 uM	24 h	3	484	0.4258	0.459046	1	0	1	1	0	Glucosidase inhibitor	GAA|MGAM	-0.3513	0.6456	-1.3582
NMH001_NEU_24H:BRD-K47029922-001-02-0:10	BRD-K47029922	tranylcypromine	NEU	trt_cp	10 uM	24 h	3	495	0.63	0.564681	0	0	1	1	0	Monoamine oxidase inhibitor	MAOA|MAOB|KDM1A|CYP2A6	-0.3512	0.6452	-1.3581
CPC018_ASC_24H:BRD-K32292990-001-01-0:10	BRD-K32292990	CGP-53353	ASC	trt_cp	10 uM	24 h	3	77	0.19	0.122307	1	0	1	1	0	EGFR inhibitor|PKC inhibitor	EGFR|PRKCB	-0.3511	0.641	-1.3578
CPC020_PC3_24H:BRD-A36217750-001-14-8:10	BRD-A36217750	sulfinpyrazone	PC3	trt_cp	10 uM	24 h	5	187	0.12	0.151475	1	0	1	1	0	Uricosuric	ABCC1|SLC22A12|ABCC2|FPR1	-0.3512	0.641	-1.3578
CPC017_HEPG2_6H:BRD-K07220430-001-03-6:10	BRD-K07220430	cinnarizine	HEPG2	trt_cp	10 uM	6 h	2	118	0.22	0.162923	1	1	1	1	0	Calcium channel blocker	HRH1	-0.3511	0.641	-1.3577
CPC014_NEU_24H:BRD-K67578145-001-01-4:10	BRD-K67578145	GDC-0879	NEU	trt_cp	10 uM	24 h	2	81	0.16	0.115115	0	0	1	1	0	RAF inhibitor	BRAF	-0.3511	0.641	-1.3577
CPC004_HA1E_24H:BRD-A09467419-003-14-1:10	BRD-A09467419	mebeverine	HA1E	trt_cp	10 uM	24 h	3	103	0.17	0.133805	1	0	1	1	0	Acetylcholine receptor antagonist	CHRM1|CHRM2|CHRM3|CHRM4	-0.3511	0.641	-1.3576
REP.A022_YAPC_24H:L16	BRD-K67789209	adatanserin	YAPC	trt_cp	0.37 uM	24 h	3	152	0.3123	0.220312	1	1	1	1	0	Serotonin receptor agonist|Serotonin receptor antagonist	HTR1A|HTR2A	-0.351	0.641	-1.3574
CPC010_HCC515_6H:BRD-K93034159-001-20-9:10	BRD-K93034159	cladribine	HCC515	trt_cp	10 uM	6 h	3	245	0.27	0.260073	1	1	1	1	0	Adenosine deaminase inhibitor|Ribonucleoside reductase inhibitor	ADA|PNP|POLA1|POLE|POLE2|POLE3|POLE4|RRM1|RRM2|RRM2B	-0.351	0.641	-1.3573
CPC018_SKB_24H:BRD-K40530731-001-02-5:10	BRD-K40530731	hyoscyamine	SKB	trt_cp	10 uM	24 h	3	283	0.21	0.246509	0	0	1	1	0	Acetylcholine receptor antagonist	CHRM1|CHRM2|CHRM3|CHRM4	-0.351	0.641	-1.3572
CPC004_HEPG2_6H:BRD-K70778732-003-15-0:10	BRD-K70778732	trazodone	HEPG2	trt_cp	10 uM	6 h	3	84	0.23	0.140551	1	0	1	1	0	Adrenergic receptor antagonist|Serotonin receptor antagonist|Serotonin reuptake inhibitor	SLC6A4|HTR2A|HTR2C|ADRA1A|ADRA2A|HRH1|HTR1A|HTR2B	-0.351	0.641	-1.3571
REP.A007_HT29_24H:P19	BRD-A51964809	halofantrine	HT29	trt_cp	10 uM	24 h	3	208	0.3992	0.291379	0	0	1	1	0	Antimalarial	CYP3A5|KCNH2|KCNN4	-0.351	0.641	-1.3571
CPC017_ASC_24H:BRD-A93236127-001-03-7:10	BRD-A93236127	digitoxin	ASC	trt_cp	10 uM	24 h	4	588	0.8	0.693528	1	1	1	1	0	Na/K-ATPase inhibitor	ATP1A1	-0.3509	0.641	-1.3568
LJP007_A549_24H:B07	BRD-K22096725	ALW-II-49-7	A549	trt_cp	10 uM	24 h	4	220	0.2944	0.257342	1	0	1	1	0	Ephrin inhibitor	DDR1	-0.3509	0.641	-1.3568
CPC003_HCC515_24H:BRD-K18799075-001-01-0:10	BRD-K18799075	BAY-59-3074	HCC515	trt_cp	10 uM	24 h	3	169	0.09	0.124708	1	0	1	1	0	Cannabinoid receptor antagonist	CNR1|CNR2	-0.3509	0.641	-1.3567
CPC001_PC3_24H:O10	BRD-K76064317	BRD-K76064317	PC3	trt_cp	10 uM	24 h	5	313	0.1185	0.194743	1	0	1	1	0	FLT3 inhibitor	FLT3	-0.3509	0.641	-1.3567
REP.A005_A375_24H:F06	BRD-K08832567	naringenin	A375	trt_cp	0.04 uM	24 h	3	79	0.2507	0.142305	1	1	1	1	0	Aromatase inhibitor|TRPV antagonist	CYP19A1|ESR2|CYP1B1|GLO1|HSD17B1	-0.3508	0.641	-1.3566
CPC016_NEU_24H:BRD-K67537649-001-01-1:10	BRD-K67537649	PQ-401	NEU	trt_cp	10 uM	24 h	3	230	0.38	0.298942	0	0	1	1	0	IGF-1 inhibitor	IGF1R	-0.3507	0.641	-1.3562
REP.B013_JURKAT_24H:A10	BRD-K37289225	clozapine	JURKAT	trt_cp	0.08 uM	24 h	2	125	0.2354	0.173456	0	0	1	1	0	Serotonin receptor antagonist|Dopamine receptor antagonist	DRD4|DRD2|DRD3|HTR2A|ADRA1A|ADRA1B|CHRM1|DRD1|HRH1|HRH4|HTR1A|HTR1B|HTR1D|HTR1E|HTR2C|HTR6|HTR7|CYP2C19|ADRA1D|ADRA2A|ADRA2B|ADRA2C|CALY|CHRM2|CHRM3|CHRM4|CHRM5|DRD5|HTR1F|HTR2B|HTR3A|HTR5A	-0.3508	0.641	-1.3562
CPC017_ASC_24H:BRD-K58938839-001-03-8:10	BRD-K58938839	cyclopamine	ASC	trt_cp	10 uM	24 h	4	356	0.33	0.346587	0	0	1	1	0	Smoothened receptor antagonist	SMO	-0.3507	0.641	-1.3561
REP.A012_MCF10A_24H:B07	BRD-A00147595	balaglitazone	MCF10A	trt_cp	10 uM	24 h	3	113	0.3026	0.186984	1	1	1	1	0	Insulin sensitizer|PPAR receptor agonist	PPARG|INS	-0.3507	0.6408	-1.3559
REP.B013_PC3_24H:F21	BRD-M39350793	reboxetine	PC3	trt_cp	0.25 uM	24 h	2	70	0.1291	0.0961264	0	0	1	1	0	Adrenergic receptor antagonist	SLC6A2	-0.3507	0.6408	-1.3559
REP.A002_HELA_24H:H08	BRD-K16762525	BRD-K16762525	HELA	trt_cp	3.33 uM	24 h	3	99	0.3605	0.19103	1	1	1	1	0	Bacterial 50S ribosomal subunit inhibitor	CYP3A4|CYP2C19|CYP3A5|CYP3A7	-0.3506	0.6405	-1.3556
LJP001_MDAMB231_24H:BRD-K99616396-001-02-8:0.4	BRD-K99616396	motesanib	MDAMB231	trt_cp	0.37 uM	24 h	4	67	0.25	0.130869	1	0	1	1	0	KIT inhibitor|PDGFR inhibitor|VEGFR inhibitor	FLT1|FLT4|KDR|KIT|PDGFRA|RET	-0.3506	0.6404	-1.3555
CPC018_MCF7_6H:BRD-K40578143-001-01-8:10	BRD-K40578143	GR-79236	MCF7	trt_cp	10 uM	6 h	3	72	0.12	0.0939913	1	0	1	1	0	Adenosine receptor agonist	ADORA1|ADORA2A	-0.3506	0.6404	-1.3555
REP.A012_MCF10A_24H:I07	BRD-K02113016	olaparib	MCF10A	trt_cp	10 uM	24 h	3	140	0.2727	0.197577	1	1	1	1	0	PARP inhibitor	PARP1|PARP2|PARP3	-0.3506	0.6405	-1.3555
REP.B016_MCF10A_24H:B16	BRD-K51263939	sarcosine	MCF10A	trt_cp	0.08 uM	24 h	2	51	0.1294	0.0821453	1	1	1	1	0	GlyT-1 inhibitor	SLC6A9	-0.3505	0.6404	-1.3554
CPC010_VCAP_24H:BRD-K12102668-001-20-6:10	BRD-K12102668	nialamide	VCAP	trt_cp	10 uM	24 h	4	383	0.41	0.400702	0	0	1	1	0	Monoamine oxidase inhibitor	COMT|MAOA|MAOB	-0.3506	0.6404	-1.3554
REP.B012_A375_24H:P03	BRD-A03216249	mepivacaine	A375	trt_cp	0.25 uM	24 h	2	145	0.2847	0.205451	0	0	1	1	0	Potassium channel antagonist|Sodium channel inhibitor	SCN9A|SCN10A	-0.3505	0.6401	-1.3553
REP.A015_MCF7_24H:K23	BRD-K59433843	ICI-192605	MCF7	trt_cp	0.125 uM	24 h	3	198	0.3564	0.268616	1	1	1	1	0	Thromboxane receptor antagonist	TBXA2R	-0.3505	0.6401	-1.3552
CPC006_HT29_24H:BRD-K06854232-001-03-3:10	BRD-K06854232	AM-580	HT29	trt_cp	10 uM	24 h	4	117	0.25	0.172939	1	1	1	1	0	Retinoid receptor agonist	RARA	-0.3505	0.6397	-1.3551
CPC020_A549_6H:BRD-K98763141-001-19-1:10	BRD-K98763141	niflumic-acid	A549	trt_cp	10 uM	6 h	2	112	0.26	0.172554	0	0	1	1	0	Cyclooxygenase inhibitor	CLCNKA|PTGS2|ANO1|CLCN1|CLCNKB|KCNQ1|PLA2G1B|PLA2G4A|PTGS1|UGT1A9	-0.3504	0.6393	-1.355
CPC016_NEU_24H:BRD-K29582677-300-06-4:10	BRD-K29582677	flunarizine	NEU	trt_cp	10 uM	24 h	3	214	0.28	0.247524	0	0	1	1	0	Calcium channel blocker	CACNA1G|CACNA1H|CYP2J2|CACNA1I|CALM1|HRH1	-0.3504	0.6394	-1.355
CPC006_H1299_6H:BRD-K70642949-001-01-1:0.1	BRD-K70642949	GSK-2334470	H1299	trt_cp	0.12 uM	6 h	2	56	0.23	0.114759	0	0	1	1	0	PDK inhibitor	PDPK1|AURKA|AURKB|PDK1	-0.3504	0.637	-1.3547
CPC014_A549_24H:BRD-K93331255-001-01-2:10	BRD-K93331255	lypressin	A549	trt_cp	10 uM	24 h	3	85	0.21	0.135098	0	0	1	1	0	Vasopressin receptor agonist	AVPR1A|AVPR1B|AVPR2	-0.3503	0.6348	-1.3545
REP.B012_A549_24H:M23	BRD-K03194791	roflumilast	A549	trt_cp	0.03 uM	24 h	2	147	0.3596	0.232487	0	0	1	1	0	Phosphodiesterase inhibitor	PDE4A|PDE4B|PDE4C|PDE4D|CYP2B6|CYP2C19	-0.3503	0.6333	-1.3544
CPC018_ASC_24H:BRD-K41567364-001-01-2:10	BRD-K41567364	SB-334867	ASC	trt_cp	10 uM	24 h	3	218	0.17	0.194663	1	0	1	1	0	Orexin receptor antagonist	HCRTR1|HCRTR2	-0.3503	0.6336	-1.3544
CPC016_SKB_24H:BRD-K82731415-001-05-4:10	BRD-K82731415	olomoucine	SKB	trt_cp	10 uM	24 h	3	337	0.58	0.447054	0	0	1	1	0	CDK inhibitor	CDK1|CDK2|CDK5|MAPK1	-0.3503	0.6336	-1.3544
CPC006_A375_24H:BRD-K39503511-001-02-1:80	BRD-K39503511	quiflapon	A375	trt_cp	80 uM	24 h	5	528	0.7	0.614747	1	1	1	1	0	Leukotriene inhibitor	ALOX5AP|ALOX5	-0.3503	0.6341	-1.3544
CPC001_HA1E_24H:BRD-K26573499-300-01-3:10	BRD-K26573499	DMAB-anabaseine	HA1E	trt_cp	10 uM	24 h	3	117	0.17	0.142609	1	0	1	1	0	Adrenergic receptor agonist	CHRNA7	-0.3503	0.6331	-1.3543
CPC005_A549_6H:BRD-K56509348-003-01-3:10	BRD-K56509348	BMS-182874	A549	trt_cp	10 uM	6 h	3	166	0.36	0.247193	1	0	1	1	0	Endothelin receptor antagonist	EDNRA	-0.3502	0.6331	-1.3542
CPC014_HCC515_6H:BRD-K43164539-001-05-7:10	BRD-K43164539	cholic-acid	HCC515	trt_cp	10 uM	6 h	3	81	0.23	0.138018	1	1	1	1	0	Bile acid	CES1|FECH|PLA2G1B|ADH1C|COX1|COX2|COX3|COX4I1|COX5A|COX5B|COX6A2|COX6B1|COX6C|COX7A1|COX7B|COX7C|COX8A|ESRRG|FABP6|GPBAR1	-0.3502	0.6331	-1.3542
CPC001_PC3_24H:E21	BRD-K81729199	AQ-RA741	PC3	trt_cp	10 uM	24 h	5	185	0.1889	0.189031	1	0	1	1	0	Acetylcholine receptor antagonist	CHRM2	-0.3502	0.6331	-1.3541
CPC001_VCAP_24H:L09	BRD-A22707317	SB-205384	VCAP	trt_cp	10 uM	24 h	5	172	0.258	0.213012	0	0	1	1	0	GABA receptor antagonist	GABRA3|GABRA5|GABRA6	-0.3502	0.6331	-1.3541
REP.B012_HA1E_24H:D20	BRD-K00673382	famotidine	HA1E	trt_cp	0.74 uM	24 h	2	142	0.3545	0.226873	0	0	1	1	0	Histamine receptor antagonist	HRH2	-0.3502	0.6331	-1.3541
CPC005_VCAP_24H:BRD-K80639402-003-01-1:10	BRD-K80639402	SB-258585	VCAP	trt_cp	10 uM	24 h	5	222	0.29	0.25657	0	0	1	1	0	Serotonin receptor antagonist	HTR6	-0.3502	0.6331	-1.3541
REP.A019_THP1_24H:G21	BRD-K47642186	piclamilast	THP1	trt_cp	1.11 uM	24 h	2	79	0.1107	0.0945623	0	0	1	1	0	Phosphodiesterase inhibitor	PDE4A|PDE4B|PDE4D|PDE4C	-0.3502	0.6331	-1.354
CPC016_A549_6H:BRD-K53523901-001-02-8:10	BRD-K53523901	arctigenin	A549	trt_cp	10 uM	6 h	2	88	0.22	0.140696	0	0	1	1	0	MEK inhibitor	ADIPOR1|AHR|CHUK|MAP2K1	-0.3501	0.6331	-1.3538
REP.B004_HA1E_24H:G02	BRD-K21908111	AZD-1208	HA1E	trt_cp	0.74 uM	24 h	3	159	0.3311	0.232011	1	1	1	1	0	PIM inhibitor	PIM1|PIM2|PIM3	-0.3501	0.6331	-1.3538
REP.B021_HELA_24H:L24	BRD-K84892605	IOWH-032	HELA	trt_cp	0.01 uM	24 h	2	217	0.5685	0.355161	1	1	1	1	0	CFTR channel antagonist	CFTR	-0.3501	0.6331	-1.3537
LJP007_SKL.C_24H:K01	BRD-K40738845	BMS-777607	SKL	trt_cp	10 uM	24 h	3	120	0.2698	0.181946	1	1	1	1	0	AXL kinase inhibitor|FLT3 inhibitor|HGF receptor inhibitor|Macrophage inhibitor|MET inhibitor|Tyrosine kinase inhibitor	MET|AXL|MERTK|MST1R|TYRO3|FLT3	-0.3501	0.6331	-1.3537
CPC018_MCF7_6H:BRD-K17796732-001-02-0:10	BRD-K17796732	JWH-015	MCF7	trt_cp	10 uM	6 h	3	121	0.18	0.149231	1	0	1	1	0	Cannabinoid receptor agonist	CNR2	-0.3501	0.6331	-1.3536
CPC010_A549_6H:BRD-A14208071-004-16-4:10	BRD-A14208071	oxyphenonium	A549	trt_cp	10 uM	6 h	2	90	0.07	0.0802603	1	0	1	1	0	Cholinergic receptor antagonist	CHRM1	-0.35	0.6331	-1.3535
REP.B012_HA1E_24H:C17	BRD-K00610438	altanserin	HA1E	trt_cp	0.03 uM	24 h	2	56	0.1405	0.0896939	0	0	1	1	0	Serotonin receptor antagonist	HTR2A|HTR2C	-0.35	0.6289	-1.3532
REP.A024_MCF10A_24H:B19	BRD-K73794685	azithromycin	MCF10A	trt_cp	10 uM	24 h	3	137	0.3327	0.215882	1	1	1	1	0	Bacterial 50S ribosomal subunit inhibitor	MLNR	-0.3499	0.6288	-1.3531
CPC014_SKB_24H:BRD-K07736136-001-01-2:10	BRD-K07736136	VX-702	SKB	trt_cp	10 uM	24 h	4	100	0.24	0.156652	0	0	1	1	0	P38 MAPK inhibitor	MAPK14|MAPK11|MAPK12	-0.3499	0.6288	-1.3531
REP.A001_HT29_24H:A11	BRD-K25114078	aminoguanidine	HT29	trt_cp	0.125 uM	24 h	3	84	0.145	0.111597	0	0	1	1	0	Nitric oxide synthase inhibitor	NOS2	-0.3499	0.6288	-1.353
REP.A023_JURKAT_24H:A16	BRD-K67966701	lisinopril	JURKAT	trt_cp	0.37 uM	24 h	3	190	0.1654	0.179257	0	0	1	1	0	ACE inhibitor	ACE|ACE2	-0.3499	0.6288	-1.3529
REP.A010_HEK293_24H:E19	BRD-K13050541	acivicin	HEK293	trt_cp	12 uM	24 h	3	280	0.516	0.384357	1	1	1	1	0	Gamma glutamyltransferase Inhibitors	CAD|GGT1|CTPS1	-0.3498	0.6287	-1.3525
REP.A023_A375_24H:N23	BRD-K72166146	BRD-K72166146	A375	trt_cp	0.125 uM	24 h	3	76	0.1922	0.122212	1	1	1	1	0	Serotonin receptor agonist	HTR1D|HTR1B|ADRA2A|DRD2|HTR1E|HTR1F|HTR2B|HTR7	-0.3498	0.6287	-1.3525
CPC006_NCIH596_6H:BRD-K09778810-001-03-1:10	BRD-K09778810	FGIN-1-27	NCIH596	trt_cp	10 uM	6 h	2	39	0.21	0.0915108	1	0	1	1	0	Inositol monophosphatase inhibitor	TSPO	-0.3498	0.6287	-1.3525
CPD001_MCF7_6H:F17	BRD-K44942604	pentolinium	MCF7	trt_cp	10 uM	6 h	3	255	0.0747	0.13956	0	0	1	1	0	Cholinergic receptor antagonist	CHRNA10|CHRNA3|CHRNA4|CHRNB4	-0.3498	0.6287	-1.3525
CPC013_SKB_24H:BRD-K79090631-001-15-7:10	BRD-K79090631	CGP-60474	SKB	trt_cp	10 uM	24 h	4	595	0.64	0.623992	0	0	1	1	0	CDK inhibitor	CDK1|CDK2	-0.3498	0.6287	-1.3524
CPC020_VCAP_6H:BRD-K47679368-001-01-5:10	BRD-K47679368	bromfenac	VCAP	trt_cp	10 uM	6 h	5	130	0.1	0.115293	0	0	1	1	0	Cyclooxygenase inhibitor	PTGS1|PTGS2	-0.3497	0.6286	-1.3523
REP.A010_MCF7_24H:G01	BRD-A13133631	BRD-A13133631	MCF7	trt_cp	10 uM	24 h	3	176	0.5926	0.326564	0	0	1	1	0	Glucocorticoid receptor agonist	NR3C1	-0.3496	0.625	-1.3519
CPC003_HA1E_24H:BRD-K72462751-001-01-9:10	BRD-K72462751	C-1	HA1E	trt_cp	10 uM	24 h	3	494	0.5	0.50255	1	0	1	1	0	Protein kinase inhibitor	PRKCA	-0.3496	0.6262	-1.3519
CPC010_VCAP_24H:BRD-K54314721-001-06-0:10	BRD-K54314721	zolmitriptan	VCAP	trt_cp	10 uM	24 h	5	205	0.1	0.14478	0	0	1	1	0	Serotonin receptor agonist	HTR1B|HTR1D|HTR1A|HTR1F|HTR1E	-0.3496	0.6248	-1.3518
LPROT002_MCF7_6H:BRD-K61688984:3.5	BRD-K61688984	RGFP-966	MCF7	trt_cp	3.33 uM	6 h	3	328	0.33	0.332678	1	0	1	1	0	HDAC inhibitor	HDAC3|HDAC1|HDAC2|ALOX5	-0.3496	0.6219	-1.3517
CPD001_PC3_24H:BRD-A41304429-001-09-8:10	BRD-A41304429	practolol	PC3	trt_cp	10 uM	24 h	3	365	0.36	0.366546	1	0	1	1	0	Adrenergic receptor antagonist	ADRB1	-0.3495	0.6211	-1.3516
PBIOA015_MCF7_24H:F01	BRD-K47114202	chlorogenic-acid	MCF7	trt_cp	10 uM	24 h	3	96	0.27	0.162798	1	1	1	1	0	Antioxidant	SLC37A4	-0.3495	0.6211	-1.3516
PBIOA017_PC3_24H:N01	BRD-K16478699	PLX-4720	PC3	trt_cp	10 uM	24 h	3	348	0.48	0.413277	0	0	1	1	0	RAF inhibitor	BRAF|KDR	-0.3495	0.6204	-1.3515
CPC016_ASC_24H:BRD-K87048468-003-01-9:10	BRD-K87048468	RS-102221	ASC	trt_cp	10 uM	24 h	2	86	0.04	0.0593075	0	0	1	1	0	Serotonin receptor antagonist	HTR2C|HTR2A|HTR2B	-0.3495	0.6209	-1.3515
CPC014_HCC515_6H:BRD-K50720187-050-04-1:10	BRD-K50720187	flupirtine	HCC515	trt_cp	10 uM	6 h	3	290	0.11	0.180603	1	0	1	1	0	Glutamate receptor antagonist	KCNQ2|KCNQ3|ADRA2A|KCNQ1	-0.3495	0.6195	-1.3513
CPC012_NPC_24H:BRD-K02130563-001-06-4:10	BRD-K02130563	panobinostat	NPC	trt_cp	10 uM	24 h	3	492	0.71	0.597644	0	0	1	1	0	HDAC inhibitor	HDAC1|HDAC2|HDAC3|HDAC4|HDAC6|HDAC7|HDAC8|HDAC9	-0.3495	0.6193	-1.3512
REP.B024_MCF10A_24H:I02	BRD-A76747559	rutin	MCF10A	trt_cp	0.74 uM	24 h	2	133	0.2375	0.179717	0	0	1	1	0	Antioxidant|Capillary stabilizing agent|Nitric oxide scavenger	AKR1C3|AKR1B1	-0.3494	0.6191	-1.3511
CPC016_ASC_24H:BRD-K31627533-001-03-8:10	BRD-K31627533	rimexolone	ASC	trt_cp	10 uM	24 h	3	339	0.35	0.348309	1	0	1	1	0	Glucocorticoid receptor agonist	NR3C1|SERPINA6	-0.3494	0.619	-1.351
CPC017_ASC_24H:BRD-K23478508-001-03-7:10	BRD-K23478508	digoxin	ASC	trt_cp	10 uM	24 h	4	568	0.78	0.673057	1	1	1	1	0	Na/K-ATPase inhibitor	ATP1A1|ABCB1|RORC|SLCO1B3	-0.3494	0.619	-1.351
CPC018_HEPG2_6H:BRD-K87919739-001-03-4:10	BRD-K87919739	BRD-K87919739	HEPG2	trt_cp	10 uM	6 h	3	708	0.05	0.190253	0	0	1	1	0	Receptor tyrosine protein kinase inhibitor	ERBB2	-0.3494	0.6187	-1.3509
EMU001_K562_24H:L04	BRD-K92428153	mycophenolate-mofetil	K562	trt_cp	0.125 uM	24 h	2	198	0.5475	0.332932	1	1	1	1	0	Inosine monophosphate dehydrogenase inhibitor|Dehydrogenase inhibitor|Hydroxycarboxylic acid receptor agonist|Immunosuppressant|Inositol monophosphatase inhibitor	IMPDH1|IMPDH2|HCAR2	-0.3494	0.6188	-1.3509
PAC004_U2OS_6H:BRD-K00673382-001-04-9:10	BRD-K00673382	famotidine	U2OS	trt_cp	10 uM	6 h	2	10	0.1	0.0319765	1	0	1	1	0	Histamine receptor antagonist	HRH2	-0.3494	0.619	-1.3509
CPC017_MCF7_6H:BRD-K93201660-001-03-2:10	BRD-K93201660	ML-7	MCF7	trt_cp	10 uM	6 h	4	131	0.15	0.141746	1	0	1	1	0	Muscle relaxant	MYLK	-0.3493	0.6171	-1.3508
REP.B017_YAPC_24H:P03	BRD-K63861289	molsidomine	YAPC	trt_cp	0.25 uM	24 h	2	424	0.6662	0.537422	1	1	1	1	0	Guanylyl cyclase activator	GUCY1A3	-0.3493	0.6174	-1.3508
CPC006_NCIH2073_6H:BRD-K05653692-003-04-7:64	BRD-K05653692	DL-PDMP	NCIH2073	trt_cp	60 uM	6 h	2	133	0.1	0.116616	0	0	1	1	0	Glucosyltransferase inhibitor	UGCG|ASAH1	-0.3492	0.6164	-1.3504
CPC010_HA1E_6H:BRD-K86595100-001-08-3:10	BRD-K86595100	chlordiazepoxide	HA1E	trt_cp	10 uM	6 h	3	244	0.04	0.0998977	1	0	1	1	0	Benzodiazepine receptor agonist	GABRA1|GABRA2|GABRA3|GABRA4|GABRA5|GABRA6|GABRB1|GABRB2|GABRB3|GABRD|GABRE|GABRG1|GABRG2|GABRG3|GABRP|GABRQ	-0.3492	0.6164	-1.3501
CPC016_A549_6H:BRD-K72462751-001-01-9:10	BRD-K72462751	C-1	A549	trt_cp	10 uM	6 h	2	128	0.28	0.191432	0	0	1	1	0	Protein kinase inhibitor	PRKCA	-0.3492	0.6164	-1.3501
NMH001_FIBRNPC_6H:BRD-A65615053-001-01-8:10	BRD-A65615053	zacopride	NPC	trt_cp	10 uM	6 h	2	71	0.03	0.0466681	0	0	1	1	0	Serotonin receptor antagonist	HTR3A|HTR4|HTR3B|HTR5A	-0.3492	0.6164	-1.3501
REP.B023_HT29_24H:D05	BRD-A68281735	REV-5901	HT29	trt_cp	0.003 uM	24 h	2	51	0.1101	0.0757721	1	1	1	1	0	Leukotriene receptor antagonist|Lipoxygenase inhibitor	ALOX5	-0.3492	0.6164	-1.3501
CPC015_ASC_24H:BRD-K68143200-001-04-2:10	BRD-K68143200	NSC-95397	ASC	trt_cp	10 uM	24 h	4	596	0.5	0.552	0	0	1	1	0	CDC inhibitor	CASP3|CDC25A|CDC25B	-0.3492	0.6164	-1.35
REP.A009_THP1_24H:D05	BRD-K28456624	seocalcitol	THP1	trt_cp	0.125 uM	24 h	2	202	0.4478	0.304122	1	1	1	1	0	Vitamin D receptor agonist	VDR	-0.3491	0.6164	-1.3499
LJP007_CD34_24H:A07	BRD-K64857848	XMD-885	CD34	trt_cp	10 uM	24 h	3	332	0.538	0.427357	1	1	1	1	0	MAP kinase inhibitor	MAPK7|LRRK2	-0.349	0.6164	-1.3495
PAC004_U2OS_6H:BRD-K09132007-001-01-8:10	BRD-K09132007	D-4476	U2OS	trt_cp	10 uM	6 h	2	35	0.25	0.0945877	1	1	1	1	0	TGF-beta receptor inhibitor	CSNK1A1|CSNK1D|TGFB1	-0.349	0.6164	-1.3495
REP.A001_HA1E_24H:J08	BRD-K28667793	pyrazinamide	HA1E	trt_cp	3.33 uM	24 h	3	112	0.2492	0.168933	1	1	1	1	0	Fatty acid synthase inhibitor	FASN	-0.349	0.6164	-1.3494
REP.B006_HT29_24H:L08	BRD-A22305049	benfluorex	HT29	trt_cp	0.74 uM	24 h	2	79	0.2135	0.131324	0	0	1	1	0	Gluconeogenesis inhibitor	HMGCR	-0.3489	0.6164	-1.3493
MOAR004_A375_24H:E04	BRD-K07691486	roscovitine	A375	trt_cp	10 uM	24 h	3	379	0.52	0.448902	1	1	1	1	0	CDK inhibitor	CDK2|CDK9|CDK7|CDK1|CDK5	-0.349	0.6164	-1.3493
NMH002_NEU_24H:BRD-A41145729-001-04-3:10	BRD-A41145729	methoprene-acid	NEU	trt_cp	10 uM	24 h	3	70	0.25	0.133767	0	0	1	1	0	Retinoid receptor agonist	RXRA	-0.3489	0.6164	-1.3492
REP.A019_MCF7_24H:C06	BRD-K45158365	valsartan	MCF7	trt_cp	0.04 uM	24 h	3	271	0.414	0.3387	0	0	1	1	0	Angiotensin receptor antagonist	AGTR1	-0.3488	0.6153	-1.3488
CPC004_HCC515_24H:BRD-A62525898-001-04-5:10	BRD-A62525898	prednisone	HCC515	trt_cp	10 uM	24 h	3	81	0.15	0.11146	1	0	1	1	0	Glucocorticoid receptor agonist	NR3C1|HSD11B1	-0.3488	0.615	-1.3487
CPC013_HEPG2_6H:BRD-K28120222-001-05-0:10	BRD-K28120222	BRD-K28120222	HEPG2	trt_cp	10 uM	6 h	3	487	0.59	0.542027	1	0	1	1	0	NFKB inhibitor	IKBKB|RELA	-0.3488	0.6142	-1.3486
REP.B016_HT29_24H:F14	BRD-K52662033	lidocaine	HT29	trt_cp	0.74 uM	24 h	2	89	0.1614	0.121193	1	0	1	1	0	Histamine receptor agonist	SCN5A|SCN10A|SCN9A|EGFR|SCN11A|SCN1A|SCN2A|SCN3A|SCN4A|SCN7A|SCN8A	-0.3488	0.6143	-1.3486
LJP008_HEK293_24H:O15	BRD-A50737080	CGK-733	HEK293	trt_cp	1.11 uM	24 h	2	40	0.1317	0.0733928	1	1	1	1	0	ATM kinase inhibitor|ATR kinase inhibitor	ATM|ATR	-0.3488	0.6139	-1.3485
CPD001_PC3_24H:BRD-K54264597-237-01-9:10	BRD-K54264597	BRD-K54264597	PC3	trt_cp	10 uM	24 h	3	65	0.05	0.0576464	1	0	1	1	0	Mineralocorticoid receptor antagonist	NR3C2	-0.3487	0.6132	-1.3482
REP.A027_A375_24H:L05	BRD-K93461745	buspirone	A375	trt_cp	0.125 uM	24 h	3	133	0.0565	0.0876558	0	0	1	1	0	Serotonin receptor agonist	HTR1A|DRD2	-0.3487	0.6132	-1.3482
REP.B011_YAPC_24H:L03	BRD-K06900071	tebipenem	YAPC	trt_cp	0.25 uM	24 h	2	41	0.13	0.0738234	0	0	1	1	0	Bacterial cell wall synthesis inhibitor	CNR1	-0.3487	0.6129	-1.3481
REP.A018_HELA_24H:D13	BRD-K62734952	arglabin	HELA	trt_cp	10 uM	24 h	3	157	0.3494	0.236833	0	0	1	1	0	Farnesyltransferase inhibitor	FNTA|NFKB1	-0.3486	0.6115	-1.348
REP.B009_THP1_24H:L21	BRD-K31476763	AZD-9668	THP1	trt_cp	0.25 uM	24 h	2	176	0.2784	0.223832	0	0	1	1	0	Elastase inhibitor	ELANE	-0.3486	0.6115	-1.3478
CPC002_PC3_6H:BRD-K87919739-001-03-4:10	BRD-K87919739	BRD-K87919739	PC3	trt_cp	10 uM	6 h	5	149	0.07	0.10327	0	0	1	1	0	Receptor tyrosine protein kinase inhibitor	ERBB2	-0.3485	0.6115	-1.3477
PBIOA021_HCC515_24H:K20	BRD-K29905972	axitinib	HCC515	trt_cp	3.33 uM	24 h	3	123	0.29	0.190977	1	1	1	1	0	VEGFR inhibitor|PDGFR inhibitor	KDR|FLT1|FLT4|CYP2C19|CYP3A5|KIT|PDGFRB|CSF1|PLK4	-0.3485	0.6115	-1.3477
CPC006_NOMO1_6H:BRD-K41895714-001-02-2:10	BRD-K41895714	AS-605240	NOMO1	trt_cp	10 uM	6 h	2	92	0.17	0.126459	1	0	1	1	0	PI3K inhibitor	PIK3CG	-0.3485	0.6115	-1.3476
NMH002_NEU_6H:BRD-K41170226-001-10-4:10	BRD-K41170226	BRD-K41170226	NEU	trt_cp	10 uM	6 h	6	291	0.35	0.322709	0	0	1	1	0	G protein-coupled receptor agonist|Biliverdin reductase A activator	GPBAR1|EFL1|FPR1	-0.3485	0.6115	-1.3476
REP.A026_YAPC_24H:P22	BRD-A15931911	bucladesine	YAPC	trt_cp	0.37 uM	24 h	2	107	0.2212	0.155566	0	0	1	1	0	Adenosine receptor agonist|CAMP stimulant	PRKACA	-0.3485	0.6115	-1.3476
CPC006_NCIH2073_6H:BRD-K49371609-310-01-1:0.09	BRD-K49371609	PIK-75	NCIH2073	trt_cp	0.08 uM	6 h	2	453	0.57	0.513827	0	0	1	1	0	PI3K inhibitor	PIK3CA|PIK3CB|PIK3CD|PIK3CG|PRKDC	-0.3485	0.6102	-1.3474
LUNG001_A549_24H:BRD-K04833372:10	BRD-K04833372	GSK-1904529A	A549	trt_cp	10 uM	24 h	2	153	0.2935	0.214279	1	1	1	1	0	IGF-1 inhibitor	IGF1R|INSR	-0.3485	0.6105	-1.3474
LJP009_NEU_24H:H01	BRD-K53281329	BAY-61-3606	NEU	trt_cp	10 uM	24 h	3	405	0.4078	0.410943	0	0	1	1	0	Syk inhibitor	SYK	-0.3484	0.6097	-1.3471
MOAR006_A375_24H:P04	BRD-A67788537	salermide	A375	trt_cp	10 uM	24 h	3	141	0.29	0.204474	1	1	1	1	0	SIRT inhibitor	SIRT1|SIRT2	-0.3484	0.6099	-1.3471
CPC011_VCAP_6H:BRD-K09471561-001-15-8:10	BRD-K09471561	levofloxacin	VCAP	trt_cp	10 uM	6 h	5	169	0.19	0.181197	0	0	1	1	0	Bacterial DNA Gyrase inhibitor	TOP2A	-0.3484	0.6099	-1.3471
CPC014_A549_6H:BRD-K68174511-001-01-7:10	BRD-K68174511	torin-2	A549	trt_cp	10 uM	6 h	3	418	0.66	0.531118	1	1	1	1	0	MTOR inhibitor	MTOR	-0.3484	0.6087	-1.347
LJP006_HA1E_24H:F15	BRD-K99545815	PF-562271	HA1E	trt_cp	1.11 uM	24 h	3	133	0.39	0.230297	1	1	1	1	0	Focal adhesion kinase inhibitor	PTK2|PTK2B	-0.3484	0.6089	-1.347
CPC010_HCC515_6H:BRD-K59197931-236-16-1:10	BRD-K59197931	naproxen	HCC515	trt_cp	10 uM	6 h	3	73	0.04	0.0546414	1	0	1	1	0	Cyclooxygenase inhibitor	PTGS2|PTGS1	-0.3483	0.6087	-1.3467
CPC020_A549_6H:BRD-K93568044-001-24-7:10	BRD-K93568044	hydrocortisone	A549	trt_cp	10 uM	6 h	2	254	0.4	0.322313	0	0	1	1	0	Glucocorticoid receptor agonist	NR3C1	-0.3483	0.6087	-1.3466
REP.A001_HA1E_24H:A09	BRD-K25114078	aminoguanidine	HA1E	trt_cp	1.11 uM	24 h	3	87	0.2928	0.16139	1	1	1	1	0	Nitric oxide synthase inhibitor	NOS2	-0.3482	0.6087	-1.3464
CPC006_HT29_6H:J04	BRD-K00766422	sparfosic-acid	HT29	trt_cp	80 uM	6 h	5	94	0.0938	0.0949502	1	0	1	1	0	Aspartate carbamoyltransferase inhibitor	CAD	-0.3482	0.6087	-1.3464
CPC018_SKB_24H:BRD-K14965640-001-03-3:10	BRD-K14965640	BRD-K14965640	SKB	trt_cp	10 uM	24 h	3	319	0.15	0.221193	0	0	1	1	0	Cyclooxygenase inhibitor	PTGS2|PTGS1|ASIC1|BCL2|CFTR|FABP2|PLAT|PPARG|SLC5A8|THBD	-0.3482	0.6087	-1.3463
REP.B021_A549_24H:G23	BRD-K82967685	mirodenafil	A549	trt_cp	0.03 uM	24 h	2	213	0.3882	0.290769	0	0	1	1	0	Phosphodiesterase inhibitor	PDE5A	-0.3482	0.6087	-1.3463
LJP007_HUVEC_24H:I13	BRD-K71035033	masitinib	HUVEC	trt_cp	10 uM	24 h	3	230	0.4185	0.31372	1	1	1	1	0	KIT inhibitor|PDGFR inhibitor|Src inhibitor	KIT|FGFR3|LYN|PDGFRB|PDGFRA	-0.3482	0.6087	-1.3462
REP.A024_PC3_24H:L24	BRD-K78113049	enoxacin	PC3	trt_cp	0.04 uM	24 h	3	189	0.3966	0.276846	1	1	1	1	0	Bacterial DNA Gyrase inhibitor	TOP2A	-0.3481	0.6085	-1.3461
REP.B016_HA1E_24H:O14	BRD-A54880345	etomidate	HA1E	trt_cp	0.74 uM	24 h	2	171	0.2815	0.221854	0	0	1	1	0	Membrane integrity inhibitor|Membrane permeability inhibitor|GABA receptor modulator	GABRA1|GABRA2|GABRA3|GABRA4|GABRA5|GABRA6|GABRB1|GABRB2|GABRB3|GABRD|GABRE|GABRG1|GABRG2|GABRG3|GABRP|GABRQ|ADRA2B	-0.3481	0.6086	-1.3461
CPC016_SKB_24H:BRD-A69815203-001-05-0:10	BRD-A69815203	cyclosporin-a	SKB	trt_cp	10 uM	24 h	3	97	0.24	0.154284	1	0	1	1	0	Calcineurin inhibitor	PPIA|PPP3CA	-0.3481	0.6064	-1.3459
CPC016_NPC_24H:BRD-K87048468-003-01-9:10	BRD-K87048468	RS-102221	NPC	trt_cp	10 uM	24 h	4	237	0.19	0.214576	0	0	1	1	0	Serotonin receptor antagonist	HTR2C|HTR2A|HTR2B	-0.3481	0.6064	-1.3459
REP.B005_HT29_24H:J22	BRD-A10012892	argatroban	HT29	trt_cp	0.08 uM	24 h	2	124	0.24	0.17444	0	0	1	1	0	Thrombin inhibitor	F2|CYP3A5	-0.348	0.6064	-1.3457
CPC011_A375_6H:BRD-K97752965-001-10-7:10	BRD-K97752965	nicorandil	A375	trt_cp	10 uM	6 h	3	549	0.25	0.374616	0	0	1	1	0	Nitric oxide donor|Potassium channel activator	ABCC9|KCNJ8|KCNJ11	-0.348	0.6064	-1.3455
CPC015_MCF7_24H:BRD-K26801045-001-01-1:10	BRD-K26801045	pipamperone	MCF7	trt_cp	10 uM	24 h	5	464	0.19	0.300238	1	0	1	1	0	Dopamine receptor antagonist	DRD2|HTR2A|HRH1|HTR1A|HTR1B|HTR1D	-0.348	0.6064	-1.3454
REP.B023_HELA_24H:M02	BRD-K71603915	EVP-6124	HELA	trt_cp	0.74 uM	24 h	2	170	0.3312	0.239939	0	0	1	1	0	Acetylcholine receptor agonist	CHRNA7	-0.3479	0.6064	-1.3453
CPC001_HCC515_24H:BRD-K73397362-001-01-7:10	BRD-K73397362	purmorphamine	HCC515	trt_cp	10 uM	24 h	3	89	0.26	0.15382	1	1	1	1	0	Smoothened receptor agonist	SMO|DHH|IHH|PTCH1	-0.3479	0.6064	-1.3453
CPC002_HA1E_6H:BRD-K82731415-001-05-4:10	BRD-K82731415	olomoucine	HA1E	trt_cp	10 uM	6 h	3	103	0.2	0.145132	1	1	1	1	0	CDK inhibitor	CDK1|CDK2|CDK5|MAPK1	-0.3479	0.6063	-1.3452
CPC015_NPC_24H:BRD-K82941592-238-02-9:10	BRD-K82941592	rosuvastatin	NPC	trt_cp	10 uM	24 h	4	182	0.36	0.258832	0	0	1	1	0	HMGCR inhibitor	HMGCR	-0.3479	0.6064	-1.3452
CPC004_A375_6H:BRD-A77291778-003-15-4:10	BRD-A77291778	cyclopentolate	A375	trt_cp	10 uM	6 h	3	171	0.14	0.156456	1	0	1	1	0	Acetylcholine receptor antagonist	CHRM1	-0.3477	0.6034	-1.3444
CPC018_PHH_24H:BRD-A56012032-001-05-6:10	BRD-A56012032	thiorphan	PHH	trt_cp	10 uM	24 h	3	289	0.32	0.307507	0	0	1	1	0	Membrane integrity inhibitor	MME	-0.3477	0.6031	-1.3443
REP.A021_MCF10A_24H:A18	BRD-K80343549	TAK-285	MCF10A	trt_cp	0.04 uM	24 h	2	454	0.5653	0.512269	0	0	1	1	0	EGFR inhibitor	ERBB2|EGFR	-0.3476	0.6025	-1.3442
REP.A015_MDAMB231_24H:H20	BRD-K58114536	rasagiline	MDAMB231	trt_cp	3.33 uM	24 h	2	63	0.278	0.133821	1	1	1	1	0	Monoamine oxidase inhibitor	MAOB|BCL2	-0.3476	0.6025	-1.3442
MUC.CP008_P1A82_24H:H04	BRD-K43471985	OTX-015	P1A82	trt_cp	0.37 uM	24 h	3	491	0.8	0.633748	1	1	1	1	0	Bromodomain inhibitor	BRD2|BRD3|BRD4|SELE|VCAM1	-0.3476	0.6025	-1.3441
CPC015_PHH_24H:BRD-K70914287-300-01-0:10	BRD-K70914287	BIBX-1382	PHH	trt_cp	10 uM	24 h	2	114	0.23	0.163737	0	0	1	1	0	EGFR inhibitor|Tyrosine kinase inhibitor	EGFR|ERBB2	-0.3476	0.6025	-1.3441
CPC016_ASC_24H:BRD-K91370081-001-10-3:10	BRD-K91370081	anisomycin	ASC	trt_cp	10 uM	24 h	3	291	0.56	0.408198	1	1	1	1	0	DNA inhibitor	RPL10L|RPL11|RPL13A|RPL15|RPL19|RPL23|RPL23A|RPL26L1|RPL3|RPL37|RPL8|RSL24D1|SNU13	-0.3476	0.6025	-1.344
ASG002_PC3_24H:E13	BRD-K51671335	levosulpiride	PC3	trt_cp	10 uM	24 h	3	59	0.0909	0.0740523	1	0	1	1	0	Dopamine receptor antagonist	DRD2|DRD3|CA1|CA12|CA7	-0.3476	0.6025	-1.3439
LJP001_SKBR3_24H:E21	BRD-K19540840	saracatinib	SKBR3	trt_cp	10 uM	24 h	4	292	0.5158	0.39243	1	1	1	1	0	Src inhibitor	SRC|ABL1|LCK|YES1	-0.3476	0.6025	-1.3439
CPC016_NPC_24H:BRD-K92492521-001-01-1:10	BRD-K92492521	LY-255283	NPC	trt_cp	10 uM	24 h	4	466	0.31	0.38433	0	0	1	1	0	Leukotriene receptor antagonist	LTB4R|LTB4R2	-0.3475	0.6025	-1.3438
LJP008_ASC.C_24H:O24	BRD-K09537769	NU-7026	ASC	trt_cp	0.04 uM	24 h	2	81	0.1968	0.127669	1	1	1	1	0	DNA inhibitor|MTOR inhibitor|PI3K inhibitor	PRKDC	-0.3475	0.6025	-1.3435
CPC017_A375_6H:BRD-K69556541-001-02-6:10	BRD-K69556541	ryanodine	A375	trt_cp	10 uM	6 h	3	86	0.1	0.0937734	0	0	1	1	0	Calcium channel blocker	RYR1	-0.3474	0.6003	-1.3433
LJP005_MDAMB231_3H:I01	BRD-K58772419	AZD-6482	MDAMB231	trt_cp	10 uM	3 h	2	82	0.2147	0.134169	1	1	1	1	0	PI3K inhibitor	PIK3CB|PIK3CD|PIK3CG|PIK3CA	-0.3474	0.601	-1.3433
CPC016_SKB_24H:BRD-K56047318-001-03-0:10	BRD-K56047318	RHC-80267	SKB	trt_cp	10 uM	24 h	3	101	0.11	0.106583	1	0	1	1	0	Triacylglycerol lipase inhibitor	LIPC|LIPE|LIPG|DAGLA|DAGLB	-0.3474	0.602	-1.3433
REP.A019_HELA_24H:P11	BRD-K50498985	taladegib	HELA	trt_cp	0.125 uM	24 h	3	221	0.4045	0.302333	0	0	1	1	0	Smoothened receptor antagonist	DHH|IHH|SMO|PTCH1	-0.3474	0.5995	-1.3432
CPC003_VCAP_6H:BRD-K14807180-001-01-7:10	BRD-K14807180	SB-221284	VCAP	trt_cp	10 uM	6 h	5	91	0.15	0.11814	0	0	1	1	0	Serotonin receptor antagonist	HTR2B|HTR2C|HTR2A	-0.3473	0.5986	-1.3431
CPC017_HEPG2_6H:BRD-K34441861-003-01-3:10	BRD-K34441861	moexipril	HEPG2	trt_cp	10 uM	6 h	3	343	0.23	0.284015	1	0	1	1	0	ACE inhibitor	ACE|ACE2	-0.3474	0.5986	-1.3431
CPC017_A375_6H:BRD-A96485169-001-05-1:10	BRD-A96485169	EBPC	A375	trt_cp	10 uM	6 h	3	74	0.03	0.0476439	0	0	1	1	0	Aldose reductase inhibitor	AKR1B1	-0.3473	0.5986	-1.343
CPC017_A549_6H:BRD-K10177585-003-01-6:10	BRD-K10177585	PSB-11	A549	trt_cp	10 uM	6 h	3	105	0.04	0.0655323	1	0	1	1	0	Adenosine receptor antagonist	ADORA3|ADORA1|ADORA2A	-0.3473	0.5986	-1.3428
REP.A020_A549_24H:F14	BRD-K86118762	linsitinib	A549	trt_cp	3.33 uM	24 h	3	298	0.3042	0.304452	0	0	1	1	0	IGF-1 inhibitor	IGF1R|INSR|INSRR	-0.3472	0.5986	-1.3427
CPC016_ASC_24H:BRD-K81709173-001-03-8:10	BRD-K81709173	halcinonide	ASC	trt_cp	10 uM	24 h	3	191	0.28	0.233844	1	0	1	1	0	Glucocorticoid receptor agonist	NR3C1	-0.3472	0.5979	-1.3424
REP.B011_MDAMB231_24H:C01	BRD-A04352665	maraviroc	MDAMB231	trt_cp	2.22 uM	24 h	2	137	0.1826	0.159934	0	0	1	1	0	CC chemokine receptor antagonist	CCR5|CYP3A5	-0.3471	0.5978	-1.3422
REP.B004_HT29_24H:B21	BRD-K19284129	salvinorin-a	HT29	trt_cp	0.25 uM	24 h	2	109	0.0737	0.0906312	0	0	1	1	0	Opioid receptor agonist	OPRK1|OPRD1|OPRM1	-0.3471	0.5978	-1.3422
CPC004_HEPG2_6H:BRD-A93236127-001-03-7:10	BRD-A93236127	digitoxin	HEPG2	trt_cp	10 uM	6 h	3	220	0.47	0.325155	1	1	1	1	0	Na/K-ATPase inhibitor	ATP1A1	-0.3471	0.5978	-1.3421
CPC017_ASC_24H:BRD-K69556541-001-02-6:10	BRD-K69556541	ryanodine	ASC	trt_cp	10 uM	24 h	4	150	0.12	0.135665	1	0	1	1	0	Calcium channel blocker	RYR1	-0.3471	0.5978	-1.3421
REP.A004_HEK293_24H:O07	BRD-A26384407	chlortalidone	HEK293	trt_cp	10 uM	24 h	3	276	0.4577	0.359398	0	0	1	1	0	Carbonic anhydrase inhibitor	CA7|CA1|CA12|CA14|CA4|SLC12A1|SLC12A3	-0.3471	0.5978	-1.342
CPC015_A549_6H:BRD-A55416093-001-03-1:10	BRD-A55416093	colforsin	A549	trt_cp	10 uM	6 h	2	86	0.25	0.148269	0	0	1	1	0	Adenylyl cyclase activator	ADCY2|ADCY5	-0.3471	0.5978	-1.342
REP.A002_HT29_24H:O12	BRD-K18194590	mephentermine	HT29	trt_cp	0.04 uM	24 h	3	122	0.1792	0.149513	0	0	1	1	0	Adrenergic receptor agonist	ADRA1A|ADRA1B|ADRA1D|ADRA2A|ADRA2B|ADRA2C|ADRB1|ADRB2|ADRB3	-0.347	0.5978	-1.3418
REP.B007_HT29_24H:I24	BRD-K52989797	clomipramine	HT29	trt_cp	0.01 uM	24 h	2	129	0.0505	0.0816152	0	0	1	1	0	Serotonin receptor antagonist	SLC6A4|SLC6A2|CYP2C19|GSTP1|HTR2A|HTR2B|HTR2C|SLC6A3	-0.347	0.5978	-1.3418
REP.B026_JURKAT_24H:J22	BRD-K91315211	betahistine	JURKAT	trt_cp	0.08 uM	24 h	2	94	0.1211	0.107886	0	0	1	1	0	Histamine receptor agonist|Histamine receptor antagonist	HRH3|HRH1	-0.347	0.5976	-1.3417
REP.A026_MCF7_24H:C13	BRD-K88506063	KD-025	MCF7	trt_cp	10 uM	24 h	2	222	0.4545	0.321199	0	0	1	1	0	Rho associated kinase inhibitor	ROCK2	-0.347	0.5975	-1.3416
REP.B007_YAPC_24H:L23	BRD-K54759182	dosulepin	YAPC	trt_cp	0.03 uM	24 h	2	313	0.5199	0.407908	1	1	1	1	0	Norepinephrine inhibitor|Serotonin reuptake inhibitor|Tricyclic antidepressant	SLC6A2|SLC6A4|CYP2C19|CHRM1|CHRM2|CHRM3|CHRM4|CHRM5|HRH1	-0.347	0.5975	-1.3416
LJP006_HA1E_24H:K23	BRD-K19220233	JNK-9L	HA1E	trt_cp	0.12 uM	24 h	3	78	0.44	0.187329	1	1	1	1	0	JNK inhibitor	MAPK8	-0.347	0.5976	-1.3416
PBIOA015_HT29_24H:C07	BRD-K37312348	kenpaullone	HT29	trt_cp	15 uM	24 h	3	533	0.82	0.6685	1	1	1	1	0	CDK inhibitor|GSK inhibitor	GSK3B|CDK1|CDK5|CDK2|LCK|CCNB1	-0.3469	0.5972	-1.3415
MOAR001_A375_24H:B24	BRD-A88369366	trelagliptin	A375	trt_cp	1.11 uM	24 h	2	52	0.2946	0.125155	1	1	1	1	0	Dipeptidyl peptidase inhibitor	DPP4	-0.3469	0.5973	-1.3415
CPC006_HT29_24H:BRD-A62182663-001-01-4:10	BRD-A62182663	YK-4279	HT29	trt_cp	10 uM	24 h	4	415	0.67	0.533202	1	1	1	1	0	Apoptosis stimulant|ETV1 inhibitor	EWSR1|FLI1|DHX9	-0.3469	0.5973	-1.3415
REP.A015_MDAMB231_24H:O13	BRD-K61250553	loperamide	MDAMB231	trt_cp	10 uM	24 h	2	101	0.475	0.221482	1	1	1	1	0	Opioid receptor agonist	OPRM1|OPRD1|CYP2B6|CYP2C8|NPR2|CACNA1A|CALM1|OPRK1|POMC	-0.3469	0.5971	-1.3414
CPC005_PC3_6H:BRD-A65767837-001-03-6:10	BRD-A65767837	hydrocortisone-acetate	PC3	trt_cp	10 uM	6 h	3	466	0.2	0.308701	1	0	1	1	0	Corticosteroid agonist|Glucocorticoid receptor agonist	NR3C1|NR3C2	-0.3469	0.5933	-1.3412
LIVB002_HUH7_72H:P04	BRD-K35941380	methysergide	HUH7	trt_cp	10 uM	72 h	3	117	0.09	0.103764	0	0	1	1	0	Serotonin receptor antagonist	HTR2C|HTR1B|HTR1E|HTR1F|HTR2A|HTR2B|HTR7|HTR1A|HTR1D|HTR5A|HTR6	-0.3469	0.5933	-1.3412
LJP009_HUVEC_24H:C01	BRD-K83972459	JWE-035	HUVEC	trt_cp	10 uM	24 h	3	517	0.7514	0.630248	1	1	1	1	0	Aurora kinase inhibitor	AURKA	-0.3469	0.5933	-1.3412
REP.A026_YAPC_24H:E12	BRD-A89164055	sorbinil	YAPC	trt_cp	0.04 uM	24 h	2	198	0.1101	0.149299	0	0	1	1	0	Aldose reductase inhibitor	AKR1B1	-0.3469	0.5933	-1.3412
CPC014_HEPG2_6H:BRD-K73293050-001-01-5:10	BRD-K73293050	WZ-3146	HEPG2	trt_cp	10 uM	6 h	3	323	0.28	0.304096	0	0	1	1	0	EGFR inhibitor	EGFR	-0.3468	0.5931	-1.3409
REP.A023_MDAMB231_24H:B13	BRD-K67102207	phenylbutyrate	MDAMB231	trt_cp	10 uM	24 h	2	273	0.3984	0.333481	1	1	1	1	0	HDAC inhibitor	CYP3A5|HDAC1	-0.3468	0.5918	-1.3408
REP.A011_HA1E_24H:P21	BRD-A33280134	etoposide	HA1E	trt_cp	1.11 uM	24 h	3	188	0.3498	0.25931	0	0	1	1	0	Topoisomerase inhibitor	TOP2A|TOP2B|CYP2E1|CYP3A5	-0.3468	0.5918	-1.3408
REP.A004_YAPC_24H:G06	BRD-K21908111	AZD-1208	YAPC	trt_cp	0.04 uM	24 h	3	208	0.2328	0.222512	0	0	1	1	0	PIM inhibitor	PIM1|PIM2|PIM3	-0.3467	0.5914	-1.3407
CPC006_NOMO1_6H:BRD-K32164935-001-17-5:10	BRD-K32164935	tolazamide	NOMO1	trt_cp	10 uM	6 h	2	540	0.18	0.315256	0	0	1	1	0	ATP channel blocker	ABCC8|KCNJ1|KCNJ10|KCNJ11	-0.3467	0.5906	-1.3405
CPC020_HA1E_6H:BRD-A13946108-001-12-2:10	BRD-A13946108	sulindac	HA1E	trt_cp	10 uM	6 h	3	186	0.11	0.144638	1	0	1	1	0	Cyclooxygenase inhibitor	PTGS1|PTGS2|AKR1B1|MAPK3|PPARD|PTGDR2	-0.3466	0.5898	-1.3403
CPC012_ASC_24H:BRD-K87909389-003-01-8:10	BRD-K87909389	alvocidib	ASC	trt_cp	10 uM	24 h	2	597	0.69	0.648996	0	0	1	1	0	CDK inhibitor	CDK2|CDK4|CDK1|CDK6|CDK7|CDK9|CDK5|CDK8|EGFR|PYGM|BCL2|BIRC5|CCNT1|MCL1|XIAP	-0.3466	0.5889	-1.3402
REP.A004_YAPC_24H:O22	BRD-K27184429	levocetirizine	YAPC	trt_cp	0.37 uM	24 h	3	234	0.305	0.27014	0	0	1	1	0	Histamine receptor antagonist	HRH1|CXCL8	-0.3466	0.5894	-1.3402
REP.A019_YAPC_24H:C01	BRD-K45158365	valsartan	YAPC	trt_cp	10 uM	24 h	3	448	0.4811	0.469448	0	0	1	1	0	Angiotensin receptor antagonist	AGTR1	-0.3466	0.5895	-1.3402
CPC018_SKB_24H:BRD-K17796732-001-02-0:10	BRD-K17796732	JWH-015	SKB	trt_cp	10 uM	24 h	3	121	0.07	0.093062	1	0	1	1	0	Cannabinoid receptor agonist	CNR2	-0.3466	0.5881	-1.34
NMH002_NEU_24H:BRD-K66956375-001-09-7:10	BRD-K66956375	oleoylethanolamide	NEU	trt_cp	10 uM	24 h	3	73	0.3	0.149642	0	0	1	1	0	Cannabinoid receptor agonist|Glucose dependent insulinotropic receptor agonist|Potassium channel blocker|PPAR receptor agonist	GPR119|PPARA|KCND3|CNR1|GPR55	-0.3465	0.588	-1.3399
PAC005_U2OS_6H:BRD-A62021152-003-01-8:10	BRD-A62021152	WAY-161503	U2OS	trt_cp	10 uM	6 h	2	17	0.07	0.0348822	1	0	1	1	0	Serotonin receptor agonist	HTR2C	-0.3465	0.5878	-1.3397
CPC016_HT29_6H:BRD-K18574842-323-03-3:10	BRD-K18574842	nafcillin	HT29	trt_cp	10 uM	6 h	5	105	0.04	0.0655323	1	0	1	1	0	Bacterial cell wall synthesis inhibitor	CYP3A4|CYP1A2|SLC22A6	-0.3465	0.5878	-1.3397
CPC014_HEPG2_6H:BRD-A39052811-377-01-4:10	BRD-A39052811	mosapride	HEPG2	trt_cp	10 uM	6 h	3	422	0.32	0.371588	0	0	1	1	0	Serotonin receptor agonist	HTR4|HTR3A	-0.3464	0.5858	-1.3394
REP.A010_HELA_24H:N24	BRD-K01638814	rilmenidine	HELA	trt_cp	0.04 uM	24 h	3	255	0.4588	0.34587	0	0	1	1	0	Adrenergic receptor agonist|Imidazoline receptor agonist	NISCH|ADRA2A	-0.3464	0.5855	-1.3393
REP.B026_HELA_24H:E20	BRD-K89348303	ramipril	HELA	trt_cp	0.74 uM	24 h	2	83	0.1226	0.102003	1	1	1	1	0	ACE inhibitor	ACE	-0.3464	0.5856	-1.3393
REP.B007_MCF7_24H:D01	BRD-K43797669	genistein	MCF7	trt_cp	2.22 uM	24 h	2	446	0.6344	0.537873	0	0	1	1	0	Tyrosine kinase inhibitor	CFTR|ESR2|EGFR|ESR1|ESRRA|ESRRB|ESRRG|NCOA1|NCOA2|PPARG|PTK2B|TOP2A|TRPC5	-0.3463	0.5849	-1.3392
CPC001_VCAP_24H:J13	BRD-A42553870	L-152804	VCAP	trt_cp	10 uM	24 h	5	100	0.0962	0.0991786	0	0	1	1	0	Neuropeptide receptor antagonist	NPY5R	-0.3463	0.5849	-1.339
CPC011_PC3_24H:BRD-K39391626-001-02-3:10	BRD-K39391626	ethylestrenol	PC3	trt_cp	10 uM	24 h	4	162	0.2	0.182013	1	0	1	1	0	Progesterone receptor agonist	AR	-0.3463	0.5849	-1.3389
REP.A008_HELA_24H:E01	BRD-K32318651	acyclovir	HELA	trt_cp	10 uM	24 h	3	174	0.4306	0.276785	0	0	1	1	0	DNA inhibitor	PNP	-0.3463	0.5849	-1.3389
REP.A009_MCF7_24H:D04	BRD-K28456624	seocalcitol	MCF7	trt_cp	0.37 uM	24 h	2	88	0.3698	0.182413	0	0	1	1	0	Vitamin D receptor agonist	VDR	-0.3463	0.5849	-1.3389
CPC017_NPC_24H:BRD-K29950728-048-08-3:10	BRD-K29950728	clomifene	NPC	trt_cp	10 uM	24 h	4	177	0.22	0.199539	1	0	1	1	0	Estrogen receptor antagonist	ESR1|AR	-0.3462	0.5847	-1.3388
LJP009_HUVEC_24H:H01	BRD-K53281329	BAY-61-3606	HUVEC	trt_cp	10 uM	24 h	3	481	0.768	0.614587	1	1	1	1	0	Syk inhibitor	SYK	-0.3463	0.5848	-1.3388
MOAR005_A375_24H:B08	BRD-K51776215	TC-S-7006	A375	trt_cp	3.33 uM	24 h	3	175	0.45	0.283763	1	1	1	1	0	MAP kinase inhibitor	MAP3K8	-0.3462	0.5843	-1.3387
CPC002_PC3_24H:BRD-K70281171-103-01-1:10	BRD-K70281171	U-99194	PC3	trt_cp	10 uM	24 h	5	115	0.09	0.102873	1	0	1	1	0	Dopamine receptor antagonist	DRD3	-0.3462	0.5846	-1.3387
CPC017_NPC_24H:BRD-K68620903-001-03-1:10	BRD-K68620903	dydrogesterone	NPC	trt_cp	10 uM	24 h	4	202	0.19	0.198099	1	0	1	1	0	Progesterone receptor agonist	PGR	-0.3462	0.5825	-1.3386
LJP002_SKBR3_24H:BRD-K55187425-236-02-9:0.4	BRD-K55187425	rigosertib	SKBR3	trt_cp	0.37 uM	24 h	3	229	0.26	0.246737	0	0	1	1	0	Cell cycle inhibitor|PLK inhibitor	PLK1|MCL1	-0.3462	0.5825	-1.3386
CPC006_NOMO1_6H:BRD-A36318220-001-04-7:160	BRD-A36318220	necrostatin-1	NOMO1	trt_cp	150 uM	6 h	2	128	0.3	0.198151	1	1	1	1	0	RIPK inhibitor	IDO1|KRR1|RIPK1	-0.3461	0.5825	-1.3383
MOAR003_PC3_24H:I17	BRD-K22127577	crenolanib	PC3	trt_cp	3.33 uM	24 h	2	250	0.4769	0.349152	1	1	1	1	0	PDGFR inhibitor	PDGFRB|PDGFRA|CSF1R|FLT3|KIT	-0.3461	0.5825	-1.3383
REP.B019_HA1E_24H:G01	BRD-K47095176	talnetant	HA1E	trt_cp	2.22 uM	24 h	2	195	0.3555	0.266237	1	1	1	1	0	Tachykinin antagonist	TACR3|TACR2	-0.346	0.5825	-1.338
CPC006_H1299_6H:BRD-K64642496-001-01-6:40	BRD-K64642496	KO-143	H1299	trt_cp	40 uM	6 h	2	214	0.29	0.251905	0	0	1	1	0	Breast cancer resistance protein inhibitor	ABCG2|ABCB1|ABCC1	-0.346	0.5825	-1.3379
CPC017_PHH_24H:BRD-K78692225-001-11-2:10	BRD-K78692225	leflunomide	PHH	trt_cp	10 uM	24 h	3	213	0.2	0.208706	0	0	1	1	0	Dihydroorotate dehydrogenase inhibitor|PDGFR inhibitor	DHODH|CYP2C19|JAK3|STAT6|AHR|PTK2B	-0.346	0.5825	-1.3379
CPC015_SKB_24H:BRD-A01593789-001-02-3:10	BRD-A01593789	BRD-A01593789	SKB	trt_cp	10 uM	24 h	2	78	0.34	0.164671	0	0	1	1	0	5-alpha reductase inhibitor	PGR	-0.3459	0.5825	-1.3376
PBIOA014_A549_24H:H01	BRD-K52836380	AZD-7545	A549	trt_cp	12 uM	24 h	3	214	0.33	0.268717	1	1	1	1	0	Pyruvate dehydrogenase kinase inhibitor	PDK2|PDK1	-0.3459	0.5825	-1.3375
AICHI002_HBL1_24H:L13	BRD-K78431006	crizotinib	HBL1	trt_cp	10 uM	24 h	3	291	0.49	0.381834	1	1	1	1	0	ALK inhibitor	ALK|MET|CYP2B6|CYP3A5|MST1R|ROS1	-0.3459	0.5825	-1.3375
CPC004_HCC515_24H:BRD-A73741725-001-01-0:10	BRD-A73741725	exemestane	HCC515	trt_cp	10 uM	24 h	3	133	0.44	0.244615	1	1	1	1	0	Aromatase inhibitor	CYP19A1	-0.3459	0.5825	-1.3373
REP.B018_A375_24H:I21	BRD-K64890080	BI-2536	A375	trt_cp	0.25 uM	24 h	2	376	0.6271	0.491013	1	1	1	1	0	PLK inhibitor	PLK1|BRD4|PLK2|PLK3	-0.3458	0.5825	-1.3371
[truncated: 18,427 more rows]
