# Supplementary material for: Integrating single-nucleus sequence profiling to reveal the transcriptional dynamics of Alzheimer’s disease, Parkinson’s disease, and multiple sclerosis
Source: J Transl Med. 2023 Sep 21;21:649. doi: 10.1186/s12967-023-04516-6 (PMC10515258; doi:10.1186/s12967-023-04516-6)
Supplement: Supplementary file 10 — Additional file 10: Table S9. The Cmap results of PD. [file 12967_2023_4516_MOESM10_ESM.xlsx]

## Sheet: PD
Supplementary Table S9. The Cmap results of PD.
id	pert_id	pert_iname	cell_iname	pert_type	pert_idose	pert_itime	nsample	ss_ngene	cc_q75	tas	qc_pass	is_hiq	is_ncs_sig	is_exemplar_sig	is_null_sig	moa	target_name	raw_cs	fdr_q_nlog10	norm_cs
REP.B017_HEK293_24H:A24	BRD-K50938287	sumatriptan	HEK293	trt_cp	0.01 uM	24 h	2	180	0.333	0.247565	1	1	1	1	0	Serotonin receptor agonist	HTR1D|HTR1B|HTR1A|HTR1F|HTR1E|HTR5A|HTR6|HTR7	-0.7099	15.6536	-2.137
CPC014_PHH_24H:BRD-K98372770-001-04-1:10	BRD-K98372770	L-2167	PHH	trt_cp	10 uM	24 h	4	90	0.08	0.0858019	0	0	1	1	0	PPAR receptor agonist	PPARD	-0.7093	15.6536	-2.1352
CPC015_MCF7_24H:BRD-K28183345-003-07-2:10	BRD-K28183345	proguanil	MCF7	trt_cp	10 uM	24 h	5	99	0.08	0.0899898	1	0	1	1	0	Dihydrofolate reductase inhibitor	CYP2C19|DHFR	-0.6842	15.6536	-2.0595
REP.A012_HELA_24H:D10	BRD-K00603606	ticlopidine	HELA	trt_cp	0.37 uM	24 h	2	71	0.0467	0.0582262	1	1	1	1	0	Purinergic receptor antagonist	P2RY12|CYP2B6|CYP2C19	-0.6753	15.6536	-2.0326
REP.B016_MCF10A_24H:L15	BRD-K55026842	azacitidine	MCF10A	trt_cp	0.25 uM	24 h	2	104	0.2255	0.154853	1	1	1	1	0	DNA methyltransferase inhibitor	DNMT1|DNMT3A	-0.6735	15.6536	-2.0273
CPC002_PC3_24H:BRD-K12079898-001-01-8:10	BRD-K12079898	PD-160170	PC3	trt_cp	10 uM	24 h	5	338	0.41	0.376427	1	1	1	1	0	Neuropeptide receptor antagonist	NPY1R	-0.6653	15.6536	-2.0027
CPC018_HT29_6H:BRD-K08619574-334-03-9:10	BRD-K08619574	thioproperazine	HT29	trt_cp	10 uM	6 h	5	293	0.3	0.299795	1	0	1	1	0	Dopamine receptor antagonist	ADRA1A|ADRA1B|DRD1|DRD2|HTR1A|HTR2A	-0.6619	15.3525	-1.9923
REP.A021_MCF10A_24H:D18	BRD-K81694556	VTP-27999	MCF10A	trt_cp	0.04 uM	24 h	2	152	0.3717	0.240353	1	1	1	1	0	Renin inhibitor	REN	-0.6605	15.3525	-1.9882
REP.B013_HEK293_24H:H09	BRD-A40639672	ketorolac	HEK293	trt_cp	0.25 uM	24 h	2	66	0.1022	0.0830478	1	0	1	1	0	Cyclooxygenase inhibitor	PTGS1|PTGS2	-0.6591	15.3525	-1.9841
LJP009_HEK293_24H:P01	BRD-K68407802	KIN001-055	HEK293	trt_cp	10 uM	24 h	3	192	0.3588	0.265404	1	1	1	1	0	EGFR inhibitor|JAK inhibitor|Leukotriene inhibitor|Mediator release inhibitor	JAK3	-0.6555	3.4758	-1.9731
CPC018_SKB_24H:BRD-A09533288-003-20-5:10	BRD-A09533288	verapamil	SKB	trt_cp	10 uM	24 h	3	238	0.3	0.270196	0	0	1	1	0	Calcium channel blocker	CACNA1C|CACNA1D|CACNA1G|CACNA1S|CYP2C8|CYP2E1|CYP3A5|CYP3A7|DRD2|CACNA1A|CACNA1B|CACNA1F|CACNA1I|CACNB1|CACNB2|CACNB3|CACNB4|CYP3A4|KCNA10|KCNA7|KCNH2|KCNJ11|NALCN|SCN5A|SLC29A4|SLC6A4	-0.6533	1.8698	-1.9665
REP.A022_MCF10A_24H:H13	BRD-K70912147	CO-102862	MCF10A	trt_cp	10 uM	24 h	2	105	0.0807	0.0930812	0	0	1	1	0	Sodium channel inhibitor	SCN2A|SCN4A|SCN9A	-0.6518	1.7298	-1.9622
REP.B020_A549_24H:J08	BRD-K45071273	tetracaine	A549	trt_cp	0.74 uM	24 h	2	113	0.303	0.187107	1	1	1	1	0	Membrane integrity inhibitor	SCN9A|SCN10A|SCN11A|SCN1A|SCN2A|SCN3A|SCN4A|SCN5A|SCN7A|SCN8A	-0.6515	1.7298	-1.9612
CPC010_MCF7_6H:BRD-A72441487-001-04-0:10	BRD-A72441487	stiripentol	MCF7	trt_cp	10 uM	6 h	3	60	0.15	0.0959294	1	0	1	1	0	GABA receptor antagonist	ABAT|SCN1A|SCN3A|GABRA3	-0.6514	1.7298	-1.961
CPC006_PC3_24H:M03	BRD-K28470988	L-690330	PC3	trt_cp	10 uM	24 h	5	159	0.4093	0.257959	1	1	1	1	0	Inositol monophosphatase inhibitor	IMPA1	-0.6489	1.7298	-1.9534
LJP001_MDAMB231_6H:BRD-K93918653-001-03-0:10	BRD-K93918653	quizartinib	MDAMB231	trt_cp	10 uM	6 h	4	120	0.2	0.156652	1	1	1	1	0	FLT3 inhibitor	FLT3|CSF1R|KIT|RET|PDGFRA|PDGFRB	-0.6482	1.7298	-1.9513
REP.A004_YAPC_24H:E06	BRD-A20119038	mecamylamine	YAPC	trt_cp	0.04 uM	24 h	3	82	0.1003	0.0917039	0	0	1	1	0	Acetylcholine receptor antagonist	CHRNA2|CHRNA1|CHRNA3|CHRNA4|CHRNA6|CHRNA7	-0.6428	1.7298	-1.9349
REP.A015_HEK293_24H:A24	BRD-A55913614	primaquine	HEK293	trt_cp	0.04 uM	24 h	2	109	0.2611	0.170588	1	1	1	1	0	Antimalarial|DNA inhibitor	KRT7|NQO2	-0.6395	1.7298	-1.925
CPC001_PC3_6H:BRD-K16444452-001-03-4:10	BRD-K16444452	ibudilast	PC3	trt_cp	10 uM	6 h	4	106	0.26	0.167869	1	1	1	1	0	Phosphodiesterase inhibitor|Leukotriene receptor antagonist	PDE4A|PDE4B|PDE4C|MIF|PDE10A|PDE4D|TLR4|PDE3A|CYSLTR1|PDE11A|IL1B|IL6|PDE5A	-0.6339	1.7298	-1.9083
NMH002_NEU_6H:BRD-K67860401-001-04-9:10	BRD-K67860401	AR-A014418	NEU	trt_cp	10 uM	6 h	3	124	0.28	0.188417	0	0	1	1	0	GSK inhibitor	GSK3B	-0.6334	1.7298	-1.9066
PAC036_U2OS_6H:BRD-K21680192-300-09-4:20	BRD-K21680192	mitoxantrone	U2OS	trt_cp	20 uM	6 h	3	275	0.5	0.374957	1	1	1	1	0	Topoisomerase inhibitor	TOP2A|PIM1	-0.6306	1.7298	-1.8982
CPC006_AGS_6H:BRD-K56343971-001-02-3:10	BRD-K56343971	vemurafenib	AGS	trt_cp	10 uM	6 h	2	216	0.48	0.325595	1	1	1	1	0	RAF inhibitor	BRAF|CYP2C19|CYP3A4|CYP3A5|RAF1	-0.6303	1.7298	-1.8974
CPC006_HEPG2_6H:BRD-K80527266-001-01-7:10	BRD-K80527266	triacsin-c	HEPG2	trt_cp	10 uM	6 h	3	163	0.34	0.238048	1	1	1	1	0	Adrenergic receptor antagonist	ACSL1	-0.6297	1.7298	-1.8955
CPC003_HCC515_24H:BRD-K90333595-003-14-9:10	BRD-K90333595	phentolamine	HCC515	trt_cp	10 uM	24 h	3	63	0.19	0.110631	1	0	1	1	0	Adrenergic receptor antagonist	ADRA1A|ADRA2A|ADRA1B|ADRA1D|ADRA2B|ADRA2C	-0.6291	1.7298	-1.8937
CPC006_SW480_6H:BRD-A14395271-001-01-5:10	BRD-A14395271	mesoridazine	SW480	trt_cp	10 uM	6 h	2	62	0.15	0.0975151	0	0	1	1	0	Dopamine receptor antagonist	DRD2|HTR2A	-0.628	1.7298	-1.8903
REP.B020_HA1E_24H:D19	BRD-K84996356	AZD-3514	HA1E	trt_cp	2.22 uM	24 h	2	171	0.3578	0.25012	1	1	1	1	0	Drugs Acting on Androgen Receptor	AR	-0.6277	1.7298	-1.8896
REP.A022_A549_24H:O13	BRD-K82135108	elesclomol	A549	trt_cp	10 uM	24 h	3	198	0.3129	0.25169	1	1	1	1	0	Oxidizing agent	TOP2A|HSPA1A	-0.6271	1.7298	-1.8878
REP.B004_HELA_3H:F19	BRD-K21295289	senicapoc	HELA	trt_cp	2.22 uM	3 h	3	102	0.2835	0.171952	1	0	1	1	0	Potassium channel blocker	KCNN4	-0.6257	1.7298	-1.8836
REP.A025_YAPC_24H:P24	BRD-K73440166	cinaciguat	YAPC	trt_cp	0.04 uM	24 h	3	183	0.2443	0.213805	1	0	1	1	0	Guanylate cyclase activator	GUCY1B3|GUCY1A3	-0.6258	1.7298	-1.8836
REP.B013_MDAMB231_24H:G10	BRD-K40227168	vinburnine	MDAMB231	trt_cp	0.06 uM	24 h	2	38	0.0714	0.052671	1	0	1	1	0	Adrenergic receptor antagonist	CHRM1|CHRM2|CHRM3|CHRM4	-0.6246	1.7298	-1.8801
CPC006_SW480_6H:BRD-A25004090-001-03-5:4.8	BRD-A25004090	erastin	SW480	trt_cp	4 uM	6 h	2	107	0.35	0.195685	0	0	1	1	0	Ion channel antagonist	VDAC2	-0.6234	1.7298	-1.8766
REP.A001_PC3_24H:D18	BRD-A26095496	clobetasol	PC3	trt_cp	0.04 uM	24 h	2	121	0.2705	0.182939	1	1	1	1	0	Glucocorticoid receptor agonist	NR3C1|PLA2G1B	-0.6209	1.7298	-1.8691
REP.A003_A549_24H:N13	BRD-K35687421	gimeracil	A549	trt_cp	10 uM	24 h	3	129	0.0666	0.0937265	0	0	1	1	0	Dihydropyrimidine dehydrogenase inhibitor	DPYD	-0.6208	1.7298	-1.8688
REP.B022_HA1E_24H:O07	BRD-K81957469	semagacestat	HA1E	trt_cp	2.22 uM	24 h	2	93	0.1889	0.134026	1	1	1	1	0	Gamma secretase inhibitor	PSEN1	-0.6198	1.7298	-1.8658
CPC006_MCF7_24H:H01	BRD-K12762134	XAV-939	MCF7	trt_cp	12 uM	24 h	5	94	0.3086	0.172224	1	1	1	1	0	Tankyrase inhibitor	TNKS|TNKS2	-0.6188	1.7298	-1.8626
CPC014_HEPG2_6H:BRD-K00337317-001-01-7:10	BRD-K00337317	NU-7441	HEPG2	trt_cp	10 uM	6 h	3	239	0.39	0.308718	1	1	1	1	0	P-glycoprotein inhibitor|DNA dependent protein kinase inhibitor	PRKDC|ABCB1	-0.6178	1.7298	-1.8596
REP.B010_HEK293_24H:M19	BRD-K15170068	swainsonine	HEK293	trt_cp	2.5 uM	24 h	2	91	0.1329	0.111202	0	0	1	1	0	Alpha mannosidase inhibitor	MAN2A1	-0.6159	1.7298	-1.8539
CPC001_HA1E_6H:BRD-A26845397-001-01-4:10	BRD-A26845397	isamoltane	HA1E	trt_cp	10 uM	6 h	3	119	0.19	0.152048	1	0	1	1	0	Adrenergic receptor antagonist	ADRB1|ADRB2|HTR1A|HTR1B	-0.6152	1.7298	-1.8517
LJP007_A549_24H:A07	BRD-K64857848	XMD-885	A549	trt_cp	10 uM	24 h	3	247	0.4089	0.321357	1	1	1	1	0	MAP kinase inhibitor	MAPK7|LRRK2	-0.6149	1.7298	-1.8509
CPC015_MCF7_24H:BRD-K62200014-003-05-5:10	BRD-K62200014	anagrelide	MCF7	trt_cp	10 uM	24 h	5	165	0.19	0.17904	1	0	1	1	0	Phosphodiesterase inhibitor	PDE3A	-0.6143	1.7298	-1.8492
REP.B019_HT29_24H:K17	BRD-K49215523	GSK-2636771	HT29	trt_cp	0.03 uM	24 h	2	113	0.2647	0.174883	1	1	1	1	0	PI3K inhibitor	PIK3CB	-0.6135	1.7298	-1.8469
POL001_PC3_24H:C07	BRD-K08132273	tyrphostin	PC3	trt_cp	10 uM	24 h	3	212	0.48	0.322566	1	1	1	1	0	EGFR inhibitor	ERBB2	-0.6126	1.7298	-1.8441
LJP007_YAPC_24H:D13	BRD-K73368362	BIX-02189	YAPC	trt_cp	10 uM	24 h	3	131	0.2982	0.199857	1	1	1	1	0	MEK inhibitor	MAP2K5|MAPK7	-0.612	1.7298	-1.8422
REP.A014_MCF10A_24H:J19	BRD-K57764956	cariprazine	MCF10A	trt_cp	10 uM	24 h	3	144	0.1337	0.140306	1	0	1	1	0	Dopamine receptor antagonist	DRD2|DRD3	-0.6111	1.7298	-1.8396
CPC004_HCC515_24H:BRD-A07440155-003-16-3:10	BRD-A07440155	labetalol	HCC515	trt_cp	10 uM	24 h	3	167	0.45	0.277201	1	1	1	1	0	Adrenergic receptor antagonist	ADRB1|ADRB2|ADRA1A|ADRA1D|ADRA1B	-0.611	1.7298	-1.8393
REP.A016_MDAMB231_24H:N12	BRD-A43331270	niguldipine	MDAMB231	trt_cp	0.04 uM	24 h	3	108	0.2778	0.175149	1	1	1	1	0	Adrenergic receptor antagonist|Calcium channel blocker	ADRA1A|CACNA1C	-0.611	1.7298	-1.8392
CPC001_PC3_24H:D23	BRD-K29173907	isoflupredone-acetate	PC3	trt_cp	10 uM	24 h	5	179	0.1942	0.188531	1	1	1	1	0	Glucocorticoid receptor agonist	NR3C1	-0.6105	1.7298	-1.8377
CPC011_HT29_6H:BRD-K29653726-001-10-0:10	BRD-K29653726	topiramate	HT29	trt_cp	10 uM	6 h	4	62	0.18	0.106822	1	1	1	1	0	Carbonic anhydrase inhibitor|Glutamate receptor antagonist|Kainate receptor antagonist	CA2|CA4|GRIK1|GRIA1|SCN5A|GABRA1|GABRA2|GABRA3|GABRA4|GABRA5|GABRA6|GABRB1|GABRB2|GABRB3|GABRD|GABRE|GABRG1|GABRG2|GABRG3|GABRP|GABRQ|SCN1A|CYP2C19|CYP3A4|CA1|CA12|CA7|GRIA2|GRIA3|GRIA4|GRIK2|GRIK3|GRIK4|GRIK5|SCN10A|SCN11A|SCN2A|SCN3A|SCN4A|SCN7A|SCN8A|SCN9A	-0.6097	1.7298	-1.8354
CPC005_HT29_6H:BRD-K67511046-003-03-7:10	BRD-K67511046	naloxone	HT29	trt_cp	10 uM	6 h	3	86	0.11	0.0983504	1	0	1	1	0	Opioid receptor antagonist	OPRM1|OPRK1|OPRD1|CREB1|ESR1|TLR4	-0.6096	1.7298	-1.8349
CPC005_MCF7_6H:H12	BRD-K95899059	LY-344864	MCF7	trt_cp	10 uM	6 h	4	156	0.1103	0.132642	1	0	1	1	0	Serotonin receptor agonist	HTR1F|HTR1A|HTR1B|HTR1D|HTR1E|HTR2A|HTR2B|HTR2C|HTR7	-0.6076	1.7298	-1.8291
CPC014_VCAP_6H:BRD-K89014967-001-01-9:10	BRD-K89014967	AS-703026	VCAP	trt_cp	10 uM	6 h	5	246	0.37	0.30507	0	0	1	1	0	MEK inhibitor	MAP2K1|MAP2K2	-0.6063	1.7298	-1.8251
REP.B027_HA1E_24H:O21	BRD-A38592941	timonacic	HA1E	trt_cp	0.25 uM	24 h	2	81	0.0973	0.0897696	1	0	1	1	0	Antioxidant	ANXA5	-0.6063	1.7298	-1.825
REP.A016_HEK293_24H:A10	BRD-K81672972	dinoprost	HEK293	trt_cp	0.37 uM	24 h	3	159	0.4368	0.266484	1	1	1	1	0	Prostacyclin analog	PTGFR|PTGDR|PTGER1|PTGER3|PTGER4|PTGDR2|PTGER2|PTGIR|TBXA2R	-0.6054	1.7298	-1.8223
CPC011_A549_6H:BRD-K52662033-001-15-8:10	BRD-K52662033	lidocaine	A549	trt_cp	10 uM	6 h	3	339	0.51	0.420451	1	1	1	1	0	Histamine receptor agonist	SCN5A|SCN10A|SCN9A|EGFR|SCN11A|SCN1A|SCN2A|SCN3A|SCN4A|SCN7A|SCN8A	-0.6052	1.7298	-1.8219
CPC016_SKB_24H:BRD-K68103045-001-01-1:10	BRD-K68103045	CGS-20625	SKB	trt_cp	10 uM	24 h	3	159	0.18	0.171067	1	0	1	1	0	Benzodiazepine receptor agonist	GABRA1|GABRA2|GABRA3|GABRA5|GABRA4|GABRA6	-0.6048	1.7298	-1.8205
CPC005_PC3_24H:BRD-K55424922-003-01-0:10	BRD-K55424922	anpirtoline	PC3	trt_cp	10 uM	24 h	5	168	0.09	0.124339	1	0	1	1	0	Serotonin receptor agonist	HTR1B|HTR3A	-0.604	1.7298	-1.8182
REP.B008_YAPC_24H:C01	BRD-K36740062	GSK-1070916	YAPC	trt_cp	2.22 uM	24 h	2	203	0.4888	0.318525	1	1	1	1	0	Aurora kinase inhibitor	AURKB|AURKC|AURKA|CYP2D6|CYP3A4	-0.6038	1.7298	-1.8176
REP.A011_MCF10A_24H:C15	BRD-K04804440	ciprofloxacin	MCF10A	trt_cp	1.11 uM	24 h	3	42	0.0828	0.0596308	1	0	1	1	0	Bacterial DNA Gyrase inhibitor	TOP2A	-0.6034	1.7298	-1.8163
CPC018_PHH_24H:BRD-K31920458-001-03-8:10	BRD-K31920458	mestranol	PHH	trt_cp	10 uM	24 h	3	129	0.07	0.0960892	0	0	1	1	0	Estrogen receptor agonist	ESR1	-0.603	1.7298	-1.8151
CPC006_A549_6H:BRD-A36318220-001-04-7:160	BRD-A36318220	necrostatin-1	A549	trt_cp	150 uM	6 h	4	129	0.4	0.229697	1	1	1	1	0	RIPK inhibitor	IDO1|KRR1|RIPK1	-0.6026	1.7298	-1.8138
CPC017_PHH_24H:BRD-A03816571-001-01-0:10	BRD-A03816571	CP-55940	PHH	trt_cp	10 uM	24 h	3	90	0.11	0.100612	0	0	1	1	0	Cannabinoid receptor agonist	CNR1|CNR2|GPR55	-0.6019	1.7298	-1.812
REP.B015_HT29_24H:J09	BRD-K58736316	cianidanol	HT29	trt_cp	0.25 uM	24 h	2	73	0.1791	0.115622	1	1	1	1	0	Fatty acid synthase inhibitor	FASN|SCN5A|PTGS1	-0.6012	1.7298	-1.8096
REP.A015_JURKAT_24H:I21	BRD-K59013864	AM-24	JURKAT	trt_cp	1.11 uM	24 h	2	67	0.0431	0.0543384	0	0	1	1	0	Lipoxygenase inhibitor	ALOX5|SELL	-0.6011	1.7298	-1.8094
MOAR017_HAP1.BRD4_24H:C02	BRD-K43471985	OTX-015	HAP1	trt_cp	0.66 uM	24 h	3	272	0.5804	0.401771	1	1	1	1	0	Bromodomain inhibitor	BRD2|BRD3|BRD4|SELE|VCAM1	-0.6001	1.7298	-1.8065
CPC017_MCF7_6H:BRD-A59943784-001-01-8:10	BRD-A59943784	fluticasone	MCF7	trt_cp	10 uM	6 h	4	130	0.16	0.145835	1	0	1	1	0	Glucocorticoid receptor agonist	NR3C1|PGR	-0.5988	1.7298	-1.8025
LJP007_CD34_24H:C18	BRD-K75308783	SAR-245409	CD34	trt_cp	0.04 uM	24 h	3	87	0.3648	0.180143	1	0	1	1	0	PI3K inhibitor	MTOR|PIK3CG	-0.5976	1.7298	-1.7989
CPC014_PHH_24H:BRD-K70401845-001-02-5:10	BRD-K70401845	erlotinib	PHH	trt_cp	10 uM	24 h	4	82	0.12	0.100306	0	0	1	1	0	EGFR inhibitor	EGFR|NR1I2	-0.5975	1.7298	-1.7986
REP.A020_HEK293_24H:D12	BRD-A84575140	pimobendan	HEK293	trt_cp	0.04 uM	24 h	2	149	0.1909	0.17054	0	0	1	1	0	Calcium channel blocker|Phosphodiesterase inhibitor	PDE3A	-0.596	1.7298	-1.794
CPC010_A375_6H:E20	BRD-A62434282	goserelin	A375	trt_cp	10 uM	6 h	3	53	0.1181	0.0800006	1	0	1	1	0	Luteinizing hormone releasing hormone agonist	GNRHR	-0.5958	1.7298	-1.7935
LPROT001_A375_6H:BRD-K87124298:2	BRD-K87124298	OSI-027	A375	trt_cp	2.22 uM	6 h	3	194	0.4	0.281684	1	1	1	1	0	MTOR inhibitor	MTOR	-0.5952	1.7298	-1.7918
REP.B024_PC3_24H:G09	BRD-K75844781	mCPP	PC3	trt_cp	0.25 uM	24 h	2	169	0.2052	0.188305	0	0	1	1	0	Serotonin receptor agonist	HTR2B|HTR2C|HTR1D|HTR2A|HTR1A|HTR1E|HTR6	-0.5951	1.7298	-1.7915
CPC018_PHH_24H:BRD-K38903228-001-02-8:10	BRD-K38903228	hesperidin	PHH	trt_cp	10 uM	24 h	3	82	0.23	0.138868	0	0	1	1	0	Flavanone glycoside	CACNA1B	-0.5949	1.7298	-1.7907
REP.B013_MDAMB231_24H:D19	BRD-K38183498	clonazepam	MDAMB231	trt_cp	2.22 uM	24 h	2	64	0.0474	0.0556942	1	0	1	1	0	GABA receptor agonist	GABRA1|GABRA2|GABRA3|GABRA5|GABRA4|GABRA6|GABRB1|GABRB2|GABRB3|GABRD|GABRE|GABRG1|GABRG2|GABRG3|GABRP|GABRQ|TSPO	-0.5946	1.7298	-1.7899
CPC017_MCF7_24H:BRD-K52721684-001-02-2:10	BRD-K52721684	PCO-400	MCF7	trt_cp	10 uM	24 h	4	100	0.06	0.078326	1	0	1	1	0	Potassium channel activator	KCNJ8|ABCC9	-0.5941	1.7298	-1.7883
REP.A013_MDAMB231_24H:M16	BRD-K43164539	cholic-acid	MDAMB231	trt_cp	0.37 uM	24 h	3	67	0.1989	0.116731	1	0	1	1	0	Bile acid	CES1|FECH|PLA2G1B|ADH1C|COX1|COX2|COX3|COX4I1|COX5A|COX5B|COX6A2|COX6B1|COX6C|COX7A1|COX7B|COX7C|COX8A|ESRRG|FABP6|GPBAR1	-0.5938	1.7298	-1.7874
REP.A010_A549_24H:M15	BRD-K15010214	emedastine	A549	trt_cp	1.11 uM	24 h	3	100	0.1544	0.125648	1	0	1	1	0	Histamine receptor antagonist	HRH1	-0.5936	1.7298	-1.7867
LJP008_HEK293_24H:M14	BRD-K79254416	decitabine	HEK293	trt_cp	3.33 uM	24 h	2	52	0.2498	0.115247	1	1	1	1	0	DNA inhibitor	DNMT1|DNMT3A	-0.593	1.7298	-1.7851
CRCGN017_MCF10A.TP53.M_24H:BRD-K38323065:10.9377	BRD-K38323065	phenacetin	MCF10A	trt_cp	10 uM	24 h	3	46	0.12	0.0751277	1	0	1	1	0	Cyclooxygenase inhibitor	PTGS1	-0.5926	1.7298	-1.784
PBIOA021_A375_24H:M14	BRD-K59204667	DBeQ	A375	trt_cp	3.33 uM	24 h	2	103	0.2025	0.146037	1	1	1	1	0	ATPase inhibitor	CASP3	-0.5922	1.7298	-1.7825
CPC018_MCF7_6H:BRD-K44849676-001-05-5:10	BRD-K44849676	capsazepine	MCF7	trt_cp	10 uM	6 h	3	259	0.45	0.345213	1	1	1	1	0	TRPV agonist	TRPV1|TRPV4	-0.5915	1.7298	-1.7805
LJP007_HEK293_24H:E12	BRD-K25340465	OSI-930	HEK293	trt_cp	0.04 uM	24 h	2	96	0.1754	0.131214	1	0	1	1	0	KIT inhibitor|VEGFR inhibitor	KIT|KDR|PDGFB|PDGFRB	-0.5913	1.7298	-1.7798
LJP001_BT20_6H:BRD-K25311561-001-05-7:0.4	BRD-K25311561	KU-55933	BT20	trt_cp	0.37 uM	6 h	4	129	0.29	0.19558	1	1	1	1	0	ATM kinase inhibitor	ATM|PRKDC	-0.5901	1.7298	-1.7763
CPC001_VCAP_24H:E18	BRD-K72024482	MRS-1754	VCAP	trt_cp	10 uM	24 h	5	117	0.1514	0.134582	0	0	1	1	0	Adenosine receptor antagonist	ADORA2B	-0.59	1.7298	-1.7761
CPC014_ASC_24H:BRD-K07736136-001-01-2:10	BRD-K07736136	VX-702	ASC	trt_cp	10 uM	24 h	3	130	0.04	0.0729176	1	0	1	1	0	P38 MAPK inhibitor	MAPK14|MAPK11|MAPK12	-0.59	1.7298	-1.776
CPC004_PC3_6H:BRD-K36055864-001-09-3:10	BRD-K36055864	cycloheximide	PC3	trt_cp	10 uM	6 h	5	448	0.67	0.553996	1	1	1	1	0	Protein synthesis inhibitor	GSK3B|RPL3	-0.5899	1.7298	-1.7756
REP.B027_A375_24H:O23	BRD-A38592941	timonacic	A375	trt_cp	0.03 uM	24 h	2	93	0.2309	0.148178	1	1	1	1	0	Antioxidant	ANXA5	-0.5898	1.7298	-1.7755
CPC010_PC3_24H:BRD-K50938786-003-07-6:10	BRD-K50938786	ropivacaine	PC3	trt_cp	10 uM	24 h	5	149	0.12	0.135212	1	0	1	1	0	Sodium channel inhibitor	SCN9A|SCN10A	-0.5897	1.7298	-1.775
CPC018_PHH_24H:BRD-K96799727-001-01-7:10	BRD-K96799727	pifithrin-mu	PHH	trt_cp	10 uM	24 h	3	121	0.17	0.145027	0	0	1	1	0	p53 inhibitor	HSPA1A|TP53	-0.5895	1.7298	-1.7746
CPD002_PC3_24H:BRD-K17041687-001-01-8:10	BRD-K17041687	diflorasone	PC3	trt_cp	10 uM	24 h	3	114	0.26	0.174088	1	1	1	1	0	Glucocorticoid receptor agonist	NR3C1	-0.5891	1.7298	-1.7733
REP.B013_YAPC_24H:B23	BRD-K37590257	GSK-256066	YAPC	trt_cp	0.03 uM	24 h	2	65	0.2303	0.123718	0	0	1	1	0	Phosphodiesterase inhibitor	PDE4A|PDE4B|PDE4C|PDE4D	-0.589	1.7298	-1.7729
PBIOA017_HT29_24H:C13	BRD-K21733600	rofecoxib	HT29	trt_cp	10 uM	24 h	3	129	0.15	0.14066	0	0	1	1	0	Cyclooxygenase inhibitor	PTGS2|CYP3A4|ELN	-0.5887	1.7298	-1.7722
REP.A012_MDAMB231_24H:C10	BRD-A00546892	biperiden	MDAMB231	trt_cp	0.37 uM	24 h	2	59	0.0647	0.0624754	0	0	1	1	0	Acetylcholine receptor antagonist	CHRM1|CHRM2|CHRM3|CHRM4|CHRM5|CHRNA2	-0.5885	1.7298	-1.7714
LJP001_SKBR3_6H:BRD-K84085265-001-02-1:10	BRD-K84085265	CG-930	SKBR3	trt_cp	10 uM	6 h	4	130	0.3	0.199693	1	1	1	1	0	JNK inhibitor	MAPK8	-0.5867	1.7298	-1.766
CPC018_HEPG2_6H:BRD-K74913225-001-03-3:10	BRD-K74913225	brinzolamide	HEPG2	trt_cp	10 uM	6 h	3	54	0.03	0.0406994	1	0	1	1	0	Carbonic anhydrase inhibitor	CA2|CA7|CA1|CYP2B6|CYP2C8|CA12|CA14|CA4|CA5A	-0.5865	1.7298	-1.7656
PBIOA018_HT29_24H:J23	BRD-K93754473	tamoxifen	HT29	trt_cp	0.125 uM	24 h	2	94	0.1763	0.130173	0	0	1	1	0	Estrogen receptor antagonist|Selective estrogen receptor modulator (SERM)	ESR1|ESR2|CYP3A5|ESRRG|PLD1|PRKCD|PRKCE|PRKCQ|PRKCZ|EBP|GPER1|PRKCA|PRKCB|PRKCG|PRKCI	-0.5862	1.7298	-1.7647
PBIOA021_HEPG2_24H:G02	BRD-A93255169	thalidomide	HEPG2	trt_cp	3.33 uM	24 h	3	130	0.29	0.196337	1	0	1	1	0	TNF inhibitor	TNF|CRBN|CYP1A2|CYP2B6|CYP2C19|CYP3A5|FGFR2|NFKB1|ORM1|ORM2|PTGS2	-0.5856	1.7298	-1.7628
CPD002_MCF7_6H:BRD-K13044802-213-15-7:10	BRD-K13044802	ciclopirox	MCF7	trt_cp	10 uM	6 h	3	375	0.55	0.459227	0	0	1	1	0	Membrane integrity inhibitor	ATP1A1	-0.5855	1.7298	-1.7624
PAC002_U2OS_6H:BRD-K50018155-003-01-3:10	BRD-K50018155	RS-67506	U2OS	trt_cp	10 uM	6 h	2	47	0.23	0.105134	0	0	1	1	0	Serotonin receptor agonist	HTR4	-0.5854	1.7298	-1.7621
LJP009_NPC.TAK_24H:E07	BRD-K01567962	pyrazolanthrone	NPC	trt_cp	10 uM	24 h	3	117	0.2285	0.165336	1	1	1	1	0	JNK inhibitor	MAPK10|MAPK8|MAPK9|TTK|LRRK2|MAPK8IP1	-0.5852	1.7298	-1.7616
REP.A026_MCF10A_24H:I01	BRD-K90948141	indiplon	MCF10A	trt_cp	10 uM	24 h	3	164	0.0842	0.118825	1	0	1	1	0	Benzodiazepine receptor agonist|GABA receptor agonist	GABRA1|GABRA2|GABRA3|GABRA5	-0.5847	1.7298	-1.7601
PBIOA022_HA1E_24H:H18	BRD-K02130563	panobinostat	HA1E	trt_cp	0.04 uM	24 h	3	497	0.75	0.617361	1	1	1	1	0	HDAC inhibitor	HDAC1|HDAC2|HDAC3|HDAC4|HDAC6|HDAC7|HDAC8|HDAC9	-0.5846	1.7298	-1.7597
CPC001_PC3_6H:BRD-K92984783-003-02-4:10	BRD-K92984783	melperone	PC3	trt_cp	10 uM	6 h	4	132	0.22	0.172317	1	0	1	1	0	Dopamine receptor antagonist|Serotonin receptor antagonist	DRD2|HTR1A|HTR2A	-0.5846	1.7298	-1.7596
REP.A004_PC3_24H:H19	BRD-K22822991	odanacatib	PC3	trt_cp	10 uM	24 h	3	104	0.2478	0.16233	1	0	1	1	0	Cathepsin inhibitor	CTSK	-0.5844	1.7298	-1.7591
CPC017_MCF7_6H:BRD-A28318179-003-03-6:10	BRD-A28318179	aminomethyltransferase	MCF7	trt_cp	10 uM	6 h	4	322	0.07	0.151812	1	0	1	1	0	Nitric oxide synthase inhibitor	NOS2	-0.5834	1.7298	-1.756
CPC018_HT29_6H:BRD-K22385716-001-01-7:10	BRD-K22385716	LY-303511	HT29	trt_cp	10 uM	6 h	5	273	0.38	0.325689	1	1	1	1	0	Casein kinase inhibitor|PI3K inhibitor	CSNK2A1|CSNK2A2|CSNK2B|MTOR|BRD2|BRD3|BRD4	-0.5829	1.7298	-1.7546
POL001_MCF7_24H:C08	BRD-K08132273	tyrphostin	MCF7	trt_cp	3.33 uM	24 h	3	87	0.31	0.166062	1	0	1	1	0	EGFR inhibitor	ERBB2	-0.5825	1.7298	-1.7533
CPC006_HA1E_6H:BRD-K88560311-011-02-2:10	BRD-K88560311	rucaparib	HA1E	trt_cp	10 uM	6 h	5	199	0.39	0.281702	1	1	1	1	0	PARP inhibitor	PARP1|PARP2	-0.582	1.7298	-1.7519
CPC004_VCAP_6H:BRD-K02404261-001-07-6:10	BRD-K02404261	caffeine	VCAP	trt_cp	10 uM	6 h	4	116	0.08	0.0974102	1	0	1	1	0	Adenosine receptor antagonist|Phosphodiesterase inhibitor	ADORA1|ADORA2A|ADORA2B|ATM|ITPR1|RYR1|ATR|ADORA3|ITPR2|ITPR3|PDE10A|PDE11A|PDE1A|PDE1B|PDE1C|PDE2A|PDE3A|PDE3B|PDE4A|PDE4B|PDE4C|PDE4D|PDE5A|PDE6A|PDE6B|PDE6C|PDE7A|PDE7B|PDE8A|PDE8B|PDE9A|PIK3CA|PIK3CB|PIK3CD|PRKDC|RYR2|RYR3	-0.5819	1.7298	-1.7516
REP.A022_HEK293_24H:I19	BRD-A72309220	metergoline	HEK293	trt_cp	10 uM	24 h	3	107	0.1489	0.127635	0	0	1	1	0	Dopamine receptor agonist|Serotonin receptor antagonist	HTR2A|DRD2|HTR1A|HTR1B|HTR1D|HTR1E|HTR1F|HTR2B|HTR2C|HTR5A|HTR6|HTR7	-0.5817	1.7298	-1.7509
CPC015_MCF7_24H:BRD-K72726508-001-01-3:10	BRD-K72726508	arcyriaflavin-a	MCF7	trt_cp	10 uM	24 h	5	264	0.35	0.307374	1	1	1	1	0	CDK inhibitor	CCND1|CDK4|CCNE1|CDK2	-0.5815	1.7298	-1.7503
REP.B023_YAPC_24H:M13	BRD-K72029282	probucol	YAPC	trt_cp	2.22 uM	24 h	2	120	0.2832	0.186409	1	1	1	1	0	Atherogenesis inhibitor	ABCA1|ABCB11|CES1	-0.581	1.7298	-1.7491
CPC003_VCAP_24H:BRD-K65285700-001-01-5:10	BRD-K65285700	GP-1a	VCAP	trt_cp	10 uM	24 h	2	72	0.26	0.138351	1	0	1	1	0	Cannabinoid receptor agonist	CNR2	-0.5808	1.7298	-1.7484
REP.B016_MCF7_24H:L14	BRD-K55026842	azacitidine	MCF7	trt_cp	0.74 uM	24 h	2	105	0.3429	0.191871	1	1	1	1	0	DNA methyltransferase inhibitor	DNMT1|DNMT3A	-0.5806	1.7298	-1.7477
REP.A028_YAPC_24H:G20	BRD-K94397152	ribavirin	YAPC	trt_cp	3.33 uM	24 h	2	172	0.3102	0.233569	0	0	1	1	0	Antiviral	IMPDH1|ADK|ENPP1|IMPDH2|NT5C2	-0.5804	1.7298	-1.747
CPC012_HT29_6H:BRD-K48935217-001-01-3:10	BRD-K48935217	epothilone	HT29	trt_cp	10 uM	6 h	5	117	0.11	0.114715	0	0	1	1	0	Tubulin inhibitor	TUBB	-0.5802	1.7298	-1.7465
CPC006_HEPG2_6H:BRD-K74236984-001-01-4:10	BRD-K74236984	UNC-0321	HEPG2	trt_cp	10 uM	6 h	3	123	0.05	0.0792991	1	0	1	1	0	Histone lysine methyltransferase inhibitor	EHMT2	-0.5802	1.7298	-1.7464
CPC016_HEPG2_6H:BRD-K62996583-001-03-8:10	BRD-K62996583	lidoflazine	HEPG2	trt_cp	10 uM	6 h	3	113	0.15	0.131648	1	0	1	1	0	Calcium channel blocker	SCN1A|SCN3A|SLC29A1	-0.58	1.7298	-1.746
CPC003_HCC515_24H:BRD-K88429204-001-18-7:10	BRD-K88429204	pyrimethamine	HCC515	trt_cp	10 uM	24 h	3	200	0.25	0.226108	1	1	1	1	0	Dihydrofolate reductase inhibitor	DHFRP1|HEXA|STAT3|DHFR|SLC47A1	-0.5795	1.7298	-1.7445
REP.A013_HEK293_24H:H18	BRD-K40738845	BMS-777607	HEK293	trt_cp	0.04 uM	24 h	3	188	0.1597	0.175211	0	0	1	1	0	AXL kinase inhibitor|FLT3 inhibitor|HGF receptor inhibitor|Macrophage inhibitor|MET inhibitor|Tyrosine kinase inhibitor	MET|AXL|MERTK|MST1R|TYRO3|FLT3	-0.5792	1.7298	-1.7435
REP.B027_HEK293_24H:L24	BRD-K99504665	goserelin-acetate	HEK293	trt_cp	0.01 uM	24 h	2	99	0.187	0.137584	1	0	1	1	0	Gonadotropin receptor agonist	GNRHR|GNRH1|LHCGR	-0.5792	1.7298	-1.7435
REP.B008_MCF10A_24H:K14	BRD-K03353589	ecabet	MCF10A	trt_cp	0.74 uM	24 h	2	195	0.3756	0.27366	0	0	1	1	0	Gastrin inhibitor|Urease inhibitor	CCKBR|GAST|NOXO1	-0.5791	1.7298	-1.7431
CPC004_PC3_6H:BRD-A09056319-001-05-5:10	BRD-A09056319	alfuzosin	PC3	trt_cp	10 uM	6 h	5	73	0.14	0.102225	1	0	1	1	0	Adrenergic receptor antagonist	ADRA1A|ADRA1D|ADRA1B|KCNH2	-0.579	1.7298	-1.7428
CPC005_A375_24H:BRD-K63630713-001-15-9:10	BRD-K63630713	etacrynic-acid	A375	trt_cp	10 uM	24 h	3	165	0.36	0.246447	1	1	1	1	0	Sodium channel inhibitor	SLC12A1|SLC12A2|ATP1A1	-0.578	1.7298	-1.74
CPC005_A549_6H:BRD-K26979635-001-01-1:10	BRD-K26979635	NS-3694	A549	trt_cp	10 uM	6 h	3	143	0.47	0.262149	1	1	1	1	0	Glutamate receptor antagonist	CASP9	-0.5778	1.7298	-1.7393
CPC016_MCF7_24H:BRD-K34995470-001-02-3:10	BRD-K34995470	SU-1498	MCF7	trt_cp	10 uM	24 h	4	169	0.18	0.176364	1	0	1	1	0	VEGFR inhibitor	ERBB2	-0.5777	1.7298	-1.739
CPC016_NEU_24H:BRD-K91699951-001-03-7:10	BRD-K91699951	benzonatate	NEU	trt_cp	10 uM	24 h	3	221	0.16	0.190146	0	0	1	1	0	Anesthetic - local	SCN5A	-0.5775	1.7298	-1.7385
REP.B021_MDAMB231_24H:I13	BRD-K83963101	MLN-8054	MDAMB231	trt_cp	2.22 uM	24 h	2	138	0.3539	0.223465	0	0	1	1	0	Aurora kinase inhibitor|Protein kinase inhibitor|Tubulin inhibitor	AURKA	-0.5774	1.7298	-1.7382
CPC018_SKB_24H:BRD-K00610438-003-01-7:10	BRD-K00610438	altanserin	SKB	trt_cp	10 uM	24 h	3	156	0.44	0.264923	1	0	1	1	0	Serotonin receptor antagonist	HTR2A|HTR2C	-0.5773	1.7298	-1.7379
REP.B005_YAPC_24H:H07	BRD-K09372874	merimepodib	YAPC	trt_cp	2.22 uM	24 h	2	274	0.432	0.347895	1	1	1	1	0	Inosine monophosphate dehydrogenase inhibitor	IMPDH1	-0.5773	1.7298	-1.7378
CPC004_PC3_6H:BRD-A02180903-001-03-7:10	BRD-A02180903	betamethasone	PC3	trt_cp	10 uM	6 h	4	160	0.19	0.176306	1	0	1	1	0	Glucocorticoid receptor agonist	NR3C1	-0.5768	1.7298	-1.7364
LJP006_PC3_24H:B07	BRD-K23984367	sorafenib	PC3	trt_cp	10 uM	24 h	3	289	0.53	0.395747	1	1	1	1	0	RAF inhibitor|FLT3 inhibitor|KIT inhibitor|PDGFR inhibitor|RET inhibitor|VEGFR inhibitor	RET|BRAF|FLT3|KDR|RAF1|FLT1|FLT4|KIT|DDR2|PDGFRB|FGFR1|CYP2B6|CYP2C8|CYP3A5|PDGFB|SLCO1B3	-0.5766	1.7298	-1.7355
EMU001_THP1_3H:A24	BRD-K61567297	resatorvid	THP1	trt_cp	0.01 uM	3 h	3	140	0.2828	0.201203	0	0	1	1	0	TLR antagonist	TLR4	-0.5761	1.7298	-1.7341
ERG020_VCAP_24H:BRD-K09991945:12.7	BRD-K09991945	BRD-K09991945	VCAP	trt_cp	12.5 uM	24 h	3	220	0.41	0.303692	1	1	1	1	0	PKC inhibitor	GSK3B	-0.576	1.7298	-1.7339
CPC016_MCF7_24H:BRD-K84266862-001-01-6:10	BRD-K84266862	BRL-50481	MCF7	trt_cp	10 uM	24 h	4	187	0.26	0.222966	1	0	1	1	0	Phosphodiesterase inhibitor	PDE7A|PDE7B	-0.5754	1.7298	-1.7321
CPC017_ASC_24H:BRD-K02283807-003-01-4:10	BRD-K02283807	GR-32191	ASC	trt_cp	10 uM	24 h	4	84	0.17	0.120836	1	0	1	1	0	Thromboxane receptor antagonist	TBXA2R	-0.5751	1.7298	-1.731
CPC002_HCC515_24H:BRD-K46142322-003-01-6:10	BRD-K46142322	RS-67333	HCC515	trt_cp	10 uM	24 h	3	93	0.16	0.123348	1	0	1	1	0	Serotonin receptor agonist	HTR4	-0.575	1.7298	-1.7308
CPC006_HEPG2_6H:BRD-K55966568-001-01-3:6	BRD-K55966568	orantinib	HEPG2	trt_cp	6.66 uM	6 h	3	123	0.32	0.200613	1	1	1	1	0	PDGFR inhibitor|FGFR inhibitor|VEGFR inhibitor	KDR|PDGFRB|FGFR1|AURKA|AURKB|PDGFRA|TBK1|EGFR|FGFR2	-0.5744	1.7298	-1.729
LJP009_HME1_24H:B03	BRD-A79768653	sirolimus	HME1	trt_cp	10 uM	24 h	3	320	0.4414	0.380033	1	1	1	1	0	MTOR inhibitor	MTOR|FKBP1A|CCR5|FGF2	-0.5744	1.7298	-1.729
REP.A020_HT29_24H:B15	BRD-K83186168	AZD-1981	HT29	trt_cp	1.11 uM	24 h	3	111	0.2778	0.177565	1	1	1	1	0	CRTH receptor antagonist	PTGDR2	-0.5743	1.7298	-1.7288
REP.B020_HA1E_24H:H20	BRD-K82928847	ACY-1215	HA1E	trt_cp	0.74 uM	24 h	2	185	0.4884	0.303951	1	1	1	1	0	HDAC inhibitor	HDAC6|HDAC1|HDAC2|HDAC3|HDAC8	-0.5743	1.7298	-1.7286
REP.B019_HELA_24H:K14	BRD-K49215523	GSK-2636771	HELA	trt_cp	0.74 uM	24 h	2	121	0.3612	0.211396	1	0	1	1	0	PI3K inhibitor	PIK3CB	-0.574	1.7298	-1.7279
CPC014_SKB_24H:BRD-K91900765-001-01-9:10	BRD-K91900765	VX-745	SKB	trt_cp	10 uM	24 h	4	132	0.21	0.168355	0	0	1	1	0	P38 MAPK inhibitor	MAPK14|MAPK11|MAPK12	-0.5736	1.7298	-1.7266
CPC017_SKB_24H:BRD-A44133049-001-01-5:10	BRD-A44133049	azasetron	SKB	trt_cp	10 uM	24 h	2	150	0.48	0.271329	0	0	1	1	0	Serotonin receptor antagonist	HTR3A|HTR3B	-0.5736	1.7298	-1.7265
LJP009_JURKAT_24H:E15	BRD-K02123250	JNJ-38877605	JURKAT	trt_cp	1.11 uM	24 h	3	76	0.1394	0.10408	0	0	1	1	0	MET inhibitor	MET	-0.5734	1.7298	-1.726
CPC006_HEPG2_6H:BRD-K06890060-001-05-9:40	BRD-K06890060	alda-1	HEPG2	trt_cp	40 uM	6 h	3	79	0.24	0.139235	1	0	1	1	0	Aldehyde dehydrogenase activator	ALDH2	-0.5731	1.7298	-1.7251
PBIOA013_PC3_24H:O07	BRD-K37798499	etoposide	PC3	trt_cp	10 uM	24 h	3	317	0.51	0.406579	1	1	1	1	0	Topoisomerase inhibitor	TOP2A|TOP2B|CYP2E1|CYP3A5	-0.5729	1.7298	-1.7247
REP.A020_MCF10A_24H:G19	BRD-K82236179	dicoumarol	MCF10A	trt_cp	10 uM	24 h	3	318	0.4719	0.391714	0	0	1	1	0	NADPH inhibitor	VKORC1|NQO1|CRYZ	-0.5727	1.7298	-1.724
CPC018_PHH_24H:BRD-K59037100-001-09-7:10	BRD-K59037100	oxybenzone	PHH	trt_cp	10 uM	24 h	3	123	0.17	0.14622	0	0	1	1	0	Lipase inhibitor	LIPE	-0.5727	1.7298	-1.7239
LJP009_HEK293_24H:N07	BRD-K16730910	regorafenib	HEK293	trt_cp	10 uM	24 h	3	166	0.3426	0.241145	1	1	1	1	0	FGFR inhibitor|KIT inhibitor|PDGFR inhibitor|RAF inhibitor|RET inhibitor|VEGFR inhibitor	KDR|KIT|RET|FLT1|FLT4|PDGFRA|TEK|BRAF|ABL1|DDR2|FGFR1|FGFR2|FRK|MAPK11|PDGFRB|RAF1|CYP2B6|CYP2C19|CYP2C8|FGF2|EPHA2|NTRK1	-0.5725	1.7298	-1.7233
REP.B017_YAPC_24H:H08	BRD-K63630713	etacrynic-acid	YAPC	trt_cp	0.74 uM	24 h	2	67	0.1503	0.101472	1	0	1	1	0	Sodium channel inhibitor	SLC12A1|SLC12A2|ATP1A1	-0.5725	1.7298	-1.7232
REP.A021_HA1E_24H:F19	BRD-K82467063	SB-271046	HA1E	trt_cp	10 uM	24 h	3	191	0.3315	0.254442	1	1	1	1	0	Serotonin receptor antagonist	HTR6	-0.5723	1.7298	-1.7229
CVD001_PHH_24H:BRD-K60476892-001-02-1:16.4289	BRD-K60476892	YC-1	PHH	trt_cp	15 uM	24 h	3	170	0.37	0.253604	0	0	1	1	0	Guanylyl cyclase activator	HIF1A|GUCY1A2|GUCY1A3|GUCY1B3	-0.5719	1.7298	-1.7214
REP.B014_A375_24H:B07	BRD-A55962179	omeprazole	A375	trt_cp	2.22 uM	24 h	2	92	0.2474	0.152554	1	1	1	1	0	Proton pump inhibitor	ATP4A|CYP1A2|CYP2C19|CLCN2	-0.5712	1.7298	-1.7193
CPC002_HA1E_6H:BRD-K52459643-001-10-2:10	BRD-K52459643	alprostadil	HA1E	trt_cp	10 uM	6 h	3	68	0.29	0.141999	1	1	1	1	0	Prostanoid receptor agonist	PTGER1|PTGER2|CATSPER1|CATSPER2|CATSPER3|CATSPER4|PTGDR|PTGER4|PTGIR	-0.5709	1.7298	-1.7185
LJP001_BT20_6H:BRD-K92428232-001-03-1:10	BRD-K92428232	GSK-461364	BT20	trt_cp	10 uM	6 h	4	207	0.33	0.264285	1	1	1	1	0	PLK inhibitor	PLK1	-0.5707	1.7298	-1.718
REP.B004_HT29_24H:P11	BRD-A26423207	sparfloxacin	HT29	trt_cp	0.03 uM	24 h	2	117	0.1335	0.126376	0	0	1	1	0	Bacterial DNA Gyrase inhibitor	TOP2A	-0.5702	1.7298	-1.7164
REP.A027_A375_24H:H19	BRD-K97101532	VX-661	A375	trt_cp	10 uM	24 h	3	203	0.2192	0.213304	0	0	1	1	0	CFTR channel agonist	CFTR	-0.57	1.7298	-1.7157
REP.B024_MCF7_24H:E14	BRD-K75037734	carbachol	MCF7	trt_cp	0.74 uM	24 h	2	150	0.1305	0.141476	0	0	1	1	0	Cholinergic receptor agonist	CHRM1|CHRM2|CHRNA2|CHRM3|CHRM4|CHRM5	-0.5695	1.7298	-1.7144
REP.A016_JURKAT_24H:I11	BRD-K53963539	vortioxetine	JURKAT	trt_cp	0.125 uM	24 h	2	100	0.3274	0.182966	1	1	1	1	0	Serotonin receptor agonist|Serotonin receptor antagonist	HTR1A|HTR1B|HTR7|SLC6A4|HTR1D|CYP2B6|CYP2C19|CYP2C8|CYP3A5|HTR2A|HTR2C|HTR3A|HTR5A|HTR6	-0.5694	1.7298	-1.714
CPC006_A375_6H:P23	BRD-K89391146	RG-108	A375	trt_cp	80 uM	6 h	5	164	0.2525	0.205771	1	1	1	1	0	DNA inhibitor	DNMT1|DNMT3B	-0.5692	1.7298	-1.7135
REP.B002_A375_24H:L21	BRD-K17743125	belinostat	A375	trt_cp	0.25 uM	24 h	3	247	0.5053	0.357235	1	1	1	1	0	HDAC inhibitor	HDAC1|HDAC2|HDAC3|HDAC4|HDAC5|HDAC6|HDAC7|HDAC8|HDAC9|HDAC10|HDAC11	-0.5692	1.7298	-1.7133
CPC004_MCF7_6H:BRD-K36055864-001-09-3:10	BRD-K36055864	cycloheximide	MCF7	trt_cp	10 uM	6 h	4	455	0.59	0.523917	1	1	1	1	0	Protein synthesis inhibitor	GSK3B|RPL3	-0.5691	1.7298	-1.7131
REP.A012_THP1_24H:G05	BRD-K01577834	adenosine	THP1	trt_cp	0.125 uM	24 h	3	133	0.1494	0.142538	1	0	1	1	0	Adenosine receptor agonist	ADORA1|ADORA2A|ADORA2B|ADORA3|PI4K2A|PI4K2B|TRPM4	-0.5687	1.7298	-1.7119
REP.B009_HEK293_24H:F01	BRD-A29520968	acifran	HEK293	trt_cp	2.22 uM	24 h	2	196	0.3887	0.279104	1	1	1	1	0	Cholesterol inhibitor	HCAR2|HCAR3	-0.5686	1.7298	-1.7117
CPC015_A375_6H:BRD-A58048407-001-09-7:10	BRD-A58048407	nimodipine	A375	trt_cp	10 uM	6 h	3	133	0.25	0.184385	1	1	1	1	0	Calcium channel blocker	CACNA1C|NR3C2|CACNA1D|CACNA1F|CACNA1S|AHR|CACNB1|CACNB2|CACNB3|CACNB4|CFTR	-0.5684	1.7298	-1.711
REP.A015_A549_24H:K02	BRD-K59273480	propentofylline	A549	trt_cp	3.33 uM	24 h	3	172	0.1749	0.175384	0	0	1	1	0	Adenosine receptor antagonist|Phosphodiesterase inhibitor	ACHE|PDE1A	-0.5683	1.7298	-1.7108
PAC004_U2OS_6H:BRD-K09537769-001-01-6:10	BRD-K09537769	NU-7026	U2OS	trt_cp	10 uM	6 h	2	74	0.18	0.116703	1	1	1	1	0	DNA inhibitor|MTOR inhibitor|PI3K inhibitor	PRKDC	-0.5683	1.7298	-1.7107
REP.B005_HELA_3H:M13	BRD-K11071038	ICI-162846	HELA	trt_cp	2.22 uM	3 h	3	122	0.3263	0.201753	1	1	1	1	0	Histamine receptor antagonist	HRH2	-0.5683	1.7298	-1.7106
CPC016_A375_6H:BRD-K98521173-001-03-8:10	BRD-K98521173	desoxycortone	A375	trt_cp	10 uM	6 h	5	280	0.19	0.233231	1	0	1	1	0	Mineralocorticoid receptor agonist	NR3C2|NR3C1	-0.5682	1.7298	-1.7104
CPC017_HEPG2_6H:BRD-K26521938-001-04-9:10	BRD-K26521938	dinoprostone	HEPG2	trt_cp	10 uM	6 h	3	90	0.11	0.100612	1	0	1	1	0	Prostanoid receptor agonist	PTGER2|PTGER1|PTGER3|PTGER4|CATSPER1|CATSPER2|CATSPER3|CATSPER4|PTGDR|PTGDR2|PTGFR|TBXA2R	-0.5679	1.7298	-1.7095
REP.B022_MCF10A_24H:N10	BRD-K71035033	masitinib	MCF10A	trt_cp	0.08 uM	24 h	2	128	0.2198	0.169609	0	0	1	1	0	KIT inhibitor|PDGFR inhibitor|Src inhibitor	KIT|FGFR3|LYN|PDGFRB|PDGFRA	-0.5679	1.7298	-1.7095
MOAR005_PC3_24H:A22	BRD-K84663978	trequinsin	PC3	trt_cp	10 uM	24 h	3	178	0.41	0.27317	1	1	1	1	0	Phosphodiesterase inhibitor	PDE4A|PDE4B|PDE4C|PDE4D|PTGIR|PDE5A	-0.5678	1.7298	-1.7092
REP.B006_A375_24H:D09	BRD-K19456237	piracetam	A375	trt_cp	0.25 uM	24 h	2	78	0.1946	0.12458	0	0	1	1	0	Acetylcholine receptor agonist	GRIA1|GRIA2|GRIA3|GRIA4	-0.5676	1.7298	-1.7085
REP.A002_HELA_3H:D13	BRD-K16195444	oxymetazoline	HELA	trt_cp	10 uM	3 h	3	128	0.2945	0.196326	1	1	1	1	0	Adrenergic receptor agonist	ADRA1A|ADRA2A|ADRA1B|ADRA1D|ADRA2B|ADRA2C|CYP2C19|HTR1B|HTR1D|HTR2C	-0.5674	1.7298	-1.7079
MUC.CP008_P1A82_24H:H04	BRD-K43471985	OTX-015	P1A82	trt_cp	0.37 uM	24 h	3	491	0.8	0.633748	1	1	1	1	0	Bromodomain inhibitor	BRD2|BRD3|BRD4|SELE|VCAM1	-0.5673	1.7298	-1.7078
CPC006_AGS_6H:BRD-K88560311-011-02-2:10	BRD-K88560311	rucaparib	AGS	trt_cp	10 uM	6 h	2	109	0.39	0.208486	1	1	1	1	0	PARP inhibitor	PARP1|PARP2	-0.5672	1.7298	-1.7075
LIVB001_HUH7_72H:G19	BRD-K35586044	yohimbine	HUH7	trt_cp	10 uM	72 h	3	76	0.13	0.10051	0	0	1	1	0	Adrenergic receptor antagonist	ADRA2A|ADRA2C|ADRA2B|HTR1A|HTR1B|HTR1D|HTR2B|DRD2|DRD3|HTR1E|HTR1F|HTR2A|HTR2C|HTR5A|HTR7|KCNJ1|KCNJ10|KCNJ11|KCNJ12|KCNJ14|KCNJ15|KCNJ8	-0.5672	1.7298	-1.7073
REP.B025_HT29_24H:H19	BRD-A74391928	ibutilide	HT29	trt_cp	2.22 uM	24 h	2	178	0.3338	0.246481	1	1	1	1	0	Potassium channel antagonist	KCNH2|CACNA1C|SCN5A|CACNA2D1|CACNB1|CACNG1|KCNH6|KCNH7|KCNJ11|KCNK1|KCNK6	-0.567	1.7298	-1.7068
MOAR002_A375_24H:A20	BRD-K17894950	indirubin	A375	trt_cp	3.33 uM	24 h	3	165	0.38	0.2532	1	1	1	1	0	CDK inhibitor|GSK inhibitor	CDK1|CDK5|CDK2|CDK4|GSK3B|GSK3A	-0.5667	1.7286	-1.7059
REP.B004_HA1E_24H:F15	BRD-K21396683	marimastat	HA1E	trt_cp	0.25 uM	24 h	3	98	0.3128	0.177042	1	0	1	1	0	Matrix metalloprotease inhibitor	MMP1|MMP2|MMP7|MMP10|MMP11|MMP12|MMP13|MMP14|MMP15|MMP16|MMP17|MMP19|MMP20|MMP21|MMP23A|MMP24|MMP25|MMP26|MMP27|MMP28|MMP3|MMP8|MMP9	-0.5667	1.7286	-1.7059
CPC017_MCF7_6H:BRD-K52620403-015-02-6:10	BRD-K52620403	STO-609	MCF7	trt_cp	10 uM	6 h	4	143	0.2	0.171007	1	1	1	1	0	Calmodulin inhibitor	CAMKK1|CAMKK2	-0.5667	1.7286	-1.7059
REP.B028_A375_24H:K01	BRD-K95901403	XL-147	A375	trt_cp	2.22 uM	24 h	2	180	0.3924	0.268739	1	1	1	1	0	PI3K inhibitor	PIK3CG|PIK3CA|PIK3CD	-0.5667	1.7286	-1.7058
REP.B023_HELA_24H:F19	BRD-K69122748	diacerein	HELA	trt_cp	2.22 uM	24 h	2	170	0.4574	0.28197	1	1	1	1	0	Interleukin inhibitor	IL1B	-0.5665	1.7282	-1.7053
CPC020_MCF7_6H:BRD-K48970916-001-11-3:10	BRD-K48970916	danazol	MCF7	trt_cp	10 uM	6 h	4	254	0.27	0.264807	1	1	1	1	0	Estrogen receptor antagonist|Progesterone receptor agonist	GNRHR|ESR1|CYP2C8|TNF|AR|CCL2|GNRHR2|PGR	-0.5665	1.7281	-1.7052
LJP001_SKBR3_6H:BRD-A79768653-001-05-4:0.4	BRD-A79768653	sirolimus	SKBR3	trt_cp	0.37 uM	6 h	3	152	0.37	0.239802	1	1	1	1	0	MTOR inhibitor	MTOR|FKBP1A|CCR5|FGF2	-0.5663	1.7273	-1.7048
PBIOA018_A549_24H:N03	BRD-K42191735	buparlisib	A549	trt_cp	1.11 uM	24 h	3	170	0.3	0.228358	1	1	1	1	0	PI3K inhibitor	PIK3CA|PIK3CG	-0.5661	1.7253	-1.7041
CPC016_NEU_24H:BRD-K77771411-003-03-2:10	BRD-K77771411	moxonidine	NEU	trt_cp	10 uM	24 h	3	80	0.13	0.103121	0	0	1	1	0	Imidazoline receptor agonist	NISCH|ADRA2A|ADRA2B|ADRA2C	-0.5661	1.7253	-1.7041
REP.B027_JURKAT_24H:P07	BRD-K97963946	EMD-1214063	JURKAT	trt_cp	2.22 uM	24 h	2	126	0.2111	0.164915	0	0	1	1	0	HGF receptor inhibitor	MET	-0.566	1.7245	-1.7038
REP.A012_MCF10A_24H:D11	BRD-K00603606	ticlopidine	MCF10A	trt_cp	0.125 uM	24 h	3	94	0.158	0.123232	1	0	1	1	0	Purinergic receptor antagonist	P2RY12|CYP2B6|CYP2C19	-0.5657	1.7215	-1.703
MOAR003_PC3_24H:I17	BRD-K22127577	crenolanib	PC3	trt_cp	3.33 uM	24 h	2	250	0.4769	0.349152	1	1	1	1	0	PDGFR inhibitor	PDGFRB|PDGFRA|CSF1R|FLT3|KIT	-0.5657	1.721	-1.7029
CPC006_NCIH596_6H:BRD-K92991072-001-02-3:10	BRD-K92991072	PAC-1	NCIH596	trt_cp	10 uM	6 h	2	125	0.24	0.175142	1	1	1	1	0	Caspase activator	CASP3	-0.5654	1.717	-1.7021
REP.B015_HA1E_24H:E12	BRD-K56844688	epirubicin	HA1E	trt_cp	0.01 uM	24 h	2	185	0.4117	0.279066	1	1	1	1	0	Topoisomerase inhibitor	TOP2A|CHD1	-0.5652	1.712	-1.7012
REP.B021_HT29_24H:B19	BRD-K80608265	erteberel	HT29	trt_cp	2.22 uM	24 h	2	84	0.2248	0.138953	1	1	1	1	0	Estrogen receptor agonist	ESR2|ESR1	-0.5651	1.7111	-1.7011
REP.A002_A549_24H:H13	BRD-K16803204	filgotinib	A549	trt_cp	10 uM	24 h	3	154	0.3127	0.221899	0	0	1	1	0	JAK inhibitor	JAK1|JAK2|JAK3|TYK2	-0.565	1.7083	-1.7006
CPC001_HA1E_24H:BRD-K26015241-001-01-0:10	BRD-K26015241	ODQ	HA1E	trt_cp	10 uM	24 h	3	155	0.38	0.245408	1	1	1	1	0	Guanylyl cyclase inhibitor	GUCY1A2|GUCY1A3|GUCY1B3	-0.5648	1.7056	-1.7002
CPC018_NPC_24H:BRD-K96354014-001-10-4:10	BRD-K96354014	nifedipine	NPC	trt_cp	10 uM	24 h	3	116	0.25	0.172199	0	0	1	1	0	Calcium channel blocker	CACNA1C|CACNA1D|CACNA1S|CACNA1F|CACNA2D1|CYP3A5|CACNA1H|CACNB2|CALM1|GLRA1|GLRA3|GLRB|KCNA1|KCNA5|NR1I2|TRPM3	-0.5647	1.7039	-1.7
LUNG001_A549_24H:BRD-A45664787:10	BRD-A45664787	iloprost	A549	trt_cp	10 uM	24 h	2	94	0.3422	0.181357	1	1	1	1	0	Platelet aggregation inhibitor|Prostanoid receptor agonist	PTGIR|PTGER1|PTGER2|PDE4A|PDE4B|PDE4C|PDE4D|PLAT|PTGDR|PTGER3|PTGER4|PTGFR|TBXA2R	-0.5641	1.6871	-1.698
CPC002_PC3_24H:BRD-K40578143-001-01-8:10	BRD-K40578143	GR-79236	PC3	trt_cp	10 uM	24 h	5	159	0.21	0.184773	1	1	1	1	0	Adenosine receptor agonist	ADORA1|ADORA2A	-0.5641	1.6868	-1.6979
LIVB002_HUH7_72H:K18	BRD-K34776109	glimepiride	HUH7	trt_cp	6.66 uM	72 h	3	131	0.25	0.182994	0	0	1	1	0	Insulin secretagogue	ABCC8|KCNJ11|KCNJ1	-0.5638	1.68	-1.6972
REP.B022_HELA_24H:D07	BRD-K68232413	etizolam	HELA	trt_cp	2.22 uM	24 h	2	73	0.3427	0.159937	1	1	1	1	0	Benzodiazepine receptor agonist	GABRA1|GABRA2|GABRA3|GABRA5|PTAFR	-0.5638	1.68	-1.6972
CPC016_SKB_24H:BRD-K53523901-001-02-8:10	BRD-K53523901	arctigenin	SKB	trt_cp	10 uM	24 h	3	176	0.26	0.216308	1	0	1	1	0	MEK inhibitor	ADIPOR1|AHR|CHUK|MAP2K1	-0.5637	1.6777	-1.6969
REP.A012_JURKAT_24H:F14	BRD-K01039503	sofalcone	JURKAT	trt_cp	3.33 uM	24 h	3	64	0.1317	0.0928354	1	0	1	1	0	Mucus protecting agent	HPGD|CBR1	-0.5637	1.6764	-1.6968
EMU001_K562_24H:K19	BRD-K08109215	I-BET-762	K562	trt_cp	10 uM	24 h	3	577	0.8123	0.692272	1	1	1	1	0	Bromodomain inhibitor	BRD2|BRD3|BRD4|APOA1	-0.5636	1.6747	-1.6966
REP.A020_HEK293_24H:H01	BRD-A84481105	thioridazine	HEK293	trt_cp	10 uM	24 h	2	146	0.2021	0.173696	0	0	1	1	0	Dopamine receptor antagonist	DRD2|HTR2A|DRD1|HTR2C|CHRNA7|MALT1|ADRA1A|ADRA1B|DRD3|DRD4|DRD5|HRH1|HTR1A|HTR6|HTR7|KCNH2	-0.5635	1.6701	-1.6962
ISO002_MCF10A.BRCA1.HD_24H:H07	BRD-K69023402	thapsigargin	MCF10A	trt_cp	10 uM	24 h	3	81	0.3625	0.173271	1	1	1	1	0	ATPase inhibitor	ATP2A1	-0.5634	1.6666	-1.6959
REP.B013_HEK293_24H:P24	BRD-K44353683	nateglinide	HEK293	trt_cp	0.01 uM	24 h	2	99	0.2151	0.14756	1	1	1	1	0	Insulin secretagogue	ABCC8|KCNJ11|CYP3A4|INS|KCNJ10|PPARG	-0.5631	1.6584	-1.6951
NMH002_NEU_6H:BRD-A93000692-001-06-5:10	BRD-A93000692	ciglitazone	NEU	trt_cp	10 uM	6 h	3	110	0.38	0.206737	0	0	1	1	0	PPAR receptor agonist	PPARG|INS	-0.5628	1.6415	-1.6942
CPC014_HT29_6H:BRD-K09186807-001-01-6:10	BRD-K09186807	KIN001-244	HT29	trt_cp	10 uM	6 h	5	263	0.3	0.284033	1	1	1	1	0	PDK1 Inhibitor	PDPK1	-0.5627	1.6309	-1.6938
REP.B008_HT29_24H:G19	BRD-K82164249	andarine	HT29	trt_cp	2.22 uM	24 h	2	143	0.2908	0.206203	0	0	1	1	0	Androgen receptor antagonist	AR	-0.5626	1.6217	-1.6935
PBIOA015_MCF7_24H:E13	BRD-K54330070	SB-202190	MCF7	trt_cp	10 uM	24 h	3	213	0.37	0.283871	1	1	1	1	0	P38 MAPK inhibitor	MAPK14|AKT1|ALOX5|CHEK1|GSK3B|LCK|MAPK1|MAPK11|MAPK12|MAPK8|PRKCA|ROCK1|RPS6KB1|SGK1	-0.5625	1.6147	-1.6933
MOAR005_A375_24H:K23	BRD-K43621685	CP-673451	A375	trt_cp	3.33 uM	24 h	3	214	0.59	0.359305	1	1	1	1	0	PDGFR inhibitor	PDGFRB|KIT|PDGFRA	-0.5625	1.6153	-1.6933
REP.A003_YAPC_24H:J07	BRD-K33882852	ZK-93423	YAPC	trt_cp	10 uM	24 h	3	186	0.3604	0.261806	0	0	1	1	0	Benzodiazepine receptor agonist	GABRA1|GABRA2|GABRA3|GABRA5|GABRB2|GABRG2	-0.5622	1.59	-1.6924
REP.A022_YAPC_24H:J11	BRD-K72215350	acexamic-acid	YAPC	trt_cp	0.125 uM	24 h	2	111	0.2619	0.172409	1	0	1	1	0	Gastrin inhibitor|5-alpha reductase inhibitor|Reducing agent	GAST|SRD5A1	-0.5619	1.5728	-1.6914
CPC005_A375_24H:BRD-A92439610-001-03-2:10	BRD-A92439610	BRD-A92439610	A375	trt_cp	10 uM	24 h	3	130	0.3	0.199693	1	1	1	1	0	Immunosuppressant|Corticosteroid agonist|Glucocorticoid receptor agonist	NR3C1|CYP3A5|CYP3A7	-0.5617	1.5662	-1.6908
CPC005_A549_6H:BRD-A74975734-004-02-4:10	BRD-A74975734	homatropine	A549	trt_cp	10 uM	6 h	3	108	0.34	0.193768	1	1	1	1	0	Acetylcholine receptor antagonist	CES1|CHRM1	-0.5617	1.5657	-1.6907
REP.B027_PC3_24H:E17	BRD-K94436377	diosmin	PC3	trt_cp	0.03 uM	24 h	2	83	0.2037	0.131482	1	1	1	1	0	Aryl hydrocarbon receptor agonist|Capillary stabilizing agent	AHR	-0.5616	1.5647	-1.6905
CPC017_A549_24H:BRD-K64157027-003-01-9:10	BRD-K64157027	ZD-2079	A549	trt_cp	10 uM	24 h	3	107	0.19	0.144178	1	0	1	1	0	Adrenergic receptor agonist	ADRB3	-0.5615	1.5633	-1.6903
LJP001_SKBR3_24H:I09	BRD-K16478699	PLX-4720	SKBR3	trt_cp	10 uM	24 h	4	134	0.3122	0.206823	1	1	1	1	0	RAF inhibitor	BRAF|KDR	-0.5615	1.5634	-1.6903
REP.A003_PC3_24H:I19	BRD-K34022604	clofarabine	PC3	trt_cp	10 uM	24 h	3	373	0.6263	0.488738	1	1	1	1	0	Ribonucleoside reductase inhibitor	RRM1|POLA1|RRM2|SLC22A8|POLD1|POLE|RRM2B	-0.5614	1.5605	-1.6899
CPC005_A375_6H:BRD-K47936004-003-04-9:10	BRD-K47936004	piribedil	A375	trt_cp	10 uM	6 h	3	139	0.4	0.238434	1	1	1	1	0	Dopamine receptor agonist	DRD2|DRD3|ADRA2A|ADRA1A|ADRA2C|DRD4|HTR1A|HTR2B	-0.5613	1.5596	-1.6897
LPROT001_A375_6H:BRD-K57754230:6	BRD-K57754230	EPZ-005687	A375	trt_cp	6.66 uM	6 h	3	111	0.13	0.121469	1	0	1	1	0	Histone lysine methyltransferase inhibitor	EZH2	-0.5612	1.5584	-1.6894
CPC004_HEPG2_6H:BRD-A92826379-009-03-4:10	BRD-A92826379	lupanine	HEPG2	trt_cp	10 uM	6 h	3	616	0.53	0.577775	1	0	1	1	0	Sodium channel inhibitor	INS	-0.5611	1.5576	-1.6892
CPC002_HA1E_24H:BRD-K22385716-001-01-7:10	BRD-K22385716	LY-303511	HA1E	trt_cp	10 uM	24 h	3	149	0.32	0.2208	1	1	1	1	0	Casein kinase inhibitor|PI3K inhibitor	CSNK2A1|CSNK2A2|CSNK2B|MTOR|BRD2|BRD3|BRD4	-0.5608	1.5549	-1.688
CPC004_PC3_6H:BRD-K80431395-001-02-4:10	BRD-K80431395	triciribine	PC3	trt_cp	10 uM	6 h	4	461	0.65	0.553526	1	1	1	1	0	AKT inhibitor	AKT1|AKT2|AKT3	-0.5607	1.554	-1.6878
REP.B025_MCF7_24H:H03	BRD-K99113996	AZD-2014	MCF7	trt_cp	0.25 uM	24 h	2	274	0.557	0.395033	0	0	1	1	0	MTOR inhibitor	MTOR	-0.5606	1.5538	-1.6876
CPC003_HCC515_6H:BRD-K31633810-003-01-0:10	BRD-K31633810	DAU-5884	HCC515	trt_cp	10 uM	6 h	3	273	0.13	0.190495	1	0	1	1	0	Acetylcholine receptor antagonist	CHRM3|CHRM1	-0.5603	1.551	-1.6867
POL001_JURKAT_24H:L05	BRD-K43389698	BMS-387032	JURKAT	trt_cp	0.125 uM	24 h	3	147	0.38	0.238991	1	1	1	1	0	CDK inhibitor|Cell cycle inhibitor|MCL1 inhibitor	CDK2|CDK7|CDK9|MCL1	-0.5601	1.5471	-1.686
PBIOA019_PC3_24H:M13	BRD-K93176058	AC-55649	PC3	trt_cp	10 uM	24 h	3	103	0.18	0.137685	1	1	1	1	0	Retinoid receptor agonist	RARB|RARA	-0.5599	1.5431	-1.6856
CPC003_HCC515_24H:BRD-K73589491-001-05-4:10	BRD-K73589491	nizatidine	HCC515	trt_cp	10 uM	24 h	3	78	0.22	0.132461	1	0	1	1	0	Histamine receptor antagonist	HRH2	-0.5599	1.542	-1.6854
LJP007_NPC.TAK_24H:C07	BRD-K59184148	SB-216763	NPC	trt_cp	10 uM	24 h	3	335	0.579	0.445341	1	1	1	1	0	GSK inhibitor	GSK3B|CCNA2|CDK2|GSK3A	-0.5595	1.5277	-1.6842
REP.A006_YAPC_24H:K16	BRD-A22380646	pantoprazole	YAPC	trt_cp	0.37 uM	24 h	3	83	0.1732	0.121239	1	0	1	1	0	Proton pump inhibitor	ATP4A|CYP2C19|CYP3A4	-0.5595	1.526	-1.6841
REP.A012_JURKAT_24H:K01	BRD-A02367930	BRD-A02367930	JURKAT	trt_cp	10 uM	24 h	3	84	0.187	0.126733	1	0	1	1	0	Estrogen receptor agonist|DNA directed DNA polymerase stimunlant|Estrogenic component in oral contraceptives	ESR1|CYP2C8|ESR2|NR1I2	-0.5592	1.4813	-1.6834
REP.B023_HELA_24H:D04	BRD-A68281735	REV-5901	HELA	trt_cp	0.01 uM	24 h	2	47	0.2775	0.115481	1	1	1	1	0	Leukotriene receptor antagonist|Lipoxygenase inhibitor	ALOX5	-0.5592	1.4838	-1.6834
CPC005_HT29_24H:BRD-K55454768-001-01-8:10	BRD-K55454768	TAS-301	HT29	trt_cp	10 uM	24 h	3	173	0.28	0.222553	1	1	1	1	0	Calcium channel blocker	CAMK2A	-0.5591	1.4712	-1.683
REP.B011_HELA_24H:I08	BRD-K06388322	pramipexole	HELA	trt_cp	0.74 uM	24 h	2	96	0.2423	0.154221	1	1	1	1	0	Dopamine receptor agonist	DRD3|DRD2|ADRA2A|ADRA2B|ADRA2C|DRD1|DRD4|DRD5|HTR1A|HTR1B|HTR1D|HTR2A|HTR2B|HTR2C	-0.559	1.4712	-1.6827
REP.A012_JURKAT_24H:E08	BRD-A00938334	drospirenone	JURKAT	trt_cp	3.33 uM	24 h	3	110	0.2023	0.150843	1	0	1	1	0	Mineralocorticoid receptor antagonist	NR3C2|PGR|AR	-0.5585	1.4712	-1.6813
CPD003_MCF7_24H:G06	BRD-K54262262	monobenzone	MCF7	trt_cp	10 uM	24 h	3	154	0.2683	0.205542	1	1	1	1	0	Melanin inhibitor	TYR	-0.5584	1.4712	-1.6808
CPC001_HCC515_24H:BRD-K67080878-001-05-5:10	BRD-K67080878	milrinone	HCC515	trt_cp	10 uM	24 h	3	82	0.31	0.16122	1	0	1	1	0	Phosphodiesterase inhibitor	PDE3A|PDE2A|PDE3B|PDE5A	-0.5584	1.4712	-1.6808
REP.A027_HT29_24H:N19	BRD-K99604664	tanaproget	HT29	trt_cp	10 uM	24 h	3	249	0.3399	0.294175	0	0	1	1	0	Progesterone receptor agonist	PGR	-0.5583	1.4712	-1.6805
LJP009_THP1_24H:A24	BRD-A10523515	GSK-429286A	THP1	trt_cp	0.04 uM	24 h	2	82	0.2276	0.138141	1	1	1	1	0	Rho associated kinase inhibitor	ROCK1	-0.5582	1.4712	-1.6802
CPC015_A375_6H:BRD-K42500029-001-01-9:10	BRD-K42500029	CGP-57380	A375	trt_cp	10 uM	6 h	3	326	0.39	0.360555	1	1	1	1	0	MAP kinase inhibitor	MKNK1|AURKB|LCK|MKNK2|SGK1	-0.5579	1.4712	-1.6793
REP.B028_A375_24H:G23	BRD-K94397152	ribavirin	A375	trt_cp	0.03 uM	24 h	2	141	0.2675	0.196382	1	1	1	1	0	Antiviral	IMPDH1|ADK|ENPP1|IMPDH2|NT5C2	-0.5578	1.4712	-1.6792
LIVB002_HUH7_72H:K04	BRD-A79903587	tegafur	HUH7	trt_cp	15 uM	72 h	3	108	0.07	0.0879208	0	0	1	1	0	Thymidylate synthase inhibitor	TYMS	-0.5578	1.4712	-1.6791
CPC005_MCF7_6H:N18	BRD-K50214219	CS-1657	MCF7	trt_cp	10 uM	6 h	4	118	0.0969	0.108127	1	0	1	1	0	PARP inhibitor	PARP1	-0.5577	1.4712	-1.6789
CPC018_MCF7_6H:BRD-A85025557-001-01-7:10	BRD-A85025557	NCS-382	MCF7	trt_cp	10 uM	6 h	3	56	0.15	0.0926766	1	0	1	1	0	GABA receptor antagonist	GABBR1|GABBR2|SLC52A2	-0.5577	1.4712	-1.6789
REP.A028_HEK293_24H:E23	BRD-K93645900	tadalafil	HEK293	trt_cp	0.125 uM	24 h	2	143	0.2014	0.171604	0	0	1	1	0	Phosphodiesterase inhibitor	PDE5A|PDE11A	-0.5577	1.4712	-1.6788
CPC003_PC3_24H:BRD-K11107424-001-01-1:10	BRD-K11107424	tiotidine	PC3	trt_cp	10 uM	24 h	5	154	0.09	0.119045	1	0	1	1	0	Histamine receptor antagonist	HRH2	-0.5576	1.4712	-1.6785
REP.B017_YAPC_24H:M22	BRD-K62737565	gabapentin	YAPC	trt_cp	0.08 uM	24 h	2	112	0.0953	0.104469	1	0	1	1	0	Calcium channel blocker	CACNA2D1|CACNA2D2|CACNA1B|ADORA1|CACNA1A|CACNA1C|CACNA1D|CACNA1E|CACNA1F|CACNA1G|CACNA1H|CACNA1I|CACNA1S|CACNA2D3|CACNA2D4|CACNB1|CACNB2|CACNB3|CACNB4|CACNG1|CACNG2|CACNG3|CACNG4|CACNG5|CACNG6|CACNG7|CACNG8|GRIN1|GRIN2A|GRIN2B|GRIN2C|GRIN2D|GRIN3A|GRIN3B	-0.5574	1.4712	-1.678
CPC005_PC3_6H:BRD-K88849294-001-08-8:10	BRD-K88849294	lobaric-acid	PC3	trt_cp	10 uM	6 h	4	72	0.14	0.101522	1	0	1	1	0	Tyrosine phosphatase inhibitor	PTPN1	-0.5574	1.4712	-1.6779
CPC014_HEPG2_6H:BRD-K83972459-001-01-9:10	BRD-K83972459	JWE-035	HEPG2	trt_cp	10 uM	6 h	3	246	0.45	0.336437	1	1	1	1	0	Aurora kinase inhibitor	AURKA	-0.5573	1.4712	-1.6777
CPC005_MCF7_24H:BRD-A65145453-001-02-0:10	BRD-A65145453	ATPA	MCF7	trt_cp	10 uM	24 h	5	227	0.12	0.166891	1	0	1	1	0	Glutamate receptor agonist	GRIK1|GRIA2	-0.5573	1.4712	-1.6776
LIVB002_HUH7_72H:D14	BRD-K07208025	trimethoprim	HUH7	trt_cp	12 uM	72 h	3	99	0.04	0.0636324	0	0	1	1	0	Dihydrofolate reductase inhibitor	CYP2C8|SLC22A2|DHFR|TYMS	-0.5573	1.4712	-1.6776
CPC017_PHH_24H:BRD-A59943784-001-01-8:10	BRD-A59943784	fluticasone	PHH	trt_cp	10 uM	24 h	3	129	0.14	0.135891	0	0	1	1	0	Glucocorticoid receptor agonist	NR3C1|PGR	-0.5572	1.4712	-1.6772
REP.A012_MDAMB231_24H:E10	BRD-A00938334	drospirenone	MDAMB231	trt_cp	0.37 uM	24 h	2	128	0.2144	0.167513	0	0	1	1	0	Mineralocorticoid receptor antagonist	NR3C2|PGR|AR	-0.5572	1.4712	-1.6772
CPC016_NEU_24H:BRD-K80315159-051-01-2:10	BRD-K80315159	DPPE	NEU	trt_cp	10 uM	24 h	3	67	0.02	0.0370154	0	0	1	1	0	Histamine receptor antagonist	ABCB1|HRH1	-0.5569	1.4712	-1.6764
CPC016_MCF7_6H:BRD-K97810537-001-03-7:10	BRD-K97810537	beclomethasone-dipropionate	MCF7	trt_cp	10 uM	6 h	3	88	0.26	0.152953	1	0	1	1	0	Immunosuppressant|Glucocorticoid receptor agonist	NR3C1|CYP3A5|ADGRG3	-0.5562	1.4712	-1.6742
CPC020_A549_6H:BRD-A79672927-001-15-7:10	BRD-A79672927	tropicamide	A549	trt_cp	10 uM	6 h	4	179	0.34	0.249457	0	0	1	1	0	Acetylcholine receptor antagonist	CHRM3|CHRM4|CHRM1|CHRM2	-0.5561	1.4712	-1.6741
LPROT004_YAPC_6H:BRD-K65592642:10	BRD-K65592642	BRD-K65592642	YAPC	trt_cp	10 uM	6 h	3	90	0.39	0.189445	1	0	1	1	0	Gamma secretase inhibitor	PSEN1	-0.5562	1.4712	-1.6741
CPC016_A549_6H:BRD-K32584078-001-02-3:10	BRD-K32584078	BML-257	A549	trt_cp	10 uM	6 h	2	77	0.38	0.172969	0	0	1	1	0	AKT inhibitor|HCV inhibitor	AKT1	-0.5561	1.4712	-1.674
CPD003_MCF7_24H:H06	BRD-A49172652	lansoprazole	MCF7	trt_cp	10 uM	24 h	3	238	0.4257	0.321863	1	1	1	1	0	Proton pump inhibitor	ATP4A|CYP2C19|CYP3A4|CYP3A5|ATP4B	-0.5558	1.4712	-1.673
LCP001_MCF10A.PIK3CA.HH_24H:L10	BRD-K26531771	EPZ-5676	MCF10A	trt_cp	10 uM	24 h	3	46	0.4	0.137164	1	1	1	1	0	DOT1L inhibitor	DOT1L	-0.5556	1.4712	-1.6724
CPC015_A549_6H:BRD-A25143711-001-01-4:10	BRD-A25143711	hydrocortisone-valerate	A549	trt_cp	10 uM	6 h	2	85	0.27	0.153187	0	0	1	1	0	Corticosteroid agonist|Glucocorticoid receptor agonist	NR3C1	-0.5552	1.4712	-1.6713
LPROT002_MCF7_6H:BRD-K65716359:10	BRD-K65716359	exifone	MCF7	trt_cp	10 uM	6 h	3	77	0.16	0.112237	1	0	1	1	0	Nootropic agent	TYR	-0.5546	1.4712	-1.6695
CPC020_HCC515_6H:BRD-K94830329-001-01-4:10	BRD-K94830329	ataluren	HCC515	trt_cp	10 uM	6 h	2	66	0.16	0.103911	1	0	1	1	0	CFTR channel agonist|Dystrophin stimulant	DMD|CFTR|F8|F9	-0.5546	1.4712	-1.6694
LJP009_HME1_24H:C01	BRD-K83972459	JWE-035	HME1	trt_cp	10 uM	24 h	3	512	0.7931	0.644361	1	1	1	1	0	Aurora kinase inhibitor	AURKA	-0.5545	1.4712	-1.6691
CPC018_PHH_24H:BRD-K08806317-050-03-6:10	BRD-K08806317	timolol	PHH	trt_cp	10 uM	24 h	3	211	0.4	0.293766	0	0	1	1	0	Adrenergic receptor antagonist	ADRB2|ADRB1	-0.5543	1.4712	-1.6685
REP.B022_A549_24H:M15	BRD-K72414522	AZD-5438	A549	trt_cp	0.25 uM	24 h	2	249	0.3049	0.278618	0	0	1	1	0	CDK inhibitor	CCNB1|CCNE1|CDK1|CDK2|KCNH2	-0.5541	1.4712	-1.668
REP.B028_PC3_24H:I16	BRD-K95260951	asenapine	PC3	trt_cp	0.08 uM	24 h	2	105	0.2366	0.15938	1	1	1	1	0	Dopamine receptor antagonist|Serotonin receptor antagonist	DRD2|HTR2A|DRD1|HRH1|HTR1A|HTR1B|ADRA1A|ADRA2A|ADRA2B|ADRA2C|ADRB1|ADRB2|DRD3|DRD4|HRH2|HTR1D|HTR1E|HTR2B|HTR2C|HTR5A|HTR6|HTR7	-0.5541	1.4712	-1.6679
RAD001_A549_6H:BRD-K57545991-050-16-5:1.1111	BRD-K57545991	enalapril	A549	trt_cp	1.11 uM	6 h	3	219	0.46	0.320946	0	0	1	1	0	ACE inhibitor	ACE	-0.554	1.4712	-1.6678
CPC005_HCC515_6H:BRD-K26979635-001-01-1:10	BRD-K26979635	NS-3694	HCC515	trt_cp	10 uM	6 h	2	116	0.14	0.128862	1	0	1	1	0	Glutamate receptor antagonist	CASP9	-0.554	1.4712	-1.6677
CPC006_VCAP_6H:BRD-K73261812-001-01-1:10	BRD-K73261812	BRD-K73261812	VCAP	trt_cp	10 uM	6 h	4	253	0.45	0.341191	1	1	1	1	0	Beta catenin inhibitor	CTNNB1	-0.554	1.4712	-1.6677
PBIOA017_HEPG2_24H:C16	BRD-K21733600	rofecoxib	HEPG2	trt_cp	0.37 uM	24 h	2	61	0.13	0.0900466	1	1	1	1	0	Cyclooxygenase inhibitor	PTGS2|CYP3A4|ELN	-0.554	1.4712	-1.6675
CPC005_HCC515_6H:BRD-A43671941-003-03-6:10	BRD-A43671941	oxprenolol	HCC515	trt_cp	10 uM	6 h	2	82	0.07	0.0766102	1	1	1	1	0	Adrenergic receptor antagonist	ADRB1|ADRB2	-0.5539	1.4712	-1.6673
EMU001_OCILY3_24H:I18	BRD-K71035033	masitinib	OCILY3	trt_cp	0.01 uM	24 h	3	174	0.3222	0.239424	1	1	1	1	0	KIT inhibitor|PDGFR inhibitor|Src inhibitor	KIT|FGFR3|LYN|PDGFRB|PDGFRA	-0.5538	1.4712	-1.6671
REP.A005_YAPC_24H:A19	BRD-K08109215	I-BET-762	YAPC	trt_cp	10 uM	24 h	3	457	0.6363	0.54528	0	0	1	1	0	Bromodomain inhibitor	BRD2|BRD3|BRD4|APOA1	-0.5538	1.4712	-1.667
REP.B011_YAPC_24H:L03	BRD-K06900071	tebipenem	YAPC	trt_cp	0.25 uM	24 h	2	41	0.13	0.0738234	0	0	1	1	0	Bacterial cell wall synthesis inhibitor	CNR1	-0.5536	1.4712	-1.6666
REP.A027_MCF10A_24H:M09	BRD-K90868879	canagliflozin	MCF10A	trt_cp	1.11 uM	24 h	3	115	0.1481	0.131964	0	0	1	1	0	Sodium channel inhibitor	SLC5A2|SLC5A1|CYP2B6|CYP2C8	-0.5536	1.4712	-1.6666
REP.A014_HEK293_24H:M14	BRD-A39390670	rabeprazole	HEK293	trt_cp	3.33 uM	24 h	3	136	0.1328	0.135894	0	0	1	1	0	Proton pump inhibitor|Gastrin inhibitor	ATP4A|CYP2C19	-0.5537	1.4712	-1.6666
PAC004_U2OS_6H:BRD-K13211965-001-01-4:10	BRD-K13211965	L-741742	U2OS	trt_cp	10 uM	6 h	2	48	0.24	0.108532	1	1	1	1	0	Dopamine receptor antagonist	DRD4|DRD3|SCN1A|SCN3A	-0.5535	1.471	-1.6661
LJP008_SKL_24H:I04	BRD-K08109215	I-BET-762	SKL	trt_cp	0.37 uM	24 h	3	245	0.5997	0.387597	1	1	1	1	0	Bromodomain inhibitor	BRD2|BRD3|BRD4|APOA1	-0.5532	1.4698	-1.6652
LJP007_HEK293_24H:J20	BRD-K74065929	doramapimod	HEK293	trt_cp	3.33 uM	24 h	2	77	0.2367	0.136513	1	1	1	1	0	P38 MAPK inhibitor	MAPK14|MAPK11|MAPK12|DDR2|MAPK13	-0.5529	1.4683	-1.6644
REP.A023_JURKAT_24H:J01	BRD-K70490179	rimcazole	JURKAT	trt_cp	10 uM	24 h	3	195	0.1381	0.165938	0	0	1	1	0	Sigma receptor antagonist	SIGMAR1	-0.5529	1.4683	-1.6643
REP.B001_HA1E_24H:C08	BRD-K25943794	blonanserin	HA1E	trt_cp	0.74 uM	24 h	3	102	0.2171	0.150474	1	1	1	1	0	Dopamine receptor antagonist|Serotonin receptor antagonist	DRD2|HTR2A	-0.5528	1.4677	-1.664
CPC014_PHH_24H:BRD-K09186807-001-01-6:10	BRD-K09186807	KIN001-244	PHH	trt_cp	10 uM	24 h	4	277	0.08	0.150527	0	0	1	1	0	PDK1 Inhibitor	PDPK1	-0.5525	1.4649	-1.6631
CPC002_PC3_24H:BRD-K39188321-001-03-9:10	BRD-K39188321	betamethasone	PC3	trt_cp	10 uM	24 h	5	205	0.29	0.246551	1	0	1	1	0	Glucocorticoid receptor agonist	NR3C1	-0.5524	1.4639	-1.663
CPC014_NEU_24H:BRD-K80725632-001-04-8:10	BRD-K80725632	lavendustin-c	NEU	trt_cp	10 uM	24 h	2	63	0.06	0.0621694	0	0	1	1	0	EGFR inhibitor	CAMK2A|EGFR|SRC	-0.5524	1.4631	-1.6628
REP.B016_HEK293_24H:A24	BRD-K51313569	palbociclib	HEK293	trt_cp	0.01 uM	24 h	2	223	0.1677	0.195546	0	0	1	1	0	CDK inhibitor	CDK4|CDK6|CCND3	-0.552	1.4548	-1.6618
CPC002_HA1E_24H:BRD-K49657628-001-05-6:10	BRD-K49657628	BRD-K49657628	HA1E	trt_cp	10 uM	24 h	3	118	0.27	0.18049	1	1	1	1	0	EGFR inhibitor|Tyrosine kinase inhibitor	EGFR	-0.5519	1.4512	-1.6614
LJP006_HA1E_24H:N13	BRD-K92723993	imatinib	HA1E	trt_cp	10 uM	24 h	3	98	0.44	0.209976	1	1	1	1	0	PDGFR inhibitor|Bcr-Abl inhibitor|KIT inhibitor	ABL1|KIT|PDGFRA|BCR|CSF1R|PDGFRB|ABCG2|CYP2C19|CYP2C8|CYP3A5|DDR1|NTRK1|RET	-0.5519	1.449	-1.6613
CPD003_PC3_24H:BRD-K37949327-304-05-3:10	BRD-K37949327	etidronic-acid	PC3	trt_cp	10 uM	24 h	2	52	0.29	0.124174	1	0	1	1	0	Bone resorption inhibitor	PTPRS|FDPS|ATP6V1A	-0.5516	1.4354	-1.6605
CPC002_HCC515_6H:BRD-K43245338-001-02-4:10	BRD-K43245338	MDL-28170	HCC515	trt_cp	10 uM	6 h	3	241	0.29	0.267324	1	0	1	1	0	Calpain inhibitor	CTSB|CAPN1	-0.5516	1.4302	-1.6603
REP.A010_MCF10A_24H:L09	BRD-K14653796	tasquinimod	MCF10A	trt_cp	1.11 uM	24 h	2	111	0.4571	0.227771	1	1	1	1	0	Angiogenesis inhibitor|S100A9 inhibitor	HDAC4|S100A9	-0.5516	1.4303	-1.6603
REP.B009_MCF7_24H:E09	BRD-K29530284	amlexanox	MCF7	trt_cp	0.25 uM	24 h	2	108	0.3117	0.185529	0	0	1	1	0	Histamine receptor antagonist	FGF1|IL3|PDE4A|PDE4B|PDE4C|PDE4D|S100A12|S100A13	-0.5515	1.4174	-1.6601
CPC017_A549_6H:BRD-K15086322-103-01-0:10	BRD-K15086322	JNJ-10191584	A549	trt_cp	10 uM	6 h	3	84	0.14	0.109656	1	0	1	1	0	Histamine receptor antagonist	HRH4	-0.5514	1.4065	-1.66
CPC014_NEU_24H:BRD-K77286328-001-02-9:10	BRD-K77286328	reversine	NEU	trt_cp	10 uM	24 h	2	45	0.25	0.107252	0	0	1	1	0	Aurora kinase inhibitor	AURKB|ADORA3|AURKA|INCENP|MAP2K1	-0.5511	1.3683	-1.6589
REP.B022_MCF7_24H:J12	BRD-K72215350	acexamic-acid	MCF7	trt_cp	0.01 uM	24 h	2	117	0.314	0.193815	1	1	1	1	0	Gastrin inhibitor|5-alpha reductase inhibitor|Reducing agent	GAST|SRD5A1	-0.5505	1.3404	-1.6572
LJP009_NEU_24H:I09	BRD-K47983010	BX-795	NEU	trt_cp	1.11 uM	24 h	3	147	0.4151	0.249785	0	0	1	1	0	IKK inhibitor	PDPK1|IKBKE|TBK1|CDK2|CHEK1|GSK3B|KDR|PDK1	-0.5503	1.3317	-1.6565
REP.A015_YAPC_24H:L11	BRD-K59331299	voglibose	YAPC	trt_cp	0.125 uM	24 h	3	101	0.325	0.183203	1	0	1	1	0	Glucosidase inhibitor	GAA|MGAM	-0.5502	1.3288	-1.6562
CPC006_AGS_6H:BRD-K68997413-001-01-0:10	BRD-K68997413	PF-3845	AGS	trt_cp	10 uM	6 h	2	76	0.41	0.178496	1	1	1	1	0	FAAH inhibitor	FAAH	-0.55	1.3223	-1.6555
REP.B022_MCF10A_24H:P09	BRD-A82035391	tolvaptan	MCF10A	trt_cp	0.25 uM	24 h	2	138	0.1717	0.155652	0	0	1	1	0	Vasopressin receptor antagonist	AVPR2|AVPR1A	-0.5496	1.3173	-1.6543
REP.B010_MDAMB231_24H:O23	BRD-K15426076	iguratimod	MDAMB231	trt_cp	0.03 uM	24 h	2	64	0.1838	0.109671	0	0	1	1	0	Cyclooxygenase inhibitor|NFKB inhibitor	PTGS2	-0.5491	1.3173	-1.6528
LJP006_LNCAP_24H:J04	BRD-K72414522	AZD-5438	LNCAP	trt_cp	0.37 uM	24 h	2	96	0.4613	0.212793	1	1	1	1	0	CDK inhibitor	CCNB1|CCNE1|CDK1|CDK2|KCNH2	-0.549	1.3173	-1.6527
CPC016_HEPG2_6H:BRD-A18579359-001-02-3:10	BRD-A18579359	wiskostatin	HEPG2	trt_cp	10 uM	6 h	3	165	0.3	0.224974	1	1	1	1	0	Neural Wiskott-Aldrich syndrome protein inhibitor	WAS|WASL	-0.549	1.3173	-1.6525
POL001_HEPG2_24H:C07	BRD-K08132273	tyrphostin	HEPG2	trt_cp	10 uM	24 h	3	73	0.23	0.131026	1	1	1	1	0	EGFR inhibitor	ERBB2	-0.5489	1.3173	-1.6524
CPC003_PC3_24H:BRD-A25143711-001-01-4:10	BRD-A25143711	hydrocortisone-valerate	PC3	trt_cp	10 uM	24 h	5	108	0.14	0.124339	0	0	1	1	0	Corticosteroid agonist|Glucocorticoid receptor agonist	NR3C1	-0.5487	1.3173	-1.6518
REP.A025_HELA_24H:H14	BRD-K73999723	telmisartan	HELA	trt_cp	3.33 uM	24 h	3	78	0.1904	0.123229	1	0	1	1	0	Angiotensin receptor antagonist	AGTR1|PPARG|CYP2C19|CYP2J2|PPARA	-0.5486	1.3173	-1.6515
REP.B014_A375_24H:N11	BRD-A38218502	metenkephalin	A375	trt_cp	0.03 uM	24 h	2	98	0.3614	0.1903	1	1	1	1	0	Immunostimulant	OGFR|OPRD1	-0.5486	1.3173	-1.6513
CPC011_A549_6H:BRD-K51485625-001-04-3:10	BRD-K51485625	ritonavir	A549	trt_cp	10 uM	6 h	3	111	0.17	0.138905	1	0	1	1	0	HIV inhibitor	CYP3A4|CYP1A2|CYP2B6|CYP2C19|CYP3A5|CYP3A7|CYP2C8|CYP2C9|CYP2D6|CYP2E1	-0.5485	1.3173	-1.651
CPC005_PC3_6H:BRD-A37347161-003-01-8:10	BRD-A37347161	BRL-52537	PC3	trt_cp	10 uM	6 h	4	88	0.09	0.0899898	1	0	1	1	0	Opioid receptor agonist	OPRK1	-0.5484	1.3173	-1.6507
LPROT002_A549_6H:BRD-K87465484:0.5	BRD-K87465484	UNC-0646	A549	trt_cp	0.5 uM	6 h	3	70	0.4	0.169204	1	1	1	1	0	Histone lysine methyltransferase inhibitor	EHMT2	-0.5483	1.3173	-1.6504
REP.B023_HELA_24H:B19	BRD-K68095457	palmitoylethanolamide	HELA	trt_cp	2.22 uM	24 h	2	38	0.1249	0.0696632	1	0	1	1	0	Cannabinoid receptor agonist	CNR2|GPR119|GPR55	-0.5482	1.3173	-1.6503
REP.B019_A375_24H:D04	BRD-K45168550	SB-756050	A375	trt_cp	0.08 uM	24 h	2	101	0.4299	0.210705	1	1	1	1	0	G protein-coupled receptor agonist	GPBAR1	-0.5481	1.3173	-1.6499
PBIOA019_HT29_24H:E07	BRD-K96354014	nifedipine	HT29	trt_cp	10 uM	24 h	3	157	0.23	0.192152	1	1	1	1	0	Calcium channel blocker	CACNA1C|CACNA1D|CACNA1S|CACNA1F|CACNA2D1|CYP3A5|CACNA1H|CACNB2|CALM1|GLRA1|GLRA3|GLRB|KCNA1|KCNA5|NR1I2|TRPM3	-0.548	1.3173	-1.6497
REP.A014_HEK293_24H:M10	BRD-K38197229	bumetanide	HEK293	trt_cp	0.37 uM	24 h	3	164	0.121	0.142444	0	0	1	1	0	Solute carrier family member inhibitor	SLC12A1|SLC12A2|CFTR|GPR35|SLC12A4|SLC12A5	-0.548	1.3173	-1.6496
PBIOA022_HEPG2_24H:K10	BRD-A13084692	troglitazone	HEPG2	trt_cp	10 uM	24 h	3	142	0.38	0.234891	1	1	1	1	0	PPAR receptor agonist|Insulin sensitizer	PPARG|AKR1B1|CCL2|CYP3A4|INS|ACSL4|ESRRA|ESRRG|SERPINE1|SLC29A1|TRPM3	-0.5479	1.3173	-1.6492
REP.A003_YAPC_24H:H24	BRD-K33453211	levocabastine	YAPC	trt_cp	0.04 uM	24 h	3	183	0.1425	0.163291	0	0	1	1	0	Histamine receptor antagonist	HRH1|NTSR2	-0.5478	1.3173	-1.6491
CPC004_PC3_24H:BRD-K77925998-050-06-9:10	BRD-K77925998	quipazine	PC3	trt_cp	10 uM	24 h	5	115	0.21	0.157141	0	0	1	1	0	Serotonin receptor agonist	HTR2A	-0.5477	1.3173	-1.6488
REP.A025_THP1_24H:G08	BRD-K73815512	HC-030031	THP1	trt_cp	3.33 uM	24 h	3	53	0.1659	0.0948182	1	1	1	1	0	TRPA1 channel blocker	TRPA1	-0.5477	1.3173	-1.6486
MOAR006_PC3_24H:E14	BRD-K97072811	TG-003	PC3	trt_cp	3.33 uM	24 h	3	88	0.1	0.0948576	1	0	1	1	0	CLK inhibitor	CLK1|CLK4|DYRK1A|DYRK1B	-0.5476	1.3173	-1.6484
CPC001_HA1E_24H:BRD-A43930669-003-01-0:10	BRD-A43930669	L-368899	HA1E	trt_cp	10 uM	24 h	3	129	0.3	0.198923	1	1	1	1	0	Oxytocin receptor antagonist	OXTR|OXT|AVPR1A|AVPR2	-0.5473	1.3173	-1.6475
REP.B027_JURKAT_24H:O15	BRD-A97739905	ketoprofen	JURKAT	trt_cp	0.25 uM	24 h	2	108	0.1295	0.119585	0	0	1	1	0	Cyclooxygenase inhibitor	PTGS2|PTGS1|CXCR1|SLC5A8	-0.5472	1.3173	-1.6472
PBIOA016_HCC515_24H:B07	BRD-K89732114	trifluoperazine	HCC515	trt_cp	10 uM	24 h	3	287	0.49	0.379201	1	1	1	1	0	Dopamine receptor antagonist	DRD2|ABCG2|CAMK2A|SCN4A|SCN9A|ADRA1A|CALM1|CALY|DRD4|HRH1|HTR2A|HTR2C|S100A4|TNNC1	-0.5472	1.3173	-1.6471
REP.B022_MCF10A_24H:H11	BRD-A70858459	estramustine	MCF10A	trt_cp	0.03 uM	24 h	2	154	0.2522	0.19928	0	0	1	1	0	DNA inhibitor	ESR1|ESR2|MAP1A|MAP2	-0.5472	1.3173	-1.6471
CPC006_PC3_6H:BRD-K68336408-001-04-2:56.78	BRD-K68336408	BRD-K68336408	PC3	trt_cp	60 uM	6 h	4	345	0.51	0.424156	1	1	1	1	0	EGFR inhibitor	EGFR|MAPK14	-0.547	1.3173	-1.6467
NMH002_NPC_6H:BRD-K08478539-001-09-6:10	BRD-K08478539	SMER-28	NPC	trt_cp	10 uM	6 h	3	77	0.31	0.156227	1	0	1	1	0	Autophagy inducer	SNCA	-0.547	1.3173	-1.6467
CPC005_PC3_24H:BRD-K83302049-003-01-2:10	BRD-K83302049	protopine	PC3	trt_cp	10 uM	24 h	5	93	0.17	0.127144	1	0	1	1	0	Histamine receptor antagonist	ACHE	-0.5469	1.3173	-1.6462
REP.B013_HUVEC.A_24H:P22	BRD-K44353683	nateglinide	HUVEC	trt_cp	0.08 uM	24 h	2	175	0.0353	0.0794762	0	0	1	1	0	Insulin secretagogue	ABCC8|KCNJ11|CYP3A4|INS|KCNJ10|PPARG	-0.5469	1.3173	-1.6461
REP.B023_A549_24H:K19	BRD-K71106091	fludarabine-phosphate	A549	trt_cp	2.22 uM	24 h	2	109	0.2482	0.16632	0	0	1	1	0	DNA inhibitor|DNA repair enzyme inhibitor|Purine antagonist	POLA1|RRM1|DCK|POLD1|POLE|RRM2|RRM2B	-0.5467	1.3173	-1.6458
PBIOA015_A375_24H:N08	BRD-K13044802	ciclopirox	A375	trt_cp	3.33 uM	24 h	2	264	0.47	0.35619	1	1	1	1	0	Membrane integrity inhibitor	ATP1A1	-0.5467	1.3173	-1.6457
REP.A021_HELA_24H:B15	BRD-K80396088	gliquidone	HELA	trt_cp	1.11 uM	24 h	3	122	0.4316	0.232034	1	1	1	1	0	Sulfonylurea	ABCC8|KCNJ11|KCNJ10|KCNJ8	-0.5467	1.3173	-1.6455
CPC011_HA1E_6H:BRD-K57930253-001-06-6:10	BRD-K57930253	nitrazepam	HA1E	trt_cp	10 uM	6 h	2	98	0.27	0.164485	1	0	1	1	0	Benzodiazepine receptor agonist	GABRA1	-0.5466	1.3173	-1.6452
REP.A022_A375_24H:P07	BRD-A82035391	tolvaptan	A375	trt_cp	10 uM	24 h	3	128	0.2615	0.185	1	1	1	1	0	Vasopressin receptor antagonist	AVPR2|AVPR1A	-0.5463	1.3173	-1.6446
NMH001_NEU_24H:BRD-K36055864-001-15-0:10	BRD-K36055864	cycloheximide	NEU	trt_cp	10 uM	24 h	3	424	0.67	0.538953	0	0	1	1	0	Protein synthesis inhibitor	GSK3B|RPL3	-0.5463	1.3173	-1.6445
REP.A008_PC3_24H:P14	BRD-A89585551	mefloquine	PC3	trt_cp	3.33 uM	24 h	2	48	0.114	0.0748003	0	0	1	1	0	Adenosine receptor antagonist|Hemoglobin antagonist	PANX1|ADORA2A|HBA1	-0.5461	1.3173	-1.6438
MOAR016_HAP1.PRKCQ_24H:H15	BRD-K22385716	LY-303511	HAP1	trt_cp	3.33 uM	24 h	3	80	0.1454	0.109058	1	1	1	1	0	Casein kinase inhibitor|PI3K inhibitor	CSNK2A1|CSNK2A2|CSNK2B|MTOR|BRD2|BRD3|BRD4	-0.5461	1.3173	-1.6438
CPC006_PC3_24H:M05	BRD-K36324071	NF-449	PC3	trt_cp	10 uM	24 h	5	106	0.2527	0.165495	1	1	1	1	0	Purinergic receptor antagonist	P2RX1	-0.5459	1.3173	-1.6433
REP.A015_HEK293_24H:P24	BRD-K61567297	resatorvid	HEK293	trt_cp	0.04 uM	24 h	2	124	0.3654	0.215241	1	1	1	1	0	TLR antagonist	TLR4	-0.5458	1.3173	-1.6429
CPC014_PHH_24H:BRD-K77175907-001-03-1:10	BRD-K77175907	calcifediol	PHH	trt_cp	10 uM	24 h	4	46	0.11	0.0719293	0	0	1	1	0	Vitamin D receptor agonist	VDR	-0.5457	1.3173	-1.6426
REP.A027_MCF7_24H:H24	BRD-K97101532	VX-661	MCF7	trt_cp	0.04 uM	24 h	2	115	0.1561	0.135482	0	0	1	1	0	CFTR channel agonist	CFTR	-0.5457	1.3173	-1.6426
REP.B020_THP1_24H:A19	BRD-K83405785	pimavanserin	THP1	trt_cp	2.22 uM	24 h	2	139	0.2448	0.186528	0	0	1	1	0	Serotonin receptor antagonist	HTR2A|DRD2	-0.5455	1.3173	-1.6422
CPC017_ASC_24H:BRD-A16694057-001-03-5:10	BRD-A16694057	BADGE	ASC	trt_cp	10 uM	24 h	4	106	0.09	0.0987654	1	0	1	1	0	PPAR receptor antagonist	PPARG	-0.5454	1.3173	-1.6418
CPC001_HCC515_6H:BRD-K76064317-001-03-2:10	BRD-K76064317	BRD-K76064317	HCC515	trt_cp	10 uM	6 h	2	73	0.15	0.105813	1	1	1	1	0	FLT3 inhibitor	FLT3	-0.5453	1.3173	-1.6414
REP.B019_YAPC_24H:D14	BRD-K45503887	delivert	YAPC	trt_cp	0.74 uM	24 h	2	121	0.2906	0.189614	1	1	1	1	0	Angiotensin receptor agonist	AGTR1|AGTR2	-0.5453	1.3173	-1.6414
LIVB002_HUH7_72H:P15	BRD-K74339692	tamsulosin	HUH7	trt_cp	8 uM	72 h	3	109	0.09	0.100153	0	0	1	1	0	Adrenergic receptor antagonist	ADRA1A|ADRA1B|ADRA1D	-0.5453	1.3173	-1.6414
CPC001_HCC515_24H:BRD-K48970916-001-03-0:10	BRD-K48970916	danazol	HCC515	trt_cp	10 uM	24 h	3	61	0.21	0.114447	1	0	1	1	0	Estrogen receptor antagonist|Progesterone receptor agonist	GNRHR|ESR1|CYP2C8|TNF|AR|CCL2|GNRHR2|PGR	-0.5453	1.3173	-1.6414
PAC005_U2OS_6H:BRD-A81177136-001-03-6:10	BRD-A81177136	KN-62	U2OS	trt_cp	10 uM	6 h	2	52	0.22	0.108154	1	1	1	1	0	Calcium channel blocker|Purinergic receptor antagonist	P2RX7|CAMK2A|AKT1|CHEK1|LCK|MAPK1|MAPK11|MAPK12|MAPK14|MAPK8|PRKCA|ROCK1|RPS6KB1|SGK1	-0.5452	1.3171	-1.6411
REP.A017_HELA_24H:M16	BRD-A61793559	metolazone	HELA	trt_cp	0.37 uM	24 h	3	162	0.3116	0.227189	1	1	1	1	0	Carbonic anhydrase inhibitor	SLC12A3|CA2|CA7	-0.5451	1.317	-1.641
REP.B004_HELA_24H:G09	BRD-K22031190	diflunisal	HELA	trt_cp	0.25 uM	24 h	3	161	0.3056	0.224295	1	1	1	1	0	Prostanoid receptor antagonist	PTGS2|PTGS1	-0.5451	1.3168	-1.6407
REP.B022_MCF7_24H:F04	BRD-K69236721	VX-809	MCF7	trt_cp	0.08 uM	24 h	2	58	0.2296	0.116689	1	1	1	1	0	CFTR channel agonist	CFTR	-0.5447	1.3138	-1.6397
CPC004_HCC515_24H:BRD-K17075857-001-06-9:10	BRD-K17075857	chloroxine	HCC515	trt_cp	10 uM	24 h	3	229	0.54	0.355586	1	1	1	1	0	Opioid receptor antagonist	OPRK1	-0.5447	1.3134	-1.6396
CPC006_H1299_6H:BRD-K17561142-003-16-8:10	BRD-K17561142	amiodarone	H1299	trt_cp	10 uM	6 h	2	90	0.46	0.205746	0	0	1	1	0	Potassium channel antagonist	KCNH2|CHRM3|CYP2C8|SCN5A|ADRB1|CACNA1H|CACNA2D2|KCNA7	-0.5446	1.3123	-1.6394
REP.A021_PC3_24H:F13	BRD-A82395837	ginkgolide-b	PC3	trt_cp	10 uM	24 h	3	78	0.1749	0.118106	1	0	1	1	0	Platelet activating factor receptor antagonist|GABA receptor antagonist|Glycine receptor antagonist|Immunosuppressant|Peptidase inhibitor|Protease inhibitor|Reducing agent	PTAFR|GLRA1|GLRB|GLRA2|GLRA3|HTR3A|HTR3B	-0.5445	1.3102	-1.6391
REP.B018_MCF7_24H:J05	BRD-K64755930	etazolate	MCF7	trt_cp	0.03 uM	24 h	2	75	0.2013	0.124246	1	1	1	1	0	Phosphodiesterase inhibitor	GABRB3|PDE4A	-0.5445	1.3109	-1.6391
LJP008_JURKAT_24H:I16	BRD-K26818574	BIX-01294	JURKAT	trt_cp	0.37 uM	24 h	2	118	0.4485	0.232623	0	0	1	1	0	DNA inhibitor|Histone lysine methyltransferase inhibitor	EHMT2|EHMT1	-0.5443	1.3045	-1.6384
REP.B021_A375_24H:O09	BRD-K86307448	allopurinol	A375	trt_cp	0.25 uM	24 h	2	101	0.2173	0.149803	1	1	1	1	0	Xanthine oxidase inhibitor	XDH	-0.5443	1.3035	-1.6383
LPROT004_YAPC_6H:BRD-K54997624:0.25	BRD-K54997624	alpelisib	YAPC	trt_cp	0.25 uM	6 h	3	63	0.48	0.175842	1	1	1	1	0	PI3K inhibitor	PIK3CA|PIK3CB|PIK3CD|PIK3CG	-0.5442	1.3018	-1.6381
NMH002_FIBRNPC_6H:BRD-K27710560-001-05-9:10	BRD-K27710560	splitomycin	NPC	trt_cp	10 uM	6 h	3	158	0.41	0.257366	1	1	1	1	0	SIRT inhibitor	SIRT2|SIRT1	-0.5441	1.2978	-1.6377
REP.A017_MDAMB231_24H:J12	BRD-K64931368	aminocaproic-acid	MDAMB231	trt_cp	0.04 uM	24 h	3	147	0.2194	0.181597	0	0	1	1	0	Plasminogen activator inhibitor	PLG|PLAT|LPA	-0.5441	1.2981	-1.6377
CPC006_H1299_6H:BRD-K88560311-011-02-2:10	BRD-K88560311	rucaparib	H1299	trt_cp	10 uM	6 h	2	56	0.44	0.158727	0	0	1	1	0	PARP inhibitor	PARP1|PARP2	-0.544	1.2964	-1.6376
REP.B011_MDAMB231_24H:D14	BRD-K04956647	nebivolol	MDAMB231	trt_cp	0.74 uM	24 h	2	132	0.2507	0.183948	0	0	1	1	0	Adrenergic receptor antagonist	ADRB1|ADRB2	-0.544	1.2951	-1.6375
REP.B011_HT29_24H:J10	BRD-K06557128	voriconazole	HT29	trt_cp	0.08 uM	24 h	2	87	0.302	0.163906	1	1	1	1	0	Cytochrome P450 inhibitor	CYP2C19|CYP51A1|CYP2C9|CYP3A4|CYP3A5|PTGS1	-0.5438	1.2845	-1.6369
ASG003_U2OS_48H:I24	BRD-K14880289	GW-501516	U2OS	trt_cp	0.12 uM	48 h	5	155	0.2492	0.198733	0	0	1	1	0	PPAR receptor agonist|Insulin sensitizer	PPARD|INS|PPARA	-0.5437	1.2842	-1.6368
LJP001_BT20_6H:BRD-K09991945-001-04-6:0.4	BRD-K09991945	BRD-K09991945	BT20	trt_cp	0.37 uM	6 h	4	107	0.24	0.162042	1	0	1	1	0	PKC inhibitor	GSK3B	-0.5437	1.2842	-1.6366
LJP008_SHSY5Y_24H:F19	BRD-K98203492	GSK-J4	SHSY5Y	trt_cp	10 uM	24 h	2	217	0.5384	0.345631	0	0	1	1	0	Histone lysine demethylase inhibitor	KDM6A|KDM6B|TNF	-0.5437	1.2842	-1.6365
LIVB002_HUH7_72H:J17	BRD-A55913614	primaquine	HUH7	trt_cp	12.5 uM	72 h	3	127	0.19	0.157076	0	0	1	1	0	Antimalarial|DNA inhibitor	KRT7|NQO2	-0.5436	1.2842	-1.6364
REP.A024_PC3_24H:H05	BRD-A75726477	clenbuterol	PC3	trt_cp	0.125 uM	24 h	3	117	0.2179	0.161455	1	0	1	1	0	Adrenergic receptor agonist	ADRB2|ADRB1|ADRB3|NGF|TNF	-0.5436	1.2842	-1.6363
LIVB002_HUH7_72H:E06	BRD-A08545410	doxycycline	HUH7	trt_cp	8 uM	72 h	3	117	0.17	0.142609	0	0	1	1	0	Bacterial 30S ribosomal subunit inhibitor	MMP8|MMP1	-0.5434	1.2842	-1.6359
REP.B024_A375_24H:G12	BRD-K75844781	mCPP	A375	trt_cp	0.01 uM	24 h	2	96	0.1408	0.117562	1	1	1	1	0	Serotonin receptor agonist	HTR2B|HTR2C|HTR1D|HTR2A|HTR1A|HTR1E|HTR6	-0.5434	1.2842	-1.6358
CPC005_HCC515_6H:BRD-A70407468-001-01-2:10	BRD-A70407468	PSB-36	HCC515	trt_cp	10 uM	6 h	2	103	0.09	0.0973577	1	0	1	1	0	Adenosine receptor antagonist	ADORA1|ADORA2A|ADORA2B|ADORA3	-0.5433	1.2842	-1.6354
REP.B023_YAPC_24H:E04	BRD-K68867920	quetiapine	YAPC	trt_cp	0.08 uM	24 h	2	130	0.1815	0.155325	1	1	1	1	0	Dopamine receptor antagonist|Serotonin receptor antagonist	DRD2|HTR1A|HTR2A|DRD1|HRH1|HTR1D|HTR1E|ADRA1A|ADRA1B|ADRA1D|ADRA2A|ADRA2B|ADRA2C|CHRM1|CHRM2|CHRM3|CHRM4|CHRM5|DRD3|DRD4|DRD5|HTR1B|HTR1F|HTR2C|HTR3A|HTR6|HTR7|SLC6A2	-0.5433	1.2842	-1.6354
CRCGN011_HEPG2_24H:BRD-K72222507:0.671081	BRD-K72222507	quinapril	HEPG2	trt_cp	0.66 uM	24 h	2	78	0.13	0.101824	0	0	1	1	0	ACE inhibitor	ACE	-0.543	1.2842	-1.6347
CPC016_A375_6H:BRD-A00993607-003-15-4:10	BRD-A00993607	alprenolol	A375	trt_cp	10 uM	6 h	5	121	0.17	0.145027	1	0	1	1	0	Adrenergic receptor antagonist	ADRB1|ADRB2|HTR1A	-0.543	1.2842	-1.6345
REP.A016_A549_24H:H07	BRD-K53414658	tivozanib	A549	trt_cp	10 uM	24 h	3	111	0.2489	0.168076	1	1	1	1	0	VEGFR inhibitor	FLT1|FLT4|KDR|KIT|PDGFRA|PDGFRB	-0.5429	1.2842	-1.6343
CPC011_PC3_24H:BRD-K50866992-003-07-9:10	BRD-K50866992	tropisetron	PC3	trt_cp	10 uM	24 h	4	135	0.32	0.210171	1	1	1	1	0	Serotonin receptor antagonist	HTR3A|GLRA1|GLRA2|GLRB|HTR4	-0.5429	1.2842	-1.6342
REP.A010_A375_24H:H03	BRD-K13154216	everolimus	A375	trt_cp	1.11 uM	24 h	3	307	0.5706	0.423219	0	0	1	1	0	MTOR inhibitor	MTOR|CYP3A5|FKBP1A	-0.5428	1.2842	-1.634
REP.A008_YAPC_24H:B10	BRD-K99107520	felbamate	YAPC	trt_cp	0.37 uM	24 h	3	83	0.0789	0.0818292	0	0	1	1	0	Glutamate receptor antagonist	GRIN2A|GRIN2B|GRIN3A|GRIN1|GRIN2C|GRIN2D|GRIN3B	-0.5426	1.2842	-1.6334
REP.B019_PC3_24H:H16	BRD-K47639036	flavoxate	PC3	trt_cp	0.08 uM	24 h	2	79	0.2219	0.133882	1	1	1	1	0	Acetylcholine receptor antagonist	CHRM1|CHRM2	-0.5426	1.2842	-1.6334
CPC005_A375_24H:BRD-A59303141-001-03-9:10	BRD-A59303141	quinethazone	A375	trt_cp	10 uM	24 h	3	133	0.27	0.191619	1	1	1	1	0	Thiazide diuretic	SLC12A3|CA1|CA2|SLC12A1|SLC12A2	-0.5426	1.2842	-1.6333
CPC002_HCC515_6H:BRD-K73824630-001-03-2:10	BRD-K73824630	skatole	HCC515	trt_cp	10 uM	6 h	3	90	0.36	0.182013	1	1	1	1	0	Thrombin inhibitor	CYP2F1	-0.5425	1.2842	-1.6331
LJP006_HA1E_24H:D14	BRD-K64890080	BI-2536	HA1E	trt_cp	3.33 uM	24 h	3	460	0.74	0.589964	1	1	1	1	0	PLK inhibitor	PLK1|BRD4|PLK2|PLK3	-0.5424	1.2842	-1.6327
CPC006_NOMO1_6H:BRD-K86191271-001-02-7:10	BRD-K86191271	cytosporone-b	NOMO1	trt_cp	10 uM	6 h	2	28	0.31	0.0942086	1	0	1	1	0	NUR77 receptor agonist	NR4A1	-0.5424	1.2842	-1.6327
REP.B017_HEK293_24H:O23	BRD-A61767428	ursolic-acid	HEK293	trt_cp	0.03 uM	24 h	2	102	0.3289	0.185209	1	1	1	1	0	11-beta-HSD1 inhibitor|Acetylcholinesterase inhibitor|Caspase inhibitor|HIV protease inhibitor|Lipid peroxidase inhibitor|Quorum sensing signaling modulator|Steryl sulfatase inhibitor|Tyrosine phosphatase inhibitor|ATPase inhibitor|NFKB inhibitor|STAT inhibitor	HSD11B1|PTPN1|ACHE|CASP3|STS|PLA2G1B|PYGM	-0.5423	1.2842	-1.6326
CPC006_HEPG2_6H:BRD-K27316855-001-02-6:1	BRD-K27316855	calcitriol	HEPG2	trt_cp	1.11 uM	6 h	3	161	0.21	0.185932	1	0	1	1	0	Vitamin D receptor agonist	VDR|CYP3A5	-0.5423	1.2842	-1.6326
CPC006_HT29_6H:H08	BRD-K15563106	phloretin	HT29	trt_cp	200 uM	6 h	5	233	0.4089	0.312117	1	1	1	1	0	Sodium channel inhibitor	AQP9|CLCN3|SLC23A1	-0.5423	1.2842	-1.6324
REP.A012_A549_24H:G07	BRD-A01636364	bupivacaine	A549	trt_cp	10 uM	24 h	3	157	0.2633	0.205592	0	0	1	1	0	Sodium channel inhibitor	SCN9A|KCNA5|PTGER1|SCN10A|SCN4A	-0.5422	1.2842	-1.6321
REP.B005_MCF7_24H:H08	BRD-K09372874	merimepodib	MCF7	trt_cp	0.74 uM	24 h	2	118	0.3583	0.207919	1	1	1	1	0	Inosine monophosphate dehydrogenase inhibitor	IMPDH1	-0.5417	1.2842	-1.6308
CPC016_NPC_24H:BRD-K14693417-001-03-2:10	BRD-K14693417	cinchonine	NPC	trt_cp	10 uM	24 h	4	220	0.11	0.157303	0	0	1	1	0	P-glycoprotein inhibitor	CYP2D6	-0.5418	1.2842	-1.6308
POL001_JURKAT_24H:P21	BRD-K97808269	BRD-K97808269	JURKAT	trt_cp	1.11 uM	24 h	3	98	0.19	0.137981	1	0	1	1	0	Glycolysis inhibitor	SLC2A1|SLC2A2|SLC2A3|SLC2A4	-0.5416	1.2842	-1.6304
LJP009_HUVEC_24H:P03	BRD-K68407802	KIN001-055	HUVEC	trt_cp	1.11 uM	24 h	3	379	0.6106	0.486439	1	1	1	1	0	EGFR inhibitor|JAK inhibitor|Leukotriene inhibitor|Mediator release inhibitor	JAK3	-0.5416	1.2842	-1.6302
CPC006_NCIH2073_6H:BRD-A02481876-001-09-9:60	BRD-A02481876	importazole	NCIH2073	trt_cp	60 uM	6 h	2	157	0.32	0.22665	0	0	1	1	0	Importin inhibitor	KPNB1	-0.5416	1.2842	-1.6302
REP.A009_MDAMB231_24H:A23	BRD-K28307902	flutamide	MDAMB231	trt_cp	0.125 uM	24 h	3	156	0.2738	0.208982	1	1	1	1	0	Androgen receptor antagonist	AR|CYP2C19|AHR	-0.5414	1.2842	-1.6297
CPC006_HA1E_6H:BRD-A81541225-001-02-7:10	BRD-A81541225	oligomycin-a	HA1E	trt_cp	10 uM	6 h	5	136	0.31	0.207626	1	1	1	1	0	ATP synthase inhibitor|ATPase inhibitor	ATP5A1	-0.5413	1.2842	-1.6293
CPC006_MCF7_6H:BRD-K73789395-001-06-5:102.71	BRD-K73789395	ZM-336372	MCF7	trt_cp	100 uM	6 h	5	352	0.5	0.424216	1	1	1	1	0	RAF inhibitor	BRAF|LCK|MAPK14|RAF1	-0.5412	1.2842	-1.6291
REP.A023_MDAMB231_24H:N14	BRD-A72066420	mifobate	MDAMB231	trt_cp	3.33 uM	24 h	2	59	0.3798	0.151368	1	1	1	1	0	PPAR receptor antagonist	PPARG|REN	-0.5412	1.2842	-1.629
LKCP002_U2OS_24H:M01	BRD-K19295594	gossypol	U2OS	trt_cp	10 uM	24 h	5	313	0.4135	0.363781	1	1	1	1	0	BCL inhibitor|MCL1 inhibitor	BCL2|BCL2L1|MCL1|BCL2L2|CTGF|EGF	-0.5411	1.2842	-1.6289
CPC006_NCIH2073_6H:BRD-K83213911-001-02-8:80	BRD-K83213911	PF-750	NCIH2073	trt_cp	80 uM	6 h	2	107	0.41	0.211794	0	0	1	1	0	FAAH inhibitor	FAAH	-0.5411	1.2842	-1.6289
CPC016_NEU_24H:BRD-K15868788-003-02-8:10	BRD-K15868788	SDZ-205-557	NEU	trt_cp	10 uM	24 h	3	77	0.02	0.0396818	0	0	1	1	0	Serotonin receptor antagonist	HTR4|HTR3A|HTR3B	-0.541	1.2842	-1.6285
REP.A021_THP1_24H:J11	BRD-K83837640	JNJ-26481585	THP1	trt_cp	0.125 uM	24 h	3	582	0.6619	0.627608	0	0	1	1	0	HDAC inhibitor	HDAC1|HDAC10|HDAC11|HDAC2|HDAC3|HDAC4|HDAC5|HDAC6|HDAC7|HDAC8|HDAC9|MDM2	-0.5409	1.2842	-1.6283
REP.A025_MCF10A_24H:K17	BRD-A82522119	tibolone	MCF10A	trt_cp	0.125 uM	24 h	3	148	0.4135	0.250149	1	1	1	1	0	Estrogen receptor agonist|Androgen receptor agonist|Progesterone receptor agonist	ESR1|AR|PGR|STS	-0.5409	1.2842	-1.6281
CPC006_HEPG2_6H:BRD-K69932463-001-03-1:10	BRD-K69932463	AZD-8055	HEPG2	trt_cp	10 uM	6 h	3	241	0.52	0.357965	1	1	1	1	0	MTOR inhibitor	MTOR	-0.5407	1.2842	-1.6278
LJP005_HT29_24H:D08	BRD-K63923597	barasertib-HQPA	HT29	trt_cp	3.33 uM	24 h	3	131	0.43	0.239994	1	1	1	1	0	Aurora kinase inhibitor	AURKB|AURKC|AURKA	-0.5407	1.2842	-1.6277
REP.B022_PC3_24H:M16	BRD-K72414522	AZD-5438	PC3	trt_cp	0.08 uM	24 h	2	102	0.312	0.180388	1	1	1	1	0	CDK inhibitor	CCNB1|CCNE1|CDK1|CDK2|KCNH2	-0.5406	1.2842	-1.6274
CPC006_HCT116_6H:BRD-K15108141-001-01-7:0.08	BRD-K15108141	gemcitabine	HCT116	trt_cp	0.08 uM	6 h	2	141	0.44	0.251864	1	0	1	1	0	Ribonucleoside reductase inhibitor	RRM1|CMPK1|RRM2|TYMS	-0.5406	1.2842	-1.6273
CPC017_HEPG2_6H:BRD-K02590140-001-01-2:10	BRD-K02590140	O-2050	HEPG2	trt_cp	10 uM	6 h	3	209	0.27	0.240207	1	0	1	1	0	Cannabinoid receptor antagonist	CNR1	-0.5406	1.2842	-1.6272
REP.B027_THP1_24H:K24	BRD-K97309399	thiothixene	THP1	trt_cp	0.01 uM	24 h	2	119	0.1316	0.126541	1	1	1	1	0	Dopamine receptor antagonist	HTR2A|DRD1|DRD2|HRH1	-0.5405	1.2842	-1.6269
LJP009_SKL_24H:L01	BRD-K70642949	GSK-2334470	SKL	trt_cp	10 uM	24 h	3	255	0.5566	0.380954	1	1	1	1	0	PDK inhibitor	PDPK1|AURKA|AURKB|PDK1	-0.5404	1.2842	-1.6267
CPC016_SKB_24H:BRD-K80778372-001-01-7:10	BRD-K80778372	Ro-19-4605	SKB	trt_cp	10 uM	24 h	3	144	0.03	0.0664619	1	0	1	1	0	GABA receptor agonist	GABRA1|GABRA2|GABRA3|GABRA5	-0.5404	1.2842	-1.6267
REP.B018_HT29_24H:J22	BRD-K64925568	AMG-232	HT29	trt_cp	0.08 uM	24 h	2	71	0.1954	0.119103	0	0	1	1	0	MDM inhibitor	MDM2	-0.5404	1.2842	-1.6266
CPC005_PC3_6H:BRD-A62057054-001-01-5:10	BRD-A62057054	MDL-11939	PC3	trt_cp	10 uM	6 h	4	127	0.16	0.144143	1	0	1	1	0	Serotonin receptor antagonist	HTR2A|HTR2B|HTR2C	-0.5401	1.2842	-1.6259
MOAR003_A375_24H:E13	BRD-K61536336	SB-366791	A375	trt_cp	10 uM	24 h	3	201	0.35	0.268202	1	1	1	1	0	TRPV antagonist	TRPV1	-0.54	1.2842	-1.6256
CPC012_NEU_24H:BRD-K74761218-001-03-5:10	BRD-K74761218	WT-171	NEU	trt_cp	10 uM	24 h	3	251	0.25	0.253301	0	0	1	1	0	HDAC inhibitor	HDAC6	-0.54	1.2842	-1.6254
CPC017_MCF7_24H:BRD-K04976539-001-01-0:10	BRD-K04976539	aminogenistein	MCF7	trt_cp	10 uM	24 h	5	293	0.32	0.309627	1	1	1	1	0	Src inhibitor	LCK	-0.5398	1.2842	-1.625
CPC004_VCAP_24H:H08	BRD-A26095496	clobetasol	VCAP	trt_cp	10 uM	24 h	6	161	0.24	0.198769	0	0	1	1	0	Glucocorticoid receptor agonist	NR3C1|PLA2G1B	-0.5397	1.2842	-1.6246
CPC017_ASC_24H:BRD-K89210380-001-03-8:10	BRD-K89210380	biotin	ASC	trt_cp	10 uM	24 h	4	260	0.41	0.330148	0	0	1	1	0	Vitamin B	ACACA|ACACB|HLCS|MCCC1|MCCC2|PC|PCCA|PCCB|SLC5A6	-0.5397	1.2842	-1.6246
CPC010_HCC515_6H:BRD-K08924299-003-04-6:10	BRD-K08924299	palonosetron	HCC515	trt_cp	10 uM	6 h	3	109	0.13	0.120369	1	0	1	1	0	Serotonin receptor antagonist	HTR3A	-0.5394	1.2842	-1.6238
CPC017_PHH_24H:BRD-K71499074-001-03-8:10	BRD-K71499074	diclofenamide	PHH	trt_cp	10 uM	24 h	3	207	0.17	0.189688	0	0	1	1	0	Carbonic anhydrase inhibitor	CA1|CA2|CA4|CA12|CA7	-0.5393	1.2842	-1.6233
ASG002_A549_24H:N14	BRD-K11636097	JNJ-7706621	A549	trt_cp	1.11 uM	24 h	3	178	0.4508	0.286439	1	1	1	1	0	CDK inhibitor	CDK1|CDK2|AURKA|AURKB	-0.5392	1.2842	-1.6232
CPD002_PC3_24H:BRD-A84465106-001-02-0:10	BRD-A84465106	nisoldipine	PC3	trt_cp	10 uM	24 h	3	209	0.41	0.296003	1	1	1	1	0	Calcium channel blocker	CACNA1C|CACNA1D|CACNA1S|CYP3A5|CACNA1F|CACNA2D1|CACNB2	-0.539	1.2842	-1.6226
MUC.CP008_MCF7_24H:H16	BRD-K30466858	ellagic-acid	MCF7	trt_cp	0.37 uM	24 h	3	83	0.21	0.133499	1	1	1	1	0	Glutathione transferase inhibitor|Aldose reductase inhibitor|Beta secretase inhibitor|HCV inhibitor|HIV inhibitor|Quorum sensing signaling modulator|Reverse transcriptase inhibitor	CA1|CA12|CA14|CA2|CA4|CA6|CA9|SYK|AKR1B1|BACE1|CA3|CA5A|CA5B|CA7|CSNK2A1|GSK3B|PRKACA|PRKCA|PRKCB|SQLE	-0.5388	1.2842	-1.622
PBIOA015_A375_24H:G19	BRD-K79877282	PF-543	A375	trt_cp	10 uM	24 h	3	175	0.27	0.219802	1	1	1	1	0	Sphingosine kinase inhibitor	SPHK1	-0.5388	1.2841	-1.6218
REP.B009_HELA_24H:P12	BRD-K34313798	LY-215490	HELA	trt_cp	0.01 uM	24 h	2	75	0.1778	0.116769	1	1	1	1	0	Glutamate receptor antagonist	GRIA1|GRIA2|GRIA3|GRIA4|GRIK1	-0.5386	1.2841	-1.6214
CPC014_HT29_6H:BRD-K73838513-003-01-4:10	BRD-K73838513	cinacalcet	HT29	trt_cp	10 uM	6 h	5	158	0.18	0.170528	0	0	1	1	0	Calcium channel activator	CASR	-0.5384	1.2834	-1.6207
REP.B022_HUVEC.A_24H:C04	BRD-K68103045	CGS-20625	HUVEC	trt_cp	0.08 uM	24 h	2	98	0.0599	0.0774742	0	0	1	1	0	Benzodiazepine receptor agonist	GABRA1|GABRA2|GABRA3|GABRA5|GABRA4|GABRA6	-0.5384	1.2831	-1.6206
CPC001_PC3_24H:I05	BRD-K92073408	BRD-K92073408	PC3	trt_cp	10 uM	24 h	5	154	0.0753	0.10889	1	0	1	1	0	Progestogen hormone|Progesterone receptor agonist	PGR	-0.5382	1.282	-1.6201
CPC014_SKB_24H:BRD-K05804044-001-01-1:10	BRD-K05804044	AZ-628	SKB	trt_cp	10 uM	24 h	4	233	0.3	0.267343	0	0	1	1	0	RAF inhibitor	BRAF|RAF1	-0.5381	1.2814	-1.6199
CPC014_SKB_24H:BRD-K98684188-001-01-1:10	BRD-K98684188	GSK-0660	SKB	trt_cp	10 uM	24 h	4	232	0.17	0.200816	0	0	1	1	0	PPAR receptor antagonist	PPARD	-0.5381	1.2807	-1.6197
REP.A009_MDAMB231_24H:J10	BRD-K30550578	PF-04620110	MDAMB231	trt_cp	0.37 uM	24 h	3	74	0.2058	0.124787	1	0	1	1	0	Diacylglycerol O acyltransferase inhibitor	DGAT1	-0.5381	1.2808	-1.6197
CPC018_PHH_24H:BRD-K77641333-003-15-6:10	BRD-K77641333	naphazoline	PHH	trt_cp	10 uM	24 h	3	95	0.03	0.0539825	0	0	1	1	0	Adrenergic receptor agonist	ADRA1A|ADRA2A	-0.538	1.2805	-1.6195
REP.A004_YAPC_24H:H21	BRD-K22822991	odanacatib	YAPC	trt_cp	1.11 uM	24 h	3	136	0.2398	0.18261	0	0	1	1	0	Cathepsin inhibitor	CTSK	-0.5379	1.2769	-1.6192
CPC002_HCC515_24H:BRD-K75615183-300-02-1:10	BRD-K75615183	talipexole	HCC515	trt_cp	10 uM	24 h	3	54	0.13	0.0847226	1	0	1	1	0	Adrenergic receptor agonist|Dopamine receptor agonist	DRD2|HTR3A|ADRA2A	-0.5379	1.2735	-1.6191
REP.B016_HEK293_24H:B24	BRD-K51324732	meglitinide	HEK293	trt_cp	0.01 uM	24 h	2	230	0.1589	0.193311	0	0	1	1	0	Potassium channel antagonist	ABCC8|KCNJ11|CCR2	-0.5374	1.2521	-1.6178
LJP008_NPC_24H:H07	BRD-K53328210	JW-55	NPC	trt_cp	10 uM	24 h	3	140	0.2212	0.177946	1	1	1	1	0	Tankyrase inhibitor	TNKS|TNKS2	-0.5374	1.2514	-1.6176
CPC006_AGS_6H:BRD-K62810658-001-06-4:10	BRD-K62810658	PD-98059	AGS	trt_cp	10 uM	6 h	2	87	0.29	0.160616	1	1	1	1	0	MEK inhibitor|MAP kinase inhibitor	MAP2K1|MAP2K2|MAPK3|AKT1|CHEK1|GSK3B|LCK|MAPK1|MAPK11|MAPK12|MAPK14|MAPK8|PRKCA|RAF1|ROCK1|RPS6KB1|SGK1	-0.5372	1.2496	-1.617
REP.B023_HT29_24H:M08	BRD-K71822263	D-serine	HT29	trt_cp	0.74 uM	24 h	2	127	0.3245	0.205277	1	1	1	1	0	Glutamate receptor agonist	GRIN1|GLRA1|GRIN2A|GRIN2B|GRIN2C|GRIN2D|SERPINB3	-0.5371	1.2494	-1.6169
CPC016_SKB_24H:BRD-K59522102-001-08-8:10	BRD-K59522102	piperine	SKB	trt_cp	10 uM	24 h	3	53	0.1	0.0736154	1	0	1	1	0	Monoamine oxidase inhibitor	MAOA|MAOB|TRPV1	-0.5371	1.2494	-1.6169
REP.B027_HA1E_24H:O16	BRD-A97739905	ketoprofen	HA1E	trt_cp	0.08 uM	24 h	2	68	0.1545	0.103645	1	1	1	1	0	Cyclooxygenase inhibitor	PTGS2|PTGS1|CXCR1|SLC5A8	-0.537	1.2488	-1.6165
CPC006_HEPG2_6H:BRD-A30655177-001-08-2:111.11	BRD-A30655177	LFM-A13	HEPG2	trt_cp	100 uM	6 h	3	113	0.21	0.155768	1	0	1	1	0	BTK inhibitor	BTK	-0.5369	1.2485	-1.6161
LIVB001_HUH7_72H:M17	BRD-K47936004	piribedil	HUH7	trt_cp	12 uM	72 h	3	113	0.04	0.0679829	0	0	1	1	0	Dopamine receptor agonist	DRD2|DRD3|ADRA2A|ADRA1A|ADRA2C|DRD4|HTR1A|HTR2B	-0.5369	1.2485	-1.6161
ABY001_SKBR3_XH:BRD-K70511574:10:24	BRD-K70511574	HMN-214	SKBR3	trt_cp	10 uM	24 h	3	204	0.44	0.302951	1	1	1	1	0	PLK inhibitor	FLT3|KDR|KIT|FLT4|PDGFRB|CSF1R|FLT1|RET|FGFR1|PDGFRA	-0.5369	1.2485	-1.6161
CPC006_PC3_24H:O01	BRD-K69328504	L-690488	PC3	trt_cp	10 uM	24 h	5	505	0.7114	0.606085	1	1	1	1	0	Inositol monophosphatase inhibitor	IMPA1	-0.5368	1.2482	-1.616
REP.B013_HEK293_24H:H01	BRD-A40084411	CGP-12177	HEK293	trt_cp	2.22 uM	24 h	2	90	0.2558	0.153427	1	1	1	1	0	Adrenergic receptor agonist	ADRB3|ADRB1|ADRB2	-0.5368	1.2478	-1.6159
CPC005_HCC515_6H:BRD-K77793136-003-02-2:10	BRD-K77793136	hydroxyfasudil	HCC515	trt_cp	10 uM	6 h	2	175	0.29	0.227797	1	1	1	1	0	Rho associated kinase inhibitor	ROCK1|ROCK2|PKIA|PRKACA	-0.5368	1.2477	-1.6158
CPC005_A375_24H:BRD-A65597028-003-02-4:10	BRD-A65597028	RX-821002	A375	trt_cp	10 uM	24 h	3	174	0.24	0.206638	1	0	1	1	0	Adrenergic receptor antagonist	ADRA2A|ADRA2B|ADRA2C|ADRA1A|ADRA1B|ADRA1D	-0.5367	1.247	-1.6156
CPC002_VCAP_6H:BRD-K49657628-001-05-6:10	BRD-K49657628	BRD-K49657628	VCAP	trt_cp	10 uM	6 h	4	271	0.45	0.353119	0	0	1	1	0	EGFR inhibitor|Tyrosine kinase inhibitor	EGFR	-0.5367	1.2466	-1.6155
MOAR016_HAP1.CDK4_24H:F03	BRD-K67537649	PQ-401	HAP1	trt_cp	3.33 uM	24 h	2	51	0.1557	0.0901073	1	1	1	1	0	IGF-1 inhibitor	IGF1R	-0.5366	1.2463	-1.6153
REP.B008_THP1_24H:A10	BRD-A68009927	daunorubicin	THP1	trt_cp	0.08 uM	24 h	2	165	0.5017	0.290934	1	1	1	1	0	RNA synthesis inhibitor|Topoisomerase inhibitor	TOP2A|TOP2B	-0.5364	1.2451	-1.6147
CPC001_HA1E_24H:BRD-K62221994-001-01-8:10	BRD-K62221994	T-98475	HA1E	trt_cp	10 uM	24 h	3	364	0.54	0.44831	1	1	1	1	0	Gonadotropin receptor antagonist	GNRHR	-0.5363	1.2446	-1.6143
CPC004_HCC515_6H:BRD-A91452556-001-03-2:10	BRD-A91452556	estradiol-cypionate	HCC515	trt_cp	10 uM	6 h	3	42	0.06	0.0507611	1	0	1	1	0	Estrogen receptor agonist	ESR1	-0.5361	1.2445	-1.6139
REP.A022_PC3_24H:F19	BRD-K70358946	aripiprazole	PC3	trt_cp	10 uM	24 h	2	107	0.3859	0.205475	1	1	1	1	0	Serotonin receptor agonist|Serotonin receptor antagonist	DRD2|HTR1A|HTR2A|HRH1|HTR1B|HTR1D|HTR2C|ADRA1A|ADRA1B|ADRA2A|ADRA2B|ADRA2C|CHRM1|CHRM2|CHRM3|CHRM4|CHRM5|DRD1|DRD3|DRD4|DRD5|HTR1E|HTR3A|HTR6|HTR7	-0.5361	1.2442	-1.6138
CPC015_A375_6H:BRD-A01643550-001-03-1:10	BRD-A01643550	prednisolone-acetate	A375	trt_cp	10 uM	6 h	3	157	0.42	0.25966	1	1	1	1	0	Glucocorticoid receptor agonist	NR3C1	-0.536	1.2437	-1.6133
PBIOA015_HEPG2_24H:J10	BRD-K71879491	tretinoin	HEPG2	trt_cp	0.37 uM	24 h	3	176	0.41	0.271631	1	1	1	1	0	Retinoid receptor agonist|Retinoid receptor ligand	RARG|RORB|RARA|RARB|ALDH1A1|ALDH1A2|GPRC5A|NR0B1|NR2C2|PPARD|RARRES1|RORC|RXRB|RXRG	-0.5358	1.2426	-1.6128
CPC006_PC3_24H:G11	BRD-K19295594	gossypol	PC3	trt_cp	12 uM	24 h	5	553	0.7767	0.662704	1	1	1	1	0	BCL inhibitor|MCL1 inhibitor	BCL2|BCL2L1|MCL1|BCL2L2|CTGF|EGF	-0.5357	1.2423	-1.6127
REP.B005_MCF7_24H:E12	BRD-K08859203	DU-728	MCF7	trt_cp	0.01 uM	24 h	2	101	0.0666	0.0829332	0	0	1	1	0	Structural glycoprotein antagonist	ITGA2B|ITGB3	-0.5355	1.2395	-1.612
CPC015_A375_6H:BRD-A09094913-001-03-1:10	BRD-A09094913	strychnine	A375	trt_cp	10 uM	6 h	3	131	0.29	0.19709	1	0	1	1	0	Acetylcholine receptor antagonist	GLRA1|CHRM1|CHRM2|CHRM3|CHRM4|CHRM5|CHRNA10|CHRNA9|GLRA2|GLRA3|GLRB	-0.5355	1.2393	-1.6119
REP.A003_HELA_3H:I08	BRD-K33852358	arofylline	HELA	trt_cp	3.33 uM	3 h	3	174	0.4411	0.280139	1	1	1	1	0	Phosphodiesterase inhibitor	PDE4A|PDE4B|PDE4C|PDE4D	-0.5352	1.2277	-1.611
CPC011_VCAP_24H:BRD-K57033106-003-15-5:10	BRD-K57033106	tripelennamine	VCAP	trt_cp	10 uM	24 h	5	264	0.34	0.302951	1	0	1	1	0	Histamine receptor antagonist	HRH1	-0.5349	1.2169	-1.6101
REP.A013_PC3_24H:M05	BRD-K42948882	AMD-11070	PC3	trt_cp	0.125 uM	24 h	2	153	0.3926	0.247829	0	0	1	1	0	CC chemokine receptor antagonist	CXCR4	-0.5348	1.2169	-1.61
LJP009_HEK293_24H:A21	BRD-A10523515	GSK-429286A	HEK293	trt_cp	1.11 uM	24 h	3	169	0.3098	0.231374	1	1	1	1	0	Rho associated kinase inhibitor	ROCK1	-0.5347	1.2169	-1.6094
LJP006_HS578T_3H:A14	BRD-K87909389	alvocidib	HS578T	trt_cp	3.33 uM	3 h	2	292	0.5827	0.417104	1	1	1	1	0	CDK inhibitor	CDK2|CDK4|CDK1|CDK6|CDK7|CDK9|CDK5|CDK8|EGFR|PYGM|BCL2|BIRC5|CCNT1|MCL1|XIAP	-0.5345	1.2169	-1.6089
REP.A001_HA1E_24H:J08	BRD-K28667793	pyrazinamide	HA1E	trt_cp	3.33 uM	24 h	3	112	0.2492	0.168933	1	1	1	1	0	Fatty acid synthase inhibitor	FASN	-0.5344	1.2169	-1.6085
REP.A003_A549_24H:H01	BRD-A33168282	sotalol	A549	trt_cp	10 uM	24 h	3	101	0.1066	0.104923	0	0	1	1	0	Adrenergic receptor antagonist	ADRB1|ADRB2|KCNH2	-0.5343	1.2169	-1.6083
REP.A016_MDAMB231_24H:L03	BRD-K54847683	equol	MDAMB231	trt_cp	1.11 uM	24 h	3	151	0.1926	0.172444	1	1	1	1	0	Estrogen receptor agonist	ESR2|ESR1	-0.5342	1.2169	-1.608
CPC018_SKB_24H:BRD-K54233340-001-02-2:10	BRD-K54233340	dorsomorphin	SKB	trt_cp	10 uM	24 h	3	163	0.21	0.187083	1	1	1	1	0	AMPK inhibitor	ACVR1|BMPR1A|BMPR1B|EPHA2|FKBP1A|FLT1|FLT3|KDR|LCK|MKNK1|PRKAA1|RPS6KA1|SRC	-0.534	1.2169	-1.6076
ASG003_U2OS_24H:K20	BRD-K63750851	BRD-K63750851	U2OS	trt_cp	1.11 uM	24 h	5	173	0.3379	0.244482	0	0	1	1	0	Dehydrogenase inhibitor|Inositol monophosphatase inhibitor	IMPDH1|IMPDH2	-0.534	1.2169	-1.6075
EMU001_SKMEL5_24H:O12	BRD-K64034691	acalabrutinib	SKMEL5	trt_cp	0.01 uM	24 h	3	185	0.2432	0.214486	1	0	1	1	0	BTK inhibitor	BTK	-0.5339	1.2169	-1.6073
PBIOA021_HT29_24H:F24	BRD-K22024824	RG-4733	HT29	trt_cp	0.04 uM	24 h	3	159	0.24	0.197531	1	1	1	1	0	Gamma secretase inhibitor	NOTCH1|PSEN1	-0.5338	1.2169	-1.607
CPC003_PC3_24H:BRD-A65449987-001-06-2:10	BRD-A65449987	flunisolide	PC3	trt_cp	10 uM	24 h	5	118	0.24	0.170168	1	1	1	1	0	Cytochrome P450 inhibitor	NR3C1	-0.5336	1.2169	-1.6062
CPD002_PC3_6H:BRD-A57133233-003-08-6:10	BRD-A57133233	chlorcyclizine	PC3	trt_cp	10 uM	6 h	3	130	0.09	0.109376	0	0	1	1	0	Histamine receptor antagonist	HRH1	-0.5335	1.2169	-1.6059
PBIOA018_HA1E_24H:J02	BRD-K93918653	quizartinib	HA1E	trt_cp	3.33 uM	24 h	3	207	0.41	0.294583	1	1	1	1	0	FLT3 inhibitor	FLT3|CSF1R|KIT|RET|PDGFRA|PDGFRB	-0.5333	1.2169	-1.6053
REP.A024_PC3_24H:B21	BRD-K73794685	azithromycin	PC3	trt_cp	1.11 uM	24 h	3	91	0.1822	0.130204	1	0	1	1	0	Bacterial 50S ribosomal subunit inhibitor	MLNR	-0.5329	1.2169	-1.604
CPC013_MCF7_6H:BRD-K64881305-001-01-1:10	BRD-K64881305	ispinesib	MCF7	trt_cp	10 uM	6 h	4	332	0.45	0.390846	1	1	1	1	0	Kinesin inhibitor	KIF11	-0.5328	1.2169	-1.6039
CPC016_NEU_24H:BRD-K31238592-001-01-6:10	BRD-K31238592	devazepide	NEU	trt_cp	10 uM	24 h	3	102	0.29	0.173912	0	0	1	1	0	CCK receptor antagonist	CCKAR	-0.5328	1.2169	-1.6039
CPC006_NCIH2073_6H:BRD-K27316855-001-02-6:1	BRD-K27316855	calcitriol	NCIH2073	trt_cp	1.11 uM	6 h	2	68	0.35	0.155998	0	0	1	1	0	Vitamin D receptor agonist	VDR|CYP3A5	-0.5327	1.2169	-1.6036
CPC006_HCC515_6H:F13	BRD-A04352665	maraviroc	HCC515	trt_cp	10 uM	6 h	3	120	0.3648	0.211567	1	1	1	1	0	CC chemokine receptor antagonist	CCR5|CYP3A5	-0.5327	1.2169	-1.6035
CPC018_SKB_24H:BRD-K09132007-001-01-8:10	BRD-K09132007	D-4476	SKB	trt_cp	10 uM	24 h	3	102	0.25	0.161473	1	1	1	1	0	TGF-beta receptor inhibitor	CSNK1A1|CSNK1D|TGFB1	-0.5325	1.2169	-1.6031
REP.B013_A375_24H:E03	BRD-K38436528	imipramine	A375	trt_cp	0.25 uM	24 h	2	88	0.2165	0.139573	0	0	1	1	0	Norepinephrine inhibitor|Serotonin reuptake inhibitor	SLC6A2|SLC6A4|CHRM2|CYP2C19|ADRA1A|ADRA1B|ADRA1D|CHRM1|CHRM3|CHRM4|CHRM5|DRD1|DRD2|DRD5|HRH1|HTR1A|HTR2A|HTR2C|HTR6|HTR7|KCND2|KCND3|KCNH1|KCNH2|SLC6A3	-0.5325	1.2169	-1.603
CPC006_SW480_6H:BRD-A12230535-001-02-6:44.4	BRD-A12230535	nutlin-3	SW480	trt_cp	40 uM	6 h	2	71	0.06	0.0659987	0	0	1	1	0	MDM inhibitor	MDM2|TP53	-0.5325	1.2169	-1.6028
CPD002_PC3_24H:BRD-K71696703-001-04-6:10	BRD-K71696703	triflusal	PC3	trt_cp	10 uM	24 h	3	52	0.09	0.0691757	1	0	1	1	0	Cyclooxygenase inhibitor|Platelet aggregation inhibitor|Thromboxane synthase inhibitor	PTGS1|PDE4A|PDE4B|PDE4C|PDE4D|PTGS2|NFKB1|NOS2|PDE10A	-0.5324	1.2169	-1.6027
CPC015_SKB_24H:BRD-K28936863-051-18-1:10	BRD-K28936863	ketotifen	SKB	trt_cp	10 uM	24 h	2	51	0.05	0.0510623	0	0	1	1	0	Histamine receptor agonist|Leukotriene receptor antagonist|Phosphodiesterase inhibitor	HRH1|PDE4A|PDE4B|PDE4C|PDE4D|PDE7A|PDE7B|PDE8A|PDE8B|PGD	-0.5323	1.2169	-1.6023
REP.B021_HA1E_24H:H08	BRD-K82846253	repaglinide	HA1E	trt_cp	0.74 uM	24 h	2	53	0.1382	0.0865411	1	1	1	1	0	Insulin secretagogue	ABCC8|KCNJ11|CYP2C8|CYP3A5|INS|PPARG	-0.5323	1.2169	-1.6022
CPC006_HT29_24H:BRD-K06593056-001-02-2:20	BRD-K06593056	LE-135	HT29	trt_cp	20 uM	24 h	4	246	0.54	0.368549	1	1	1	1	0	Retinoid receptor agonist	RARB	-0.5323	1.2169	-1.6022
REP.A010_A549_24H:I08	BRD-K13756951	bitopertin	A549	trt_cp	3.33 uM	24 h	3	215	0.3504	0.277544	1	1	1	1	0	Glycine transporter inhibitor	SLC6A9|SLC6A5	-0.5322	1.2169	-1.6019
PBIOA019_MCF7_24H:L01	BRD-K93442924	voapaxar	MCF7	trt_cp	10 uM	24 h	3	245	0.55	0.371189	1	1	1	1	0	Thrombin inhibitor	F2R	-0.5321	1.2169	-1.6018
REP.A023_HELA_24H:K19	BRD-K71106091	fludarabine-phosphate	HELA	trt_cp	10 uM	24 h	2	137	0.4246	0.243883	1	1	1	1	0	DNA inhibitor|DNA repair enzyme inhibitor|Purine antagonist	POLA1|RRM1|DCK|POLD1|POLE|RRM2|RRM2B	-0.532	1.2169	-1.6015
CPC002_HA1E_24H:BRD-K82983861-001-01-9:10	BRD-K82983861	GW-0742	HA1E	trt_cp	10 uM	24 h	3	94	0.3	0.169807	1	0	1	1	0	PPAR receptor agonist|Insulin sensitizer	PPARD|INS	-0.532	1.2169	-1.6013
CPC001_PC3_24H:A05	BRD-K81709173	halcinonide	PC3	trt_cp	10 uM	24 h	5	227	0.1854	0.207443	1	0	1	1	0	Glucocorticoid receptor agonist	NR3C1	-0.5318	1.2169	-1.6007
REP.B017_MCF10A_24H:O11	BRD-K64874225	NSC-4644	MCF10A	trt_cp	0.01 uM	24 h	2	56	0.1719	0.0992116	1	1	1	1	0	ACAT inhibitor|Sterol regulatory element binding protein (SREBP) inhibitor	SOAT1|PYGM	-0.5316	1.2169	-1.6003
REP.B020_HELA_24H:D19	BRD-K84996356	AZD-3514	HELA	trt_cp	2.22 uM	24 h	2	128	0.3196	0.204521	1	1	1	1	0	Drugs Acting on Androgen Receptor	AR	-0.5316	1.2169	-1.6003
LJP009_HUVEC_24H:A23	BRD-A10523515	GSK-429286A	HUVEC	trt_cp	0.12 uM	24 h	3	149	0.1609	0.156568	1	1	1	1	0	Rho associated kinase inhibitor	ROCK1	-0.5316	1.2169	-1.6002
MOAR007_PC3_24H:N16	BRD-K79905821	gabazine	PC3	trt_cp	10 uM	24 h	3	114	0.17	0.140769	1	0	1	1	0	GABA receptor antagonist	GABRA1|GABRA2|GABRA3|GABRA4|GABRA5|GABRA6|GABRG2	-0.5315	1.2169	-1.6001
REP.B024_A375_24H:B22	BRD-K73794685	azithromycin	A375	trt_cp	0.08 uM	24 h	2	207	0.269	0.238612	1	1	1	1	0	Bacterial 50S ribosomal subunit inhibitor	MLNR	-0.5315	1.2169	-1.6
CPC004_VCAP_6H:BRD-A29734509-011-06-0:10	BRD-A29734509	disopyramide	VCAP	trt_cp	10 uM	6 h	4	121	0.32	0.198975	1	0	1	1	0	Sodium channel inhibitor	SCN5A|CHRM1|CHRM2|CHRM3|KCND2|KCND3|KCNH2	-0.5314	1.2169	-1.5996
ASG003_A549_48H:K01	BRD-K88560311	rucaparib	A549	trt_cp	10 uM	48 h	5	441	0.5669	0.505595	1	1	1	1	0	PARP inhibitor	PARP1|PARP2	-0.5314	1.2169	-1.5996
REP.A014_MCF7_24H:E17	BRD-K58501140	TAK-875	MCF7	trt_cp	0.125 uM	24 h	3	99	0.2137	0.147079	1	1	1	1	0	Insulin secretagogue	FFAR1|INS	-0.5314	1.2169	-1.5995
CPC005_HT29_24H:BRD-K38251852-001-06-6:10	BRD-K38251852	paxilline	HT29	trt_cp	10 uM	24 h	3	139	0.34	0.219825	1	1	1	1	0	Potassium channel antagonist	KCNMA1	-0.5313	1.2169	-1.5994
CPC010_VCAP_6H:BRD-A04327189-001-11-0:10	BRD-A04327189	synephrine	VCAP	trt_cp	10 uM	6 h	5	320	0.21	0.262129	1	0	1	1	0	Adrenergic receptor agonist	ADRA1A	-0.5312	1.2169	-1.5991
CPC014_PHH_24H:BRD-K64857848-001-02-3:10	BRD-K64857848	XMD-885	PHH	trt_cp	10 uM	24 h	4	261	0.27	0.268431	0	0	1	1	0	MAP kinase inhibitor	MAPK7|LRRK2	-0.5311	1.2169	-1.5988
REP.B011_MDAMB231_24H:C01	BRD-A04352665	maraviroc	MDAMB231	trt_cp	2.22 uM	24 h	2	137	0.1826	0.159934	0	0	1	1	0	CC chemokine receptor antagonist	CCR5|CYP3A5	-0.531	1.2169	-1.5984
REP.A026_A375_24H:E07	BRD-A89164055	sorbinil	A375	trt_cp	10 uM	24 h	3	138	0.1046	0.121489	0	0	1	1	0	Aldose reductase inhibitor	AKR1B1	-0.5309	1.2169	-1.5982
LJP008_YAPC_24H:G21	BRD-K03406345	azacitidine	YAPC	trt_cp	1.11 uM	24 h	2	26	0.2287	0.0779741	1	1	1	1	0	DNA inhibitor	DNMT1|DNMT3A	-0.5309	1.2169	-1.5982
REP.B004_HT29_24H:O09	BRD-A26384407	chlortalidone	HT29	trt_cp	0.25 uM	24 h	2	121	0.2633	0.180488	0	0	1	1	0	Carbonic anhydrase inhibitor	CA7|CA1|CA12|CA14|CA4|SLC12A1|SLC12A3	-0.5307	1.2169	-1.5976
REP.A023_HEK293_24H:P18	BRD-K73088654	floxuridine	HEK293	trt_cp	0.04 uM	24 h	3	366	0.6204	0.481845	1	1	1	1	0	DNA synthesis inhibitor	TYMS	-0.5307	1.2169	-1.5974
REP.B013_MDAMB231_24H:I15	BRD-K41434598	ORG-9768	MDAMB231	trt_cp	0.25 uM	24 h	2	162	0.2274	0.194081	0	0	1	1	0	Adrenergic receptor antagonist	SLC6A2|ADRA2A	-0.5306	1.2169	-1.5973
REP.A028_PC3_24H:G19	BRD-K94397152	ribavirin	PC3	trt_cp	10 uM	24 h	2	153	0.2786	0.208769	0	0	1	1	0	Antiviral	IMPDH1|ADK|ENPP1|IMPDH2|NT5C2	-0.5306	1.2169	-1.5973
REP.A015_HT29_24H:F20	BRD-K57169635	dacomitinib	HT29	trt_cp	3.33 uM	24 h	3	138	0.3428	0.219933	1	1	1	1	0	EGFR inhibitor	EGFR|ERBB2|ERBB4	-0.5304	1.2169	-1.5967
CPC004_MCF7_6H:BRD-A90131694-001-02-8:10	BRD-A90131694	alclometasone	MCF7	trt_cp	10 uM	6 h	4	134	0.15	0.14336	1	0	1	1	0	Glucocorticoid receptor agonist	NR3C1|CYP3A4|SERPINA6	-0.5304	1.2169	-1.5965
REP.A002_A375_24H:C16	BRD-K16133773	BRD-K16133773	A375	trt_cp	0.37 uM	24 h	3	85	0.2515	0.147846	1	0	1	1	0	17,20 lyase inhibitor|Cytochrome P450 inhibitor|Steroid sulfatase inhibitor|Androgen biosynthesis inhibitor	CYP17A1|CYP2C19|CYP2C8|CYP3A5	-0.5304	1.2169	-1.5965
REP.A015_HEK293_24H:P07	BRD-A61221616	medroxyprogesterone-acetate	HEK293	trt_cp	10 uM	24 h	2	103	0.079	0.0912143	1	1	1	1	0	Progesterone receptor agonist	PGR	-0.5303	1.2169	-1.5962
CPC005_HT29_6H:BRD-K46862739-001-03-6:10	BRD-K46862739	metyrapone	HT29	trt_cp	10 uM	6 h	3	42	0.24	0.101522	1	1	1	1	0	Cytochrome P450 inhibitor	CYP11B1|HSD11B1|NR3C2	-0.5302	1.2169	-1.5959
REP.B027_A549_24H:M19	BRD-K99545815	PF-562271	A549	trt_cp	2.22 uM	24 h	2	123	0.2363	0.172391	0	0	1	1	0	Focal adhesion kinase inhibitor	PTK2|PTK2B	-0.5302	1.2169	-1.5959
LJP007_MDAMB231_24H:A08	BRD-K64857848	XMD-885	MDAMB231	trt_cp	3.33 uM	24 h	2	184	0.4378	0.286997	1	1	1	1	0	MAP kinase inhibitor	MAPK7|LRRK2	-0.5302	1.2169	-1.5959
REP.A009_MCF7_24H:G02	BRD-K30563334	rifabutin	MCF7	trt_cp	3.33 uM	24 h	2	47	0.1875	0.0949249	0	0	1	1	0	Bacterial protein synthesis inhibitor	CYP3A4|HSP90AA1|HSP90B1	-0.53	1.2169	-1.5955
CPC002_HCC515_24H:BRD-K15567136-003-18-1:10	BRD-K15567136	papaverine	HCC515	trt_cp	10 uM	24 h	3	114	0.29	0.183858	1	0	1	1	0	Phosphodiesterase inhibitor	PDE10A|PDE4B|PDE5A	-0.5299	1.2169	-1.5952
CPC004_PC3_24H:BRD-A55416093-001-03-1:10	BRD-A55416093	colforsin	PC3	trt_cp	10 uM	24 h	5	241	0.3	0.271894	0	0	1	1	0	Adenylyl cyclase activator	ADCY2|ADCY5	-0.5299	1.2169	-1.595
CPC005_A375_24H:BRD-K40227168-001-06-1:10	BRD-K40227168	vinburnine	A375	trt_cp	10 uM	24 h	3	171	0.31	0.232814	1	1	1	1	0	Adrenergic receptor antagonist	CHRM1|CHRM2|CHRM3|CHRM4	-0.5298	1.2169	-1.5949
CPC016_SKB_24H:BRD-K94689771-001-02-5:10	BRD-K94689771	pinocembrin	SKB	trt_cp	10 uM	24 h	3	83	0.17	0.120114	1	0	1	1	0	CYP1B1 inhibitor	AR|SRD5A1|SRD5A2|CYP1B1	-0.5298	1.2169	-1.5947
REP.A002_MCF7_24H:A23	BRD-A15909516	rebamipide	MCF7	trt_cp	0.125 uM	24 h	3	149	0.2105	0.179081	0	0	1	1	0	Free radical scavenger	FPR1	-0.5298	1.2169	-1.5947
AICHI002_OCILY3_24H:F01	BRD-K01436366	XMD-1150	OCILY3	trt_cp	10 uM	24 h	3	494	0.7331	0.608521	1	1	1	1	0	LRRK inhibitor	LRRK2	-0.5297	1.2169	-1.5946
REP.A015_MDAMB231_24H:K13	BRD-K59332007	linopirdine	MDAMB231	trt_cp	10 uM	24 h	2	95	0.4873	0.217566	1	1	1	1	0	Potassium channel antagonist	KCNQ2|KCNQ3|KCNQ4|KCNQ5	-0.5297	1.2169	-1.5945
LIVB002_HUH7_72H:A19	BRD-A45664787	iloprost	HUH7	trt_cp	10 uM	72 h	3	100	0.14	0.119645	0	0	1	1	0	Platelet aggregation inhibitor|Prostanoid receptor agonist	PTGIR|PTGER1|PTGER2|PDE4A|PDE4B|PDE4C|PDE4D|PLAT|PTGDR|PTGER3|PTGER4|PTGFR|TBXA2R	-0.5296	1.2169	-1.5942
REP.B018_A549_24H:K17	BRD-K65678996	nefiracetam	A549	trt_cp	0.03 uM	24 h	2	93	0.1639	0.124842	0	0	1	1	0	Acetylcholine receptor agonist|GABA receptor agonist	CHAT|CHRM1	-0.5296	1.2169	-1.5942
PAC004_U2OS_6H:BRD-K11911061-003-02-8:10	BRD-K11911061	GR-127935	U2OS	trt_cp	10 uM	6 h	2	86	0.43	0.194453	1	1	1	1	0	Serotonin receptor antagonist	HTR1B|HTR1D|HTR1A|HTR2A|HTR2C|HTR1E|HTR1F|HTR2B|HTR6	-0.5296	1.2169	-1.5941
AICHI001_OCILY19_24H:D20	BRD-K16761703	sotrastaurin	OCILY19	trt_cp	2.5 uM	24 h	3	246	0.56	0.375312	1	1	1	1	0	PKC inhibitor	PRKCA|PRKCB|PRKCQ|PRKCD|PRKCE|PRKCH	-0.5294	1.2169	-1.5935
REP.A024_HA1E_24H:D14	BRD-K74339692	tamsulosin	HA1E	trt_cp	3.33 uM	24 h	3	477	0.3689	0.424174	1	1	1	1	0	Adrenergic receptor antagonist	ADRA1A|ADRA1B|ADRA1D	-0.5293	1.2169	-1.5934
AICHI001_OCILY10_24H:B21	BRD-K12343256	trametinib	OCILY10	trt_cp	0.66 uM	24 h	2	42	0.2934	0.11225	0	0	1	1	0	MEK inhibitor	MAP2K1|MAP2K2|CYP2C8|CYP3A4	-0.5292	1.2169	-1.593
REP.B018_MCF10A_24H:I17	BRD-K64838454	dipraglurant	MCF10A	trt_cp	0.03 uM	24 h	2	223	0.4084	0.305159	1	1	1	1	0	Glutamate receptor antagonist	GRM5	-0.5292	1.2169	-1.5929
MOAR006_A375_24H:I24	BRD-K22477529	STF-31	A375	trt_cp	1.11 uM	24 h	3	267	0.53	0.380386	1	1	1	1	0	NAMPT inhibitor	NAMPT|SLC2A1	-0.5292	1.2169	-1.5929
PBIOA022_MCF7_24H:A24	BRD-K80021413	ML-204	MCF7	trt_cp	0.04 uM	24 h	3	165	0.23	0.196986	1	1	1	1	0	Transient receptor potential channel antagonist	TRPC4|TRPC5	-0.5289	1.2169	-1.592
REP.A019_A549_24H:N24	BRD-K50031829	PF-04447943	A549	trt_cp	0.04 uM	24 h	2	114	0.1773	0.14376	0	0	1	1	0	Phosphodiesterase inhibitor	PDE9A	-0.5287	1.2169	-1.5916
MOAR006_A375_24H:J05	BRD-K86718786	SGC-707	A375	trt_cp	3.33 uM	24 h	3	132	0.3	0.201223	1	1	1	1	0	PRMT inhibitor	PRMT3	-0.5287	1.2169	-1.5914
LKCP002_MCF7_48H:P07	BRD-K43586850	lacidipine	MCF7	trt_cp	10 uM	48 h	5	262	0.42	0.335433	1	1	1	1	0	Calcium channel blocker	CACNA1C	-0.5286	1.2169	-1.5911
CPC017_MCF7_6H:BRD-A43930669-003-01-0:10	BRD-A43930669	L-368899	MCF7	trt_cp	10 uM	6 h	4	145	0.35	0.227797	1	0	1	1	0	Oxytocin receptor antagonist	OXTR|OXT|AVPR1A|AVPR2	-0.5284	1.2169	-1.5905
REP.A016_MDAMB231_24H:P01	BRD-K52618540	inositol	MDAMB231	trt_cp	10 uM	24 h	3	232	0.254	0.245466	1	1	1	1	0	Insulin sensitizer	CDIPT|GBA	-0.5283	1.2169	-1.5903
CPC005_A549_24H:BRD-K53263234-001-02-9:10	BRD-K53263234	CITCO	A549	trt_cp	10 uM	24 h	3	51	0.17	0.0941543	1	0	1	1	0	CAR agonist	NR1I3	-0.5283	1.2169	-1.5903
CPC003_HCC515_24H:BRD-K13926615-003-02-5:10	BRD-K13926615	vardenafil	HCC515	trt_cp	10 uM	24 h	3	74	0.21	0.126054	1	0	1	1	0	Phosphodiesterase inhibitor	PDE5A|CYP2C19|CYP2C8|CYP3A5|PDE6G|PDE6H	-0.5282	1.2169	-1.59
CPC010_A549_6H:BRD-K18816859-002-04-6:10	BRD-K18816859	L-694247	A549	trt_cp	10 uM	6 h	2	82	0.08	0.0818997	1	0	1	1	0	Serotonin receptor agonist	HTR1D|HTR1A|HTR1B	-0.5282	1.2169	-1.5899
CPC004_PC3_24H:BRD-K39733634-001-01-8:10	BRD-K39733634	L-161982	PC3	trt_cp	10 uM	24 h	5	178	0.12	0.147785	0	0	1	1	0	Prostanoid receptor antagonist	PTGER4	-0.5282	1.2169	-1.5899
MOAR007_PC3_24H:G07	BRD-K13474508	L-655708	PC3	trt_cp	10 uM	24 h	3	94	0.1	0.098038	1	0	1	1	0	GABA receptor antagonist	GABRA5|GABRA1|GABRA2|GABRA3|GABRG2	-0.5281	1.2169	-1.5896
REP.B007_HELA_24H:L12	BRD-K53765467	empagliflozin	HELA	trt_cp	0.01 uM	24 h	2	103	0.3074	0.179929	0	0	1	1	0	Sodium channel inhibitor	SLC5A2|SLC5A1	-0.528	1.2169	-1.5895
CPC014_MCF7_24H:BRD-K64935403-001-01-6:10	BRD-K64935403	ebelactone-b	MCF7	trt_cp	10 uM	24 h	3	64	0.21	0.117228	1	0	1	1	0	Lipase inhibitor	PNLIP	-0.5279	1.2169	-1.5889
PAC001_U2OS_6H:BRD-K62310379-001-03-0:3.99544	BRD-K62310379	fluticasone-propionate	U2OS	trt_cp	4 uM	6 h	2	122	0.27	0.183524	0	0	1	1	0	Glucocorticoid receptor agonist	NR3C1|PGR|CYP3A5|CYP3A7|NR3C2|PLA2G4A	-0.5277	1.2169	-1.5885
CPC006_NCIH596_6H:BRD-A73680854-001-01-3:10	BRD-A73680854	PT-630	NCIH596	trt_cp	10 uM	6 h	2	101	0.13	0.115868	1	0	1	1	0	Dipeptidyl peptidase inhibitor	DPP4	-0.5276	1.2169	-1.5883
LKCP001_A549_48H:H01	BRD-A81513827	saxagliptin	A549	trt_cp	10 uM	48 h	4	106	0.2056	0.149278	0	0	1	1	0	Dipeptidyl peptidase inhibitor	DPP4|CYP3A5	-0.5275	1.2169	-1.588
CPC005_HCC515_6H:BRD-A19736161-003-03-0:10	BRD-A19736161	ondansetron	HCC515	trt_cp	10 uM	6 h	2	91	0.05	0.0682082	1	0	1	1	0	Serotonin receptor antagonist	HTR3A|CYP2D6|CYP3A5|HTR1A|HTR1B|HTR3B|HTR4|OPRM1	-0.5275	1.2169	-1.5878
CPC018_MCF7_6H:BRD-K32164935-001-17-5:10	BRD-K32164935	tolazamide	MCF7	trt_cp	10 uM	6 h	3	74	0.24	0.134757	1	1	1	1	0	ATP channel blocker	ABCC8|KCNJ1|KCNJ10|KCNJ11	-0.5274	1.2169	-1.5877
REP.B025_HT29_24H:O17	BRD-A80017228	bendroflumethiazide	HT29	trt_cp	0.03 uM	24 h	2	111	0.1714	0.139475	0	0	1	1	0	Sodium channel inhibitor	SLC12A3|CA1|CA2|CA4|KCNMA1|SLC12A1	-0.5273	1.2169	-1.5872
REP.A002_A375_24H:K13	BRD-K17561142	amiodarone	A375	trt_cp	10 uM	24 h	3	265	0.5126	0.372686	1	1	1	1	0	Potassium channel antagonist	KCNH2|CHRM3|CYP2C8|SCN5A|ADRB1|CACNA1H|CACNA2D2|KCNA7	-0.5272	1.2169	-1.587
CPC005_A375_24H:BRD-A33168282-003-06-5:10	BRD-A33168282	sotalol	A375	trt_cp	10 uM	24 h	3	186	0.29	0.234848	1	1	1	1	0	Adrenergic receptor antagonist	ADRB1|ADRB2|KCNH2	-0.5272	1.2169	-1.5869
REP.B020_THP1_24H:G08	BRD-K80082640	otamixaban	THP1	trt_cp	0.74 uM	24 h	2	114	0.1254	0.120902	0	0	1	1	0	Coagulation factor inhibitor	F10	-0.5271	1.2169	-1.5866
LJP009_MCF10A_24H:H10	BRD-K09951645	dabrafenib	MCF10A	trt_cp	0.37 uM	24 h	2	181	0.5317	0.313692	1	1	1	1	0	RAF inhibitor	BRAF|CYP2B6|CYP2C19|CYP2C8|CYP3A4|LIMK1|NEK11|RAF1|SIK1	-0.527	1.2169	-1.5862
LJP006_HA1E_24H:L07	BRD-A45498368	WYE-125132	HA1E	trt_cp	10 uM	24 h	3	398	0.76	0.556133	1	1	1	1	0	MTOR inhibitor	MTOR|PIK3CA	-0.5268	1.2167	-1.5857
REP.A001_A549_24H:I19	BRD-K28761891	ramelteon	A549	trt_cp	10 uM	24 h	2	69	0.0885	0.0790181	0	0	1	1	0	Melatonin receptor agonist	MTNR1A|MTNR1B	-0.5267	1.2166	-1.5856
CPC014_PHH_24H:BRD-K37130656-001-01-2:10	BRD-K37130656	rivaroxaban	PHH	trt_cp	10 uM	24 h	4	104	0.04	0.0652195	0	0	1	1	0	Coagulation factor inhibitor	F10|CYP2J2|CYP3A5	-0.5266	1.216	-1.5853
CPC006_HCC515_24H:K19	BRD-K26657438	imiquimod	HCC515	trt_cp	10 uM	24 h	5	95	0.1238	0.109661	1	0	1	1	0	Interferon inducer|TLR agonist	TLR7|TLR8	-0.5264	1.2054	-1.5847
LCP001_MCF10A.WT_24H:F18	BRD-K62814476	BMS-265246	MCF10A	trt_cp	1.11 uM	24 h	3	127	0.52	0.259857	1	1	1	1	0	CDK inhibitor	CDK1|CDK2|CCNE1	-0.5263	1.2052	-1.5844
REP.A002_HELA_24H:H13	BRD-K16803204	filgotinib	HELA	trt_cp	10 uM	24 h	3	189	0.4713	0.301794	1	1	1	1	0	JAK inhibitor	JAK1|JAK2|JAK3|TYK2	-0.5263	1.2052	-1.5843
CPC014_PHH_24H:BRD-K68174511-001-01-7:10	BRD-K68174511	torin-2	PHH	trt_cp	10 uM	24 h	4	252	0.35	0.300307	0	0	1	1	0	MTOR inhibitor	MTOR	-0.5262	1.2052	-1.5841
CPC016_A375_6H:BRD-K34995470-001-02-3:10	BRD-K34995470	SU-1498	A375	trt_cp	10 uM	6 h	5	104	0.08	0.0922343	1	0	1	1	0	VEGFR inhibitor	ERBB2	-0.526	1.2052	-1.5835
CPC004_HA1E_24H:BRD-A26384407-001-15-2:10	BRD-A26384407	chlortalidone	HA1E	trt_cp	10 uM	24 h	3	135	0.36	0.22292	1	1	1	1	0	Carbonic anhydrase inhibitor	CA7|CA1|CA12|CA14|CA4|SLC12A1|SLC12A3	-0.5259	1.2052	-1.5832
ENR001_MCF7_24H:H21	BRD-K05878375	sodium-butyrate	MCF7	trt_cp	1.11 uM	24 h	3	160	0.2	0.180886	1	0	1	1	0	HDAC inhibitor	HDAC1|BCHE|FFAR2|FFAR3|HDAC2|HDAC3|HDAC8	-0.5259	1.2052	-1.5831
CPC017_SKB_24H:BRD-A42553870-001-05-1:10	BRD-A42553870	L-152804	SKB	trt_cp	10 uM	24 h	2	41	0.12	0.0709273	0	0	1	1	0	Neuropeptide receptor antagonist	NPY5R	-0.5259	1.2052	-1.583
LJP008_HEK293_24H:P10	BRD-K26756394	VE-821	HEK293	trt_cp	0.37 uM	24 h	2	96	0.1936	0.137854	1	1	1	1	0	ATR kinase inhibitor	ATR	-0.5258	1.2052	-1.5828
LJP009_CD34_24H:E15	BRD-K02123250	JNJ-38877605	CD34	trt_cp	1.11 uM	24 h	3	77	0.1629	0.11325	1	0	1	1	0	MET inhibitor	MET	-0.5257	1.2052	-1.5826
CPC015_SKB_24H:BRD-K56558538-003-02-8:10	BRD-K56558538	ambroxol	SKB	trt_cp	10 uM	24 h	2	220	0.51	0.338709	0	0	1	1	0	Sodium channel inhibitor	GBA|CYP3A4	-0.5257	1.2052	-1.5824
REP.A001_HA1E_24H:B13	BRD-A25234499	aminoglutethimide	HA1E	trt_cp	10 uM	24 h	3	142	0.3569	0.22764	1	1	1	1	0	Glucocorticoid receptor antagonist	CYP19A1|CYP11A1|NR3C1	-0.5255	1.2052	-1.5819
CPC014_PHH_24H:BRD-K08115555-001-04-4:10	BRD-K08115555	BRD-K08115555	PHH	trt_cp	10 uM	24 h	3	244	0.19	0.217722	0	0	1	1	0	TNF inhibitor	TNF	-0.5255	1.2052	-1.5819
REP.A011_HEK293_24H:P21	BRD-A33280134	etoposide	HEK293	trt_cp	1.11 uM	24 h	2	145	0.1875	0.166731	0	0	1	1	0	Topoisomerase inhibitor	TOP2A|TOP2B|CYP2E1|CYP3A5	-0.5254	1.2052	-1.5816
PBIOA019_HCC515_24H:I19	BRD-K71106091	fludarabine-phosphate	HCC515	trt_cp	10 uM	24 h	3	456	0.65	0.550516	1	1	1	1	0	DNA inhibitor|DNA repair enzyme inhibitor|Purine antagonist	POLA1|RRM1|DCK|POLD1|POLE|RRM2|RRM2B	-0.5253	1.2052	-1.5813
CPC011_HT29_6H:BRD-A23359898-001-06-2:10	BRD-A23359898	sibutramine	HT29	trt_cp	10 uM	6 h	4	181	0.18	0.182518	1	0	1	1	0	Serotonin receptor antagonist	SLC6A2|SLC6A4|SLC6A3|CYP2B6|CYP2C19|CYP3A5	-0.5252	1.2052	-1.5809
CPC003_HCC515_24H:BRD-K70241288-001-01-1:10	BRD-K70241288	L-692585	HCC515	trt_cp	10 uM	24 h	3	109	0.23	0.160106	1	0	1	1	0	Growth hormone releasing peptide ligand agonist	GHSR	-0.5251	1.2052	-1.5807
REP.A010_THP1_24H:C13	BRD-K12737986	veliparib	THP1	trt_cp	10 uM	24 h	3	61	0.1258	0.08858	1	0	1	1	0	PARP inhibitor	PARP1|PARP2	-0.5251	1.2052	-1.5806
CPC006_NCIH2073_6H:BRD-K92241597-001-02-9:80	BRD-K92241597	tosedostat	NCIH2073	trt_cp	80 uM	6 h	2	187	0.18	0.185519	0	0	1	1	0	Peptidase inhibitor	ANPEP|NPEPPS|LAP3	-0.525	1.2052	-1.5805
REP.B016_THP1_24H:L14	BRD-K55026842	azacitidine	THP1	trt_cp	0.74 uM	24 h	2	132	0.4282	0.240404	1	1	1	1	0	DNA methyltransferase inhibitor	DNMT1|DNMT3A	-0.5251	1.2052	-1.5805
CPC017_MCF7_24H:BRD-A99177642-001-02-5:10	BRD-A99177642	deltaline	MCF7	trt_cp	10 uM	24 h	5	71	0.12	0.0933363	1	0	1	1	0	Acetylcholine receptor antagonist	CHRNA7	-0.5249	1.2052	-1.5801
CPD002_MCF7_24H:BRD-A79226577-003-14-4:10	BRD-A79226577	tropisetron	MCF7	trt_cp	10 uM	24 h	3	111	0.33	0.19353	1	0	1	1	0	Serotonin receptor antagonist	HTR3A|GLRA1|GLRA2|GLRB|HTR4	-0.5249	1.2052	-1.5801
CPC006_SW480_6H:BRD-K61314889-001-01-0:10	BRD-K61314889	endo-IWR-1	SW480	trt_cp	10 uM	6 h	2	119	0.23	0.167289	0	0	1	1	0	PARP inhibitor	TNKS|TNKS2	-0.5249	1.2052	-1.5799
CPC005_A549_24H:BRD-K66093087-001-02-3:10	BRD-K66093087	FGIN-1-43	A549	trt_cp	10 uM	24 h	3	230	0.12	0.167991	1	0	1	1	0	Benzodiazepine receptor agonist	TSPO	-0.5248	1.2049	-1.5797
REP.A015_THP1_24H:P07	BRD-A61221616	medroxyprogesterone-acetate	THP1	trt_cp	10 uM	24 h	2	98	0.1498	0.122518	1	1	1	1	0	Progesterone receptor agonist	PGR	-0.5247	1.2046	-1.5793
EMU001_K562_24H:L04	BRD-K92428153	mycophenolate-mofetil	K562	trt_cp	0.125 uM	24 h	2	198	0.5475	0.332932	1	1	1	1	0	Inosine monophosphate dehydrogenase inhibitor|Dehydrogenase inhibitor|Hydroxycarboxylic acid receptor agonist|Immunosuppressant|Inositol monophosphatase inhibitor	IMPDH1|IMPDH2|HCAR2	-0.5246	1.2043	-1.5791
CPC016_NEU_24H:BRD-K33211335-337-03-7:10	BRD-K33211335	BRD-K33211335	NEU	trt_cp	10 uM	24 h	3	112	0.12	0.117228	0	0	1	1	0	Glutamate receptor antagonist|Sigma receptor agonist	SIGMAR1|CYP3A5|GRIN1|CHRNA2|CHRNA3|CHRNA4|CHRNA7|CHRNB2|CHRNB4|CYBA|CYBB|GRIN3A|NCF1|NCF2|NCF4|OPRD1|OPRK1|OPRM1|PGRMC1|RAC1|RAC2|SLC6A2|SLC6A4	-0.5245	1.204	-1.579
CPC011_A549_6H:BRD-K79511609-001-17-6:10	BRD-K79511609	BRD-K79511609	A549	trt_cp	10 uM	6 h	3	213	0.36	0.280009	1	0	1	1	0	Adenosine receptor agonist	ADORA1|ADORA2A|ADORA2B	-0.5245	1.2039	-1.5789
REP.A001_HELA_3H:H07	BRD-K27955832	lomeguatrib	HELA	trt_cp	10 uM	3 h	3	118	0.2153	0.161173	1	1	1	1	0	O6-alkylguanine-DNA alkyltransferase inhibitor	MGMT	-0.5245	1.2039	-1.5788
AICHI001_NALM6_24H:O14	BRD-K13566078	BMS-345541	NALM6	trt_cp	2.5 uM	24 h	3	166	0.39	0.257286	1	1	1	1	0	IKK inhibitor	IKBKB|CHUK	-0.5242	1.2011	-1.578
REP.B005_MCF7_24H:J23	BRD-A10012892	argatroban	MCF7	trt_cp	0.03 uM	24 h	2	119	0.2065	0.158513	1	1	1	1	0	Thrombin inhibitor	F2|CYP3A5	-0.5241	1.1995	-1.5777
REP.A010_HEK293_24H:E19	BRD-K13050541	acivicin	HEK293	trt_cp	12 uM	24 h	3	280	0.516	0.384357	1	1	1	1	0	Gamma glutamyltransferase Inhibitors	CAD|GGT1|CTPS1	-0.5239	1.191	-1.5771
REP.B014_PC3_24H:F21	BRD-K59197931	naproxen	PC3	trt_cp	0.25 uM	24 h	2	62	0.0761	0.0694574	1	1	1	1	0	Cyclooxygenase inhibitor	PTGS2|PTGS1	-0.5238	1.1834	-1.5768
REP.A020_HEK293_24H:I13	BRD-K45117373	Y-26763	HEK293	trt_cp	10 uM	24 h	2	165	0.0372	0.0792217	0	0	1	1	0	Potassium channel activator	KCNJ8|ABCC9	-0.5236	1.177	-1.5763
LKCP002_U2OS_48H:M17	BRD-K32842773	pemetrexed	U2OS	trt_cp	1.11 uM	48 h	4	152	0.3236	0.224262	1	1	1	1	0	Dihydrofolate reductase inhibitor|Thymidylate synthase inhibitor	TYMS|DHFR|GART|SLC22A8|ATIC	-0.5236	1.1757	-1.5761
LJP008_A549_24H:G19	BRD-K03406345	azacitidine	A549	trt_cp	10 uM	24 h	2	537	0.7758	0.652668	1	1	1	1	0	DNA inhibitor	DNMT1|DNMT3A	-0.5235	1.1737	-1.5759
CPC006_H1299_6H:BRD-K93176058-001-02-8:10	BRD-K93176058	AC-55649	H1299	trt_cp	10 uM	6 h	2	65	0.31	0.143538	0	0	1	1	0	Retinoid receptor agonist	RARB|RARA	-0.5235	1.174	-1.5759
CRCGN010_HEPG2_24H:BRD-K66808046:40.2	BRD-K66808046	oxyquinoline	HEPG2	trt_cp	40 uM	24 h	3	478	0.57	0.527815	0	0	1	1	0	Chelating agent	METAP2	-0.5232	1.171	-1.575
LJP009_SHSY5Y_24H:D12	BRD-K24859147	KIN001-242	SHSY5Y	trt_cp	0.04 uM	24 h	3	114	0.1145	0.115528	0	0	1	1	0	Protein kinase inhibitor	RPS6KA3	-0.5232	1.171	-1.575
REP.A028_THP1_24H:G01	BRD-K93918653	quizartinib	THP1	trt_cp	10 uM	24 h	2	181	0.2482	0.214324	0	0	1	1	0	FLT3 inhibitor	FLT3|CSF1R|KIT|RET|PDGFRA|PDGFRB	-0.5232	1.171	-1.5749
MOAR002_A375_24H:P19	BRD-K40496271	eltrombopag	A375	trt_cp	10 uM	24 h	3	335	0.57	0.441866	1	1	1	1	0	Thrombopoietin receptor agonist	MPL|CYP2C8	-0.5231	1.171	-1.5746
REP.B022_MCF10A_24H:I16	BRD-K72222507	quinapril	MCF10A	trt_cp	0.08 uM	24 h	2	178	0.3929	0.267412	0	0	1	1	0	ACE inhibitor	ACE	-0.5227	1.1698	-1.5736
CPC018_SKB_24H:BRD-K24023109-003-11-2:10	BRD-K24023109	diltiazem	SKB	trt_cp	10 uM	24 h	3	66	0.1	0.082149	1	0	1	1	0	Calcium channel blocker	CACNA1C|CYP3A5|CYP3A7|CACNA1S|CACNA2D1|CACNG1|HTR3A|KCNA5	-0.5228	1.17	-1.5736
CPC010_PC3_24H:BRD-K54314721-001-06-0:10	BRD-K54314721	zolmitriptan	PC3	trt_cp	10 uM	24 h	5	226	0.27	0.249785	1	0	1	1	0	Serotonin receptor agonist	HTR1B|HTR1D|HTR1A|HTR1F|HTR1E	-0.5226	1.1689	-1.5733
REP.A024_YAPC_24H:H19	BRD-K76205745	losartan	YAPC	trt_cp	10 uM	24 h	3	150	0.2637	0.201109	1	0	1	1	0	Angiotensin receptor antagonist	AGTR1	-0.5227	1.169	-1.5733
CPC014_PHH_24H:BRD-K93331255-001-01-2:10	BRD-K93331255	lypressin	PHH	trt_cp	10 uM	24 h	4	256	0.33	0.293905	0	0	1	1	0	Vasopressin receptor agonist	AVPR1A|AVPR1B|AVPR2	-0.5226	1.1688	-1.5732
CPC004_HCC515_24H:BRD-K35498378-001-05-3:10	BRD-K35498378	alrestatin	HCC515	trt_cp	10 uM	24 h	3	89	0.35	0.178468	1	1	1	1	0	Aldose reductase inhibitor	AKR1B1	-0.5226	1.1676	-1.573
REP.A002_HELA_24H:I17	BRD-A17411484	carprofen	HELA	trt_cp	0.125 uM	24 h	3	130	0.3989	0.230268	1	1	1	1	0	Cyclooxygenase inhibitor	PTGS2|PTGS1	-0.5225	1.1666	-1.5729
CPC014_NEU_24H:BRD-K70557564-305-01-0:10	BRD-K70557564	zosuquidar	NEU	trt_cp	10 uM	24 h	2	381	0.6	0.483469	0	0	1	1	0	P-glycoprotein inhibitor	ABCB1|ABCB4	-0.5224	1.1615	-1.5726
REP.B027_HEK293_24H:E15	BRD-K94436377	diosmin	HEK293	trt_cp	0.25 uM	24 h	2	61	0.0717	0.0668737	1	0	1	1	0	Aryl hydrocarbon receptor agonist|Capillary stabilizing agent	AHR	-0.5224	1.1591	-1.5725
LJP009_NPC.TAK_24H:D13	BRD-K52751261	TAK-715	NPC	trt_cp	10 uM	24 h	3	158	0.2356	0.195095	1	1	1	1	0	P38 MAPK inhibitor	MAPK14|TNF	-0.5224	1.1599	-1.5725
CPC001_PC3_6H:BRD-A42553870-001-05-1:10	BRD-A42553870	L-152804	PC3	trt_cp	10 uM	6 h	4	70	0.1	0.0846018	1	0	1	1	0	Neuropeptide receptor antagonist	NPY5R	-0.5223	1.145	-1.5721
CPC013_A549_6H:BRD-K64881305-001-01-1:10	BRD-K64881305	ispinesib	A549	trt_cp	10 uM	6 h	2	147	0.27	0.201452	0	0	1	1	0	Kinesin inhibitor	KIF11	-0.5223	1.1453	-1.5721
CPC001_HA1E_6H:BRD-K72024482-001-01-3:10	BRD-K72024482	MRS-1754	HA1E	trt_cp	10 uM	6 h	3	54	0.14	0.0879208	1	0	1	1	0	Adenosine receptor antagonist	ADORA2B	-0.5222	1.145	-1.572
CPC011_HT29_6H:BRD-K79511609-001-17-6:10	BRD-K79511609	BRD-K79511609	HT29	trt_cp	10 uM	6 h	4	128	0.12	0.125322	1	0	1	1	0	Adenosine receptor agonist	ADORA1|ADORA2A|ADORA2B	-0.5222	1.145	-1.572
CPC006_HCT116_6H:BRD-K26664453-001-03-4:10	BRD-K26664453	BRD-K26664453	HCT116	trt_cp	10 uM	6 h	2	26	0.26	0.0831388	1	1	1	1	0	Tubulin inhibitor	ACTB	-0.5222	1.145	-1.5718
REP.A027_MCF7_24H:M08	BRD-K90868879	canagliflozin	MCF7	trt_cp	3.33 uM	24 h	2	176	0.1051	0.137527	0	0	1	1	0	Sodium channel inhibitor	SLC5A2|SLC5A1|CYP2B6|CYP2C8	-0.5221	1.145	-1.5717
LJP008_HUVEC_24H:F16	BRD-K83189926	UNC-1215	HUVEC	trt_cp	0.37 uM	24 h	3	128	0.272	0.188677	1	1	1	1	0	L3MBTL antagonist	L3MBTL3	-0.522	1.145	-1.5714
CPC003_VCAP_6H:BRD-K41567364-001-01-2:10	BRD-K41567364	SB-334867	VCAP	trt_cp	10 uM	6 h	5	164	0.08	0.115824	0	0	1	1	0	Orexin receptor antagonist	HCRTR1|HCRTR2	-0.5216	1.145	-1.5703
HOG003_A549_6H:BRD-K78126613-001-16-0:10	BRD-K78126613	menadione	A549	trt_cp	10 uM	6 h	3	267	0.55	0.387496	1	1	1	1	0	Mitochondrial inhibitor|Phosphatase inhibitor	PKM|AOX1|BGLAP|F10|F2|F7|F9|GGCX|NQO1|NQO2|PROC|PROS1|PROZ|VKORC1|VKORC1L1	-0.5215	1.145	-1.5699
CPC006_A549_24H:BRD-K56343971-001-02-3:10	BRD-K56343971	vemurafenib	A549	trt_cp	10 uM	24 h	3	101	0.41	0.205771	1	1	1	1	0	RAF inhibitor	BRAF|CYP2C19|CYP3A4|CYP3A5|RAF1	-0.5214	1.145	-1.5696
CPC006_VCAP_6H:BRD-K01638814-051-10-1:10	BRD-K01638814	rilmenidine	VCAP	trt_cp	10 uM	6 h	4	93	0.35	0.182434	1	0	1	1	0	Adrenergic receptor agonist|Imidazoline receptor agonist	NISCH|ADRA2A	-0.5212	1.145	-1.569
CPC006_HA1E_24H:M07	BRD-A43331270	niguldipine	HA1E	trt_cp	10 uM	24 h	3	171	0.4527	0.281342	1	1	1	1	0	Adrenergic receptor antagonist|Calcium channel blocker	ADRA1A|CACNA1C	-0.521	1.1437	-1.5684
MOAR002_A375_24H:G20	BRD-K88429204	pyrimethamine	A375	trt_cp	3.33 uM	24 h	3	582	0.72	0.654573	1	1	1	1	0	Dihydrofolate reductase inhibitor	DHFRP1|HEXA|STAT3|DHFR|SLC47A1	-0.521	1.1436	-1.5683
LJP005_SKBR3_3H:I24	BRD-K68174511	torin-2	SKBR3	trt_cp	0.04 uM	3 h	2	169	0.5901	0.319328	1	1	1	1	0	MTOR inhibitor	MTOR	-0.5206	1.1298	-1.5672
REP.B013_THP1_24H:M22	BRD-K43457670	acetazolamide	THP1	trt_cp	0.08 uM	24 h	2	80	0.0257	0.0458503	1	0	1	1	0	Carbonic anhydrase inhibitor	CA14|CA2|CA1|CA4|CA12|CA7|CA13|CA6|AQP1|CA3	-0.5206	1.1289	-1.567
CPC001_HCC515_24H:BRD-A14574269-051-01-4:10	BRD-A14574269	UB-165	HCC515	trt_cp	10 uM	24 h	3	218	0.32	0.267075	1	0	1	1	0	Acetylcholine receptor agonist	CHRNA3|CHRNA4|CHRNB2	-0.5205	1.1273	-1.5667
CPC006_A549_6H:BRD-K48923948-001-01-5:11.1	BRD-K48923948	BMS-641988	A549	trt_cp	12 uM	6 h	4	92	0.24	0.150255	1	1	1	1	0	Androgen receptor antagonist	AR	-0.5203	1.1235	-1.5663
CPC011_VCAP_24H:BRD-K98769987-001-17-9:10	BRD-K98769987	flumazenil	VCAP	trt_cp	10 uM	24 h	5	538	0.67	0.607098	1	1	1	1	0	Benzodiazepine receptor antagonist	GABRA1|GABRA2|GABRA3|GABRA5|GABRA4|GABRA6|GABRB1|GABRB2|GABRB3|GABRD|GABRE|GABRG1|GABRG2|GABRG3|GABRP|GABRQ	-0.5203	1.1241	-1.5663
CPC017_PHH_24H:BRD-A37704979-001-04-0:10	BRD-A37704979	SB-203580	PHH	trt_cp	10 uM	24 h	3	81	0.18	0.122098	0	0	1	1	0	P38 MAPK inhibitor	MAPK14|MAPK1|MAPK11|AKT1|ALOX5|CHEK1|CYP2D6|CYP3A4|GAK|GSK3B|LCK|MAPK10|MAPK12|MAPK8|MAPK9|PRKCA|RAF1|RIPK2|ROCK1|RPS6KB1|SGK1|SRC|TNF	-0.5203	1.1223	-1.5662
REP.A024_THP1_24H:L02	BRD-K45275534	betrixaban	THP1	trt_cp	3.33 uM	24 h	2	75	0.2475	0.137768	1	1	1	1	0	Coagulation factor inhibitor	F10|KCNH2	-0.5202	1.1193	-1.5659
MOAR004_PC3_24H:J19	BRD-K19352500	prochlorperazine	PC3	trt_cp	10 uM	24 h	3	156	0.28	0.211335	1	1	1	1	0	Dopamine receptor antagonist	DRD2|DRD1|DRD3|DRD4	-0.52	1.1175	-1.5653
CPC006_HEPG2_6H:BRD-K73261812-001-01-1:10	BRD-K73261812	BRD-K73261812	HEPG2	trt_cp	10 uM	6 h	3	178	0.31	0.237532	1	0	1	1	0	Beta catenin inhibitor	CTNNB1	-0.5199	1.1175	-1.5651
EMU001_KMS34_24H:B24	BRD-A50998626	palomid-529	KMS34	trt_cp	0.01 uM	24 h	2	108	0.3271	0.190056	1	1	1	1	0	AKT inhibitor|FGFR inhibitor|MTOR inhibitor|VEGFR inhibitor	MTOR|FGF2	-0.5199	1.1175	-1.5651
CPC015_HEPG2_6H:BRD-A62525898-001-04-5:10	BRD-A62525898	prednisone	HEPG2	trt_cp	10 uM	6 h	2	58	0.04	0.0487051	0	0	1	1	0	Glucocorticoid receptor agonist	NR3C1|HSD11B1	-0.5199	1.1175	-1.5651
CPC005_A549_24H:BRD-K78599730-001-03-4:10	BRD-K78599730	manumycin-a	A549	trt_cp	10 uM	24 h	3	168	0.38	0.255492	1	1	1	1	0	Farnesyltransferase inhibitor|NFKB inhibitor	FNTA|IKBKB	-0.5199	1.1175	-1.565
ISO002_MCF10A.TP53.M_24H:M11	BRD-K67844266	MLN-4924	MCF10A	trt_cp	0.125 uM	24 h	2	93	0.4811	0.21389	1	1	1	1	0	Nedd activating enzyme inhibitor	NAE1|UBA3	-0.5199	1.1175	-1.5649
REP.A015_HEK293_24H:A08	BRD-A55579717	cytisine	HEK293	trt_cp	3.33 uM	24 h	3	102	0.219	0.151131	1	0	1	1	0	Acetylcholine receptor agonist	CHRNA4|CHRNB2|CHRNA2|CHRNA3|CHRNA7|CHRNA6|CHRNB4	-0.5198	1.1175	-1.5648
CPC006_HEPG2_6H:BRD-A73680854-001-01-3:10	BRD-A73680854	PT-630	HEPG2	trt_cp	10 uM	6 h	3	151	0.34	0.229118	1	0	1	1	0	Dipeptidyl peptidase inhibitor	DPP4	-0.5198	1.1175	-1.5648
CPC001_VCAP_24H:H10	BRD-K10177585	PSB-11	VCAP	trt_cp	10 uM	24 h	5	69	0.0838	0.0768913	0	0	1	1	0	Adenosine receptor antagonist	ADORA3|ADORA1|ADORA2A	-0.5197	1.1175	-1.5644
CPC004_HCC515_24H:BRD-A09467419-003-14-1:10	BRD-A09467419	mebeverine	HCC515	trt_cp	10 uM	24 h	3	95	0.23	0.149471	1	0	1	1	0	Acetylcholine receptor antagonist	CHRM1|CHRM2|CHRM3|CHRM4	-0.5197	1.1175	-1.5643
CPC002_VCAP_6H:BRD-K52620403-015-02-6:10	BRD-K52620403	STO-609	VCAP	trt_cp	10 uM	6 h	4	305	0.52	0.4027	0	0	1	1	0	Calmodulin inhibitor	CAMKK1|CAMKK2	-0.5196	1.1175	-1.5642
CPC014_SKB_24H:BRD-K70557564-305-01-0:10	BRD-K70557564	zosuquidar	SKB	trt_cp	10 uM	24 h	4	89	0.07	0.0798132	0	0	1	1	0	P-glycoprotein inhibitor	ABCB1|ABCB4	-0.5196	1.1175	-1.5641
CPC014_PC3_6H:BRD-K63915849-001-01-1:10	BRD-K63915849	AS-604850	PC3	trt_cp	10 uM	6 h	4	130	0.13	0.131454	1	0	1	1	0	PI3K inhibitor	PIK3CG|PIK3CA	-0.5194	1.1175	-1.5635
CPC005_VCAP_24H:BRD-A33711280-311-02-0:10	BRD-A33711280	metixene	VCAP	trt_cp	10 uM	24 h	5	123	0.09	0.106391	0	0	1	1	0	Acetylcholine receptor antagonist	CHRM5|CHRM1|CHRM2|CHRM3|CHRM4	-0.5194	1.1175	-1.5635
REP.A018_THP1_24H:D07	BRD-K62676709	guanethidine	THP1	trt_cp	10 uM	24 h	2	120	0.082	0.100306	0	0	1	1	0	Adrenergic receptor antagonist	SLC6A2	-0.5194	1.1175	-1.5634
CPC002_VCAP_24H:BRD-K50422030-003-01-8:10	BRD-K50422030	clomethiazole	VCAP	trt_cp	10 uM	24 h	3	133	0.39	0.230297	1	0	1	1	0	GABA receptor antagonist|GABA receptor modulator	GABRA1	-0.5192	1.1175	-1.5629
REP.A021_A375_24H:O16	BRD-K86797399	SB-939	A375	trt_cp	0.37 uM	24 h	3	371	0.6349	0.490761	1	1	1	1	0	HDAC inhibitor	HDAC1|HDAC2|HDAC10|HDAC3|HDAC4|HDAC5|HDAC9	-0.5191	1.1175	-1.5626
CPC017_PHH_24H:BRD-K74195153-050-03-0:10	BRD-K74195153	irsogladine	PHH	trt_cp	10 uM	24 h	3	107	0.12	0.114581	0	0	1	1	0	Phosphodiesterase inhibitor	PDE4A	-0.5191	1.1175	-1.5626
LJP009_A549_24H:H13	BRD-K91900765	VX-745	A549	trt_cp	10 uM	24 h	5	207	0.1592	0.183564	0	0	1	1	0	P38 MAPK inhibitor	MAPK14|MAPK11|MAPK12	-0.519	1.1175	-1.5624
REP.A017_MDAMB231_24H:M15	BRD-A61793559	metolazone	MDAMB231	trt_cp	1.11 uM	24 h	3	117	0.1395	0.129185	0	0	1	1	0	Carbonic anhydrase inhibitor	SLC12A3|CA2|CA7	-0.5189	1.1175	-1.5621
CPC006_NCIH596_6H:BRD-K06890060-001-05-9:40	BRD-K06890060	alda-1	NCIH596	trt_cp	40 uM	6 h	2	58	0.06	0.0596513	1	0	1	1	0	Aldehyde dehydrogenase activator	ALDH2	-0.5189	1.1175	-1.5621
CPC016_NEU_24H:BRD-K35629949-001-01-2:10	BRD-K35629949	SR-27897	NEU	trt_cp	10 uM	24 h	3	206	0.3	0.251377	0	0	1	1	0	CCK receptor antagonist	CCKAR	-0.5189	1.1175	-1.5619
MOAR015_HAP1.ITGA4_24H:L07	BRD-K27305650	LY-294002	HAP1	trt_cp	3.33 uM	24 h	3	142	0.3829	0.235786	1	1	1	1	0	MTOR inhibitor|DNA dependent protein kinase inhibitor|Phosphodiesterase inhibitor|PLK inhibitor	MTOR|PIK3CD|PIK3CG|PIK3CA|PLK1|PRKDC|PIK3CB|PDE2A|AKT1|CHEK1|GSK3B|LCK|MAPK1|MAPK11|MAPK12|MAPK14|MAPK8|PRKCA|ROCK1|RPS6KB1|SGK1	-0.5188	1.1175	-1.5618
REP.A025_A549_24H:G12	BRD-K73815512	HC-030031	A549	trt_cp	0.04 uM	24 h	2	94	0.2154	0.143886	0	0	1	1	0	TRPA1 channel blocker	TRPA1	-0.5186	1.1175	-1.5612
REP.B021_MCF7_24H:I10	BRD-K83794243	palovarotene	MCF7	trt_cp	0.08 uM	24 h	2	160	0.5051	0.287461	1	1	1	1	0	Retinoid receptor agonist	RARG	-0.5186	1.1175	-1.5611
PAC003_U2OS_6H:BRD-K31633810-003-01-0:10	BRD-K31633810	DAU-5884	U2OS	trt_cp	10 uM	6 h	2	87	0.27	0.154979	0	0	1	1	0	Acetylcholine receptor antagonist	CHRM3|CHRM1	-0.5186	1.1175	-1.561
REP.A012_THP1_24H:C01	BRD-K00494077	trovafloxacin	THP1	trt_cp	10 uM	24 h	3	291	0.3962	0.343348	1	1	1	1	0	Bacterial DNA inhibitor	TOP2A	-0.5185	1.1175	-1.5608
CPC018_A375_6H:BRD-K83597974-003-15-6:10	BRD-K83597974	pargyline	A375	trt_cp	10 uM	6 h	5	130	0.1	0.115293	0	0	1	1	0	Monoamine oxidase inhibitor	MAOB|MAOA	-0.5185	1.1175	-1.5608
CPC006_NCIH596_6H:BRD-K01638814-051-10-1:10	BRD-K01638814	rilmenidine	NCIH596	trt_cp	10 uM	6 h	2	56	0.27	0.124339	1	1	1	1	0	Adrenergic receptor agonist|Imidazoline receptor agonist	NISCH|ADRA2A	-0.5184	1.1175	-1.5605
PAC004_U2OS_6H:BRD-K08109516-001-01-1:10	BRD-K08109516	L-701324	U2OS	trt_cp	10 uM	6 h	2	95	0.26	0.15892	0	0	1	1	0	Glutamate receptor antagonist	GRIN1|GRIN2A|GRIN2B|GRIN2C|GRIN2D	-0.5184	1.1175	-1.5604
CPD003_MCF7_24H:K13	BRD-K82562631	tolmetin	MCF7	trt_cp	10 uM	24 h	3	91	0.2087	0.139352	1	1	1	1	0	Cyclooxygenase inhibitor	PTGS2|PTGS1	-0.5183	1.1175	-1.5603
CPC013_SKB_24H:BRD-A45664787-001-01-4:10	BRD-A45664787	iloprost	SKB	trt_cp	10 uM	24 h	4	109	0.29	0.179781	0	0	1	1	0	Platelet aggregation inhibitor|Prostanoid receptor agonist	PTGIR|PTGER1|PTGER2|PDE4A|PDE4B|PDE4C|PDE4D|PLAT|PTGDR|PTGER3|PTGER4|PTGFR|TBXA2R	-0.5183	1.1175	-1.5602
REP.A002_YAPC_24H:N01	BRD-A17883755	lenalidomide	YAPC	trt_cp	10 uM	24 h	2	163	0.1691	0.167879	0	0	1	1	0	Carcinogen	CRBN|TNF|CDH5|PTGS2|TNFSF11	-0.5183	1.1175	-1.56
REP.B024_MCF7_24H:I08	BRD-K76810206	nicergoline	MCF7	trt_cp	0.74 uM	24 h	2	84	0.2541	0.147731	0	0	1	1	0	Adrenergic receptor antagonist	ADRA1A	-0.5182	1.1175	-1.5599
CPC005_A549_6H:BRD-A56020723-001-02-0:10	BRD-A56020723	CA-074-Me	A549	trt_cp	10 uM	6 h	3	74	0.2	0.123016	1	1	1	1	0	Cathepsin inhibitor	CTSB	-0.5182	1.1175	-1.5598
CPC016_A375_6H:BRD-K97810537-001-03-7:10	BRD-K97810537	beclomethasone-dipropionate	A375	trt_cp	10 uM	6 h	5	197	0.23	0.215242	1	0	1	1	0	Immunosuppressant|Glucocorticoid receptor agonist	NR3C1|CYP3A5|ADGRG3	-0.5181	1.1175	-1.5597
REP.B018_PC3_24H:L03	BRD-A65248799	EMD-53998	PC3	trt_cp	0.25 uM	24 h	2	67	0.166	0.10664	1	1	1	1	0	Phosphodiesterase inhibitor	PDE3A|TNNC1	-0.518	1.1175	-1.5592
CPC006_AGS_6H:BRD-K73261812-001-01-1:10	BRD-K73261812	BRD-K73261812	AGS	trt_cp	10 uM	6 h	2	279	0.7	0.446871	1	1	1	1	0	Beta catenin inhibitor	CTNNB1	-0.5179	1.1175	-1.5591
LJP002_MCF7_24H:P22	BRD-K42728290	NVP-BGJ398	MCF7	trt_cp	0.08 uM	24 h	2	82	0.2617	0.148129	0	0	1	1	0	FGFR inhibitor	FGFR1|FGFR2|FGFR3|FGFR4|KDR	-0.5179	1.1175	-1.5591
CPC004_PC3_6H:BRD-K39746403-084-03-1:10	BRD-K39746403	erythromycin-estolate	PC3	trt_cp	10 uM	6 h	3	113	0.13	0.122558	1	0	1	1	0	Bacterial 50S ribosomal subunit inhibitor	ABCB1|ALB|CYP3A4|CYP51A1|KCNH2|MLNR|SLC47A1	-0.5179	1.1175	-1.559
REP.A005_PC3_24H:B18	BRD-K08037784	arbutin	PC3	trt_cp	0.04 uM	24 h	2	60	0.2557	0.125248	1	1	1	1	0	Melanin inhibitor	TYR	-0.5178	1.1175	-1.5588
LCP001_MCF10A.WT_12H:D21	BRD-K29359156	ebselen	MCF10A	trt_cp	1.11 uM	12 h	3	107	0.46	0.224337	1	1	1	1	0	Cyclooxygenase inhibitor|Glutathione peroxidase agonist|H+/K+-ATPase inhibitor|Nitric oxide synthase inhibitor	LTB4R|NOX3|ALB	-0.5178	1.1175	-1.5587
CPC014_VCAP_24H:BRD-K08115555-001-04-4:10	BRD-K08115555	BRD-K08115555	VCAP	trt_cp	10 uM	24 h	5	161	0.36	0.243442	0	0	1	1	0	TNF inhibitor	TNF	-0.5178	1.1175	-1.5586
REP.B027_A549_24H:O20	BRD-A38592941	timonacic	A549	trt_cp	0.74 uM	24 h	2	72	0.0734	0.0735097	0	0	1	1	0	Antioxidant	ANXA5	-0.5177	1.1175	-1.5585
PBIOA021_HCC515_24H:P20	BRD-K33240821	plerixafor	HCC515	trt_cp	3.33 uM	24 h	3	223	0.27	0.248122	1	1	1	1	0	CC chemokine receptor antagonist	CXCR4|ACKR3|CCR4	-0.5175	1.1175	-1.5578
CPC006_HCC515_24H:E04	BRD-A91699651	chloroquine	HCC515	trt_cp	10 uM	24 h	5	122	0.2174	0.16468	1	0	1	1	0	Antimalarial	CYP2C8|GSTA2|MRGPRX1|TLR9|TNF	-0.5175	1.1175	-1.5577
REP.A014_MCF7_24H:J20	BRD-K57764956	cariprazine	MCF7	trt_cp	3.33 uM	24 h	3	101	0.2172	0.149769	1	0	1	1	0	Dopamine receptor antagonist	DRD2|DRD3	-0.5174	1.1175	-1.5575
CPC014_MCF7_6H:O04	BRD-K83837640	JNJ-26481585	MCF7	trt_cp	10 uM	6 h	5	255	0.4505	0.342727	1	1	1	1	0	HDAC inhibitor	HDAC1|HDAC10|HDAC11|HDAC2|HDAC3|HDAC4|HDAC5|HDAC6|HDAC7|HDAC8|HDAC9|MDM2	-0.5172	1.1173	-1.557
REP.A018_PC3_24H:I01	BRD-K64622987	torcetrapib	PC3	trt_cp	10 uM	24 h	3	223	0.3896	0.298052	0	0	1	1	0	Cholesteryl ester transfer protein inhibitor	CETP	-0.5171	1.1164	-1.5567
LJP007_HEPG2_24H:A08	BRD-K64857848	XMD-885	HEPG2	trt_cp	3.33 uM	24 h	2	47	0.3687	0.133112	1	1	1	1	0	MAP kinase inhibitor	MAPK7|LRRK2	-0.5171	1.1158	-1.5565
PCL001_HEPG2_24H:BRD-K13094524:10	BRD-K13094524	PFI-1	HEPG2	trt_cp	10 uM	24 h	3	259	0.52	0.371092	1	1	1	1	0	Bromodomain inhibitor	BRD4	-0.5168	1.0951	-1.5557
REP.B008_MDAMB231_24H:G11	BRD-K73691377	alprostadil	MDAMB231	trt_cp	0.03 uM	24 h	2	54	0.1858	0.101286	1	1	1	1	0	Prostanoid receptor agonist	PTGER1|PTGER2|CATSPER1|CATSPER2|CATSPER3|CATSPER4|PTGDR|PTGER4|PTGIR	-0.5168	1.0949	-1.5556
CPC001_PC3_6H:BRD-K82823804-001-01-7:10	BRD-K82823804	PD-407824	PC3	trt_cp	10 uM	6 h	4	284	0.51	0.384835	1	1	1	1	0	PKC inhibitor	WEE1	-0.5167	1.0918	-1.5553
CPC006_VCAP_6H:BRD-K32107296-001-03-7:10	BRD-K32107296	temozolomide	VCAP	trt_cp	10 uM	6 h	4	113	0.21	0.155768	1	0	1	1	0	DNA alkylating agent	TOP2A|MGMT	-0.5167	1.0916	-1.5552
CPC005_PC3_6H:BRD-A43671941-003-03-6:10	BRD-A43671941	oxprenolol	PC3	trt_cp	10 uM	6 h	4	99	0.08	0.0899898	1	0	1	1	0	Adrenergic receptor antagonist	ADRB1|ADRB2	-0.5165	1.0916	-1.5548
CPC014_NEU_24H:BRD-K13087974-001-01-7:10	BRD-K13087974	CGP-52411	NEU	trt_cp	10 uM	24 h	2	76	0.16	0.111506	0	0	1	1	0	EGFR inhibitor	EGFR	-0.5165	1.0916	-1.5547
REP.B016_MCF10A_24H:H04	BRD-A53176877	methylprednisolone	MCF10A	trt_cp	0.08 uM	24 h	2	81	0.2916	0.155406	1	1	1	1	0	Glucocorticoid receptor agonist	NR3C1	-0.5164	1.0916	-1.5544
AICHI001_OCILY10_24H:M14	BRD-K05804044	AZ-628	OCILY10	trt_cp	2.5 uM	24 h	2	49	0.392	0.140143	0	0	1	1	0	RAF inhibitor	BRAF|RAF1	-0.5164	1.0916	-1.5544
REP.A028_YAPC_24H:J22	BRD-K95739795	tetrabenazine	YAPC	trt_cp	0.37 uM	24 h	2	91	0.2363	0.14828	0	0	1	1	0	Vesicular monoamine transporter inhibitor	SLC18A2|DRD2|SLC18A1	-0.5163	1.0916	-1.5543
REP.A012_HELA_24H:F13	BRD-K01039503	sofalcone	HELA	trt_cp	10 uM	24 h	2	191	0.2202	0.207375	1	1	1	1	0	Mucus protecting agent	HPGD|CBR1	-0.5164	1.0916	-1.5543
CPC015_ASC_24H:BRD-K63828191-003-11-5:10	BRD-K63828191	raloxifene	ASC	trt_cp	10 uM	24 h	4	249	0.31	0.280938	0	0	1	1	0	Estrogen receptor antagonist|Selective estrogen receptor modulator (SERM)	ESR1|ESR2|ACVRL1|ENG	-0.5163	1.0916	-1.5541
CPC002_VCAP_24H:BRD-A85424553-050-03-9:10	BRD-A85424553	thioperamide	VCAP	trt_cp	10 uM	24 h	3	57	0.24	0.11827	1	0	1	1	0	Histamine receptor antagonist	HRH3|HRH4	-0.5163	1.0916	-1.5541
CPC017_MCF7_6H:BRD-K13533483-001-03-0:10	BRD-K13533483	cyclosporin-a	MCF7	trt_cp	10 uM	6 h	4	222	0.42	0.308768	1	1	1	1	0	Calcineurin inhibitor	PPIA|CYP3A5|CYP3A7|PPID|ABCB11|CAMLG|FPR1|PPIF|PPP3R2|SLC10A1|SLCO1B1|SLCO1B3	-0.5161	1.0916	-1.5536
CPC018_NPC_24H:BRD-K17378184-300-03-4:10	BRD-K17378184	BP-897	NPC	trt_cp	10 uM	24 h	3	128	0.18	0.153487	0	0	1	1	0	Dopamine receptor agonist	DRD3|ADRA1A|ADRA1D|ADRA2A|DRD1|DRD2|DRD4|HTR1A|HTR2B	-0.516	1.0916	-1.5532
CPC003_HA1E_6H:BRD-K89055274-048-14-4:10	BRD-K89055274	alverine	HA1E	trt_cp	10 uM	6 h	2	34	0.22	0.0874543	1	0	1	1	0	Muscle relaxant	HTR1A	-0.5159	1.0916	-1.5531
CPC006_NCIH2073_6H:BRD-A73680854-001-01-3:10	BRD-A73680854	PT-630	NCIH2073	trt_cp	10 uM	6 h	2	68	0.15	0.102125	0	0	1	1	0	Dipeptidyl peptidase inhibitor	DPP4	-0.5159	1.0916	-1.5529
LJP001_SKBR3_24H:E17	BRD-K09991945	BRD-K09991945	SKBR3	trt_cp	10 uM	24 h	4	72	0.2361	0.131839	1	0	1	1	0	PKC inhibitor	GSK3B	-0.5158	1.0916	-1.5526
CPC001_HCC515_24H:BRD-K79116891-003-03-7:10	BRD-K79116891	proxymetacaine	HCC515	trt_cp	10 uM	24 h	3	154	0.4	0.250969	1	1	1	1	0	Sodium channel inhibitor	SCN9A|SCN10A|SCN5A	-0.5158	1.0916	-1.5526
REP.B026_HELA_24H:B13	BRD-K87737963	CYT-387	HELA	trt_cp	2.22 uM	24 h	2	205	0.518	0.329513	1	1	1	1	0	JAK inhibitor	JAK1|JAK2|JAK3	-0.5157	1.0916	-1.5525
REP.B025_THP1_24H:G02	BRD-K91822704	torcitabine	THP1	trt_cp	0.74 uM	24 h	2	89	0.1226	0.105626	0	0	1	1	0	DNA inhibitor	DCK|TK2	-0.5157	1.0916	-1.5524
CPC001_HA1E_24H:BRD-K69556541-001-02-6:10	BRD-K69556541	ryanodine	HA1E	trt_cp	10 uM	24 h	3	113	0.34	0.198203	1	1	1	1	0	Calcium channel blocker	RYR1	-0.5157	1.0916	-1.5523
ERG005_VCAP_24H:BRD-K55127134-300-06-2:20	BRD-K55127134	fluphenazine	VCAP	trt_cp	20 uM	24 h	4	233	0.55	0.361984	0	0	1	1	0	Dopamine receptor antagonist	DRD2|DRD1|CHRNA7|CALM1|DRD5|HRH1|HTR2A|HTR6|HTR7	-0.5157	1.0916	-1.5523
REP.B022_MCF7_24H:D02	BRD-K68132782	terbinafine	MCF7	trt_cp	0.74 uM	24 h	2	74	0.1416	0.103509	1	1	1	1	0	Fungal squalene epoxidase inhibitor	CYP2C19|CYP2C8|SQLE	-0.5156	1.0916	-1.5521
REP.B024_MDAMB231_24H:I11	BRD-K76810206	nicergoline	MDAMB231	trt_cp	0.03 uM	24 h	2	132	0.2437	0.181362	0	0	1	1	0	Adrenergic receptor antagonist	ADRA1A	-0.5155	1.0916	-1.5519
CPC018_PHH_24H:BRD-K39670393-303-01-3:10	BRD-K39670393	amthamine	PHH	trt_cp	10 uM	24 h	2	273	0.56	0.395372	0	0	1	1	0	Histamine receptor agonist	HRH2	-0.5156	1.0916	-1.5519
CPC014_VCAP_24H:BRD-K70557564-305-01-0:10	BRD-K70557564	zosuquidar	VCAP	trt_cp	10 uM	24 h	5	81	0.23	0.138018	0	0	1	1	0	P-glycoprotein inhibitor	ABCB1|ABCB4	-0.5154	1.0916	-1.5515
CPC017_MCF7_24H:BRD-K79930101-300-01-1:10	BRD-K79930101	GW-583340	MCF7	trt_cp	10 uM	24 h	5	177	0.18	0.18049	1	0	1	1	0	Receptor tyrosine protein kinase inhibitor|EGFR inhibitor|ERBB2 inhibitor	EGFR|ERBB2	-0.5154	1.0916	-1.5513
REP.A014_HELA_24H:M10	BRD-K38197229	bumetanide	HELA	trt_cp	0.37 uM	24 h	3	118	0.3149	0.194921	1	1	1	1	0	Solute carrier family member inhibitor	SLC12A1|SLC12A2|CFTR|GPR35|SLC12A4|SLC12A5	-0.5153	1.0916	-1.5512
REP.B022_YAPC_24H:K17	BRD-K73319509	PF-04217903	YAPC	trt_cp	0.03 uM	24 h	2	113	0.2306	0.16323	1	1	1	1	0	MET inhibitor	MET	-0.5153	1.0913	-1.5511
REP.B010_MDAMB231_24H:J24	BRD-A14262390	guanadrel	MDAMB231	trt_cp	0.01 uM	24 h	2	93	0.2483	0.15366	0	0	1	1	0	Adrenergic receptor antagonist	SLC6A2	-0.5152	1.0907	-1.5508
CPC010_PC3_24H:BRD-A17448384-001-07-0:10	BRD-A17448384	beclometasone	PC3	trt_cp	10 uM	24 h	5	297	0.36	0.330644	1	1	1	1	0	Glucocorticoid receptor agonist	NR3C1	-0.5152	1.0907	-1.5508
LKCP002_MCF7_24H:O24	BRD-K17513304	firategrast	MCF7	trt_cp	0.12 uM	24 h	4	210	0.3608	0.278339	1	1	1	1	0	Integrin inhibitor	ITGA4|ITGB1|ITGB7	-0.5151	1.0902	-1.5507
CPC005_A549_6H:BRD-A22769835-300-03-2:10	BRD-A22769835	homochlorcyclizine	A549	trt_cp	10 uM	6 h	3	119	0.33	0.200383	1	0	1	1	0	Antihistamine	HRH1	-0.5151	1.0894	-1.5506
LJP005_SKBR3_24H:I05	BRD-K58772419	AZD-6482	SKBR3	trt_cp	0.12 uM	24 h	3	142	0.41	0.243987	1	1	1	1	0	PI3K inhibitor	PIK3CB|PIK3CD|PIK3CG|PIK3CA	-0.5151	1.0894	-1.5504
CPC014_SKB_24H:BRD-K99964838-001-03-6:10	BRD-K99964838	bosutinib	SKB	trt_cp	10 uM	24 h	4	306	0.53	0.40722	0	0	1	1	0	Src inhibitor|Abl inhibitor|Bcr-Abl inhibitor	ABL1|SRC|BCR|LYN|CAMK2G|HCK|CAMK1D|CDK2|FRK|FYN|MAP2K1|MAP2K2|MAP3K2|MAP4K5|STK10|STK24|STK4|TNK2|TXK	-0.5149	1.0894	-1.5499
CPC004_PC3_24H:BRD-K25394294-001-08-1:10	BRD-K25394294	oxaprozin	PC3	trt_cp	10 uM	24 h	5	139	0.34	0.219825	0	0	1	1	0	Cyclooxygenase inhibitor	PTGS1|PTGS2	-0.5147	1.0894	-1.5494
CPC001_PC3_6H:BRD-A28318179-003-03-6:10	BRD-A28318179	aminomethyltransferase	PC3	trt_cp	10 uM	6 h	4	74	0.21	0.126054	1	0	1	1	0	Nitric oxide synthase inhibitor	NOS2	-0.5147	1.0894	-1.5494
LJP008_HEK293_24H:E22	BRD-K32536677	AGK-2	HEK293	trt_cp	0.37 uM	24 h	2	86	0.3685	0.180011	1	1	1	1	0	SIRT inhibitor	SIRT2	-0.5145	1.0894	-1.5489
REP.A015_THP1_24H:P15	BRD-K61397605	romidepsin	THP1	trt_cp	1.11 uM	24 h	2	625	0.8168	0.722484	0	0	1	1	0	HDAC inhibitor	HDAC1|HDAC2|CYP2B6|CYP2C19|CYP3A5|HDAC3|HDAC4|HDAC5|HDAC6|HDAC7|HDAC8|HDAC9	-0.5145	1.0894	-1.5488
PBIOA015_MCF7_24H:M14	BRD-K61401890	deguelin	MCF7	trt_cp	3.33 uM	24 h	3	227	0.4	0.304701	1	1	1	1	0	NADPH inhibitor	AKT1	-0.5144	1.0894	-1.5486
REP.B010_A549_24H:N06	BRD-A14941520	dofequidar	A549	trt_cp	0.01 uM	24 h	2	33	0.3302	0.105554	1	1	1	1	0	MRP inhibitor|P-glycoprotein inhibitor	ABCB1|ABCC1	-0.5144	1.0894	-1.5484
CPC002_VCAP_24H:BRD-K27351809-001-02-0:10	BRD-K27351809	nomegestrol-acetate	VCAP	trt_cp	10 uM	24 h	3	111	0.26	0.171782	1	0	1	1	0	Progesterone receptor agonist	PGR	-0.5142	1.0894	-1.548
CPC018_NPC_24H:BRD-A91452556-001-03-2:10	BRD-A91452556	estradiol-cypionate	NPC	trt_cp	10 uM	24 h	3	184	0.21	0.198769	0	0	1	1	0	Estrogen receptor agonist	ESR1	-0.5142	1.0894	-1.5478
REP.B004_PC3_24H:G21	BRD-A02006392	nitrendipine	PC3	trt_cp	0.25 uM	24 h	3	82	0.1767	0.121718	1	0	1	1	0	Calcium channel blocker	CACNA1C|CACNA1D|CACNA2D1|CACNA1H|CACNA1S|CACNA2D2|CACNB2|CACNG1|KCNN4	-0.5142	1.0894	-1.5478
REP.A015_JURKAT_24H:M04	BRD-K59632282	quinidine	JURKAT	trt_cp	0.37 uM	24 h	2	81	0.0348	0.0536862	1	0	1	1	0	Sodium channel inhibitor	SCN5A|ABCB1|CYP2D6|KCNA5|KCNA7|KCNH1|KCNH2|KCNH5|KCNK1|KCNK6|SLC29A4	-0.5141	1.0894	-1.5477
REP.A026_MCF10A_24H:F19	BRD-K89375097	pirenzepine	MCF10A	trt_cp	10 uM	24 h	3	184	0.2135	0.200419	0	0	1	1	0	Acetylcholine receptor antagonist	CHRM1|CHRM2|CHRM3|CHRM4|CHRM5	-0.5141	1.0894	-1.5475
AICHI001_TMD8_4H:I01	BRD-A17883755	lenalidomide	TMD8	trt_cp	10 uM	4 h	3	194	0.44	0.295432	1	1	1	1	0	Carcinogen	CRBN|TNF|CDH5|PTGS2|TNFSF11	-0.5138	1.0894	-1.5466
REP.A023_HT29_24H:N20	BRD-K72166146	BRD-K72166146	HT29	trt_cp	3.33 uM	24 h	3	118	0.2839	0.185078	1	0	1	1	0	Serotonin receptor agonist	HTR1D|HTR1B|ADRA2A|DRD2|HTR1E|HTR1F|HTR2B|HTR7	-0.5138	1.0894	-1.5465
REP.A005_HELA_24H:I14	BRD-K09711437	varespladib	HELA	trt_cp	3.33 uM	24 h	3	130	0.3815	0.22519	1	1	1	1	0	Secretory phospholipase inhibitor	PLA2G2A|PLA2G2D	-0.5136	1.0894	-1.5462
CPC016_HT29_6H:BRD-K81209512-001-01-3:10	BRD-K81209512	AG-494	HT29	trt_cp	10 uM	6 h	5	164	0.12	0.141855	1	0	1	1	0	EGFR inhibitor|Tyrosine kinase inhibitor	EGFR	-0.5136	1.0894	-1.5461
CPC016_NEU_24H:BRD-K28578425-001-02-1:10	BRD-K28578425	cilostamide	NEU	trt_cp	10 uM	24 h	3	163	0.13	0.147196	0	0	1	1	0	Phosphodiesterase inhibitor	PDE3A|PDE3B	-0.5136	1.0894	-1.546
MOAR001_A375_24H:B24	BRD-A88369366	trelagliptin	A375	trt_cp	1.11 uM	24 h	2	52	0.2946	0.125155	1	1	1	1	0	Dipeptidyl peptidase inhibitor	DPP4	-0.5136	1.0894	-1.546
CPC003_HCC515_24H:BRD-A43882281-001-11-4:10	BRD-A43882281	pinacidil	HCC515	trt_cp	10 uM	24 h	3	97	0.14	0.117837	1	1	1	1	0	ATP channel activator|Potassium channel activator	ABCC9|KCNJ8|ABCC8	-0.5136	1.0894	-1.546
CPC006_HEPG2_6H:BRD-A68631409-001-01-3:10	BRD-A68631409	evodiamine	HEPG2	trt_cp	10 uM	6 h	3	135	0.33	0.213429	1	1	1	1	0	ATPase inhibitor|TRPV agonist	TRPV1	-0.5136	1.0894	-1.5459
REP.B024_HELA_24H:O24	BRD-K79759585	sildenafil	HELA	trt_cp	0.01 uM	24 h	2	92	0.1091	0.101306	1	0	1	1	0	Phosphodiesterase inhibitor	PDE5A|PDE6G|PDE6H|SLCO1B1|SLCO1B3	-0.5136	1.0894	-1.5459
CPC004_HCC515_24H:BRD-K60770992-066-15-1:10	BRD-K60770992	pergolide	HCC515	trt_cp	10 uM	24 h	3	120	0.46	0.237575	1	1	1	1	0	Dopamine receptor agonist	DRD1|DRD2|ADRA2A|ADRA2B|ADRA2C|DRD3|DRD4|DRD5|HTR1A|HTR1B|HTR1D|HTR2A|HTR2B|HTR2C|KCNA5|ADRA1A|ADRA1B|ADRA1D	-0.5135	1.0894	-1.5458
CPC009_PC3_6H:J06	BRD-K39823328	VU-0366037-2	PC3	trt_cp	10 uM	6 h	5	120	0.1271	0.12488	0	0	1	1	0	Glutamate receptor antagonist	GRM4	-0.5135	1.0894	-1.5458
CPC018_PHH_24H:BRD-K48869804-001-01-3:10	BRD-K48869804	icilin	PHH	trt_cp	10 uM	24 h	3	111	0.13	0.121469	0	0	1	1	0	TRPV agonist	TRPA1|TRPM8	-0.5134	1.0893	-1.5455
CPC006_NOMO1_6H:BRD-K92241597-001-02-9:80	BRD-K92241597	tosedostat	NOMO1	trt_cp	80 uM	6 h	2	357	0.11	0.200383	0	0	1	1	0	Peptidase inhibitor	ANPEP|NPEPPS|LAP3	-0.5134	1.0892	-1.5454
CPC015_SKB_24H:BRD-K96263742-001-02-3:10	BRD-K96263742	GW-7647	SKB	trt_cp	10 uM	24 h	2	622	0.74	0.686028	0	0	1	1	0	PPAR receptor agonist	PPARA	-0.5132	1.0863	-1.5449
CPC016_NEU_24H:BRD-K94379058-001-03-5:10	BRD-K94379058	BML-190	NEU	trt_cp	10 uM	24 h	3	107	0.09	0.0992302	0	0	1	1	0	Cannabinoid receptor antagonist	CNR2	-0.5132	1.0855	-1.5448
CPC005_PC3_6H:BRD-K52512893-001-03-0:10	BRD-K52512893	SC-19220	PC3	trt_cp	10 uM	6 h	4	114	0.06	0.0836293	1	0	1	1	0	Prostanoid receptor antagonist	PTGER1	-0.5131	1.0828	-1.5444
REP.B001_YAPC_24H:H01	BRD-A27732521	tolperisone	YAPC	trt_cp	2.22 uM	24 h	2	157	0.2553	0.202444	0	0	1	1	0	Voltage-gated sodium channel blocker	CYP2C19|CYP2B6|CYP2D6	-0.513	1.0824	-1.5443
CPC004_PC3_6H:BRD-K68558722-001-03-2:10	BRD-K68558722	deracoxib	PC3	trt_cp	10 uM	6 h	5	111	0.18	0.142932	1	0	1	1	0	Cyclooxygenase inhibitor	PTGS2	-0.513	1.0821	-1.5442
CRCGN015_MCF10A_48H:BRD-K74190368:10.8115	BRD-K74190368	resorcinol	MCF10A	trt_cp	10 uM	48 h	3	77	0.5	0.198409	1	1	1	1	0	Phosphodiesterase inhibitor	CA12|CA14|CA2|PTGS1	-0.5128	1.0819	-1.5436
REP.B007_YAPC_24H:D09	BRD-K44366189	anacetrapib	YAPC	trt_cp	0.25 uM	24 h	2	59	0.1974	0.109126	1	0	1	1	0	Cholesterol inhibitor	CETP	-0.5127	1.0815	-1.5434
LJP007_HUVEC_24H:J19	BRD-K74065929	doramapimod	HUVEC	trt_cp	10 uM	24 h	3	152	0.3484	0.232697	1	1	1	1	0	P38 MAPK inhibitor	MAPK14|MAPK11|MAPK12|DDR2|MAPK13	-0.5127	1.0817	-1.5434
CPC005_HT29_6H:BRD-A02713983-001-02-0:10	BRD-A02713983	dihydrodeoxygedunin	HT29	trt_cp	10 uM	6 h	2	49	0.21	0.102574	1	0	1	1	0	Growth factor receptor activator	NTRK2	-0.5127	1.0809	-1.5432
LJP005_SKBR3_24H:O13	BRD-K53972329	ruxolitinib	SKBR3	trt_cp	10 uM	24 h	3	127	0.33	0.207009	1	1	1	1	0	JAK inhibitor	JAK1|JAK2|TYK2|JAK3	-0.5125	1.0748	-1.5429
CPC017_HT29_6H:BRD-A49358627-001-03-9:10	BRD-A49358627	ciprofibrate	HT29	trt_cp	10 uM	6 h	5	155	0.19	0.173529	0	0	1	1	0	PPAR receptor agonist	PPARA|LPL	-0.5126	1.0763	-1.5429
LJP009_HME1_24H:L08	BRD-K93123848	RAF-265	HME1	trt_cp	3.33 uM	24 h	3	351	0.5474	0.443238	1	1	1	1	0	RAF inhibitor|VEGFR inhibitor	BRAF|KDR|KIT|PDGFRB|RAF1	-0.5126	1.0784	-1.5429
REP.B018_HELA_24H:M13	BRD-K66538826	amuvatinib	HELA	trt_cp	2.22 uM	24 h	2	89	0.3146	0.169202	1	1	1	1	0	FLT3 inhibitor|KIT inhibitor|PDGFR inhibitor|RAD51 inhibitor|RET tyrosine kinase inhibitor	KIT|FLT3|MET|PDGFRA|AXL|MST1R|RAD51|RET	-0.5124	1.0717	-1.5425
REP.B008_HEK293_24H:N20	BRD-K87278688	armodafinil	HEK293	trt_cp	0.74 uM	24 h	2	72	0.1236	0.0953907	1	0	1	1	0	Adrenergic receptor agonist	ABCB1|CYP1A2|CYP2C19|CYP3A5|SLC6A3	-0.5124	1.0717	-1.5423
LJP006_LNCAP_24H:P18	BRD-K16189898	CHIR-99021	LNCAP	trt_cp	0.04 uM	24 h	2	53	0.5066	0.165692	1	1	1	1	0	GSK inhibitor	CDK1|GSK3A|GSK3B|MAPK1	-0.5123	1.0717	-1.5422
REP.A022_YAPC_24H:H16	BRD-K70912147	CO-102862	YAPC	trt_cp	0.37 uM	24 h	3	174	0.3841	0.261413	1	1	1	1	0	Sodium channel inhibitor	SCN2A|SCN4A|SCN9A	-0.5123	1.0717	-1.5422
CPC006_MCF7_24H:H12	BRD-K06890060	alda-1	MCF7	trt_cp	40 uM	24 h	5	144	0.3089	0.213266	1	0	1	1	0	Aldehyde dehydrogenase activator	ALDH2	-0.5123	1.0717	-1.5422
REP.A010_MCF10A_24H:O08	BRD-A15202882	milnacipran	MCF10A	trt_cp	3.33 uM	24 h	2	36	0.1106	0.0638057	1	1	1	1	0	Serotonin receptor antagonist	SLC6A2|SLC6A4|GRIN1|GRIN2A|GRIN2B|GRIN2C|GRIN2D|GRIN3A|GRIN3B	-0.5123	1.0717	-1.5422
REP.A024_THP1_24H:O24	BRD-K79759585	sildenafil	THP1	trt_cp	0.04 uM	24 h	2	135	0.2578	0.188642	1	1	1	1	0	Phosphodiesterase inhibitor	PDE5A|PDE6G|PDE6H|SLCO1B1|SLCO1B3	-0.5123	1.0717	-1.5421
REP.A023_HELA_24H:E19	BRD-K69116396	sertindole	HELA	trt_cp	10 uM	24 h	3	231	0.478	0.336009	1	1	1	1	0	Dopamine receptor antagonist|Serotonin receptor antagonist	DRD2|HTR2A|HTR2C|ADRA1A|ADRA1B|ADRA1D|DRD3|DRD4|HRH1|HTR1A|HTR1B|HTR1D|HTR1E|HTR1F|HTR6|KCNH2	-0.5122	1.0717	-1.5419
REP.A023_HA1E_24H:O16	BRD-K72951360	valrubicin	HA1E	trt_cp	0.37 uM	24 h	3	229	0.5452	0.357294	1	1	1	1	0	DNA inhibitor|Topoisomerase inhibitor	TOP2A	-0.5122	1.0717	-1.5419
CPC002_PC3_24H:BRD-K88759641-003-01-0:10	BRD-K88759641	EMD-84	PC3	trt_cp	10 uM	24 h	5	108	0.12	0.115115	1	0	1	1	0	Angiotensin receptor antagonist	AGTR1	-0.5122	1.0717	-1.5417
CPC015_A375_6H:BRD-K72726508-001-01-3:10	BRD-K72726508	arcyriaflavin-a	A375	trt_cp	10 uM	6 h	3	124	0.36	0.213645	1	1	1	1	0	CDK inhibitor	CCND1|CDK4|CCNE1|CDK2	-0.5121	1.0717	-1.5415
CPC017_HEPG2_6H:BRD-A98378129-001-01-4:10	BRD-A98378129	talniflumate	HEPG2	trt_cp	10 uM	6 h	3	247	0.46	0.340846	1	1	1	1	0	Cyclooxygenase inhibitor	CLCA1	-0.5121	1.0717	-1.5415
CPC015_NPC_24H:BRD-K38305202-001-08-3:10	BRD-K38305202	domperidone	NPC	trt_cp	10 uM	24 h	4	184	0.24	0.212493	1	0	1	1	0	Dopamine receptor antagonist	DRD2|DRD3|ABCG2|CYP3A5	-0.5121	1.0717	-1.5414
REP.A016_A375_24H:P24	BRD-K64990520	apocynin	A375	trt_cp	0.04 uM	24 h	3	118	0.2157	0.161323	1	1	1	1	0	NADPH inhibitor	NOX3|NOX4	-0.5119	1.0717	-1.5408
CPC006_VCAP_6H:BRD-A73680854-001-01-3:10	BRD-A73680854	PT-630	VCAP	trt_cp	10 uM	6 h	4	72	0.34	0.158211	1	0	1	1	0	Dipeptidyl peptidase inhibitor	DPP4	-0.5118	1.0717	-1.5407
MOAR003_A375_24H:J16	BRD-K83003151	alogliptin	A375	trt_cp	10 uM	24 h	3	318	0.47	0.390925	1	0	1	1	0	Dipeptidyl peptidase inhibitor	DPP4	-0.5118	1.0717	-1.5407
REP.A024_HELA_24H:G19	BRD-K76197012	ulipristal	HELA	trt_cp	10 uM	24 h	3	94	0.1875	0.134244	1	0	1	1	0	Progesterone receptor antagonist	PGR	-0.5118	1.0717	-1.5405
CPC005_PC3_24H:BRD-A62021152-003-01-8:10	BRD-A62021152	WAY-161503	PC3	trt_cp	10 uM	24 h	5	134	0.13	0.133461	1	0	1	1	0	Serotonin receptor agonist	HTR2C	-0.5117	1.0717	-1.5403
CPC006_NCIH508_6H:BRD-A14395271-001-01-5:10	BRD-A14395271	mesoridazine	NCIH508	trt_cp	10 uM	6 h	2	27	0.45	0.11146	1	1	1	1	0	Dopamine receptor antagonist	DRD2|HTR2A	-0.5117	1.0717	-1.5403
CPC011_VCAP_24H:BRD-K66206289-003-17-1:10	BRD-K66206289	lobeline	VCAP	trt_cp	10 uM	24 h	4	64	0.15	0.0990755	1	0	1	1	0	Acetylcholine receptor antagonist	SLC18A2|CHRNA4|CHRNB2|OPRM1|CHRNA10|CHRNA9	-0.5116	1.0717	-1.54
REP.A015_HEK293_24H:I20	BRD-K59013864	AM-24	HEK293	trt_cp	3.33 uM	24 h	3	41	0.1802	0.086916	1	0	1	1	0	Lipoxygenase inhibitor	ALOX5|SELL	-0.5115	1.0717	-1.5396
CPC001_PC3_6H:BRD-A03359064-001-01-5:10	BRD-A03359064	ICI-89406	PC3	trt_cp	10 uM	6 h	4	77	0.04	0.0561185	1	0	1	1	0	Adrenergic receptor antagonist	ADRB1|ADRB2	-0.5114	1.0717	-1.5394
NMH002_NPC_24H:BRD-K79602928-003-15-7:10	BRD-K79602928	metformin	NPC	trt_cp	10 uM	24 h	3	91	0.46	0.206886	1	0	1	1	0	Insulin sensitizer	INS|ACACB|PRKAB1	-0.5114	1.0717	-1.5394
REP.A019_JURKAT_24H:A13	BRD-K44876623	zolpidem	JURKAT	trt_cp	10 uM	24 h	3	115	0.1324	0.124774	0	0	1	1	0	Benzodiazepine receptor agonist	GABRA1|GABRA2|GABRA3	-0.5114	1.0717	-1.5394
CRCGN014_HEPG2_24H:BRD-K05977355:20.8966	BRD-K05977355	fluconazole	HEPG2	trt_cp	20 uM	24 h	2	88	0.1293	0.107863	0	0	1	1	0	Sterol demethylase inhibitor	CYP3A5|CYP3A7|CYP51A1	-0.5111	1.0717	-1.5386
CPC017_HEPG2_6H:BRD-K72024482-001-01-3:10	BRD-K72024482	MRS-1754	HEPG2	trt_cp	10 uM	6 h	3	65	0.16	0.103121	1	0	1	1	0	Adenosine receptor antagonist	ADORA2B	-0.5111	1.0717	-1.5384
REP.B023_HEK293_24H:H22	BRD-K70301876	escitalopram	HEK293	trt_cp	0.08 uM	24 h	2	87	0.0473	0.0648665	1	0	1	1	0	Selective serotonin reuptake inhibitor (SSRI)	SLC6A4|CYP2C19|ADRA1A|CHRM1|HRH1|SLC6A2|SLC6A3	-0.5109	1.0717	-1.5379
CPC005_A375_24H:BRD-K31987754-001-01-2:10	BRD-K31987754	oleylethanolamide	A375	trt_cp	10 uM	24 h	3	97	0.18	0.133614	1	0	1	1	0	Cannabinoid receptor agonist|Glucose dependent insulinotropic receptor agonist|Potassium channel blocker	GPR119	-0.5109	1.0717	-1.5379
CPC006_HEPG2_6H:BRD-K67566344-001-01-8:10	BRD-K67566344	KU-0063794	HEPG2	trt_cp	10 uM	6 h	3	230	0.44	0.321678	1	1	1	1	0	MTOR inhibitor	MTOR	-0.5108	1.0716	-1.5376
CPC018_PHH_24H:BRD-K10843433-001-12-8:10	BRD-K10843433	phenylbutazone	PHH	trt_cp	10 uM	24 h	3	189	0.14	0.164485	0	0	1	1	0	Cyclooxygenase inhibitor|Prostanoid receptor antagonist	PTGS2|PTGS1|PTGIS	-0.5107	1.0714	-1.5375
CPC009_HEPG2_6H:BRD-A34208323-001-01-4:10	BRD-A34208323	VU-0404997-2	HEPG2	trt_cp	10 uM	6 h	3	166	0.41	0.263801	1	1	1	1	0	Glutamate receptor antagonist	GRM4	-0.5107	1.0713	-1.5373
REP.A001_HELA_24H:D19	BRD-A26334849	propafenone	HELA	trt_cp	10 uM	24 h	3	76	0.3016	0.153092	1	1	1	1	0	Antiarrhythmic	SCN5A|KCNH2|KCNK2|KCNK3|ADRB1|ADRB2|KCNA5	-0.5107	1.0713	-1.5373
CPC014_HEPG2_6H:BRD-K01436366-001-02-4:10	BRD-K01436366	XMD-1150	HEPG2	trt_cp	10 uM	6 h	3	239	0.44	0.327911	1	1	1	1	0	LRRK inhibitor	LRRK2	-0.5106	1.0709	-1.5371
REP.A002_HELA_24H:J09	BRD-K17203476	LY-2874455	HELA	trt_cp	1.11 uM	24 h	3	211	0.4674	0.317553	1	1	1	1	0	FGFR inhibitor	FGFR1|FGFR3|FGFR2|FGFR4|KDR	-0.5106	1.0706	-1.537
REP.A003_PC3_24H:E13	BRD-K32405725	etomoxir	PC3	trt_cp	10 uM	24 h	3	187	0.4022	0.277314	1	1	1	1	0	Carnitine palmitoyltransferase inhibitor	CPT1A|CPT1B	-0.5106	1.0706	-1.537
LJP006_HA1E_24H:K23	BRD-K19220233	JNK-9L	HA1E	trt_cp	0.12 uM	24 h	3	78	0.44	0.187329	1	1	1	1	0	JNK inhibitor	MAPK8	-0.5105	1.0651	-1.5366
CPC014_VCAP_24H:BRD-K02965346-001-01-8:10	BRD-K02965346	SU-11274	VCAP	trt_cp	10 uM	24 h	5	241	0.4	0.313956	0	0	1	1	0	HGF receptor inhibitor|Tyrosine kinase inhibitor	MET	-0.5103	1.0555	-1.5361
REP.A003_HELA_24H:F19	BRD-K32821942	azathioprine	HELA	trt_cp	10 uM	24 h	3	216	0.4658	0.320743	1	1	1	1	0	Dehydrogenase inhibitor	PPAT|HPRT1|IMPDH1	-0.5103	1.0555	-1.536
REP.A001_MCF7_24H:J09	BRD-K28667793	pyrazinamide	MCF7	trt_cp	1.11 uM	24 h	3	168	0.3345	0.239708	0	0	1	1	0	Fatty acid synthase inhibitor	FASN	-0.5102	1.0555	-1.5359
REP.A024_MCF10A_24H:O23	BRD-K79759585	sildenafil	MCF10A	trt_cp	0.125 uM	24 h	3	86	0.2491	0.148002	1	1	1	1	0	Phosphodiesterase inhibitor	PDE5A|PDE6G|PDE6H|SLCO1B1|SLCO1B3	-0.5102	1.0555	-1.5359
REP.A013_HELA_24H:M13	BRD-K43164539	cholic-acid	HELA	trt_cp	10 uM	24 h	3	170	0.4289	0.273044	0	0	1	1	0	Bile acid	CES1|FECH|PLA2G1B|ADH1C|COX1|COX2|COX3|COX4I1|COX5A|COX5B|COX6A2|COX6B1|COX6C|COX7A1|COX7B|COX7C|COX8A|ESRRG|FABP6|GPBAR1	-0.5101	1.0555	-1.5357
MOAR004_A375_24H:P04	BRD-K57011718	UK-356618	A375	trt_cp	10 uM	24 h	3	231	0.41	0.311192	1	1	1	1	0	Metalloproteinase inhibitor	MMP3|MMP13|MMP14|MMP2|MMP9	-0.5101	1.0555	-1.5356
CPC005_A549_24H:BRD-A37959677-001-03-7:10	BRD-A37959677	estrone	A549	trt_cp	10 uM	24 h	3	82	0.29	0.155932	1	1	1	1	0	Estrogen receptor agonist|Estrogenic hormone	ESR1|ESR2	-0.51	1.0555	-1.5351
REP.B027_HELA_24H:H20	BRD-K97101532	VX-661	HELA	trt_cp	0.74 uM	24 h	2	69	0.1798	0.112629	1	0	1	1	0	CFTR channel agonist	CFTR	-0.5099	1.0555	-1.5349
LJP006_A549_24H:H12	BRD-K50168500	canertinib	A549	trt_cp	0.04 uM	24 h	2	93	0.5114	0.220522	1	1	1	1	0	EGFR inhibitor	EGFR|ERBB2|ERBB4|AKT1	-0.5098	1.055	-1.5347
REP.B020_HELA_24H:N18	BRD-K48068743	teneligliptin	HELA	trt_cp	0.01 uM	24 h	2	107	0.3012	0.181531	1	1	1	1	0	Dipeptidyl peptidase inhibitor	DPP4	-0.5098	1.0549	-1.5346
ASG002_PC3_24H:K22	BRD-K09951645	dabrafenib	PC3	trt_cp	10 uM	24 h	3	203	0.4598	0.308932	1	1	1	1	0	RAF inhibitor	BRAF|CYP2B6|CYP2C19|CYP2C8|CYP3A4|LIMK1|NEK11|RAF1|SIK1	-0.5098	1.0549	-1.5346
REP.A012_MCF10A_24H:I07	BRD-K02113016	olaparib	MCF10A	trt_cp	10 uM	24 h	3	140	0.2727	0.197577	1	1	1	1	0	PARP inhibitor	PARP1|PARP2|PARP3	-0.5097	1.054	-1.5344
CPC004_HCC515_24H:BRD-A97104540-004-08-5:10	BRD-A97104540	fenoterol	HCC515	trt_cp	10 uM	24 h	3	101	0.4	0.203246	1	1	1	1	0	Adrenergic receptor agonist	ADRB2|ADRB1|ADRB3	-0.5096	1.0418	-1.5339
CPC018_SKB_24H:BRD-K15196155-001-01-5:10	BRD-K15196155	IBC-293	SKB	trt_cp	10 uM	24 h	3	329	0.42	0.375883	1	0	1	1	0	Hydroxycarboxylic acid receptor agonist	HCAR3	-0.5095	1.0418	-1.5336
AICHI001_HBL1_24H:F19	BRD-K13646352	midostaurin	HBL1	trt_cp	10 uM	24 h	3	178	0.48	0.295571	0	0	1	1	0	FLT3 inhibitor|KIT inhibitor|PKC inhibitor	FLT3|KIT|CCNB1|FLT1|KDR|PDGFRB|PRKCA|VEGFA|PRKCG	-0.5094	1.0418	-1.5334
CPC013_VCAP_24H:BRD-K92428232-001-01-5:10	BRD-K92428232	GSK-461364	VCAP	trt_cp	10 uM	24 h	3	387	0.69	0.522529	1	1	1	1	0	PLK inhibitor	PLK1	-0.5094	1.0418	-1.5334
CPC005_MCF7_6H:B08	BRD-K68402494	ML-9	MCF7	trt_cp	10 uM	6 h	4	177	0.1689	0.174836	1	0	1	1	0	Muscle relaxant	TRPC6	-0.5093	1.0418	-1.5332
CPC004_VCAP_24H:O06	BRD-K49519092	immethridine	VCAP	trt_cp	10 uM	24 h	6	151	0.23	0.188444	0	0	1	1	0	Histamine receptor agonist	HRH3	-0.5093	1.0418	-1.5331
CPC003_HA1E_24H:BRD-K34995470-001-02-3:10	BRD-K34995470	SU-1498	HA1E	trt_cp	10 uM	24 h	3	113	0.32	0.192285	1	1	1	1	0	VEGFR inhibitor	ERBB2	-0.5093	1.0418	-1.533
REP.B009_YAPC_24H:F03	BRD-A29520968	acifran	YAPC	trt_cp	0.25 uM	24 h	2	64	0.1496	0.0989433	1	1	1	1	0	Cholesterol inhibitor	HCAR2|HCAR3	-0.5092	1.0418	-1.5329
CPC014_A375_6H:E17	BRD-A45498368	WYE-125132	A375	trt_cp	10 uM	6 h	2	211	0.5394	0.341136	1	1	1	1	0	MTOR inhibitor	MTOR|PIK3CA	-0.5092	1.0418	-1.5327
REP.A025_A549_24H:H04	BRD-K99113996	AZD-2014	A549	trt_cp	0.37 uM	24 h	2	183	0.3868	0.269029	0	0	1	1	0	MTOR inhibitor	MTOR	-0.5092	1.0418	-1.5327
EMU001_NALM6_24H:B24	BRD-A50998626	palomid-529	NALM6	trt_cp	0.01 uM	24 h	3	319	0.364	0.344569	1	0	1	1	0	AKT inhibitor|FGFR inhibitor|MTOR inhibitor|VEGFR inhibitor	MTOR|FGF2	-0.5091	1.0418	-1.5325
CPC014_PHH_24H:BRD-A29901043-001-01-0:10	BRD-A29901043	KIN001-127	PHH	trt_cp	10 uM	24 h	4	217	0.1	0.148957	0	0	1	1	0	ITK inhibitor	ITK	-0.5091	1.0418	-1.5325
REP.B028_MCF7_24H:J23	BRD-K95739795	tetrabenazine	MCF7	trt_cp	0.03 uM	24 h	2	47	0.1415	0.0824627	1	1	1	1	0	Vesicular monoamine transporter inhibitor	SLC18A2|DRD2|SLC18A1	-0.509	1.0418	-1.5323
CPC005_A549_24H:BRD-K31987754-001-01-2:10	BRD-K31987754	oleylethanolamide	A549	trt_cp	10 uM	24 h	3	61	0.18	0.105958	1	0	1	1	0	Cannabinoid receptor agonist|Glucose dependent insulinotropic receptor agonist|Potassium channel blocker	GPR119	-0.509	1.0418	-1.5322
REP.A005_A375_24H:F06	BRD-K08832567	naringenin	A375	trt_cp	0.04 uM	24 h	3	79	0.2507	0.142305	1	1	1	1	0	Aromatase inhibitor|TRPV antagonist	CYP19A1|ESR2|CYP1B1|GLO1|HSD17B1	-0.5089	1.0418	-1.5319
CPC005_A375_24H:BRD-K21936341-051-02-4:10	BRD-K21936341	oxotremorine-sesquifumarate	A375	trt_cp	10 uM	24 h	3	118	0.17	0.143217	1	0	1	1	0	Cholinergic receptor agonist	CHRM2|CHRM1|CHRM3|CHRM4	-0.5087	1.0414	-1.5314
CPC017_A549_6H:BRD-K89997465-001-05-3:10	BRD-K89997465	BRD-K89997465	A549	trt_cp	10 uM	6 h	3	202	0.55	0.337045	1	1	1	1	0	Dopamine receptor antagonist	DRD2|DRD3|DRD4|HTR2A|ADRA2A|ADRA2B|ADRA2C|DRD1|DRD5|HRH1|HTR1A|HTR2C|HTR6|HTR7|KIF11|ADRA1A|ADRA1B|ADRA1D|CALM1|CHRM1|CHRM3|HRH4|HTR2B|KCNH2|ORM1|ORM2|SMPD1|TRPC5	-0.5087	1.0415	-1.5314
CPC005_HCC515_6H:BRD-K89152108-236-04-3:10	BRD-K89152108	liothyronine	HCC515	trt_cp	10 uM	6 h	2	119	0.27	0.181253	1	1	1	1	0	Thyroid hormone stimulant	THRA|THRB	-0.5084	1.0296	-1.5304
REP.A013_HEK293_24H:L20	BRD-K42679050	Y-27152	HEK293	trt_cp	3.33 uM	24 h	3	131	0.0802	0.103646	0	0	1	1	0	Potassium channel activator	KCNJ8	-0.5084	1.0296	-1.5303
REP.A016_MCF10A_24H:I10	BRD-K53963539	vortioxetine	MCF10A	trt_cp	0.37 uM	24 h	2	88	0.4505	0.201335	1	1	1	1	0	Serotonin receptor agonist|Serotonin receptor antagonist	HTR1A|HTR1B|HTR7|SLC6A4|HTR1D|CYP2B6|CYP2C19|CYP2C8|CYP3A5|HTR2A|HTR2C|HTR3A|HTR5A|HTR6	-0.5084	1.0296	-1.5303
PBIOA022_HCC515_24H:N13	BRD-K11540476	EMF-BCA1-64	HCC515	trt_cp	10 uM	24 h	3	82	0.27	0.150459	1	1	1	1	0	Caspase inhibitor	CASP3|STAT1	-0.5083	1.0296	-1.5301
CPC017_A549_6H:BRD-K78637815-001-01-4:10	BRD-K78637815	LY-320135	A549	trt_cp	10 uM	6 h	3	164	0.33	0.235239	1	0	1	1	0	Cannabinoid receptor antagonist	CNR1	-0.5083	1.0296	-1.53
CPC006_H1299_6H:BRD-K41895714-001-02-2:10	BRD-K41895714	AS-605240	H1299	trt_cp	10 uM	6 h	2	113	0.47	0.233034	0	0	1	1	0	PI3K inhibitor	PIK3CG	-0.5083	1.0296	-1.53
CPC017_A549_24H:BRD-K60298136-001-01-7:10	BRD-K60298136	ITE	A549	trt_cp	10 uM	24 h	3	89	0.17	0.12438	1	0	1	1	0	Aryl hydrocarbon receptor agonist	AHR	-0.508	1.0296	-1.5292
CPC016_SKB_24H:BRD-K60274257-001-01-1:10	BRD-K60274257	dephostatin	SKB	trt_cp	10 uM	24 h	3	109	0.43	0.218916	1	1	1	1	0	Tyrosine phosphatase inhibitor	PTPN1|PTPN6	-0.508	1.0296	-1.5291
REP.B017_THP1_24H:C08	BRD-K45542189	diethylcarbamazine	THP1	trt_cp	0.74 uM	24 h	2	91	0.2696	0.158384	1	1	1	1	0	Lipoxygenase inhibitor	ALOX5|PTGS1	-0.508	1.0296	-1.5291
CPC014_A375_6H:L14	BRD-K14681867	somatostatin	A375	trt_cp	10 uM	6 h	2	47	0.0783	0.0613423	1	0	1	1	0	Somatostatin receptor agonist	SSTR1|SSTR2|SSTR3|SSTR4|SSTR5|GH1|GHR|OPRD1|OPRM1	-0.5078	1.0296	-1.5286
CPC011_HT29_6H:BRD-K11630072-001-09-0:10	BRD-K11630072	carmofur	HT29	trt_cp	10 uM	6 h	4	63	0.09	0.0761416	1	0	1	1	0	Thymidylate synthase inhibitor	TYMS	-0.5078	1.0296	-1.5284
PBIOA015_HCC515_24H:N08	BRD-K13044802	ciclopirox	HCC515	trt_cp	3.33 uM	24 h	3	418	0.5834	0.499346	0	0	1	1	0	Membrane integrity inhibitor	ATP1A1	-0.5078	1.0296	-1.5284
CPC003_HCC515_6H:BRD-K54314721-001-04-5:10	BRD-K54314721	zolmitriptan	HCC515	trt_cp	10 uM	6 h	3	141	0.18	0.161093	1	0	1	1	0	Serotonin receptor agonist	HTR1B|HTR1D|HTR1A|HTR1F|HTR1E	-0.5077	1.0296	-1.5282
LJP008_HELA_24H:M15	BRD-K79254416	decitabine	HELA	trt_cp	1.11 uM	24 h	3	84	0.2913	0.158176	1	1	1	1	0	DNA inhibitor	DNMT1|DNMT3A	-0.5076	1.0296	-1.5281
CPC006_A375_24H:BRD-A25004090-001-03-5:4.8	BRD-A25004090	erastin	A375	trt_cp	4 uM	24 h	5	150	0.38	0.241417	1	1	1	1	0	Ion channel antagonist	VDAC2	-0.5076	1.0296	-1.5279
CPC006_U937_6H:BRD-K70642949-001-01-1:0.1	BRD-K70642949	GSK-2334470	U937	trt_cp	0.12 uM	6 h	2	39	0.12	0.0691757	1	0	1	1	0	PDK inhibitor	PDPK1|AURKA|AURKB|PDK1	-0.5075	1.0294	-1.5277
LJP007_YAPC_24H:P07	BRD-K12040459	AT-7867	YAPC	trt_cp	10 uM	24 h	3	268	0.5874	0.401204	1	1	1	1	0	AKT inhibitor	AKT2|ROCK2|GSK3B|PKIA|PRKACA	-0.5073	1.026	-1.5272
LKCP002_MCF7_24H:N11	BRD-K13646352	midostaurin	MCF7	trt_cp	1.11 uM	24 h	5	312	0.4904	0.395533	1	1	1	1	0	FLT3 inhibitor|KIT inhibitor|PKC inhibitor	FLT3|KIT|CCNB1|FLT1|KDR|PDGFRB|PRKCA|VEGFA|PRKCG	-0.5072	1.026	-1.5269
REP.B005_PC3_24H:J07	BRD-K09602097	forskolin	PC3	trt_cp	2.22 uM	24 h	3	178	0.3923	0.267208	1	1	1	1	0	Adenylyl cyclase activator	ADCY2|ADCY5|GNAS	-0.5073	1.026	-1.5269
CPC011_A549_24H:BRD-K73991644-001-05-8:10	BRD-K73991644	isoquercetin	A549	trt_cp	10 uM	24 h	3	265	0.46	0.353047	1	1	1	1	0	Aldose reductase inhibitor	AKR1B1	-0.5072	1.026	-1.5268
REP.A014_HELA_24H:K01	BRD-A58955223	sulforaphane	HELA	trt_cp	10 uM	24 h	3	224	0.4134	0.307709	1	1	1	1	0	Carcinogen|Aryl hydrocarbon receptor antagonist	NFE2L2	-0.5071	1.026	-1.5266
LJP005_SKBR3_24H:J10	BRD-K02965346	SU-11274	SKBR3	trt_cp	0.37 uM	24 h	3	163	0.6	0.316228	1	1	1	1	0	HGF receptor inhibitor|Tyrosine kinase inhibitor	MET	-0.5069	1.026	-1.526
REP.A028_HEK293_24H:A19	BRD-A92537424	danazol	HEK293	trt_cp	10 uM	24 h	2	107	0.1315	0.119946	0	0	1	1	0	Estrogen receptor antagonist|Progesterone receptor agonist	GNRHR|ESR1|CYP2C8|TNF|AR|CCL2|GNRHR2|PGR	-0.5068	1.026	-1.5257
CPC014_VCAP_6H:BRD-K74514084-003-01-9:10	BRD-K74514084	pazopanib	VCAP	trt_cp	10 uM	6 h	5	145	0.11	0.127706	0	0	1	1	0	VEGFR inhibitor|KIT inhibitor|PDGFR inhibitor	KDR|KIT|FLT1|FLT4|PDGFRB|PDGFRA|BRAF|CYP2B6|CYP2C8|CYP2E1|DDR2|CSF1R|FGF1|FGFR1|FGFR3|ITK|SH2B3	-0.5068	1.026	-1.5256
CPC006_NOMO1_6H:BRD-K67566344-001-01-8:10	BRD-K67566344	KU-0063794	NOMO1	trt_cp	10 uM	6 h	2	277	0.22	0.249621	0	0	1	1	0	MTOR inhibitor	MTOR	-0.5068	1.026	-1.5255
CPC014_SKB_24H:BRD-K66956375-001-05-5:10	BRD-K66956375	oleoylethanolamide	SKB	trt_cp	10 uM	24 h	4	103	0.29	0.174762	0	0	1	1	0	Cannabinoid receptor agonist|Glucose dependent insulinotropic receptor agonist|Potassium channel blocker|PPAR receptor agonist	GPR119|PPARA|KCND3|CNR1|GPR55	-0.5067	1.026	-1.5254
CPD002_PC3_6H:BRD-K79425933-001-06-9:10	BRD-K79425933	benperidol	PC3	trt_cp	10 uM	6 h	3	259	0.28	0.272307	0	0	1	1	0	Dopamine receptor antagonist	DRD2	-0.5067	1.026	-1.5253
CPC011_A549_6H:BRD-K57033106-003-15-5:10	BRD-K57033106	tripelennamine	A549	trt_cp	10 uM	6 h	3	192	0.38	0.273132	1	0	1	1	0	Histamine receptor antagonist	HRH1	-0.5067	1.026	-1.5253
REP.B005_HT29_24H:H05	BRD-K09255212	clioquinol	HT29	trt_cp	0.03 uM	24 h	2	91	0.1822	0.130204	0	0	1	1	0	Chelating agent	OPRK1	-0.5066	1.026	-1.5251
REP.A011_A375_24H:C02	BRD-A04352665	maraviroc	A375	trt_cp	3.33 uM	24 h	3	168	0.4383	0.274392	0	0	1	1	0	CC chemokine receptor antagonist	CCR5|CYP3A5	-0.5066	1.026	-1.5251
REP.B018_PC3_24H:B14	BRD-K62200014	anagrelide	PC3	trt_cp	0.74 uM	24 h	2	66	0.3077	0.144101	1	1	1	1	0	Phosphodiesterase inhibitor	PDE3A	-0.5066	1.026	-1.525
PBIOA014_HT29_24H:K22	BRD-K45401373	betulinic-acid	HT29	trt_cp	0.37 uM	24 h	2	68	0.1248	0.093152	1	1	1	1	0	Apoptosis stimulant|Caspase activator|Diacylglycerol O acyltransferase inhibitor|HIV inhibitor|NFKB activator|SARS coronavirus 3C-like protease inhibitor|Topoisomerase inhibitor	GPBAR1|CASP3|CASP8|TOP1	-0.5064	1.0257	-1.5243
PBIOA016_A549_24H:M17	BRD-K22969690	BRD-K22969690	A549	trt_cp	0.125 uM	24 h	3	96	0.3	0.171604	1	1	1	1	0	Bacterial 50S ribosomal subunit inhibitor	CYP2C19|CD55	-0.5063	1.0252	-1.5242
PAC002_U2OS_6H:BRD-K56047318-001-02-2:12.674	BRD-K56047318	RHC-80267	U2OS	trt_cp	12.5 uM	6 h	2	111	0.16	0.134757	0	0	1	1	0	Triacylglycerol lipase inhibitor	LIPC|LIPE|LIPG|DAGLA|DAGLB	-0.5063	1.0244	-1.5241
REP.A007_HA1E_24H:L01	BRD-K53737926	amitriptyline	HA1E	trt_cp	10 uM	24 h	3	273	0.5404	0.388391	1	1	1	1	0	Norepinephrine inhibitor|Norepinephrine reuptake inhibitor|Serotonin receptor antagonist|Serotonin reuptake inhibitor	SLC6A2|SLC6A4|CHRM1|CHRM2|CHRM3|CHRM4|CHRM5|HRH1|HTR6|CYP2C19|CYP3A5|SCN4A|ADRA1A|ADRA1B|ADRA1D|ADRA2A|ADRB1|ADRB2|ADRB3|HRH2|HRH4|HTR1A|HTR1B|HTR1D|HTR2A|HTR2C|HTR7|KCNA1|KCND2|KCND3|KCNQ2|KCNQ3|NTRK1|NTRK2|OPRD1|OPRK1|OPRM1|SIGMAR1	-0.5063	1.024	-1.524
REP.A002_A375_24H:I08	BRD-K17075857	chloroxine	A375	trt_cp	3.33 uM	24 h	3	116	0.2923	0.186198	1	1	1	1	0	Opioid receptor antagonist	OPRK1	-0.5062	1.024	-1.5237
CPC014_SKB_24H:BRD-K85402309-001-01-7:10	BRD-K85402309	dovitinib	SKB	trt_cp	10 uM	24 h	4	322	0.24	0.281102	0	0	1	1	0	EGFR inhibitor|FGFR inhibitor|FLT3 inhibitor|PDGFR inhibitor|VEGFR inhibitor	FGFR1|FLT1|KDR|EGFR|FGFR3|FLT3|FLT4|KIT|PDGFRB|CSF1R|FGFR2|INSR|PDGFRA	-0.5062	1.024	-1.5237
CPC015_ASC_24H:BRD-K59632282-052-02-3:10	BRD-K59632282	quinidine	ASC	trt_cp	10 uM	24 h	4	115	0.13	0.123638	0	0	1	1	0	Sodium channel inhibitor	SCN5A|ABCB1|CYP2D6|KCNA5|KCNA7|KCNH1|KCNH2|KCNH5|KCNK1|KCNK6|SLC29A4	-0.5059	1.024	-1.523
CPC019_HEPG2_6H:BRD-K20197062-001-01-8:10	BRD-K20197062	SA-94315	HEPG2	trt_cp	10 uM	6 h	3	139	0.27	0.195893	1	0	1	1	0	Caspase inhibitor	CASP3	-0.5058	1.024	-1.5226
REP.B013_A549_24H:I16	BRD-K41434598	ORG-9768	A549	trt_cp	0.08 uM	24 h	2	94	0.292	0.167527	1	1	1	1	0	Adrenergic receptor antagonist	SLC6A2|ADRA2A	-0.5058	1.024	-1.5225
CPC018_MCF7_6H:BRD-K39965020-001-03-4:10	BRD-K39965020	doconexent	MCF7	trt_cp	10 uM	6 h	3	107	0.18	0.140333	1	1	1	1	0	PPAR receptor agonist	PPARA|FFAR1|PTGS1|PTGS2	-0.5057	1.024	-1.5223
AICHI001_SKMEL5_24H:C11	BRD-K52751261	TAK-715	SKMEL5	trt_cp	0.04 uM	24 h	3	43	0.22	0.0983504	1	0	1	1	0	P38 MAPK inhibitor	MAPK14|TNF	-0.5057	1.024	-1.5223
CPC016_ASC_24H:BRD-K95609758-001-01-1:10	BRD-K95609758	BMS-191011	ASC	trt_cp	10 uM	24 h	3	74	0.26	0.14026	1	0	1	1	0	Potassium channel activator	KCNMA1	-0.5057	1.024	-1.5222
CPC015_PHH_24H:BRD-K00603606-003-13-3:10	BRD-K00603606	ticlopidine	PHH	trt_cp	10 uM	24 h	2	44	0.03	0.0367382	0	0	1	1	0	Purinergic receptor antagonist	P2RY12|CYP2B6|CYP2C19	-0.5056	1.024	-1.5219
REP.A021_MCF10A_24H:O15	BRD-K86797399	SB-939	MCF10A	trt_cp	1.11 uM	24 h	2	441	0.7001	0.561862	1	1	1	1	0	HDAC inhibitor	HDAC1|HDAC2|HDAC10|HDAC3|HDAC4|HDAC5|HDAC9	-0.5055	1.024	-1.5216
REP.A024_JURKAT_24H:D18	BRD-K74339692	tamsulosin	JURKAT	trt_cp	0.04 uM	24 h	3	98	0.0879	0.0938508	1	0	1	1	0	Adrenergic receptor antagonist	ADRA1A|ADRA1B|ADRA1D	-0.5054	1.024	-1.5214
REP.B023_HEK293_24H:K19	BRD-K71106091	fludarabine-phosphate	HEK293	trt_cp	2.22 uM	24 h	2	121	0.3362	0.203949	1	1	1	1	0	DNA inhibitor|DNA repair enzyme inhibitor|Purine antagonist	POLA1|RRM1|DCK|POLD1|POLE|RRM2|RRM2B	-0.5054	1.024	-1.5214
REP.B016_HEK293_24H:L11	BRD-K54936858	DMP-777	HEK293	trt_cp	0.03 uM	24 h	2	72	0.0935	0.0829665	0	0	1	1	0	Elastase inhibitor	MPO|PI3	-0.5052	1.024	-1.5209
LJP008_HA1E_24H:G01	BRD-K13094524	PFI-1	HA1E	trt_cp	10 uM	24 h	2	326	0.6778	0.475324	1	1	1	1	0	Bromodomain inhibitor	BRD4	-0.5051	1.024	-1.5205
CPC004_VCAP_24H:P04	BRD-K33818169	GW-3965	VCAP	trt_cp	10 uM	24 h	6	282	0.13	0.19361	0	0	1	1	0	LXR agonist|ABC transporter expression enhancer	NR1H2|NR1H3|ABCA1	-0.505	1.024	-1.5201
CPC017_PHH_24H:BRD-K61323504-001-02-4:10	BRD-K61323504	SB-225002	PHH	trt_cp	10 uM	24 h	3	47	0.02	0.0310023	0	0	1	1	0	CC chemokine receptor antagonist	CXCR2	-0.505	1.024	-1.5201
CPC006_A549_6H:BRD-K76703230-001-01-3:0.31	BRD-K76703230	YM-155	A549	trt_cp	0.3 uM	6 h	4	308	0.45	0.376454	1	1	1	1	0	Survivin inhibitor	BIRC5	-0.505	1.024	-1.52
CPC005_MCF7_24H:BRD-K56509348-003-01-3:10	BRD-K56509348	BMS-182874	MCF7	trt_cp	10 uM	24 h	5	212	0.28	0.246364	1	0	1	1	0	Endothelin receptor antagonist	EDNRA	-0.5048	1.024	-1.5197
CPC006_NCIH2073_6H:BRD-K08316444-001-04-3:0.63	BRD-K08316444	rotenone	NCIH2073	trt_cp	0.66 uM	6 h	2	51	0.1	0.072213	0	0	1	1	0	Mitochondrial inhibitor	MT-ND1	-0.5048	1.024	-1.5194
REP.B025_HELA_24H:A16	BRD-K97746869	chlorpropamide	HELA	trt_cp	0.08 uM	24 h	2	165	0.0152	0.0506401	0	0	1	1	0	ATP channel blocker	ABCC8|KCNJ10|KCNJ11	-0.5047	1.024	-1.5192
REP.B020_A549_24H:L09	BRD-K45924332	amrinone	A549	trt_cp	0.25 uM	24 h	2	83	0.1985	0.129793	1	1	1	1	0	Phosphodiesterase inhibitor	PDE3A|PDE3B|PDE4B|TNF	-0.5046	1.024	-1.5191
REP.B016_HEK293_24H:N07	BRD-A43331270	niguldipine	HEK293	trt_cp	2.22 uM	24 h	2	105	0.0896	0.0980797	0	0	1	1	0	Adrenergic receptor antagonist|Calcium channel blocker	ADRA1A|CACNA1C	-0.5044	1.024	-1.5184
CPC015_MCF7_6H:N22	BRD-A35511923	L-803087	MCF7	trt_cp	10 uM	6 h	5	233	0.2286	0.233371	0	0	1	1	0	Somatostatin receptor agonist	SSTR4	-0.5043	1.024	-1.5181
CPC016_NEU_24H:BRD-K62996583-001-03-8:10	BRD-K62996583	lidoflazine	NEU	trt_cp	10 uM	24 h	3	102	0.04	0.0645893	0	0	1	1	0	Calcium channel blocker	SCN1A|SCN3A|SLC29A1	-0.5043	1.024	-1.518
EMU001_KMS34_24H:F11	BRD-A52530684	doxorubicin	KMS34	trt_cp	0.04 uM	24 h	2	115	0.4236	0.223181	1	1	1	1	0	Topoisomerase inhibitor	TOP2A	-0.5042	1.024	-1.5179
PBIOA015_HCC515_24H:I16	BRD-K34022604	clofarabine	HCC515	trt_cp	0.37 uM	24 h	3	603	0.776	0.691704	1	1	1	1	0	Ribonucleoside reductase inhibitor	RRM1|POLA1|RRM2|SLC22A8|POLD1|POLE|RRM2B	-0.5042	1.024	-1.5178
CPC004_HEPG2_6H:BRD-K36055864-001-09-3:10	BRD-K36055864	cycloheximide	HEPG2	trt_cp	10 uM	6 h	3	273	0.46	0.358336	1	1	1	1	0	Protein synthesis inhibitor	GSK3B|RPL3	-0.5042	1.024	-1.5178
LRS001_PHH.MGH_24H:P11	BRD-K27305650	LY-294002	PHH	trt_cp	3.33 uM	24 h	3	152	0.63	0.312912	1	1	1	1	0	MTOR inhibitor|DNA dependent protein kinase inhibitor|Phosphodiesterase inhibitor|PLK inhibitor	MTOR|PIK3CD|PIK3CG|PIK3CA|PLK1|PRKDC|PIK3CB|PDE2A|AKT1|CHEK1|GSK3B|LCK|MAPK1|MAPK11|MAPK12|MAPK14|MAPK8|PRKCA|ROCK1|RPS6KB1|SGK1	-0.5042	1.024	-1.5177
CPC011_PC3_24H:BRD-K74117820-066-08-2:10	BRD-K74117820	nelfinavir	PC3	trt_cp	10 uM	24 h	4	352	0.56	0.448948	1	1	1	1	0	HIV inhibitor	CYP2C19|CYP3A7|CYP3A5|CYP1A2|CYP2B6|CYP2C9|CYP2D6|CYP3A4	-0.5041	1.024	-1.5176
REP.B021_MDAMB231_24H:M10	BRD-K85337334	otilonium	MDAMB231	trt_cp	0.08 uM	24 h	2	93	0.0894	0.0922021	0	0	1	1	0	Acetylcholine receptor antagonist	CACNA1C	-0.5041	1.024	-1.5174
REP.A015_MCF10A_24H:N23	BRD-K60240222	carglumic-acid	MCF10A	trt_cp	0.125 uM	24 h	3	64	0.1327	0.0931871	1	0	1	1	0	Carbamoyl phosphate synthase activator	CPS1	-0.5041	1.024	-1.5174
CPC006_HT29_24H:BRD-A73680854-001-01-3:10	BRD-A73680854	PT-630	HT29	trt_cp	10 uM	24 h	4	145	0.37	0.234215	1	0	1	1	0	Dipeptidyl peptidase inhibitor	DPP4	-0.504	1.024	-1.5173
CPC004_VCAP_24H:B20	BRD-A75552914	isoxicam	VCAP	trt_cp	10 uM	24 h	6	218	0.1	0.1493	0	0	1	1	0	Cyclooxygenase inhibitor	PTGS1|PTGS2	-0.504	1.024	-1.5172
REP.A027_MCF7_24H:E12	BRD-A94756469	digoxin	MCF7	trt_cp	0.04 uM	24 h	2	301	0.4261	0.362134	0	0	1	1	0	Na/K-ATPase inhibitor	ATP1A1|ABCB1|RORC|SLCO1B3	-0.504	1.024	-1.5172
ASG002_PC3_24H:I03	BRD-A88080608	equilin	PC3	trt_cp	0.12 uM	24 h	3	52	0.1614	0.0926369	1	0	1	1	0	Estrogen receptor agonist	HSD17B1	-0.504	1.024	-1.5172
CPD001_PC3_24H:BRD-A48430263-001-04-4:10	BRD-A48430263	pioglitazone	PC3	trt_cp	10 uM	24 h	3	202	0.34	0.265	1	1	1	1	0	PPAR receptor agonist|Insulin sensitizer	PPARG|INS|TRPM3	-0.5038	1.024	-1.5165
CPC013_A375_6H:BRD-K97764662-001-08-2:10	BRD-K97764662	PD-173074	A375	trt_cp	10 uM	6 h	3	140	0.36	0.22701	1	1	1	1	0	FGFR inhibitor|VEGFR inhibitor	FGFR1|FGFR3|FGFR2|FGFR4|FLT1|FLT4|KDR|PDGFRA|PDGFRB	-0.5038	1.024	-1.5165
CPC002_HA1E_6H:BRD-K56596464-004-05-7:10	BRD-K56596464	QX-314	HA1E	trt_cp	10 uM	6 h	3	59	0.2	0.109843	1	0	1	1	0	Sodium channel inhibitor	MAPK14|TGFBR1	-0.5037	1.024	-1.5163
EMU001_OCILY10_24H:D19	BRD-K35458079	edaravone	OCILY10	trt_cp	10 uM	24 h	3	74	0.3453	0.161638	1	0	1	1	0	Nootropic agent	BCL2	-0.5036	1.024	-1.516
CPC011_A549_24H:BRD-K77771411-003-08-1:10	BRD-K77771411	moxonidine	A549	trt_cp	10 uM	24 h	3	182	0.44	0.286149	1	1	1	1	0	Imidazoline receptor agonist	NISCH|ADRA2A|ADRA2B|ADRA2C	-0.5036	1.024	-1.5158
CPC005_A549_24H:BRD-K77793136-003-02-2:10	BRD-K77793136	hydroxyfasudil	A549	trt_cp	10 uM	24 h	3	77	0.18	0.119045	1	0	1	1	0	Rho associated kinase inhibitor	ROCK1|ROCK2|PKIA|PRKACA	-0.5035	1.024	-1.5157
CPC019_HCC515_6H:BRD-K20197062-001-01-8:10	BRD-K20197062	SA-94315	HCC515	trt_cp	10 uM	6 h	3	123	0.18	0.150459	1	0	1	1	0	Caspase inhibitor	CASP3	-0.5035	1.024	-1.5157
PBIOA021_A549_24H:M14	BRD-K59204667	DBeQ	A549	trt_cp	3.33 uM	24 h	3	118	0.2	0.155341	1	1	1	1	0	ATPase inhibitor	CASP3	-0.5035	1.024	-1.5156
REP.B018_MDAMB231_24H:G03	BRD-K63736853	acipimox	MDAMB231	trt_cp	0.25 uM	24 h	2	105	0.1027	0.105005	0	0	1	1	0	Cholesterol inhibitor	HCAR2	-0.5035	1.024	-1.5155
CPC014_A375_6H:K24	BRD-K85402309	dovitinib	A375	trt_cp	10 uM	6 h	2	185	0.4099	0.278455	1	1	1	1	0	EGFR inhibitor|FGFR inhibitor|FLT3 inhibitor|PDGFR inhibitor|VEGFR inhibitor	FGFR1|FLT1|KDR|EGFR|FGFR3|FLT3|FLT4|KIT|PDGFRB|CSF1R|FGFR2|INSR|PDGFRA	-0.5034	1.024	-1.5154
PBIOA016_MCF7_24H:F04	BRD-A06352508	SB-218078	MCF7	trt_cp	0.37 uM	24 h	2	135	0.35	0.219802	1	1	1	1	0	CHK inhibitor	CHEK1	-0.5033	1.024	-1.5152
CPC020_HT29_6H:BRD-K47679368-001-01-5:10	BRD-K47679368	bromfenac	HT29	trt_cp	10 uM	6 h	4	64	0.24	0.125322	1	0	1	1	0	Cyclooxygenase inhibitor	PTGS1|PTGS2	-0.5034	1.024	-1.5152
PBIOA017_HT29_24H:H19	BRD-K76617868	fasudil	HT29	trt_cp	10 uM	24 h	3	225	0.28	0.253805	0	0	1	1	0	Rho associated kinase inhibitor	ROCK1|ROCK2|PKIA|PRKACA	-0.5033	1.024	-1.5151
PBIOA018_HT29_24H:K18	BRD-K34157611	cimetidine	HT29	trt_cp	0.04 uM	24 h	3	115	0.1813	0.146009	1	1	1	1	0	Histamine receptor antagonist	HRH2|SLC29A4|SLC47A1|SLC47A2	-0.5033	1.024	-1.515
CPC017_SKB_24H:BRD-K42452249-001-01-7:10	BRD-K42452249	EO-1428	SKB	trt_cp	10 uM	24 h	2	168	0.63	0.328969	1	1	1	1	0	P38 MAPK inhibitor	MAPK11|MAPK14	-0.5033	1.024	-1.515
CPC018_PHH_24H:BRD-K14965640-001-03-3:10	BRD-K14965640	BRD-K14965640	PHH	trt_cp	10 uM	24 h	3	214	0.22	0.219406	0	0	1	1	0	Cyclooxygenase inhibitor	PTGS2|PTGS1|ASIC1|BCL2|CFTR|FABP2|PLAT|PPARG|SLC5A8|THBD	-0.5033	1.024	-1.5149
LRS001_PHH.MGH_24H:O11	BRD-K37720887	SB-525334	PHH	trt_cp	3.33 uM	24 h	3	148	0.53	0.283204	1	1	1	1	0	TGF-beta receptor inhibitor	TGFBR1	-0.5032	1.024	-1.5148
CPC014_PC3_6H:BRD-U33728988-000-01-6:10	BRD-U33728988	QL-X-138	PC3	trt_cp	10 uM	6 h	4	414	0.62	0.512303	1	1	1	1	0	MTOR inhibitor	BTK|JAK3|MKNK2|MTOR|PRKDC	-0.5031	1.024	-1.5146
CPC016_ASC_24H:BRD-K79116891-003-03-7:10	BRD-K79116891	proxymetacaine	ASC	trt_cp	10 uM	24 h	3	105	0.21	0.150153	1	0	1	1	0	Sodium channel inhibitor	SCN9A|SCN10A|SCN5A	-0.5032	1.024	-1.5146
REP.A001_HELA_24H:H21	BRD-K28217197	ganaxolone	HELA	trt_cp	1.11 uM	24 h	3	111	0.2553	0.170223	1	0	1	1	0	GABA receptor antagonist	GABRA1|GABRA2|GABRA3|GABRA4|GABRA5|GABRA6	-0.5031	1.024	-1.5145
CPC011_A549_24H:BRD-K94649603-001-08-0:10	BRD-K94649603	taxifolin	A549	trt_cp	10 uM	24 h	3	268	0.45	0.351159	1	0	1	1	0	Opioid receptor antagonist	APOB|APP|HMGCR|ADIPOR2	-0.5031	1.024	-1.5144
CPC009_HEPG2_6H:BRD-K83010055-001-01-6:10	BRD-K83010055	VU-0415374-1	HEPG2	trt_cp	10 uM	6 h	3	123	0.2	0.158598	1	0	1	1	0	Glutamate receptor antagonist	GRM4	-0.503	1.024	-1.5143
CPC018_A549_24H:BRD-K24240364-003-02-1:10	BRD-K24240364	GYKI-52466	A549	trt_cp	10 uM	24 h	2	56	0.27	0.124339	0	0	1	1	0	Glutamate receptor antagonist|Kainate receptor antagonist	GRIA1|GRIA2|GRIA3|GRIA4	-0.5029	1.024	-1.5138
CPD001_PC3_24H:BRD-A55424491-001-13-2:10	BRD-A55424491	methotrexate	PC3	trt_cp	10 uM	24 h	3	362	0.54	0.447076	1	1	1	1	0	Dihydrofolate reductase inhibitor	DHFR|AOX1|FOLR1|TYMS	-0.5028	1.024	-1.5137
CPC006_A375_6H:G05	BRD-A81541225	oligomycin-a	A375	trt_cp	10 uM	6 h	3	96	0.283	0.166671	1	1	1	1	0	ATP synthase inhibitor|ATPase inhibitor	ATP5A1	-0.5029	1.024	-1.5137
CPC018_SKB_24H:BRD-K74913225-001-03-3:10	BRD-K74913225	brinzolamide	SKB	trt_cp	10 uM	24 h	3	481	0.09	0.21039	1	0	1	1	0	Carbonic anhydrase inhibitor	CA2|CA7|CA1|CYP2B6|CYP2C8|CA12|CA14|CA4|CA5A	-0.5028	1.024	-1.5135
ISO002_MCF10A.TP53.M_24H:F10	BRD-K28731095	calcitriol	MCF10A	trt_cp	0.37 uM	24 h	2	81	0.4611	0.195421	1	1	1	1	0	Vitamin D receptor agonist	VDR|CYP3A5	-0.5027	1.024	-1.5133
LJP006_A375_24H:M12	BRD-K57080016	selumetinib	A375	trt_cp	0.04 uM	24 h	2	46	0.3383	0.126142	1	1	1	1	0	MEK inhibitor	MAP2K1|MAP2K2	-0.5027	1.0238	-1.5131
CVD001_PHH_6H:BRD-K53523901-001-01-0:2.5	BRD-K53523901	arctigenin	PHH	trt_cp	2.5 uM	6 h	2	135	0.32	0.210171	0	0	1	1	0	MEK inhibitor	ADIPOR1|AHR|CHUK|MAP2K1	-0.5026	1.0234	-1.5129
CPC017_PHH_24H:BRD-K67080878-001-05-5:10	BRD-K67080878	milrinone	PHH	trt_cp	10 uM	24 h	3	270	0.23	0.251986	0	0	1	1	0	Phosphodiesterase inhibitor	PDE3A|PDE2A|PDE3B|PDE5A	-0.5025	1.0206	-1.5126
LIVB002_HUH7_72H:P18	BRD-K30685142	levothyroxine	HUH7	trt_cp	4 uM	72 h	3	168	0.24	0.203044	0	0	1	1	0	Thyroid hormone stimulant	THRA|THRB	-0.5024	1.0154	-1.5123
CPC014_SKB_24H:BRD-K63923597-001-04-3:10	BRD-K63923597	barasertib-HQPA	SKB	trt_cp	10 uM	24 h	4	109	0.17	0.137647	0	0	1	1	0	Aurora kinase inhibitor	AURKB|AURKC|AURKA	-0.5023	1.0142	-1.5121
CPC011_HA1E_6H:BRD-K55055802-001-06-0:10	BRD-K55055802	etomidate	HA1E	trt_cp	10 uM	6 h	2	64	0.06	0.0626608	1	0	1	1	0	Membrane integrity inhibitor|GABA receptor modulator|Membrane permeability inhibitor	GABRA1|GABRA2|GABRA3|GABRA4|GABRA5|GABRA6|GABRB1|GABRB2|GABRB3|GABRD|GABRE|GABRG1|GABRG2|GABRG3|GABRP|GABRQ|ADRA2B	-0.5023	1.0137	-1.512
REP.B020_MCF10A_24H:I09	BRD-A86216746	varenicline	MCF10A	trt_cp	0.25 uM	24 h	2	147	0.2927	0.209749	0	0	1	1	0	Acetylcholine receptor agonist	CHRNA4|CHRNB2|CHRNA3|CHRNA6|CHRNA7	-0.5023	1.0138	-1.512
MOAR006_PC3_24H:H10	BRD-K26818574	BIX-01294	PC3	trt_cp	10 uM	24 h	3	314	0.55	0.42022	1	1	1	1	0	DNA inhibitor|Histone lysine methyltransferase inhibitor	EHMT2|EHMT1	-0.5022	1.0132	-1.5118
CPC011_MCF7_6H:BRD-A44133049-003-04-5:10	BRD-A44133049	azasetron	MCF7	trt_cp	10 uM	6 h	2	51	0.31	0.127144	1	0	1	1	0	Serotonin receptor antagonist	HTR3A|HTR3B	-0.5022	1.013	-1.5117
REP.B011_HEK293_24H:F04	BRD-A05186015	bupropion	HEK293	trt_cp	0.08 uM	24 h	2	141	0.0543	0.088479	0	0	1	1	0	Dopamine receptor antagonist	SLC6A2|SLC6A3|CYP2B6|CHRNA3	-0.5022	1.013	-1.5117
LIVB001_HUH7_72H:I21	BRD-A97701745	pindolol	HUH7	trt_cp	12.5 uM	72 h	3	91	0.24	0.149437	0	0	1	1	0	Adrenergic receptor antagonist	ADRB1|ADRB2|HTR1A|HTR1B|HTR2A|HTR2B	-0.5021	1.0126	-1.5116
REP.B017_MCF10A_24H:D13	BRD-A48430263	pioglitazone	MCF10A	trt_cp	2.22 uM	24 h	2	67	0.1934	0.115106	1	0	1	1	0	PPAR receptor agonist|Insulin sensitizer	PPARG|INS|TRPM3	-0.5021	1.0126	-1.5115
CPC014_A549_6H:BRD-U33728988-000-01-6:10	BRD-U33728988	QL-X-138	A549	trt_cp	10 uM	6 h	3	179	0.36	0.25669	1	1	1	1	0	MTOR inhibitor	BTK|JAK3|MKNK2|MTOR|PRKDC	-0.5021	1.0126	-1.5113
PAC002_U2OS_6H:BRD-K54704028-001-01-3:10	BRD-K54704028	BAY-36-7620	U2OS	trt_cp	10 uM	6 h	2	36	0.35	0.113505	0	0	1	1	0	Glutamate receptor antagonist	GRM1	-0.502	1.0126	-1.5112
CPC014_ASC_24H:BRD-K09790412-001-03-8:10	BRD-K09790412	H-9	ASC	trt_cp	10 uM	24 h	3	121	0.13	0.126822	1	0	1	1	0	PKA inhibitor	PRKACA	-0.502	1.0126	-1.5111
PAC005_U2OS_6H:BRD-A65145453-001-02-0:10	BRD-A65145453	ATPA	U2OS	trt_cp	10 uM	6 h	2	37	0.05	0.0434927	1	0	1	1	0	Glutamate receptor agonist	GRIK1|GRIA2	-0.502	1.0126	-1.511
CPC004_HA1E_24H:BRD-K41713976-300-01-8:10	BRD-K41713976	E-4031	HA1E	trt_cp	10 uM	24 h	3	97	0.14	0.117837	1	0	1	1	0	Potassium channel antagonist	KCNH2|KCNH1	-0.5019	1.0125	-1.5109
MOAR017_HAP1.CDK4_24H:K03	BRD-K51313569	palbociclib	HAP1	trt_cp	3.33 uM	24 h	3	358	0.6301	0.48026	1	1	1	1	0	CDK inhibitor	CDK4|CDK6|CCND3	-0.5019	1.0124	-1.5107
CPC005_HCC515_6H:BRD-K81376179-001-01-4:10	BRD-K81376179	TCS-359	HCC515	trt_cp	10 uM	6 h	2	81	0.06	0.0704934	1	1	1	1	0	FLT3 inhibitor	FLT3	-0.5019	1.0124	-1.5107
ISO002_MCF10A.TP53.M_24H:A12	BRD-K53972329	ruxolitinib	MCF10A	trt_cp	0.04 uM	24 h	2	46	0.2018	0.0974249	1	1	1	1	0	JAK inhibitor	JAK1|JAK2|TYK2|JAK3	-0.5018	1.0122	-1.5105
REP.A015_JURKAT_24H:G04	BRD-K57432881	tiapride	JURKAT	trt_cp	0.37 uM	24 h	2	58	0.0796	0.068707	1	1	1	1	0	Dopamine receptor antagonist	DRD2|DRD3	-0.5018	1.0121	-1.5104
REP.A004_YAPC_24H:C12	BRD-A19661776	mianserin	YAPC	trt_cp	0.04 uM	24 h	3	122	0.1948	0.155885	0	0	1	1	0	Serotonin receptor antagonist	HTR2A|HTR2C|ADRA1A|ADRA1B|ADRA1D|HRH1|HTR2B|HTR6|HTR7|ADRA2A|ADRA2B|ADRA2C|DRD1|DRD2|DRD3|DRD5|HRH2|HRH4|HTR1A|HTR1F|OPRK1|SLC6A2|SLC6A3|SLC6A4	-0.5016	1.012	-1.5099
CPC003_HA1E_6H:BRD-K21565985-001-15-9:10	BRD-K21565985	xylazine	HA1E	trt_cp	10 uM	6 h	2	65	0.6	0.199693	1	1	1	1	0	Adrenergic receptor agonist	ADRA2A|ADRA2B|ADRA2C	-0.5016	1.012	-1.5098
REP.A014_A375_24H:C13	BRD-K57252450	cilengitide	A375	trt_cp	10 uM	24 h	2	126	0.3031	0.19761	1	1	1	1	0	Integrin inhibitor	ITGAV|ITGB3|ITGB5	-0.5016	1.012	-1.5098
REP.B013_HUVEC.A_24H:O23	BRD-K44309363	dexniguldipine	HUVEC	trt_cp	0.03 uM	24 h	2	497	0.1059	0.231983	0	0	1	1	0	Calmodulin inhibitor	CALM1|PRKCA|ADORA3	-0.5015	1.0119	-1.5095
CPC005_VCAP_24H:BRD-K55424922-003-01-0:10	BRD-K55424922	anpirtoline	VCAP	trt_cp	10 uM	24 h	5	130	0.08	0.103121	0	0	1	1	0	Serotonin receptor agonist	HTR1B|HTR3A	-0.5014	1.0113	-1.5092
CPC004_PC3_6H:BRD-K47659338-003-01-0:10	BRD-K47659338	EMD-386088	PC3	trt_cp	10 uM	6 h	5	166	0.17	0.169867	1	0	1	1	0	Serotonin receptor agonist	HTR6	-0.5014	1.0113	-1.5092
PBIOA016_HCC515_24H:G07	BRD-K02113016	olaparib	HCC515	trt_cp	10 uM	24 h	3	138	0.27	0.195187	1	1	1	1	0	PARP inhibitor	PARP1|PARP2|PARP3	-0.5011	1.0098	-1.5085
REP.A025_HA1E_24H:N19	BRD-K79102359	idalopirdine	HA1E	trt_cp	10 uM	24 h	3	127	0.237	0.175431	1	1	1	1	0	Serotonin receptor antagonist	HTR6	-0.5011	1.0092	-1.5084
CPC006_SW480_6H:BRD-A04352665-001-01-2:10	BRD-A04352665	maraviroc	SW480	trt_cp	10 uM	6 h	2	64	0.11	0.0848432	0	0	1	1	0	CC chemokine receptor antagonist	CCR5|CYP3A5	-0.5009	0.9922	-1.5077
REP.B017_HEK293_24H:A17	BRD-A50764878	MDL-73005EF	HEK293	trt_cp	0.03 uM	24 h	2	55	0.1314	0.0859626	1	1	1	1	0	Serotonin receptor antagonist	HTR1A	-0.5008	0.9922	-1.5075
CPC016_SKB_24H:BRD-K12513978-001-16-7:10	BRD-K12513978	fenbufen	SKB	trt_cp	10 uM	24 h	3	83	0.15	0.112828	1	0	1	1	0	Cyclooxygenase inhibitor	PTGS1|PTGS2	-0.5006	0.9922	-1.507
PCLB002_HCC515_24H:BRD-K88742110:10	BRD-K88742110	PCI-34051	HCC515	trt_cp	10 uM	24 h	3	129	0.24	0.177923	0	0	1	1	0	HDAC inhibitor	HDAC8|IL1B|HDAC1|HDAC10|HDAC6	-0.5006	0.9922	-1.5069
LJP009_NPC.TAK_24H:J07	BRD-K79239947	PF-573228	NPC	trt_cp	10 uM	24 h	3	254	0.4768	0.351897	1	1	1	1	0	Focal adhesion kinase inhibitor	CDK1|CDK2|CDK7|GSK3B|IKBKB	-0.5006	0.9922	-1.5069
CPC004_VCAP_24H:E23	BRD-K95309561	dienestrol	VCAP	trt_cp	10 uM	24 h	6	195	0.19	0.194637	0	0	1	1	0	Estrogen receptor agonist	ESR1	-0.5006	0.9922	-1.5068
CRCGN015_MCF10A_48H:BRD-K66808046:33.8241	BRD-K66808046	oxyquinoline	MCF10A	trt_cp	30 uM	48 h	3	80	0.35	0.169204	1	0	1	1	0	Chelating agent	METAP2	-0.5005	0.9922	-1.5066
CPC006_HCC515_24H:L08	BRD-A73680854	PT-630	HCC515	trt_cp	10 uM	24 h	5	121	0.2399	0.172281	1	0	1	1	0	Dipeptidyl peptidase inhibitor	DPP4	-0.5005	0.9922	-1.5065
CPD002_MCF7_24H:BRD-A30815329-001-04-8:10	BRD-A30815329	felodipine	MCF7	trt_cp	10 uM	24 h	3	180	0.46	0.290968	1	1	1	1	0	Calcium channel blocker	CACNA1C|CACNA1D|CACNA1S|NR3C2|CACNA1F|CACNA1H|CACNA2D1|CACNA2D2|CACNB2|CALM1|CFTR|PDE1A|PDE1B|TNNC1|TNNC2	-0.5004	0.9922	-1.5064
TAA001_SHSY5Y_24H:H07	BRD-K48619321	methscopolamine	SHSY5Y	trt_cp	10 uM	24 h	3	171	0.19	0.182266	0	0	1	1	0	Acetylcholine receptor antagonist	CHRM1|CHRM2|CHRM3|HRH1	-0.5004	0.9922	-1.5064
REP.B028_HELA_24H:L21	BRD-A96292436	eflornithine	HELA	trt_cp	0.25 uM	24 h	2	213	0.3608	0.28032	1	1	1	1	0	Ornithine decarboxylase inhibitor	ODC1|ARG2	-0.5004	0.9922	-1.5063
PCL001_A375_24H:BRD-K50498985:0.04	BRD-K50498985	taladegib	A375	trt_cp	0.04 uM	24 h	2	41	0.16	0.0818997	1	1	1	1	0	Smoothened receptor antagonist	DHH|IHH|SMO|PTCH1	-0.5004	0.9922	-1.5062
LJP009_HT29_24H:M22	BRD-K56277358	MGCD-265	HT29	trt_cp	0.37 uM	24 h	2	45	0.1742	0.0895284	1	0	1	1	0	VEGFR inhibitor	MET|KDR|AXL	-0.5003	0.9922	-1.5059
CPC018_PHH_24H:BRD-K17378184-300-03-4:10	BRD-K17378184	BP-897	PHH	trt_cp	10 uM	24 h	3	181	0.19	0.18752	0	0	1	1	0	Dopamine receptor agonist	DRD3|ADRA1A|ADRA1D|ADRA2A|DRD1|DRD2|DRD4|HTR1A|HTR2B	-0.5002	0.9922	-1.5058
REP.B009_HA1E_24H:P10	BRD-K34313798	LY-215490	HA1E	trt_cp	0.08 uM	24 h	2	86	0.1171	0.101475	1	1	1	1	0	Glutamate receptor antagonist	GRIA1|GRIA2|GRIA3|GRIA4|GRIK1	-0.5002	0.9922	-1.5058
CPC015_HEPG2_6H:BRD-A68723818-050-18-4:10	BRD-A68723818	brompheniramine	HEPG2	trt_cp	10 uM	6 h	2	95	0.29	0.167838	0	0	1	1	0	Histamine receptor antagonist	HRH1|CHRM1|CHRM2|CHRM3|CHRM4|CHRM5	-0.5001	0.9922	-1.5055
REP.A025_JURKAT_24H:N23	BRD-K79102359	idalopirdine	JURKAT	trt_cp	0.125 uM	24 h	2	63	0.1909	0.110893	0	0	1	1	0	Serotonin receptor antagonist	HTR6	-0.5001	0.9922	-1.5053
CPC005_HCC515_6H:BRD-K32977963-001-03-5:10	BRD-K32977963	eugenol	HCC515	trt_cp	10 uM	6 h	2	126	0.12	0.124339	1	0	1	1	0	Androgen receptor antagonist	MAOA|AR	-0.5001	0.9922	-1.5053
CPC015_HEPG2_6H:BRD-A36074203-003-03-5:10	BRD-A36074203	remacemide	HEPG2	trt_cp	10 uM	6 h	2	80	0.14	0.107014	0	0	1	1	0	Glutamate receptor antagonist	GRIN1	-0.5	0.9922	-1.5052
REP.B010_HA1E_24H:P23	BRD-A15435692	BMY-14802	HA1E	trt_cp	0.03 uM	24 h	2	115	0.2381	0.167324	1	1	1	1	0	Sigma receptor antagonist	HTR1A|SIGMAR1	-0.5	0.9922	-1.5051
REP.B016_MDAMB231_24H:H02	BRD-A53176877	methylprednisolone	MDAMB231	trt_cp	0.74 uM	24 h	2	222	0.5221	0.344258	1	1	1	1	0	Glucocorticoid receptor agonist	NR3C1	-0.5	0.9922	-1.5051
CPC015_MCF7_24H:BRD-K95885906-001-01-8:10	BRD-K95885906	quercetagetin	MCF7	trt_cp	10 uM	24 h	5	150	0.16	0.156652	1	0	1	1	0	PIM inhibitor	PIM1	-0.5	0.9922	-1.505
NMH002_NEU_6H:BRD-A13946108-001-13-0:10	BRD-A13946108	sulindac	NEU	trt_cp	10 uM	6 h	3	135	0.38	0.229028	0	0	1	1	0	Cyclooxygenase inhibitor	PTGS1|PTGS2|AKR1B1|MAPK3|PPARD|PTGDR2	-0.5	0.9922	-1.505
REP.B022_HELA_24H:O08	BRD-K81957469	semagacestat	HELA	trt_cp	0.74 uM	24 h	2	73	0.2449	0.135203	1	1	1	1	0	Gamma secretase inhibitor	PSEN1	-0.4999	0.9922	-1.5049
PAC005_U2OS_6H:BRD-A84174393-001-02-0:10	BRD-A84174393	meloxicam	U2OS	trt_cp	10 uM	6 h	2	26	0.12	0.0564817	1	0	1	1	0	Cyclooxygenase inhibitor	PTGS2|PTGS1	-0.4999	0.9922	-1.5049
HOG003_MCF7_24H:BRD-A73680854-001-01-3:0.0045	BRD-A73680854	PT-630	MCF7	trt_cp	0.004 uM	24 h	3	124	0.37	0.216592	0	0	1	1	0	Dipeptidyl peptidase inhibitor	DPP4	-0.4999	0.9922	-1.5049
REP.A004_YAPC_24H:M19	BRD-K25630527	LY-2784544	YAPC	trt_cp	10 uM	24 h	3	240	0.314	0.277588	0	0	1	1	0	JAK inhibitor	JAK2|JAK3	-0.4998	0.9922	-1.5046
CRCGN016_MCF10A.WT.HP_24H:BRD-K41731458:11.2186	BRD-K41731458	triclosan	MCF10A	trt_cp	12 uM	24 h	3	133	0.41	0.236128	1	1	1	1	0	Enoyl-[acyl-carrier-protein] reductase [NADH] inhibitor	DNMT1	-0.4998	0.9922	-1.5044
CPC018_MCF7_6H:BRD-K77171813-050-01-4:10	BRD-K77171813	proxyfan	MCF7	trt_cp	10 uM	6 h	3	67	0.17	0.107918	1	0	1	1	0	Histamine receptor antagonist	HRH3	-0.4997	0.9922	-1.5042
REP.A003_PC3_24H:E07	BRD-K32285926	AMG-208	PC3	trt_cp	10 uM	24 h	3	67	0.245	0.129554	1	1	1	1	0	Tyrosine kinase inhibitor	MET	-0.4996	0.9922	-1.504
REP.B019_A375_24H:E18	BRD-K46424862	hymecromone	A375	trt_cp	0.01 uM	24 h	2	65	0.209	0.117858	1	1	1	1	0	Monoamine oxidase inhibitor	MAOA|MAOB	-0.4996	0.9922	-1.5039
CRCGN017_MCF10A.TP53.M_24H:BRD-K32531356:10.9976	BRD-K32531356	ammonium-perfluorocaprylate	MCF10A	trt_cp	10 uM	24 h	3	178	0.38	0.262986	1	1	1	1	0	PIM inhibitor	PIM1	-0.4996	0.9922	-1.5039
CPC015_SKB_24H:BRD-K70914287-300-01-0:10	BRD-K70914287	BIBX-1382	SKB	trt_cp	10 uM	24 h	2	93	0.05	0.0689536	0	0	1	1	0	EGFR inhibitor|Tyrosine kinase inhibitor	EGFR|ERBB2	-0.4995	0.9922	-1.5037
CPC017_A375_6H:BRD-A26845397-001-01-4:10	BRD-A26845397	isamoltane	A375	trt_cp	10 uM	6 h	3	219	0.1	0.149642	0	0	1	1	0	Adrenergic receptor antagonist	ADRB1|ADRB2|HTR1A|HTR1B	-0.4994	0.9922	-1.5034
CPC018_HT29_6H:BRD-K08806317-050-03-6:10	BRD-K08806317	timolol	HT29	trt_cp	10 uM	6 h	5	182	0.37	0.262402	1	1	1	1	0	Adrenergic receptor antagonist	ADRB2|ADRB1	-0.4994	0.9922	-1.5034
CPC018_A549_24H:BRD-K40530731-001-02-5:10	BRD-K40530731	hyoscyamine	A549	trt_cp	10 uM	24 h	2	67	0.03	0.0453345	0	0	1	1	0	Acetylcholine receptor antagonist	CHRM1|CHRM2|CHRM3|CHRM4	-0.4994	0.9922	-1.5034
REP.A028_HT29_24H:M16	BRD-K96862998	pirfenidone	HT29	trt_cp	0.37 uM	24 h	2	148	0.2984	0.212501	0	0	1	1	0	TGF-beta receptor inhibitor	TNF|MAPK14|TNFRSF1A|FURIN	-0.4994	0.9922	-1.5033
REP.A001_A375_24H:H07	BRD-K27955832	lomeguatrib	A375	trt_cp	10 uM	24 h	3	79	0.2789	0.150096	1	1	1	1	0	O6-alkylguanine-DNA alkyltransferase inhibitor	MGMT	-0.4994	0.9922	-1.5032
HOG001_A549_24H:BRD-K75532464-001-01-4:3.33	BRD-K75532464	FTI-276	A549	trt_cp	3.33 uM	24 h	3	95	0.26	0.15892	1	1	1	1	0	Farnesyltransferase inhibitor	FNTA	-0.4993	0.9922	-1.5031
REP.B008_MDAMB231_24H:K17	BRD-K03353589	ecabet	MDAMB231	trt_cp	0.03 uM	24 h	2	94	0.2161	0.144119	1	0	1	1	0	Gastrin inhibitor|Urease inhibitor	CCKBR|GAST|NOXO1	-0.4993	0.9922	-1.5031
REP.B010_YAPC_24H:L08	BRD-K14653796	tasquinimod	YAPC	trt_cp	0.74 uM	24 h	2	87	0.2206	0.140085	1	1	1	1	0	Angiogenesis inhibitor|S100A9 inhibitor	HDAC4|S100A9	-0.4993	0.9922	-1.503
REP.A015_HEK293_24H:H21	BRD-K58114536	rasagiline	HEK293	trt_cp	1.11 uM	24 h	3	94	0.323	0.176196	1	1	1	1	0	Monoamine oxidase inhibitor	MAOB|BCL2	-0.4993	0.9922	-1.5029
REP.B020_HA1E_24H:A15	BRD-A83081521	finasteride	HA1E	trt_cp	0.25 uM	24 h	2	70	0.2539	0.134807	1	1	1	1	0	5-alpha reductase inhibitor	SRD5A2|SRD5A1|AR|AKR1D1	-0.4992	0.9922	-1.5027
LJP009_HUVEC_24H:E07	BRD-K01567962	pyrazolanthrone	HUVEC	trt_cp	10 uM	24 h	3	132	0.3251	0.209472	1	1	1	1	0	JNK inhibitor	MAPK10|MAPK8|MAPK9|TTK|LRRK2|MAPK8IP1	-0.4992	0.9922	-1.5026
REP.A014_MCF10A_24H:G19	BRD-K60341624	GSK-1292263	MCF10A	trt_cp	10 uM	24 h	3	140	0.2436	0.186738	0	0	1	1	0	Glucose dependent insulinotropic receptor agonist	GPR119|GRPR	-0.4992	0.9922	-1.5026
LJP001_BT20_6H:BRD-K99545815-001-02-2:10	BRD-K99545815	PF-562271	BT20	trt_cp	10 uM	6 h	4	601	0.77	0.687881	1	1	1	1	0	Focal adhesion kinase inhibitor	PTK2|PTK2B	-0.4991	0.9922	-1.5024
REP.B011_HEK293_24H:D14	BRD-K04956647	nebivolol	HEK293	trt_cp	0.74 uM	24 h	2	90	0.1453	0.115634	0	0	1	1	0	Adrenergic receptor antagonist	ADRB1|ADRB2	-0.4991	0.9922	-1.5023
REP.B007_HELA_24H:O08	BRD-K60623809	SU-11652	HELA	trt_cp	0.74 uM	24 h	2	70	0.2062	0.121485	0	0	1	1	0	Tyrosine kinase inhibitor	KDR|PDGFRB	-0.4991	0.9922	-1.5023
LKCP002_A549_48H:D14	BRD-K17953908	LY-2886721	A549	trt_cp	1.11 uM	48 h	5	119	0.2934	0.188944	1	0	1	1	0	Beta secretase inhibitor	BACE1|BACE2	-0.499	0.9922	-1.502
REP.B008_HELA_24H:O16	BRD-K89561498	SN-38	HELA	trt_cp	0.08 uM	24 h	2	269	0.4969	0.369693	0	0	1	1	0	Topoisomerase inhibitor	TOP1	-0.4989	0.9922	-1.5017
CPC014_PC3_24H:BRD-K43880410-001-07-8:10	BRD-K43880410	pregnenolone	PC3	trt_cp	10 uM	24 h	5	184	0.35	0.25661	1	0	1	1	0	Glutamate receptor antagonist	PGR|CYP17A1|SULT2B1	-0.4988	0.9922	-1.5016
CPC017_MCF7_6H:BRD-K27737647-300-01-4:10	BRD-K27737647	H-89	MCF7	trt_cp	10 uM	6 h	4	202	0.44	0.301462	1	1	1	1	0	PKA inhibitor	PRKACA|KCNA2|KCNA3|KCNA5|KCNAB2|KCNC1|KCNC2|KCNC3|KCNE1|KCNE2|KCNE3|KCNE4|KCNH1|KCNH2|KCNQ1|KCNQ2|KCNQ3|KCNQ5|KCNS3|GSG2|PKIA	-0.4988	0.9922	-1.5015
REP.A002_YAPC_24H:O24	BRD-K18673820	folic-acid	YAPC	trt_cp	0.04 uM	24 h	2	113	0.1051	0.110197	0	0	1	1	0	Folate receptor ligand	FOLR2|FOLR3|SLC19A1|SLC46A1	-0.4988	0.9922	-1.5015
CPC015_A549_24H:BRD-K95885906-001-01-8:10	BRD-K95885906	quercetagetin	A549	trt_cp	10 uM	24 h	3	216	0.4	0.297226	1	0	1	1	0	PIM inhibitor	PIM1	-0.4988	0.9922	-1.5014
CPC003_HA1E_24H:BRD-K65285700-001-01-5:10	BRD-K65285700	GP-1a	HA1E	trt_cp	10 uM	24 h	3	103	0.21	0.148716	1	1	1	1	0	Cannabinoid receptor agonist	CNR2	-0.4988	0.9922	-1.5014
REP.B018_HEK293_24H:G04	BRD-K63736853	acipimox	HEK293	trt_cp	0.08 uM	24 h	2	85	0.1269	0.10502	0	0	1	1	0	Cholesterol inhibitor	HCAR2	-0.4986	0.9922	-1.5008
REP.A023_YAPC_24H:G19	BRD-K70301465	ibrutinib	YAPC	trt_cp	10 uM	24 h	3	108	0.3834	0.205764	1	1	1	1	0	BTK inhibitor	BTK|BLK|BMX	-0.4985	0.9922	-1.5007
REP.B015_PC3_24H:I08	BRD-K58626373	dexfenfluramine	PC3	trt_cp	0.74 uM	24 h	2	61	0.1713	0.103365	1	1	1	1	0	Serotonin receptor agonist	SLC6A4|HTR2C	-0.4986	0.9922	-1.5007
REP.A028_MDAMB231_24H:L07	BRD-K63750851	BRD-K63750851	MDAMB231	trt_cp	10 uM	24 h	3	334	0.474	0.40234	0	0	1	1	0	Dehydrogenase inhibitor|Inositol monophosphatase inhibitor	IMPDH1|IMPDH2	-0.4985	0.9922	-1.5005
CPD002_PC3_6H:BRD-K25224017-001-19-3:10	BRD-K25224017	pirenperone	PC3	trt_cp	10 uM	6 h	3	124	0.24	0.17444	0	0	1	1	0	Serotonin receptor antagonist	HTR2A|HTR7	-0.4984	0.9922	-1.5004
REP.B008_THP1_24H:N24	BRD-K87278688	armodafinil	THP1	trt_cp	0.01 uM	24 h	2	70	0.1595	0.106846	1	1	1	1	0	Adrenergic receptor agonist	ABCB1|CYP1A2|CYP2C19|CYP3A5|SLC6A3	-0.4984	0.9922	-1.5004
CPC005_HT29_24H:BRD-K80639402-003-01-1:10	BRD-K80639402	SB-258585	HT29	trt_cp	10 uM	24 h	3	97	0.19	0.137276	1	0	1	1	0	Serotonin receptor antagonist	HTR6	-0.4984	0.9922	-1.5004
CRCGN017_MCF10A.TP53.M_24H:BRD-K99946902:33.8241	BRD-K99946902	hexylresorcinol	MCF10A	trt_cp	30 uM	24 h	3	159	0.4	0.255011	1	1	1	1	0	Anesthetic - local	TYR	-0.4985	0.9922	-1.5004
REP.A005_PC3_24H:G22	BRD-K09426783	TAS-103	PC3	trt_cp	0.37 uM	24 h	2	234	0.5582	0.365455	1	1	1	1	0	Topoisomerase inhibitor	TOP1|TOP2A	-0.4984	0.9922	-1.5002
LJP009_HELA_24H:N05	BRD-K68191783	ALW-II-38-3	HELA	trt_cp	0.12 uM	24 h	3	55	0.0814	0.0676588	1	0	1	1	0	Ephrin inhibitor	DDR1	-0.4983	0.9922	-1.5
MOAR004_A375_24H:P10	BRD-K30553453	hesperetin	A375	trt_cp	10 uM	24 h	3	155	0.3	0.21805	1	0	1	1	0	ACAT inhibitor	CYP1B1|DGAT1|MTTP|SOAT1|SOAT2	-0.4983	0.9922	-1.5
CPC018_PHH_24H:BRD-K14765469-003-02-3:10	BRD-K14765469	vesamicol	PHH	trt_cp	10 uM	24 h	3	85	0.1	0.0932266	0	0	1	1	0	Acetylcholinesterase inhibitor	SLC18A3	-0.4983	0.9922	-1.4999
REP.B004_A375_24H:G01	BRD-K21908111	AZD-1208	A375	trt_cp	2.22 uM	24 h	3	156	0.3617	0.240197	1	1	1	1	0	PIM inhibitor	PIM1|PIM2|PIM3	-0.4983	0.9922	-1.4999
CPC011_VCAP_24H:BRD-A49172652-001-23-0:10	BRD-A49172652	lansoprazole	VCAP	trt_cp	10 uM	24 h	5	544	0.48	0.516714	1	1	1	1	0	Proton pump inhibitor	ATP4A|CYP2C19|CYP3A4|CYP3A5|ATP4B	-0.4983	0.9922	-1.4999
REP.A020_A549_24H:E10	BRD-K85833139	dehydroepiandrosterone	A549	trt_cp	0.37 uM	24 h	3	150	0.2081	0.178654	0	0	1	1	0	Protein synthesis stimulant	AR|CYP3A5|ESR1|ESR2|G6PD|GABRA1|GABRA2|GABRA3|GABRA4|GABRA5|GABRA6|GABRB1|GABRB2|GABRB3|GABRD|GABRE|GABRG1|GABRG2|GABRG3|GABRP|GABRQ|GRIN1|GRIN2A|GRIN2B|GRIN2C|GRIN2D|GRIN3A|GRIN3B|HSD17B1|NR1I2|NR1I3|PPARA|SIGMAR1|SULT2A1|SULT2B1	-0.4982	0.9922	-1.4997
CPC006_VCAP_6H:BRD-A81541225-001-02-7:10	BRD-A81541225	oligomycin-a	VCAP	trt_cp	10 uM	6 h	4	126	0.3	0.196597	1	0	1	1	0	ATP synthase inhibitor|ATPase inhibitor	ATP5A1	-0.4981	0.9922	-1.4995
CPC009_MCF7_24H:BRD-A19736161-001-03-4:10	BRD-A19736161	ondansetron	MCF7	trt_cp	10 uM	24 h	2	131	0.1	0.115735	0	0	1	1	0	Serotonin receptor antagonist	HTR3A|CYP2D6|CYP3A5|HTR1A|HTR1B|HTR3B|HTR4|OPRM1	-0.498	0.9922	-1.4992
REP.B005_MCF7_24H:F18	BRD-K08976401	azelaic-acid	MCF7	trt_cp	0.01 uM	24 h	2	77	0.1544	0.110255	0	0	1	1	0	Tyrosinase inhibitor	TYR|TXNRD1|TXNRD2|AKR1D1|SRD5A2	-0.498	0.9921	-1.4991
LJP008_THP1_24H:A22	BRD-K54256913	MK-1775	THP1	trt_cp	0.37 uM	24 h	3	152	0.3452	0.231626	1	1	1	1	0	WEE1 kinase inhibitor	WEE1	-0.4979	0.992	-1.4988
REP.A013_PC3_24H:N01	BRD-K42981054	mibampator	PC3	trt_cp	10 uM	24 h	2	195	0.4609	0.303146	0	0	1	1	0	Glutamate receptor antagonist	GRIA1	-0.4978	0.9918	-1.4986
CPC004_PC3_6H:BRD-A29426959-050-07-4:10	BRD-A29426959	carbinoxamine	PC3	trt_cp	10 uM	6 h	5	291	0.15	0.211263	1	0	1	1	0	Histamine receptor antagonist|Calcium channel blocker	HRH1	-0.4977	0.9908	-1.4981
CPC014_HCC515_6H:BRD-K74514084-003-01-9:10	BRD-K74514084	pazopanib	HCC515	trt_cp	10 uM	6 h	3	139	0.3	0.20649	1	1	1	1	0	VEGFR inhibitor|KIT inhibitor|PDGFR inhibitor	KDR|KIT|FLT1|FLT4|PDGFRB|PDGFRA|BRAF|CYP2B6|CYP2C8|CYP2E1|DDR2|CSF1R|FGF1|FGFR1|FGFR3|ITK|SH2B3	-0.4976	0.9906	-1.498
CPD003_PC3_24H:BRD-K53342282-001-01-4:10	BRD-K53342282	cortisol	PC3	trt_cp	10 uM	24 h	2	146	0.13	0.139309	1	0	1	1	0	Glucocorticoid receptor agonist	NR3C1	-0.4976	0.9907	-1.498
LKCP002_U2OS_6H:D14	BRD-K17953908	LY-2886721	U2OS	trt_cp	1.11 uM	6 h	4	77	0.1961	0.124255	0	0	1	1	0	Beta secretase inhibitor	BACE1|BACE2	-0.4976	0.9904	-1.4979
CPC016_A549_6H:BRD-K53913732-001-01-8:10	BRD-K53913732	SB-408124	A549	trt_cp	10 uM	6 h	2	91	0.13	0.109982	0	0	1	1	0	Orexin receptor antagonist	HCRTR1|HCRTR2	-0.4976	0.9903	-1.4978
REP.A007_HT29_24H:C09	BRD-K43802723	AMG-837	HT29	trt_cp	1.11 uM	24 h	3	91	0.3114	0.17022	0	0	1	1	0	Fatty acid receptor agonist	FFAR1	-0.4975	0.9898	-1.4977
CPC005_A375_6H:BRD-K34685430-050-06-7:10	BRD-K34685430	BRD-K34685430	A375	trt_cp	10 uM	6 h	3	140	0.35	0.223835	1	1	1	1	0	Dopamine receptor antagonist|Serotonin receptor antagonist	DRD1|HTR1E|HTR1F|HTR2A|HTR2B|HTR2C	-0.4975	0.9898	-1.4977
REP.A009_THP1_24H:E09	BRD-K29530284	amlexanox	THP1	trt_cp	1.11 uM	24 h	2	75	0.0994	0.0873081	1	1	1	1	0	Histamine receptor antagonist	FGF1|IL3|PDE4A|PDE4B|PDE4C|PDE4D|S100A12|S100A13	-0.4975	0.9896	-1.4976
REP.A005_A549_24H:M02	BRD-A10903566	imiloxan	A549	trt_cp	3.33 uM	24 h	3	109	0.1911	0.14594	0	0	1	1	0	Adrenergic receptor antagonist	ADRA2B|ADRA2A	-0.4975	0.9896	-1.4976
REP.A028_HEK293_24H:D18	BRD-A93000692	ciglitazone	HEK293	trt_cp	0.04 uM	24 h	2	107	0.0507	0.0744777	0	0	1	1	0	PPAR receptor agonist	PPARG|INS	-0.4975	0.9896	-1.4976
CPC014_HA1E_6H:BRD-K77390737-001-03-2:10	BRD-K77390737	xanthohumol	HA1E	trt_cp	10 uM	6 h	3	220	0.11	0.157303	1	0	1	1	0	ATPase inhibitor	VCP	-0.4975	0.9896	-1.4976
CPD001_MCF7_6H:E10	BRD-K00673382	famotidine	MCF7	trt_cp	10 uM	6 h	3	75	0.0457	0.0591997	1	1	1	1	0	Histamine receptor antagonist	HRH2	-0.4975	0.9891	-1.4974
CPC006_A375_24H:BRD-K01868942-001-02-1:160	BRD-K01868942	RS-23597-190	A375	trt_cp	150 uM	24 h	5	162	0.39	0.254168	1	1	1	1	0	Serotonin receptor antagonist	HTR4	-0.4973	0.9879	-1.4971
CPC006_VCAP_6H:BRD-K89391146-001-02-3:80	BRD-K89391146	RG-108	VCAP	trt_cp	80 uM	6 h	4	174	0.28	0.223195	1	0	1	1	0	DNA inhibitor	DNMT1|DNMT3B	-0.4973	0.9876	-1.4969
CPC003_PC3_24H:BRD-K63533170-001-01-1:10	BRD-K63533170	AM-630	PC3	trt_cp	10 uM	24 h	5	170	0.13	0.150323	1	0	1	1	0	Cannabinoid receptor antagonist	CNR2|CNR1	-0.4971	0.9876	-1.4965
REP.B005_HA1E_24H:G24	BRD-K09426783	TAS-103	HA1E	trt_cp	0.01 uM	24 h	3	228	0.4946	0.339567	1	1	1	1	0	Topoisomerase inhibitor	TOP1|TOP2A	-0.4971	0.9876	-1.4964
CPC009_HT29_6H:BRD-K74501079-001-13-2:10	BRD-K74501079	azithromycin	HT29	trt_cp	10 uM	6 h	3	42	0.04	0.0414462	1	0	1	1	0	Bacterial 50S ribosomal subunit inhibitor	MLNR	-0.4971	0.9876	-1.4962
CPC006_THP1_6H:G02	BRD-K16406336	methylene-blue	THP1	trt_cp	10 uM	6 h	2	114	0.2957	0.185656	0	0	1	1	0	Nitric oxide production inhibitor|Guanylyl cyclase inhibitor|Monoamine oxidase inhibitor|Tau aggregation inhibitor	ACHE|MAPT	-0.4968	0.9876	-1.4955
CPC001_PC3_6H:BRD-K11911061-003-02-8:10	BRD-K11911061	GR-127935	PC3	trt_cp	10 uM	6 h	4	249	0.35	0.298514	1	1	1	1	0	Serotonin receptor antagonist	HTR1B|HTR1D|HTR1A|HTR2A|HTR2C|HTR1E|HTR1F|HTR2B|HTR6	-0.4968	0.9876	-1.4955
REP.A017_HT29_24H:O15	BRD-K67080878	milrinone	HT29	trt_cp	1.11 uM	24 h	2	103	0.1387	0.120861	1	1	1	1	0	Phosphodiesterase inhibitor	PDE3A|PDE2A|PDE3B|PDE5A	-0.4968	0.9876	-1.4954
HOG003_A549_6H:BRD-A91699651-316-06-7:10	BRD-A91699651	chloroquine	A549	trt_cp	10 uM	6 h	3	170	0.43	0.273394	1	1	1	1	0	Antimalarial	CYP2C8|GSTA2|MRGPRX1|TLR9|TNF	-0.4968	0.9876	-1.4954
CPC006_NCIH2073_6H:BRD-K56343971-001-02-3:10	BRD-K56343971	vemurafenib	NCIH2073	trt_cp	10 uM	6 h	2	124	0.28	0.188417	0	0	1	1	0	RAF inhibitor	BRAF|CYP2C19|CYP3A4|CYP3A5|RAF1	-0.4967	0.9876	-1.4951
EMU001_OCILY10_24H:K22	BRD-K08109215	I-BET-762	OCILY10	trt_cp	0.125 uM	24 h	3	130	0.4297	0.238993	1	1	1	1	0	Bromodomain inhibitor	BRD2|BRD3|BRD4|APOA1	-0.4966	0.9876	-1.495
CPC020_HT29_6H:BRD-K49519144-001-01-2:10	BRD-K49519144	LY-2140023	HT29	trt_cp	10 uM	6 h	4	69	0.12	0.0920123	1	0	1	1	0	Glutamate receptor agonist	GRM3|GRM2	-0.4966	0.9876	-1.4948
CPC016_NEU_24H:BRD-K18909381-001-01-4:10	BRD-K18909381	CGS-12066B	NEU	trt_cp	10 uM	24 h	3	216	0.1	0.148613	0	0	1	1	0	Serotonin receptor agonist	HTR1B	-0.4965	0.9876	-1.4946
REP.B009_A375_24H:A23	BRD-K28307902	flutamide	A375	trt_cp	0.03 uM	24 h	2	90	0.1567	0.120084	0	0	1	1	0	Androgen receptor antagonist	AR|CYP2C19|AHR	-0.4965	0.9876	-1.4946
REP.B013_HEK293_24H:M19	BRD-K43457670	acetazolamide	HEK293	trt_cp	2.22 uM	24 h	2	111	0.2169	0.1569	1	1	1	1	0	Carbonic anhydrase inhibitor	CA14|CA2|CA1|CA4|CA12|CA7|CA13|CA6|AQP1|CA3	-0.4965	0.9876	-1.4945
CPC013_HCC515_6H:BRD-K64785675-001-01-6:10	BRD-K64785675	TG-100115	HCC515	trt_cp	10 uM	6 h	3	209	0.37	0.281193	1	0	1	1	0	PI3K inhibitor	PIK3CG|PIK3CA|PIK3CB|PIK3CD	-0.4964	0.9876	-1.4944
REP.A013_A375_24H:D19	BRD-K38183498	clonazepam	A375	trt_cp	10 uM	24 h	3	125	0.2765	0.187989	0	0	1	1	0	GABA receptor agonist	GABRA1|GABRA2|GABRA3|GABRA5|GABRA4|GABRA6|GABRB1|GABRB2|GABRB3|GABRD|GABRE|GABRG1|GABRG2|GABRG3|GABRP|GABRQ|TSPO	-0.4964	0.9876	-1.4944
CPC014_NEU_24H:BRD-K24859147-379-01-8:10	BRD-K24859147	KIN001-242	NEU	trt_cp	10 uM	24 h	2	149	0.39	0.243756	0	0	1	1	0	Protein kinase inhibitor	RPS6KA3	-0.4964	0.9876	-1.4942
NMH001_NEU_6H:L16	BRD-K12807006	kaempferol	NEU	trt_cp	10 uM	6 h	3	97	0.204	0.142243	0	0	1	1	0	Bone resorption inhibitor|Estrogen receptor agonist	ESRRA|ESRRG|JAK3|PTGS1|STAT6|XDH|AKR1B1|ALOX15B|ALOX5|AR|CYP1B1|GLO1|HSD17B1|UGT3A1	-0.4964	0.9876	-1.4942
CPC018_SKB_24H:BRD-K17796732-001-02-0:10	BRD-K17796732	JWH-015	SKB	trt_cp	10 uM	24 h	3	121	0.07	0.093062	1	0	1	1	0	Cannabinoid receptor agonist	CNR2	-0.4963	0.9876	-1.4941
CPC013_NEU_24H:BRD-K31283835-001-01-9:10	BRD-K31283835	tofacitinib	NEU	trt_cp	10 uM	24 h	2	121	0.24	0.172317	0	0	1	1	0	JAK inhibitor	JAK3|JAK1|JAK2|CYP2C19|TYK2	-0.4963	0.9876	-1.4939
CPC020_A549_6H:BRD-K67977190-066-01-5:10	BRD-K67977190	eprosartan	A549	trt_cp	10 uM	6 h	2	104	0.34	0.190146	0	0	1	1	0	Angiotensin receptor antagonist	AGTR1	-0.4962	0.9876	-1.4938
REP.B021_MCF7_24H:L09	BRD-K84783599	riociguat	MCF7	trt_cp	0.25 uM	24 h	2	93	0.2633	0.158233	1	0	1	1	0	Guanylate cyclase activator	GUCY1A3|GUCY1B3|GUCY1A2|GUCY1B2	-0.4962	0.9876	-1.4936
REP.B019_MCF10A_24H:M16	BRD-K49807096	benazepril	MCF10A	trt_cp	0.08 uM	24 h	2	116	0.3789	0.211993	1	1	1	1	0	ACE inhibitor	ACE	-0.4962	0.9876	-1.4936
LJP009_HUVEC_24H:J07	BRD-K79239947	PF-573228	HUVEC	trt_cp	10 uM	24 h	3	137	0.3285	0.214515	1	1	1	1	0	Focal adhesion kinase inhibitor	CDK1|CDK2|CDK7|GSK3B|IKBKB	-0.4961	0.9876	-1.4935
REP.B018_HEK293_24H:I04	BRD-K64622987	torcetrapib	HEK293	trt_cp	0.08 uM	24 h	2	127	0.1476	0.138444	0	0	1	1	0	Cholesteryl ester transfer protein inhibitor	CETP	-0.4961	0.9876	-1.4935
LJP005_PC3_24H:F13	BRD-K95435023	PHA-665752	PC3	trt_cp	10 uM	24 h	2	158	0.2905	0.216637	0	0	1	1	0	MET inhibitor	MET	-0.4961	0.9876	-1.4934
CPC006_MCF7_24H:H11	BRD-K48923948	BMS-641988	MCF7	trt_cp	12 uM	24 h	5	105	0.2631	0.168068	1	0	1	1	0	Androgen receptor antagonist	AR	-0.4961	0.9876	-1.4934
LJP005_PC3_24H:F06	BRD-K79090631	CGP-60474	PC3	trt_cp	0.04 uM	24 h	2	128	0.3337	0.208984	1	1	1	1	0	CDK inhibitor	CDK1|CDK2	-0.4961	0.9876	-1.4933
REP.A017_HA1E_24H:G19	BRD-K63675182	triflupromazine	HA1E	trt_cp	10 uM	24 h	3	299	0.5583	0.413143	1	1	1	1	0	Dopamine receptor antagonist	DRD2|HTR2B|CHRNA7|CHRM1|CHRM2|DRD1	-0.496	0.9876	-1.4931
CPC016_SKB_24H:BRD-K69600043-328-03-0:10	BRD-K69600043	thiethylperazine	SKB	trt_cp	10 uM	24 h	3	317	0.09	0.170797	1	0	1	1	0	Dopamine receptor antagonist	DRD1|DRD2|DRD4	-0.4959	0.9876	-1.4929
CPC015_HEPG2_6H:BRD-K95237249-001-15-8:10	BRD-K95237249	probenecid	HEPG2	trt_cp	10 uM	6 h	2	83	0.16	0.116528	0	0	1	1	0	Uricosuric	SLC22A6|SLC22A11|SLC22A8|ABCC1|TRPV2|PANX1|SLCO1C1	-0.4959	0.9876	-1.4927
REP.A008_HT29_24H:G08	BRD-K73691377	alprostadil	HT29	trt_cp	3.33 uM	24 h	2	94	0.3389	0.18048	0	0	1	1	0	Prostanoid receptor agonist	PTGER1|PTGER2|CATSPER1|CATSPER2|CATSPER3|CATSPER4|PTGDR|PTGER4|PTGIR	-0.4958	0.9876	-1.4925
AICHI002_THP1_24H:K12	BRD-K21680192	mitoxantrone	THP1	trt_cp	0.01 uM	24 h	3	182	0.4757	0.297531	1	1	1	1	0	Topoisomerase inhibitor	TOP2A|PIM1	-0.4957	0.9876	-1.4922
CPC016_A549_6H:BRD-K53523901-001-02-8:10	BRD-K53523901	arctigenin	A549	trt_cp	10 uM	6 h	2	88	0.22	0.140696	0	0	1	1	0	MEK inhibitor	ADIPOR1|AHR|CHUK|MAP2K1	-0.4956	0.9876	-1.492
LJP007_HUVEC_24H:L04	BRD-K37720887	SB-525334	HUVEC	trt_cp	0.37 uM	24 h	3	202	0.438	0.300776	1	1	1	1	0	TGF-beta receptor inhibitor	TGFBR1	-0.4956	0.9876	-1.4919
CPC018_PHH_24H:BRD-A02006392-001-09-9:10	BRD-A02006392	nitrendipine	PHH	trt_cp	10 uM	24 h	3	57	0.15	0.0935004	0	0	1	1	0	Calcium channel blocker	CACNA1C|CACNA1D|CACNA2D1|CACNA1H|CACNA1S|CACNA2D2|CACNB2|CACNG1|KCNN4	-0.4956	0.9876	-1.4917
CPC018_MCF7_24H:BRD-K22385716-001-01-7:10	BRD-K22385716	LY-303511	MCF7	trt_cp	10 uM	24 h	4	237	0.36	0.295363	1	1	1	1	0	Casein kinase inhibitor|PI3K inhibitor	CSNK2A1|CSNK2A2|CSNK2B|MTOR|BRD2|BRD3|BRD4	-0.4954	0.9876	-1.4912
REP.B025_HT29_24H:I21	BRD-K75641298	metoclopramide	HT29	trt_cp	0.25 uM	24 h	2	127	0.343	0.211047	0	0	1	1	0	Dopamine receptor antagonist|Serotonin receptor antagonist	DRD2|HTR4|HTR3A|CHRM1|HTR3B	-0.4954	0.9876	-1.4912
REP.A025_PC3_24H:M13	BRD-K78303961	glycitein	PC3	trt_cp	10 uM	24 h	2	100	0.2815	0.169656	1	0	1	1	0	TNF inhibitor	TNF|APP|IL1B	-0.4954	0.9876	-1.4911
REP.B018_A375_24H:E18	BRD-A63310107	miglitol	A375	trt_cp	0.01 uM	24 h	2	75	0.1449	0.105413	1	1	1	1	0	Glucosidase inhibitor	GAA|MGAM|SLC5A4|GANAB|GANC	-0.4953	0.9876	-1.4909
REP.A015_MDAMB231_24H:L07	BRD-K59331299	voglibose	MDAMB231	trt_cp	10 uM	24 h	2	58	0.2889	0.130894	1	1	1	1	0	Glucosidase inhibitor	GAA|MGAM	-0.4953	0.9876	-1.4909
REP.A013_YAPC_24H:D13	BRD-K37991163	paroxetine	YAPC	trt_cp	10 uM	24 h	3	119	0.242	0.171598	1	1	1	1	0	Selective serotonin reuptake inhibitor (SSRI)	SLC6A4|CHRM1|CHRM2|CHRM3|CHRM4|CHRM5|HTR2A|SLC6A2	-0.4953	0.9876	-1.4908
REP.A021_JURKAT_24H:L03	BRD-K84698278	agomelatine	JURKAT	trt_cp	1.11 uM	24 h	3	139	0.0676	0.0980192	0	0	1	1	0	Melatonin receptor agonist|Serotonin receptor antagonist	MTNR1A|HTR2C|MTNR1B|CYP1A2|CYP2C19|HTR2A|HTR2B	-0.4952	0.9876	-1.4906
CPC014_PC3_24H:BRD-A80574334-001-01-9:10	BRD-A80574334	oxalomalic-acid	PC3	trt_cp	10 uM	24 h	5	183	0.28	0.228894	0	0	1	1	0	Isocitrate dehydrogenase inhibitor	ACO1|IDH1	-0.4951	0.9876	-1.4905
NMH002_NEU_6H:BRD-K58550667-001-04-6:10	BRD-K58550667	FK-866	NEU	trt_cp	10 uM	6 h	3	87	0.28	0.157823	0	0	1	1	0	Niacinamide phosphoribosyltransferase inhibitor	NAMPT|PARP1	-0.4952	0.9876	-1.4905
REP.B014_HT29_24H:L06	BRD-K59325863	delanzomib	HT29	trt_cp	0.01 uM	24 h	2	148	0.2772	0.204813	1	1	1	1	0	Proteasome inhibitor	CMA1|CTSG|CYP3A4|ELANE	-0.4951	0.9876	-1.4903
MOAR006_PC3_24H:I10	BRD-K36739687	stemregenin-1	PC3	trt_cp	10 uM	24 h	3	175	0.33	0.243	1	1	1	1	0	Aryl hydrocarbon receptor antagonist	AHR	-0.4951	0.9876	-1.4902
REP.A021_A549_24H:D13	BRD-K81694556	VTP-27999	A549	trt_cp	10 uM	24 h	3	105	0.169	0.1347	0	0	1	1	0	Renin inhibitor	REN	-0.495	0.9876	-1.49
REP.A022_MDAMB231_24H:P24	BRD-K82746043	navitoclax	MDAMB231	trt_cp	0.04 uM	24 h	3	237	0.299	0.269178	0	0	1	1	0	BCL inhibitor	BCL2|BCL2L1|BCL2L2	-0.4949	0.9876	-1.4899
REP.B025_HT29_24H:K20	BRD-K77625799	vandetanib	HT29	trt_cp	0.74 uM	24 h	2	103	0.2601	0.165508	0	0	1	1	0	EGFR inhibitor|RET tyrosine kinase inhibitor|VEGFR inhibitor	EGFR|KDR|RET|FLT1|FLT4|PTK6|TEK|FLT3|KIT|EPHA1|EPHA10|EPHA2|EPHA3|EPHA4|EPHA5|EPHA6|EPHA7|EPHA8|EPHB1|EPHB2|EPHB3|EPHB4|EPHB6|ERBB2|ERBB3|ERBB4|SRC|VEGFA	-0.4948	0.9876	-1.4895
LKCP001_U2OS_6H:L22	BRD-K07857022	alvimopan	U2OS	trt_cp	10 uM	6 h	4	207	0.2284	0.219869	1	1	1	1	0	Opioid receptor antagonist	OPRM1|OPRD1|OPRK1	-0.4948	0.9876	-1.4894
PBIOA019_PC3_24H:P01	BRD-K33425534	exemestane	PC3	trt_cp	10 uM	24 h	3	342	0.44	0.392256	1	1	1	1	0	Aromatase inhibitor	CYP19A1	-0.4947	0.9876	-1.4893
MOAR007_PC3_24H:K14	BRD-K81074237	azilsartan	PC3	trt_cp	3.33 uM	24 h	3	136	0.16	0.149163	1	1	1	1	0	Angiotensin receptor antagonist	AGTR1|AGTR2|INS	-0.4947	0.9876	-1.4891
CPC016_NPC_24H:BRD-K94270326-004-01-0:10	BRD-K94270326	ecopipam	NPC	trt_cp	10 uM	24 h	4	164	0.09	0.12285	0	0	1	1	0	Dopamine receptor antagonist	DRD1|DRD5	-0.4947	0.9876	-1.4891
REP.B020_MCF7_24H:D19	BRD-K84996356	AZD-3514	MCF7	trt_cp	2.22 uM	24 h	2	139	0.3712	0.22969	1	1	1	1	0	Drugs Acting on Androgen Receptor	AR	-0.4946	0.9876	-1.4889
CPC018_PHH_24H:BRD-K75641298-001-01-5:10	BRD-K75641298	metoclopramide	PHH	trt_cp	10 uM	24 h	3	128	0.44	0.239973	0	0	1	1	0	Dopamine receptor antagonist|Serotonin receptor antagonist	DRD2|HTR4|HTR3A|CHRM1|HTR3B	-0.4946	0.9876	-1.4887
LIVB002_HUH7_72H:J16	BRD-A34255068	rolipram	HUH7	trt_cp	12 uM	72 h	3	145	0.15	0.149128	0	0	1	1	0	Phosphodiesterase inhibitor	PDE4A|PDE4B|PDE4D|PDE4C	-0.4945	0.9876	-1.4886
REP.B027_THP1_24H:I13	BRD-K97564742	mepyramine	THP1	trt_cp	2.22 uM	24 h	2	80	0.0417	0.0584041	1	1	1	1	0	Histamine receptor antagonist	HRH1	-0.4945	0.9876	-1.4885
CPC017_PHH_24H:BRD-K60184833-001-03-1:10	BRD-K60184833	TYRPHOSTIN-46	PHH	trt_cp	10 uM	24 h	3	117	0.2	0.154682	0	0	1	1	0	Tyrosine kinase inhibitor	EGFR	-0.4944	0.9876	-1.4883
REP.A010_MCF10A_24H:G01	BRD-A13133631	BRD-A13133631	MCF10A	trt_cp	10 uM	24 h	2	56	0.2625	0.1226	1	1	1	1	0	Glucocorticoid receptor agonist	NR3C1	-0.4943	0.9876	-1.488
CPC006_NOMO1_6H:BRD-K69840642-001-01-4:10	BRD-K69840642	ISOX	NOMO1	trt_cp	10 uM	6 h	2	344	0.44	0.393402	1	1	1	1	0	HDAC inhibitor	HDAC6	-0.4943	0.9876	-1.488
MOAR002_A375_24H:P05	BRD-K48812570	macitentan	A375	trt_cp	3.33 uM	24 h	3	384	0.61	0.489397	1	1	1	1	0	Endothelin receptor antagonist	EDNRA|EDNRB	-0.4943	0.9876	-1.4878
CPC006_A549_6H:BRD-K08478539-001-02-1:10	BRD-K08478539	SMER-28	A549	trt_cp	10 uM	6 h	4	86	0.18	0.12581	1	1	1	1	0	Autophagy inducer	SNCA	-0.4943	0.9876	-1.4878
CPC003_HA1E_6H:BRD-K70505054-001-02-9:10	BRD-K70505054	ranitidine	HA1E	trt_cp	10 uM	6 h	2	79	0.66	0.230896	1	1	1	1	0	Histamine receptor antagonist	HRH2|SLC22A2	-0.4942	0.9876	-1.4876
CEGS001_NPC.179_24H:K17	BRD-K71879491	tretinoin	NPC	trt_cp	1.67 uM	24 h	3	194	0.47	0.305338	1	1	1	1	0	Retinoid receptor agonist|Retinoid receptor ligand	RARG|RORB|RARA|RARB|ALDH1A1|ALDH1A2|GPRC5A|NR0B1|NR2C2|PPARD|RARRES1|RORC|RXRB|RXRG	-0.4942	0.9876	-1.4876
CPC011_VCAP_24H:BRD-K53857191-001-16-9:10	BRD-K53857191	risperidone	VCAP	trt_cp	10 uM	24 h	5	105	0.29	0.176451	1	0	1	1	0	Dopamine receptor antagonist|Serotonin receptor antagonist	DRD2|HTR2A|DRD3|HTR2C|ADRA1A|ADRA1B|DRD4|HRH1|HTR1A|HTR1D|CYP3A5|ADRA1D|ADRA2A|ADRA2B|ADRA2C|DRD1|HTR1B|HTR1E|HTR1F|HTR6|HTR7	-0.4941	0.9876	-1.4875
LJP005_PC3_24H:H11	BRD-K03449891	foretinib	PC3	trt_cp	0.12 uM	24 h	2	62	0.2092	0.115161	1	1	1	1	0	VEGFR inhibitor	KDR|MET|AXL|FLT3|KIT|MST1R|TEK|FLT1|FLT4	-0.4941	0.9876	-1.4874
REP.B018_MDAMB231_24H:B21	BRD-K62310379	fluticasone-propionate	MDAMB231	trt_cp	0.25 uM	24 h	2	360	0.4132	0.389998	0	0	1	1	0	Glucocorticoid receptor agonist	NR3C1|PGR|CYP3A5|CYP3A7|NR3C2|PLA2G4A	-0.4941	0.9876	-1.4874
LJP008_A549_24H:M16	BRD-K79254416	decitabine	A549	trt_cp	0.37 uM	24 h	2	117	0.3317	0.199203	1	1	1	1	0	DNA inhibitor	DNMT1|DNMT3A	-0.4941	0.9876	-1.4874
CPC018_A375_6H:BRD-K43978949-075-01-7:10	BRD-K43978949	PIT	A375	trt_cp	10 uM	6 h	5	136	0.06	0.0913431	0	0	1	1	0	Purinergic receptor antagonist	P2RY1	-0.4941	0.9876	-1.4874
REP.B022_HUVEC.A_24H:N01	BRD-A69815203	cyclosporin-a	HUVEC	trt_cp	2.22 uM	24 h	2	110	0.1728	0.139412	0	0	1	1	0	Calcineurin inhibitor	PPIA|PPP3CA	-0.4941	0.9876	-1.4874
EMU001_HBL1_24H:I13	BRD-K71035033	masitinib	HBL1	trt_cp	10 uM	24 h	3	75	0.3728	0.169083	1	1	1	1	0	KIT inhibitor|PDGFR inhibitor|Src inhibitor	KIT|FGFR3|LYN|PDGFRB|PDGFRA	-0.4941	0.9876	-1.4874
CPC011_VCAP_24H:BRD-K81916719-001-10-5:10	BRD-K81916719	triclabendazole	VCAP	trt_cp	10 uM	24 h	5	337	0.51	0.419209	1	1	1	1	0	Tubulin inhibitor	DNMT1	-0.4941	0.9876	-1.4874
REP.A003_A375_24H:I14	BRD-A34006693	suprofen	A375	trt_cp	3.33 uM	24 h	3	64	0.2036	0.115428	1	0	1	1	0	Cyclooxygenase inhibitor	PTGS1|PTGS2	-0.4941	0.9876	-1.4873
REP.B024_A549_24H:O17	BRD-K79595931	bavisant	A549	trt_cp	0.03 uM	24 h	2	118	0.248	0.172981	1	1	1	1	0	Histamine receptor antagonist	HRH3	-0.494	0.9876	-1.4872
LJP007_HEK293_24H:H16	BRD-K26838195	AST-1306	HEK293	trt_cp	0.37 uM	24 h	2	67	0.222	0.123323	1	0	1	1	0	EGFR inhibitor	EGFR|ERBB2|ERBB4	-0.494	0.9876	-1.4872
PBIOA017_HT29_24H:I19	BRD-K74514084	pazopanib	HT29	trt_cp	10 uM	24 h	3	300	0.38	0.341415	0	0	1	1	0	VEGFR inhibitor|KIT inhibitor|PDGFR inhibitor	KDR|KIT|FLT1|FLT4|PDGFRB|PDGFRA|BRAF|CYP2B6|CYP2C8|CYP2E1|DDR2|CSF1R|FGF1|FGFR1|FGFR3|ITK|SH2B3	-0.494	0.9876	-1.4871
ISO002_HCT116.TP53.HR_24H:K11	BRD-K21680192	mitoxantrone	HCT116	trt_cp	0.125 uM	24 h	3	171	0.5599	0.312884	1	1	1	1	0	Topoisomerase inhibitor	TOP2A|PIM1	-0.494	0.9876	-1.487
CPC018_ASC_24H:BRD-A56012032-001-05-6:10	BRD-A56012032	thiorphan	ASC	trt_cp	10 uM	24 h	3	331	0.22	0.27287	1	0	1	1	0	Membrane integrity inhibitor	MME	-0.494	0.9876	-1.487
PBIOA015_PC3_24H:C01	BRD-K92041145	O6-benzylguanine	PC3	trt_cp	10 uM	24 h	3	256	0.25	0.255812	1	1	1	1	0	O6-alkylguanine-DNA alkyltransferase inhibitor	MGMT	-0.4939	0.9876	-1.4869
CPC018_PHH_24H:BRD-K05361803-001-01-3:10	BRD-K05361803	SC-10	PHH	trt_cp	10 uM	24 h	3	131	0.36	0.219592	0	0	1	1	0	Protein kinase activator	PRKCA	-0.494	0.9876	-1.4869
CPC003_HCC515_24H:BRD-K59632282-052-02-3:10	BRD-K59632282	quinidine	HCC515	trt_cp	10 uM	24 h	3	73	0.22	0.128145	1	1	1	1	0	Sodium channel inhibitor	SCN5A|ABCB1|CYP2D6|KCNA5|KCNA7|KCNH1|KCNH2|KCNH5|KCNK1|KCNK6|SLC29A4	-0.4939	0.9876	-1.4868
CPC006_H1299_6H:BRD-K19796430-001-01-5:10	BRD-K19796430	sonidegib	H1299	trt_cp	10 uM	6 h	2	87	0.3	0.163362	0	0	1	1	0	Smoothened receptor antagonist	SMO	-0.4938	0.9876	-1.4864
PAC003_U2OS_6H:BRD-K36021395-300-01-6:10	BRD-K36021395	ABT-702	U2OS	trt_cp	10 uM	6 h	2	99	0.31	0.177145	1	0	1	1	0	Adenosine kinase inhibitor	ADK	-0.4937	0.9876	-1.4863
CPC011_A549_24H:BRD-K59456551-002-15-8:10	BRD-K59456551	methotrexate	A549	trt_cp	10 uM	24 h	3	243	0.41	0.319173	1	1	1	1	0	Dihydrofolate reductase inhibitor	DHFR|AOX1|FOLR1|TYMS	-0.4937	0.9876	-1.4861
REP.A019_MDAMB231_24H:N07	BRD-A49765801	BRD-A49765801	MDAMB231	trt_cp	10 uM	24 h	3	351	0.5674	0.451262	0	0	1	1	0	Glucocorticoid receptor agonist	NR3C1|SERPINA6	-0.4936	0.9875	-1.486
CPC005_A375_24H:BRD-A72988804-001-03-8:10	BRD-A72988804	tiaprofenic-acid	A375	trt_cp	10 uM	24 h	3	104	0.17	0.134453	1	0	1	1	0	Cyclooxygenase inhibitor	PTGS2|PTGS1	-0.4936	0.9873	-1.4859
CPC006_HA1E_24H:J22	BRD-K02526760	QS-11	HA1E	trt_cp	10 uM	24 h	3	105	0.3672	0.198553	1	1	1	1	0	ARFGAP inhibitor	ARFGAP1	-0.4936	0.9872	-1.4858
REP.B005_A375_24H:F18	BRD-K08976401	azelaic-acid	A375	trt_cp	0.01 uM	24 h	3	97	0.2786	0.166229	1	1	1	1	0	Tyrosinase inhibitor	TYR|TXNRD1|TXNRD2|AKR1D1|SRD5A2	-0.4935	0.9865	-1.4856
CPC018_SKB_24H:BRD-A50311610-300-06-2:10	BRD-A50311610	meclizine	SKB	trt_cp	10 uM	24 h	3	85	0.1	0.0932266	1	0	1	1	0	Constitutive androstane receptor (CAR) agonist	NR1I3|HRH1	-0.4935	0.9855	-1.4854
CPC001_PC3_24H:C17	BRD-K94689771	pinocembrin	PC3	trt_cp	10 uM	24 h	5	133	0.1722	0.153029	1	0	1	1	0	CYP1B1 inhibitor	AR|SRD5A1|SRD5A2|CYP1B1	-0.4933	0.979	-1.4849
CPC015_NPC_24H:BRD-K49111258-003-16-4:10	BRD-K49111258	prazosin	NPC	trt_cp	10 uM	24 h	4	180	0.33	0.246447	1	0	1	1	0	Adrenergic receptor antagonist	ADRA1A|ADRA1B|ADRA1D|ADRA2A|ADRA2B|ADRA2C|CDK1|KCNH2|KCNH6|KCNH7	-0.4933	0.9784	-1.4848
LJP009_HEK293_24H:M05	BRD-K72703948	ZM-447439	HEK293	trt_cp	0.12 uM	24 h	3	158	0.3854	0.249526	1	1	1	1	0	Aurora kinase inhibitor	AURKA|AURKB	-0.4932	0.9672	-1.4846
REP.A018_THP1_24H:L14	BRD-K65781196	avanafil	THP1	trt_cp	3.33 uM	24 h	2	152	0.1249	0.139326	0	0	1	1	0	Phosphodiesterase inhibitor	PDE5A	-0.4932	0.9674	-1.4846
CPC004_PC3_6H:BRD-K34014345-001-03-4:10	BRD-K34014345	naproxol	PC3	trt_cp	10 uM	6 h	5	100	0.13	0.115293	1	0	1	1	0	Anti-inflammatory	PTGS1|PTGS2	-0.4932	0.9675	-1.4846
REP.A026_A549_24H:H08	BRD-K90195324	bazedoxifene	A549	trt_cp	3.33 uM	24 h	2	109	0.1782	0.140928	0	0	1	1	0	Selective estrogen receptor modulator (SERM)	ESR1|ESR2	-0.4931	0.9659	-1.4845
CPC003_PC3_24H:BRD-K70241288-001-01-1:10	BRD-K70241288	L-692585	PC3	trt_cp	10 uM	24 h	5	202	0.26	0.231736	1	0	1	1	0	Growth hormone releasing peptide ligand agonist	GHSR	-0.4931	0.966	-1.4845
LJP007_YAPC_24H:E05	BRD-K43002773	GDC-0068	YAPC	trt_cp	0.12 uM	24 h	3	49	0.2295	0.107231	1	1	1	1	0	AKT inhibitor	AKT1|AKT2|AKT3|CYP3A5|PRKG1	-0.4931	0.9657	-1.4844
CPC001_HCC515_24H:BRD-K64044582-001-02-8:10	BRD-K64044582	linoleamide	HCC515	trt_cp	10 uM	24 h	3	203	0.5	0.322154	1	1	1	1	0	ACAT inhibitor	SOAT1|SOAT2	-0.493	0.9652	-1.4841
REP.B013_HT29_24H:M22	BRD-K43457670	acetazolamide	HT29	trt_cp	0.08 uM	24 h	2	34	0.2322	0.0898465	0	0	1	1	0	Carbonic anhydrase inhibitor	CA14|CA2|CA1|CA4|CA12|CA7|CA13|CA6|AQP1|CA3	-0.493	0.9649	-1.484
CPC011_HT29_6H:BRD-K71430621-001-02-3:10	BRD-K71430621	clobenpropit	HT29	trt_cp	10 uM	6 h	4	69	0.13	0.0957694	1	0	1	1	0	Histamine receptor antagonist	HRH3|HRH4|HRH1|HRH2	-0.493	0.965	-1.484
REP.A028_PC3_24H:K24	BRD-K96123349	brequinar	PC3	trt_cp	0.04 uM	24 h	2	188	0.342	0.256403	0	0	1	1	0	Dihydroorotate dehydrogenase inhibitor	DHODH	-0.4929	0.964	-1.4838
CPC014_HA1E_6H:BRD-A80775386-001-01-9:10	BRD-A80775386	hyperforin	HA1E	trt_cp	10 uM	6 h	3	169	0.3	0.227685	1	1	1	1	0	Cyclooxygenase inhibitor|Dopamine uptake inhibitor|Interleukin inhibitor|Lipoxygenase inhibitor|Serotonin reuptake inhibitor	NR1I2|ALOX5|PTGS1	-0.4928	0.9629	-1.4835
REP.A018_HT29_24H:B24	BRD-K62310379	fluticasone-propionate	HT29	trt_cp	0.04 uM	24 h	3	177	0.2414	0.209019	0	0	1	1	0	Glucocorticoid receptor agonist	NR3C1|PGR|CYP3A5|CYP3A7|NR3C2|PLA2G4A	-0.4928	0.9624	-1.4834
CPC017_ASC_24H:BRD-A15435692-003-01-5:10	BRD-A15435692	BMY-14802	ASC	trt_cp	10 uM	24 h	4	68	0.18	0.111872	1	0	1	1	0	Sigma receptor antagonist	HTR1A|SIGMAR1	-0.4928	0.9619	-1.4833
CPC014_HCC515_6H:BRD-K50720187-050-04-1:10	BRD-K50720187	flupirtine	HCC515	trt_cp	10 uM	6 h	3	290	0.11	0.180603	1	0	1	1	0	Glutamate receptor antagonist	KCNQ2|KCNQ3|ADRA2A|KCNQ1	-0.4927	0.9609	-1.4832
REP.B022_A549_24H:J06	BRD-K71289571	zafirlukast	A549	trt_cp	0.01 uM	24 h	2	127	0.1871	0.155872	0	0	1	1	0	Leukotriene receptor antagonist	CYSLTR1|CYSLTR2	-0.4927	0.9614	-1.4832
REP.B026_HELA_24H:F04	BRD-K89162000	tandutinib	HELA	trt_cp	0.08 uM	24 h	2	52	0.078	0.0643991	1	0	1	1	0	FLT3 inhibitor|KIT inhibitor|PDGFR inhibitor	FLT3|KIT|PDGFRA|PDGFRB|CSF1R|PDGFD	-0.4927	0.9602	-1.4831
CPC011_A549_24H:BRD-K10670311-001-12-2:10	BRD-K10670311	sulfasalazine	A549	trt_cp	10 uM	24 h	3	130	0.35	0.215693	1	0	1	1	0	Antirheumatic drug|NFKB inhibitor	PTGS1|PTGS2|ALOX5|ACAT1|CHUK|IKBKB|PLA2G1B|PPARG|SLC46A1|SLC7A11|TBXAS1	-0.4927	0.9598	-1.483
REP.A025_MCF10A_24H:I08	BRD-K74717603	etravirine	MCF10A	trt_cp	3.33 uM	24 h	3	98	0.2473	0.157418	1	0	1	1	0	Non-nucleoside reverse transcriptase inhibitor	CYP2C19|CYP3A4|CYP2C9	-0.4926	0.9591	-1.4829
REP.B019_MCF10A_24H:O12	BRD-K50422030	clomethiazole	MCF10A	trt_cp	0.01 uM	24 h	2	58	0.2058	0.110476	1	1	1	1	0	GABA receptor antagonist|GABA receptor modulator	GABRA1	-0.4926	0.9591	-1.4829
REP.B005_PC3_24H:H24	BRD-K09471561	levofloxacin	PC3	trt_cp	0.01 uM	24 h	3	120	0.2475	0.174264	1	1	1	1	0	Bacterial DNA Gyrase inhibitor	TOP2A	-0.4926	0.9588	-1.4828
ERG011_VCAP_6H:BRD-K57080016-001-09-2:10	BRD-K57080016	selumetinib	VCAP	trt_cp	10 uM	6 h	2	41	0.21	0.0938279	1	0	1	1	0	MEK inhibitor	MAP2K1|MAP2K2	-0.4925	0.9588	-1.4826
LJP005_HCC515_24H:J19	BRD-K03063480	PF-477736	HCC515	trt_cp	10 uM	24 h	3	357	0.6	0.467994	1	1	1	1	0	CHK inhibitor	CHEK1|CHEK2	-0.4924	0.9588	-1.4824
REP.B028_A375_24H:F03	BRD-A93424738	dexamethasone-acetate	A375	trt_cp	0.25 uM	24 h	2	180	0.4506	0.28798	1	1	1	1	0	Glucocorticoid receptor agonist|Corticosteroid agonist|Cytochrome P450 inhibitor	NR3C1	-0.4925	0.9588	-1.4824
LIVB002_HUH7_72H:E20	BRD-K17016787	estriol	HUH7	trt_cp	12 uM	72 h	3	130	0.14	0.136416	0	0	1	1	0	Estrogen receptor agonist	ESR1|ESR2	-0.4924	0.9588	-1.4823
REP.A016_MDAMB231_24H:A09	BRD-K81672972	dinoprost	MDAMB231	trt_cp	1.11 uM	24 h	3	111	0.3001	0.184555	1	1	1	1	0	Prostacyclin analog	PTGFR|PTGDR|PTGER1|PTGER3|PTGER4|PTGDR2|PTGER2|PTGIR|TBXA2R	-0.4923	0.9588	-1.4821
REP.A020_JURKAT_24H:H20	BRD-K82928847	ACY-1215	JURKAT	trt_cp	3.33 uM	24 h	2	295	0.4322	0.361064	0	0	1	1	0	HDAC inhibitor	HDAC6|HDAC1|HDAC2|HDAC3|HDAC8	-0.4923	0.9588	-1.4819
REP.B010_HELA_24H:H09	BRD-A13188892	doxazosin	HELA	trt_cp	0.25 uM	24 h	2	117	0.3284	0.19821	1	1	1	1	0	Adrenergic receptor antagonist	ADRA1D|ADRA1A|ADRA1B|CYP2C19|KCNH2|KCNH6|KCNH7	-0.4922	0.9588	-1.4818
REP.A024_YAPC_24H:A19	BRD-A73741725	exemestane	YAPC	trt_cp	10 uM	24 h	3	102	0.2241	0.15288	1	1	1	1	0	Aromatase inhibitor	CYP19A1	-0.4921	0.9588	-1.4815
CPC007_MCF7_24H:BRD-A82096673-001-04-4:10	BRD-A82096673	KU-C103428N	MCF7	trt_cp	10 uM	24 h	5	176	0.21	0.1944	1	0	1	1	0	CDC inhibitor|Rho associated kinase inhibitor	NFE2	-0.4922	0.9588	-1.4815
REP.B009_MCF10A_24H:M05	BRD-K32977963	eugenol	MCF10A	trt_cp	0.03 uM	24 h	2	45	0.1083	0.0705913	1	1	1	1	0	Androgen receptor antagonist	MAOA|AR	-0.4921	0.9588	-1.4812
LJP005_MDAMB231_3H:N18	BRD-K81528515	nilotinib	MDAMB231	trt_cp	0.04 uM	3 h	2	59	0.4805	0.170256	1	1	1	1	0	Bcr-Abl inhibitor|Abl inhibitor	ABL1|KIT|BCR|CYP2B6|CYP2C8|DDR1|DDR2|PDGFRA	-0.4919	0.9588	-1.4808
LRS001_PHH.MGH_24H:F13	BRD-K03109492	NSC-663284	PHH	trt_cp	10 uM	24 h	3	79	0.42	0.184191	1	1	1	1	0	CDC inhibitor	CDC25A|CDC25B|CDC25C	-0.4919	0.9588	-1.4807
CPC005_A549_24H:BRD-K93188295-300-01-4:10	BRD-K93188295	ARC-239	A549	trt_cp	10 uM	24 h	3	77	0.34	0.163612	1	1	1	1	0	Adrenergic receptor antagonist	ADRA2B|ADRA2A|ADRA2C	-0.4918	0.9588	-1.4805
REP.A010_YAPC_24H:D22	BRD-K12867552	PCI-24781	YAPC	trt_cp	0.37 uM	24 h	2	193	0.4384	0.294134	0	0	1	1	0	HDAC inhibitor	HDAC1|HDAC2|HDAC3|HDAC6|HDAC10|HDAC8	-0.4918	0.9588	-1.4805
REP.A014_MCF10A_24H:P04	BRD-K41170226	BRD-K41170226	MCF10A	trt_cp	0.37 uM	24 h	3	108	0.0802	0.0941087	1	0	1	1	0	G protein-coupled receptor agonist|Biliverdin reductase A activator	GPBAR1|EFL1|FPR1	-0.4918	0.9588	-1.4805
REP.A015_HEK293_24H:K21	BRD-K59433843	ICI-192605	HEK293	trt_cp	1.11 uM	24 h	2	56	0.1765	0.10053	1	0	1	1	0	Thromboxane receptor antagonist	TBXA2R	-0.4918	0.9588	-1.4805
REP.B004_HT29_24H:H15	BRD-K22848513	BRD-K22848513	HT29	trt_cp	0.25 uM	24 h	2	243	0.4059	0.317573	0	0	1	1	0	Nuclear factor erythroid derived, like (NRF2) activator|Apoptosis stimulant|BCL inhibitor|Glutathione Reductase (NADPH) Activators|Heme Oxygenase Activators|IKK-1 (IKK-alpha) Inhibitors|NFKB inhibitor|Nitric oxide production inhibitor|PPAR receptor agonist|Reducing agent	NFE2L2|PPARG|BCL2|CHUK|GSR|HMOX1|HMOX2|STAT3	-0.4917	0.9588	-1.4802
POL001_JURKAT_24H:B23	BRD-K80738081	resveratrol	JURKAT	trt_cp	0.125 uM	24 h	3	114	0.21	0.156456	1	1	1	1	0	Cytochrome P450 inhibitor|SIRT activator	PTGS1|SIRT1|PTGS2|APOA1|BACE1|MAOA|SCN5A|TXNRD1|TXNRD2|XDH|CSNK2A1|NQO2	-0.4917	0.9588	-1.48
EMU001_MINO_24H:F11	BRD-A52530684	doxorubicin	MINO	trt_cp	0.04 uM	24 h	3	120	0.4077	0.223662	1	1	1	1	0	Topoisomerase inhibitor	TOP2A	-0.4917	0.9588	-1.48
CPC016_SKB_24H:BRD-K96809896-300-01-5:10	BRD-K96809896	SKF-86002	SKB	trt_cp	10 uM	24 h	3	132	0.18	0.155867	1	0	1	1	0	P38 MAPK inhibitor	ALOX5|MAPK14	-0.4916	0.9588	-1.4798
CPC004_A375_6H:BRD-K49519092-303-01-4:10	BRD-K49519092	immethridine	A375	trt_cp	10 uM	6 h	3	125	0.25	0.178754	1	1	1	1	0	Histamine receptor agonist	HRH3	-0.4916	0.9588	-1.4797
CPC002_HCC515_6H:BRD-K97399794-001-08-8:10	BRD-K97399794	quercetin	HCC515	trt_cp	10 uM	6 h	3	131	0.26	0.186618	1	1	1	1	0	Polar auxin transport inhibitor	PIK3CG|AKR1B1|CYP2C8|EGFR|GAA|MAOA|PTPN1|SCN5A|SIRT1|XDH|ATP5A1|ATP5B|ATP5C1|HCK|HIBCH|PIM1|STK17B|UGT3A1	-0.4916	0.9588	-1.4797
REP.B018_YAPC_24H:H06	BRD-K34328244	MF-101	YAPC	trt_cp	0.01 uM	24 h	2	82	0.2017	0.130044	1	1	1	1	0	Estrogen receptor agonist	ESR2|XDH|CYP19A1	-0.4916	0.9588	-1.4797
REP.B026_HA1E_24H:P13	BRD-K91740057	felbinac	HA1E	trt_cp	2.22 uM	24 h	2	94	0.2401	0.151911	1	1	1	1	0	Cyclooxygenase inhibitor	CTSL	-0.4915	0.9587	-1.4796
CPC018_PHH_24H:BRD-K96084870-001-01-9:10	BRD-K96084870	DMBI	PHH	trt_cp	10 uM	24 h	3	433	0.27	0.345745	0	0	1	1	0	PDGFR inhibitor|VEGFR inhibitor	PDGFRB	-0.4915	0.9587	-1.4795
CPC013_A549_6H:BRD-K25504083-001-03-1:10	BRD-K25504083	cytochalasin-d	A549	trt_cp	10 uM	6 h	2	204	0.49	0.319701	0	0	1	1	0	Tubulin inhibitor	ACTA1	-0.4915	0.9587	-1.4795
LJP006_LNCAP_24H:L13	BRD-A79768653	sirolimus	LNCAP	trt_cp	10 uM	24 h	2	177	0.5076	0.303094	1	1	1	1	0	MTOR inhibitor	MTOR|FKBP1A|CCR5|FGF2	-0.4914	0.9585	-1.4794
NMH002_NPC_24H:BRD-K46018455-001-23-5:10	BRD-K46018455	bezafibrate	NPC	trt_cp	10 uM	24 h	3	100	0.42	0.207231	1	0	1	1	0	PPAR receptor agonist	PPARA|PPARD|PPARG|HSD11B1|LPL	-0.4914	0.9581	-1.4793
CPC019_MCF7_24H:BRD-K98426715-001-01-9:10	BRD-K98426715	tubacin	MCF7	trt_cp	10 uM	24 h	5	301	0.31	0.308883	0	0	1	1	0	HDAC inhibitor	HDAC6	-0.4914	0.9555	-1.4791
CPC014_ASC_24H:BRD-K16478699-001-02-7:10	BRD-K16478699	PLX-4720	ASC	trt_cp	10 uM	24 h	3	299	0.27	0.287308	0	0	1	1	0	RAF inhibitor	BRAF|KDR	-0.4913	0.9546	-1.479
CPC012_NEU_24H:BRD-K02130563-001-06-4:10	BRD-K02130563	panobinostat	NEU	trt_cp	10 uM	24 h	3	354	0.62	0.473727	0	0	1	1	0	HDAC inhibitor	HDAC1|HDAC2|HDAC3|HDAC4|HDAC6|HDAC7|HDAC8|HDAC9	-0.4913	0.9544	-1.4789
CPC003_HA1E_24H:BRD-K01815685-001-07-2:10	BRD-K01815685	BRD-K01815685	HA1E	trt_cp	10 uM	24 h	3	63	0.28	0.134301	1	1	1	1	0	Aryl hydrocarbon receptor agonist|Indoleamine 2,3-dioxygenase inhibitor	AHR|IDO1	-0.4913	0.9544	-1.4789
CPC015_MCF7_24H:BRD-K21853356-001-03-6:10	BRD-K21853356	RG-14620	MCF7	trt_cp	10 uM	24 h	5	179	0.15	0.165692	1	0	1	1	0	EGFR inhibitor	EGFR	-0.4911	0.9457	-1.4783
REP.B018_MCF10A_24H:P18	BRD-K67277431	picotamide	MCF10A	trt_cp	0.01 uM	24 h	2	46	0.1619	0.0872636	1	1	1	1	0	Thromboxane receptor antagonist|Thromboxane synthase inhibitor	TBXA2R|TBXAS1	-0.4911	0.945	-1.4782
CPC018_HT29_6H:BRD-A36267905-003-12-7:10	BRD-A36267905	buphenine	HT29	trt_cp	10 uM	6 h	5	229	0.17	0.199514	1	0	1	1	0	Adrenergic receptor agonist	ADRB2	-0.491	0.9432	-1.4779
PBIOA014_HT29_24H:M02	BRD-K47983010	BX-795	HT29	trt_cp	3.33 uM	24 h	2	186	0.3579	0.260896	1	1	1	1	0	IKK inhibitor	PDPK1|IKBKE|TBK1|CDK2|CHEK1|GSK3B|KDR|PDK1	-0.491	0.9434	-1.4779
CPC005_HA1E_24H:BRD-A37776212-003-02-5:10	BRD-A37776212	ICI-204448	HA1E	trt_cp	10 uM	24 h	3	134	0.28	0.195867	1	0	1	1	0	Opioid receptor agonist	OPRK1	-0.4909	0.943	-1.4778
CPC018_A549_6H:BRD-K17561142-003-16-8:10	BRD-K17561142	amiodarone	A549	trt_cp	10 uM	6 h	3	233	0.51	0.348573	1	1	1	1	0	Potassium channel antagonist	KCNH2|CHRM3|CYP2C8|SCN5A|ADRB1|CACNA1H|CACNA2D2|KCNA7	-0.4909	0.9427	-1.4777
CPC004_HCC515_6H:BRD-K93461745-003-14-4:10	BRD-K93461745	buspirone	HCC515	trt_cp	10 uM	6 h	3	43	0.18	0.0889613	1	0	1	1	0	Serotonin receptor agonist	HTR1A|DRD2	-0.4908	0.9404	-1.4775
REP.A022_HELA_24H:O24	BRD-K82677201	almitrine	HELA	trt_cp	0.04 uM	24 h	3	182	0.3574	0.257895	1	1	1	1	0	Neurotransmitter agonist	ATP1A1	-0.4908	0.941	-1.4775
CPC014_A375_6H:L12	BRD-K77286328	reversine	A375	trt_cp	10 uM	6 h	2	114	0.3892	0.212995	1	1	1	1	0	Aurora kinase inhibitor	AURKB|ADORA3|AURKA|INCENP|MAP2K1	-0.4908	0.9374	-1.4774
REP.A018_MCF10A_24H:M19	BRD-K66876909	linezolid	MCF10A	trt_cp	10 uM	24 h	2	102	0.2084	0.147428	0	0	1	1	0	Bacterial 50S ribosomal subunit inhibitor	MAOA|MAOB	-0.4908	0.9378	-1.4774
CPC017_MCF7_6H:BRD-K64157027-003-01-9:10	BRD-K64157027	ZD-2079	MCF7	trt_cp	10 uM	6 h	4	140	0.32	0.214028	1	0	1	1	0	Adrenergic receptor agonist	ADRB3	-0.4908	0.9394	-1.4774
REP.A015_THP1_24H:K22	BRD-K59433843	ICI-192605	THP1	trt_cp	0.37 uM	24 h	2	98	0.1898	0.137909	0	0	1	1	0	Thromboxane receptor antagonist	TBXA2R	-0.4908	0.9293	-1.4773
PAC004_U2OS_6H:BRD-K09397065-001-01-6:10	BRD-K09397065	SR-57227A	U2OS	trt_cp	10 uM	6 h	2	35	0.15	0.0732673	0	0	1	1	0	Serotonin receptor agonist	HTR3A	-0.4908	0.9293	-1.4773
REP.A009_HT29_24H:P20	BRD-K35169477	taranabant	HT29	trt_cp	3.33 uM	24 h	3	244	0.4587	0.338291	0	0	1	1	0	Cannabinoid receptor antagonist	CNR1	-0.4907	0.9276	-1.4772
CPC005_A549_24H:BRD-K55430733-003-01-6:10	BRD-K55430733	WAY-629	A549	trt_cp	10 uM	24 h	3	93	0.07	0.081587	1	0	1	1	0	Serotonin receptor agonist	HTR2C	-0.4907	0.9278	-1.4772
PBIOA014_HT29_24H:G10	BRD-K35520305	dacarbazine	HT29	trt_cp	0.37 uM	24 h	2	88	0.242	0.147564	1	1	1	1	0	DNA alkylating agent	PGD|POLA2	-0.4907	0.9284	-1.4772
CPC003_HCC515_24H:BRD-K18909381-001-01-4:10	BRD-K18909381	CGS-12066B	HCC515	trt_cp	10 uM	24 h	3	115	0.22	0.160839	1	1	1	1	0	Serotonin receptor agonist	HTR1B	-0.4906	0.9264	-1.477
REP.B001_YAPC_24H:K17	BRD-A29289453	PCA-4248	YAPC	trt_cp	0.03 uM	24 h	2	198	0.2687	0.233237	0	0	1	1	0	Platelet activating factor receptor antagonist	PTAFR	-0.4906	0.9259	-1.4769
CPC018_MCF7_24H:BRD-K39670393-303-01-3:10	BRD-K39670393	amthamine	MCF7	trt_cp	10 uM	24 h	4	114	0.22	0.160138	1	0	1	1	0	Histamine receptor agonist	HRH2	-0.4906	0.9262	-1.4769
CRCGN015_HEPG2_48H:BRD-K09900591:10.9377	BRD-K09900591	caffeic-acid	HEPG2	trt_cp	10 uM	48 h	3	40	0.3	0.11077	0	0	1	1	0	HIV inhibitor|Lipoxygenase inhibitor|NFKB inhibitor|Nitric oxide production inhibitor|PPAR receptor agonist|TNF inhibitor	ALOX5|TNF|MIF	-0.4906	0.9249	-1.4767
LJP008_NPC.TAK_24H:G01	BRD-K13094524	PFI-1	NPC	trt_cp	10 uM	24 h	3	460	0.7207	0.58222	1	1	1	1	0	Bromodomain inhibitor	BRD4	-0.4905	0.9244	-1.4766
REP.A018_HELA_24H:H07	BRD-K63828191	raloxifene	HELA	trt_cp	10 uM	24 h	3	236	0.396	0.309125	0	0	1	1	0	Estrogen receptor antagonist|Selective estrogen receptor modulator (SERM)	ESR1|ESR2|ACVRL1|ENG	-0.4905	0.9239	-1.4765
REP.B008_A375_24H:A15	BRD-K35960502	niclosamide	A375	trt_cp	0.25 uM	24 h	2	68	0.2155	0.122408	1	1	1	1	0	DNA inhibitor|STAT inhibitor	STAT3	-0.4905	0.9238	-1.4764
CPC004_HT29_6H:BRD-A41995253-001-03-7:10	BRD-A41995253	brucine	HT29	trt_cp	10 uM	6 h	5	126	0.23	0.172139	0	0	1	1	0	Glycine receptor antagonist	CHRM1|CHRM2|CHRM3|CHRM4|CHRM5	-0.4905	0.9239	-1.4764
REP.A002_A375_24H:I24	BRD-A17462676	bambuterol	A375	trt_cp	0.04 uM	24 h	3	155	0.2862	0.212976	1	1	1	1	0	Adrenergic receptor agonist	ADRB2|CYP2D6|BCHE	-0.4904	0.9235	-1.4763
REP.B023_PC3_24H:J12	BRD-K70507123	doxofylline	PC3	trt_cp	0.01 uM	24 h	2	120	0.1695	0.144214	0	0	1	1	0	Adenosine receptor antagonist	ADORA1|PDE4A|PDE4B|PDE4C|PDE4D	-0.4904	0.9236	-1.4763
EMU001_THP1_6H:E13	BRD-A30984645	GDC-0834	THP1	trt_cp	10 uM	6 h	3	142	0.394	0.239179	0	0	1	1	0	BTK inhibitor	BTK	-0.4904	0.9236	-1.4763
REP.B020_HELA_24H:K17	BRD-K46018455	bezafibrate	HELA	trt_cp	0.03 uM	24 h	2	87	0.378	0.183373	1	1	1	1	0	PPAR receptor agonist	PPARA|PPARD|PPARG|HSD11B1|LPL	-0.4904	0.9233	-1.4762
REP.B028_HA1E_24H:N02	BRD-K96720755	relcovaptan	HA1E	trt_cp	0.74 uM	24 h	2	59	0.149	0.094809	1	1	1	1	0	Vasopressin receptor antagonist	AVPR1A|AVPR1B|AVPR2|OXTR	-0.4903	0.923	-1.476
REP.B010_A549_24H:M03	BRD-A14886633	norgestrel	A549	trt_cp	0.25 uM	24 h	2	109	0.4618	0.226867	1	1	1	1	0	Progesterone receptor agonist	PGR	-0.4902	0.9226	-1.4757
REP.A016_HT29_24H:K16	BRD-K55013654	lorcaserin	HT29	trt_cp	0.37 uM	24 h	3	143	0.1005	0.121222	1	0	1	1	0	Serotonin receptor agonist	HTR2C|HTR2A|HTR2B	-0.4901	0.9222	-1.4754
PCLB002_HCC515_24H:BRD-K81839095:10	BRD-K81839095	estrone	HCC515	trt_cp	10 uM	24 h	6	216	0.2	0.210171	0	0	1	1	0	Estrogen receptor agonist	ESR1|ESR2	-0.4901	0.9221	-1.4753
CPC017_A549_6H:BRD-K67013324-001-01-5:10	BRD-K67013324	luzindole	A549	trt_cp	10 uM	6 h	3	166	0.18	0.174792	1	0	1	1	0	Melatonin receptor antagonist	MTNR1B|MTNR1A	-0.4899	0.9151	-1.4747
REP.B010_HT29_24H:G22	BRD-K13356952	methazolamide	HT29	trt_cp	0.08 uM	24 h	2	93	0.1574	0.122342	1	1	1	1	0	Carbonic anhydrase inhibitor	CA1|CA2|CA4|CA7|INS|CA12|CA14	-0.4898	0.9146	-1.4745
REP.A024_THP1_24H:E15	BRD-K75037734	carbachol	THP1	trt_cp	1.11 uM	24 h	2	177	0.3038	0.234483	1	1	1	1	0	Cholinergic receptor agonist	CHRM1|CHRM2|CHRNA2|CHRM3|CHRM4|CHRM5	-0.4898	0.9146	-1.4744
CPC003_PC3_24H:BRD-K27450477-001-03-9:10	BRD-K27450477	EHNA	PC3	trt_cp	10 uM	24 h	5	234	0.23	0.234586	1	0	1	1	0	Adenosine deaminase inhibitor	ADA|PDE2A	-0.4897	0.9142	-1.4741
CPC003_HCC515_24H:BRD-K33453211-003-03-2:10	BRD-K33453211	levocabastine	HCC515	trt_cp	10 uM	24 h	3	120	0.28	0.185353	1	0	1	1	0	Histamine receptor antagonist	HRH1|NTSR2	-0.4897	0.9141	-1.474
REP.B026_HA1E_24H:B23	BRD-K87909389	alvocidib	HA1E	trt_cp	0.03 uM	24 h	2	161	0.3822	0.250835	1	1	1	1	0	CDK inhibitor	CDK2|CDK4|CDK1|CDK6|CDK7|CDK9|CDK5|CDK8|EGFR|PYGM|BCL2|BIRC5|CCNT1|MCL1|XIAP	-0.4895	0.9132	-1.4736
REP.B022_HELA_24H:K18	BRD-K73319509	PF-04217903	HELA	trt_cp	0.01 uM	24 h	2	94	0.3516	0.183831	1	1	1	1	0	MET inhibitor	MET	-0.4895	0.9135	-1.4736
REP.A022_HA1E_24H:P19	BRD-K82746043	navitoclax	HA1E	trt_cp	10 uM	24 h	2	146	0.3501	0.228614	1	1	1	1	0	BCL inhibitor	BCL2|BCL2L1|BCL2L2	-0.4895	0.9065	-1.4734
CPC003_VCAP_6H:BRD-K21565985-001-15-9:10	BRD-K21565985	xylazine	VCAP	trt_cp	10 uM	6 h	5	129	0.07	0.0960892	1	0	1	1	0	Adrenergic receptor agonist	ADRA2A|ADRA2B|ADRA2C	-0.4894	0.9054	-1.4733
REP.B021_A549_24H:F02	BRD-K82225283	BRD-K82225283	A549	trt_cp	0.74 uM	24 h	2	75	0.1099	0.0918037	1	0	1	1	0	Nitric oxide stimulant|Guanylate cyclase stimulant	GUCY1A2|GUCY1A3|GUCY1B3|GUCY1B2	-0.4894	0.9044	-1.4732
LJP009_NPC_24H:I07	BRD-K47983010	BX-795	NPC	trt_cp	10 uM	24 h	3	220	0.4749	0.326846	1	1	1	1	0	IKK inhibitor	PDPK1|IKBKE|TBK1|CDK2|CHEK1|GSK3B|KDR|PDK1	-0.4894	0.9036	-1.4731
LCP001_MCF10A.WT_6H:M23	BRD-K19761926	eplerenone	MCF10A	trt_cp	3.33 uM	6 h	2	52	0.2186	0.10781	1	0	1	1	0	Cytochrome P450 inhibitor	NR3C2|CYP3A5	-0.4893	0.9031	-1.4729
REP.B023_HELA_24H:B15	BRD-K67102207	phenylbutyrate	HELA	trt_cp	0.25 uM	24 h	2	95	0.3371	0.180955	0	0	1	1	0	HDAC inhibitor	CYP3A5|HDAC1	-0.4892	0.9024	-1.4726
CPC020_VCAP_6H:BRD-A07440155-003-22-1:10	BRD-A07440155	labetalol	VCAP	trt_cp	10 uM	6 h	5	155	0.27	0.206861	1	0	1	1	0	Adrenergic receptor antagonist	ADRB1|ADRB2|ADRA1A|ADRA1D|ADRA1B	-0.4891	0.9021	-1.4724
REP.A015_HELA_24H:F20	BRD-K57169635	dacomitinib	HELA	trt_cp	3.33 uM	24 h	3	141	0.3466	0.22354	1	1	1	1	0	EGFR inhibitor	EGFR|ERBB2|ERBB4	-0.4891	0.8981	-1.4722
CPC006_NOMO1_6H:BRD-K48923948-001-01-5:11.1	BRD-K48923948	BMS-641988	NOMO1	trt_cp	12 uM	6 h	2	229	0.09	0.145168	1	0	1	1	0	Androgen receptor antagonist	AR	-0.489	0.8981	-1.4721
CPC006_H1299_6H:BRD-K68185022-001-06-4:70.07	BRD-K68185022	ursolic-acid	H1299	trt_cp	70 uM	6 h	2	42	0.4	0.131065	0	0	1	1	0	11-beta-HSD1 inhibitor|Acetylcholinesterase inhibitor|ATPase inhibitor|Caspase inhibitor|HIV protease inhibitor|Lipid peroxidase inhibitor|NFKB inhibitor|Quorum sensing signaling modulator|STAT inhibitor|Steryl sulfatase inhibitor|Tyrosine phosphatase inhibitor	HSD11B1|PTPN1|ACHE|CASP3|STS|PLA2G1B|PYGM	-0.489	0.8981	-1.4721
CPC017_NPC_24H:BRD-A71262238-001-04-3:10	BRD-A71262238	nafadotride	NPC	trt_cp	10 uM	24 h	4	160	0.08	0.114403	0	0	1	1	0	Dopamine receptor antagonist	DRD3|DRD2|HTR1A	-0.489	0.8981	-1.472
PBIOA017_MCF7_24H:O13	BRD-K64610608	EMF-BCA1-57	MCF7	trt_cp	10 uM	24 h	3	107	0.21	0.151577	1	1	1	1	0	Caspase inhibitor	CASP3	-0.489	0.8981	-1.4719
PBIOA015_A375_24H:J07	BRD-K71879491	tretinoin	A375	trt_cp	10 uM	24 h	3	202	0.22	0.213166	1	1	1	1	0	Retinoid receptor agonist|Retinoid receptor ligand	RARG|RORB|RARA|RARB|ALDH1A1|ALDH1A2|GPRC5A|NR0B1|NR2C2|PPARD|RARRES1|RORC|RXRB|RXRG	-0.489	0.8981	-1.4719
CPC011_MCF7_24H:BRD-K74195153-050-10-5:10	BRD-K74195153	irsogladine	MCF7	trt_cp	10 uM	24 h	2	112	0.51	0.241671	0	0	1	1	0	Phosphodiesterase inhibitor	PDE4A	-0.4889	0.8981	-1.4717
CPC004_HT29_6H:BRD-K39120595-304-03-9:10	BRD-K39120595	bithionol	HT29	trt_cp	10 uM	6 h	5	352	0.38	0.369823	0	0	1	1	0	Autotaxin inhibitor	ESR1|ESR2|MCL1	-0.4889	0.8981	-1.4716
CPC018_MCF7_6H:BRD-A39255369-001-01-5:10	BRD-A39255369	DCPIB	MCF7	trt_cp	10 uM	6 h	3	140	0.31	0.210657	1	0	1	1	0	Chloride channel blocker|Gap junction modulator|Glutamate inhibitor	SLC1A2	-0.4887	0.8981	-1.4712
NMH002_NEU_6H:BRD-K87714311-001-01-9:10	BRD-K87714311	zebularine	NEU	trt_cp	10 uM	6 h	3	72	0.12	0.0939913	0	0	1	1	0	DNA inhibitor	CDA|DNMT1	-0.4887	0.8981	-1.471
CPC002_HCC515_6H:BRD-K92000912-001-06-8:10	BRD-K92000912	AM-251	HCC515	trt_cp	10 uM	6 h	3	65	0.17	0.106295	1	0	1	1	0	Cannabinoid receptor antagonist	CNR1|GPR18|GPR55	-0.4885	0.8976	-1.4705
CPD003_MCF7_6H:BRD-K63874012-103-02-3:10	BRD-K63874012	thioperamide	MCF7	trt_cp	10 uM	6 h	2	109	0.28	0.176654	0	0	1	1	0	Histamine receptor antagonist	HRH3|HRH4	-0.4884	0.8958	-1.4702
LJP009_SKL.C_24H:H01	BRD-K53281329	BAY-61-3606	SKL	trt_cp	10 uM	24 h	3	453	0.7173	0.576408	1	1	1	1	0	Syk inhibitor	SYK	-0.4883	0.8953	-1.4699
REP.A009_HA1E_24H:E19	BRD-K29950728	clomifene	HA1E	trt_cp	10 uM	24 h	3	282	0.5497	0.398124	0	0	1	1	0	Estrogen receptor antagonist	ESR1|AR	-0.4883	0.8953	-1.4699
CPC005_HA1E_24H:BRD-K38251852-001-06-6:10	BRD-K38251852	paxilline	HA1E	trt_cp	10 uM	24 h	3	114	0.25	0.170708	1	1	1	1	0	Potassium channel antagonist	KCNMA1	-0.4882	0.895	-1.4695
REP.A027_A375_24H:P07	BRD-K97963946	EMD-1214063	A375	trt_cp	10 uM	24 h	3	328	0.4339	0.381472	0	0	1	1	0	HGF receptor inhibitor	MET	-0.4882	0.895	-1.4695
CPC002_HA1E_24H:BRD-K60640630-001-03-7:10	BRD-K60640630	mometasone	HA1E	trt_cp	10 uM	24 h	3	127	0.38	0.222139	1	1	1	1	0	Glucocorticoid receptor agonist|Immunosuppressant	NR3C1	-0.4881	0.8949	-1.4694
REP.B013_THP1_24H:C01	BRD-A37780065	triamcinolone	THP1	trt_cp	2.22 uM	24 h	2	237	0.3546	0.293139	1	1	1	1	0	Glucocorticoid receptor agonist	NR3C1|SERPINA6	-0.4881	0.8949	-1.4694
REP.B013_MCF10A_24H:C02	BRD-A37780065	triamcinolone	MCF10A	trt_cp	0.74 uM	24 h	2	78	0.1152	0.0958526	1	1	1	1	0	Glucocorticoid receptor agonist	NR3C1|SERPINA6	-0.4879	0.8936	-1.4688
CPC017_PHH_24H:BRD-A17453586-003-01-5:10	BRD-A17453586	MDL-72832	PHH	trt_cp	10 uM	24 h	3	192	0.21	0.203044	0	0	1	1	0	Serotonin receptor agonist	HTR1A	-0.4879	0.8932	-1.4687
REP.A023_MDAMB231_24H:M10	BRD-K71822263	D-serine	MDAMB231	trt_cp	0.37 uM	24 h	2	61	0.3548	0.14876	1	1	1	1	0	Glutamate receptor agonist	GRIN1|GLRA1|GRIN2A|GRIN2B|GRIN2C|GRIN2D|SERPINB3	-0.4879	0.8932	-1.4686
CPC015_A549_24H:BRD-A67799922-003-15-3:10	BRD-A67799922	phenoxybenzamine	A549	trt_cp	10 uM	24 h	3	168	0.45	0.27803	0	0	1	1	0	Adrenergic receptor antagonist	ADRA2B|ADRA1A|ADRA1B|ADRA1D|ADRA2A|ADRA2C|ADRB2|CALM1	-0.4878	0.8932	-1.4684
NMH002_FIBRNPC_24H:BRD-K35483542-001-05-6:10	BRD-K35483542	alitretinoin	NPC	trt_cp	10 uM	24 h	3	160	0.41	0.25899	1	1	1	1	0	Retinoid receptor agonist	RARG|RARA|RARB|RXRA|RXRG|RXRB	-0.4878	0.8932	-1.4683
REP.A015_MCF10A_24H:M18	BRD-A51078674	diclofensine	MCF10A	trt_cp	0.04 uM	24 h	3	45	0.1642	0.0869207	1	0	1	1	0	Dopamine receptor antagonist	SLC6A3|DRD1|MAOA|MAOB	-0.4877	0.8932	-1.4681
LJP006_A375_24H:E16	BRD-K51313569	palbociclib	A375	trt_cp	0.37 uM	24 h	2	139	0.6297	0.299161	1	1	1	1	0	CDK inhibitor	CDK4|CDK6|CCND3	-0.4877	0.8932	-1.468
PAC004_U2OS_6H:BRD-K07507905-236-01-8:10	BRD-K07507905	BRL-37344	U2OS	trt_cp	10 uM	6 h	2	53	0.22	0.109189	1	1	1	1	0	Adrenergic receptor agonist	ADRB3|ADRB1|ADRB2	-0.4877	0.8932	-1.468
REP.A026_A549_24H:I01	BRD-K90948141	indiplon	A549	trt_cp	10 uM	24 h	2	120	0.1501	0.13571	0	0	1	1	0	Benzodiazepine receptor agonist|GABA receptor agonist	GABRA1|GABRA2|GABRA3|GABRA5	-0.4876	0.8932	-1.4677
REP.A028_HEK293_24H:A08	BRD-K92428153	mycophenolate-mofetil	HEK293	trt_cp	3.33 uM	24 h	2	289	0.4878	0.379665	0	0	1	1	0	Inosine monophosphate dehydrogenase inhibitor|Dehydrogenase inhibitor|Hydroxycarboxylic acid receptor agonist|Immunosuppressant|Inositol monophosphatase inhibitor	IMPDH1|IMPDH2|HCAR2	-0.4876	0.8932	-1.4677
REP.A026_MCF10A_24H:J20	BRD-K91315211	betahistine	MCF10A	trt_cp	3.33 uM	24 h	3	92	0.1541	0.1204	0	0	1	1	0	Histamine receptor agonist|Histamine receptor antagonist	HRH3|HRH1	-0.4875	0.8932	-1.4676
PCL001_A549_24H:BRD-K57090026:0.37	BRD-K57090026	I-CBP112	A549	trt_cp	0.37 uM	24 h	3	139	0.12	0.130596	1	0	1	1	0	Bromodomain inhibitor	CREBBP|EP300	-0.4875	0.8932	-1.4675
CPC019_HT29_6H:BRD-K98426715-001-01-9:10	BRD-K98426715	tubacin	HT29	trt_cp	10 uM	6 h	5	459	0.24	0.335616	1	0	1	1	0	HDAC inhibitor	HDAC6	-0.4875	0.8932	-1.4675
CPD003_PC3_24H:BRD-K48099440-001-01-7:10	BRD-K48099440	BRD-K48099440	PC3	trt_cp	10 uM	24 h	2	80	0.16	0.114403	1	0	1	1	0	Prostanoid receptor antagonist	PTGER1|PTGER2	-0.4874	0.8932	-1.4672
AICHI001_SKMEL5_24H:D08	BRD-K63923597	barasertib-HQPA	SKMEL5	trt_cp	2.5 uM	24 h	3	125	0.36	0.214505	1	1	1	1	0	Aurora kinase inhibitor	AURKB|AURKC|AURKA	-0.4874	0.8932	-1.4671
PBIOA020_HT29_24H:N13	BRD-K48188942	ML-281	HT29	trt_cp	10 uM	24 h	3	188	0.27	0.22782	1	1	1	1	0	Serine/threonine kinase inhibitor	STK33	-0.4873	0.8932	-1.467
CPC017_NPC_24H:BRD-K17896185-001-01-2:10	BRD-K17896185	FIT	NPC	trt_cp	10 uM	24 h	4	128	0.22	0.169686	1	0	1	1	0	Opioid receptor agonist	OPRD1	-0.4873	0.8932	-1.4669
REP.A028_HT29_24H:J12	BRD-K95237249	probenecid	HT29	trt_cp	0.04 uM	24 h	2	222	0.2772	0.250844	0	0	1	1	0	Uricosuric	SLC22A6|SLC22A11|SLC22A8|ABCC1|TRPV2|PANX1|SLCO1C1	-0.4873	0.8932	-1.4669
LJP009_SHSY5Y_24H:P01	BRD-K68407802	KIN001-055	SHSY5Y	trt_cp	10 uM	24 h	3	305	0.5119	0.399552	0	0	1	1	0	EGFR inhibitor|JAK inhibitor|Leukotriene inhibitor|Mediator release inhibitor	JAK3	-0.4872	0.8932	-1.4666
ASG003_U2OS_24H:D07	BRD-K02113016	olaparib	U2OS	trt_cp	10 uM	24 h	5	138	0.352	0.222865	1	1	1	1	0	PARP inhibitor	PARP1|PARP2|PARP3	-0.4872	0.8932	-1.4666
CPC015_HEPG2_6H:BRD-A08187463-001-03-8:10	BRD-A08187463	racecadotril	HEPG2	trt_cp	10 uM	6 h	2	108	0.15	0.128703	0	0	1	1	0	Enkephalinase inhibitor	MME	-0.4872	0.8932	-1.4665
ASG002_MCF7_24H:O07	BRD-K27316855	calcitriol	MCF7	trt_cp	10 uM	24 h	3	139	0.3234	0.214392	1	1	1	1	0	Vitamin D receptor agonist	VDR|CYP3A5	-0.487	0.8932	-1.4661
CPC018_HT29_6H:BRD-K80431395-001-02-4:10	BRD-K80431395	triciribine	HT29	trt_cp	10 uM	6 h	5	435	0.45	0.447385	1	1	1	1	0	AKT inhibitor	AKT1|AKT2|AKT3	-0.4869	0.8929	-1.4658
REP.B023_HT29_24H:F19	BRD-K69122748	diacerein	HT29	trt_cp	2.22 uM	24 h	2	129	0.2029	0.163594	1	1	1	1	0	Interleukin inhibitor	IL1B	-0.4869	0.8923	-1.4657
REP.B018_HELA_24H:P22	BRD-A67516570	lafutidine	HELA	trt_cp	0.08 uM	24 h	2	59	0.1669	0.100342	1	1	1	1	0	Histamine receptor antagonist	HRH2	-0.4869	0.8924	-1.4657
PBIOA019_PC3_24H:E07	BRD-K96354014	nifedipine	PC3	trt_cp	10 uM	24 h	3	148	0.31	0.216592	1	1	1	1	0	Calcium channel blocker	CACNA1C|CACNA1D|CACNA1S|CACNA1F|CACNA2D1|CYP3A5|CACNA1H|CACNB2|CALM1|GLRA1|GLRA3|GLRB|KCNA1|KCNA5|NR1I2|TRPM3	-0.4869	0.8921	-1.4656
ASG003_U2OS_6H:J16	BRD-K22134346	simvastatin	U2OS	trt_cp	10 uM	6 h	5	73	0.2943	0.148213	0	0	1	1	0	HMGCR inhibitor	HMGCR|CYP2C8|CYP3A4|CYP3A5|ITGB2	-0.4869	0.8921	-1.4656
REP.A011_HEK293_24H:G24	BRD-K05977355	fluconazole	HEK293	trt_cp	0.04 uM	24 h	2	100	0.2174	0.149094	0	0	1	1	0	Sterol demethylase inhibitor	CYP3A5|CYP3A7|CYP51A1	-0.4869	0.8921	-1.4656
REP.B001_HA1E_24H:K04	BRD-K28971625	ZD-7114	HA1E	trt_cp	0.08 uM	24 h	3	75	0.1257	0.0981813	1	1	1	1	0	Adrenergic receptor agonist	ADRB3	-0.4867	0.8921	-1.4652
REP.B010_HELA_24H:H02	BRD-K13154216	everolimus	HELA	trt_cp	0.74 uM	24 h	2	161	0.3568	0.242357	1	1	1	1	0	MTOR inhibitor	MTOR|CYP3A5|FKBP1A	-0.4867	0.8921	-1.4652
REP.A021_YAPC_24H:I19	BRD-K84091759	candesartan	YAPC	trt_cp	10 uM	24 h	3	171	0.3137	0.234199	1	1	1	1	0	Angiotensin receptor antagonist	AGTR1	-0.4868	0.8921	-1.4652
REP.B008_THP1_24H:O24	BRD-K89704198	vincamine	THP1	trt_cp	0.01 uM	24 h	2	63	0.2699	0.131857	1	1	1	1	0	Adrenergic receptor antagonist	CHRM1|CHRM2|CHRM3|CHRM4	-0.4867	0.8921	-1.465
REP.B011_HUVEC.A_24H:C14	BRD-K04804440	ciprofloxacin	HUVEC	trt_cp	0.74 uM	24 h	2	60	0.0641	0.0627098	0	0	1	1	0	Bacterial DNA Gyrase inhibitor	TOP2A	-0.4867	0.8921	-1.465
CPC014_HA1E_6H:BRD-K84085265-001-01-3:10	BRD-K84085265	CG-930	HA1E	trt_cp	10 uM	6 h	3	60	0.03	0.0429009	1	0	1	1	0	JNK inhibitor	MAPK8	-0.4866	0.8921	-1.4649
CPC016_A549_24H:BRD-K95851186-001-02-9:10	BRD-K95851186	CGP-13501	A549	trt_cp	10 uM	24 h	2	44	0.1	0.0670744	0	0	1	1	0	GABA receptor antagonist	GABBR1	-0.4866	0.8921	-1.4647
MUC.CP008_P1A82_24H:A08	BRD-K53972329	ruxolitinib	P1A82	trt_cp	3.33 uM	24 h	3	144	0.35	0.22701	1	1	1	1	0	JAK inhibitor	JAK1|JAK2|TYK2|JAK3	-0.4865	0.8921	-1.4646
REP.A024_MCF10A_24H:D05	BRD-K74141488	naftifine	MCF10A	trt_cp	0.125 uM	24 h	3	141	0.3125	0.212259	1	1	1	1	0	Fungal squalene epoxidase inhibitor	SQLE	-0.4866	0.8921	-1.4646
REP.B022_HA1E_24H:L10	BRD-A73368467	fexofenadine	HA1E	trt_cp	0.08 uM	24 h	2	78	0.1703	0.116543	1	1	1	1	0	Histamine receptor antagonist	HRH1	-0.4865	0.8921	-1.4644
CPC017_A549_6H:BRD-K37080523-001-02-8:10	BRD-K37080523	isoreserpine	A549	trt_cp	10 uM	6 h	3	91	0.31	0.169837	1	1	1	1	0	Vesicular monoamine transporter inhibitor	SLC18A2|SLC18A1	-0.4864	0.8921	-1.4642
REP.A026_HA1E_24H:J19	BRD-K91315211	betahistine	HA1E	trt_cp	10 uM	24 h	2	157	0.2333	0.193525	0	0	1	1	0	Histamine receptor agonist|Histamine receptor antagonist	HRH3|HRH1	-0.4864	0.8921	-1.4642
REP.A004_HELA_3H:G21	BRD-A02006392	nitrendipine	HELA	trt_cp	1.11 uM	3 h	3	128	0.3262	0.206622	1	1	1	1	0	Calcium channel blocker	CACNA1C|CACNA1D|CACNA2D1|CACNA1H|CACNA1S|CACNA2D2|CACNB2|CACNG1|KCNN4	-0.4863	0.8921	-1.4638
LJP007_HEK293_24H:F13	BRD-K28392481	AZD-4547	HEK293	trt_cp	10 uM	24 h	2	113	0.4674	0.232388	1	1	1	1	0	FGFR inhibitor	FGF2|FGFR1|FGFR2|FGFR3|FGFR4|IGF1R|KDR	-0.4863	0.8921	-1.4638
PBIOA014_HA1E_24H:H01	BRD-K52836380	AZD-7545	HA1E	trt_cp	12 uM	24 h	3	126	0.3	0.196597	1	1	1	1	0	Pyruvate dehydrogenase kinase inhibitor	PDK2|PDK1	-0.4862	0.8921	-1.4636
CPC006_A549_6H:BRD-K73261812-001-01-1:10	BRD-K73261812	BRD-K73261812	A549	trt_cp	10 uM	6 h	4	220	0.43	0.311011	1	1	1	1	0	Beta catenin inhibitor	CTNNB1	-0.4861	0.8921	-1.4633
MOAR004_PC3_24H:H10	BRD-K14658796	drotaverine	PC3	trt_cp	10 uM	24 h	3	329	0.6	0.449267	1	1	1	1	0	Phosphodiesterase inhibitor	CACNA1C|PDE4A	-0.4861	0.8921	-1.4633
MOAR003_A375_24H:N24	BRD-K33226500	indinavir	A375	trt_cp	1.11 uM	24 h	3	104	0.23	0.156391	1	1	1	1	0	HIV inhibitor	CYP3A5|CYP3A4|CYP3A7	-0.4861	0.8921	-1.4631
CPD002_PC3_24H:BRD-A95602221-003-01-3:10	BRD-A95602221	celiprolol	PC3	trt_cp	10 uM	24 h	3	92	0.17	0.126459	1	0	1	1	0	Adrenergic receptor antagonist	ADRB1|ADRB2|ADRA2A	-0.4859	0.8921	-1.4626
CPC017_SKB_24H:BRD-K23383398-001-01-6:10	BRD-K23383398	T-0901317	SKB	trt_cp	10 uM	24 h	2	143	0.03	0.0662307	0	0	1	1	0	LXR agonist|ABC transporter expression enhancer|ROR inverse agonist	NR1H3|NR1H2|ABCA1|RORA|RORC|NCOA1|NCOA2|NR1I2|RXRB	-0.4859	0.8921	-1.4626
CPC018_SKB_24H:BRD-K52989797-001-01-1:10	BRD-K52989797	clomipramine	SKB	trt_cp	10 uM	24 h	3	75	0.34	0.161473	1	1	1	1	0	Serotonin receptor antagonist	SLC6A4|SLC6A2|CYP2C19|GSTP1|HTR2A|HTR2B|HTR2C|SLC6A3	-0.4859	0.8921	-1.4626
CPC020_A375_6H:BRD-A79803969-003-13-8:10	BRD-A79803969	memantine	A375	trt_cp	10 uM	6 h	5	145	0.12	0.133384	1	0	1	1	0	Glutamate receptor antagonist	GRIN1|CYP2E1|CHRFAM7A|DRD2|GRIN2A|GRIN2B|GRIN3A|HTR3A	-0.4858	0.8921	-1.4624
REP.A021_MCF7_24H:H20	BRD-K83057217	doxifluridine	MCF7	trt_cp	3.33 uM	24 h	2	90	0.0718	0.0812857	1	0	1	1	0	Thymidylate synthase inhibitor	TYMS	-0.4857	0.8921	-1.4621
REP.B018_PC3_24H:F19	BRD-K63504947	semaxanib	PC3	trt_cp	2.22 uM	24 h	2	112	0.2729	0.176783	1	1	1	1	0	VEGFR inhibitor	KDR|FLT1|KIT|PDGFRB|FLT3|MET|FGFR1|PDGFRA|RET	-0.4857	0.8921	-1.4621
LJP005_MCF10A_3H:I15	BRD-K08799216	pelitinib	MCF10A	trt_cp	1.11 uM	3 h	2	180	0.4568	0.289955	1	1	1	1	0	EGFR inhibitor	EGFR|ERBB2	-0.4856	0.8921	-1.4619
CPC011_A549_6H:BRD-K43236057-001-04-8:10	BRD-K43236057	polydatin	A549	trt_cp	10 uM	6 h	3	254	0.4	0.322313	1	0	1	1	0	ICAM1 inhibitor	XDH|ICAM1	-0.4857	0.8921	-1.4619
CPC014_PHH_24H:BRD-A74904029-001-05-7:10	BRD-A74904029	EI-231	PHH	trt_cp	10 uM	24 h	4	296	0.3	0.301326	0	0	1	1	0	Casein kinase inhibitor	CSNK2A1	-0.4857	0.8921	-1.4619
CPC006_U937_6H:BRD-K00317371-001-02-0:10	BRD-K00317371	RITA	U937	trt_cp	10 uM	6 h	2	301	0.59	0.426128	1	1	1	1	0	MDM inhibitor	MDM2|TXNRD1|TXNRD2	-0.4856	0.8921	-1.4617
PBIOA019_PC3_24H:L06	BRD-K93442924	voapaxar	PC3	trt_cp	0.04 uM	24 h	2	101	0.32	0.181788	1	1	1	1	0	Thrombin inhibitor	F2R	-0.4856	0.8921	-1.4617
REP.B020_MCF10A_24H:O11	BRD-K48892307	sasapyrine	MCF10A	trt_cp	0.03 uM	24 h	2	154	0.248	0.197614	0	0	1	1	0	NFKB inhibitor	PTGS1|PTGS2	-0.4854	0.8921	-1.4612
REP.B026_HELA_24H:N03	BRD-A98845662	desvenlafaxine	HELA	trt_cp	0.25 uM	24 h	2	72	0.176	0.113829	1	0	1	1	0	Serotonin receptor antagonist	SLC6A4|SLC6A2|SLC6A3	-0.4854	0.8921	-1.4611
CPC005_PC3_24H:BRD-A34299591-001-03-4:10	BRD-A34299591	budesonide	PC3	trt_cp	10 uM	24 h	5	247	0.37	0.305689	1	1	1	1	0	Glucocorticoid receptor agonist	NR3C1|CYP3A5|CYP3A7	-0.4854	0.8921	-1.461
REP.B026_YAPC_24H:L04	BRD-A91699651	chloroquine	YAPC	trt_cp	0.08 uM	24 h	2	96	0.2959	0.170427	1	1	1	1	0	Antimalarial	CYP2C8|GSTA2|MRGPRX1|TLR9|TNF	-0.4853	0.8921	-1.4608
REP.B019_MCF10A_24H:B11	BRD-A44863528	proglumide	MCF10A	trt_cp	0.03 uM	24 h	2	61	0.2663	0.128879	1	1	1	1	0	CCK receptor antagonist	CCKBR|CCKAR	-0.4853	0.8921	-1.4608
CPD002_MCF7_6H:BRD-A42167015-003-07-8:10	BRD-A42167015	carteolol	MCF7	trt_cp	10 uM	6 h	3	166	0.3	0.225655	0	0	1	1	0	Adrenergic receptor antagonist	ADRB1|ADRB2	-0.4851	0.8921	-1.4604
LJP008_CD34_24H:H05	BRD-K21906513	UNC-669	CD34	trt_cp	0.12 uM	24 h	3	76	0.2149	0.129228	1	0	1	1	0	L3MBTL antagonist	L3MBTL1|L3MBTL3	-0.4852	0.8921	-1.4604
CPC006_HT29_24H:BRD-K00317371-001-02-0:10	BRD-K00317371	RITA	HT29	trt_cp	10 uM	24 h	4	250	0.52	0.364588	1	1	1	1	0	MDM inhibitor	MDM2|TXNRD1|TXNRD2	-0.4851	0.8921	-1.4603
CPC002_VCAP_24H:BRD-K18816859-001-01-4:10	BRD-K18816859	L-694247	VCAP	trt_cp	10 uM	24 h	3	192	0.5	0.313304	1	1	1	1	0	Serotonin receptor agonist	HTR1D|HTR1A|HTR1B	-0.4851	0.8921	-1.4603
REP.A015_MDAMB231_24H:F13	BRD-K57041787	dabigatran-etexilate	MDAMB231	trt_cp	10 uM	24 h	2	78	0.4096	0.180741	1	1	1	1	0	Thrombin inhibitor|Serine protease inhibitor	F2	-0.4849	0.8915	-1.4598
REP.A019_A549_24H:L13	BRD-K49328571	dasatinib	A549	trt_cp	10 uM	24 h	2	332	0.2885	0.312948	0	0	1	1	0	KIT inhibitor|Bcr-Abl inhibitor|Ephrin inhibitor|PDGFR inhibitor|Src inhibitor|Tyrosine kinase inhibitor	ABL1|FYN|LCK|SRC|KIT|YES1|EPHA2|LYN|PDGFRB|BCR|BTK|DDR1|DDR2|PDGFRA|ABL2|BLK|FGR|FRK|HCK|SRMS|STAT5B	-0.4849	0.8916	-1.4598
CPC014_VCAP_24H:BRD-K24994810-001-01-9:10	BRD-K24994810	androstenol	VCAP	trt_cp	10 uM	24 h	5	150	0.31	0.21805	0	0	1	1	0	GABA receptor antagonist	NR1I3	-0.4849	0.8912	-1.4597
CPC002_HA1E_24H:BRD-K10042277-001-04-3:10	BRD-K10042277	desmethylclozapine	HA1E	trt_cp	10 uM	24 h	3	105	0.28	0.173382	1	1	1	1	0	Acetylcholine receptor agonist	CHRM1|DRD2|DRD3|HTR2A|HTR2C	-0.4849	0.8903	-1.4595
MOAR001_PC3_24H:N04	BRD-K34776109	glimepiride	PC3	trt_cp	10 uM	24 h	3	258	0.46	0.348353	1	1	1	1	0	Insulin secretagogue	ABCC8|KCNJ11|KCNJ1	-0.4848	0.89	-1.4594
CPC014_PC3_6H:BRD-K04923131-001-06-3:10	BRD-K04923131	BRD-K04923131	PC3	trt_cp	10 uM	6 h	4	234	0.53	0.356104	1	1	1	1	0	GSK inhibitor|Lipoxygenase inhibitor	GSK3B|ALOX5|GSK3A	-0.4847	0.8876	-1.4591
POL001_JURKAT_24H:L23	BRD-K94649603	taxifolin	JURKAT	trt_cp	0.125 uM	24 h	3	62	0.32	0.14243	1	0	1	1	0	Opioid receptor antagonist	APOB|APP|HMGCR|ADIPOR2	-0.4846	0.8874	-1.4588
LJP002_SKBR3_24H:BRD-K53281329-001-01-9:10	BRD-K53281329	BAY-61-3606	SKBR3	trt_cp	10 uM	24 h	3	230	0.44	0.321678	0	0	1	1	0	Syk inhibitor	SYK	-0.4846	0.8874	-1.4588
CPC004_VCAP_24H:K03	BRD-A72703248	SKF-96365	VCAP	trt_cp	10 uM	24 h	6	169	0.24	0.203648	0	0	1	1	0	Calcium channel blocker	CYP3A4|TRPC1|PKD2|TRPC3|TRPC4|TRPC5|TRPV2	-0.4846	0.8874	-1.4588
REP.B005_MCF7_24H:H18	BRD-K09397065	SR-57227A	MCF7	trt_cp	0.01 uM	24 h	2	117	0.2007	0.154952	0	0	1	1	0	Serotonin receptor agonist	HTR3A	-0.4846	0.8874	-1.4587
CPC016_MCF7_24H:BRD-K87510569-001-01-0:10	BRD-K87510569	RS-504393	MCF7	trt_cp	10 uM	24 h	4	182	0.27	0.224155	1	1	1	1	0	CC chemokine receptor antagonist	CCR2|CCL2	-0.4846	0.8874	-1.4587
CPC015_MCF7_24H:BRD-K40887525-001-14-4:10	BRD-K40887525	ritanserin	MCF7	trt_cp	10 uM	24 h	5	117	0.2	0.154682	1	0	1	1	0	Serotonin receptor antagonist	HTR2A|HTR2C|HTR2B|ADRA1A|ADRA1B|ADRA1D|HTR1A|HTR1B|HTR1D|HTR5A|HTR6|HTR7	-0.4846	0.8874	-1.4586
CPC016_NEU_24H:BRD-K08547377-003-03-2:10	BRD-K08547377	irinotecan	NEU	trt_cp	10 uM	24 h	3	180	0.09	0.128703	0	0	1	1	0	Topoisomerase inhibitor	TOP1|CYP3A5|TOP1MT	-0.4845	0.8874	-1.4585
CPC002_HCC515_6H:BRD-K18816859-001-01-4:10	BRD-K18816859	L-694247	HCC515	trt_cp	10 uM	6 h	3	49	0.11	0.0742378	1	0	1	1	0	Serotonin receptor agonist	HTR1D|HTR1A|HTR1B	-0.4845	0.8874	-1.4584
REP.B005_HELA_3H:E20	BRD-K09078998	deforolimus	HELA	trt_cp	0.74 uM	3 h	3	233	0.4673	0.333662	1	1	1	1	0	MTOR inhibitor	MTOR	-0.4844	0.8874	-1.4583
REP.A014_PC3_24H:H23	BRD-K60585088	paricalcitol	PC3	trt_cp	0.125 uM	24 h	3	271	0.4433	0.350481	1	1	1	1	0	Vitamin D receptor agonist	VDR|PTH	-0.4844	0.8874	-1.4581
REP.A006_A375_24H:B07	BRD-A18917088	estradiol	A375	trt_cp	10 uM	24 h	3	226	0.3627	0.289507	1	1	1	1	0	Estrogen receptor agonist	ESR1|ESR2|NR1I2|CYP2B6|CYP2C19|CYP2C8|CYP2E1|CYP3A5|CYP3A7|GPER1|KCNMA1	-0.4844	0.8874	-1.4581
REP.A007_HELA_24H:H01	BRD-K51333959	siramesine	HELA	trt_cp	10 uM	24 h	3	207	0.4667	0.314293	1	1	1	1	0	Sigma receptor antagonist	PGRMC1|SIGMAR1|ADRA1A|ADRA1B|ADRA1D	-0.4843	0.8874	-1.4579
CPC006_MCF7_24H:F08	BRD-A36318220	necrostatin-1	MCF7	trt_cp	150 uM	24 h	5	124	0.3333	0.20557	1	1	1	1	0	RIPK inhibitor	IDO1|KRR1|RIPK1	-0.4842	0.8874	-1.4576
REP.A022_HEK293_24H:B13	BRD-K76908866	CP-724714	HEK293	trt_cp	10 uM	24 h	3	199	0.1705	0.18626	0	0	1	1	0	Tyrosine kinase inhibitor|EGFR inhibitor	ERBB2	-0.4842	0.8874	-1.4575
ERG020_VCAP_24H:BRD-K26573499:10	BRD-K26573499	DMAB-anabaseine	VCAP	trt_cp	10 uM	24 h	3	110	0.18	0.142286	1	1	1	1	0	Adrenergic receptor agonist	CHRNA7	-0.4841	0.8874	-1.4572
REP.B006_HA1E_24H:C02	BRD-K19412355	SB-242235	HA1E	trt_cp	0.74 uM	24 h	2	121	0.157	0.139371	1	1	1	1	0	P38 MAPK inhibitor	HSPB1|MAPK14	-0.4841	0.8874	-1.4571
REP.B028_HA1E_24H:N15	BRD-K96936751	bretazenil	HA1E	trt_cp	0.25 uM	24 h	2	88	0.2322	0.144545	1	1	1	1	0	GABA receptor agonist	GABRA1|GABRA2|GABRA3|GABRA5|GABRA4|GABRA6	-0.484	0.8874	-1.457
LCP001_MCF10A.PIK3CA.HH_24H:O19	BRD-K09537769	NU-7026	MCF10A	trt_cp	10 uM	24 h	3	42	0.4	0.131065	1	1	1	1	0	DNA inhibitor|MTOR inhibitor|PI3K inhibitor	PRKDC	-0.484	0.8874	-1.4569
REP.B001_HA1E_24H:F02	BRD-K26619122	BRD-K26619122	HA1E	trt_cp	0.74 uM	24 h	2	63	0.2865	0.135851	1	1	1	1	0	GABA receptor antagonist	GABRA1|GABRB2|GABRG2|GLRA1|GLRB	-0.484	0.8874	-1.4568
CPC014_SKB_24H:BRD-K63915849-001-01-1:10	BRD-K63915849	AS-604850	SKB	trt_cp	10 uM	24 h	3	129	0.1	0.114849	0	0	1	1	0	PI3K inhibitor	PIK3CG|PIK3CA	-0.4839	0.8874	-1.4567
REP.B018_HEK293_24H:J23	BRD-K64925568	AMG-232	HEK293	trt_cp	0.03 uM	24 h	2	77	0.0647	0.071372	0	0	1	1	0	MDM inhibitor	MDM2	-0.4839	0.8874	-1.4567
EMU001_OCILY19_24H:F14	BRD-A30655177	LFM-A13	OCILY19	trt_cp	2.5 uM	24 h	3	84	0.2621	0.150039	1	1	1	1	0	BTK inhibitor	BTK	-0.4838	0.8874	-1.4565
REP.A025_A375_24H:O24	BRD-K73381542	phenylephrine	A375	trt_cp	0.04 uM	24 h	3	130	0.2161	0.169484	1	1	1	1	0	Adrenergic receptor agonist	ADRA1A|ADRA1B|ADRA1D	-0.4839	0.8874	-1.4565
CPC018_MCF7_6H:BRD-K20313525-001-03-8:10	BRD-K20313525	rosmarinic-acid	MCF7	trt_cp	10 uM	6 h	3	112	0.24	0.165785	1	0	1	1	0	GABA receptor antagonist	MCL1|TYR	-0.4838	0.8874	-1.4564
CPC003_VCAP_24H:BRD-K91315211-300-03-2:10	BRD-K91315211	betahistine	VCAP	trt_cp	10 uM	24 h	2	170	0.31	0.232132	1	1	1	1	0	Histamine receptor agonist|Histamine receptor antagonist	HRH3|HRH1	-0.4838	0.8874	-1.4563
CPC016_HEPG2_6H:BRD-K70487031-001-01-0:10	BRD-K70487031	flupentixol	HEPG2	trt_cp	10 uM	6 h	3	179	0.26	0.218144	1	0	1	1	0	Dopamine receptor antagonist	DRD2|DRD1|ADRA1A|CHRM1|DRD3|DRD5|HTR2A	-0.4838	0.8874	-1.4562
CPC014_VCAP_24H:BRD-K70401845-001-02-5:10	BRD-K70401845	erlotinib	VCAP	trt_cp	10 uM	24 h	5	210	0.35	0.274141	0	0	1	1	0	EGFR inhibitor	EGFR|NR1I2	-0.4837	0.8874	-1.456
CPD002_PC3_6H:BRD-K04196797-001-17-8:10	BRD-K04196797	oxcarbazepine	PC3	trt_cp	10 uM	6 h	3	218	0.34	0.275295	0	0	1	1	0	Sodium channel inhibitor	SCN1A|SCN3A|SCN5A|CYP2C19|CYP3A4|CYP3A5|SCN10A|SCN11A|SCN2A|SCN4A|SCN7A|SCN8A|SCN9A	-0.4837	0.8874	-1.4559
LJP007_HEK293_24H:L22	BRD-K72420232	WZ-4002	HEK293	trt_cp	0.37 uM	24 h	2	66	0.1949	0.114685	1	0	1	1	0	EGFR inhibitor	EGFR|ERBB2	-0.4836	0.8874	-1.4558
CPC005_PC3_24H:BRD-A92439610-001-03-2:10	BRD-A92439610	BRD-A92439610	PC3	trt_cp	10 uM	24 h	5	210	0.27	0.240781	1	1	1	1	0	Immunosuppressant|Corticosteroid agonist|Glucocorticoid receptor agonist	NR3C1|CYP3A5|CYP3A7	-0.4836	0.8874	-1.4558
REP.A015_MDAMB231_24H:P09	BRD-A61221616	medroxyprogesterone-acetate	MDAMB231	trt_cp	1.11 uM	24 h	2	200	0.417	0.292021	1	1	1	1	0	Progesterone receptor agonist	PGR	-0.4836	0.8874	-1.4557
LCP001_MCF10A.WT_6H:P16	BRD-K35329391	GZD-824	MCF10A	trt_cp	10 uM	6 h	3	248	0.5379	0.369324	1	1	1	1	0	Bcr-Abl inhibitor	ABL1|BCR	-0.4836	0.8874	-1.4556
LIVB002_HUH7_72H:E11	BRD-A37441042	tulobuterol	HUH7	trt_cp	15 uM	72 h	3	89	0.12	0.1045	0	0	1	1	0	Adrenergic receptor agonist	ADRB2	-0.4836	0.8874	-1.4556
CPC017_MCF7_6H:BRD-K26015241-001-01-0:10	BRD-K26015241	ODQ	MCF7	trt_cp	10 uM	6 h	4	190	0.16	0.176306	1	0	1	1	0	Guanylyl cyclase inhibitor	GUCY1A2|GUCY1A3|GUCY1B3	-0.4835	0.8874	-1.4554
REP.B021_HEK293_24H:G23	BRD-K82967685	mirodenafil	HEK293	trt_cp	0.03 uM	24 h	2	96	0.0607	0.0771899	0	0	1	1	0	Phosphodiesterase inhibitor	PDE5A	-0.4834	0.886	-1.4553
REP.A020_MCF7_24H:A13	BRD-A83081521	finasteride	MCF7	trt_cp	10 uM	24 h	3	116	0.2999	0.188603	1	1	1	1	0	5-alpha reductase inhibitor	SRD5A2|SRD5A1|AR|AKR1D1	-0.4834	0.886	-1.4553
CPC011_MCF7_6H:BRD-K85503079-003-08-1:10	BRD-K85503079	perospirone	MCF7	trt_cp	10 uM	6 h	2	64	0.22	0.119986	1	0	1	1	0	Dopamine receptor antagonist|Serotonin receptor antagonist	DRD2|HTR2A|HTR2C|DRD3|DRD4	-0.4834	0.886	-1.4552
CPC012_MCF7_24H:BRD-K51941867-001-01-8:10	BRD-K51941867	LM-1685	MCF7	trt_cp	10 uM	24 h	4	232	0.11	0.161537	1	0	1	1	0	Cyclooxygenase inhibitor	PTGS2	-0.4834	0.886	-1.4552
CPC005_VCAP_6H:BRD-K08973992-001-03-9:10	BRD-K08973992	linoleic-acid	VCAP	trt_cp	10 uM	6 h	4	90	0.08	0.0858019	0	0	1	1	0	Oxidizing agent	FABP4|FFAR1|FFAR4|HNF4A|KCNB1|PPARG|TRPM8	-0.4834	0.886	-1.455
REP.B004_HELA_24H:G01	BRD-K21908111	AZD-1208	HELA	trt_cp	2.22 uM	24 h	3	167	0.2608	0.211029	1	1	1	1	0	PIM inhibitor	PIM1|PIM2|PIM3	-0.4831	0.886	-1.4544
REP.A023_MCF7_24H:I10	BRD-K70505054	ranitidine	MCF7	trt_cp	0.37 uM	24 h	3	124	0.3995	0.225061	1	1	1	1	0	Histamine receptor antagonist	HRH2|SLC22A2	-0.4831	0.886	-1.4543
REP.B021_HEK293_24H:C15	BRD-K81528515	nilotinib	HEK293	trt_cp	0.25 uM	24 h	2	74	0.1115	0.091851	0	0	1	1	0	Bcr-Abl inhibitor|Abl inhibitor	ABL1|KIT|BCR|CYP2B6|CYP2C8|DDR1|DDR2|PDGFRA	-0.4831	0.886	-1.4542
REP.A025_YAPC_24H:G07	BRD-K73815512	HC-030031	YAPC	trt_cp	10 uM	24 h	3	80	0.1703	0.118027	1	0	1	1	0	TRPA1 channel blocker	TRPA1	-0.483	0.886	-1.4539
CPC011_A549_24H:BRD-A49172652-001-23-0:10	BRD-A49172652	lansoprazole	A549	trt_cp	10 uM	24 h	3	85	0.12	0.102125	1	0	1	1	0	Proton pump inhibitor	ATP4A|CYP2C19|CYP3A4|CYP3A5|ATP4B	-0.483	0.886	-1.4539
CPC006_HEPG2_6H:BRD-K17349619-003-01-4:10	BRD-K17349619	HLI-373	HEPG2	trt_cp	10 uM	6 h	3	143	0.13	0.13787	1	0	1	1	0	MDM inhibitor	MDM2	-0.4829	0.886	-1.4538
REP.B005_HELA_24H:K17	BRD-K10843433	phenylbutazone	HELA	trt_cp	0.03 uM	24 h	3	177	0.4239	0.27698	1	1	1	1	0	Cyclooxygenase inhibitor|Prostanoid receptor antagonist	PTGS2|PTGS1|PTGIS	-0.4829	0.886	-1.4537
MOAR002_A375_24H:P01	BRD-K87718015	dynasore	A375	trt_cp	10 uM	24 h	3	505	0.66	0.583779	1	1	1	1	0	Dynamin inhibitor	DNM1|DNM1L|DNM2	-0.4829	0.886	-1.4537
REP.A022_HEK293_24H:M01	BRD-K68938568	GDC-0152	HEK293	trt_cp	10 uM	24 h	3	127	0.1086	0.118754	0	0	1	1	0	XIAP inhibitor	BIRC2|BIRC3|BIRC7|XIAP	-0.4829	0.886	-1.4536
CPC016_NPC_24H:BRD-A93659613-051-03-6:10	BRD-A93659613	GR-89696	NPC	trt_cp	10 uM	24 h	4	180	0.08	0.121342	0	0	1	1	0	Opioid receptor agonist	OPRK1	-0.4829	0.886	-1.4536
CPC009_MCF7_6H:BRD-K27539181-001-05-1:10	BRD-K27539181	ML-193	MCF7	trt_cp	10 uM	6 h	3	129	0.2	0.16242	1	1	1	1	0	G protein-coupled receptor antagonist	GPR55	-0.4828	0.886	-1.4534
LJP007_HUVEC_24H:N03	BRD-K09991945	BRD-K09991945	HUVEC	trt_cp	1.11 uM	24 h	3	400	0.3335	0.369325	1	1	1	1	0	PKC inhibitor	GSK3B	-0.4828	0.886	-1.4533
PAC004_U2OS_6H:BRD-K14441456-001-01-2:10	BRD-K14441456	BRD-K14441456	U2OS	trt_cp	10 uM	6 h	2	73	0.18	0.115912	1	1	1	1	0	EGFR inhibitor	EGFR	-0.4828	0.886	-1.4533
REP.B021_HELA_24H:F14	BRD-A82395837	ginkgolide-b	HELA	trt_cp	0.74 uM	24 h	2	157	0.4366	0.264742	1	1	1	1	0	Platelet activating factor receptor antagonist|GABA receptor antagonist|Glycine receptor antagonist|Immunosuppressant|Peptidase inhibitor|Protease inhibitor|Reducing agent	PTAFR|GLRA1|GLRB|GLRA2|GLRA3|HTR3A|HTR3B	-0.4828	0.886	-1.4533
REP.B007_A375_24H:P09	BRD-K40175214	torin-1	A375	trt_cp	0.25 uM	24 h	2	400	0.6758	0.525738	1	1	1	1	0	MTOR inhibitor|PI3K inhibitor	MTOR|PIK3CA	-0.4827	0.886	-1.4531
CPD002_MCF7_24H:BRD-K72542090-304-01-6:10	BRD-K72542090	clodronic-acid	MCF7	trt_cp	10 uM	24 h	3	106	0.3	0.18032	1	0	1	1	0	Bone resorption inhibitor	SLC25A4|SLC25A5|SLC25A6	-0.4827	0.886	-1.453
CPC001_PC3_24H:N21	BRD-K00486786	Ro-08-2750	PC3	trt_cp	10 uM	24 h	5	181	0.1537	0.168658	1	0	1	1	0	NGF binding inhibitor	NGFR|NGF	-0.4826	0.886	-1.4528
LJP001_BT20_24H:BRD-K50140147-001-05-1:2	BRD-K50140147	NVP-TAE684	BT20	trt_cp	2.22 uM	24 h	4	178	0.45	0.286185	1	1	1	1	0	ALK inhibitor	ALK|INSR	-0.4826	0.886	-1.4527
CPC006_A375_6H:C11	BRD-K88560311	rucaparib	A375	trt_cp	10 uM	6 h	5	196	0.2945	0.242941	1	1	1	1	0	PARP inhibitor	PARP1|PARP2	-0.4825	0.8858	-1.4524
LJP009_JURKAT_24H:O08	BRD-A29901043	KIN001-127	JURKAT	trt_cp	3.33 uM	24 h	3	73	0.2283	0.13054	1	1	1	1	0	ITK inhibitor	ITK	-0.4825	0.8857	-1.4523
PBIOA015_HT29_24H:C07	BRD-K37312348	kenpaullone	HT29	trt_cp	15 uM	24 h	3	533	0.82	0.6685	1	1	1	1	0	CDK inhibitor|GSK inhibitor	GSK3B|CDK1|CDK5|CDK2|LCK|CCNB1	-0.4824	0.8854	-1.4522
REP.A002_A375_24H:F13	BRD-K16542329	zaprinast	A375	trt_cp	10 uM	24 h	3	134	0.2186	0.173065	1	1	1	1	0	Phosphodiesterase inhibitor	PDE5A|GPR35|PDE1A|PDE4D|PDE9A	-0.4824	0.8832	-1.4521
CPC014_SKB_24H:BRD-K43764301-001-07-6:10	BRD-K43764301	dexketoprofen	SKB	trt_cp	10 uM	24 h	4	164	0.24	0.200613	0	0	1	1	0	Cyclooxygenase inhibitor	PTGS2|PTGS1	-0.4824	0.8834	-1.4521
LJP009_MCF10A_24H:L01	BRD-K70642949	GSK-2334470	MCF10A	trt_cp	10 uM	24 h	2	243	0.4975	0.351585	1	1	1	1	0	PDK inhibitor	PDPK1|AURKA|AURKB|PDK1	-0.4824	0.8834	-1.4521
CPC017_PHH_24H:BRD-A14574269-051-01-4:10	BRD-A14574269	UB-165	PHH	trt_cp	10 uM	24 h	3	95	0.16	0.124667	0	0	1	1	0	Acetylcholine receptor agonist	CHRNA3|CHRNA4|CHRNB2	-0.4824	0.8827	-1.452
REP.A022_YAPC_24H:L16	BRD-K67789209	adatanserin	YAPC	trt_cp	0.37 uM	24 h	3	152	0.3123	0.220312	1	1	1	1	0	Serotonin receptor agonist|Serotonin receptor antagonist	HTR1A|HTR2A	-0.4823	0.8826	-1.4517
LJP009_HT29_24H:H02	BRD-K53281329	BAY-61-3606	HT29	trt_cp	3.33 uM	24 h	2	104	0.3293	0.18713	1	1	1	1	0	Syk inhibitor	SYK	-0.4823	0.8826	-1.4517
PBIOA019_HEPG2_24H:I19	BRD-K71106091	fludarabine-phosphate	HEPG2	trt_cp	10 uM	24 h	3	121	0.26	0.179354	1	0	1	1	0	DNA inhibitor|DNA repair enzyme inhibitor|Purine antagonist	POLA1|RRM1|DCK|POLD1|POLE|RRM2|RRM2B	-0.4822	0.8826	-1.4516
CPC001_PC3_6H:BRD-K05464208-001-01-6:10	BRD-K05464208	JX-401	PC3	trt_cp	10 uM	6 h	4	129	0.23	0.174176	1	1	1	1	0	P38 MAPK inhibitor	MAPK14	-0.4822	0.8826	-1.4515
REP.A023_HA1E_24H:E19	BRD-K69116396	sertindole	HA1E	trt_cp	10 uM	24 h	3	319	0.5697	0.431071	1	1	1	1	0	Dopamine receptor antagonist|Serotonin receptor antagonist	DRD2|HTR2A|HTR2C|ADRA1A|ADRA1B|ADRA1D|DRD3|DRD4|HRH1|HTR1A|HTR1B|HTR1D|HTR1E|HTR1F|HTR6|KCNH2	-0.4821	0.8822	-1.4511
REP.B018_YAPC_24H:L04	BRD-A65248799	EMD-53998	YAPC	trt_cp	0.08 uM	24 h	2	91	0.1774	0.128478	1	1	1	1	0	Phosphodiesterase inhibitor	PDE3A|TNNC1	-0.482	0.8821	-1.451
LJP008_ASC.C_24H:N09	BRD-K47029922	tranylcypromine	ASC	trt_cp	1.11 uM	24 h	2	58	0.2539	0.122709	1	1	1	1	0	Monoamine oxidase inhibitor	MAOA|MAOB|KDM1A|CYP2A6	-0.482	0.8819	-1.4509
CPC017_SKB_24H:BRD-A62071884-001-02-0:10	BRD-A62071884	siguazodan	SKB	trt_cp	10 uM	24 h	2	175	0.37	0.257306	1	0	1	1	0	Phosphodiesterase inhibitor	PDE3A	-0.482	0.882	-1.4509
REP.B019_HELA_24H:H15	BRD-K47639036	flavoxate	HELA	trt_cp	0.25 uM	24 h	2	107	0.3393	0.19267	1	0	1	1	0	Acetylcholine receptor antagonist	CHRM1|CHRM2	-0.4819	0.8778	-1.4506
REP.A009_A375_24H:L01	BRD-K32164935	tolazamide	A375	trt_cp	10 uM	24 h	3	197	0.3006	0.24607	0	0	1	1	0	ATP channel blocker	ABCC8|KCNJ1|KCNJ10|KCNJ11	-0.4819	0.8778	-1.4505
REP.A026_A375_24H:O24	BRD-A20348246	chlormezanone	A375	trt_cp	0.04 uM	24 h	3	229	0.2457	0.239856	0	0	1	1	0	GABA receptor antagonist	GABRA1|TSPO	-0.4818	0.8778	-1.4504
EMU001_THP1_6H:L01	BRD-K92428153	mycophenolate-mofetil	THP1	trt_cp	10 uM	6 h	3	262	0.436	0.341763	0	0	1	1	0	Inosine monophosphate dehydrogenase inhibitor|Dehydrogenase inhibitor|Hydroxycarboxylic acid receptor agonist|Immunosuppressant|Inositol monophosphatase inhibitor	IMPDH1|IMPDH2|HCAR2	-0.4818	0.8778	-1.4504
LJP001_SKBR3_6H:BRD-K04923131-001-10-5:10	BRD-K04923131	BRD-K04923131	SKBR3	trt_cp	10 uM	6 h	4	331	0.54	0.427505	1	1	1	1	0	GSK inhibitor|Lipoxygenase inhibitor	GSK3B|ALOX5|GSK3A	-0.4818	0.8778	-1.4504
REP.A028_YAPC_24H:M19	BRD-K97010173	deferasirox	YAPC	trt_cp	10 uM	24 h	2	346	0.5511	0.441554	0	0	1	1	0	Chelating agent	CYP2C19|CYP2C8|CYP3A4	-0.4818	0.8778	-1.4502
REP.A028_HELA_24H:P01	BRD-K97399794	quercetin	HELA	trt_cp	10 uM	24 h	3	464	0.6544	0.5572	1	1	1	1	0	Polar auxin transport inhibitor	PIK3CG|AKR1B1|CYP2C8|EGFR|GAA|MAOA|PTPN1|SCN5A|SIRT1|XDH|ATP5A1|ATP5B|ATP5C1|HCK|HIBCH|PIM1|STK17B|UGT3A1	-0.4818	0.8778	-1.4502
REP.B019_HELA_24H:D13	BRD-K45503887	delivert	HELA	trt_cp	2.22 uM	24 h	2	66	0.0993	0.081861	1	0	1	1	0	Angiotensin receptor agonist	AGTR1|AGTR2	-0.4817	0.8778	-1.4501
CPC006_A375_24H:BRD-K48692744-001-01-2:10	BRD-K48692744	NU-1025	A375	trt_cp	10 uM	24 h	5	105	0.25	0.163831	1	0	1	1	0	PARP inhibitor|DNA dependent protein kinase inhibitor	PARP1	-0.4817	0.8778	-1.4499
REP.B014_A375_24H:G19	BRD-K60341624	GSK-1292263	A375	trt_cp	2.22 uM	24 h	2	68	0.2996	0.14433	1	1	1	1	0	Glucose dependent insulinotropic receptor agonist	GPR119|GRPR	-0.4816	0.8778	-1.4498
REP.B027_PC3_24H:A16	BRD-A92630576	trimebutine	PC3	trt_cp	0.08 uM	24 h	2	87	0.1774	0.125622	1	1	1	1	0	Opioid receptor agonist	CHRM1|CHRM2|CHRM3|CHRM4|OPRD1|OPRK1|OPRM1	-0.4816	0.8778	-1.4498
REP.B028_MCF7_24H:N14	BRD-K96936751	bretazenil	MCF7	trt_cp	0.74 uM	24 h	2	111	0.2572	0.170855	1	1	1	1	0	GABA receptor agonist	GABRA1|GABRA2|GABRA3|GABRA5|GABRA4|GABRA6	-0.4815	0.8778	-1.4495
REP.A023_HT29_24H:O24	BRD-K73107279	levamisole	HT29	trt_cp	0.04 uM	24 h	3	132	0.239	0.179604	1	1	1	1	0	Acetylcholine receptor agonist	ALPL|ALPPL2|CHRNA3	-0.4815	0.8778	-1.4495
REP.B017_HA1E_24H:A14	BRD-A50764878	MDL-73005EF	HA1E	trt_cp	0.74 uM	24 h	2	81	0.1139	0.0971259	1	0	1	1	0	Serotonin receptor antagonist	HTR1A	-0.4814	0.8776	-1.4492
REP.A009_HEK293_24H:H12	BRD-A30984645	GDC-0834	HEK293	trt_cp	0.04 uM	24 h	3	108	0.2009	0.148947	1	0	1	1	0	BTK inhibitor	BTK	-0.4814	0.8777	-1.4492
LJP001_BT20_6H:BRD-K64800655-001-03-3:10	BRD-K64800655	PHA-793887	BT20	trt_cp	10 uM	6 h	4	448	0.66	0.549847	1	1	1	1	0	CDK inhibitor	CDK1|CDK2|CDK4|CDK5|CCND1|CCNE1|CDK7|CDK9	-0.4813	0.8745	-1.4487
ASG002_A549_24H:H04	BRD-K02113016	olaparib	A549	trt_cp	10 uM	24 h	2	83	0.2639	0.149654	1	1	1	1	0	PARP inhibitor	PARP1|PARP2|PARP3	-0.4811	0.8729	-1.4483
CPC018_PHH_24H:BRD-K24023109-003-11-2:10	BRD-K24023109	diltiazem	PHH	trt_cp	10 uM	24 h	3	84	0.1	0.0926766	0	0	1	1	0	Calcium channel blocker	CACNA1C|CYP3A5|CYP3A7|CACNA1S|CACNA2D1|CACNG1|HTR3A|KCNA5	-0.4811	0.8731	-1.4483
REP.B017_A549_24H:A18	BRD-A50764878	MDL-73005EF	A549	trt_cp	0.01 uM	24 h	2	122	0.3186	0.199358	1	1	1	1	0	Serotonin receptor antagonist	HTR1A	-0.4811	0.8729	-1.4482
REP.B011_MDAMB231_24H:A18	BRD-A03623303	metoprolol	MDAMB231	trt_cp	0.01 uM	24 h	2	120	0.1382	0.130219	0	0	1	1	0	Adrenergic receptor antagonist	ADRB1|ADRB2	-0.481	0.8729	-1.4478
CPC017_MCF7_6H:BRD-K67860401-001-01-5:10	BRD-K67860401	AR-A014418	MCF7	trt_cp	10 uM	6 h	4	135	0.23	0.178181	1	1	1	1	0	GSK inhibitor	GSK3B	-0.4809	0.8729	-1.4477
REP.B003_MCF7_24H:L17	BRD-K34713073	PD-123319	MCF7	trt_cp	0.03 uM	24 h	2	136	0.2199	0.174869	0	0	1	1	0	ACE inhibitor	AGTR2	-0.4808	0.8729	-1.4473
REP.A011_YAPC_24H:A24	BRD-K04112579	nepafenac	YAPC	trt_cp	0.04 uM	24 h	3	167	0.3019	0.227049	0	0	1	1	0	Cyclooxygenase inhibitor	PTGS2|PTGS1	-0.4808	0.8729	-1.4473
CPC020_HT29_6H:BRD-K10016611-003-02-2:10	BRD-K10016611	BRD-K10016611	HT29	trt_cp	10 uM	6 h	4	237	0.21	0.225587	1	0	1	1	0	Acetylcholinesterase inhibitor	ACHE	-0.4808	0.8729	-1.4472
REP.A014_HELA_24H:E12	BRD-K58486055	reparixin	HELA	trt_cp	0.04 uM	24 h	3	213	0.4169	0.301326	1	1	1	1	0	CC chemokine receptor antagonist	CXCR1|CXCR2	-0.4808	0.8729	-1.4472
CPC018_A375_6H:BRD-K74913225-001-03-3:10	BRD-K74913225	brinzolamide	A375	trt_cp	10 uM	6 h	5	129	0.2	0.16242	0	0	1	1	0	Carbonic anhydrase inhibitor	CA2|CA7|CA1|CYP2B6|CYP2C8|CA12|CA14|CA4|CA5A	-0.4806	0.8729	-1.4467
CPC001_HCC515_6H:BRD-K53318339-001-05-8:10	BRD-K53318339	vinpocetine	HCC515	trt_cp	10 uM	6 h	2	52	0.19	0.10051	1	0	1	1	0	Phosphodiesterase inhibitor|Sodium channel blocker	PDE1A|SCN10A|PDE1C	-0.4805	0.8729	-1.4463
CPC013_NPC_24H:BRD-K64785675-001-01-6:10	BRD-K64785675	TG-100115	NPC	trt_cp	10 uM	24 h	3	93	0.16	0.123348	0	0	1	1	0	PI3K inhibitor	PIK3CG|PIK3CA|PIK3CB|PIK3CD	-0.4805	0.8729	-1.4463
CPC015_SKB_24H:BRD-K46018455-001-17-7:10	BRD-K46018455	bezafibrate	SKB	trt_cp	10 uM	24 h	2	115	0.04	0.0685819	0	0	1	1	0	PPAR receptor agonist	PPARA|PPARD|PPARG|HSD11B1|LPL	-0.4803	0.8729	-1.4459
CPC016_HEPG2_6H:BRD-K82823076-001-01-8:10	BRD-K82823076	Ro-15-4513	HEPG2	trt_cp	10 uM	6 h	3	268	0.21	0.239887	1	0	1	1	0	GABA receptor agonist	GABRA1|GABRA2|GABRA3|GABRA5|GABRA4|GABRA6|GABRB2|GABRG2	-0.4803	0.8729	-1.4458
CPC012_PC3_6H:BRD-A15010982-001-01-9:10	BRD-A15010982	HU-211	PC3	trt_cp	10 uM	6 h	4	180	0.25	0.214505	1	0	1	1	0	Glutamate receptor antagonist	CNR1|CNR2|GRIN1	-0.4802	0.8729	-1.4456
REP.B016_YAPC_24H:J07	BRD-K53979406	ALX-5407	YAPC	trt_cp	2.22 uM	24 h	2	63	0.3226	0.144156	1	1	1	1	0	Glycine transporter inhibitor	SLC6A9	-0.4802	0.8729	-1.4455
CPC014_PHH_24H:BRD-K38615104-001-06-8:10	BRD-K38615104	A-443654	PHH	trt_cp	10 uM	24 h	4	237	0.26	0.25101	0	0	1	1	0	AKT inhibitor	AKT1|AKT2	-0.4801	0.8729	-1.4452
REP.A016_JURKAT_24H:I16	BRD-K54006094	formoterol	JURKAT	trt_cp	0.37 uM	24 h	2	99	0.216	0.147868	1	0	1	1	0	Adrenergic receptor agonist	ADRB2|CYP2C19	-0.4801	0.8729	-1.4451
REP.B004_HA1E_24H:A17	BRD-K18779551	bifemelane	HA1E	trt_cp	0.03 uM	24 h	3	92	0.3335	0.177122	1	1	1	1	0	Acetylcholine receptor agonist	SLC6A2|MAOA|MAOB	-0.4801	0.8729	-1.4451
PBIOA014_A375_24H:I03	BRD-K51575138	TPCA-1	A375	trt_cp	1.11 uM	24 h	3	197	0.3	0.245824	1	1	1	1	0	IKK inhibitor	IKBKB	-0.4801	0.8729	-1.445
CPC017_HEPG2_6H:BRD-K89997465-001-05-3:10	BRD-K89997465	BRD-K89997465	HEPG2	trt_cp	10 uM	6 h	3	212	0.42	0.301733	1	1	1	1	0	Dopamine receptor antagonist	DRD2|DRD3|DRD4|HTR2A|ADRA2A|ADRA2B|ADRA2C|DRD1|DRD5|HRH1|HTR1A|HTR2C|HTR6|HTR7|KIF11|ADRA1A|ADRA1B|ADRA1D|CALM1|CHRM1|CHRM3|HRH4|HTR2B|KCNH2|ORM1|ORM2|SMPD1|TRPC5	-0.48	0.8729	-1.4449
CPC005_MCF7_6H:D11	BRD-K55677650	CO-101244	MCF7	trt_cp	10 uM	6 h	4	100	0.1498	0.123762	1	0	1	1	0	Ionotropic glutamate receptor antagonist	GRIN2B	-0.48	0.8729	-1.4448
CPC002_PC3_24H:BRD-K83322645-103-01-6:10	BRD-K83322645	L-693403	PC3	trt_cp	10 uM	24 h	5	109	0.17	0.137647	1	0	1	1	0	Sigma receptor agonist|Sigma receptor antagonist	DRD2|SIGMAR1	-0.4799	0.8729	-1.4447
CPC016_NEU_24H:BRD-K89402695-001-01-5:10	BRD-K89402695	L-655240	NEU	trt_cp	10 uM	24 h	3	124	0.11	0.118097	0	0	1	1	0	Thromboxane receptor antagonist	PTGES	-0.4799	0.8729	-1.4447
CPC006_HEPG2_6H:BRD-K73789395-001-06-5:102.71	BRD-K73789395	ZM-336372	HEPG2	trt_cp	100 uM	6 h	3	193	0.41	0.284447	1	1	1	1	0	RAF inhibitor	BRAF|LCK|MAPK14|RAF1	-0.4799	0.8729	-1.4446
REP.A010_HEK293_24H:I01	BRD-K13646352	midostaurin	HEK293	trt_cp	10 uM	24 h	3	263	0.3783	0.318953	1	1	1	1	0	FLT3 inhibitor|KIT inhibitor|PKC inhibitor	FLT3|KIT|CCNB1|FLT1|KDR|PDGFRB|PRKCA|VEGFA|PRKCG	-0.4798	0.8729	-1.4444
CPC013_NEU_24H:BRD-K63923597-001-02-7:10	BRD-K63923597	barasertib-HQPA	NEU	trt_cp	10 uM	24 h	2	263	0.42	0.336073	0	0	1	1	0	Aurora kinase inhibitor	AURKB|AURKC|AURKA	-0.4799	0.8729	-1.4444
REP.B004_HELA_3H:K19	BRD-K21718444	KW-2449	HELA	trt_cp	2.22 uM	3 h	3	187	0.3883	0.27248	1	1	1	1	0	Abl inhibitor|Aurora kinase inhibitor|FLT3 inhibitor	FLT3|ABL1|AURKA|FGFR1|AURKB	-0.4797	0.8729	-1.4441
REP.A015_HEK293_24H:H13	BRD-K58010567	vilazodone	HEK293	trt_cp	10 uM	24 h	3	68	0.2349	0.127799	1	0	1	1	0	Serotonin receptor antagonist	HTR1A|SLC6A4|CYP2C19|CYP2E1|DRD2|DRD3|HRH1|HTR4	-0.4797	0.8729	-1.444
CPC016_MCF7_24H:BRD-A85587465-001-02-5:10	BRD-A85587465	bemesetron	MCF7	trt_cp	10 uM	24 h	4	160	0.2	0.180886	1	0	1	1	0	Serotonin receptor antagonist	HTR3A|HTR3B	-0.4797	0.8729	-1.444
REP.A007_HA1E_24H:O14	BRD-A56359832	zileuton	HA1E	trt_cp	3.33 uM	24 h	3	63	0.1675	0.103874	1	1	1	1	0	Leukotriene inhibitor|Lipoxygenase inhibitor	ALOX5	-0.4797	0.8729	-1.444
LJP006_LNCAP_24H:K05	BRD-K13390322	AT-7519	LNCAP	trt_cp	0.12 uM	24 h	2	48	0.4156	0.14282	1	1	1	1	0	CDK inhibitor|Cell cycle inhibitor	CDK2|CDK1|CDK9|CDK4|CDK5|CDK6	-0.4796	0.8729	-1.4438
REP.B010_HT29_24H:J04	BRD-K13662825	dinaciclib	HT29	trt_cp	0.08 uM	24 h	2	206	0.3243	0.261359	1	1	1	1	0	CDK inhibitor	CDK1|CDK2|CDK9|CDK5|CCNT1	-0.4796	0.8729	-1.4437
CPC006_VCAP_24H:BRD-K93176058-001-02-8:10	BRD-K93176058	AC-55649	VCAP	trt_cp	10 uM	24 h	5	419	0.34	0.38166	1	0	1	1	0	Retinoid receptor agonist	RARB|RARA	-0.4796	0.8729	-1.4437
REP.B016_A375_24H:O18	BRD-A54880345	etomidate	A375	trt_cp	0.01 uM	24 h	2	115	0.189	0.149077	1	1	1	1	0	Membrane integrity inhibitor|Membrane permeability inhibitor|GABA receptor modulator	GABRA1|GABRA2|GABRA3|GABRA4|GABRA5|GABRA6|GABRB1|GABRB2|GABRB3|GABRD|GABRE|GABRG1|GABRG2|GABRG3|GABRP|GABRQ|ADRA2B	-0.4795	0.8729	-1.4435
REP.B021_HA1E_24H:J11	BRD-K83837640	JNJ-26481585	HA1E	trt_cp	0.03 uM	24 h	2	356	0.6785	0.49697	1	1	1	1	0	HDAC inhibitor	HDAC1|HDAC10|HDAC11|HDAC2|HDAC3|HDAC4|HDAC5|HDAC6|HDAC7|HDAC8|HDAC9|MDM2	-0.4795	0.8729	-1.4434
REP.B017_MCF10A_24H:E09	BRD-K62387885	basimglurant	MCF10A	trt_cp	0.25 uM	24 h	2	77	0.1154	0.0953189	1	1	1	1	0	Glutamate receptor antagonist	GRM5	-0.4794	0.8729	-1.4432
REP.A016_MCF7_24H:G01	BRD-K53061490	ozagrel	MCF7	trt_cp	10 uM	24 h	3	90	0.2473	0.150856	1	0	1	1	0	Thromboxane synthase inhibitor	TBXAS1	-0.4794	0.8729	-1.4432
CPC015_SKB_24H:BRD-A49447682-001-01-6:10	BRD-A49447682	BRD-A49447682	SKB	trt_cp	10 uM	24 h	2	150	0.45	0.262714	0	0	1	1	0	Glucocorticoid receptor agonist	NR3C1|PLA2G1B	-0.4794	0.8729	-1.4431
REP.B006_HT29_24H:A21	BRD-K19061412	mubritinib	HT29	trt_cp	0.25 uM	24 h	2	154	0.3324	0.228782	0	0	1	1	0	Receptor tyrosine protein kinase inhibitor	ERBB2|EGFR	-0.4794	0.8729	-1.443
LJP005_A375_24H:C08	BRD-K00337317	NU-7441	A375	trt_cp	3.33 uM	24 h	2	122	0.4028	0.224159	1	1	1	1	0	P-glycoprotein inhibitor|DNA dependent protein kinase inhibitor	PRKDC|ABCB1	-0.4793	0.8729	-1.4428
PBIOA013_HCC515_24H:O07	BRD-K37798499	etoposide	HCC515	trt_cp	10 uM	24 h	3	478	0.74	0.601396	1	1	1	1	0	Topoisomerase inhibitor	TOP2A|TOP2B|CYP2E1|CYP3A5	-0.4793	0.8729	-1.4428
CPC006_AGS_6H:BRD-K01638814-051-10-1:10	BRD-K01638814	rilmenidine	AGS	trt_cp	10 uM	6 h	2	46	0.13	0.0781954	1	0	1	1	0	Adrenergic receptor agonist|Imidazoline receptor agonist	NISCH|ADRA2A	-0.4793	0.8729	-1.4427
REP.B012_MCF10A_24H:L01	BRD-K02389548	RG-2833	MCF10A	trt_cp	2.22 uM	24 h	2	183	0.4684	0.29605	1	1	1	1	0	HDAC inhibitor	HDAC1|HDAC3	-0.4793	0.8729	-1.4427
REP.A015_JURKAT_24H:I12	BRD-K58626373	dexfenfluramine	JURKAT	trt_cp	0.04 uM	24 h	2	96	0.1538	0.12287	1	0	1	1	0	Serotonin receptor agonist	SLC6A4|HTR2C	-0.4792	0.8729	-1.4426
CPC018_PHH_24H:BRD-K91263825-001-03-6:10	BRD-K91263825	nortriptyline	PHH	trt_cp	10 uM	24 h	3	120	0.23	0.167991	0	0	1	1	0	Tricyclic antidepressant	KCNJ10|SLC6A2|SLC6A4|CYP2C19|PIK3CD|ADRA1A|ADRA1B|ADRA1D|ADRA2A|ADRA2B|ADRA2C|ADRB1|ADRB2|ADRB3|CHRM1|CHRM2|CHRM3|CHRM4|CHRM5|DRD2|HRH1|HTR1A|HTR2A|HTR2C|HTR6|PGRMC1|SIGMAR1	-0.4792	0.8729	-1.4425
CPC015_ASC_24H:BRD-A54880345-001-11-8:10	BRD-A54880345	etomidate	ASC	trt_cp	10 uM	24 h	4	139	0.07	0.099744	0	0	1	1	0	Membrane integrity inhibitor|Membrane permeability inhibitor|GABA receptor modulator	GABRA1|GABRA2|GABRA3|GABRA4|GABRA5|GABRA6|GABRB1|GABRB2|GABRB3|GABRD|GABRE|GABRG1|GABRG2|GABRG3|GABRP|GABRQ|ADRA2B	-0.4791	0.8729	-1.4423
REP.A026_A549_24H:F21	BRD-K89375097	pirenzepine	A549	trt_cp	1.11 uM	24 h	2	97	0.1381	0.117034	0	0	1	1	0	Acetylcholine receptor antagonist	CHRM1|CHRM2|CHRM3|CHRM4|CHRM5	-0.4791	0.8729	-1.4421
CPC015_A375_6H:BRD-A02180903-001-03-7:10	BRD-A02180903	betamethasone	A375	trt_cp	10 uM	6 h	3	130	0.34	0.212589	1	1	1	1	0	Glucocorticoid receptor agonist	NR3C1	-0.4791	0.8729	-1.4421
CPC002_HA1E_24H:BRD-K17743697-066-02-8:10	BRD-K17743697	KB-R7943	HA1E	trt_cp	10 uM	24 h	3	244	0.49	0.349642	1	1	1	1	0	Sodium channel inhibitor	SLC8A1|TRPC3|TRPC5|TRPC6	-0.4791	0.8729	-1.4421
CPC015_A549_6H:BRD-A34806832-001-02-7:10	BRD-A34806832	proscillaridin	A549	trt_cp	10 uM	6 h	2	199	0.46	0.30594	0	0	1	1	0	Na/K-ATPase inhibitor	ATP1A1	-0.4791	0.8729	-1.4421
CPC011_MCF7_24H:BRD-K20482099-001-06-0:10	BRD-K20482099	rutin	MCF7	trt_cp	10 uM	24 h	2	81	0.37	0.175055	0	0	1	1	0	Antioxidant|Capillary stabilizing agent|Nitric oxide scavenger	AKR1C3|AKR1B1	-0.4791	0.8729	-1.4421
CPC015_ASC_24H:BRD-K82562631-236-03-8:10	BRD-K82562631	tolmetin	ASC	trt_cp	10 uM	24 h	4	100	0.15	0.123844	0	0	1	1	0	Cyclooxygenase inhibitor	PTGS2|PTGS1	-0.4789	0.8729	-1.4417
CPC020_MCF7_24H:BRD-A67605442-001-01-7:10	BRD-A67605442	tetrahydrobiopterin	MCF7	trt_cp	10 uM	24 h	5	321	0.24	0.280665	1	0	1	1	0	Nitric oxide stimulant|Nitric oxide synthase stimulant|Phenylalanine 4-hydroxylase stimulant	PAH|TH	-0.4789	0.8729	-1.4416
ISO002_MCF10A.TP53.M_24H:C18	BRD-A63236097	BRD-A63236097	MCF10A	trt_cp	0.04 uM	24 h	2	46	0.2053	0.0982662	1	1	1	1	0	Tumor necrosis factor production inhibitor	NFKB1	-0.4789	0.8729	-1.4416
REP.B008_YAPC_24H:G19	BRD-K82164249	andarine	YAPC	trt_cp	2.22 uM	24 h	2	100	0.3902	0.199744	1	1	1	1	0	Androgen receptor antagonist	AR	-0.4789	0.8729	-1.4416
REP.A018_THP1_24H:L01	BRD-A65248799	EMD-53998	THP1	trt_cp	10 uM	24 h	2	124	0.0898	0.106704	0	0	1	1	0	Phosphodiesterase inhibitor	PDE3A|TNNC1	-0.4789	0.8729	-1.4416
CPC010_PC3_24H:BRD-K70751730-001-03-9:10	BRD-K70751730	IOX-1	PC3	trt_cp	10 uM	24 h	5	251	0.2	0.22656	1	0	1	1	0	Histone lysine demethylase inhibitor	KDM4A|EGLN1|KDM3A|KDM4C|KDM6B	-0.4789	0.8729	-1.4415
TAA001_SHSY5Y_24H:J04	BRD-A55579717	cytisine	SHSY5Y	trt_cp	0.37 uM	24 h	3	185	0.4	0.275072	0	0	1	1	0	Acetylcholine receptor agonist	CHRNA4|CHRNB2|CHRNA2|CHRNA3|CHRNA7|CHRNA6|CHRNB4	-0.4788	0.8729	-1.4414
LJP001_MCF7_24H:BRD-K64890080-001-09-6:0.08	BRD-K64890080	BI-2536	MCF7	trt_cp	0.08 uM	24 h	2	154	0.43	0.260211	1	1	1	1	0	PLK inhibitor	PLK1|BRD4|PLK2|PLK3	-0.4787	0.8729	-1.4411
MOAR001_A375_24H:B20	BRD-A72767275	nalmefene	A375	trt_cp	3.33 uM	24 h	2	53	0.0664	0.0599864	1	1	1	1	0	Opioid receptor antagonist	OPRK1|OPRM1|OPRD1	-0.4787	0.8729	-1.4411
MOAR007_A375_24H:J07	BRD-A35837007	bilobalide	A375	trt_cp	10 uM	24 h	3	107	0.22	0.155144	1	0	1	1	0	GABA receptor modulator	GLRA1|GLRA2|GLRB|HTR3A|HTR3B	-0.4787	0.8729	-1.441
PBIOA021_PC3_24H:N03	BRD-K34581968	BMS-536924	PC3	trt_cp	1.25 uM	24 h	3	127	0.28	0.190683	1	1	1	1	0	IGF-1 inhibitor	IGF1R|INSR|AKT1|CCNE1|CDK2|CYP3A4|ERBB2|KDR|LCK|MAPK1|MET|PDGFRA|PDGFRB	-0.4787	0.8729	-1.4409
MOAR016_HAP1.PRKACA_24H:G14	BRD-K13810148	givinostat	HAP1	trt_cp	0.66 uM	24 h	2	512	0.5809	0.551463	1	1	1	1	0	HDAC inhibitor	HDAC2|IL1B|IL1R2|IL6R|TNF|HDAC1|HDAC3|HDAC4|HDAC5|HDAC6|HDAC7|HDAC8|HDAC9	-0.4787	0.8729	-1.4408
REP.B003_HELA_24H:L14	BRD-K34713073	PD-123319	HELA	trt_cp	0.74 uM	24 h	3	212	0.5078	0.331776	1	1	1	1	0	ACE inhibitor	AGTR2	-0.4786	0.8729	-1.4407
REP.A004_HEK293_24H:C03	BRD-K19352500	prochlorperazine	HEK293	trt_cp	1.11 uM	24 h	3	46	0.2243	0.102713	0	0	1	1	0	Dopamine receptor antagonist	DRD2|DRD1|DRD3|DRD4	-0.4786	0.8729	-1.4407
REP.B017_MCF7_24H:E24	BRD-A62879835	rifaximin	MCF7	trt_cp	0.01 uM	24 h	2	71	0.0653	0.068852	1	0	1	1	0	RNA synthesis inhibitor	NR1I2|CYP3A4	-0.4786	0.8729	-1.4407
CPC006_NCIH596_6H:BRD-K56343971-001-02-3:10	BRD-K56343971	vemurafenib	NCIH596	trt_cp	10 uM	6 h	2	148	0.43	0.255091	1	1	1	1	0	RAF inhibitor	BRAF|CYP2C19|CYP3A4|CYP3A5|RAF1	-0.4786	0.8729	-1.4407
REP.A024_A375_24H:P17	BRD-K79602928	metformin	A375	trt_cp	0.125 uM	24 h	2	100	0.0834	0.092345	1	1	1	1	0	Insulin sensitizer	INS|ACACB|PRKAB1	-0.4786	0.8729	-1.4406
REP.A013_HA1E_24H:C13	BRD-A37959677	estrone	HA1E	trt_cp	10 uM	24 h	3	113	0.288	0.182417	0	0	1	1	0	Estrogen receptor agonist|Estrogenic hormone	ESR1|ESR2	-0.4786	0.8729	-1.4406
CPC017_PHH_24H:BRD-K34533029-001-01-0:10	BRD-K34533029	BRD-K34533029	PHH	trt_cp	10 uM	24 h	3	85	0.33	0.169355	0	0	1	1	0	EGFR inhibitor	EGFR	-0.4786	0.8729	-1.4406
CPC006_AGS_6H:BRD-A25004090-001-03-5:4.8	BRD-A25004090	erastin	AGS	trt_cp	4 uM	6 h	2	60	0.35	0.146535	1	1	1	1	0	Ion channel antagonist	VDAC2	-0.4785	0.8729	-1.4403
REP.A025_PC3_24H:H20	BRD-A74391928	ibutilide	PC3	trt_cp	3.33 uM	24 h	2	107	0.3323	0.190672	1	1	1	1	0	Potassium channel antagonist	KCNH2|CACNA1C|SCN5A|CACNA2D1|CACNB1|CACNG1|KCNH6|KCNH7|KCNJ11|KCNK1|KCNK6	-0.4785	0.8729	-1.4403
CPC013_MCF7_6H:BRD-K61192372-001-01-4:10	BRD-K61192372	capecitabine	MCF7	trt_cp	10 uM	6 h	4	179	0.12	0.1482	1	0	1	1	0	DNA inhibitor|Thymidylate synthase inhibitor	TYMS|DPYD	-0.4785	0.8729	-1.4402
REP.B009_THP1_24H:M24	BRD-A33692381	zidovudine	THP1	trt_cp	0.01 uM	24 h	2	106	0.1927	0.144519	0	0	1	1	0	Reverse transcriptase inhibitor	TERT	-0.4784	0.8729	-1.44
CPD003_PC3_24H:BRD-K73196317-003-09-8:10	BRD-K73196317	urapidil	PC3	trt_cp	10 uM	24 h	2	120	0.39	0.218753	0	0	1	1	0	Adrenergic receptor antagonist	HTR1A	-0.4784	0.8729	-1.44
REP.A027_MDAMB231_24H:K17	BRD-K95412502	istaroxime	MDAMB231	trt_cp	0.125 uM	24 h	2	189	0.3275	0.251575	0	0	1	1	0	ATPase inhibitor	ATP1A1|ATP1A2|ATP1A3|ATP1A4|ATP1B1|ATP1B2|ATP1B3|ATP1B4|FXYD2	-0.4783	0.8729	-1.4399
CPC002_VCAP_24H:BRD-K72029282-001-15-4:10	BRD-K72029282	probucol	VCAP	trt_cp	10 uM	24 h	3	154	0.32	0.224474	1	0	1	1	0	Atherogenesis inhibitor	ABCA1|ABCB11|CES1	-0.4783	0.8729	-1.4398
REP.A006_YAPC_24H:A11	BRD-K18895904	olanzapine	YAPC	trt_cp	0.125 uM	24 h	3	143	0.2751	0.20056	1	1	1	1	0	Dopamine receptor antagonist|Serotonin receptor antagonist	DRD2|HTR2A|HTR2C|DRD3|DRD4|DRD1|HRH1|HTR1A|HTR1B|HTR1D|HTR1E|HTR6|HTR7|CYP2C8|ADRA1A|ADRA1B|ADRA2A|ADRA2B|ADRA2C|ADRB1|ADRB2|ADRB3|CHRM1|CHRM2|CHRM3|CHRM4|CHRM5|DRD5|GABRA1|GABRA2|GABRA3|GABRA4|GABRA5|GABRA6|GABRB1|GABRB2|GABRB3|GABRD|GABRE|GABRG1|GABRG2|GABRG3|GABRP|GABRQ|HRH2|HRH4|HTR1F|HTR2B|HTR3A|HTR5A	-0.4783	0.8729	-1.4397
CPC006_PC3_24H:F12	BRD-K10705233	GW-405833	PC3	trt_cp	40 uM	24 h	5	414	0.5104	0.464821	1	1	1	1	0	Cannabinoid receptor agonist	CNR2	-0.4782	0.8729	-1.4396
LJP006_HS578T_24H:K16	BRD-K50140147	NVP-TAE684	HS578T	trt_cp	0.37 uM	24 h	3	96	0.48	0.217064	1	1	1	1	0	ALK inhibitor	ALK|INSR	-0.4781	0.8729	-1.4393
REP.A026_PC3_24H:J07	BRD-K91263825	nortriptyline	PC3	trt_cp	10 uM	24 h	2	135	0.2466	0.184499	0	0	1	1	0	Tricyclic antidepressant	KCNJ10|SLC6A2|SLC6A4|CYP2C19|PIK3CD|ADRA1A|ADRA1B|ADRA1D|ADRA2A|ADRA2B|ADRA2C|ADRB1|ADRB2|ADRB3|CHRM1|CHRM2|CHRM3|CHRM4|CHRM5|DRD2|HRH1|HTR1A|HTR2A|HTR2C|HTR6|PGRMC1|SIGMAR1	-0.4781	0.8729	-1.4393
REP.A015_HELA_24H:I19	BRD-K59013864	AM-24	HELA	trt_cp	10 uM	24 h	3	112	0.3595	0.202903	1	1	1	1	0	Lipoxygenase inhibitor	ALOX5|SELL	-0.4781	0.8729	-1.4392
REP.B010_MDAMB231_24H:N24	BRD-K01638814	rilmenidine	MDAMB231	trt_cp	0.01 uM	24 h	2	114	0.1684	0.140105	0	0	1	1	0	Adrenergic receptor agonist|Imidazoline receptor agonist	NISCH|ADRA2A	-0.4781	0.8729	-1.4391
CPC014_NEU_24H:BRD-K43797669-001-13-0:10	BRD-K43797669	genistein	NEU	trt_cp	10 uM	24 h	2	140	0.04	0.0756701	0	0	1	1	0	Tyrosine kinase inhibitor	CFTR|ESR2|EGFR|ESR1|ESRRA|ESRRB|ESRRG|NCOA1|NCOA2|PPARG|PTK2B|TOP2A|TRPC5	-0.478	0.8729	-1.439
CPC014_A375_6H:H24	BRD-K50720187	flupirtine	A375	trt_cp	10 uM	6 h	2	97	0.1487	0.121443	1	0	1	1	0	Glutamate receptor antagonist	KCNQ2|KCNQ3|ADRA2A|KCNQ1	-0.478	0.8729	-1.439
REP.A014_YAPC_24H:E20	BRD-A59174698	ritodrine	YAPC	trt_cp	3.33 uM	24 h	3	171	0.3467	0.24621	1	1	1	1	0	Adrenergic receptor agonist	ADRB2	-0.4779	0.8729	-1.4385
REP.B016_HA1E_24H:P23	BRD-K64990520	apocynin	HA1E	trt_cp	0.03 uM	24 h	2	94	0.2827	0.164838	1	1	1	1	0	NADPH inhibitor	NOX3|NOX4	-0.4779	0.8729	-1.4385
LJP007_PC3_24H:M07	BRD-K99616396	motesanib	PC3	trt_cp	10 uM	24 h	2	70	0.2137	0.123675	1	1	1	1	0	KIT inhibitor|PDGFR inhibitor|VEGFR inhibitor	FLT1|FLT4|KDR|KIT|PDGFRA|RET	-0.4779	0.8729	-1.4385
REP.B017_MCF7_24H:M21	BRD-K62737565	gabapentin	MCF7	trt_cp	0.25 uM	24 h	2	68	0.2048	0.11933	1	1	1	1	0	Calcium channel blocker	CACNA2D1|CACNA2D2|CACNA1B|ADORA1|CACNA1A|CACNA1C|CACNA1D|CACNA1E|CACNA1F|CACNA1G|CACNA1H|CACNA1I|CACNA1S|CACNA2D3|CACNA2D4|CACNB1|CACNB2|CACNB3|CACNB4|CACNG1|CACNG2|CACNG3|CACNG4|CACNG5|CACNG6|CACNG7|CACNG8|GRIN1|GRIN2A|GRIN2B|GRIN2C|GRIN2D|GRIN3A|GRIN3B	-0.4778	0.8729	-1.4384
MUC.CP007_P1A82_24H:E19	BRD-K08109215	I-BET-762	P1A82	trt_cp	1.11 uM	24 h	3	297	0.6	0.426859	1	1	1	1	0	Bromodomain inhibitor	BRD2|BRD3|BRD4|APOA1	-0.4778	0.8729	-1.4382
CPC018_PHH_24H:BRD-K87919739-001-03-4:10	BRD-K87919739	BRD-K87919739	PHH	trt_cp	10 uM	24 h	3	158	0.15	0.15567	0	0	1	1	0	Receptor tyrosine protein kinase inhibitor	ERBB2	-0.4777	0.8722	-1.4381
REP.A015_MDAMB231_24H:I12	BRD-K58626373	dexfenfluramine	MDAMB231	trt_cp	0.04 uM	24 h	2	53	0.3933	0.145992	1	1	1	1	0	Serotonin receptor agonist	SLC6A4|HTR2C	-0.4776	0.868	-1.4378
REP.A019_MCF7_24H:D19	BRD-K45746021	CC-401	MCF7	trt_cp	10 uM	24 h	3	175	0.3198	0.239215	0	0	1	1	0	JNK inhibitor	MAPK8	-0.4776	0.8677	-1.4377
REP.B017_HEK293_24H:H03	BRD-K62996583	lidoflazine	HEK293	trt_cp	0.25 uM	24 h	2	77	0.1767	0.117949	1	1	1	1	0	Calcium channel blocker	SCN1A|SCN3A|SLC29A1	-0.4776	0.8677	-1.4376
CPC003_HCC515_24H:BRD-A75455249-001-12-9:10	BRD-A75455249	kavain	HCC515	trt_cp	10 uM	24 h	3	104	0.35	0.192922	1	1	1	1	0	Calcium channel blocker|Sodium channel inhibitor	MTOR	-0.4775	0.8677	-1.4374
EMU001_MINO_3H:B24	BRD-A50998626	palomid-529	MINO	trt_cp	0.01 uM	3 h	2	81	0.2231	0.135932	0	0	1	1	0	AKT inhibitor|FGFR inhibitor|MTOR inhibitor|VEGFR inhibitor	MTOR|FGF2	-0.4775	0.8677	-1.4373
REP.A023_THP1_24H:K16	BRD-K71075609	dorzolamide	THP1	trt_cp	0.37 uM	24 h	2	122	0.1131	0.11878	0	0	1	1	0	Carbonic anhydrase inhibitor	CA2|CA1|CA12|CA14|CA4|CA7	-0.4774	0.8677	-1.4371
REP.B014_PC3_24H:E24	BRD-A59174698	ritodrine	PC3	trt_cp	0.01 uM	24 h	2	282	0.386	0.333617	1	1	1	1	0	Adrenergic receptor agonist	ADRB2	-0.4774	0.8677	-1.4371
CPC017_PHH_24H:BRD-A99177642-001-02-5:10	BRD-A99177642	deltaline	PHH	trt_cp	10 uM	24 h	3	161	0.1	0.128305	0	0	1	1	0	Acetylcholine receptor antagonist	CHRNA7	-0.4773	0.8677	-1.4366
REP.A004_HEK293_24H:O14	BRD-A26503646	formestane	HEK293	trt_cp	3.33 uM	24 h	2	96	0.4447	0.208929	0	0	1	1	0	Aromatase inhibitor	CYP19A1	-0.4772	0.8677	-1.4365
REP.A019_HA1E_24H:C13	BRD-K45330754	BRD-K45330754	HA1E	trt_cp	10 uM	24 h	3	130	0.2399	0.178574	0	0	1	1	0	Estrogen receptor agonist	ESR1|ESR2|ESRRG|ESRRB	-0.4772	0.8677	-1.4365
HOG002_A549_6H:BRD-A79768653-001-02-1:0.013	BRD-A79768653	sirolimus	A549	trt_cp	0.01 uM	6 h	2	190	0.45	0.295674	1	1	1	1	0	MTOR inhibitor	MTOR|FKBP1A|CCR5|FGF2	-0.4772	0.8677	-1.4365
REP.B022_PC3_24H:N19	BRD-A81233518	glycopyrrolate	PC3	trt_cp	2.22 uM	24 h	2	79	0.2603	0.145004	1	1	1	1	0	Acetylcholine receptor antagonist	CHRM3|CHRM1|CHRM2|CHRM4|CHRM5	-0.4772	0.8677	-1.4365
REP.B002_HA1E_24H:M23	BRD-A18043272	phensuximide	HA1E	trt_cp	0.03 uM	24 h	2	63	0.2363	0.123377	1	1	1	1	0	Succinimide antiepileptic	CACNA1G|CACNA1H|CACNA1I	-0.4772	0.8677	-1.4364
CPC018_A549_24H:BRD-K75641298-001-01-5:10	BRD-K75641298	metoclopramide	A549	trt_cp	10 uM	24 h	2	92	0.43	0.201122	0	0	1	1	0	Dopamine receptor antagonist|Serotonin receptor antagonist	DRD2|HTR4|HTR3A|CHRM1|HTR3B	-0.4771	0.8677	-1.4363
REP.A015_MDAMB231_24H:M01	BRD-K59632282	quinidine	MDAMB231	trt_cp	10 uM	24 h	2	119	0.3278	0.199714	1	1	1	1	0	Sodium channel inhibitor	SCN5A|ABCB1|CYP2D6|KCNA5|KCNA7|KCNH1|KCNH2|KCNH5|KCNK1|KCNK6|SLC29A4	-0.4771	0.8677	-1.4362
REP.B011_MDAMB231_24H:B16	BRD-K04111260	raclopride	MDAMB231	trt_cp	0.08 uM	24 h	2	109	0.1463	0.127693	0	0	1	1	0	Dopamine receptor antagonist	DRD2|DRD3|HTR1A	-0.4771	0.8677	-1.4361
CPC006_NOMO1_6H:BRD-K06980535-003-15-0:10	BRD-K06980535	promazine	NOMO1	trt_cp	10 uM	6 h	2	114	0.6	0.264459	0	0	1	1	0	Dopamine receptor antagonist	CHRM5|DRD2|ADRA1A|ADRA1B|ADRA1D|CHRM1|CHRM2|CHRM3|CHRM4|DRD1|DRD3|DRD4|HRH1|HTR2A|HTR2C	-0.477	0.8677	-1.436
REP.A023_HA1E_24H:D03	BRD-A68281735	REV-5901	HA1E	trt_cp	0.12 uM	24 h	3	168	0.1864	0.17894	1	1	1	1	0	Leukotriene receptor antagonist|Lipoxygenase inhibitor	ALOX5	-0.477	0.8677	-1.436
PBIOA015_A375_24H:I05	BRD-K71847383	cytarabine	A375	trt_cp	0.125 uM	24 h	3	385	0.65	0.505845	1	1	1	1	0	Ribonucleoside reductase inhibitor	POLA1|POLB|POLD1|POLE	-0.477	0.8677	-1.4359
REP.B008_MDAMB231_24H:H01	BRD-K69688083	mestinon	MDAMB231	trt_cp	2.22 uM	24 h	2	243	0.5965	0.384981	1	1	1	1	0	Cholinesterase inhibitor	ACHE|BCHE	-0.477	0.8677	-1.4359
CPC014_HEPG2_6H:BRD-K13087974-001-01-7:10	BRD-K13087974	CGP-52411	HEPG2	trt_cp	10 uM	6 h	3	134	0.29	0.199334	0	0	1	1	0	EGFR inhibitor	EGFR	-0.477	0.8677	-1.4358
CPC002_HCC515_24H:BRD-K79684402-300-01-0:10	BRD-K79684402	Ro-10-5824	HCC515	trt_cp	10 uM	24 h	3	188	0.17	0.180773	1	0	1	1	0	Dopamine receptor agonist	DRD4	-0.4769	0.8676	-1.4355
REP.A012_MDAMB231_24H:G07	BRD-A01636364	bupivacaine	MDAMB231	trt_cp	10 uM	24 h	2	115	0.3063	0.189781	0	0	1	1	0	Sodium channel inhibitor	SCN9A|KCNA5|PTGER1|SCN10A|SCN4A	-0.4768	0.8675	-1.4354
MUC.CP008_P1A82_24H:N14	BRD-K12502280	TG-101348	P1A82	trt_cp	3.33 uM	24 h	3	406	0.72	0.546714	1	1	1	1	0	JAK inhibitor|FLT3 inhibitor	JAK2|FLT3|RET|BRD4|JAK1|JAK3|TYK2	-0.4768	0.8669	-1.4353
REP.A028_HELA_24H:H16	BRD-K94293891	suvorexant	HELA	trt_cp	0.37 uM	24 h	3	309	0.3036	0.309714	0	0	1	1	0	Orexin receptor antagonist	HCRTR1|HCRTR2	-0.4768	0.8628	-1.4352
CPC017_MCF7_24H:BRD-A59215453-003-03-3:10	BRD-A59215453	lobelanidine	MCF7	trt_cp	10 uM	24 h	5	305	0.24	0.273581	1	0	1	1	0	Acetylcholine receptor antagonist|Dopamine receptor modulator|Opioid receptor antagonist|Vesicular monoamine transporter inhibitor	OPRM1|SLC18A2	-0.4768	0.8665	-1.4352
CPC004_VCAP_6H:BRD-K70301876-034-06-1:10	BRD-K70301876	escitalopram	VCAP	trt_cp	10 uM	6 h	4	222	0.41	0.30507	1	0	1	1	0	Selective serotonin reuptake inhibitor (SSRI)	SLC6A4|CYP2C19|ADRA1A|CHRM1|HRH1|SLC6A2|SLC6A3	-0.4768	0.862	-1.4351
CPC005_A549_6H:BRD-A19736161-003-03-0:10	BRD-A19736161	ondansetron	A549	trt_cp	10 uM	6 h	3	98	0.22	0.148476	1	0	1	1	0	Serotonin receptor antagonist	HTR3A|CYP2D6|CYP3A5|HTR1A|HTR1B|HTR3B|HTR4|OPRM1	-0.4767	0.8606	-1.435
REP.A005_A549_24H:K19	BRD-K10852020	tolcapone	A549	trt_cp	10 uM	24 h	3	196	0.3352	0.259185	0	0	1	1	0	Catechol O methyltransferase inhibitor	COMT|TTR	-0.4767	0.861	-1.435
REP.B023_MCF10A_24H:I09	BRD-K70505054	ranitidine	MCF10A	trt_cp	0.25 uM	24 h	2	128	0.1278	0.129331	0	0	1	1	0	Histamine receptor antagonist	HRH2|SLC22A2	-0.4766	0.8564	-1.4348
CPC014_PC3_6H:BRD-K85985071-001-20-7:10	BRD-K85985071	ellipticine	PC3	trt_cp	10 uM	6 h	4	319	0.57	0.431185	1	1	1	1	0	Topoisomerase inhibitor	TOP2A|TOP2B	-0.4766	0.856	-1.4347
LKCP002_U2OS_24H:D02	BRD-K99741577	SANT-1	U2OS	trt_cp	1.11 uM	24 h	5	163	0.2814	0.216564	1	1	1	1	0	Smoothened receptor antagonist	SMO|DHH|IHH|PTCH1|SHH	-0.4765	0.856	-1.4345
CPC005_MCF7_6H:J03	BRD-K53263234	CITCO	MCF7	trt_cp	10 uM	6 h	4	114	0.2081	0.155747	1	0	1	1	0	CAR agonist	NR1I3	-0.4766	0.856	-1.4345
CPC018_HT29_6H:BRD-K36055864-001-09-3:10	BRD-K36055864	cycloheximide	HT29	trt_cp	10 uM	6 h	5	537	0.74	0.637432	1	1	1	1	0	Protein synthesis inhibitor	GSK3B|RPL3	-0.4765	0.8559	-1.4344
MOAR003_A375_24H:D22	BRD-K20372197	droxidopa	A375	trt_cp	10 uM	24 h	3	195	0.23	0.214147	0	0	1	1	0	Norepinephrine inhibitor	ADRA1A|ADRA1B|ADRA1D|ADRA2A|ADRA2B|ADRA2C|ADRB1|ADRB2|ADRB3|PAH	-0.4765	0.8556	-1.4343
AICHI002_OCILY19_24H:N13	BRD-K60866521	idelalisib	OCILY19	trt_cp	10 uM	24 h	3	150	0.42	0.253805	1	1	1	1	0	PI3K inhibitor	PIK3CD|PIK3CG|CCL3|CCL4|PIK3CA|PIK3CB	-0.4764	0.8546	-1.4342
AICHI002_THP1_24H:J19	BRD-K79404599	enzastaurin	THP1	trt_cp	10 uM	24 h	3	243	0.4631	0.339212	1	1	1	1	0	PKC inhibitor	PRKCB|AKT1|GSK3B|PRKCA|PRKCD|PRKCG	-0.4764	0.854	-1.4341
REP.B017_YAPC_24H:N19	BRD-A63236097	BRD-A63236097	YAPC	trt_cp	2.22 uM	24 h	2	120	0.3729	0.213903	1	1	1	1	0	Tumor necrosis factor production inhibitor	NFKB1	-0.4764	0.854	-1.434
LJP002_MDAMB231_24H:BRD-K12502280-001-03-1:10	BRD-K12502280	TG-101348	MDAMB231	trt_cp	10 uM	24 h	3	498	0.67	0.584094	0	0	1	1	0	JAK inhibitor|FLT3 inhibitor	JAK2|FLT3|RET|BRD4|JAK1|JAK3|TYK2	-0.4764	0.854	-1.434
REP.B017_HEK293_24H:F17	BRD-K62858456	lomerizine	HEK293	trt_cp	0.03 uM	24 h	2	58	0.2886	0.130826	1	1	1	1	0	Calcium channel blocker	ABCB1|CACNA1B|SCN5A	-0.4763	0.854	-1.4339
POL001_HT29_24H:H19	BRD-K36737713	AG-957	HT29	trt_cp	10 uM	24 h	3	114	0.21	0.156456	1	1	1	1	0	Protein tyrosine kinase inhibitor	ABL1|EGFR	-0.4763	0.854	-1.4338
REP.A025_YAPC_24H:H20	BRD-A74391928	ibutilide	YAPC	trt_cp	3.33 uM	24 h	3	173	0.4043	0.267427	1	1	1	1	0	Potassium channel antagonist	KCNH2|CACNA1C|SCN5A|CACNA2D1|CACNB1|CACNG1|KCNH6|KCNH7|KCNJ11|KCNK1|KCNK6	-0.4763	0.854	-1.4337
CPC018_SKB_24H:BRD-K08640512-003-01-5:10	BRD-K08640512	RS-100329	SKB	trt_cp	10 uM	24 h	3	192	0.08	0.125322	0	0	1	1	0	Adrenergic receptor antagonist	ADRA1A|ADRA1D	-0.4763	0.854	-1.4337
REP.A026_A375_24H:K19	BRD-K92049597	triamterene	A375	trt_cp	10 uM	24 h	3	505	0.5905	0.552187	0	0	1	1	0	Sodium channel inhibitor	SCNN1A|SCNN1B|SCNN1G|SCNN1D	-0.4762	0.854	-1.4335
CPC018_MCF7_6H:BRD-K00234327-001-01-4:10	BRD-K00234327	RU-24969	MCF7	trt_cp	10 uM	6 h	3	141	0.3	0.20797	1	1	1	1	0	Serotonin receptor agonist	HTR1A|HTR1B|HTR6|HTR1D|HTR2A|HTR2B|HTR2C|HTR5A	-0.4761	0.854	-1.4333
CPC012_SKB_24H:BRD-K07403598-001-01-0:10	BRD-K07403598	CAY-10470	SKB	trt_cp	10 uM	24 h	3	147	0.18	0.164485	0	0	1	1	0	NFKB inhibitor	NFKB1|TNF	-0.476	0.854	-1.433
CPC002_HCC515_24H:BRD-K82823076-001-01-8:10	BRD-K82823076	Ro-15-4513	HCC515	trt_cp	10 uM	24 h	3	76	0.23	0.133691	1	0	1	1	0	GABA receptor agonist	GABRA1|GABRA2|GABRA3|GABRA5|GABRA4|GABRA6|GABRB2|GABRG2	-0.476	0.854	-1.4329
REP.A021_HA1E_24H:L11	BRD-K84783599	riociguat	HA1E	trt_cp	0.125 uM	24 h	3	126	0.2189	0.167934	1	0	1	1	0	Guanylate cyclase activator	GUCY1A3|GUCY1B3|GUCY1A2|GUCY1B2	-0.476	0.8539	-1.4328
REP.A011_HEK293_24H:A23	BRD-K04112579	nepafenac	HEK293	trt_cp	0.125 uM	24 h	2	127	0.2871	0.193085	0	0	1	1	0	Cyclooxygenase inhibitor	PTGS2|PTGS1	-0.4759	0.8531	-1.4326
CPC017_PHH_24H:BRD-A92537424-001-03-9:10	BRD-A92537424	danazol	PHH	trt_cp	10 uM	24 h	3	57	0.07	0.063873	0	0	1	1	0	Estrogen receptor antagonist|Progesterone receptor agonist	GNRHR|ESR1|CYP2C8|TNF|AR|CCL2|GNRHR2|PGR	-0.4759	0.8506	-1.4325
PAC002_U2OS_6H:BRD-K52721684-001-02-2:16.7045	BRD-K52721684	PCO-400	U2OS	trt_cp	15 uM	6 h	2	65	0.18	0.109376	0	0	1	1	0	Potassium channel activator	KCNJ8|ABCC9	-0.4758	0.8503	-1.4324
REP.A015_MDAMB231_24H:N17	BRD-K60160658	tiagabine	MDAMB231	trt_cp	0.125 uM	24 h	2	29	0.2385	0.0840957	1	1	1	1	0	GABA receptor antagonist	SLC6A1|CYP2C19	-0.4758	0.8503	-1.4323
CPC014_PHH_24H:BRD-K14880289-001-01-4:10	BRD-K14880289	GW-501516	PHH	trt_cp	10 uM	24 h	4	164	0.32	0.231647	0	0	1	1	0	PPAR receptor agonist|Insulin sensitizer	PPARD|INS|PPARA	-0.4757	0.8503	-1.4321
AICHI001_KMS34_24H:J07	BRD-K76719364	GS-9973	KMS34	trt_cp	10 uM	24 h	3	80	0.29	0.154019	1	1	1	1	0	Syk inhibitor	SYK	-0.4757	0.8503	-1.432
REP.B023_A549_24H:A18	BRD-K67966701	lisinopril	A549	trt_cp	0.01 uM	24 h	2	130	0.1451	0.138879	1	0	1	1	0	ACE inhibitor	ACE|ACE2	-0.4757	0.8503	-1.4319
REP.A025_HA1E_24H:A24	BRD-K98493452	honokiol	HA1E	trt_cp	0.04 uM	24 h	3	144	0.2668	0.1982	1	1	1	1	0	AKT inhibitor	ALOX5|PTGS1|PTGS2	-0.4756	0.8503	-1.4316
REP.A023_MDAMB231_24H:I12	BRD-K70505054	ranitidine	MDAMB231	trt_cp	0.04 uM	24 h	2	108	0.4177	0.214771	1	1	1	1	0	Histamine receptor antagonist	HRH2|SLC22A2	-0.4755	0.8503	-1.4315
CPC011_A549_24H:BRD-K82357231-001-11-8:10	BRD-K82357231	desloratadine	A549	trt_cp	10 uM	24 h	3	142	0.27	0.197996	1	1	1	1	0	Histamine receptor antagonist	HRH1	-0.4755	0.8503	-1.4313
CPC010_A549_24H:BRD-A46179541-003-02-3:10	BRD-A46179541	doxapram	A549	trt_cp	10 uM	24 h	2	47	0.17	0.0903866	0	0	1	1	0	Potassium channel antagonist	KCNK3|KCNK9	-0.4754	0.8503	-1.431
REP.A010_MCF10A_24H:P17	BRD-K15409150	penfluridol	MCF10A	trt_cp	0.125 uM	24 h	2	167	0.4299	0.27094	1	1	1	1	0	Calcium channel blocker	DRD1|DRD2|CACNA1G	-0.4753	0.8503	-1.4308
REP.A024_HELA_24H:B24	BRD-K73794685	azithromycin	HELA	trt_cp	0.04 uM	24 h	3	187	0.3532	0.259873	1	1	1	1	0	Bacterial 50S ribosomal subunit inhibitor	MLNR	-0.4753	0.8503	-1.4307
LJP009_HEK293_24H:H07	BRD-K09951645	dabrafenib	HEK293	trt_cp	10 uM	24 h	3	123	0.3029	0.195179	1	1	1	1	0	RAF inhibitor	BRAF|CYP2B6|CYP2C19|CYP2C8|CYP3A4|LIMK1|NEK11|RAF1|SIK1	-0.4753	0.8503	-1.4307
CPC015_SKB_24H:BRD-A89175223-051-05-6:10	BRD-A89175223	bisoprolol	SKB	trt_cp	10 uM	24 h	2	66	0.06	0.0636324	0	0	1	1	0	Adrenergic receptor antagonist	ADRB1|ADRB2	-0.4752	0.8502	-1.4305
PAC003_U2OS_6H:BRD-K21450440-001-04-7:10	BRD-K21450440	benzthiazide	U2OS	trt_cp	10 uM	6 h	2	42	0.09	0.0621694	1	0	1	1	0	Carbonic anhydrase inhibitor	CA2|SLC12A3|CA1|CA12|CA4|CA9	-0.4752	0.8499	-1.4303
REP.A022_HA1E_24H:O19	BRD-K82677201	almitrine	HA1E	trt_cp	10 uM	24 h	2	71	0.3377	0.156576	1	1	1	1	0	Neurotransmitter agonist	ATP1A1	-0.4751	0.847	-1.4301
REP.B020_HT29_24H:L09	BRD-K45924332	amrinone	HT29	trt_cp	0.25 uM	24 h	2	46	0.132	0.0787946	1	0	1	1	0	Phosphodiesterase inhibitor	PDE3A|PDE3B|PDE4B|TNF	-0.475	0.847	-1.43
REP.A003_A549_24H:B08	BRD-K31135544	IB-MECA	A549	trt_cp	3.33 uM	24 h	3	97	0.0586	0.0762369	0	0	1	1	0	Adenosine receptor agonist	ADORA3|ADORA1|ADORA2A|ADORA2B	-0.4751	0.847	-1.43
PBIOA015_HCC515_24H:O07	BRD-K08547377	irinotecan	HCC515	trt_cp	10 uM	24 h	3	626	0.7912	0.711641	1	1	1	1	0	Topoisomerase inhibitor	TOP1|CYP3A5|TOP1MT	-0.475	0.847	-1.4299
CPC017_MCF7_6H:BRD-K54708045-001-01-3:10	BRD-K54708045	nTZDpa	MCF7	trt_cp	10 uM	6 h	4	359	0.32	0.342731	1	0	1	1	0	PPAR receptor agonist	PPARG	-0.475	0.847	-1.4298
REP.B024_HEK293_24H:M16	BRD-K78567475	dolastatin-10	HEK293	trt_cp	0.08 uM	24 h	2	330	0.5349	0.424838	0	0	1	1	0	Tubulin inhibitor|Immunostimulant	TUBB	-0.475	0.847	-1.4298
ISO002_MCF10A.KRAS.HG_24H:H14	BRD-K30466858	ellagic-acid	MCF10A	trt_cp	3.33 uM	24 h	3	189	0.6275	0.348232	1	1	1	1	0	Glutathione transferase inhibitor|Aldose reductase inhibitor|Beta secretase inhibitor|HCV inhibitor|HIV inhibitor|Quorum sensing signaling modulator|Reverse transcriptase inhibitor	CA1|CA12|CA14|CA2|CA4|CA6|CA9|SYK|AKR1B1|BACE1|CA3|CA5A|CA5B|CA7|CSNK2A1|GSK3B|PRKACA|PRKCA|PRKCB|SQLE	-0.4749	0.847	-1.4297
REP.A019_A549_24H:L20	BRD-A49399758	desmopressin-acetate	A549	trt_cp	3.33 uM	24 h	2	137	0.2719	0.195162	0	0	1	1	0	Vasopressin receptor agonist	AVPR2|AVPR1A|AVPR1B|OXTR	-0.475	0.847	-1.4297
REP.A001_HELA_24H:K13	BRD-A29289453	PCA-4248	HELA	trt_cp	10 uM	24 h	3	112	0.173	0.140755	1	1	1	1	0	Platelet activating factor receptor antagonist	PTAFR	-0.4749	0.8469	-1.4296
REP.A002_A549_24H:H24	BRD-A16997652	protirelin	A549	trt_cp	0.04 uM	24 h	2	277	0.1194	0.183896	0	0	1	1	0	Thyrotropin releasing hormone receptor agonist	TRHR	-0.4749	0.8469	-1.4296
REP.A013_MCF10A_24H:B24	BRD-K37590257	GSK-256066	MCF10A	trt_cp	0.04 uM	24 h	3	236	0.3188	0.277361	1	1	1	1	0	Phosphodiesterase inhibitor	PDE4A|PDE4B|PDE4C|PDE4D	-0.4749	0.8456	-1.4294
CPC015_HEPG2_6H:BRD-A01320529-001-05-9:10	BRD-A01320529	salmeterol	HEPG2	trt_cp	10 uM	6 h	2	129	0.32	0.205447	0	0	1	1	0	Adrenergic receptor agonist	ADRB2	-0.4749	0.8459	-1.4294
CPC018_PHH_24H:BRD-K51677086-001-07-0:10	BRD-K51677086	erythromycin-ethylsuccinate	PHH	trt_cp	10 uM	24 h	3	93	0.06	0.0755349	0	0	1	1	0	Cytochrome P450 inhibitor|Motilin receptor agonist|NFKB inhibitor|Protein synthesis inhibitor	CYP3A4|MLNR|ABCB1|ALB|CYP51A1|KCNH2|SLC47A1	-0.4747	0.8426	-1.429
CPD003_PC3_24H:BRD-A54490543-066-08-5:10	BRD-A54490543	pirlindole	PC3	trt_cp	10 uM	24 h	2	102	0.26	0.164671	0	0	1	1	0	Monoamine oxidase inhibitor	MAOA|SLC6A2|SLC6A4	-0.4747	0.8428	-1.429
REP.A006_HELA_24H:G24	BRD-K21071223	VP-20629	HELA	trt_cp	0.04 uM	24 h	3	172	0.2962	0.228238	1	0	1	1	0	Beta amyloid inhibitor	APP|PLA2G2E|SLC36A1	-0.4746	0.8425	-1.4286
NMH002_NPC_24H:BRD-A13946108-001-13-0:10	BRD-A13946108	sulindac	NPC	trt_cp	10 uM	24 h	3	34	0.12	0.0645893	1	0	1	1	0	Cyclooxygenase inhibitor	PTGS1|PTGS2|AKR1B1|MAPK3|PPARD|PTGDR2	-0.4745	0.8425	-1.4285
CPC005_A375_24H:BRD-K02867583-300-06-3:10	BRD-K02867583	minaprine	A375	trt_cp	10 uM	24 h	3	109	0.33	0.191779	1	1	1	1	0	Serotonin receptor antagonist	SLC6A4|HTR2B|ACHE|CHRM1|DRD1|DRD2|HTR2A|HTR2C|MAOA	-0.4745	0.8425	-1.4284
REP.B017_HELA_24H:K02	BRD-K65991129	SB-705498	HELA	trt_cp	0.74 uM	24 h	2	99	0.3459	0.187121	1	1	1	1	0	TRPV antagonist	TRPV1	-0.4745	0.8424	-1.4283
CPC016_HT29_6H:BRD-K53523901-001-02-8:10	BRD-K53523901	arctigenin	HT29	trt_cp	10 uM	6 h	5	154	0.14	0.148476	1	0	1	1	0	MEK inhibitor	ADIPOR1|AHR|CHUK|MAP2K1	-0.4745	0.8425	-1.4283
CPC003_HCC515_6H:BRD-A32349859-001-02-8:10	BRD-A32349859	methyl-angolensate	HCC515	trt_cp	10 uM	6 h	3	149	0.12	0.135212	1	0	1	1	0	Apoptosis inhibitor	HTR2B	-0.4744	0.8423	-1.428
CPC014_PC3_24H:BRD-K79437791-001-03-2:10	BRD-K79437791	BRD-K79437791	PC3	trt_cp	10 uM	24 h	5	93	0.23	0.147889	1	0	1	1	0	Inhibitor of methylation of endogenous isoprenylated proteins	PPARG	-0.4744	0.8423	-1.4279
CPC009_A375_6H:BRD-A57457122-001-01-2:10	BRD-A57457122	VU-0400071-3	A375	trt_cp	10 uM	6 h	4	120	0.18	0.148613	1	0	1	1	0	Glutamate receptor antagonist	GRM4	-0.4743	0.8423	-1.4278
CPC016_NEU_24H:BRD-K95609758-001-01-1:10	BRD-K95609758	BMS-191011	NEU	trt_cp	10 uM	24 h	3	96	0.25	0.156652	0	0	1	1	0	Potassium channel activator	KCNMA1	-0.4742	0.8423	-1.4275
CPC011_A375_6H:BRD-A01787639-001-03-1:10	BRD-A01787639	naftopidil	A375	trt_cp	10 uM	6 h	3	37	0.43	0.127546	1	1	1	1	0	Adrenergic receptor antagonist	ADRA1D|ADRA1A	-0.4742	0.8423	-1.4274
CPC004_HCC515_24H:BRD-K70301876-034-06-1:10	BRD-K70301876	escitalopram	HCC515	trt_cp	10 uM	24 h	3	120	0.44	0.232353	1	1	1	1	0	Selective serotonin reuptake inhibitor (SSRI)	SLC6A4|CYP2C19|ADRA1A|CHRM1|HRH1|SLC6A2|SLC6A3	-0.4742	0.8423	-1.4274
CRCGN012_HEPG2_24H:BRD-K43880410:21.2565	BRD-K43880410	pregnenolone	HEPG2	trt_cp	20 uM	24 h	3	165	0.14	0.153687	0	0	1	1	0	Glutamate receptor antagonist	PGR|CYP17A1|SULT2B1	-0.4741	0.8423	-1.4273
REP.B026_HELA_24H:I12	BRD-K91159026	telcagepant	HELA	trt_cp	0.01 uM	24 h	2	73	0.1137	0.0921239	1	0	1	1	0	Calcitonin antagonist	CALCRL|RAMP1|CALCA	-0.4741	0.8423	-1.4273
REP.B019_THP1_24H:N24	BRD-K50031829	PF-04447943	THP1	trt_cp	0.01 uM	24 h	2	138	0.1484	0.144706	1	1	1	1	0	Phosphodiesterase inhibitor	PDE9A	-0.4741	0.8423	-1.4272
REP.A010_MCF7_24H:G07	BRD-K13183738	pentamidine	MCF7	trt_cp	10 uM	24 h	3	239	0.5933	0.380773	0	0	1	1	0	Anti-pneumocystis agent	TRDMT1	-0.474	0.8423	-1.4269
REP.A023_YAPC_24H:D16	BRD-A68464583	mazindol	YAPC	trt_cp	0.37 uM	24 h	2	41	0.283	0.108922	1	1	1	1	0	Dopamine receptor antagonist|Serotonin reuptake inhibitor	SLC6A3|SLC6A4|SLC6A2	-0.4739	0.8423	-1.4267
REP.A028_HELA_24H:J21	BRD-K95739795	tetrabenazine	HELA	trt_cp	1.11 uM	24 h	3	186	0.3291	0.250179	1	0	1	1	0	Vesicular monoamine transporter inhibitor	SLC18A2|DRD2|SLC18A1	-0.474	0.8423	-1.4267
CPC004_HA1E_24H:BRD-A29426959-050-07-4:10	BRD-A29426959	carbinoxamine	HA1E	trt_cp	10 uM	24 h	3	135	0.38	0.229028	1	1	1	1	0	Histamine receptor antagonist|Calcium channel blocker	HRH1	-0.474	0.8423	-1.4267
REP.B018_HEK293_24H:E17	BRD-A63310107	miglitol	HEK293	trt_cp	0.03 uM	24 h	2	73	0.049	0.060477	0	0	1	1	0	Glucosidase inhibitor	GAA|MGAM|SLC5A4|GANAB|GANC	-0.4739	0.8423	-1.4266
PBIOA015_HCC515_24H:E13	BRD-K54330070	SB-202190	HCC515	trt_cp	10 uM	24 h	3	264	0.168	0.212955	1	1	1	1	0	P38 MAPK inhibitor	MAPK14|AKT1|ALOX5|CHEK1|GSK3B|LCK|MAPK1|MAPK11|MAPK12|MAPK8|PRKCA|ROCK1|RPS6KB1|SGK1	-0.4739	0.8423	-1.4266
PAC004_U2OS_6H:BRD-K05181463-001-01-6:10	BRD-K05181463	L-741626	U2OS	trt_cp	10 uM	6 h	2	26	0.35	0.0964609	1	1	1	1	0	Dopamine receptor antagonist	DRD2	-0.4738	0.8423	-1.4262
CPC008_HEPG2_6H:BRD-A12633378-001-05-4:10	BRD-A12633378	ML-213	HEPG2	trt_cp	10 uM	6 h	3	94	0.09	0.093007	1	0	1	1	0	Potassium channel activator	KCNQ4|KCNQ2	-0.4738	0.8423	-1.4262
REP.A025_PC3_24H:G11	BRD-K73815512	HC-030031	PC3	trt_cp	0.125 uM	24 h	2	83	0.298	0.15903	1	1	1	1	0	TRPA1 channel blocker	TRPA1	-0.4737	0.8423	-1.4261
CPC007_HCC515_6H:BRD-K40213712-001-05-4:10	BRD-K40213712	SAL-1	HCC515	trt_cp	10 uM	6 h	2	83	0.12	0.100916	1	1	1	1	0	Adenosine receptor antagonist	ADORA2B	-0.4738	0.8423	-1.4261
CPC001_VCAP_24H:F02	BRD-A71262238	nafadotride	VCAP	trt_cp	10 uM	24 h	5	171	0.2749	0.219238	0	0	1	1	0	Dopamine receptor antagonist	DRD3|DRD2|HTR1A	-0.4737	0.8423	-1.426
CPC002_HA1E_24H:BRD-K91263825-001-03-6:10	BRD-K91263825	nortriptyline	HA1E	trt_cp	10 uM	24 h	3	215	0.51	0.334838	1	1	1	1	0	Tricyclic antidepressant	KCNJ10|SLC6A2|SLC6A4|CYP2C19|PIK3CD|ADRA1A|ADRA1B|ADRA1D|ADRA2A|ADRA2B|ADRA2C|ADRB1|ADRB2|ADRB3|CHRM1|CHRM2|CHRM3|CHRM4|CHRM5|DRD2|HRH1|HTR1A|HTR2A|HTR2C|HTR6|PGRMC1|SIGMAR1	-0.4737	0.8423	-1.4259
REP.A020_YAPC_24H:P15	BRD-K49504902	SEP-227900	YAPC	trt_cp	1.11 uM	24 h	3	91	0.1165	0.104115	1	0	1	1	0	D-Amino Acid Oxidase Inhibitor	DAO	-0.4737	0.8423	-1.4258
CPC018_SKB_24H:BRD-K96084870-001-01-9:10	BRD-K96084870	DMBI	SKB	trt_cp	10 uM	24 h	3	486	0.31	0.392491	0	0	1	1	0	PDGFR inhibitor|VEGFR inhibitor	PDGFRB	-0.4736	0.8423	-1.4257
REP.B004_HELA_3H:M13	BRD-K24968862	SB-683698	HELA	trt_cp	2.22 uM	3 h	3	124	0.2465	0.176787	1	1	1	1	0	Integrin inhibitor	ITGA4|ITGAV|ITGB1|ITGB7	-0.4736	0.8423	-1.4257
REP.B009_MCF10A_24H:L08	BRD-K32218650	MBX-2982	MCF10A	trt_cp	0.74 uM	24 h	2	57	0.2294	0.115628	1	1	1	1	0	Glucose dependent insulinotropic receptor agonist	GPR119	-0.4736	0.8423	-1.4256
REP.A028_HELA_24H:M19	BRD-K97010173	deferasirox	HELA	trt_cp	10 uM	24 h	3	195	0.4378	0.295451	1	1	1	1	0	Chelating agent	CYP2C19|CYP2C8|CYP3A4	-0.4735	0.8423	-1.4253
REP.B026_HELA_24H:E13	BRD-K89208535	indacaterol	HELA	trt_cp	2.22 uM	24 h	2	67	0.0861	0.0768015	1	1	1	1	0	Adrenergic receptor agonist	ADRB2|ADRB1	-0.4734	0.8423	-1.4252
CPC013_HT29_6H:C05	BRD-K15600710	obatoclax	HT29	trt_cp	10 uM	6 h	5	241	0.4226	0.322704	1	1	1	1	0	BCL inhibitor	BCL2|BCL2L1|MCL1	-0.4734	0.8423	-1.4252
REP.A024_HT29_24H:H08	BRD-K75911534	SU-014813	HT29	trt_cp	3.33 uM	24 h	3	181	0.3206	0.243586	1	1	1	1	0	PDGFR inhibitor|VEGFR inhibitor	KDR|FLT3|PDGFRA|PDGFRB	-0.4735	0.8423	-1.4252
REP.A020_HUVEC.A_24H:C17	BRD-K84925803	T-5224	HUVEC	trt_cp	0.125 uM	24 h	3	93	0.0906	0.0928188	0	0	1	1	0	AP inhibitor	JUN	-0.4735	0.8423	-1.4252
LRS001_PHH.MGH_24H:O07	BRD-K00317371	RITA	PHH	trt_cp	10 uM	24 h	3	127	0.59	0.276795	1	1	1	1	0	MDM inhibitor	MDM2|TXNRD1|TXNRD2	-0.4734	0.8423	-1.4251
PCL001_HEPG2_24H:BRD-K39841531:10	BRD-K39841531	TG-101209	HEPG2	trt_cp	10 uM	24 h	3	410	0.69	0.537833	1	1	1	1	0	JAK inhibitor	JAK2|JAK3	-0.4733	0.8423	-1.4246
EMU001_TMD8_6H:E13	BRD-A30984645	GDC-0834	TMD8	trt_cp	10 uM	6 h	3	105	0.3365	0.190072	0	0	1	1	0	BTK inhibitor	BTK	-0.4732	0.8423	-1.4245
REP.B004_A549_24H:O09	BRD-A26384407	chlortalidone	A549	trt_cp	0.25 uM	24 h	2	202	0.3612	0.273137	0	0	1	1	0	Carbonic anhydrase inhibitor	CA7|CA1|CA12|CA14|CA4|SLC12A1|SLC12A3	-0.4732	0.8423	-1.4244
REP.B023_HUVEC.A_24H:E15	BRD-A68942014	amitifadine	HUVEC	trt_cp	0.25 uM	24 h	2	85	0.0686	0.0772151	0	0	1	1	0	Serotonin receptor antagonist	SLC6A2|SLC6A3|SLC6A4	-0.4732	0.8423	-1.4243
CPC016_ASC_24H:BRD-K17868609-001-02-7:10	BRD-K17868609	BRL-54443	ASC	trt_cp	10 uM	24 h	3	64	0.19	0.111506	1	0	1	1	0	Serotonin receptor agonist	HTR1E|HTR1F	-0.4731	0.8423	-1.424
CPC017_SKB_24H:BRD-K34441861-003-01-3:10	BRD-K34441861	moexipril	SKB	trt_cp	10 uM	24 h	2	186	0.34	0.254288	0	0	1	1	0	ACE inhibitor	ACE|ACE2	-0.4731	0.8423	-1.424
CPC016_NEU_24H:BRD-K62736196-015-03-7:10	BRD-K62736196	guanaben-acetate	NEU	trt_cp	10 uM	24 h	3	191	0.26	0.225338	0	0	1	1	0	Adrenergic receptor agonist	ADRA2A|ADRA2B|ADRA2C	-0.473	0.8423	-1.4239
CPC003_HCC515_24H:BRD-K01815685-001-07-2:10	BRD-K01815685	BRD-K01815685	HCC515	trt_cp	10 uM	24 h	3	83	0.26	0.148544	1	1	1	1	0	Aryl hydrocarbon receptor agonist|Indoleamine 2,3-dioxygenase inhibitor	AHR|IDO1	-0.4729	0.8423	-1.4237
CPC006_A375_24H:BRD-K92980438-001-01-7:160	BRD-K92980438	BRD-K92980438	A375	trt_cp	150 uM	24 h	5	162	0.2	0.182013	1	0	1	1	0	Hexokinase inhibitor	HK2	-0.473	0.8423	-1.4237
REP.A008_PC3_24H:C14	BRD-K31928526	barasertib	PC3	trt_cp	3.33 uM	24 h	2	74	0.1361	0.101479	0	0	1	1	0	Aurora kinase inhibitor	AURKB|AURKA	-0.4729	0.8423	-1.4235
CPC014_PHH_24H:BRD-K22429181-001-08-4:10	BRD-K22429181	retinol	PHH	trt_cp	10 uM	24 h	4	247	0.3	0.275258	0	0	1	1	0	Retinoid receptor agonist	ALDH1A1|ALDH1A2|ALDH1A3|DHRS3|DHRS4|LRAT|NR2C2|RBP1|RBP3|RDH11|RDH12|RDH13|RDH14|RDH5|RDH8|RETSAT|RHO|RLBP1|RXRA|RXRB|RXRG	-0.4729	0.8423	-1.4235
REP.A017_HELA_24H:J08	BRD-K64931368	aminocaproic-acid	HELA	trt_cp	3.33 uM	24 h	3	106	0.157	0.130447	1	0	1	1	0	Plasminogen activator inhibitor	PLG|PLAT|LPA	-0.4729	0.8423	-1.4235
REP.A017_MDAMB231_24H:F06	BRD-K62363391	dapsone	MDAMB231	trt_cp	0.04 uM	24 h	3	119	0.2657	0.179804	0	0	1	1	0	Bacterial antifolate	DHFR	-0.4729	0.8423	-1.4234
REP.B005_YAPC_24H:E19	BRD-K09078998	deforolimus	YAPC	trt_cp	2.22 uM	24 h	2	174	0.3742	0.258022	0	0	1	1	0	MTOR inhibitor	MTOR	-0.4728	0.8423	-1.4233
CPC017_A549_24H:BRD-K81225797-001-01-5:10	BRD-K81225797	SCH-58261	A549	trt_cp	10 uM	24 h	3	104	0.26	0.166278	1	1	1	1	0	Adenosine receptor antagonist	ADORA2A|ADORA1|ADORA2B|ADORA3	-0.4727	0.8423	-1.423
REP.A025_YAPC_24H:K17	BRD-A82522119	tibolone	YAPC	trt_cp	0.125 uM	24 h	3	187	0.3818	0.27019	1	1	1	1	0	Estrogen receptor agonist|Androgen receptor agonist|Progesterone receptor agonist	ESR1|AR|PGR|STS	-0.4727	0.8423	-1.423
CPD003_MCF7_6H:BRD-K68804560-066-01-2:10	BRD-K68804560	benzatropine	MCF7	trt_cp	10 uM	6 h	2	184	0.33	0.24917	0	0	1	1	0	Acetylcholine receptor antagonist	CHRM1	-0.4727	0.8423	-1.4229
CPC013_NPC_24H:BRD-K45044657-001-01-4:10	BRD-K45044657	TC-H-106	NPC	trt_cp	10 uM	24 h	3	101	0.22	0.150731	0	0	1	1	0	HDAC inhibitor	HDAC1|HDAC2|HDAC3|HDAC8	-0.4727	0.8423	-1.4229
PBIOA019_HA1E_24H:M02	BRD-K09951645	dabrafenib	HA1E	trt_cp	3.33 uM	24 h	3	194	0.32	0.251945	1	1	1	1	0	RAF inhibitor	BRAF|CYP2B6|CYP2C19|CYP2C8|CYP3A4|LIMK1|NEK11|RAF1|SIK1	-0.4726	0.8423	-1.4227
MOAR007_PC3_24H:A13	BRD-K16508793	diazepam	PC3	trt_cp	10 uM	24 h	3	166	0.27	0.214075	1	1	1	1	0	Benzodiazepine receptor agonist	GABRA1|GABRA2|GABRA3|GABRA5|GABRA4|GABRA6|GABRB1|GABRB2|GABRB3|GABRD|GABRE|GABRG1|GABRG2|GABRG3|GABRP|GABRQ|CYP2C19|ADRA1A|GABRR1|GABRR2|GABRR3|TSPO	-0.4726	0.8423	-1.4226
CPC003_HCC515_24H:BRD-K08640512-003-01-5:10	BRD-K08640512	RS-100329	HCC515	trt_cp	10 uM	24 h	3	61	0.06	0.0611746	1	0	1	1	0	Adrenergic receptor antagonist	ADRA1A|ADRA1D	-0.4725	0.8423	-1.4224
AICHI002_TMD8_24H:L14	BRD-K78431006	crizotinib	TMD8	trt_cp	2.5 uM	24 h	3	98	0.41	0.202692	1	1	1	1	0	ALK inhibitor	ALK|MET|CYP2B6|CYP3A5|MST1R|ROS1	-0.4724	0.8423	-1.4221
LJP008_HUVEC_24H:D13	BRD-K98251413	IOX2	HUVEC	trt_cp	10 uM	24 h	3	142	0.3057	0.21068	1	1	1	1	0	HIF Inhibitor	EGLN1|KDM2A|KDM5C	-0.4723	0.8405	-1.4218
CPC013_PC3_6H:BRD-K45044657-001-01-4:10	BRD-K45044657	TC-H-106	PC3	trt_cp	10 uM	6 h	5	152	0.15	0.152686	1	0	1	1	0	HDAC inhibitor	HDAC1|HDAC2|HDAC3|HDAC8	-0.4723	0.8405	-1.4218
REP.B015_MDAMB231_24H:E16	BRD-K56957086	dacinostat	MDAMB231	trt_cp	0.08 uM	24 h	2	373	0.5915	0.474966	0	0	1	1	0	HDAC inhibitor	HDAC1|HDAC2|HDAC3|HDAC4|HDAC5|HDAC6|HDAC7|HDAC8|HDAC9	-0.4723	0.8412	-1.4218
CPC004_VCAP_24H:B07	BRD-K38323065	phenacetin	VCAP	trt_cp	10 uM	24 h	6	393	0.13	0.228559	0	0	1	1	0	Cyclooxygenase inhibitor	PTGS1	-0.4722	0.8403	-1.4216
CPC015_A375_6H:BRD-K28183345-003-07-2:10	BRD-K28183345	proguanil	A375	trt_cp	10 uM	6 h	3	198	0.4	0.284573	1	1	1	1	0	Dihydrofolate reductase inhibitor	CYP2C19|DHFR	-0.4722	0.8403	-1.4215
CPC006_NCIH508_6H:BRD-K15563106-001-08-1:177.6	BRD-K15563106	phloretin	NCIH508	trt_cp	200 uM	6 h	2	40	0.45	0.135665	1	1	1	1	0	Sodium channel inhibitor	AQP9|CLCN3|SLC23A1	-0.4722	0.8403	-1.4213
CPC011_PC3_24H:BRD-A49172652-001-23-0:10	BRD-A49172652	lansoprazole	PC3	trt_cp	10 uM	24 h	4	295	0.09	0.164764	1	0	1	1	0	Proton pump inhibitor	ATP4A|CYP2C19|CYP3A4|CYP3A5|ATP4B	-0.4721	0.8403	-1.4211
CPC006_U937_6H:BRD-K47983010-001-02-1:10	BRD-K47983010	BX-795	U937	trt_cp	10 uM	6 h	2	295	0.49	0.38445	1	1	1	1	0	IKK inhibitor	PDPK1|IKBKE|TBK1|CDK2|CHEK1|GSK3B|KDR|PDK1	-0.4721	0.8403	-1.421
REP.A012_A549_24H:J08	BRD-K02123250	JNJ-38877605	A549	trt_cp	3.33 uM	24 h	3	142	0.2623	0.195152	0	0	1	1	0	MET inhibitor	MET	-0.472	0.8403	-1.4209
CPD002_MCF7_24H:BRD-K71696703-001-04-6:10	BRD-K71696703	triflusal	MCF7	trt_cp	10 uM	24 h	3	91	0.25	0.152518	1	0	1	1	0	Cyclooxygenase inhibitor|Platelet aggregation inhibitor|Thromboxane synthase inhibitor	PTGS1|PDE4A|PDE4B|PDE4C|PDE4D|PTGS2|NFKB1|NOS2|PDE10A	-0.4718	0.8403	-1.4204
REP.A015_JURKAT_24H:N22	BRD-K60240222	carglumic-acid	JURKAT	trt_cp	0.37 uM	24 h	2	181	0.2048	0.194686	1	1	1	1	0	Carbamoyl phosphate synthase activator	CPS1	-0.4718	0.8403	-1.4203
CPC006_VCAP_6H:BRD-K58550667-001-01-2:0.08	BRD-K58550667	FK-866	VCAP	trt_cp	0.08 uM	6 h	4	99	0.34	0.185519	1	0	1	1	0	Niacinamide phosphoribosyltransferase inhibitor	NAMPT|PARP1	-0.4718	0.8403	-1.4203
EMU001_MINO_6H:L01	BRD-K92428153	mycophenolate-mofetil	MINO	trt_cp	10 uM	6 h	3	357	0.3972	0.380776	0	0	1	1	0	Inosine monophosphate dehydrogenase inhibitor|Dehydrogenase inhibitor|Hydroxycarboxylic acid receptor agonist|Immunosuppressant|Inositol monophosphatase inhibitor	IMPDH1|IMPDH2|HCAR2	-0.4718	0.8403	-1.4203
CPC005_HCC515_6H:BRD-A65440446-001-03-3:10	BRD-A65440446	cimaterol	HCC515	trt_cp	10 uM	6 h	2	164	0.03	0.0709273	1	0	1	1	0	Adrenergic receptor agonist	ADRB1|ADRB2|ADRB3	-0.4718	0.8403	-1.4202
REP.B024_HEK293_24H:I17	BRD-K76841105	tazarotene	HEK293	trt_cp	0.03 uM	24 h	2	239	0.4205	0.320562	0	0	1	1	0	Retinoid receptor agonist	RARG|RARA|RARB|ODC1|RXRB	-0.4718	0.8403	-1.4201
REP.B012_PC3_24H:G08	BRD-A01636364	bupivacaine	PC3	trt_cp	0.74 uM	24 h	2	49	0.1259	0.0794221	0	0	1	1	0	Sodium channel inhibitor	SCN9A|KCNA5|PTGER1|SCN10A|SCN4A	-0.4717	0.8403	-1.4199
REP.B024_MCF7_24H:B22	BRD-K73794685	azithromycin	MCF7	trt_cp	0.08 uM	24 h	2	150	0.1538	0.153587	0	0	1	1	0	Bacterial 50S ribosomal subunit inhibitor	MLNR	-0.4717	0.8403	-1.4198
CPC016_HT29_6H:BRD-K67831364-003-01-7:10	BRD-K67831364	ZM-323881	HT29	trt_cp	10 uM	6 h	5	198	0.17	0.185519	1	0	1	1	0	VEGFR inhibitor	KDR	-0.4717	0.8403	-1.4198
CPD001_PC3_24H:BRD-K96253961-346-03-5:10	BRD-K96253961	metaraminol	PC3	trt_cp	10 uM	24 h	3	129	0.21	0.166431	1	0	1	1	0	Adrenergic receptor agonist	ADRA1A	-0.4716	0.8403	-1.4197
ISO002_HCT116.WT_24H:I21	BRD-K43187018	GDC-0349	HCT116	trt_cp	1.11 uM	24 h	3	154	0.6307	0.315139	1	1	1	1	0	PIM inhibitor	PIM3|PIK3CA	-0.4716	0.8403	-1.4195
CPC004_A375_6H:BRD-K39733634-001-01-8:10	BRD-K39733634	L-161982	A375	trt_cp	10 uM	6 h	3	99	0.12	0.110215	1	0	1	1	0	Prostanoid receptor antagonist	PTGER4	-0.4715	0.8403	-1.4194
REP.B019_YAPC_24H:G19	BRD-K47642186	piclamilast	YAPC	trt_cp	2.22 uM	24 h	2	65	0.2226	0.121633	1	1	1	1	0	Phosphodiesterase inhibitor	PDE4A|PDE4B|PDE4D|PDE4C	-0.4715	0.8403	-1.4193
CPC003_PC3_6H:BRD-K07507905-236-01-8:10	BRD-K07507905	BRL-37344	PC3	trt_cp	10 uM	6 h	4	104	0.12	0.112963	1	1	1	1	0	Adrenergic receptor agonist	ADRB3|ADRB1|ADRB2	-0.4714	0.8403	-1.4191
REP.B024_HEK293_24H:M02	BRD-A78341343	regadenoson	HEK293	trt_cp	0.74 uM	24 h	2	65	0.0482	0.0565993	0	0	1	1	0	Adenosine receptor agonist	ADORA2A|ADORA1|ADORA2B|ADORA3	-0.4714	0.8403	-1.4189
REP.A004_YAPC_24H:M15	BRD-K24968862	SB-683698	YAPC	trt_cp	1.11 uM	24 h	3	129	0.1136	0.122409	0	0	1	1	0	Integrin inhibitor	ITGA4|ITGAV|ITGB1|ITGB7	-0.4713	0.8403	-1.4188
REP.B016_THP1_24H:G10	BRD-K53318339	vinpocetine	THP1	trt_cp	0.08 uM	24 h	2	53	0.2303	0.111716	1	1	1	1	0	Phosphodiesterase inhibitor|Sodium channel blocker	PDE1A|SCN10A|PDE1C	-0.4713	0.8403	-1.4188
REP.A026_HEK293_24H:K21	BRD-K92049597	triamterene	HEK293	trt_cp	1.11 uM	24 h	2	72	0.0666	0.0700219	0	0	1	1	0	Sodium channel inhibitor	SCNN1A|SCNN1B|SCNN1G|SCNN1D	-0.4712	0.8403	-1.4184
LJP005_MCF10A_3H:N13	BRD-K81528515	nilotinib	MCF10A	trt_cp	10 uM	3 h	2	141	0.4042	0.241401	1	1	1	1	0	Bcr-Abl inhibitor|Abl inhibitor	ABL1|KIT|BCR|CYP2B6|CYP2C8|DDR1|DDR2|PDGFRA	-0.4711	0.8403	-1.4183
CPC006_H1299_6H:BRD-K67566344-001-01-8:10	BRD-K67566344	KU-0063794	H1299	trt_cp	10 uM	6 h	2	111	0.4	0.21307	0	0	1	1	0	MTOR inhibitor	MTOR	-0.4712	0.8403	-1.4183
CPC015_ASC_24H:BRD-A55393291-001-05-7:10	BRD-A55393291	testosterone	ASC	trt_cp	10 uM	24 h	4	328	0.34	0.337681	0	0	1	1	0	Androgen receptor agonist	AR|CYP2C19|CYP2C8|CYP3A5|CYP19A1	-0.4712	0.8403	-1.4183
CPC002_VCAP_24H:BRD-K95851186-001-02-9:10	BRD-K95851186	CGP-13501	VCAP	trt_cp	10 uM	24 h	3	96	0.3	0.171604	1	1	1	1	0	GABA receptor antagonist	GABBR1	-0.4711	0.8403	-1.418
CPC016_HT29_6H:BRD-K87510569-001-01-0:10	BRD-K87510569	RS-504393	HT29	trt_cp	10 uM	6 h	5	341	0.26	0.301089	1	0	1	1	0	CC chemokine receptor antagonist	CCR2|CCL2	-0.471	0.8403	-1.4179
CPC018_HT29_6H:BRD-A78322124-003-06-6:10	BRD-A78322124	dobutamine	HT29	trt_cp	10 uM	6 h	5	136	0.07	0.0986618	1	0	1	1	0	Adrenergic receptor agonist	ADRB1|ADRB2|ADRA1A	-0.471	0.8403	-1.4179
CPC004_VCAP_24H:C14	BRD-K14693417	cinchonine	VCAP	trt_cp	10 uM	24 h	6	126	0.18	0.152283	0	0	1	1	0	P-glycoprotein inhibitor	CYP2D6	-0.471	0.8403	-1.4179
REP.B010_MDAMB231_24H:A22	BRD-A12230535	nutlin-3	MDAMB231	trt_cp	0.08 uM	24 h	2	96	0.2803	0.165874	1	1	1	1	0	MDM inhibitor	MDM2|TP53	-0.471	0.8403	-1.4179
REP.B003_HA1E_24H:I07	BRD-K33852358	arofylline	HA1E	trt_cp	2.22 uM	24 h	3	76	0.2267	0.132728	1	0	1	1	0	Phosphodiesterase inhibitor	PDE4A|PDE4B|PDE4C|PDE4D	-0.471	0.8403	-1.4178
CPC016_NEU_24H:BRD-K63516691-003-01-2:10	BRD-K63516691	T-0156	NEU	trt_cp	10 uM	24 h	3	91	0.07	0.080705	0	0	1	1	0	Phosphodiesterase inhibitor	PDE5A	-0.471	0.8403	-1.4178
CPC011_HA1E_6H:BRD-K47278471-003-21-4:10	BRD-K47278471	diphenhydramine	HA1E	trt_cp	10 uM	6 h	2	93	0.34	0.179809	1	1	1	1	0	Histamine receptor antagonist	HRH1	-0.471	0.8403	-1.4177
REP.B016_HEK293_24H:H01	BRD-A53176877	methylprednisolone	HEK293	trt_cp	2.22 uM	24 h	2	108	0.1655	0.135189	0	0	1	1	0	Glucocorticoid receptor agonist	NR3C1	-0.4709	0.8403	-1.4176
REP.B019_MDAMB231_24H:N15	BRD-K49840922	etofylline-clofibrate	MDAMB231	trt_cp	0.25 uM	24 h	2	85	0.1219	0.10293	1	0	1	1	0	Platelet aggregation inhibitor|Lipase clearing factor inhibitor	LPL|PPARA	-0.4709	0.8403	-1.4175
REP.A016_HELA_24H:K19	BRD-K55127134	fluphenazine	HELA	trt_cp	10 uM	24 h	3	122	0.259	0.179746	1	1	1	1	0	Dopamine receptor antagonist	DRD2|DRD1|CHRNA7|CALM1|DRD5|HRH1|HTR2A|HTR6|HTR7	-0.4709	0.8403	-1.4174
CPC006_PC3_6H:BRD-K69932463-001-03-1:10	BRD-K69932463	AZD-8055	PC3	trt_cp	10 uM	6 h	4	413	0.62	0.511684	1	1	1	1	0	MTOR inhibitor	MTOR	-0.4708	0.8403	-1.4173
CPC006_NCIH508_6H:BRD-K95609758-001-02-9:10	BRD-K95609758	BMS-191011	NCIH508	trt_cp	10 uM	6 h	2	47	0.5	0.155012	1	1	1	1	0	Potassium channel activator	KCNMA1	-0.4708	0.8403	-1.4172
REP.A003_HT29_24H:J12	BRD-K33882852	ZK-93423	HT29	trt_cp	0.04 uM	24 h	3	134	0.1992	0.165207	0	0	1	1	0	Benzodiazepine receptor agonist	GABRA1|GABRA2|GABRA3|GABRA5|GABRB2|GABRG2	-0.4708	0.8403	-1.4172
REP.A010_MCF7_24H:I24	BRD-K14175878	MK-0812	MCF7	trt_cp	0.04 uM	24 h	3	51	0.1917	0.0999831	0	0	1	1	0	CC chemokine receptor antagonist	CCR2	-0.4708	0.8403	-1.4171
CPC015_HEPG2_6H:BRD-K53737926-003-14-6:10	BRD-K53737926	amitriptyline	HEPG2	trt_cp	10 uM	6 h	2	81	0.04	0.0575577	0	0	1	1	0	Norepinephrine inhibitor|Norepinephrine reuptake inhibitor|Serotonin receptor antagonist|Serotonin reuptake inhibitor	SLC6A2|SLC6A4|CHRM1|CHRM2|CHRM3|CHRM4|CHRM5|HRH1|HTR6|CYP2C19|CYP3A5|SCN4A|ADRA1A|ADRA1B|ADRA1D|ADRA2A|ADRB1|ADRB2|ADRB3|HRH2|HRH4|HTR1A|HTR1B|HTR1D|HTR2A|HTR2C|HTR7|KCNA1|KCND2|KCND3|KCNQ2|KCNQ3|NTRK1|NTRK2|OPRD1|OPRK1|OPRM1|SIGMAR1	-0.4708	0.8403	-1.4171
REP.B001_HA1E_24H:F20	BRD-K26712974	VX-765	HA1E	trt_cp	0.74 uM	24 h	3	89	0.3462	0.177496	1	1	1	1	0	Caspase inhibitor	CASP1|IL18R1	-0.4708	0.8403	-1.4171
REP.B025_MCF7_24H:A17	BRD-K97746869	chlorpropamide	MCF7	trt_cp	0.03 uM	24 h	2	147	0.1534	0.151845	0	0	1	1	0	ATP channel blocker	ABCC8|KCNJ10|KCNJ11	-0.4707	0.8403	-1.4169
REP.A003_HELA_24H:L10	BRD-K34469523	levalbuterol	HELA	trt_cp	0.37 uM	24 h	3	57	0.2122	0.111209	1	0	1	1	0	Adrenergic receptor agonist	ADRB2	-0.4707	0.8403	-1.4169
CVD001_HUH7_6H:BRD-K55468218-001-16-2:10	BRD-K55468218	spiperone	HUH7	trt_cp	10 uM	6 h	3	390	0.64	0.505188	0	0	1	1	0	Dopamine receptor antagonist	DRD2|ADRA1A|DRD3|DRD4|HTR1A|HTR2A|HTR7|ADRA1B|ADRA1D|DRD1|DRD5|HTR1D|HTR2B|HTR2C|HTR6	-0.4707	0.8403	-1.4169
LJP006_HA1E_24H:G16	BRD-K88378636	withaferin-a	HA1E	trt_cp	0.37 uM	24 h	3	156	0.52	0.288001	1	1	1	1	0	IKK inhibitor	IKBKB|NAMPT	-0.4707	0.8403	-1.4168
LJP007_MDAMB231_24H:I17	BRD-K71035033	masitinib	MDAMB231	trt_cp	0.12 uM	24 h	2	241	0.5101	0.354541	1	1	1	1	0	KIT inhibitor|PDGFR inhibitor|Src inhibitor	KIT|FGFR3|LYN|PDGFRB|PDGFRA	-0.4706	0.8403	-1.4166
CPC018_SKB_24H:BRD-K54142781-003-02-7:10	BRD-K54142781	cirazoline	SKB	trt_cp	10 uM	24 h	3	162	0.41	0.260603	0	0	1	1	0	Adrenergic receptor agonist	ADRA1A	-0.4706	0.8403	-1.4166
CPC005_PC3_24H:BRD-K67511046-003-03-7:10	BRD-K67511046	naloxone	PC3	trt_cp	10 uM	24 h	5	174	0.1	0.133384	1	0	1	1	0	Opioid receptor antagonist	OPRM1|OPRK1|OPRD1|CREB1|ESR1|TLR4	-0.4706	0.8403	-1.4165
CPC004_HT29_6H:BRD-K35960502-001-10-1:10	BRD-K35960502	niclosamide	HT29	trt_cp	10 uM	6 h	5	387	0.6	0.487261	0	0	1	1	0	DNA inhibitor|STAT inhibitor	STAT3	-0.4705	0.8403	-1.4164
PBIOA021_A549_24H:C08	BRD-K87737963	CYT-387	A549	trt_cp	3.33 uM	24 h	3	267	0.42	0.338619	1	1	1	1	0	JAK inhibitor	JAK1|JAK2|JAK3	-0.4705	0.8403	-1.4163
REP.A014_YAPC_24H:H09	BRD-K59573506	BRD-K59573506	YAPC	trt_cp	1.11 uM	24 h	3	127	0.321	0.204167	1	1	1	1	0	Androgen receptor antagonist|Progesterone receptor agonist|Testosterone receptor antagonist	AR|ADORA1	-0.4705	0.8403	-1.4162
CPC015_SKB_24H:BRD-K32830106-001-01-8:10	BRD-K32830106	guanfacine	SKB	trt_cp	10 uM	24 h	2	107	0.39	0.206564	0	0	1	1	0	Adrenergic receptor agonist	ADRA2A|ADRA2B|CYP3A5|HCN1|HCN2|HCN3|HCN4|ADRA2C	-0.4704	0.8403	-1.416
LPROT002_NPC.TAK_6H:BRD-K93480852:0.1	BRD-K93480852	KN-93	NPC	trt_cp	0.12 uM	6 h	3	111	0.21	0.154384	1	1	1	1	0	Calcium channel blocker	CAMK2A	-0.4704	0.8403	-1.416
CPC018_SKB_24H:BRD-K76617868-003-03-6:10	BRD-K76617868	fasudil	SKB	trt_cp	10 uM	24 h	3	136	0.04	0.0745813	0	0	1	1	0	Rho associated kinase inhibitor	ROCK1|ROCK2|PKIA|PRKACA	-0.4704	0.8403	-1.4159
CPC018_HT29_6H:BRD-K08640512-003-01-5:10	BRD-K08640512	RS-100329	HT29	trt_cp	10 uM	6 h	5	173	0.22	0.197272	1	0	1	1	0	Adrenergic receptor antagonist	ADRA1A|ADRA1D	-0.4703	0.8403	-1.4158
REP.A003_A549_24H:M12	BRD-K35586044	yohimbine	A549	trt_cp	0.04 uM	24 h	3	130	0.1869	0.157618	0	0	1	1	0	Adrenergic receptor antagonist	ADRA2A|ADRA2C|ADRA2B|HTR1A|HTR1B|HTR1D|HTR2B|DRD2|DRD3|HTR1E|HTR1F|HTR2A|HTR2C|HTR5A|HTR7|KCNJ1|KCNJ10|KCNJ11|KCNJ12|KCNJ14|KCNJ15|KCNJ8	-0.4703	0.8403	-1.4157
ISO002_HCT116.WT_24H:J15	BRD-A69815203	cyclosporin-a	HCT116	trt_cp	1.11 uM	24 h	3	68	0.433	0.173512	1	1	1	1	0	Calcineurin inhibitor	PPIA|PPP3CA	-0.4702	0.8403	-1.4155
REP.A024_YAPC_24H:K13	BRD-K78010432	furosemide	YAPC	trt_cp	10 uM	24 h	3	114	0.1419	0.12861	1	0	1	1	0	Diuretic	SLC12A1|SLC12A2|CA2|GPR35	-0.4702	0.8403	-1.4155
REP.A015_THP1_24H:H01	BRD-K57545991	enalapril	THP1	trt_cp	10 uM	24 h	2	129	0.1509	0.141081	1	1	1	1	0	ACE inhibitor	ACE	-0.4702	0.8403	-1.4154
MOAR005_PC3_24H:L18	BRD-K00675675	CL-82198	PC3	trt_cp	1.11 uM	24 h	3	52	0.09	0.0691757	1	0	1	1	0	Metalloproteinase inhibitor	MMP13	-0.4702	0.8403	-1.4154
NMH001_NPC_6H:BRD-K67013324-001-02-3:10	BRD-K67013324	luzindole	NPC	trt_cp	10 uM	6 h	3	90	0.14	0.113505	1	0	1	1	0	Melatonin receptor antagonist	MTNR1B|MTNR1A	-0.4702	0.8403	-1.4154
CPC017_SKB_24H:BRD-A71262238-001-04-3:10	BRD-A71262238	nafadotride	SKB	trt_cp	10 uM	24 h	2	113	0.37	0.206762	0	0	1	1	0	Dopamine receptor antagonist	DRD3|DRD2|HTR1A	-0.4702	0.8403	-1.4153
CPC018_PHH_24H:BRD-K91301684-003-03-0:10	BRD-K91301684	noscapine	PHH	trt_cp	10 uM	24 h	2	104	0.14	0.122014	0	0	1	1	0	Bradykinin receptor antagonist|Tubulin polymerization inhibitor	BDKRB2|SIGMAR1	-0.4702	0.8403	-1.4153
CPC015_A549_24H:BRD-A59174698-003-12-8:10	BRD-A59174698	ritodrine	A549	trt_cp	10 uM	24 h	3	77	0.27	0.1458	1	0	1	1	0	Adrenergic receptor agonist	ADRB2	-0.4701	0.8403	-1.4152
REP.A018_HA1E_24H:L24	BRD-K65928735	AZD-1480	HA1E	trt_cp	0.04 uM	24 h	3	193	0.2577	0.22551	1	1	1	1	0	JAK inhibitor	JAK1|JAK2|JAK3	-0.47	0.8397	-1.4147
REP.A026_MCF10A_24H:D07	BRD-K88429204	pyrimethamine	MCF10A	trt_cp	10 uM	24 h	3	259	0.3671	0.311798	1	1	1	1	0	Dihydrofolate reductase inhibitor	DHFRP1|HEXA|STAT3|DHFR|SLC47A1	-0.47	0.8397	-1.4147
POL001_PC3_24H:I14	BRD-K51575138	TPCA-1	PC3	trt_cp	3.33 uM	24 h	3	138	0.38	0.231559	1	1	1	1	0	IKK inhibitor	IKBKB	-0.4699	0.8392	-1.4146
CPC003_HCC515_24H:BRD-K75089421-003-15-3:10	BRD-K75089421	procainamide	HCC515	trt_cp	10 uM	24 h	3	135	0.28	0.196597	1	1	1	1	0	Sodium channel inhibitor	SCN5A|DNMT1	-0.4699	0.8377	-1.4144
CPC015_SKB_24H:BRD-A02759312-003-11-2:10	BRD-A02759312	betaxolol	SKB	trt_cp	10 uM	24 h	2	76	0.09	0.0836293	0	0	1	1	0	Adrenergic receptor antagonist	ADRB1|ADRB2	-0.4698	0.8373	-1.4143
CPC013_A549_24H:BRD-K16621777-001-01-9:10	BRD-K16621777	enobosarm	A549	trt_cp	10 uM	24 h	3	94	0.26	0.158082	1	0	1	1	0	Androgen receptor antagonist	AR	-0.4697	0.8368	-1.414
REP.A016_MDAMB231_24H:I07	BRD-K53963539	vortioxetine	MDAMB231	trt_cp	10 uM	24 h	3	167	0.4108	0.264852	1	1	1	1	0	Serotonin receptor agonist|Serotonin receptor antagonist	HTR1A|HTR1B|HTR7|SLC6A4|HTR1D|CYP2B6|CYP2C19|CYP2C8|CYP3A5|HTR2A|HTR2C|HTR3A|HTR5A|HTR6	-0.4697	0.8367	-1.4139
CPC006_HT29_24H:BRD-K19894101-001-01-6:11.1	BRD-K19894101	MST-312	HT29	trt_cp	12 uM	24 h	4	135	0.29	0.200077	1	1	1	1	0	Telomerase inhibitor	TERT	-0.4697	0.8364	-1.4138
CPC014_PC3_6H:BRD-K22429181-001-08-4:10	BRD-K22429181	retinol	PC3	trt_cp	10 uM	6 h	4	187	0.42	0.283384	1	1	1	1	0	Retinoid receptor agonist	ALDH1A1|ALDH1A2|ALDH1A3|DHRS3|DHRS4|LRAT|NR2C2|RBP1|RBP3|RDH11|RDH12|RDH13|RDH14|RDH5|RDH8|RETSAT|RHO|RLBP1|RXRA|RXRB|RXRG	-0.4696	0.8362	-1.4136
CPC016_MCF7_24H:BRD-K95851186-001-02-9:10	BRD-K95851186	CGP-13501	MCF7	trt_cp	10 uM	24 h	4	98	0.08	0.0895341	1	0	1	1	0	GABA receptor antagonist	GABBR1	-0.4696	0.8362	-1.4135
LRS001_PHH.MGH_24H:J01	BRD-K16406336	methylene-blue	PHH	trt_cp	10 uM	24 h	2	119	0.65	0.281229	1	1	1	1	0	Nitric oxide production inhibitor|Guanylyl cyclase inhibitor|Monoamine oxidase inhibitor|Tau aggregation inhibitor	ACHE|MAPT	-0.4695	0.8359	-1.4134
REP.A010_MCF10A_24H:N02	BRD-A14941520	dofequidar	MCF10A	trt_cp	3.33 uM	24 h	2	44	0.1731	0.0882481	1	1	1	1	0	MRP inhibitor|P-glycoprotein inhibitor	ABCB1|ABCC1	-0.4695	0.8353	-1.4133
REP.B016_MCF7_24H:O15	BRD-A54880345	etomidate	MCF7	trt_cp	0.25 uM	24 h	2	82	0.1403	0.108459	1	0	1	1	0	Membrane integrity inhibitor|Membrane permeability inhibitor|GABA receptor modulator	GABRA1|GABRA2|GABRA3|GABRA4|GABRA5|GABRA6|GABRB1|GABRB2|GABRB3|GABRD|GABRE|GABRG1|GABRG2|GABRG3|GABRP|GABRQ|ADRA2B	-0.4694	0.8333	-1.4131
REP.A022_YAPC_24H:F17	BRD-A69636825	diltiazem	YAPC	trt_cp	0.125 uM	24 h	3	224	0.445	0.319253	1	1	1	1	0	Calcium channel blocker	CACNA1C|CYP3A5|CYP3A7|CACNA1S|CACNA2D1|CACNG1|HTR3A|KCNA5	-0.4694	0.8333	-1.4131
LJP009_SHSY5Y_24H:A19	BRD-A10523515	GSK-429286A	SHSY5Y	trt_cp	10 uM	24 h	3	134	0.3011	0.203113	0	0	1	1	0	Rho associated kinase inhibitor	ROCK1	-0.4694	0.8333	-1.4131
MUC.CP008_P1A82_24H:F19	BRD-K35629949	SR-27897	P1A82	trt_cp	10 uM	24 h	3	201	0.4	0.28672	1	1	1	1	0	CCK receptor antagonist	CCKAR	-0.4693	0.8333	-1.4128
REP.A005_A375_24H:E19	BRD-K09078998	deforolimus	A375	trt_cp	10 uM	24 h	3	314	0.5331	0.413714	1	1	1	1	0	MTOR inhibitor	MTOR	-0.4693	0.8333	-1.4127
CPC011_A375_6H:BRD-A22256192-311-02-6:10	BRD-A22256192	terazosin	A375	trt_cp	10 uM	6 h	3	37	0.4	0.123016	1	0	1	1	0	Adrenergic receptor antagonist	ADRA1D|ADRA1A|ADRA1B|KCNH2|KCNH6|KCNH7	-0.4693	0.8333	-1.4127
LIVB002_HUH7_72H:H16	BRD-A19736161	ondansetron	HUH7	trt_cp	12 uM	72 h	3	103	0.11	0.107633	0	0	1	1	0	Serotonin receptor antagonist	HTR3A|CYP2D6|CYP3A5|HTR1A|HTR1B|HTR3B|HTR4|OPRM1	-0.4693	0.8333	-1.4126
CPC004_HT29_6H:BRD-A25687296-300-03-5:10	BRD-A25687296	emetine	HT29	trt_cp	10 uM	6 h	5	562	0.7	0.634231	0	0	1	1	0	Protein synthesis inhibitor	RPS2	-0.4693	0.8333	-1.4126
CPC016_NEU_24H:BRD-K90027355-001-03-4:10	BRD-K90027355	spironolactone	NEU	trt_cp	10 uM	24 h	3	238	0.15	0.191058	0	0	1	1	0	Mineralocorticoid receptor antagonist	NR3C2|KCNA5|KCND3|SCNN1A|AR|CACNA1A|CACNA1B|CACNA1C|CACNA1D|CACNA1F|CACNA1G|CACNA1H|CACNA1I|CACNA1S|CACNA2D1|CACNA2D2|CACNA2D3|CACNB1|CACNB2|CACNB3|CACNB4|CACNG1|CYP11B2|NR3C1|PGR|SHBG	-0.4693	0.8333	-1.4126
REP.B023_A375_24H:B22	BRD-K68095457	palmitoylethanolamide	A375	trt_cp	0.08 uM	24 h	2	118	0.1249	0.122759	1	1	1	1	0	Cannabinoid receptor agonist	CNR2|GPR119|GPR55	-0.4692	0.8333	-1.4125
CPC004_HCC515_24H:BRD-K36055864-001-09-3:10	BRD-K36055864	cycloheximide	HCC515	trt_cp	10 uM	24 h	3	485	0.76	0.613915	1	1	1	1	0	Protein synthesis inhibitor	GSK3B|RPL3	-0.4692	0.8333	-1.4124
REP.B008_MDAMB231_24H:J12	BRD-K89015388	GSK-923295	MDAMB231	trt_cp	0.01 uM	24 h	2	125	0.3007	0.196043	1	1	1	1	0	Centromere associated protein inhibitor	CENPE	-0.4692	0.8333	-1.4124
CPC005_VCAP_6H:BRD-K13211965-003-01-0:10	BRD-K13211965	L-741742	VCAP	trt_cp	10 uM	6 h	4	194	0.19	0.194137	0	0	1	1	0	Dopamine receptor antagonist	DRD4|DRD3|SCN1A|SCN3A	-0.4691	0.8333	-1.4121
CPC004_PC3_24H:BRD-K35941380-050-17-0:10	BRD-K35941380	methysergide	PC3	trt_cp	10 uM	24 h	5	47	0.17	0.0903866	0	0	1	1	0	Serotonin receptor antagonist	HTR2C|HTR1B|HTR1E|HTR1F|HTR2A|HTR2B|HTR7|HTR1A|HTR1D|HTR5A|HTR6	-0.4691	0.8333	-1.4121
REP.A026_YAPC_24H:L24	BRD-K92093830	doxorubicin	YAPC	trt_cp	0.04 uM	24 h	2	221	0.3997	0.300534	0	0	1	1	0	Topoisomerase inhibitor	TOP2A	-0.4691	0.8333	-1.4121
REP.A015_MDAMB231_24H:M24	BRD-K60237333	niacin	MDAMB231	trt_cp	0.04 uM	24 h	2	116	0.2847	0.183761	1	1	1	1	0	NADPH inhibitor|Vitamin B	HCAR2|HCAR3|DGAT2|HCAR1|NNMT|QPRT	-0.4691	0.8333	-1.412
CPC014_PHH_24H:BRD-K56343971-001-01-5:10	BRD-K56343971	vemurafenib	PHH	trt_cp	10 uM	24 h	4	218	0.1	0.1493	0	0	1	1	0	RAF inhibitor	BRAF|CYP2C19|CYP3A4|CYP3A5|RAF1	-0.469	0.8333	-1.4118
REP.B024_A375_24H:C10	BRD-K74190368	resorcinol	A375	trt_cp	0.08 uM	24 h	2	90	0.172	0.12581	1	1	1	1	0	Phosphodiesterase inhibitor	CA12|CA14|CA2|PTGS1	-0.469	0.8333	-1.4118
CPC003_PC3_24H:BRD-K34995470-001-02-3:10	BRD-K34995470	SU-1498	PC3	trt_cp	10 uM	24 h	5	186	0.24	0.213645	1	1	1	1	0	VEGFR inhibitor	ERBB2	-0.469	0.8333	-1.4117
REP.B009_MDAMB231_24H:O07	BRD-A34255068	rolipram	MDAMB231	trt_cp	2.22 uM	24 h	2	101	0.3578	0.192226	1	1	1	1	0	Phosphodiesterase inhibitor	PDE4A|PDE4B|PDE4D|PDE4C	-0.4689	0.8333	-1.4116
CPC016_A375_6H:BRD-K81729199-001-01-0:10	BRD-K81729199	AQ-RA741	A375	trt_cp	10 uM	6 h	5	88	0.11	0.0994874	0	0	1	1	0	Acetylcholine receptor antagonist	CHRM2	-0.4689	0.8333	-1.4115
CPC004_VCAP_24H:A07	BRD-K08109516	L-701324	VCAP	trt_cp	10 uM	24 h	6	144	0.16	0.153487	0	0	1	1	0	Glutamate receptor antagonist	GRIN1|GRIN2A|GRIN2B|GRIN2C|GRIN2D	-0.4688	0.8333	-1.4113
CPD001_MCF7_24H:BRD-K44067360-001-19-6:10	BRD-K44067360	flufenamic-acid	MCF7	trt_cp	10 uM	24 h	3	107	0.26	0.168659	1	0	1	1	0	Chloride channel blocker	AKR1C3|AR|PTGS1|PTGS2|ANO1|GJA1|GJA10|GJA3|GJA4|GJA5|GJA8|GJA9|GJB1|GJB2|GJB3|GJB4|GJB5|GJB6|GJB7|GJC1|GJC2|GJC3|GJD2|GJD3|GJD4|GJE1|PANX1|PANX2|PANX3|PKD2L1|TRPC5|TRPM2|TRPM5	-0.4688	0.8331	-1.4112
CPC005_MCF7_6H:G05	BRD-K09991945	BRD-K09991945	MCF7	trt_cp	10 uM	6 h	4	119	0.2047	0.15782	1	1	1	1	0	PKC inhibitor	GSK3B	-0.4688	0.8326	-1.4111
CPC017_HT29_6H:BRD-A03359064-001-01-5:10	BRD-A03359064	ICI-89406	HT29	trt_cp	10 uM	6 h	5	254	0.29	0.274439	0	0	1	1	0	Adrenergic receptor antagonist	ADRB1|ADRB2	-0.4688	0.8326	-1.4111
REP.A007_YAPC_24H:L11	BRD-K53765467	empagliflozin	YAPC	trt_cp	0.125 uM	24 h	3	121	0.3161	0.197759	1	0	1	1	0	Sodium channel inhibitor	SLC5A2|SLC5A1	-0.4687	0.8322	-1.411
REP.B003_HA1E_24H:D10	BRD-A31811760	miltefosine	HA1E	trt_cp	0.08 uM	24 h	3	136	0.3172	0.210023	1	0	1	1	0	Membrane integrity inhibitor	PLA2G1B	-0.4687	0.8324	-1.411
REP.A005_A549_24H:D01	BRD-K08248804	LCL-161	A549	trt_cp	10 uM	24 h	3	192	0.2792	0.23412	0	0	1	1	0	XIAP inhibitor	BIRC2|XIAP	-0.4686	0.8283	-1.4105
REP.B021_HA1E_24H:O16	BRD-K86797399	SB-939	HA1E	trt_cp	0.08 uM	24 h	2	221	0.5356	0.347894	1	1	1	1	0	HDAC inhibitor	HDAC1|HDAC2|HDAC10|HDAC3|HDAC4|HDAC5|HDAC9	-0.4685	0.828	-1.4104
REP.A020_MCF7_24H:A19	BRD-K83405785	pimavanserin	MCF7	trt_cp	10 uM	24 h	3	225	0.3812	0.296141	1	1	1	1	0	Serotonin receptor antagonist	HTR2A|DRD2	-0.4685	0.828	-1.4104
AICHI002_NALM6_24H:N09	BRD-K72414522	AZD-5438	NALM6	trt_cp	0.66 uM	24 h	3	359	0.64	0.484694	1	1	1	1	0	CDK inhibitor	CCNB1|CCNE1|CDK1|CDK2|KCNH2	-0.4685	0.828	-1.4103
LJP008_HEK293_24H:I13	BRD-K26818574	BIX-01294	HEK293	trt_cp	10 uM	24 h	2	150	0.3982	0.247131	1	1	1	1	0	DNA inhibitor|Histone lysine methyltransferase inhibitor	EHMT2|EHMT1	-0.4685	0.828	-1.4102
REP.B020_HT29_24H:I14	BRD-K45117373	Y-26763	HT29	trt_cp	0.74 uM	24 h	2	64	0.2317	0.123136	1	1	1	1	0	Potassium channel activator	KCNJ8|ABCC9	-0.4684	0.828	-1.4101
REP.B021_HT29_24H:H12	BRD-K82846253	repaglinide	HT29	trt_cp	0.01 uM	24 h	2	106	0.3877	0.204989	0	0	1	1	0	Insulin secretagogue	ABCC8|KCNJ11|CYP2C8|CYP3A5|INS|PPARG	-0.4684	0.828	-1.4101
LJP001_SKBR3_24H:M15	BRD-K25311561	KU-55933	SKBR3	trt_cp	10 uM	24 h	4	65	0.1504	0.0999795	1	0	1	1	0	ATM kinase inhibitor	ATM|PRKDC	-0.4684	0.828	-1.41
REP.B022_MCF7_24H:H14	BRD-K70912147	CO-102862	MCF7	trt_cp	0.74 uM	24 h	2	85	0.1908	0.128774	1	1	1	1	0	Sodium channel inhibitor	SCN2A|SCN4A|SCN9A	-0.4684	0.828	-1.41
CPC007_PC3_6H:BRD-K40213712-001-05-4:10	BRD-K40213712	SAL-1	PC3	trt_cp	10 uM	6 h	5	78	0.17	0.11644	1	0	1	1	0	Adenosine receptor antagonist	ADORA2B	-0.4684	0.8279	-1.4099
CPC005_HA1E_24H:BRD-K68402494-003-01-9:10	BRD-K68402494	ML-9	HA1E	trt_cp	10 uM	24 h	3	88	0.18	0.127265	1	0	1	1	0	Muscle relaxant	TRPC6	-0.4684	0.8279	-1.4099
CPC015_ASC_24H:BRD-K57545991-050-16-5:10	BRD-K57545991	enalapril	ASC	trt_cp	10 uM	24 h	4	120	0.13	0.126297	0	0	1	1	0	ACE inhibitor	ACE	-0.4684	0.8278	-1.4098
REP.A018_A549_24H:K19	BRD-K65820248	SDZ-NKT-343	A549	trt_cp	10 uM	24 h	2	94	0.2112	0.142476	1	1	1	1	0	Tachykinin antagonist	TACR1	-0.4683	0.8272	-1.4097
REP.A020_A375_24H:D06	BRD-K84466663	nelarabine	A375	trt_cp	0.04 uM	24 h	3	145	0.1742	0.160708	0	0	1	1	0	DNA inhibitor|T cell inhibitor	ADA|POLA1	-0.4682	0.8253	-1.4094
CPC006_MCF7_24H:L12	BRD-K33583600	BRD-K33583600	MCF7	trt_cp	10 uM	24 h	5	318	0.592	0.438738	1	1	1	1	0	Guanylate cyclase activator	AKR1B1|HRH2|SIRT1|GABBR1	-0.4682	0.8253	-1.4093
REP.B020_HA1E_24H:P24	BRD-A50033377	rivaroxaban	HA1E	trt_cp	0.01 uM	24 h	2	162	0.3566	0.243041	0	0	1	1	0	Coagulation factor inhibitor	F10|CYP2J2|CYP3A5	-0.4681	0.8239	-1.4092
MOAR006_PC3_24H:D17	BRD-K77793136	hydroxyfasudil	PC3	trt_cp	3.33 uM	24 h	3	54	0.1	0.0743066	1	0	1	1	0	Rho associated kinase inhibitor	ROCK1|ROCK2|PKIA|PRKACA	-0.4681	0.8232	-1.4091
CPC015_A375_6H:BRD-A92177080-001-01-3:10	BRD-A92177080	betamethasone-acetate	A375	trt_cp	10 uM	6 h	3	104	0.21	0.149437	1	1	1	1	0	Glucocorticoid receptor agonist	NR3C1	-0.4681	0.8207	-1.409
CPC016_MCF7_24H:BRD-K72783841-001-01-0:10	BRD-K72783841	BRD-K72783841	MCF7	trt_cp	10 uM	24 h	4	136	0.16	0.149163	1	1	1	1	0	EGFR inhibitor	EGFR	-0.4681	0.8209	-1.409
REP.B020_HA1E_24H:I14	BRD-K45117373	Y-26763	HA1E	trt_cp	0.74 uM	24 h	2	94	0.3136	0.173613	1	1	1	1	0	Potassium channel activator	KCNJ8|ABCC9	-0.4681	0.821	-1.409
CPC016_HEPG2_6H:BRD-K68264559-045-01-6:10	BRD-K68264559	brimonidine	HEPG2	trt_cp	10 uM	6 h	3	141	0.2	0.169807	1	0	1	1	0	Adrenergic receptor agonist	ADRA2A|ADRA2B|ADRA2C|AOX1	-0.468	0.8201	-1.4089
PAC003_U2OS_6H:BRD-K39188321-001-03-9:5.09605	BRD-K39188321	betamethasone	U2OS	trt_cp	4 uM	6 h	2	72	0.35	0.160521	1	1	1	1	0	Glucocorticoid receptor agonist	NR3C1	-0.468	0.8201	-1.4089
CPC004_PC3_6H:BRD-A75552914-001-09-3:10	BRD-A75552914	isoxicam	PC3	trt_cp	10 uM	6 h	5	189	0.2	0.196597	1	0	1	1	0	Cyclooxygenase inhibitor	PTGS1|PTGS2	-0.468	0.818	-1.4087
PBIOA018_A549_24H:J07	BRD-K79239947	PF-573228	A549	trt_cp	10 uM	24 h	3	165	0.24	0.201223	1	1	1	1	0	Focal adhesion kinase inhibitor	CDK1|CDK2|CDK7|GSK3B|IKBKB	-0.468	0.818	-1.4087
REP.A026_HEK293_24H:P16	BRD-K91740057	felbinac	HEK293	trt_cp	0.37 uM	24 h	2	200	0.0711	0.120581	0	0	1	1	0	Cyclooxygenase inhibitor	CTSL	-0.4679	0.818	-1.4083
ISO002_HCT116.TP53.HR_24H:A08	BRD-K53972329	ruxolitinib	HCT116	trt_cp	3.33 uM	24 h	3	189	0.6024	0.341196	1	1	1	1	0	JAK inhibitor	JAK1|JAK2|TYK2|JAK3	-0.4678	0.818	-1.4081
REP.A015_HEK293_24H:B24	BRD-K55930204	phenytoin	HEK293	trt_cp	0.04 uM	24 h	3	176	0.3947	0.266514	1	0	1	1	0	Hydantoin antiepileptic	SCN1A|SCN2A|SCN5A|ABCB1|CYP2B6|CYP2C19|CYP3A4|SCN10A|SCN11A|SCN3A|SCN4A|SCN7A|SCN8A|SCN9A	-0.4677	0.818	-1.4079
REP.B008_HELA_24H:P22	BRD-K90789829	nefazodone	HELA	trt_cp	0.08 uM	24 h	2	103	0.2172	0.151244	0	0	1	1	0	Serotonin receptor antagonist|Adrenergic receptor antagonist|Norepinephrine reuptake inhibitor|Serotonin reuptake inhibitor	HTR2A|SLC6A4|HTR2C|SLC6A2|CYP3A5|CYP3A7|ADRA1A|ADRA1B|ADRA2A|CYP3A4|HTR1A|SLC6A3	-0.4677	0.818	-1.4078
CPC004_HA1E_6H:BRD-A79981887-003-09-9:10	BRD-A79981887	midodrine	HA1E	trt_cp	10 uM	6 h	3	133	0.31	0.205323	1	0	1	1	0	Adrenergic receptor agonist	ADRA1A|ADRA1B|ADRA1D	-0.4677	0.818	-1.4078
CPC006_U937_6H:BRD-K06593056-001-02-2:20	BRD-K06593056	LE-135	U937	trt_cp	20 uM	6 h	2	138	0.56	0.281102	1	1	1	1	0	Retinoid receptor agonist	RARB	-0.4676	0.818	-1.4077
CPC006_NCIH2073_6H:BRD-K73261812-001-01-1:10	BRD-K73261812	BRD-K73261812	NCIH2073	trt_cp	10 uM	6 h	2	149	0.21	0.178868	0	0	1	1	0	Beta catenin inhibitor	CTNNB1	-0.4677	0.818	-1.4077
LJP005_HS578T_24H:F06	BRD-K79090631	CGP-60474	HS578T	trt_cp	0.04 uM	24 h	3	189	0.5	0.310847	1	1	1	1	0	CDK inhibitor	CDK1|CDK2	-0.4675	0.818	-1.4073
CPC002_PC3_24H:BRD-K86727142-001-06-6:10	BRD-K86727142	embelin	PC3	trt_cp	10 uM	24 h	5	312	0.34	0.329342	1	1	1	1	0	HCV inhibitor|XIAP inhibitor	XIAP	-0.4675	0.818	-1.4072
REP.A005_HA1E_24H:A13	BRD-A07986123	galeterone	HA1E	trt_cp	10 uM	24 h	3	177	0.4909	0.298067	1	1	1	1	0	Androgen receptor antagonist	AR|CYP17A1	-0.4674	0.818	-1.4071
CPC004_HA1E_24H:BRD-K75958195-037-04-5:10	BRD-K75958195	pizotifen	HA1E	trt_cp	10 uM	24 h	3	167	0.38	0.25473	1	1	1	1	0	Serotonin receptor antagonist	HTR2A|HTR1A|HTR2C	-0.4674	0.818	-1.407
CPC005_A549_24H:BRD-A43671941-003-03-6:10	BRD-A43671941	oxprenolol	A549	trt_cp	10 uM	24 h	2	62	0.21	0.115381	1	0	1	1	0	Adrenergic receptor antagonist	ADRB1|ADRB2	-0.4674	0.818	-1.4069
CPC006_U937_6H:BRD-A81541225-001-02-7:10	BRD-A81541225	oligomycin-a	U937	trt_cp	10 uM	6 h	2	42	0.09	0.0621694	1	0	1	1	0	ATP synthase inhibitor|ATPase inhibitor	ATP5A1	-0.4673	0.818	-1.4068
CPC020_VCAP_24H:BRD-K63828191-003-20-6:10	BRD-K63828191	raloxifene	VCAP	trt_cp	10 uM	24 h	5	149	0.27	0.202818	1	0	1	1	0	Estrogen receptor antagonist|Selective estrogen receptor modulator (SERM)	ESR1|ESR2|ACVRL1|ENG	-0.4673	0.818	-1.4066
REP.B012_MCF10A_24H:C18	BRD-K00610438	altanserin	MCF10A	trt_cp	0.01 uM	24 h	2	70	0.3778	0.164441	1	1	1	1	0	Serotonin receptor antagonist	HTR2A|HTR2C	-0.4672	0.818	-1.4065
LJP009_PC3_24H:A21	BRD-A10523515	GSK-429286A	PC3	trt_cp	1.11 uM	24 h	3	157	0.6422	0.321082	1	1	1	1	0	Rho associated kinase inhibitor	ROCK1	-0.4672	0.818	-1.4064
CPC008_PC3_6H:BRD-K42629487-001-05-2:10	BRD-K42629487	SF-11	PC3	trt_cp	10 uM	6 h	5	103	0.16	0.12981	1	0	1	1	0	Neuropeptide receptor antagonist	MCOLN3|NPY2R	-0.4672	0.818	-1.4064
REP.A003_PC3_24H:D16	BRD-K31841515	oxypurinol	PC3	trt_cp	0.37 uM	24 h	3	108	0.2579	0.168759	1	1	1	1	0	Xanthine oxidase inhibitor	XDH	-0.4672	0.818	-1.4063
REP.B028_HA1E_24H:L12	BRD-K63750851	BRD-K63750851	HA1E	trt_cp	0.01 uM	24 h	2	67	0.2699	0.135978	1	1	1	1	0	Dehydrogenase inhibitor|Inositol monophosphatase inhibitor	IMPDH1|IMPDH2	-0.4672	0.818	-1.4063
CPD003_MCF7_6H:BRD-K97799481-002-04-4:10	BRD-K97799481	theophylline	MCF7	trt_cp	10 uM	6 h	2	127	0.24	0.176538	0	0	1	1	0	Adenosine receptor antagonist	ADORA1|PDE3A|ADORA2A|ADORA2B|ADORA3|HDAC2|PDE3B|PDE4A|PDE4B|PDE4C|PDE4D|CHIA|CYP2E1|CYP3A4|PDE5A	-0.4672	0.818	-1.4063
LKCP001_A549_48H:E13	BRD-K84091759	candesartan	A549	trt_cp	10 uM	48 h	4	74	0.3085	0.152783	1	1	1	1	0	Angiotensin receptor antagonist	AGTR1	-0.4671	0.818	-1.4061
CPC020_VCAP_6H:BRD-K67102207-236-02-8:10	BRD-K67102207	phenylbutyrate	VCAP	trt_cp	10 uM	6 h	5	125	0.11	0.118572	1	0	1	1	0	HDAC inhibitor	CYP3A5|HDAC1	-0.4671	0.818	-1.4059
CPC006_SW480_6H:BRD-K04623885-001-03-4:80	BRD-K04623885	BIBR-1532	SW480	trt_cp	80 uM	6 h	2	112	0.29	0.182238	0	0	1	1	0	Telomerase inhibitor	TERT	-0.4671	0.818	-1.4059
PCL001_HCC515_24H:BRD-K39841531:0.12	BRD-K39841531	TG-101209	HCC515	trt_cp	0.12 uM	24 h	3	84	0.31	0.163174	1	1	1	1	0	JAK inhibitor	JAK2|JAK3	-0.467	0.818	-1.4057
CPC006_U937_6H:BRD-K98530306-003-07-6:10	BRD-K98530306	clonidine	U937	trt_cp	10 uM	6 h	2	25	0.17	0.0659212	1	0	1	1	0	Adrenergic receptor agonist	ADRA2A|ADRA2B|ADRA2C|ADRA1A|ADRA1B|ADRA1D	-0.4669	0.818	-1.4055
REP.A014_YAPC_24H:I13	BRD-A56371469	AGI-5198	YAPC	trt_cp	10 uM	24 h	3	165	0.2801	0.217385	1	0	1	1	0	Isocitrate dehydrogenase inhibitor	IDH1	-0.4669	0.818	-1.4054
REP.A011_A375_24H:M06	BRD-K07208025	trimethoprim	A375	trt_cp	0.04 uM	24 h	3	81	0.3604	0.172769	0	0	1	1	0	Dihydrofolate reductase inhibitor	CYP2C8|SLC22A2|DHFR|TYMS	-0.4667	0.8178	-1.4049
CPC018_PHH_24H:BRD-A41451487-001-04-7:10	BRD-A41451487	PK-11195	PHH	trt_cp	10 uM	24 h	3	78	0.19	0.123099	0	0	1	1	0	Benzodiazepine receptor antagonist	TSPO|NR1I2|NR1I3	-0.4666	0.8146	-1.4045
CPC006_U937_6H:BRD-K53414658-001-01-7:10	BRD-K53414658	tivozanib	U937	trt_cp	10 uM	6 h	2	50	0.12	0.078326	1	0	1	1	0	VEGFR inhibitor	FLT1|FLT4|KDR|KIT|PDGFRA|PDGFRB	-0.4666	0.8146	-1.4045
AICHI001_THP1_24H:D12	BRD-K63923597	barasertib-HQPA	THP1	trt_cp	0.01 uM	24 h	2	80	0.25	0.143003	1	1	1	1	0	Aurora kinase inhibitor	AURKB|AURKC|AURKA	-0.4665	0.8146	-1.4042
LJP006_HT29_24H:D18	BRD-K64890080	BI-2536	HT29	trt_cp	0.04 uM	24 h	2	187	0.6783	0.360132	1	1	1	1	0	PLK inhibitor	PLK1|BRD4|PLK2|PLK3	-0.4665	0.8146	-1.4042
REP.A028_HEK293_24H:G01	BRD-K93918653	quizartinib	HEK293	trt_cp	10 uM	24 h	2	131	0.2915	0.197599	0	0	1	1	0	FLT3 inhibitor	FLT3|CSF1R|KIT|RET|PDGFRA|PDGFRB	-0.4664	0.8146	-1.404
CPC014_PC3_24H:BRD-K25991148-001-01-7:10	BRD-K25991148	warfarin	PC3	trt_cp	10 uM	24 h	5	72	0.26	0.138351	1	0	1	1	0	Vitamin K antagonist	VKORC1|CYP2C19|CYP2C8|CYP4F2	-0.4664	0.8146	-1.404
PAC005_U2OS_6H:BRD-A78377521-001-02-2:17.1026	BRD-A78377521	monastrol	U2OS	trt_cp	15 uM	6 h	2	80	0.33	0.164298	1	1	1	1	0	Kinesin inhibitor	KIF11	-0.4663	0.8144	-1.4038
CPC018_MCF7_24H:BRD-K56596464-004-05-7:10	BRD-K56596464	QX-314	MCF7	trt_cp	10 uM	24 h	4	119	0.12	0.120836	1	0	1	1	0	Sodium channel inhibitor	MAPK14|TGFBR1	-0.4663	0.8145	-1.4038
AICHI001_HBL1_24H:I02	BRD-A17883755	lenalidomide	HBL1	trt_cp	2.5 uM	24 h	3	153	0.34	0.23063	0	0	1	1	0	Carcinogen	CRBN|TNF|CDH5|PTGS2|TNFSF11	-0.4663	0.8145	-1.4038
CPC001_HA1E_24H:BRD-K26521938-001-04-9:10	BRD-K26521938	dinoprostone	HA1E	trt_cp	10 uM	24 h	3	116	0.19	0.150119	1	1	1	1	0	Prostanoid receptor agonist	PTGER2|PTGER1|PTGER3|PTGER4|CATSPER1|CATSPER2|CATSPER3|CATSPER4|PTGDR|PTGDR2|PTGFR|TBXA2R	-0.4663	0.8144	-1.4037
CPC014_VCAP_24H:BRD-K93918653-001-01-4:10	BRD-K93918653	quizartinib	VCAP	trt_cp	10 uM	24 h	5	91	0.23	0.14629	0	0	1	1	0	FLT3 inhibitor	FLT3|CSF1R|KIT|RET|PDGFRA|PDGFRB	-0.4663	0.8142	-1.4036
REP.A028_A549_24H:B13	BRD-K92467929	oxandrolone	A549	trt_cp	10 uM	24 h	3	132	0.1963	0.162771	0	0	1	1	0	Androgen receptor agonist	AR	-0.4663	0.8144	-1.4036
CPC009_VCAP_24H:BRD-K51302260-001-03-2:10	BRD-K51302260	KU-C103871	VCAP	trt_cp	10 uM	24 h	4	136	0.2	0.166769	1	0	1	1	0	GSP agonist	SMAD3	-0.4662	0.8137	-1.4034
REP.B027_HEK293_24H:A23	BRD-K92723993	imatinib	HEK293	trt_cp	0.03 uM	24 h	2	124	0.1385	0.132515	1	0	1	1	0	PDGFR inhibitor|Bcr-Abl inhibitor|KIT inhibitor	ABL1|KIT|PDGFRA|BCR|CSF1R|PDGFRB|ABCG2|CYP2C19|CYP2C8|CYP3A5|DDR1|NTRK1|RET	-0.4662	0.8109	-1.4033
REP.B023_HA1E_24H:M02	BRD-K71603915	EVP-6124	HA1E	trt_cp	0.74 uM	24 h	2	74	0.1521	0.107278	1	1	1	1	0	Acetylcholine receptor agonist	CHRNA7	-0.4661	0.8099	-1.4031
CPC015_HT29_6H:BRD-A16332958-001-04-0:10	BRD-A16332958	modafinil	HT29	trt_cp	10 uM	6 h	3	70	0.16	0.107014	1	0	1	1	0	Adrenergic receptor agonist	SLC6A3|CYP1A2|CYP2B6|CYP2C19|CYP3A4|CYP3A5|ADRA1B	-0.4661	0.8099	-1.4031
CPC012_A375_6H:B23	BRD-A67438293	treprostinil	A375	trt_cp	10 uM	6 h	5	165	0.1705	0.169603	0	0	1	1	0	Prostacyclin analog	PTGIR	-0.4661	0.8099	-1.403
REP.B009_HELA_24H:H01	BRD-K30685142	levothyroxine	HELA	trt_cp	2.22 uM	24 h	2	84	0.1061	0.0954614	0	0	1	1	0	Thyroid hormone stimulant	THRA|THRB	-0.466	0.8099	-1.4028
CPD003_MCF7_24H:L07	BRD-A65797496	deptropine	MCF7	trt_cp	10 uM	24 h	3	162	0.0748	0.111311	1	0	1	1	0	Histamine receptor antagonist	HRH1	-0.466	0.8099	-1.4027
REP.B012_PC3_24H:E03	BRD-K00674894	orteronel	PC3	trt_cp	0.25 uM	24 h	2	61	0.254	0.125867	0	0	1	1	0	Androgen receptor antagonist|Cytochrome P450 inhibitor	CYP17A1	-0.4659	0.8099	-1.4026
CPC006_HEPG2_6H:BRD-A09533288-003-20-5:10	BRD-A09533288	verapamil	HEPG2	trt_cp	10 uM	6 h	3	241	0.47	0.34032	1	1	1	1	0	Calcium channel blocker	CACNA1C|CACNA1D|CACNA1G|CACNA1S|CYP2C8|CYP2E1|CYP3A5|CYP3A7|DRD2|CACNA1A|CACNA1B|CACNA1F|CACNA1I|CACNB1|CACNB2|CACNB3|CACNB4|CYP3A4|KCNA10|KCNA7|KCNH2|KCNJ11|NALCN|SCN5A|SLC29A4|SLC6A4	-0.4659	0.8099	-1.4025
REP.B011_HUVEC.A_24H:E08	BRD-K05236810	luteolin	HUVEC	trt_cp	0.74 uM	24 h	2	104	0.0316	0.0579683	0	0	1	1	0	Glucosidase inhibitor	AKR1B1|GAA|MAOA|XDH|TOP1	-0.4659	0.8099	-1.4024
REP.A026_A549_24H:E12	BRD-A89164055	sorbinil	A549	trt_cp	0.04 uM	24 h	2	80	0.1697	0.117819	0	0	1	1	0	Aldose reductase inhibitor	AKR1B1	-0.4659	0.8099	-1.4024
CPC015_NPC_24H:BRD-A02180903-001-03-7:10	BRD-A02180903	betamethasone	NPC	trt_cp	10 uM	24 h	4	105	0.16	0.131065	0	0	1	1	0	Glucocorticoid receptor agonist	NR3C1	-0.4658	0.8099	-1.4023
REP.A024_MCF10A_24H:A18	BRD-A73556557	tagatose	MCF10A	trt_cp	0.04 uM	24 h	3	195	0.5173	0.321158	1	0	1	1	0	Phospholipase inhibitor	PYGL	-0.4658	0.8099	-1.4023
CPC020_HCC515_6H:BRD-K47679368-001-01-5:10	BRD-K47679368	bromfenac	HCC515	trt_cp	10 uM	6 h	2	132	0.24	0.17998	1	1	1	1	0	Cyclooxygenase inhibitor	PTGS1|PTGS2	-0.4658	0.8099	-1.4023
PAC004_U2OS_6H:BRD-K02404261-001-02-7:10	BRD-K02404261	caffeine	U2OS	trt_cp	10 uM	6 h	2	64	0.32	0.144709	1	1	1	1	0	Adenosine receptor antagonist|Phosphodiesterase inhibitor	ADORA1|ADORA2A|ADORA2B|ATM|ITPR1|RYR1|ATR|ADORA3|ITPR2|ITPR3|PDE10A|PDE11A|PDE1A|PDE1B|PDE1C|PDE2A|PDE3A|PDE3B|PDE4A|PDE4B|PDE4C|PDE4D|PDE5A|PDE6A|PDE6B|PDE6C|PDE7A|PDE7B|PDE8A|PDE8B|PDE9A|PIK3CA|PIK3CB|PIK3CD|PRKDC|RYR2|RYR3	-0.4658	0.8099	-1.4021
CPC006_HT29_24H:BRD-K39503511-001-02-1:80	BRD-K39503511	quiflapon	HT29	trt_cp	80 uM	24 h	4	134	0.32	0.209391	1	1	1	1	0	Leukotriene inhibitor	ALOX5AP|ALOX5	-0.4658	0.8099	-1.4021
CPC006_HCC515_24H:H01	BRD-K12762134	XAV-939	HCC515	trt_cp	12 uM	24 h	5	240	0.2774	0.260909	1	0	1	1	0	Tankyrase inhibitor	TNKS|TNKS2	-0.4657	0.8099	-1.402
REP.A028_HT29_24H:C16	BRD-K92984783	melperone	HT29	trt_cp	0.37 uM	24 h	2	101	0.1984	0.14314	0	0	1	1	0	Dopamine receptor antagonist|Serotonin receptor antagonist	DRD2|HTR1A|HTR2A	-0.4657	0.8099	-1.4019
REP.A021_MCF10A_24H:G19	BRD-K82967685	mirodenafil	MCF10A	trt_cp	10 uM	24 h	2	82	0.2381	0.141292	1	1	1	1	0	Phosphodiesterase inhibitor	PDE5A	-0.4657	0.8099	-1.4018
REP.A009_HEK293_24H:I13	BRD-K31092604	donitriptan	HEK293	trt_cp	10 uM	24 h	3	105	0.2987	0.179078	1	1	1	1	0	Serotonin receptor agonist	HTR1B|HTR1D|HTR1A|HTR1E|HTR1F|HTR2A|HTR5A|HTR6	-0.4656	0.8095	-1.4014
CPC013_HCC515_6H:BRD-K15600710-066-01-7:10	BRD-K15600710	obatoclax	HCC515	trt_cp	10 uM	6 h	3	169	0.45	0.278856	1	1	1	1	0	BCL inhibitor	BCL2|BCL2L1|MCL1	-0.4656	0.8095	-1.4014
REP.A020_MCF10A_24H:C08	BRD-K84564571	telatinib	MCF10A	trt_cp	3.33 uM	24 h	3	99	0.104	0.102604	0	0	1	1	0	KIT inhibitor|PDGFR inhibitor|VEGFR inhibitor	KDR|FLT4|KIT|PDGFRB	-0.4655	0.8085	-1.4013
CPC001_VCAP_24H:H19	BRD-K07325606	hispidin	VCAP	trt_cp	10 uM	24 h	5	202	0.3421	0.265817	0	0	1	1	0	PKC inhibitor	PRKCB	-0.4655	0.8087	-1.4013
REP.B007_HELA_24H:I21	BRD-K52989797	clomipramine	HELA	trt_cp	0.25 uM	24 h	2	95	0.349	0.184122	0	0	1	1	0	Serotonin receptor antagonist	SLC6A4|SLC6A2|CYP2C19|GSTP1|HTR2A|HTR2B|HTR2C|SLC6A3	-0.4655	0.8077	-1.4012
CPC016_NEU_24H:BRD-K98521173-001-03-8:10	BRD-K98521173	desoxycortone	NEU	trt_cp	10 uM	24 h	3	248	0.28	0.266462	0	0	1	1	0	Mineralocorticoid receptor agonist	NR3C2|NR3C1	-0.4655	0.8062	-1.4011
LJP002_MCF10A_24H:BRD-K56301217-001-03-3:0.08	BRD-K56301217	ABT-737	MCF10A	trt_cp	0.08 uM	24 h	2	60	0.3	0.135665	0	0	1	1	0	BCL inhibitor	BCL2|BCL2L1|BCL2L2	-0.4654	0.804	-1.401
REP.B021_HT29_24H:L23	BRD-K84892605	IOWH-032	HT29	trt_cp	0.03 uM	24 h	2	73	0.1936	0.120211	1	1	1	1	0	CFTR channel antagonist	CFTR	-0.4653	0.803	-1.4008
CPC011_PC3_6H:BRD-K88304388-045-14-6:10	BRD-K88304388	dextrorphan	PC3	trt_cp	10 uM	6 h	4	175	0.2	0.189175	1	0	1	1	0	Glutamate receptor antagonist	OPRM1|OPRK1|OPRD1	-0.4654	0.8033	-1.4008
REP.B009_HA1E_24H:E12	BRD-K29530284	amlexanox	HA1E	trt_cp	0.01 uM	24 h	2	100	0.1706	0.132075	1	1	1	1	0	Histamine receptor antagonist	FGF1|IL3|PDE4A|PDE4B|PDE4C|PDE4D|S100A12|S100A13	-0.4654	0.8034	-1.4008
REP.B017_A549_24H:M18	BRD-A61793559	metolazone	A549	trt_cp	0.01 uM	24 h	2	37	0.118	0.0668148	1	0	1	1	0	Carbonic anhydrase inhibitor	SLC12A3|CA2|CA7	-0.4653	0.8012	-1.4007
CPC018_A375_6H:BRD-K01095011-001-03-5:10	BRD-K01095011	finasteride	A375	trt_cp	10 uM	6 h	5	94	0.13	0.111781	0	0	1	1	0	5-alpha reductase inhibitor	SRD5A2|SRD5A1|AR|AKR1D1	-0.4653	0.8012	-1.4006
REP.A003_PC3_24H:D20	BRD-K32101625	LX-1031	PC3	trt_cp	3.33 uM	24 h	3	78	0.2353	0.13699	1	0	1	1	0	Tryptophan hydroxylase inhibitor	TPH1	-0.4653	0.8012	-1.4006
ASG003_U2OS_6H:F14	BRD-K67868012	PI-103	U2OS	trt_cp	1.11 uM	6 h	5	262	0.5001	0.366024	0	0	1	1	0	PI3K inhibitor|MTOR inhibitor	PIK3CA|PIK3CG|MTOR|PIK3CB|PIK3CD|PRKDC	-0.4652	0.8012	-1.4005
MOAR001_A375_24H:J06	BRD-K06854232	AM-580	A375	trt_cp	1.11 uM	24 h	2	86	0.0462	0.0637383	1	1	1	1	0	Retinoid receptor agonist	RARA	-0.4653	0.8012	-1.4005
REP.A025_JURKAT_24H:O24	BRD-K73381542	phenylephrine	JURKAT	trt_cp	0.04 uM	24 h	2	103	0.2199	0.152181	0	0	1	1	0	Adrenergic receptor agonist	ADRA1A|ADRA1B|ADRA1D	-0.4652	0.8012	-1.4004
PAC002_U2OS_6H:BRD-K48735772-001-01-4:10	BRD-K48735772	PD-158780	U2OS	trt_cp	10 uM	6 h	2	132	0.36	0.220429	0	0	1	1	0	EGFR inhibitor	EGFR	-0.4652	0.8012	-1.4003
REP.B007_PC3_24H:D11	BRD-K44366189	anacetrapib	PC3	trt_cp	0.03 uM	24 h	2	76	0.1918	0.122085	1	1	1	1	0	Cholesterol inhibitor	CETP	-0.4652	0.8012	-1.4002
CPC014_PC3_24H:BRD-K50720187-050-04-1:10	BRD-K50720187	flupirtine	PC3	trt_cp	10 uM	24 h	5	261	0.11	0.171335	0	0	1	1	0	Glutamate receptor antagonist	KCNQ2|KCNQ3|ADRA2A|KCNQ1	-0.4652	0.8012	-1.4002
CPC003_HCC515_24H:BRD-K32584078-001-02-3:10	BRD-K32584078	BML-257	HCC515	trt_cp	10 uM	24 h	3	96	0.12	0.108532	1	0	1	1	0	AKT inhibitor|HCV inhibitor	AKT1	-0.4651	0.801	-1.4001
REP.A021_HUVEC.A_24H:G01	BRD-K82767007	dazoxiben	HUVEC	trt_cp	10 uM	24 h	2	111	0.1152	0.114345	1	1	1	1	0	Thromboxane synthase inhibitor	TBXAS1	-0.4651	0.8012	-1.4001
MOAR001_A375_24H:C01	BRD-K03319035	maprotiline	A375	trt_cp	10 uM	24 h	2	259	0.5612	0.385513	1	1	1	1	0	Norepinephrine reuptake inhibitor|Tricyclic antidepressant	SLC6A2|ADRA1A|ADRA1B|ADRA1D|ADRA2A|ADRA2B|ADRA2C|CHRM1|CHRM2|CHRM3|CHRM4|CHRM5|DRD2|HRH1|HTR2A|HTR2C|HTR7	-0.4651	0.8012	-1.4001
CPC017_HEPG2_6H:BRD-A68281735-001-02-0:10	BRD-A68281735	REV-5901	HEPG2	trt_cp	10 uM	6 h	3	197	0.29	0.241692	1	1	1	1	0	Leukotriene receptor antagonist|Lipoxygenase inhibitor	ALOX5	-0.4651	0.7988	-1.4
LJP009_SKL.C_24H:G07	BRD-A37704979	SB-203580	SKL	trt_cp	10 uM	24 h	3	133	0.4128	0.236933	1	1	1	1	0	P38 MAPK inhibitor	MAPK14|MAPK1|MAPK11|AKT1|ALOX5|CHEK1|CYP2D6|CYP3A4|GAK|GSK3B|LCK|MAPK10|MAPK12|MAPK8|MAPK9|PRKCA|RAF1|RIPK2|ROCK1|RPS6KB1|SGK1|SRC|TNF	-0.465	0.7988	-1.3999
CPC016_SKB_24H:BRD-K84266862-001-01-6:10	BRD-K84266862	BRL-50481	SKB	trt_cp	10 uM	24 h	3	48	0.21	0.101522	1	0	1	1	0	Phosphodiesterase inhibitor	PDE7A|PDE7B	-0.465	0.7988	-1.3998
REP.B024_HA1E_24H:E06	BRD-K74763371	bosentan	HA1E	trt_cp	0.01 uM	24 h	2	52	0.1149	0.0781614	1	1	1	1	0	Endothelin receptor antagonist	EDNRB|EDNRA|ABCB1|CYP2C19|CYP3A4	-0.465	0.7988	-1.3998
CPC006_A549_6H:BRD-K41895714-001-02-2:10	BRD-K41895714	AS-605240	A549	trt_cp	10 uM	6 h	4	240	0.42	0.321041	1	1	1	1	0	PI3K inhibitor	PIK3CG	-0.465	0.7988	-1.3997
CPC017_SKB_24H:BRD-A44008656-036-15-9:10	BRD-A44008656	doxylamine	SKB	trt_cp	10 uM	24 h	2	132	0.23	0.17619	0	0	1	1	0	Histamine receptor antagonist	HRH1|CHRM1	-0.465	0.7988	-1.3997
CPC013_SKB_24H:BRD-K11663430-001-01-5:10	BRD-K11663430	pyroxamide	SKB	trt_cp	10 uM	24 h	4	220	0.47	0.325155	0	0	1	1	0	HDAC inhibitor	HDAC1	-0.4649	0.7988	-1.3995
REP.A028_A549_24H:J12	BRD-K95237249	probenecid	A549	trt_cp	0.04 uM	24 h	3	100	0.0583	0.0772085	0	0	1	1	0	Uricosuric	SLC22A6|SLC22A11|SLC22A8|ABCC1|TRPV2|PANX1|SLCO1C1	-0.4649	0.7988	-1.3994
CPC018_MCF7_6H:BRD-K17796732-001-02-0:10	BRD-K17796732	JWH-015	MCF7	trt_cp	10 uM	6 h	3	121	0.18	0.149231	1	0	1	1	0	Cannabinoid receptor agonist	CNR2	-0.4649	0.7988	-1.3994
REP.A024_A375_24H:L07	BRD-K77947974	fluspirilene	A375	trt_cp	10 uM	24 h	3	375	0.462	0.420889	1	1	1	1	0	Dopamine receptor antagonist	DRD2|HTR2A|CACNG1|HRH1|HTR1A|HTR1D|HTR1E	-0.4649	0.7988	-1.3993
CPC002_HA1E_6H:BRD-K06147391-300-04-3:10	BRD-K06147391	telenzepine	HA1E	trt_cp	10 uM	6 h	3	94	0.18	0.131532	1	0	1	1	0	Acetylcholine receptor antagonist	CHRM1	-0.4649	0.7988	-1.3993
CPD002_PC3_24H:BRD-K04111260-001-07-6:10	BRD-K04111260	raclopride	PC3	trt_cp	10 uM	24 h	3	150	0.28	0.207231	1	1	1	1	0	Dopamine receptor antagonist	DRD2|DRD3|HTR1A	-0.4648	0.7988	-1.3992
CEGS001_NPC.215_24H:J24	BRD-K18855837	varenicline	NPC	trt_cp	0.74 uM	24 h	3	55	0.29	0.127706	1	1	1	1	0	Acetylcholine receptor agonist	CHRNA4|CHRNB2|CHRNA3|CHRNA6|CHRNA7	-0.4648	0.7988	-1.3992
REP.B019_A375_24H:J19	BRD-A48570745	ivermectin	A375	trt_cp	2.22 uM	24 h	2	90	0.2938	0.164429	1	1	1	1	0	GABA receptor agonist	CHRNA7|GABRB3|GLRA3|P2RX7	-0.4648	0.7988	-1.3991
REP.A002_HT29_24H:D07	BRD-K16077845	fentiazac	HT29	trt_cp	10 uM	24 h	3	163	0.3494	0.241316	0	0	1	1	0	Cyclooxygenase inhibitor	PTGS1|PTGS2	-0.4647	0.7988	-1.399
CVD001_HEPG2_6H:BRD-K63750851-001-05-8:10	BRD-K63750851	BRD-K63750851	HEPG2	trt_cp	10 uM	6 h	3	204	0.47	0.313108	1	1	1	1	0	Dehydrogenase inhibitor|Inositol monophosphatase inhibitor	IMPDH1|IMPDH2	-0.4647	0.7988	-1.3989
CPC005_HT29_6H:BRD-K81376179-001-01-4:10	BRD-K81376179	TCS-359	HT29	trt_cp	10 uM	6 h	3	51	0.14	0.0854436	1	1	1	1	0	FLT3 inhibitor	FLT3	-0.4647	0.7988	-1.3989
CPC005_A375_6H:BRD-K64746805-001-02-9:10	BRD-K64746805	MBCQ	A375	trt_cp	10 uM	6 h	3	150	0.31	0.21805	1	1	1	1	0	Phosphodiesterase inhibitor	PDE5A	-0.4647	0.7988	-1.3988
CPC013_NEU_24H:BRD-K45044657-001-01-4:10	BRD-K45044657	TC-H-106	NEU	trt_cp	10 uM	24 h	2	126	0.22	0.168355	0	0	1	1	0	HDAC inhibitor	HDAC1|HDAC2|HDAC3|HDAC8	-0.4646	0.7988	-1.3987
REP.B028_HA1E_24H:P17	BRD-K97472745	gestrinone	HA1E	trt_cp	0.03 uM	24 h	2	80	0.1283	0.102445	1	1	1	1	0	Progesterone receptor antagonist	PGR|AR|ESR1	-0.4646	0.7988	-1.3986
REP.B013_THP1_24H:H11	BRD-A40639672	ketorolac	THP1	trt_cp	0.03 uM	24 h	2	137	0.3119	0.209025	1	0	1	1	0	Cyclooxygenase inhibitor	PTGS1|PTGS2	-0.4646	0.7988	-1.3986
REP.A003_A375_24H:D24	BRD-K32101625	LX-1031	A375	trt_cp	0.04 uM	24 h	3	98	0.1935	0.139246	1	1	1	1	0	Tryptophan hydroxylase inhibitor	TPH1	-0.4646	0.7988	-1.3985
CPC002_VCAP_24H:BRD-K45435259-003-03-8:10	BRD-K45435259	SCH-23390	VCAP	trt_cp	10 uM	24 h	3	174	0.44	0.27979	1	0	1	1	0	Dopamine receptor antagonist	DRD1|DRD5|HTR2C|KCNJ4|KCNJ6	-0.4645	0.7988	-1.3984
REP.B008_HELA_24H:M20	BRD-K88807631	elacridar	HELA	trt_cp	0.74 uM	24 h	2	70	0.1616	0.107547	0	0	1	1	0	P-glycoprotein inhibitor	ABCB1	-0.4646	0.7988	-1.3984
REP.A024_PC3_24H:B13	BRD-A20239487	BRD-A20239487	PC3	trt_cp	10 uM	24 h	3	92	0.2	0.137164	1	1	1	1	0	Adrenergic receptor antagonist	ADRB1|ADRB2	-0.4646	0.7988	-1.3984
CPC006_NCIH2073_6H:BRD-K89732114-001-05-9:10	BRD-K89732114	trifluoperazine	NCIH2073	trt_cp	10 uM	6 h	2	115	0.17	0.141385	0	0	1	1	0	Dopamine receptor antagonist	DRD2|ABCG2|CAMK2A|SCN4A|SCN9A|ADRA1A|CALM1|CALY|DRD4|HRH1|HTR2A|HTR2C|S100A4|TNNC1	-0.4645	0.7987	-1.3982
LJP009_MCF10A_24H:I24	BRD-K11267252	alectinib	MCF10A	trt_cp	0.04 uM	24 h	2	37	0.232	0.0936862	0	0	1	1	0	ALK inhibitor	ALK|MET	-0.4645	0.7988	-1.3982
REP.B023_HELA_24H:A15	BRD-K67966701	lisinopril	HELA	trt_cp	0.25 uM	24 h	2	76	0.2917	0.150559	1	1	1	1	0	ACE inhibitor	ACE|ACE2	-0.4644	0.7985	-1.3981
NMH002_NPC_6H:BRD-K54330070-001-12-1:10	BRD-K54330070	SB-202190	NPC	trt_cp	10 uM	6 h	3	105	0.21	0.150153	1	1	1	1	0	P38 MAPK inhibitor	MAPK14|AKT1|ALOX5|CHEK1|GSK3B|LCK|MAPK1|MAPK11|MAPK12|MAPK8|PRKCA|ROCK1|RPS6KB1|SGK1	-0.4645	0.7987	-1.3981
CPC005_PC3_6H:BRD-A53077924-236-01-4:10	BRD-A53077924	tianeptine	PC3	trt_cp	10 uM	6 h	4	106	0.12	0.114044	1	0	1	1	0	Selective serotonin reuptake inhibitor (SSRI)	SLC6A4|OPRD1|OPRK1|OPRM1	-0.4644	0.7983	-1.398
REP.A014_HEK293_24H:C09	BRD-K56751279	Y-39983	HEK293	trt_cp	1.11 uM	24 h	3	147	0.2222	0.182752	0	0	1	1	0	Rho associated kinase inhibitor	ROCK1|ROCK2	-0.4644	0.7984	-1.398
REP.A007_HELA_24H:I01	BRD-K52172416	anastrozole	HELA	trt_cp	10 uM	24 h	3	96	0.2955	0.170312	1	1	1	1	0	Aromatase inhibitor	CYP19A1	-0.4644	0.798	-1.3978
REP.A017_PC3_24H:E07	BRD-K62387885	basimglurant	PC3	trt_cp	10 uM	24 h	3	367	0.5669	0.461229	1	1	1	1	0	Glutamate receptor antagonist	GRM5	-0.4643	0.7979	-1.3977
REP.A006_HELA_24H:P10	BRD-K24219278	amineptine	HELA	trt_cp	0.37 uM	24 h	3	88	0.1761	0.125879	0	0	1	1	0	Dopamine receptor agonist	SLC6A2|SLC6A4	-0.4643	0.7977	-1.3976
CPC018_NPC_24H:BRD-K48367671-001-01-8:10	BRD-K48367671	febuxostat	NPC	trt_cp	10 uM	24 h	3	211	0.28	0.245782	0	0	1	1	0	Xanthine oxidase inhibitor	XDH	-0.4642	0.7977	-1.3974
CPC004_HEPG2_6H:BRD-A93236127-001-03-7:10	BRD-A93236127	digitoxin	HEPG2	trt_cp	10 uM	6 h	3	220	0.47	0.325155	1	1	1	1	0	Na/K-ATPase inhibitor	ATP1A1	-0.4642	0.7977	-1.3974
CPC014_PHH_24H:BRD-K84937637-001-03-2:10	BRD-K84937637	sirolimus	PHH	trt_cp	10 uM	24 h	3	185	0.28	0.230142	0	0	1	1	0	MTOR inhibitor	MTOR|FKBP1A|CCR5|FGF2	-0.4641	0.7972	-1.397
REP.B018_A375_24H:J11	BRD-K64800655	PHA-793887	A375	trt_cp	0.03 uM	24 h	2	70	0.3012	0.146827	1	1	1	1	0	CDK inhibitor	CDK1|CDK2|CDK4|CDK5|CCND1|CCNE1|CDK7|CDK9	-0.4641	0.7971	-1.3969
REP.A012_HT29_24H:C13	BRD-K00610438	altanserin	HT29	trt_cp	10 uM	24 h	2	93	0.2354	0.149615	0	0	1	1	0	Serotonin receptor antagonist	HTR2A|HTR2C	-0.464	0.7967	-1.3968
CPC002_PC3_6H:BRD-K05361803-001-02-1:10	BRD-K05361803	SC-10	PC3	trt_cp	10 uM	6 h	5	52	0.04	0.0461171	1	0	1	1	0	Protein kinase activator	PRKCA	-0.464	0.7965	-1.3967
CPC005_PC3_24H:BRD-A46186775-369-01-2:10	BRD-A46186775	hydrocortisone-phosphate	PC3	trt_cp	10 uM	24 h	5	174	0.3	0.231029	1	1	1	1	0	Glucocorticoid receptor agonist	ANXA1|NOS2|NR3C1	-0.464	0.7963	-1.3966
REP.B010_HT29_24H:C14	BRD-K12737986	veliparib	HT29	trt_cp	0.74 uM	24 h	2	66	0.0591	0.0631533	1	1	1	1	0	PARP inhibitor	PARP1|PARP2	-0.464	0.7963	-1.3966
REP.A002_HELA_24H:E13	BRD-K16508793	diazepam	HELA	trt_cp	10 uM	24 h	3	111	0.3378	0.195804	1	1	1	1	0	Benzodiazepine receptor agonist	GABRA1|GABRA2|GABRA3|GABRA5|GABRA4|GABRA6|GABRB1|GABRB2|GABRB3|GABRD|GABRE|GABRG1|GABRG2|GABRG3|GABRP|GABRQ|CYP2C19|ADRA1A|GABRR1|GABRR2|GABRR3|TSPO	-0.4639	0.7963	-1.3965
REP.A004_YAPC_24H:H08	BRD-A22032524	amlodipine	YAPC	trt_cp	3.33 uM	24 h	3	97	0.2078	0.143562	0	0	1	1	0	Calcium channel blocker	CACNA1C|CACNA1D|CACNA1S|CACNA2D1|ABCG2|CA1|CACNA1B|CACNA1F|CACNA2D3|CACNB1|CACNB2|SMPD1	-0.4638	0.7963	-1.3963
REP.A013_A549_24H:K02	BRD-K41783120	STA-5326	A549	trt_cp	3.33 uM	24 h	3	276	0.49	0.371863	1	1	1	1	0	Interleukin inhibitor	IL12A|IL12B|IL12RB1|IL12RB2|IL23A	-0.4638	0.7963	-1.3961
CPC015_A375_6H:BRD-K09859624-004-03-9:10	BRD-K09859624	methantheline	A375	trt_cp	10 uM	6 h	3	58	0.09	0.0730577	1	0	1	1	0	Acetylcholine receptor antagonist	CHRM1|HRH2	-0.4637	0.7963	-1.3959
REP.A019_HT29_24H:K02	BRD-K48894757	laropiprant	HT29	trt_cp	3.33 uM	24 h	3	104	0.2329	0.157374	0	0	1	1	0	Prostanoid receptor antagonist	PTGDR|PTGDR2|PTGER1|PTGER2|PTGER3|PTGFR|PTGIR|TBXA2R	-0.4637	0.7963	-1.3959
CPC018_MCF7_24H:BRD-K76304753-003-08-8:10	BRD-K76304753	phenazopyridine	MCF7	trt_cp	10 uM	24 h	4	151	0.25	0.196467	1	1	1	1	0	Anesthetic - local	SCN1A	-0.4637	0.7963	-1.3959
LJP008_SHSY5Y_24H:M18	BRD-K79254416	decitabine	SHSY5Y	trt_cp	0.04 uM	24 h	2	83	0.3698	0.177155	1	1	1	1	0	DNA inhibitor	DNMT1|DNMT3A	-0.4637	0.7963	-1.3959
REP.A010_HELA_24H:G05	BRD-A13133631	BRD-A13133631	HELA	trt_cp	0.125 uM	24 h	3	238	0.5543	0.367275	0	0	1	1	0	Glucocorticoid receptor agonist	NR3C1	-0.4637	0.7963	-1.3958
REP.A025_A549_24H:N01	BRD-K78118466	LY-2157299	A549	trt_cp	10 uM	24 h	2	111	0.2115	0.154934	0	0	1	1	0	TGF-beta receptor inhibitor	TGFBR1	-0.4636	0.7963	-1.3957
REP.B024_A549_24H:K17	BRD-K78010432	furosemide	A549	trt_cp	0.03 uM	24 h	2	264	0.5051	0.369251	1	1	1	1	0	Diuretic	SLC12A1|SLC12A2|CA2|GPR35	-0.4636	0.7963	-1.3957
REP.B022_YAPC_24H:M14	BRD-K72414522	AZD-5438	YAPC	trt_cp	0.74 uM	24 h	2	334	0.5455	0.43162	1	1	1	1	0	CDK inhibitor	CCNB1|CCNE1|CDK1|CDK2|KCNH2	-0.4637	0.7963	-1.3957
CPC017_HT29_6H:BRD-K67013324-001-01-5:10	BRD-K67013324	luzindole	HT29	trt_cp	10 uM	6 h	5	173	0.08	0.118959	0	0	1	1	0	Melatonin receptor antagonist	MTNR1B|MTNR1A	-0.4637	0.7963	-1.3957
REP.B004_A549_24H:L18	BRD-K20920669	cromoglicic-acid	A549	trt_cp	0.01 uM	24 h	2	112	0.346	0.199057	0	0	1	1	0	Immunosuppressant	KCNMA1|S100P	-0.4636	0.7963	-1.3956
LPROT003_A549_6H:BRD-A34255068:1	BRD-A34255068	rolipram	A549	trt_cp	1.11 uM	6 h	3	60	0.16	0.0990755	1	1	1	1	0	Phosphodiesterase inhibitor	PDE4A|PDE4B|PDE4D|PDE4C	-0.4636	0.7963	-1.3954
LKCP001_U2OS_24H:J16	BRD-A03249105	fulvestrant	U2OS	trt_cp	10 uM	24 h	5	111	0.153	0.131776	1	1	1	1	0	Estrogen receptor antagonist	ESR1|EPHX2|ESR2|GPER1	-0.4636	0.7963	-1.3954
CPC016_HEPG2_6H:BRD-K41337261-003-01-0:10	BRD-K41337261	ZM-306416	HEPG2	trt_cp	10 uM	6 h	3	177	0.34	0.24806	1	0	1	1	0	Abl inhibitor|Src inhibitor|VEGFR inhibitor	FLT1|KDR|EGFR|FLT4	-0.4635	0.7963	-1.3953
REP.B026_MCF7_24H:L17	BRD-K92041145	O6-benzylguanine	MCF7	trt_cp	0.03 uM	24 h	2	45	0.1272	0.0765033	1	0	1	1	0	O6-alkylguanine-DNA alkyltransferase inhibitor	MGMT	-0.4635	0.7963	-1.3953
REP.A002_YAPC_24H:D22	BRD-K16295392	atrasentan	YAPC	trt_cp	0.37 uM	24 h	2	108	0.1608	0.133256	0	0	1	1	0	Endothelin receptor antagonist	EDNRA	-0.4635	0.7962	-1.3952
CPC016_MCF7_24H:BRD-K80778372-001-01-7:10	BRD-K80778372	Ro-19-4605	MCF7	trt_cp	10 uM	24 h	4	79	0.07	0.0751957	1	0	1	1	0	GABA receptor agonist	GABRA1|GABRA2|GABRA3|GABRA5	-0.4634	0.7958	-1.395
CPC020_VCAP_24H:BRD-K08806317-001-02-1:10	BRD-K08806317	timolol	VCAP	trt_cp	10 uM	24 h	5	204	0.38	0.281538	1	1	1	1	0	Adrenergic receptor antagonist	ADRB2|ADRB1	-0.4634	0.795	-1.3949
CPC004_VCAP_24H:N01	BRD-K26801045	pipamperone	VCAP	trt_cp	10 uM	24 h	6	155	0.14	0.148957	0	0	1	1	0	Dopamine receptor antagonist	DRD2|HTR2A|HRH1|HTR1A|HTR1B|HTR1D	-0.4634	0.7952	-1.3949
CPC004_VCAP_24H:D17	BRD-A92826379	lupanine	VCAP	trt_cp	10 uM	24 h	6	377	0.37	0.377661	0	0	1	1	0	Sodium channel inhibitor	INS	-0.4634	0.7953	-1.3949
CPC006_NCIH2073_6H:BRD-K68336408-001-04-2:56.78	BRD-K68336408	BRD-K68336408	NCIH2073	trt_cp	60 uM	6 h	2	246	0.51	0.358165	0	0	1	1	0	EGFR inhibitor	EGFR|MAPK14	-0.4634	0.7948	-1.3948
REP.B014_HELA_24H:G20	BRD-K60341624	GSK-1292263	HELA	trt_cp	0.74 uM	24 h	2	57	0.1569	0.0956268	1	0	1	1	0	Glucose dependent insulinotropic receptor agonist	GPR119|GRPR	-0.4633	0.7947	-1.3947
PAC011_U2OS_6H:BRD-K43797669-001-10-6:20	BRD-K43797669	genistein	U2OS	trt_cp	20 uM	6 h	3	100	0.35	0.189175	1	1	1	1	0	Tyrosine kinase inhibitor	CFTR|ESR2|EGFR|ESR1|ESRRA|ESRRB|ESRRG|NCOA1|NCOA2|PPARG|PTK2B|TOP2A|TRPC5	-0.4633	0.7948	-1.3947
CPC006_H1299_6H:BRD-K78959463-001-05-8:10	BRD-K78959463	FPL-64176	H1299	trt_cp	10 uM	6 h	2	88	0.41	0.192072	0	0	1	1	0	Calcium channel activator	CACNA1C|CACNA1S	-0.4633	0.7945	-1.3946
REP.B008_MCF7_24H:N01	BRD-A87983072	benzotript	MCF7	trt_cp	2.22 uM	24 h	2	125	0.2205	0.167876	1	1	1	1	0	CCK receptor antagonist	CCKBR|CCKAR	-0.4633	0.794	-1.3945
CPC018_HT29_6H:BRD-K87919739-001-03-4:10	BRD-K87919739	BRD-K87919739	HT29	trt_cp	10 uM	6 h	5	140	0.09	0.113505	1	0	1	1	0	Receptor tyrosine protein kinase inhibitor	ERBB2	-0.4632	0.7911	-1.3944
REP.A009_HEK293_24H:G19	BRD-K26667523	TAK-733	HEK293	trt_cp	10 uM	24 h	3	139	0.2026	0.169691	1	1	1	1	0	MEK inhibitor	MAP2K1	-0.4631	0.7898	-1.3942
LJP008_PC3_24H:P13	BRD-K14109347	LY-2603618	PC3	trt_cp	10 uM	24 h	2	59	0.2923	0.132792	1	1	1	1	0	CHK inhibitor	CHEK1	-0.4631	0.7896	-1.3941
LKCP001_A549_6H:J01	BRD-K68870568	flumatinib	A549	trt_cp	10 uM	6 h	4	207	0.3178	0.259354	1	1	1	1	0	Bcr-Abl inhibitor	ABL1|BCR|PDGFRB	-0.463	0.7894	-1.3939
REP.A023_A375_24H:N23	BRD-K72166146	BRD-K72166146	A375	trt_cp	0.125 uM	24 h	3	76	0.1922	0.122212	1	1	1	1	0	Serotonin receptor agonist	HTR1D|HTR1B|ADRA2A|DRD2|HTR1E|HTR1F|HTR2B|HTR7	-0.4631	0.7894	-1.3939
LJP001_MDAMB231_24H:BRD-K25311561-001-05-7:10	BRD-K25311561	KU-55933	MDAMB231	trt_cp	10 uM	24 h	4	129	0.22	0.170348	1	0	1	1	0	ATM kinase inhibitor	ATM|PRKDC	-0.4631	0.7894	-1.3939
CPC017_MCF7_6H:BRD-K71499074-001-03-8:10	BRD-K71499074	diclofenamide	MCF7	trt_cp	10 uM	6 h	4	91	0.24	0.149437	1	0	1	1	0	Carbonic anhydrase inhibitor	CA1|CA2|CA4|CA12|CA7	-0.463	0.7894	-1.3938
REP.A015_THP1_24H:N01	BRD-K59715032	pasireotide	THP1	trt_cp	10 uM	24 h	2	169	0.3324	0.239665	1	1	1	1	0	Somatostatin receptor agonist	SSTR1|SSTR2|SSTR3|SSTR5|GH1	-0.463	0.7894	-1.3937
CPC006_HEPG2_6H:BRD-K68997413-001-01-0:10	BRD-K68997413	PF-3845	HEPG2	trt_cp	10 uM	6 h	3	216	0.32	0.265847	1	1	1	1	0	FAAH inhibitor	FAAH	-0.4629	0.7894	-1.3936
CPC001_HA1E_24H:BRD-K56699285-001-04-5:10	BRD-K56699285	metergoline	HA1E	trt_cp	10 uM	24 h	3	150	0.29	0.210899	1	1	1	1	0	Dopamine receptor agonist|Serotonin receptor antagonist	HTR2A|DRD2|HTR1A|HTR1B|HTR1D|HTR1E|HTR1F|HTR2B|HTR2C|HTR5A|HTR6|HTR7	-0.463	0.7894	-1.3936
CPC005_VCAP_24H:BRD-K42095107-001-08-0:10	BRD-K42095107	daidzein	VCAP	trt_cp	10 uM	24 h	5	308	0.21	0.257167	0	0	1	1	0	Estrogen receptor agonist	ESRRA|ESRRB|ESRRG|TRPC5	-0.4629	0.7893	-1.3934
CPC007_HCC515_6H:BRD-A82096673-001-04-4:10	BRD-A82096673	KU-C103428N	HCC515	trt_cp	10 uM	6 h	2	162	0.27	0.21148	0	0	1	1	0	CDC inhibitor|Rho associated kinase inhibitor	NFE2	-0.4629	0.7893	-1.3934
CPC016_SKB_24H:BRD-K54330070-001-07-1:10	BRD-K54330070	SB-202190	SKB	trt_cp	10 uM	24 h	3	173	0.35	0.248821	1	1	1	1	0	P38 MAPK inhibitor	MAPK14|AKT1|ALOX5|CHEK1|GSK3B|LCK|MAPK1|MAPK11|MAPK12|MAPK8|PRKCA|ROCK1|RPS6KB1|SGK1	-0.4628	0.7893	-1.3933
CPC006_NOMO1_6H:BRD-K55966568-001-01-3:6	BRD-K55966568	orantinib	NOMO1	trt_cp	6.66 uM	6 h	2	695	0.64	0.674393	1	1	1	1	0	PDGFR inhibitor|FGFR inhibitor|VEGFR inhibitor	KDR|PDGFRB|FGFR1|AURKA|AURKB|PDGFRA|TBK1|EGFR|FGFR2	-0.4629	0.7893	-1.3933
CPC006_HA1E_6H:BRD-K73261812-001-01-1:10	BRD-K73261812	BRD-K73261812	HA1E	trt_cp	10 uM	6 h	5	350	0.48	0.414462	1	1	1	1	0	Beta catenin inhibitor	CTNNB1	-0.4629	0.7893	-1.3933
REP.A016_A375_24H:M16	BRD-K36324071	NF-449	A375	trt_cp	0.37 uM	24 h	3	161	0.2331	0.195891	1	0	1	1	0	Purinergic receptor antagonist	P2RX1	-0.4628	0.7893	-1.3931
CPC006_MCF7_6H:BRD-K68336408-001-04-2:56.78	BRD-K68336408	BRD-K68336408	MCF7	trt_cp	60 uM	6 h	5	396	0.53	0.463251	1	1	1	1	0	EGFR inhibitor	EGFR|MAPK14	-0.4627	0.7891	-1.393
LJP008_YAPC_24H:G02	BRD-K13094524	PFI-1	YAPC	trt_cp	3.33 uM	24 h	2	214	0.6357	0.372961	1	1	1	1	0	Bromodomain inhibitor	BRD4	-0.4627	0.7891	-1.393
REP.B009_MCF10A_24H:L22	BRD-K31476763	AZD-9668	MCF10A	trt_cp	0.08 uM	24 h	2	71	0.2439	0.133066	1	1	1	1	0	Elastase inhibitor	ELANE	-0.4628	0.7892	-1.393
LJP001_MCF7_24H:BRD-K79404599-001-05-1:10	BRD-K79404599	enzastaurin	MCF7	trt_cp	10 uM	24 h	2	83	0.3	0.159562	1	1	1	1	0	PKC inhibitor	PRKCB|AKT1|GSK3B|PRKCA|PRKCD|PRKCG	-0.4628	0.7892	-1.393
CPC013_MCF7_24H:BRD-K16621777-001-01-9:10	BRD-K16621777	enobosarm	MCF7	trt_cp	10 uM	24 h	5	208	0.31	0.256769	0	0	1	1	0	Androgen receptor antagonist	AR	-0.4627	0.7889	-1.3929
REP.A025_YAPC_24H:M14	BRD-K78303961	glycitein	YAPC	trt_cp	3.33 uM	24 h	3	111	0.3394	0.196267	1	0	1	1	0	TNF inhibitor	TNF|APP|IL1B	-0.4627	0.7889	-1.3929
CPC003_VCAP_24H:BRD-K33453211-003-03-2:10	BRD-K33453211	levocabastine	VCAP	trt_cp	10 uM	24 h	2	46	0.11	0.0719293	1	0	1	1	0	Histamine receptor antagonist	HRH1|NTSR2	-0.4627	0.7887	-1.3928
CPC003_HCC515_24H:BRD-K14767410-001-01-5:10	BRD-K14767410	SC-560	HCC515	trt_cp	10 uM	24 h	3	121	0.23	0.168689	1	1	1	1	0	Cyclooxygenase inhibitor	PTGS1	-0.4627	0.7887	-1.3928
CPC006_HEPG2_6H:BRD-K12762134-001-01-3:11.1	BRD-K12762134	XAV-939	HEPG2	trt_cp	12 uM	6 h	3	223	0.21	0.218823	0	0	1	1	0	Tankyrase inhibitor	TNKS|TNKS2	-0.4627	0.7888	-1.3928
PAC003_U2OS_6H:BRD-K33453211-003-03-2:4.37656	BRD-K33453211	levocabastine	U2OS	trt_cp	4 uM	6 h	2	19	0.22	0.0653761	1	0	1	1	0	Histamine receptor antagonist	HRH1|NTSR2	-0.4627	0.7888	-1.3928
CPC017_A375_6H:BRD-K29173907-001-03-5:10	BRD-K29173907	isoflupredone-acetate	A375	trt_cp	10 uM	6 h	3	158	0.21	0.184191	0	0	1	1	0	Glucocorticoid receptor agonist	NR3C1	-0.4627	0.7888	-1.3928
CPD001_MCF7_6H:D04	BRD-K88682005	chlorothiazide	MCF7	trt_cp	10 uM	6 h	3	126	0.1485	0.138318	1	0	1	1	0	Diuretic	SLC12A3|CA2|CA1|CA4	-0.4627	0.7884	-1.3927
LJP005_PC3_24H:I04	BRD-K58772419	AZD-6482	PC3	trt_cp	0.37 uM	24 h	2	62	0.3677	0.152677	1	1	1	1	0	PI3K inhibitor	PIK3CB|PIK3CD|PIK3CG|PIK3CA	-0.4626	0.7874	-1.3926
REP.B018_MCF10A_24H:L06	BRD-A65248799	EMD-53998	MCF10A	trt_cp	0.01 uM	24 h	2	41	0.0102	0.0206787	0	0	1	1	0	Phosphodiesterase inhibitor	PDE3A|TNNC1	-0.4626	0.7859	-1.3925
LJP008_HEK293_24H:O15	BRD-A50737080	CGK-733	HEK293	trt_cp	1.11 uM	24 h	2	40	0.1317	0.0733928	1	1	1	1	0	ATM kinase inhibitor|ATR kinase inhibitor	ATM|ATR	-0.4626	0.7858	-1.3924
PBIOA018_PC3_24H:M19	BRD-K92441787	bexarotene	PC3	trt_cp	10 uM	24 h	3	179	0.4	0.270575	1	1	1	1	0	Retinoid receptor agonist	RXRA|RXRB|RXRG|ABCA1|CYP2C8|CYP3A4	-0.4626	0.7858	-1.3924
REP.B018_HT29_24H:D16	BRD-K62734952	arglabin	HT29	trt_cp	0.08 uM	24 h	2	92	0.3439	0.179862	1	1	1	1	0	Farnesyltransferase inhibitor	FNTA|NFKB1	-0.4625	0.7848	-1.3923
CPC018_ASC_24H:BRD-K10843433-001-12-8:10	BRD-K10843433	phenylbutazone	ASC	trt_cp	10 uM	24 h	3	204	0.07	0.120836	1	0	1	1	0	Cyclooxygenase inhibitor|Prostanoid receptor antagonist	PTGS2|PTGS1|PTGIS	-0.4625	0.7843	-1.3922
CPC003_VCAP_6H:BRD-K00206590-001-01-2:10	BRD-K00206590	P-1075	VCAP	trt_cp	10 uM	6 h	5	138	0.11	0.124585	0	0	1	1	0	ATP channel activator|Potassium channel activator	KCNJ11	-0.4625	0.7844	-1.3922
MOAR001_A375_24H:J13	BRD-A89196962	dalargin	A375	trt_cp	10 uM	24 h	2	46	0.1199	0.0750964	1	1	1	1	0	Opioid receptor agonist	OPRM1	-0.4624	0.784	-1.3919
REP.B020_A549_24H:I14	BRD-K45117373	Y-26763	A549	trt_cp	0.74 uM	24 h	2	133	0.337	0.214078	0	0	1	1	0	Potassium channel activator	KCNJ8|ABCC9	-0.4623	0.784	-1.3918
CPC018_PHH_24H:BRD-K17497770-001-01-0:10	BRD-K17497770	butein	PHH	trt_cp	10 uM	24 h	3	106	0.04	0.0658436	0	0	1	1	0	EGFR inhibitor|Src inhibitor	ACE|CXCL8|IL6|SIRT1|SRD5A1|SRD5A2|TNF	-0.4623	0.784	-1.3916
REP.A015_MCF7_24H:M03	BRD-K59632282	quinidine	MCF7	trt_cp	1.11 uM	24 h	3	103	0.3254	0.185122	1	1	1	1	0	Sodium channel inhibitor	SCN5A|ABCB1|CYP2D6|KCNA5|KCNA7|KCNH1|KCNH2|KCNH5|KCNK1|KCNK6|SLC29A4	-0.4623	0.784	-1.3916
REP.A008_HELA_24H:M13	BRD-K88052444	urea	HELA	trt_cp	10 uM	24 h	3	121	0.2881	0.188797	0	0	1	1	0	Hydroxy radical formation stimulant	ARG1|CA2|CTNNB1	-0.4623	0.784	-1.3915
ASG003_U2OS_24H:L02	BRD-K56301217	ABT-737	U2OS	trt_cp	1.11 uM	24 h	5	293	0.4865	0.381774	1	1	1	1	0	BCL inhibitor	BCL2|BCL2L1|BCL2L2	-0.4622	0.784	-1.3913
CPC014_A549_6H:BRD-A45498368-001-02-2:10	BRD-A45498368	WYE-125132	A549	trt_cp	10 uM	6 h	3	253	0.53	0.370279	1	1	1	1	0	MTOR inhibitor	MTOR|PIK3CA	-0.4622	0.784	-1.3913
LJP006_A375_24H:J05	BRD-K72414522	AZD-5438	A375	trt_cp	0.12 uM	24 h	2	138	0.6414	0.300839	1	1	1	1	0	CDK inhibitor	CCNB1|CCNE1|CDK1|CDK2|KCNH2	-0.4622	0.784	-1.3913
REP.B021_YAPC_24H:A24	BRD-K19111024	clofibric-acid	YAPC	trt_cp	0.01 uM	24 h	2	191	0.3772	0.271415	1	1	1	1	0	PPAR receptor agonist	PPARA	-0.4622	0.784	-1.3912
CPC018_SKB_24H:BRD-A36267905-003-12-7:10	BRD-A36267905	buphenine	SKB	trt_cp	10 uM	24 h	3	184	0.39	0.270877	1	1	1	1	0	Adrenergic receptor agonist	ADRB2	-0.4621	0.784	-1.3911
REP.A012_JURKAT_24H:A08	BRD-K00077635	estramustine-phosphate	JURKAT	trt_cp	3.33 uM	24 h	3	106	0.1618	0.132426	1	0	1	1	0	DNA inhibitor|DNA alkylating agent|Estrogen receptor agonist|Tubulin inhibitor	ESR1|ESR2|MAP1A|MAP2	-0.4621	0.7839	-1.391
REP.A028_THP1_24H:H13	BRD-K94293891	suvorexant	THP1	trt_cp	10 uM	24 h	2	149	0.1335	0.142615	0	0	1	1	0	Orexin receptor antagonist	HCRTR1|HCRTR2	-0.4621	0.7836	-1.3909
CPC003_HA1E_6H:BRD-K95921201-001-07-0:10	BRD-K95921201	reserpine	HA1E	trt_cp	10 uM	6 h	2	104	0.28	0.172554	1	1	1	1	0	Vesicular monoamine transporter inhibitor	SLC18A2|SLC18A1	-0.4621	0.7838	-1.3909
REP.B007_HT29_24H:P07	BRD-K40175214	torin-1	HT29	trt_cp	2.22 uM	24 h	2	318	0.4544	0.384382	0	0	1	1	0	MTOR inhibitor|PI3K inhibitor	MTOR|PIK3CA	-0.462	0.7829	-1.3907
REP.A017_HT29_24H:I14	BRD-A64977602	mirtazapine	HT29	trt_cp	3.33 uM	24 h	3	119	0.2467	0.173256	1	0	1	1	0	Adrenergic receptor antagonist|Serotonin receptor antagonist	ADRA2A|HTR2A|HTR2C|ADRA2C|HTR3A|ADRA2B|ADRA1A|ADRA1B|ADRA1D|ADRB1|ADRB2|DRD1|DRD2|DRD3|DRD5|HRH1|HRH3|HTR2B|HTR7|OPRK1|SLC6A2|SLC6A3|SLC6A4	-0.462	0.7819	-1.3906
LJP006_HS578T_24H:L14	BRD-A79768653	sirolimus	HS578T	trt_cp	3.33 uM	24 h	3	132	0.43	0.240908	1	1	1	1	0	MTOR inhibitor	MTOR|FKBP1A|CCR5|FGF2	-0.4619	0.7797	-1.3904
REP.B008_YAPC_24H:A10	BRD-A68009927	daunorubicin	YAPC	trt_cp	0.08 uM	24 h	2	163	0.3877	0.254198	1	1	1	1	0	RNA synthesis inhibitor|Topoisomerase inhibitor	TOP2A|TOP2B	-0.4619	0.7798	-1.3904
LJP008_ASC_24H:B07	BRD-K92428232	GSK-461364	ASC	trt_cp	10 uM	24 h	2	124	0.3142	0.199593	0	0	1	1	0	PLK inhibitor	PLK1	-0.4619	0.7799	-1.3904
LJP008_HUVEC.A_24H:I01	BRD-K08109215	I-BET-762	HUVEC	trt_cp	10 uM	24 h	2	410	0.7582	0.563786	1	1	1	1	0	Bromodomain inhibitor	BRD2|BRD3|BRD4|APOA1	-0.4619	0.7799	-1.3904
REP.B003_HELA_24H:M17	BRD-K35629949	SR-27897	HELA	trt_cp	0.03 uM	24 h	3	180	0.4946	0.301713	1	1	1	1	0	CCK receptor antagonist	CCKAR	-0.4619	0.7795	-1.3903
CPC016_MCF7_24H:BRD-K03670461-001-02-0:10	BRD-K03670461	BRD-K03670461	MCF7	trt_cp	10 uM	24 h	4	125	0.27	0.185767	1	0	1	1	0	EGFR inhibitor	EGFR	-0.4618	0.7795	-1.3902
CPC010_A549_6H:BRD-K00234327-036-04-4:10	BRD-K00234327	RU-24969	A549	trt_cp	10 uM	6 h	2	69	0.08	0.0751277	1	1	1	1	0	Serotonin receptor agonist	HTR1A|HTR1B|HTR6|HTR1D|HTR2A|HTR2B|HTR2C|HTR5A	-0.4618	0.7795	-1.3901
REP.A012_MCF10A_24H:F01	BRD-K00911143	brexpiprazole	MCF10A	trt_cp	10 uM	24 h	3	101	0.2153	0.149112	1	1	1	1	0	Dopamine receptor antagonist	DRD2|HTR1A|HTR2A|DRD3	-0.4617	0.7793	-1.39
CPC014_SKB_24H:BRD-A37837077-003-01-1:10	BRD-A37837077	cyclazosin	SKB	trt_cp	10 uM	24 h	4	188	0.04	0.0876879	0	0	1	1	0	Adrenergic receptor antagonist	ADRA1B	-0.4618	0.7794	-1.39
REP.A023_MCF10A_24H:O24	BRD-K73107279	levamisole	MCF10A	trt_cp	0.04 uM	24 h	3	138	0.2764	0.197487	1	0	1	1	0	Acetylcholine receptor agonist	ALPL|ALPPL2|CHRNA3	-0.4617	0.7793	-1.3898
CPC018_ASC_24H:BRD-A03623303-045-05-3:10	BRD-A03623303	metoprolol	ASC	trt_cp	10 uM	24 h	3	139	0.12	0.130596	0	0	1	1	0	Adrenergic receptor antagonist	ADRB1|ADRB2	-0.4615	0.7763	-1.3894
LJP007_THP1_24H:J03	BRD-K50000283	PHA-767491	THP1	trt_cp	1.11 uM	24 h	3	345	0.5977	0.459179	1	1	1	1	0	CDC inhibitor	CDK1|RPS6KB1	-0.4616	0.7767	-1.3894
ASG003_MCF7_6H:K19	BRD-K63750851	BRD-K63750851	MCF7	trt_cp	10 uM	6 h	5	308	0.5079	0.39994	1	1	1	1	0	Dehydrogenase inhibitor|Inositol monophosphatase inhibitor	IMPDH1|IMPDH2	-0.4616	0.7769	-1.3894
CPD001_PC3_24H:BRD-K83064458-001-19-8:10	BRD-K83064458	etofylline	PC3	trt_cp	10 uM	24 h	3	169	0.25	0.207847	1	0	1	1	0	Adenosine receptor antagonist	ADORA1	-0.4616	0.777	-1.3894
CPC017_PHH_24H:BRD-K52721684-001-02-2:10	BRD-K52721684	PCO-400	PHH	trt_cp	10 uM	24 h	3	144	0.09	0.115115	0	0	1	1	0	Potassium channel activator	KCNJ8|ABCC9	-0.4615	0.7762	-1.3893
CPC001_HCC515_6H:BRD-K12120659-305-01-4:10	BRD-K12120659	GR-144053	HCC515	trt_cp	10 uM	6 h	2	85	0.13	0.106295	1	0	1	1	0	Integrin inhibitor	ITGB3|ITGA2B	-0.4615	0.7762	-1.3893
REP.B005_HELA_3H:F19	BRD-K09090949	CP-945598	HELA	trt_cp	2.22 uM	3 h	2	96	0.3229	0.178033	1	1	1	1	0	Cannabinoid receptor antagonist	CNR1	-0.4614	0.7762	-1.389
PAC005_U2OS_6H:BRD-A80594172-001-02-0:10	BRD-A80594172	betamethasone-valerate	U2OS	trt_cp	10 uM	6 h	2	49	0.32	0.12662	1	1	1	1	0	Glucocorticoid receptor agonist	NR3C1	-0.4614	0.7762	-1.3889
REP.B010_A549_24H:J12	BRD-K13819402	desoxypeganine	A549	trt_cp	0.01 uM	24 h	2	42	0.3409	0.120995	1	1	1	1	0	Acetylcholinesterase inhibitor|Monoamine oxidase inhibitor	ACHE|MAOA	-0.4614	0.7762	-1.3888
CPC006_AGS_6H:BRD-K15563106-001-08-1:177.6	BRD-K15563106	phloretin	AGS	trt_cp	200 uM	6 h	2	190	0.45	0.295674	1	1	1	1	0	Sodium channel inhibitor	AQP9|CLCN3|SLC23A1	-0.4614	0.7762	-1.3888
PAC001_U2OS_6H:BRD-K71499074-001-03-8:6.55396	BRD-K71499074	diclofenamide	U2OS	trt_cp	6.66 uM	6 h	2	26	0.17	0.0672267	0	0	1	1	0	Carbonic anhydrase inhibitor	CA1|CA2|CA4|CA12|CA7	-0.4613	0.7762	-1.3887
LJP001_MCF10A_24H:BRD-K82091397-001-02-2:10	BRD-K82091397	SB-239063	MCF10A	trt_cp	10 uM	24 h	4	136	0.23	0.17884	1	0	1	1	0	P38 MAPK inhibitor	TNF|MAPK11|MAPK14|PTGS2	-0.4613	0.7762	-1.3887
REP.A007_HA1E_24H:H01	BRD-K51333959	siramesine	HA1E	trt_cp	10 uM	24 h	3	269	0.4607	0.355972	1	1	1	1	0	Sigma receptor antagonist	PGRMC1|SIGMAR1|ADRA1A|ADRA1B|ADRA1D	-0.4612	0.7762	-1.3883
CPC001_PC3_6H:BRD-K63874012-103-01-5:10	BRD-K63874012	thioperamide	PC3	trt_cp	10 uM	6 h	4	82	0.06	0.0709273	1	0	1	1	0	Histamine receptor antagonist	HRH3|HRH4	-0.4612	0.7762	-1.3883
REP.B008_THP1_24H:H01	BRD-K69688083	mestinon	THP1	trt_cp	2.22 uM	24 h	2	130	0.1756	0.152779	1	1	1	1	0	Cholinesterase inhibitor	ACHE|BCHE	-0.4611	0.7752	-1.3881
LJP008_NEU_24H:A11	BRD-K87142802	veliparib	NEU	trt_cp	0.12 uM	24 h	2	382	0.713	0.527724	0	0	1	1	0	PARP inhibitor	PARP1|PARP2	-0.4611	0.7753	-1.3881
REP.A021_YAPC_24H:L23	BRD-K84892605	IOWH-032	YAPC	trt_cp	0.125 uM	24 h	2	193	0.3964	0.279689	1	1	1	1	0	CFTR channel antagonist	CFTR	-0.4611	0.7732	-1.388
PBIOA017_HA1E_24H:H19	BRD-K76617868	fasudil	HA1E	trt_cp	10 uM	24 h	3	185	0.39	0.271612	1	1	1	1	0	Rho associated kinase inhibitor	ROCK1|ROCK2|PKIA|PRKACA	-0.461	0.7721	-1.3879
REP.A027_HT29_24H:E09	BRD-A94756469	digoxin	HT29	trt_cp	1.11 uM	24 h	3	634	0.736	0.690739	0	0	1	1	0	Na/K-ATPase inhibitor	ATP1A1|ABCB1|RORC|SLCO1B3	-0.461	0.7719	-1.3878
REP.A021_HUVEC.A_24H:H14	BRD-K82941592	rosuvastatin	HUVEC	trt_cp	3.33 uM	24 h	2	147	0.3549	0.230963	1	1	1	1	0	HMGCR inhibitor	HMGCR	-0.461	0.7718	-1.3877
PBIOA016_HT29_24H:H17	BRD-K36234266	carmustine	HT29	trt_cp	0.125 uM	24 h	3	95	0.15	0.120709	1	0	1	1	0	DNA alkylating agent|DNA inhibitor	GSR|TXNRD1|TXNRD2	-0.461	0.7718	-1.3876
MOAR003_PC3_24H:F22	BRD-K40109029	SB-505124	PC3	trt_cp	10 uM	24 h	2	349	0.7021	0.500545	1	1	1	1	0	ALK inhibitor	TGFBR1|ACVR1B|ACVR1C	-0.4609	0.7718	-1.3875
REP.A002_A375_24H:D17	BRD-K16195444	oxymetazoline	A375	trt_cp	0.125 uM	24 h	3	68	0.1202	0.0914192	1	0	1	1	0	Adrenergic receptor agonist	ADRA1A|ADRA2A|ADRA1B|ADRA1D|ADRA2B|ADRA2C|CYP2C19|HTR1B|HTR1D|HTR2C	-0.4609	0.7718	-1.3874
CPC017_PHH_24H:BRD-K68620903-001-03-1:10	BRD-K68620903	dydrogesterone	PHH	trt_cp	10 uM	24 h	3	76	0.07	0.0737541	0	0	1	1	0	Progesterone receptor agonist	PGR	-0.4609	0.7718	-1.3874
REP.B007_YAPC_24H:I07	BRD-K52911425	GDC-0941	YAPC	trt_cp	2.22 uM	24 h	2	168	0.3567	0.247535	1	1	1	1	0	PI3K inhibitor	PIK3CG|PIK3CA|PIK3CB|PIK3CD	-0.4609	0.7718	-1.3873
CPC006_MCF7_24H:M04	BRD-K47983010	BX-795	MCF7	trt_cp	10 uM	24 h	5	370	0.5486	0.455574	1	1	1	1	0	IKK inhibitor	PDPK1|IKBKE|TBK1|CDK2|CHEK1|GSK3B|KDR|PDK1	-0.4609	0.7718	-1.3873
CPC004_HCC515_24H:BRD-A29734509-011-06-0:10	BRD-A29734509	disopyramide	HCC515	trt_cp	10 uM	24 h	3	65	0.05	0.0576464	1	0	1	1	0	Sodium channel inhibitor	SCN5A|CHRM1|CHRM2|CHRM3|KCND2|KCND3|KCNH2	-0.4608	0.7718	-1.3872
REP.B015_HELA_24H:G19	BRD-A58048407	nimodipine	HELA	trt_cp	2.22 uM	24 h	2	108	0.3248	0.189387	1	1	1	1	0	Calcium channel blocker	CACNA1C|NR3C2|CACNA1D|CACNA1F|CACNA1S|AHR|CACNB1|CACNB2|CACNB3|CACNB4|CFTR	-0.4608	0.7718	-1.3872
REP.A020_A375_24H:M01	BRD-K47000838	BRD-K47000838	A375	trt_cp	4 uM	24 h	3	459	0.6151	0.537291	0	0	1	1	0	Tubulin inhibitor	ACTB	-0.4607	0.7717	-1.3869
REP.A002_HELA_24H:H08	BRD-K16762525	BRD-K16762525	HELA	trt_cp	3.33 uM	24 h	3	99	0.3605	0.19103	1	1	1	1	0	Bacterial 50S ribosomal subunit inhibitor	CYP3A4|CYP2C19|CYP3A5|CYP3A7	-0.4607	0.7714	-1.3868
EMU001_OCILY3_24H:K19	BRD-K08109215	I-BET-762	OCILY3	trt_cp	10 uM	24 h	3	501	0.7781	0.631346	1	1	1	1	0	Bromodomain inhibitor	BRD2|BRD3|BRD4|APOA1	-0.4607	0.7701	-1.3867
CPC013_SKB_24H:BRD-K45044657-001-01-4:10	BRD-K45044657	TC-H-106	SKB	trt_cp	10 uM	24 h	4	246	0.25	0.250766	0	0	1	1	0	HDAC inhibitor	HDAC1|HDAC2|HDAC3|HDAC8	-0.4607	0.7713	-1.3867
CPC015_A375_6H:BRD-K23566484-001-09-4:10	BRD-K23566484	nilutamide	A375	trt_cp	10 uM	6 h	3	81	0.05	0.0643514	1	0	1	1	0	Androgen receptor antagonist	AR|CYP2C19	-0.4606	0.7695	-1.3866
REP.B002_HT29_24H:A10	BRD-K15502390	nevirapine	HT29	trt_cp	0.08 uM	24 h	2	123	0.0384	0.0694942	0	0	1	1	0	Reverse transcriptase inhibitor	CYP2B6|CYP3A4|CYP2C19|CYP1A2|CYP2A6|CYP2C9|CYP2D6|CYP3A5	-0.4606	0.7695	-1.3866
CPC013_PC3_6H:BRD-K68191783-001-01-2:10	BRD-K68191783	ALW-II-38-3	PC3	trt_cp	10 uM	6 h	5	282	0.42	0.348	1	1	1	1	0	Ephrin inhibitor	DDR1	-0.4605	0.7684	-1.3861
ISO002_HCT116.WT_24H:H07	BRD-K69023402	thapsigargin	HCT116	trt_cp	10 uM	24 h	3	66	0.466	0.177335	1	1	1	1	0	ATPase inhibitor	ATP2A1	-0.4604	0.7684	-1.3859
[truncated: 36,518 more rows]
