# Supplementary material for: Integrating single-nucleus sequence profiling to reveal the transcriptional dynamics of Alzheimer’s disease, Parkinson’s disease, and multiple sclerosis
Source: J Transl Med. 2023 Sep 21;21:649. doi: 10.1186/s12967-023-04516-6 (PMC10515258; doi:10.1186/s12967-023-04516-6)
Supplement: Supplementary file 11 — Additional file 11: Table S10. The Cmap results of MS. [file 12967_2023_4516_MOESM11_ESM.xlsx]

## Sheet: MS
Supplementary Table S10. The Cmap results of MS.
id	pert_id	pert_iname	cell_iname	pert_type	pert_idose	pert_itime	nsample	ss_ngene	cc_q75	tas	qc_pass	is_hiq	is_ncs_sig	is_exemplar_sig	is_null_sig	moa	target_name	raw_cs	fdr_q_nlog10	norm_cs
CPC017_ASC_24H:BRD-K43330982-001-01-5:10	BRD-K43330982	JTE-013	ASC	trt_cp	10 uM	24 h	3	458	0.26	0.348939	1	0	1	1	0	Lysophospholipid receptor antagonist	S1PR2|P2RY10	-0.8073	15.6536	-2.0973
CPC016_NPC_24H:BRD-K28307902-001-09-2:10	BRD-K28307902	flutamide	NPC	trt_cp	10 uM	24 h	4	126	0.08	0.101522	0	0	1	1	0	Androgen receptor antagonist	AR|CYP2C19|AHR	-0.7975	15.6536	-2.0717
REP.A026_YAPC_24H:N21	BRD-A99939097	carisoprodol	YAPC	trt_cp	1.11 uM	24 h	2	158	0.1262	0.142787	0	0	1	1	0	Acetylcholine receptor antagonist	CYP2C19	-0.7972	15.6536	-2.071
LJP007_HUVEC_24H:I22	BRD-K76694128	rebastinib	HUVEC	trt_cp	0.37 uM	24 h	3	354	0.5837	0.45965	1	1	1	1	0	Bcr-Abl inhibitor|TIE tyrosine kinase inhibitor|VEGFR inhibitor	ABL1|BCR|FLT3|FGR|HCK|KDR|LYN|TEK|SRC	-0.7836	15.6536	-2.0356
CPC017_ASC_24H:BRD-K50422030-003-01-8:10	BRD-K50422030	clomethiazole	ASC	trt_cp	10 uM	24 h	4	222	0.07	0.126054	1	0	1	1	0	GABA receptor antagonist|GABA receptor modulator	GABRA1	-0.7834	15.6536	-2.0351
CPC003_PC3_6H:BRD-K08640512-003-01-5:10	BRD-K08640512	RS-100329	PC3	trt_cp	10 uM	6 h	4	163	0.08	0.11547	0	0	1	1	0	Adrenergic receptor antagonist	ADRA1A|ADRA1D	-0.7799	15.6536	-2.026
CPC020_HA1E_6H:BRD-K83636919-001-01-4:10	BRD-K83636919	entacapone	HA1E	trt_cp	10 uM	6 h	3	111	0.16	0.134757	1	0	1	1	0	Catechol O methyltransferase inhibitor	COMT	-0.7796	15.6536	-2.0252
CPC015_ASC_24H:BRD-K81839095-001-04-6:10	BRD-K81839095	estrone	ASC	trt_cp	10 uM	24 h	4	249	0.02	0.0713584	0	0	1	1	0	Estrogen receptor agonist	ESR1|ESR2	-0.7739	15.6536	-2.0105
PBIOA015_A375_24H:N08	BRD-K13044802	ciclopirox	A375	trt_cp	3.33 uM	24 h	2	264	0.47	0.35619	1	1	1	1	0	Membrane integrity inhibitor	ATP1A1	-0.7731	15.6536	-2.0084
REP.B011_HA1E_24H:M24	BRD-A07563059	bopindolol	HA1E	trt_cp	0.01 uM	24 h	2	82	0.2059	0.131391	1	1	1	1	0	Adrenergic receptor antagonist	ADRB1|ADRB2|ADRB3|HTR1A|HTR1B	-0.7714	15.6536	-2.0039
CPC005_VCAP_24H:BRD-K18036262-001-01-0:10	BRD-K18036262	L-168049	VCAP	trt_cp	10 uM	24 h	5	429	0.26	0.337712	0	0	1	1	0	Glucagon receptor antagonist	GCGR	-0.7699	15.6536	-2.0002
LJP007_HEPG2_24H:G23	BRD-K09186807	KIN001-244	HEPG2	trt_cp	0.12 uM	24 h	2	290	0.6555	0.440875	0	0	1	1	0	PDK1 Inhibitor	PDPK1	-0.7655	15.6536	-1.9885
CPC018_ASC_24H:BRD-K15567136-003-18-1:10	BRD-K15567136	papaverine	ASC	trt_cp	10 uM	24 h	3	209	0.22	0.216828	1	0	1	1	0	Phosphodiesterase inhibitor	PDE10A|PDE4B|PDE5A	-0.7598	15.6536	-1.9737
CPC020_MCF7_24H:BRD-K10016611-003-02-2:10	BRD-K10016611	BRD-K10016611	MCF7	trt_cp	10 uM	24 h	5	117	0.16	0.138351	1	0	1	1	0	Acetylcholinesterase inhibitor	ACHE	-0.7568	15.6536	-1.9659
REP.A004_HEK293_24H:K02	BRD-K24616672	procaine	HEK293	trt_cp	3.33 uM	24 h	3	141	0.5028	0.269239	0	0	1	1	0	HMGCR inhibitor	HTR3A|HMGCR|CHRNA2|GRIN3A|KCNMA1|KCNMB1|KCNMB2|KCNMB3|KCNMB4|KCNN1|KCNN2|KCNN3|KCNN4|MAOA|MAOB|RYR1|RYR2|SCN10A|SLC6A3	-0.753	15.6536	-1.956
REP.A027_A375_24H:H06	BRD-K95880107	PH-797804	A375	trt_cp	0.04 uM	24 h	3	202	0.2022	0.20436	0	0	1	1	0	P38 MAPK inhibitor	MAPK14|MAPK11	-0.752	15.6536	-1.9535
CPC001_HCC515_6H:BRD-K96862998-001-03-1:10	BRD-K96862998	pirfenidone	HCC515	trt_cp	10 uM	6 h	2	283	0.18	0.228223	1	0	1	1	0	TGF-beta receptor inhibitor	TNF|MAPK14|TNFRSF1A|FURIN	-0.7489	15.6536	-1.9454
CPC017_ASC_24H:BRD-K26521938-001-04-9:10	BRD-K26521938	dinoprostone	ASC	trt_cp	10 uM	24 h	4	422	0.55	0.487156	0	0	1	1	0	Prostanoid receptor agonist	PTGER2|PTGER1|PTGER3|PTGER4|CATSPER1|CATSPER2|CATSPER3|CATSPER4|PTGDR|PTGDR2|PTGFR|TBXA2R	-0.7464	15.6536	-1.9389
REP.B026_HELA_24H:C12	BRD-K88366685	trimetazidine	HELA	trt_cp	0.01 uM	24 h	2	100	0.1772	0.134605	1	0	1	1	0	3-ketoacyl CoA thiolase inhibitor	ACAA2	-0.7461	15.6536	-1.9383
PBIOA019_PC3_24H:P01	BRD-K33425534	exemestane	PC3	trt_cp	10 uM	24 h	3	342	0.44	0.392256	1	1	1	1	0	Aromatase inhibitor	CYP19A1	-0.7454	15.6536	-1.9363
REP.A009_YAPC_24H:F17	BRD-A29854054	lorglumide	YAPC	trt_cp	0.125 uM	24 h	2	809	0.7697	0.797931	0	0	1	1	0	CCK receptor antagonist	CCKAR|CCKBR	-0.7452	15.6536	-1.9359
REP.A016_JURKAT_24H:L13	BRD-K55026842	azacitidine	JURKAT	trt_cp	10 uM	24 h	2	663	0.7866	0.730238	0	0	1	1	0	DNA methyltransferase inhibitor	DNMT1|DNMT3A	-0.7444	15.6536	-1.9337
REP.B023_MCF10A_24H:C09	BRD-A68304895	BTS-54505	MCF10A	trt_cp	0.25 uM	24 h	2	150	0.2982	0.21386	0	0	1	1	0	Dopamine receptor antagonist|Adrenergic receptor antagonist|Norepinephrine reuptake inhibitor|Serotonin reuptake inhibitor	SLC6A2|SLC6A3|SLC6A4	-0.7436	15.6536	-1.9316
CPC006_AGS_6H:BRD-K68336408-001-04-2:56.78	BRD-K68336408	BRD-K68336408	AGS	trt_cp	60 uM	6 h	2	254	0.48	0.353076	1	1	1	1	0	EGFR inhibitor	EGFR|MAPK14	-0.7408	15.6536	-1.9246
CPD001_PC3_24H:BRD-K88682005-001-10-9:10	BRD-K88682005	chlorothiazide	PC3	trt_cp	10 uM	24 h	3	388	0.04	0.125973	1	0	1	1	0	Diuretic	SLC12A3|CA2|CA1|CA4	-0.7405	15.6536	-1.9236
LJP005_SKBR3_24H:P07	BRD-K87737963	CYT-387	SKBR3	trt_cp	10 uM	24 h	3	191	0.46	0.299727	1	1	1	1	0	JAK inhibitor	JAK1|JAK2|JAK3	-0.7402	15.6536	-1.9228
REP.B008_HT29_24H:C01	BRD-K36740062	GSK-1070916	HT29	trt_cp	2.22 uM	24 h	2	448	0.6064	0.527047	0	0	1	1	0	Aurora kinase inhibitor	AURKB|AURKC|AURKA|CYP2D6|CYP3A4	-0.7399	15.6536	-1.922
REP.B007_PC3_24H:C01	BRD-K43723251	chenodiol	PC3	trt_cp	2.22 uM	24 h	2	120	0.3525	0.20797	1	1	1	1	0	11-beta-HSD1 inhibitor	HSD11B1	-0.7393	15.6536	-1.9206
CPC014_SKB_24H:BRD-K49669041-001-02-7:10	BRD-K49669041	BX-912	SKB	trt_cp	10 uM	24 h	3	416	0.58	0.496697	0	0	1	1	0	PDK inhibitor	PDPK1|AKT2|CDK2|CHEK1|GSK3B|KDR|PDK1	-0.7383	15.6536	-1.918
CPC005_HCC515_6H:BRD-K86600316-003-01-2:10	BRD-K86600316	RS-79948	HCC515	trt_cp	10 uM	6 h	2	60	0.05	0.0553849	1	0	1	1	0	Adrenergic receptor antagonist	ADRA2A	-0.7369	15.6536	-1.9144
CPC012_ASC_24H:BRD-K49372556-001-01-7:10	BRD-K49372556	mofezolac	ASC	trt_cp	10 uM	24 h	4	169	0.26	0.211963	1	0	1	1	0	Cyclooxygenase inhibitor	PTGS1	-0.7363	15.6536	-1.9127
CPC016_ASC_24H:BRD-K06543683-066-01-3:10	BRD-K06543683	bisindolylmaleimide-ix	ASC	trt_cp	10 uM	24 h	2	510	0.65	0.5822	0	0	1	1	0	PKC inhibitor	SIRT1|LRRK2|SIRT2|AKT1|GSK3B|LCK|MAPK1|MAPK11|MAPK12|MAPK14|MAPK8|PRKCA|ROCK1|RPS6KB1	-0.7355	15.6536	-1.9107
PAC002_U2OS_6H:BRD-K43405658-001-01-8:10	BRD-K43405658	BRD-K43405658	U2OS	trt_cp	10 uM	6 h	2	126	0.2	0.160521	0	0	1	1	0	Protein tyrosine kinase inhibitor	EGFR	-0.7352	15.6536	-1.9098
CPC017_A549_24H:BRD-K02283807-003-01-4:10	BRD-K02283807	GR-32191	A549	trt_cp	10 uM	24 h	3	181	0.09	0.12906	1	0	1	1	0	Thromboxane receptor antagonist	TBXA2R	-0.7348	15.6536	-1.9087
CPC006_U937_6H:BRD-K04623885-001-03-4:80	BRD-K04623885	BIBR-1532	U937	trt_cp	80 uM	6 h	2	166	0.49	0.288392	1	1	1	1	0	Telomerase inhibitor	TERT	-0.7344	15.6536	-1.9079
REP.B014_HA1E_24H:I23	BRD-K56851771	enzalutamide	HA1E	trt_cp	0.03 uM	24 h	2	468	0.3576	0.413668	1	1	1	1	0	Androgen receptor antagonist	AR|CYP2C19|CYP2C8|CYP3A4	-0.7344	15.6536	-1.9078
MOAR018_HAP1.TP53_24H:I21	BRD-K06749501	GSK-1838705A	HAP1	trt_cp	3.33 uM	24 h	3	58	0.2102	0.111651	1	1	1	1	0	IGF-1 inhibitor	IGF1R|ALK|INSR|RPS6KA1	-0.7339	15.6536	-1.9065
REP.B008_JURKAT_24H:A07	BRD-A68009927	daunorubicin	JURKAT	trt_cp	2.22 uM	24 h	2	795	0.777	0.794739	0	0	1	1	0	RNA synthesis inhibitor|Topoisomerase inhibitor	TOP2A|TOP2B	-0.7334	15.3525	-1.9053
REP.B024_PC3_24H:D12	BRD-K74195153	irsogladine	PC3	trt_cp	0.01 uM	24 h	2	155	0.1627	0.16058	0	0	1	1	0	Phosphodiesterase inhibitor	PDE4A	-0.7327	15.3525	-1.9033
CPC014_PHH_24H:BRD-K18135438-001-08-4:10	BRD-K18135438	BRD-K18135438	PHH	trt_cp	10 uM	24 h	4	91	0.16	0.122014	0	0	1	1	0	11-beta-HSD1 inhibitor|FXR agonist	HSD11B1|NR1H4	-0.7326	15.3525	-1.9031
CPC011_A375_6H:BRD-K39391626-001-02-3:10	BRD-K39391626	ethylestrenol	A375	trt_cp	10 uM	6 h	3	533	0.11	0.244845	1	0	1	1	0	Progesterone receptor agonist	AR	-0.7326	15.3525	-1.9031
REP.A020_HEK293_24H:I13	BRD-K45117373	Y-26763	HEK293	trt_cp	10 uM	24 h	2	165	0.0372	0.0792217	0	0	1	1	0	Potassium channel activator	KCNJ8|ABCC9	-0.7324	15.3525	-1.9027
CPC005_HCC515_6H:BRD-K14536225-001-02-7:10	BRD-K14536225	piceid	HCC515	trt_cp	10 uM	6 h	2	79	0.02	0.0401938	1	0	1	1	0	Glucosidase inhibitor	XDH	-0.7306	15.3525	-1.8979
REP.A006_PC3_24H:P24	BRD-K24576554	AT-9283	PC3	trt_cp	0.04 uM	24 h	3	191	0.3107	0.24633	1	1	1	1	0	Aurora kinase inhibitor|Abl inhibitor|Bcr-Abl inhibitor|FLT3 inhibitor|JAK inhibitor|Protein kinase inhibitor|Tubulin inhibitor	JAK2|AURKA|AURKB|JAK3|ABL1|BCR|FLT3|RPS6KA6|STK17A	-0.7303	15.3525	-1.8972
LJP008_HUVEC_24H:E01	BRD-K56301217	ABT-737	HUVEC	trt_cp	10 uM	24 h	3	232	0.4905	0.34111	1	1	1	1	0	BCL inhibitor	BCL2|BCL2L1|BCL2L2	-0.73	15.3525	-1.8963
CPD003_MCF7_24H:B20	BRD-A33749298	oxyphenbutazone	MCF7	trt_cp	10 uM	24 h	3	79	0.1239	0.100041	1	0	1	1	0	Cyclooxygenase inhibitor	PLA2G2E|PTGS1|PTGS2	-0.7296	15.3525	-1.8953
CPC018_SKB_24H:BRD-K54142781-003-02-7:10	BRD-K54142781	cirazoline	SKB	trt_cp	10 uM	24 h	3	162	0.41	0.260603	0	0	1	1	0	Adrenergic receptor agonist	ADRA1A	-0.7295	15.3525	-1.8951
CPC001_PC3_6H:BRD-K11911061-003-02-8:10	BRD-K11911061	GR-127935	PC3	trt_cp	10 uM	6 h	4	249	0.35	0.298514	1	1	1	1	0	Serotonin receptor antagonist	HTR1B|HTR1D|HTR1A|HTR2A|HTR2C|HTR1E|HTR1F|HTR2B|HTR6	-0.7293	15.3525	-1.8946
PBIOA013_PC3_24H:D02	BRD-K25325018	GSK-690693	PC3	trt_cp	3.33 uM	24 h	3	239	0.39	0.308718	1	1	1	1	0	AKT inhibitor	AKT1|AKT2|AKT3|PAK4|PAK6|PAK7|PRKCQ|PRKG1|PRKX	-0.7291	15.3525	-1.8939
REP.A006_YAPC_24H:O08	BRD-A24191444	ifenprodil	YAPC	trt_cp	3.33 uM	24 h	3	174	0.3342	0.243842	1	0	1	1	0	Adrenergic receptor antagonist|Glutamate receptor antagonist	GRIN1|GRIN2B	-0.729	15.3525	-1.8938
CPC018_SKB_24H:BRD-K26429091-051-01-9:10	BRD-K26429091	J-104129	SKB	trt_cp	10 uM	24 h	3	223	0.44	0.316745	0	0	1	1	0	Acetylcholine receptor antagonist	CHRM3	-0.7277	15.3525	-1.8905
CPC006_U937_6H:BRD-K76205745-237-05-8:160	BRD-K76205745	losartan	U937	trt_cp	150 uM	6 h	2	78	0.45	0.189445	1	1	1	1	0	Angiotensin receptor antagonist	AGTR1	-0.7261	15.3525	-1.8863
REP.B012_PC3_24H:G01	BRD-K01577834	adenosine	PC3	trt_cp	2.22 uM	24 h	2	111	0.3681	0.204397	0	0	1	1	0	Adenosine receptor agonist	ADORA1|ADORA2A|ADORA2B|ADORA3|PI4K2A|PI4K2B|TRPM4	-0.7254	15.3525	-1.8845
CPC001_HCC515_6H:BRD-A04668240-001-01-5:10	BRD-A04668240	CGP-52432	HCC515	trt_cp	10 uM	6 h	2	503	0.4	0.45357	1	1	1	1	0	GABA receptor antagonist	GABBR1	-0.7244	15.3525	-1.8819
CPC017_HEPG2_6H:BRD-K60762818-003-15-3:10	BRD-K60762818	desipramine	HEPG2	trt_cp	10 uM	6 h	3	133	0.17	0.152048	1	1	1	1	0	Tricyclic antidepressant	SLC6A2|SLC6A4|ADRA1A|ADRA1B|ADRA1D|ADRA2A|ADRA2B|ADRA2C|ADRB1|ADRB2|CHRM1|CHRM2|CHRM3|CHRM4|CHRM5|DRD2|HRH1|HTR1A|HTR2A|HTR2C|SMPD1	-0.7239	15.3525	-1.8806
REP.B007_MCF7_24H:J06	BRD-K52183142	pregnenolone	MCF7	trt_cp	0.01 uM	24 h	2	707	0.4446	0.566924	0	0	1	1	0	Glutamate receptor modulator	PGR|CYP17A1|SULT2B1	-0.7238	15.3525	-1.8801
CPC006_NOMO1_6H:BRD-K37865504-001-02-5:10	BRD-K37865504	LY-2183240	NOMO1	trt_cp	10 uM	6 h	2	478	0.16	0.279643	0	0	1	1	0	FAAH inhibitor	FAAH	-0.7237	15.3525	-1.88
CPC015_ASC_24H:BRD-K12539581-001-14-6:10	BRD-K12539581	nocodazole	ASC	trt_cp	10 uM	24 h	4	388	0.15	0.243945	0	0	1	1	0	Tubulin inhibitor	HPGDS	-0.7227	15.3525	-1.8773
CPC012_SKB_24H:BRD-A61858259-001-01-0:10	BRD-A61858259	CAY-10415	SKB	trt_cp	10 uM	24 h	4	397	0.12	0.220707	0	0	1	1	0	Insulin sensitizer	INS	-0.7194	15.3525	-1.8689
CPC015_NPC_24H:BRD-A65671304-001-03-4:10	BRD-A65671304	candesartan-cilextil	NPC	trt_cp	10 uM	24 h	4	218	0.22	0.221447	0	0	1	1	0	Angiotensin receptor antagonist	AGTR1|AGTR2	-0.718	15.3525	-1.8653
REP.B027_HT29_24H:L03	BRD-K93461745	buspirone	HT29	trt_cp	0.25 uM	24 h	2	65	0.1936	0.113433	1	1	1	1	0	Serotonin receptor agonist	HTR1A|DRD2	-0.7179	15.3525	-1.8651
REP.A003_JURKAT_24H:I19	BRD-K34022604	clofarabine	JURKAT	trt_cp	10 uM	24 h	2	247	0.4897	0.351677	0	0	1	1	0	Ribonucleoside reductase inhibitor	RRM1|POLA1|RRM2|SLC22A8|POLD1|POLE|RRM2B	-0.7179	15.3525	-1.8649
REP.B012_MCF7_24H:G01	BRD-K01577834	adenosine	MCF7	trt_cp	2.22 uM	24 h	2	152	0.4583	0.266887	0	0	1	1	0	Adenosine receptor agonist	ADORA1|ADORA2A|ADORA2B|ADORA3|PI4K2A|PI4K2B|TRPM4	-0.7176	15.3525	-1.8641
CPC017_A549_6H:BRD-K65639003-001-05-8:10	BRD-K65639003	icariin	A549	trt_cp	10 uM	6 h	3	200	0.38	0.278764	1	0	1	1	0	Phosphodiesterase inhibitor	NMUR2|SORD|PDE5A	-0.7169	15.3525	-1.8622
CPC006_U937_6H:BRD-K67566344-001-01-8:10	BRD-K67566344	KU-0063794	U937	trt_cp	10 uM	6 h	2	261	0.41	0.330783	0	0	1	1	0	MTOR inhibitor	MTOR	-0.7156	15.3525	-1.8589
LIVB002_HUH7_72H:G22	BRD-K01095011	finasteride	HUH7	trt_cp	8 uM	72 h	3	115	0.12	0.118787	0	0	1	1	0	5-alpha reductase inhibitor	SRD5A2|SRD5A1|AR|AKR1D1	-0.7155	15.3525	-1.8587
PBIOA015_HT29_24H:P07	BRD-K22134346	simvastatin	HT29	trt_cp	10 uM	24 h	3	255	0.37	0.3106	1	1	1	1	0	HMGCR inhibitor	HMGCR|CYP2C8|CYP3A4|CYP3A5|ITGB2	-0.7154	15.3525	-1.8584
CPC006_NOMO1_6H:BRD-K16406336-311-01-2:10	BRD-K16406336	methylene-blue	NOMO1	trt_cp	10 uM	6 h	2	81	0.45	0.193054	0	0	1	1	0	Nitric oxide production inhibitor|Guanylyl cyclase inhibitor|Monoamine oxidase inhibitor|Tau aggregation inhibitor	ACHE|MAPT	-0.7152	15.3525	-1.858
REP.A013_PC3_24H:C13	BRD-A37959677	estrone	PC3	trt_cp	10 uM	24 h	2	93	0.1397	0.115258	1	0	1	1	0	Estrogen receptor agonist|Estrogenic hormone	ESR1|ESR2	-0.7152	15.3525	-1.858
LJP005_HS578T_24H:E07	BRD-K93788137	PF-431396	HS578T	trt_cp	10 uM	24 h	3	627	0.77	0.702603	0	0	1	1	0	Focal adhesion kinase inhibitor	PTK2|PTK2B	-0.7148	15.3525	-1.8569
REP.A001_HA1E_24H:B19	BRD-K25394294	oxaprozin	HA1E	trt_cp	10 uM	24 h	3	113	0.2201	0.15947	1	0	1	1	0	Cyclooxygenase inhibitor	PTGS1|PTGS2	-0.7148	15.3525	-1.8569
CPC016_NEU_24H:BRD-A69815203-001-05-0:10	BRD-A69815203	cyclosporin-a	NEU	trt_cp	10 uM	24 h	3	217	0.25	0.235521	0	0	1	1	0	Calcineurin inhibitor	PPIA|PPP3CA	-0.7139	15.3525	-1.8546
CPC018_SKB_24H:BRD-K17497770-001-01-0:10	BRD-K17497770	butein	SKB	trt_cp	10 uM	24 h	3	179	0.45	0.286988	0	0	1	1	0	EGFR inhibitor|Src inhibitor	ACE|CXCL8|IL6|SIRT1|SRD5A1|SRD5A2|TNF	-0.7134	15.3525	-1.8532
MOAR007_PC3_24H:G04	BRD-K85015012	NNC-05-2090	PC3	trt_cp	10 uM	24 h	3	326	0.49	0.404145	1	1	1	1	0	GAT inhibitor|GABA uptake inhibitor	SLC6A11|SLC6A13|SLC6A12	-0.7131	15.3525	-1.8526
LJP001_SKBR3_24H:E21	BRD-K19540840	saracatinib	SKBR3	trt_cp	10 uM	24 h	4	292	0.5158	0.39243	1	1	1	1	0	Src inhibitor	SRC|ABL1|LCK|YES1	-0.7108	15.3525	-1.8466
REP.A013_YAPC_24H:F01	BRD-K38473998	cilomilast	YAPC	trt_cp	10 uM	24 h	3	354	0.5182	0.433093	1	1	1	1	0	Phosphodiesterase inhibitor	PDE4A|PDE4B|PDE4D|IL12A|IL12B|IL1B|PDE4C|TNF	-0.7102	15.3525	-1.845
REP.B021_MCF7_24H:M01	BRD-K85119730	tolbutamide	MCF7	trt_cp	2.22 uM	24 h	2	235	0.4276	0.320541	1	1	1	1	0	ATP channel blocker	ABCC8|KCNJ11|CYP2B6|CYP2C19|CYP2C8|KCNJ1|KCNJ8	-0.71	15.3525	-1.8443
REP.A013_YAPC_24H:M24	BRD-K43457670	acetazolamide	YAPC	trt_cp	0.04 uM	24 h	3	210	0.1659	0.18874	1	0	1	1	0	Carbonic anhydrase inhibitor	CA14|CA2|CA1|CA4|CA12|CA7|CA13|CA6|AQP1|CA3	-0.7095	15.3525	-1.8431
CPC006_HCC515_6H:C14	BRD-K17561142	amiodarone	HCC515	trt_cp	10 uM	6 h	3	103	0.2703	0.168722	1	1	1	1	0	Potassium channel antagonist	KCNH2|CHRM3|CYP2C8|SCN5A|ADRB1|CACNA1H|CACNA2D2|KCNA7	-0.7094	15.3525	-1.843
CPC003_HA1E_24H:BRD-K00675675-003-01-2:10	BRD-K00675675	CL-82198	HA1E	trt_cp	10 uM	24 h	3	205	0.07	0.121131	1	0	1	1	0	Metalloproteinase inhibitor	MMP13	-0.7094	15.3525	-1.8429
CPC006_U937_6H:BRD-K88544581-001-03-8:80	BRD-K88544581	CI-976	U937	trt_cp	80 uM	6 h	2	75	0.12	0.0959294	1	0	1	1	0	ACAT inhibitor	SOAT1|ACAT1|CES1	-0.7094	15.3525	-1.8429
MOAR006_A375_24H:C01	BRD-K86727142	embelin	A375	trt_cp	10 uM	24 h	3	457	0.54	0.502326	1	1	1	1	0	HCV inhibitor|XIAP inhibitor	XIAP	-0.7092	15.3525	-1.8425
REP.A002_A375_24H:P09	BRD-K18324993	budipine	A375	trt_cp	1.11 uM	24 h	3	117	0.1331	0.126186	1	0	1	1	0	Glutamate receptor antagonist	GRIN1	-0.7084	15.3525	-1.8402
REP.B014_HA1E_24H:G08	BRD-K59524082	maribavir	HA1E	trt_cp	0.74 uM	24 h	2	65	0.3199	0.145812	1	1	1	1	0	Protein kinase inhibitor	PYGM	-0.7083	15.3525	-1.8401
CPC011_A375_6H:BRD-A44133049-003-04-5:10	BRD-A44133049	azasetron	A375	trt_cp	10 uM	6 h	3	634	0.46	0.546077	0	0	1	1	0	Serotonin receptor antagonist	HTR3A|HTR3B	-0.708	15.3525	-1.8392
REP.A025_YAPC_24H:B07	BRD-K97729603	pimecrolimus	YAPC	trt_cp	10 uM	24 h	3	284	0.458	0.364689	1	1	1	1	0	Calcineurin inhibitor	FKBP1A|CYP3A5|MTOR	-0.7075	15.3525	-1.8379
MOAR006_A375_24H:E02	BRD-K87774949	istradefylline	A375	trt_cp	3.33 uM	24 h	3	160	0.31	0.225202	1	1	1	1	0	Adenosine receptor antagonist	ADORA2A|ADORA1|ADORA2B|ADORA3	-0.7073	15.3525	-1.8373
CPC014_HCC515_6H:BRD-K32710582-001-01-5:10	BRD-K32710582	EI-247	HCC515	trt_cp	10 uM	6 h	3	484	0.06	0.172317	1	0	1	1	0	IGF-1 inhibitor	INSR	-0.7064	15.3525	-1.8351
CPC005_A549_24H:BRD-K69023402-001-02-5:10	BRD-K69023402	thapsigargin	A549	trt_cp	10 uM	24 h	3	465	0.74	0.593161	1	1	1	1	0	ATPase inhibitor	ATP2A1	-0.7057	15.3525	-1.8334
CPC006_U937_6H:BRD-K68336408-001-04-2:56.78	BRD-K68336408	BRD-K68336408	U937	trt_cp	60 uM	6 h	2	252	0.59	0.389903	1	1	1	1	0	EGFR inhibitor	EGFR|MAPK14	-0.7053	15.3525	-1.8322
REP.B009_HELA_24H:D01	BRD-K28456624	seocalcitol	HELA	trt_cp	2.22 uM	24 h	2	394	0.5328	0.463298	0	0	1	1	0	Vitamin D receptor agonist	VDR	-0.7052	15.3525	-1.8319
CPC016_HEPG2_6H:BRD-K19309090-300-03-0:10	BRD-K19309090	SR-95639A	HEPG2	trt_cp	10 uM	6 h	3	100	0.11	0.106054	1	0	1	1	0	Acetylcholine receptor agonist	CHRM1	-0.7051	15.3525	-1.8316
CPC016_HEPG2_6H:BRD-K76810206-001-06-5:10	BRD-K76810206	nicergoline	HEPG2	trt_cp	10 uM	6 h	3	108	0.19	0.14485	1	0	1	1	0	Adrenergic receptor antagonist	ADRA1A	-0.705	15.3525	-1.8314
REP.A010_YAPC_24H:O21	BRD-K15426076	iguratimod	YAPC	trt_cp	1.11 uM	24 h	2	224	0.5108	0.342042	0	0	1	1	0	Cyclooxygenase inhibitor|NFKB inhibitor	PTGS2	-0.7048	15.3525	-1.831
REP.B016_MDAMB231_24H:E24	BRD-K52751261	TAK-715	MDAMB231	trt_cp	0.01 uM	24 h	2	51	0.0618	0.0567688	1	1	1	1	0	P38 MAPK inhibitor	MAPK14|TNF	-0.7045	15.3525	-1.8301
CPC017_HEPG2_6H:BRD-K10177585-003-01-6:10	BRD-K10177585	PSB-11	HEPG2	trt_cp	10 uM	6 h	3	196	0.39	0.27957	1	1	1	1	0	Adenosine receptor antagonist	ADORA3|ADORA1|ADORA2A	-0.7041	15.3525	-1.8291
LJP001_SKBR3_6H:BRD-K24859147-379-02-6:2	BRD-K24859147	KIN001-242	SKBR3	trt_cp	2.22 uM	6 h	4	144	0.33	0.220429	1	1	1	1	0	Protein kinase inhibitor	RPS6KA3	-0.7039	15.3525	-1.8285
CPC015_SKB_24H:BRD-K91315211-300-03-2:10	BRD-K91315211	betahistine	SKB	trt_cp	10 uM	24 h	2	62	0.12	0.0872202	0	0	1	1	0	Histamine receptor agonist|Histamine receptor antagonist	HRH3|HRH1	-0.7037	15.3525	-1.828
REP.A003_JURKAT_24H:I02	BRD-A33711280	metixene	JURKAT	trt_cp	3.33 uM	24 h	2	412	0.7219	0.551465	0	0	1	1	0	Acetylcholine receptor antagonist	CHRM5|CHRM1|CHRM2|CHRM3|CHRM4	-0.7035	15.3525	-1.8277
CPC017_SKB_24H:BRD-K50422030-003-01-8:10	BRD-K50422030	clomethiazole	SKB	trt_cp	10 uM	24 h	2	114	0.06	0.0836293	0	0	1	1	0	GABA receptor antagonist|GABA receptor modulator	GABRA1	-0.7033	15.3525	-1.8269
REP.B012_PC3_24H:H10	BRD-K01663662	diphenidol	PC3	trt_cp	0.08 uM	24 h	2	142	0.457	0.257592	0	0	1	1	0	Acetylcholine receptor agonist	CHRM1|CHRM3|CHRM4|CHRM2	-0.7032	15.3525	-1.8267
REP.B011_YAPC_24H:D01	BRD-A04553218	BRD-A04553218	YAPC	trt_cp	2.22 uM	24 h	2	565	0.7251	0.647223	0	0	1	1	0	Histamine receptor antagonist	HRH1|SLC6A2|SLC6A3|SLC6A4	-0.7031	15.3525	-1.8266
CPC018_A549_24H:BRD-K65285700-001-01-5:10	BRD-K65285700	GP-1a	A549	trt_cp	10 uM	24 h	2	229	0.09	0.145168	0	0	1	1	0	Cannabinoid receptor agonist	CNR2	-0.7031	15.3525	-1.8265
CPC006_U937_6H:BRD-K41895714-001-02-2:10	BRD-K41895714	AS-605240	U937	trt_cp	10 uM	6 h	2	103	0.39	0.202666	1	1	1	1	0	PI3K inhibitor	PIK3CG	-0.7029	15.3525	-1.8259
REP.A026_A375_24H:A20	BRD-K87782578	AVL-292	A375	trt_cp	3.33 uM	24 h	3	343	0.4282	0.387526	0	0	1	1	0	BTK inhibitor	BTK|EGFR|ITK|JAK3|YES1	-0.7023	15.3525	-1.8245
CPC001_PC3_24H:C04	BRD-K62289640	lylamine	PC3	trt_cp	10 uM	24 h	5	275	0.3114	0.295908	1	1	1	1	0	Cannabinoid receptor agonist	CNR1	-0.701	15.3525	-1.8211
CPC017_SKB_24H:BRD-K54704028-001-01-3:10	BRD-K54704028	BAY-36-7620	SKB	trt_cp	10 uM	24 h	2	324	0.67	0.47113	0	0	1	1	0	Glutamate receptor antagonist	GRM1	-0.7006	15.3525	-1.8199
CPC017_HEPG2_6H:BRD-A29734509-011-06-0:10	BRD-A29734509	disopyramide	HEPG2	trt_cp	10 uM	6 h	3	521	0.37	0.443967	1	0	1	1	0	Sodium channel inhibitor	SCN5A|CHRM1|CHRM2|CHRM3|KCND2|KCND3|KCNH2	-0.7002	15.3525	-1.8191
REP.A009_YAPC_24H:E19	BRD-K29950728	clomifene	YAPC	trt_cp	10 uM	24 h	3	191	0.3906	0.276193	0	0	1	1	0	Estrogen receptor antagonist	ESR1|AR	-0.7001	15.3525	-1.8188
PBIOA020_HCC515_24H:B14	BRD-K61314889	endo-IWR-1	HCC515	trt_cp	3.33 uM	24 h	3	340	0.48	0.408499	1	1	1	1	0	PARP inhibitor	TNKS|TNKS2	-0.6995	15.3525	-1.817
REP.B020_A549_24H:M24	BRD-K48578705	methyldopa	A549	trt_cp	0.01 uM	24 h	2	155	0.2952	0.216299	0	0	1	1	0	Adrenergic receptor agonist	ADRA2A|DDC|ADRA2B|ADRA2C	-0.6994	15.3525	-1.8169
CPC006_NOMO1_6H:BRD-K55966568-001-01-3:6	BRD-K55966568	orantinib	NOMO1	trt_cp	6.66 uM	6 h	2	695	0.64	0.674393	1	1	1	1	0	PDGFR inhibitor|FGFR inhibitor|VEGFR inhibitor	KDR|PDGFRB|FGFR1|AURKA|AURKB|PDGFRA|TBK1|EGFR|FGFR2	-0.6994	15.3525	-1.8168
CPC006_U937_6H:BRD-A43331270-001-01-6:10	BRD-A43331270	niguldipine	U937	trt_cp	10 uM	6 h	2	122	0.22	0.165662	1	1	1	1	0	Adrenergic receptor antagonist|Calcium channel blocker	ADRA1A|CACNA1C	-0.6989	15.3525	-1.8155
CPC016_NEU_24H:BRD-K56047318-001-03-0:10	BRD-K56047318	RHC-80267	NEU	trt_cp	10 uM	24 h	3	488	0.14	0.264304	0	0	1	1	0	Triacylglycerol lipase inhibitor	LIPC|LIPE|LIPG|DAGLA|DAGLB	-0.6985	15.3525	-1.8145
REP.B004_HELA_24H:L14	BRD-K20920669	cromoglicic-acid	HELA	trt_cp	0.74 uM	24 h	3	74	0.2259	0.130739	1	0	1	1	0	Immunosuppressant	KCNMA1|S100P	-0.6971	15.3525	-1.811
CPC017_A549_6H:BRD-K26573499-300-01-3:10	BRD-K26573499	DMAB-anabaseine	A549	trt_cp	10 uM	6 h	3	133	0.19	0.160743	1	0	1	1	0	Adrenergic receptor agonist	CHRNA7	-0.697	15.3525	-1.8108
REP.B018_HT29_24H:O24	BRD-A67479912	progesterone	HT29	trt_cp	0.01 uM	24 h	2	133	0.3683	0.223799	1	1	1	1	0	Progesterone receptor agonist	PGR|CYP17A1|NR3C2|CYP2C19|CATSPER1|CATSPER2|CATSPER3|CATSPER4|ESR1|OPRK1|TRPC5	-0.697	15.3525	-1.8107
PBIOA015_A375_24H:G19	BRD-K79877282	PF-543	A375	trt_cp	10 uM	24 h	3	175	0.27	0.219802	1	1	1	1	0	Sphingosine kinase inhibitor	SPHK1	-0.6969	15.3525	-1.8103
CPC006_NOMO1_6H:BRD-K06980535-003-15-0:10	BRD-K06980535	promazine	NOMO1	trt_cp	10 uM	6 h	2	114	0.6	0.264459	0	0	1	1	0	Dopamine receptor antagonist	CHRM5|DRD2|ADRA1A|ADRA1B|ADRA1D|CHRM1|CHRM2|CHRM3|CHRM4|DRD1|DRD3|DRD4|HRH1|HTR2A|HTR2C	-0.6963	15.3525	-1.8089
CPC018_A549_24H:BRD-A89337244-001-01-1:10	BRD-A89337244	PD-102807	A549	trt_cp	10 uM	24 h	2	121	0.28	0.186124	0	0	1	1	0	Acetylcholine receptor antagonist	CHRM4	-0.6957	15.3525	-1.8073
REP.B011_MDAMB231_24H:I12	BRD-K06388322	pramipexole	MDAMB231	trt_cp	0.01 uM	24 h	2	409	0.3074	0.358545	0	0	1	1	0	Dopamine receptor agonist	DRD3|DRD2|ADRA2A|ADRA2B|ADRA2C|DRD1|DRD4|DRD5|HTR1A|HTR1B|HTR1D|HTR2A|HTR2B|HTR2C	-0.6955	15.3525	-1.8067
CPC016_MCF7_6H:BRD-A17428743-003-03-3:10	BRD-A17428743	BW-723C86	MCF7	trt_cp	10 uM	6 h	3	120	0.09	0.105085	1	0	1	1	0	Serotonin receptor agonist	HTR2B|HTR2A|HTR2C	-0.6946	15.3525	-1.8043
CPC006_U937_6H:BRD-K96354014-001-09-6:10	BRD-K96354014	nifedipine	U937	trt_cp	10 uM	6 h	2	67	0.17	0.107918	1	1	1	1	0	Calcium channel blocker	CACNA1C|CACNA1D|CACNA1S|CACNA1F|CACNA2D1|CYP3A5|CACNA1H|CACNB2|CALM1|GLRA1|GLRA3|GLRB|KCNA1|KCNA5|NR1I2|TRPM3	-0.6941	15.3525	-1.8031
REP.A025_HA1E_24H:O20	BRD-K73381542	phenylephrine	HA1E	trt_cp	3.33 uM	24 h	3	501	0.2897	0.385233	1	0	1	1	0	Adrenergic receptor agonist	ADRA1A|ADRA1B|ADRA1D	-0.6941	15.3525	-1.803
CPC005_A549_24H:BRD-A47494775-003-03-0:10	BRD-A47494775	dipivefrine	A549	trt_cp	10 uM	24 h	3	147	0.16	0.155078	1	0	1	1	0	Adrenergic receptor agonist	ADRA1A|ACHE|ADRA2A|ADRB2|BCHE	-0.6939	15.3525	-1.8026
CPC005_PC3_24H:BRD-A75769826-003-01-3:10	BRD-A75769826	SDM-25N	PC3	trt_cp	10 uM	24 h	5	249	0.18	0.214075	1	0	1	1	0	Opioid receptor antagonist	OPRD1	-0.6938	15.3525	-1.8023
REP.B027_HA1E_24H:A13	BRD-A92630576	trimebutine	HA1E	trt_cp	2.22 uM	24 h	2	120	0.2223	0.165155	1	1	1	1	0	Opioid receptor agonist	CHRM1|CHRM2|CHRM3|CHRM4|OPRD1|OPRK1|OPRM1	-0.6937	15.3525	-1.8021
CPC006_HCT116_6H:BRD-K62965247-001-01-5:10	BRD-K62965247	tipifarnib-P2	HCT116	trt_cp	10 uM	6 h	2	142	0.5	0.269439	1	1	1	1	0	Farnesyltransferase inhibitor	FNTA|FNTB	-0.6937	15.3525	-1.8021
CPC014_ASC_24H:BRD-K64800655-001-01-7:10	BRD-K64800655	PHA-793887	ASC	trt_cp	10 uM	24 h	3	627	0.72	0.679408	0	0	1	1	0	CDK inhibitor	CDK1|CDK2|CDK4|CDK5|CCND1|CCNE1|CDK7|CDK9	-0.6935	15.3525	-1.8017
REP.A005_MCF7_24H:F20	BRD-K09090949	CP-945598	MCF7	trt_cp	3.33 uM	24 h	3	164	0.2339	0.198047	0	0	1	1	0	Cannabinoid receptor antagonist	CNR1	-0.6934	15.3525	-1.8013
NMH001_NEU_24H:BRD-K67013324-001-02-3:10	BRD-K67013324	luzindole	NEU	trt_cp	10 uM	24 h	3	498	0.29	0.384277	0	0	1	1	0	Melatonin receptor antagonist	MTNR1B|MTNR1A	-0.6932	15.3525	-1.8007
REP.B024_MCF10A_24H:I02	BRD-A76747559	rutin	MCF10A	trt_cp	0.74 uM	24 h	2	133	0.2375	0.179717	0	0	1	1	0	Antioxidant|Capillary stabilizing agent|Nitric oxide scavenger	AKR1C3|AKR1B1	-0.6932	15.3525	-1.8007
CPC014_MCF7_24H:BRD-K14681867-015-01-6:10	BRD-K14681867	somatostatin	MCF7	trt_cp	10 uM	24 h	3	188	0.4	0.277293	1	0	1	1	0	Somatostatin receptor agonist	SSTR1|SSTR2|SSTR3|SSTR4|SSTR5|GH1|GHR|OPRD1|OPRM1	-0.6929	15.3525	-1.8001
CPC006_NOMO1_6H:BRD-K01292756-001-10-2:10	BRD-K01292756	pimozide	NOMO1	trt_cp	10 uM	6 h	2	322	0.03	0.0993846	1	0	1	1	0	Dopamine receptor antagonist	DRD2|DRD3|HTR2A|CACNA1I|CALM1|DRD1|DRD4|DRD5|HRH1|HTR1A|KCNA10|KCNH2	-0.6929	15.3525	-1.8
CPC016_NPC_24H:BRD-K88759641-003-01-0:10	BRD-K88759641	EMD-84	NPC	trt_cp	10 uM	24 h	4	253	0.31	0.283186	0	0	1	1	0	Angiotensin receptor antagonist	AGTR1	-0.6929	15.3525	-1.8
REP.A001_PC3_24H:A19	BRD-K25361343	batimastat	PC3	trt_cp	10 uM	24 h	3	296	0.4422	0.365835	1	1	1	1	0	Matrix metalloprotease inhibitor	MMP1|ADAM28|ADAMTS5|MMP12|MMP16|MMP2|MMP8	-0.6927	15.3525	-1.7995
REP.B007_HELA_24H:D01	BRD-K43797669	genistein	HELA	trt_cp	2.22 uM	24 h	2	591	0.7472	0.671959	0	0	1	1	0	Tyrosine kinase inhibitor	CFTR|ESR2|EGFR|ESR1|ESRRA|ESRRB|ESRRG|NCOA1|NCOA2|PPARG|PTK2B|TOP2A|TRPC5	-0.6927	15.3525	-1.7994
CPC015_ASC_24H:BRD-K38323065-001-09-0:10	BRD-K38323065	phenacetin	ASC	trt_cp	10 uM	24 h	4	371	0.21	0.282246	0	0	1	1	0	Cyclooxygenase inhibitor	PTGS1	-0.6923	15.3525	-1.7983
LJP007_ASC.C_24H:C01	BRD-K53414658	tivozanib	ASC	trt_cp	10 uM	24 h	3	339	0.61	0.459828	1	1	1	1	0	VEGFR inhibitor	FLT1|FLT4|KDR|KIT|PDGFRA|PDGFRB	-0.6921	15.3525	-1.798
CPC005_A375_6H:BRD-K27710560-001-03-4:10	BRD-K27710560	splitomycin	A375	trt_cp	10 uM	6 h	3	212	0.41	0.29812	1	1	1	1	0	SIRT inhibitor	SIRT2|SIRT1	-0.6919	15.3525	-1.7973
CPC012_SKB_24H:BRD-K74761218-001-03-5:10	BRD-K74761218	WT-171	SKB	trt_cp	10 uM	24 h	3	205	0.18	0.194242	0	0	1	1	0	HDAC inhibitor	HDAC6	-0.6914	15.3525	-1.7962
CPC014_A549_24H:BRD-K24859147-379-01-8:10	BRD-K24859147	KIN001-242	A549	trt_cp	10 uM	24 h	3	93	0.21	0.141313	0	0	1	1	0	Protein kinase inhibitor	RPS6KA3	-0.6914	15.3525	-1.7961
LJP008_YAPC_24H:O17	BRD-A50737080	CGK-733	YAPC	trt_cp	0.12 uM	24 h	2	61	0.1004	0.0791339	1	1	1	1	0	ATM kinase inhibitor|ATR kinase inhibitor	ATM|ATR	-0.6914	15.3525	-1.796
REP.A012_JURKAT_24H:A19	BRD-K00259736	colchicine	JURKAT	trt_cp	10 uM	24 h	2	596	0.6576	0.633045	1	1	1	1	0	Tubulin inhibitor	TUBB|TUBB1|GLRA1|GLRA2|TUBA1A|TUBA1B|TUBA1C|TUBA3C|TUBA3D|TUBA3E|TUBA4A|TUBB2A|TUBB2B|TUBB3|TUBB4A|TUBB4B|TUBB6|TUBB8	-0.6912	15.3525	-1.7956
CPC017_SKB_24H:BRD-K08109516-001-02-9:10	BRD-K08109516	L-701324	SKB	trt_cp	10 uM	24 h	2	260	0.24	0.252594	0	0	1	1	0	Glutamate receptor antagonist	GRIN1|GRIN2A|GRIN2B|GRIN2C|GRIN2D	-0.691	15.3525	-1.795
REP.A027_HEK293_24H:O07	BRD-A97808748	spironolactone	HEK293	trt_cp	10 uM	24 h	3	318	0.368	0.345914	0	0	1	1	0	Mineralocorticoid receptor antagonist	NR3C2|KCNA5|KCND3|SCNN1A|AR|CACNA1A|CACNA1B|CACNA1C|CACNA1D|CACNA1F|CACNA1G|CACNA1H|CACNA1I|CACNA1S|CACNA2D1|CACNA2D2|CACNA2D3|CACNB1|CACNB2|CACNB3|CACNB4|CACNG1|CYP11B2|NR3C1|PGR|SHBG	-0.6906	15.3525	-1.794
REP.A026_HUVEC.A_24H:L19	BRD-K92093830	doxorubicin	HUVEC	trt_cp	10 uM	24 h	2	678	0.7397	0.716099	0	0	1	1	0	Topoisomerase inhibitor	TOP2A	-0.6905	15.3525	-1.7938
CPC016_NPC_24H:BRD-K56047318-001-03-0:10	BRD-K56047318	RHC-80267	NPC	trt_cp	10 uM	24 h	4	273	0.41	0.338301	0	0	1	1	0	Triacylglycerol lipase inhibitor	LIPC|LIPE|LIPG|DAGLA|DAGLB	-0.6903	15.3525	-1.7932
MOAR002_PC3_24H:L19	BRD-K32744045	disulfiram	PC3	trt_cp	10 uM	24 h	3	156	0.26	0.203648	1	1	1	1	0	Aldehyde dehydrogenase inhibitor|DNA methyltransferase inhibitor|TRPV agonist	ALDH2|ALDH1A2|ALDH5A1|ALDH7A1|CYP2E1|DNMT1|TRPA1|DBH	-0.6903	15.3525	-1.7932
REP.B008_MCF10A_24H:J24	BRD-K92731339	perindopril	MCF10A	trt_cp	0.01 uM	24 h	2	127	0.1589	0.143646	0	0	1	1	0	ACE inhibitor	ACE	-0.6901	15.3525	-1.7928
CPC017_ASC_24H:BRD-K56515112-001-03-4:10	BRD-K56515112	medrysone	ASC	trt_cp	10 uM	24 h	4	150	0.16	0.156652	1	0	1	1	0	Glucocorticoid receptor agonist	NR3C1	-0.6897	15.3525	-1.7917
REP.B028_A375_24H:H02	BRD-K93944989	safingol	A375	trt_cp	0.08 uM	24 h	2	98	0.1912	0.138416	1	1	1	1	0	PKC inhibitor	PRKCA|TRPM3	-0.689	15.3525	-1.7898
REP.A017_PC3_24H:L24	BRD-K67068943	ORE-1001	PC3	trt_cp	0.04 uM	24 h	3	176	0.13	0.152953	1	1	1	1	0	ACE inhibitor	ACE2	-0.689	15.3525	-1.7898
CPC011_MCF7_24H:BRD-A57382968-002-04-1:10	BRD-A57382968	piroxicam	MCF7	trt_cp	10 uM	24 h	2	421	0.68	0.541036	0	0	1	1	0	Cyclooxygenase inhibitor	PTGS2|PTGS1	-0.689	15.3525	-1.7898
REP.B015_HA1E_24H:M24	BRD-K60237333	niacin	HA1E	trt_cp	0.01 uM	24 h	2	163	0.2591	0.207806	1	1	1	1	0	NADPH inhibitor|Vitamin B	HCAR2|HCAR3|DGAT2|HCAR1|NNMT|QPRT	-0.6888	15.3525	-1.7894
CPC016_A549_6H:BRD-K88741031-001-01-0:10	BRD-K88741031	BRD-K88741031	A549	trt_cp	10 uM	6 h	2	79	0.27	0.147681	0	0	1	1	0	Tyrosine kinase inhibitor|EGFR inhibitor	EGFR	-0.6886	15.3525	-1.7888
CPC014_ASC_24H:BRD-K08115555-001-04-4:10	BRD-K08115555	BRD-K08115555	ASC	trt_cp	10 uM	24 h	3	463	0.08	0.19461	0	0	1	1	0	TNF inhibitor	TNF	-0.6884	15.3525	-1.7884
CPC011_A375_6H:BRD-K75958195-050-04-8:10	BRD-K75958195	pizotifen	A375	trt_cp	10 uM	6 h	3	551	0.4	0.474719	0	0	1	1	0	Serotonin receptor antagonist	HTR2A|HTR1A|HTR2C	-0.6884	15.3525	-1.7882
LJP002_MCF7_24H:N13	BRD-K91900765	VX-745	MCF7	trt_cp	0.37 uM	24 h	2	144	0.3809	0.236819	0	0	1	1	0	P38 MAPK inhibitor	MAPK14|MAPK11|MAPK12	-0.6882	15.3525	-1.7879
CPC011_MCF7_24H:BRD-K69650333-003-11-6:10	BRD-K69650333	idarubicin	MCF7	trt_cp	10 uM	24 h	2	490	0.63	0.561822	0	0	1	1	0	Topoisomerase inhibitor	TOP2A	-0.6881	15.3525	-1.7875
CPC007_VCAP_6H:I15	BRD-K43149758	myricetin	VCAP	trt_cp	10 uM	6 h	4	83	0.1602	0.116601	1	0	1	1	0	Androgen receptor agonist|Cytochrome P450 inhibitor	PIK3CG|AR|CYP3A4	-0.6879	15.3525	-1.787
CPC006_NOMO1_6H:BRD-K68336408-001-04-2:56.78	BRD-K68336408	BRD-K68336408	NOMO1	trt_cp	60 uM	6 h	2	375	0.11	0.205373	0	0	1	1	0	EGFR inhibitor	EGFR|MAPK14	-0.6878	15.3525	-1.7867
REP.A028_HEK293_24H:D03	BRD-A92826379	lupanine	HEK293	trt_cp	1.11 uM	24 h	2	111	0.2424	0.165866	0	0	1	1	0	Sodium channel inhibitor	INS	-0.6878	15.3525	-1.7866
CPC018_HT29_6H:BRD-K48869804-001-01-3:10	BRD-K48869804	icilin	HT29	trt_cp	10 uM	6 h	5	220	0.17	0.195554	1	0	1	1	0	TRPV agonist	TRPA1|TRPM8	-0.6873	4.2101	-1.7854
CPC015_ASC_24H:BRD-A01593789-001-02-3:10	BRD-A01593789	BRD-A01593789	ASC	trt_cp	10 uM	24 h	4	208	0.14	0.172554	0	0	1	1	0	5-alpha reductase inhibitor	PGR	-0.6871	3.9044	-1.785
MOAR004_PC3_24H:C22	BRD-K04972057	I-BRD9	PC3	trt_cp	10 uM	24 h	3	462	0.59	0.527931	1	1	1	1	0	Bromodomain inhibitor	BRD9	-0.687	3.6826	-1.7846
REP.B027_HA1E_24H:M08	BRD-K90868879	canagliflozin	HA1E	trt_cp	0.74 uM	24 h	2	81	0.0647	0.0732024	1	0	1	1	0	Sodium channel inhibitor	SLC5A2|SLC5A1|CYP2B6|CYP2C8	-0.6868	3.5719	-1.7842
CPC012_A549_24H:BRD-K18855837-046-01-4:10	BRD-K18855837	varenicline	A549	trt_cp	10 uM	24 h	2	732	0.54	0.635745	0	0	1	1	0	Acetylcholine receptor agonist	CHRNA4|CHRNB2|CHRNA3|CHRNA6|CHRNA7	-0.6868	3.5817	-1.7842
CPC016_SKB_24H:BRD-K53523901-001-02-8:10	BRD-K53523901	arctigenin	SKB	trt_cp	10 uM	24 h	3	176	0.26	0.216308	1	0	1	1	0	MEK inhibitor	ADIPOR1|AHR|CHUK|MAP2K1	-0.6868	3.5443	-1.7841
LJP007_HEPG2_24H:P23	BRD-K42728290	NVP-BGJ398	HEPG2	trt_cp	0.12 uM	24 h	2	133	0.4806	0.255651	0	0	1	1	0	FGFR inhibitor	FGFR1|FGFR2|FGFR3|FGFR4|KDR	-0.6867	3.4837	-1.7839
CPC011_A375_6H:BRD-K83144676-001-04-6:10	BRD-K83144676	olmesartan	A375	trt_cp	10 uM	6 h	3	109	0.04	0.0667688	1	0	1	1	0	Angiotensin receptor antagonist	AGTR1	-0.6866	3.4397	-1.7837
REP.B027_HELA_24H:O12	BRD-A97808748	spironolactone	HELA	trt_cp	0.01 uM	24 h	2	108	0.3318	0.191417	1	1	1	1	0	Mineralocorticoid receptor antagonist	NR3C2|KCNA5|KCND3|SCNN1A|AR|CACNA1A|CACNA1B|CACNA1C|CACNA1D|CACNA1F|CACNA1G|CACNA1H|CACNA1I|CACNA1S|CACNA2D1|CACNA2D2|CACNA2D3|CACNB1|CACNB2|CACNB3|CACNB4|CACNG1|CYP11B2|NR3C1|PGR|SHBG	-0.6866	3.4505	-1.7837
REP.B011_HUVEC.A_24H:L01	BRD-K06900071	tebipenem	HUVEC	trt_cp	2.22 uM	24 h	2	206	0.0959	0.142126	0	0	1	1	0	Bacterial cell wall synthesis inhibitor	CNR1	-0.6865	3.3925	-1.7834
CPC014_ASC_24H:BRD-K52911425-001-02-3:10	BRD-K52911425	GDC-0941	ASC	trt_cp	10 uM	24 h	3	333	0.53	0.424806	0	0	1	1	0	PI3K inhibitor	PIK3CG|PIK3CA|PIK3CB|PIK3CD	-0.6865	3.374	-1.7833
REP.B013_JURKAT_24H:P23	BRD-K44353683	nateglinide	JURKAT	trt_cp	0.03 uM	24 h	2	129	0.1258	0.128815	0	0	1	1	0	Insulin secretagogue	ABCC8|KCNJ11|CYP3A4|INS|KCNJ10|PPARG	-0.6859	3.1733	-1.7819
CPC007_PC3_24H:BRD-A28422330-001-07-7:10	BRD-A28422330	ML-141	PC3	trt_cp	10 uM	24 h	4	131	0.09	0.109796	0	0	1	1	0	CDC inhibitor	CDC42	-0.6859	3.1798	-1.7819
REP.A011_HA1E_24H:J01	BRD-K06335600	tizanidine	HA1E	trt_cp	10 uM	24 h	3	251	0.4357	0.334396	0	0	1	1	0	Adrenergic receptor agonist	CYP1A2|ADRA2A|ADRA2B|ADRA2C|NISCH	-0.6855	3.0688	-1.7808
REP.B022_YAPC_24H:E20	BRD-K70330367	amantadine	YAPC	trt_cp	0.74 uM	24 h	2	139	0.0925	0.114659	0	0	1	1	0	Glutamate receptor antagonist	GRIN1|DRD2|GRIN2A|GRIN2B|GRIN2C|GRIN2D|GRIN3A	-0.6854	3.0531	-1.7806
CPC004_HCC515_6H:BRD-K42748308-300-01-2:10	BRD-K42748308	XE-991	HCC515	trt_cp	10 uM	6 h	3	609	0.31	0.43936	1	0	1	1	0	Potassium channel antagonist	KCNQ1|KCNQ2|KCNQ3|KCNQ4|KCNQ5	-0.6854	3.0464	-1.7805
CPC015_SKB_24H:BRD-K07996107-001-03-3:10	BRD-K07996107	harpagoside	SKB	trt_cp	10 uM	24 h	2	70	0.14	0.100102	0	0	1	1	0	Acetylcholinesterase inhibitor	NOS2|PTGS2	-0.6854	3.0472	-1.7805
CPC013_HCC515_6H:BRD-A45664787-001-01-4:10	BRD-A45664787	iloprost	HCC515	trt_cp	10 uM	6 h	3	246	0.32	0.283709	0	0	1	1	0	Platelet aggregation inhibitor|Prostanoid receptor agonist	PTGIR|PTGER1|PTGER2|PDE4A|PDE4B|PDE4C|PDE4D|PLAT|PTGDR|PTGER3|PTGER4|PTGFR|TBXA2R	-0.6854	3.0391	-1.7804
REP.A017_JURKAT_24H:H23	BRD-A64553394	DPI-201106	JURKAT	trt_cp	0.125 uM	24 h	2	202	0.2668	0.234747	0	0	1	1	0	Sodium channel activator	ADRB2	-0.6853	3.0301	-1.7803
CPC006_NOMO1_6H:BRD-K23363278-001-01-3:1	BRD-K23363278	CYT-997	NOMO1	trt_cp	1.11 uM	6 h	2	398	0.32	0.360867	0	0	1	1	0	Tubulin inhibitor	TUBB	-0.6853	3.0199	-1.7802
CPC013_NEU_24H:BRD-K82164249-001-01-9:10	BRD-K82164249	andarine	NEU	trt_cp	10 uM	24 h	2	59	0.28	0.129968	0	0	1	1	0	Androgen receptor antagonist	AR	-0.6852	3.0039	-1.78
REP.A022_MCF10A_24H:L20	BRD-K68488863	ENMD-2076	MCF10A	trt_cp	3.33 uM	24 h	2	221	0.3287	0.272538	0	0	1	1	0	Aurora kinase inhibitor|FLT3 inhibitor|VEGFR inhibitor	AURKA|FLT3|KDR|PDGFRA|SRC|CSF1R|EPHA1|FGFR1|FGFR2|FGFR3|FLT4|KIT|PTK2	-0.6851	2.9904	-1.7798
CPC018_A549_24H:BRD-K13261168-001-01-4:10	BRD-K13261168	LY-16350	A549	trt_cp	10 uM	24 h	2	63	0.16	0.101522	0	0	1	1	0	Dopamine receptor agonist	DRD2|DRD3	-0.6849	2.9573	-1.7793
PCLB003_A549_24H:BRD-K53665955-001-01-4:10	BRD-K53665955	MK-5108	A549	trt_cp	10 uM	24 h	3	305	0.4	0.353192	1	1	1	1	0	Aurora kinase inhibitor	AURKA|AURKB|AURKC	-0.6845	2.8924	-1.7783
REP.A025_HA1E_24H:L23	BRD-K77641333	naphazoline	HA1E	trt_cp	0.125 uM	24 h	3	93	0.1927	0.135367	1	0	1	1	0	Adrenergic receptor agonist	ADRA1A|ADRA2A	-0.6845	2.8834	-1.7781
REP.A005_A549_24H:A14	BRD-A07986123	galeterone	A549	trt_cp	3.33 uM	24 h	3	114	0.2188	0.159701	0	0	1	1	0	Androgen receptor antagonist	AR|CYP17A1	-0.6843	2.8592	-1.7777
CPC017_NPC_24H:BRD-K09549677-300-01-8:10	BRD-K09549677	mibefradil	NPC	trt_cp	10 uM	24 h	2	638	0.74	0.694795	0	0	1	1	0	Calcium channel blocker	CACNA1H|CACNA1G|CACNA1C|CACNA1I|SCN2A|SCN4A|SCN5A|SCN9A|ANO1|CACNA1D|CACNA1F|CACNA1S|CACNB1|CACNB2|CACNB3|CACNB4|CATSPER1|CATSPER2|CATSPER3|CATSPER4	-0.6843	2.8625	-1.7777
REP.A019_HELA_24H:P20	BRD-K53508936	CTS-1027	HELA	trt_cp	3.33 uM	24 h	2	365	0.4333	0.402135	0	0	1	1	0	Metalloproteinase inhibitor	MMP13|MMP2|MMP3|MMP9|MMP12|MMP14|MMP8|MMP1	-0.6842	2.848	-1.7774
CPC017_ASC_24H:BRD-K13533483-001-03-0:10	BRD-K13533483	cyclosporin-a	ASC	trt_cp	10 uM	24 h	4	203	0.21	0.20878	1	0	1	1	0	Calcineurin inhibitor	PPIA|CYP3A5|CYP3A7|PPID|ABCB11|CAMLG|FPR1|PPIF|PPP3R2|SLC10A1|SLCO1B1|SLCO1B3	-0.6841	2.8314	-1.7771
CPC006_NOMO1_6H:BRD-K34581968-001-01-2:11.1	BRD-K34581968	BMS-536924	NOMO1	trt_cp	12 uM	6 h	2	100	0.58	0.243526	1	1	1	1	0	IGF-1 inhibitor	IGF1R|INSR|AKT1|CCNE1|CDK2|CYP3A4|ERBB2|KDR|LCK|MAPK1|MET|PDGFRA|PDGFRB	-0.6834	2.752	-1.7753
CPC017_NPC_24H:BRD-K14441456-001-01-2:10	BRD-K14441456	BRD-K14441456	NPC	trt_cp	10 uM	24 h	4	329	0.42	0.375883	0	0	1	1	0	EGFR inhibitor	EGFR	-0.6832	2.7317	-1.7748
CPC015_ASC_24H:BRD-A68009927-003-02-9:10	BRD-A68009927	daunorubicin	ASC	trt_cp	10 uM	24 h	4	660	0.73	0.701882	0	0	1	1	0	RNA synthesis inhibitor|Topoisomerase inhibitor	TOP2A|TOP2B	-0.6831	2.7228	-1.7746
CPC016_HEPG2_6H:BRD-K97061094-001-03-2:10	BRD-K97061094	azacyclonol	HEPG2	trt_cp	10 uM	6 h	3	108	0.05	0.0743066	0	0	1	1	0	Histamine receptor antagonist	HRH1	-0.683	2.7169	-1.7744
REP.B007_YAPC_24H:C01	BRD-K43723251	chenodiol	YAPC	trt_cp	2.22 uM	24 h	2	108	0.3852	0.206246	1	1	1	1	0	11-beta-HSD1 inhibitor	HSD11B1	-0.683	2.7088	-1.7742
CPC006_THP1_6H:G06	BRD-K67566344	KU-0063794	THP1	trt_cp	10 uM	6 h	2	613	0.0168	0.102616	0	0	1	1	0	MTOR inhibitor	MTOR	-0.6828	2.6927	-1.7737
CPC006_NOMO1_6H:BRD-K67566344-001-01-8:10	BRD-K67566344	KU-0063794	NOMO1	trt_cp	10 uM	6 h	2	277	0.22	0.249621	0	0	1	1	0	MTOR inhibitor	MTOR	-0.6825	2.6697	-1.7731
REP.A024_MCF7_24H:L14	BRD-K78055238	LY-2090314	MCF7	trt_cp	3.33 uM	24 h	2	356	0.648	0.485672	1	1	1	1	0	GSK inhibitor	GSK3B	-0.6824	2.657	-1.7727
CPC017_A375_6H:BRD-K29555132-001-02-2:10	BRD-K29555132	arachidonamide	A375	trt_cp	10 uM	6 h	3	125	0.13	0.128901	0	0	1	1	0	Cannabinoid receptor agonist	CNR1|CNR2	-0.6824	2.6583	-1.7727
CPC004_VCAP_24H:P17	BRD-A55913614	primaquine	VCAP	trt_cp	10 uM	24 h	6	239	0.08	0.139822	0	0	1	1	0	Antimalarial|DNA inhibitor	KRT7|NQO2	-0.6821	2.6333	-1.772
MOAR005_PC3_24H:I01	BRD-K91106808	SU-16f	PC3	trt_cp	10 uM	24 h	3	281	0.48	0.371368	1	1	1	1	0	PDGFR inhibitor	PDGFRB	-0.6819	2.6209	-1.7715
REP.B018_YAPC_24H:N23	BRD-K66911501	MK-3207	YAPC	trt_cp	0.03 uM	24 h	2	240	0.346	0.29139	0	0	1	1	0	Calcitonin antagonist	CALCA|CALCRL|RAMP1	-0.6815	2.5924	-1.7705
POL001_HT29_24H:I20	BRD-K04853698	LDN-193189	HT29	trt_cp	3.33 uM	24 h	2	306	0.58	0.425996	1	1	1	1	0	Serine/threonine kinase inhibitor	ACVR1|BMPR1A	-0.6816	2.5937	-1.7705
LJP002_SKBR3_6H:BRD-K95435023-001-03-6:10	BRD-K95435023	PHA-665752	SKBR3	trt_cp	10 uM	6 h	3	331	0.22	0.27287	0	0	1	1	0	MET inhibitor	MET	-0.6814	2.5866	-1.7703
NMH002_NEU_24H:BRD-K76723084-001-19-0:10	BRD-K76723084	isotretinoin	NEU	trt_cp	10 uM	24 h	3	67	0.25	0.130869	0	0	1	1	0	Retinoid receptor agonist	CYP2B6|CYP2C19|CYP2C8|CYP3A5|CYP3A7|RARA|RARB|RARG	-0.6807	2.541	-1.7684
CPC014_HCC515_6H:BRD-K85985071-001-20-7:10	BRD-K85985071	ellipticine	HCC515	trt_cp	10 uM	6 h	3	250	0.36	0.303355	1	1	1	1	0	Topoisomerase inhibitor	TOP2A|TOP2B	-0.6804	2.5209	-1.7675
CPC006_H1299_6H:BRD-K83213911-001-02-8:80	BRD-K83213911	PF-750	H1299	trt_cp	80 uM	6 h	2	234	0.56	0.366043	0	0	1	1	0	FAAH inhibitor	FAAH	-0.6803	2.5137	-1.7672
REP.A013_YAPC_24H:E01	BRD-K38436528	imipramine	YAPC	trt_cp	10 uM	24 h	3	114	0.2499	0.170674	1	0	1	1	0	Norepinephrine inhibitor|Serotonin reuptake inhibitor	SLC6A2|SLC6A4|CHRM2|CYP2C19|ADRA1A|ADRA1B|ADRA1D|CHRM1|CHRM3|CHRM4|CHRM5|DRD1|DRD2|DRD5|HRH1|HTR1A|HTR2A|HTR2C|HTR6|HTR7|KCND2|KCND3|KCNH1|KCNH2|SLC6A3	-0.6801	2.5032	-1.7667
REP.B010_HT29_24H:O24	BRD-K15426076	iguratimod	HT29	trt_cp	0.01 uM	24 h	2	245	0.4803	0.346873	1	1	1	1	0	Cyclooxygenase inhibitor|NFKB inhibitor	PTGS2	-0.6798	2.4884	-1.766
CPC006_THP1_6H:L05	BRD-K91623615	ABT-751	THP1	trt_cp	10 uM	6 h	2	403	0.268	0.332315	0	0	1	1	0	Tubulin inhibitor	TUBB	-0.6796	2.4768	-1.7654
REP.B020_MCF10A_24H:B17	BRD-K83186168	AZD-1981	MCF10A	trt_cp	0.03 uM	24 h	2	138	0.0547	0.0878545	0	0	1	1	0	CRTH receptor antagonist	PTGDR2	-0.6792	2.4577	-1.7644
CPC016_A375_6H:BRD-K46441700-300-01-4:10	BRD-K46441700	GR-55562	A375	trt_cp	10 uM	6 h	5	193	0.27	0.230829	0	0	1	1	0	Serotonin receptor antagonist	HTR1B	-0.6792	2.4585	-1.7644
CPC006_AGS_6H:BRD-K56343971-001-02-3:10	BRD-K56343971	vemurafenib	AGS	trt_cp	10 uM	6 h	2	216	0.48	0.325595	1	1	1	1	0	RAF inhibitor	BRAF|CYP2C19|CYP3A4|CYP3A5|RAF1	-0.679	2.45	-1.764
REP.A023_THP1_24H:L21	BRD-K71164191	KD-023	THP1	trt_cp	1.11 uM	24 h	2	114	0.0617	0.0848058	0	0	1	1	0	ACAT inhibitor	ACACA|ACACB|CHAT	-0.6788	2.4397	-1.7634
REP.A017_JURKAT_24H:O14	BRD-K67080878	milrinone	JURKAT	trt_cp	3.33 uM	24 h	2	213	0.2274	0.222544	0	0	1	1	0	Phosphodiesterase inhibitor	PDE3A|PDE2A|PDE3B|PDE5A	-0.6787	2.4365	-1.7632
REP.A021_HT29_24H:C07	BRD-K81458380	CX-4945	HT29	trt_cp	10 uM	24 h	3	237	0.447	0.329123	1	1	1	1	0	Casein kinase inhibitor	CSNK2A1|CSNK2A2|CSNK2B|DAPK3|HIPK3	-0.6782	2.4154	-1.7619
REP.B013_PC3_24H:E03	BRD-K38436528	imipramine	PC3	trt_cp	0.25 uM	24 h	2	79	0.2944	0.15421	0	0	1	1	0	Norepinephrine inhibitor|Serotonin reuptake inhibitor	SLC6A2|SLC6A4|CHRM2|CYP2C19|ADRA1A|ADRA1B|ADRA1D|CHRM1|CHRM3|CHRM4|CHRM5|DRD1|DRD2|DRD5|HRH1|HTR1A|HTR2A|HTR2C|HTR6|HTR7|KCND2|KCND3|KCNH1|KCNH2|SLC6A3	-0.6775	2.384	-1.7599
CPC006_SW480_6H:BRD-A41451487-001-06-2:160	BRD-A41451487	PK-11195	SW480	trt_cp	150 uM	6 h	2	57	0.06	0.0591349	0	0	1	1	0	Benzodiazepine receptor antagonist	TSPO|NR1I2|NR1I3	-0.6769	2.3625	-1.7584
REP.A004_HEK293_24H:P08	BRD-A26423207	sparfloxacin	HEK293	trt_cp	3.33 uM	24 h	3	201	0.4102	0.290353	0	0	1	1	0	Bacterial DNA Gyrase inhibitor	TOP2A	-0.6767	2.3569	-1.758
REP.A017_PC3_24H:A16	BRD-A50764878	MDL-73005EF	PC3	trt_cp	0.37 uM	24 h	3	130	0.0657	0.0934512	1	0	1	1	0	Serotonin receptor antagonist	HTR1A	-0.6767	2.3541	-1.7578
LKCP002_MCF7_24H:O24	BRD-K17513304	firategrast	MCF7	trt_cp	0.12 uM	24 h	4	210	0.3608	0.278339	1	1	1	1	0	Integrin inhibitor	ITGA4|ITGB1|ITGB7	-0.6766	2.3514	-1.7576
CPC019_HA1E_6H:BRD-K98426715-001-01-9:10	BRD-K98426715	tubacin	HA1E	trt_cp	10 uM	6 h	3	239	0.32	0.279643	1	0	1	1	0	HDAC inhibitor	HDAC6	-0.6764	2.3456	-1.7571
CPD001_PC3_24H:BRD-K37249724-001-20-8:10	BRD-K37249724	astemizole	PC3	trt_cp	10 uM	24 h	3	229	0.35	0.286274	1	1	1	1	0	Histamine receptor antagonist	HRH1|KCNH2|CYP2J2|CYP3A5|KCNH1	-0.6763	2.3437	-1.757
CPC011_A375_6H:BRD-K02227374-003-04-8:10	BRD-K02227374	milnacipran	A375	trt_cp	10 uM	6 h	3	572	0.28	0.404676	0	0	1	1	0	Serotonin receptor antagonist	SLC6A2|SLC6A4|GRIN1|GRIN2A|GRIN2B|GRIN2C|GRIN2D|GRIN3A|GRIN3B	-0.6758	2.3267	-1.7556
CPC016_NEU_24H:BRD-K06543683-066-01-3:10	BRD-K06543683	bisindolylmaleimide-ix	NEU	trt_cp	10 uM	24 h	3	478	0.65	0.563639	0	0	1	1	0	PKC inhibitor	SIRT1|LRRK2|SIRT2|AKT1|GSK3B|LCK|MAPK1|MAPK11|MAPK12|MAPK14|MAPK8|PRKCA|ROCK1|RPS6KB1	-0.6757	2.3235	-1.7554
REP.A025_A375_24H:K02	BRD-K76210423	resiquimod	A375	trt_cp	3.33 uM	24 h	3	90	0.148	0.116703	1	0	1	1	0	TLR agonist	TLR7|TLR8	-0.6757	2.321	-1.7552
CPC016_NPC_24H:BRD-K22010301-001-01-2:10	BRD-K22010301	JLK-6	NPC	trt_cp	10 uM	24 h	4	143	0.09	0.114715	0	0	1	1	0	Gamma secretase inhibitor|Beta amyloid inhibitor	PSEN1	-0.6754	2.312	-1.7545
CPC018_ASC_24H:BRD-K32501161-300-04-7:10	BRD-K32501161	vanoxerine	ASC	trt_cp	10 uM	24 h	3	292	0.23	0.262051	1	0	1	1	0	Dopamine receptor antagonist	SLC6A3|MAOA|MAOB	-0.6752	2.3063	-1.754
CPC016_NEU_24H:BRD-K07762753-001-02-8:10	BRD-K07762753	aminopurvalanol-a	NEU	trt_cp	10 uM	24 h	3	298	0.58	0.42039	0	0	1	1	0	Tyrosine kinase inhibitor|CDK inhibitor	CDK2|CDK1|CDK5|CDK6	-0.6752	2.3066	-1.754
CPC005_A549_24H:BRD-K99946902-001-06-7:10	BRD-K99946902	hexylresorcinol	A549	trt_cp	10 uM	24 h	3	215	0.25	0.234434	1	0	1	1	0	Anesthetic - local	TYR	-0.6751	2.3041	-1.7538
CPC006_U937_6H:BRD-K28907958-001-02-7:11.1	BRD-K28907958	CD-437	U937	trt_cp	12 uM	6 h	2	273	0.1	0.167075	1	0	1	1	0	Retinoid receptor agonist	RARG	-0.675	2.3006	-1.7535
REP.A025_HA1E_24H:M13	BRD-K78303961	glycitein	HA1E	trt_cp	10 uM	24 h	3	86	0.2432	0.146238	1	1	1	1	0	TNF inhibitor	TNF|APP|IL1B	-0.675	2.3009	-1.7535
CPC015_SKB_24H:BRD-K23913458-001-13-2:10	BRD-K23913458	coumarin	SKB	trt_cp	10 uM	24 h	2	92	0.21	0.140551	0	0	1	1	0	Vitamin K antagonist	CA1|CA12|CA14|CA2|CA4|CA6|CA9|CYP2A6	-0.6749	2.2971	-1.7532
LUNG001_A549_24H:BRD-K37130656:10	BRD-K37130656	rivaroxaban	A549	trt_cp	10 uM	24 h	2	88	0.1065	0.0978919	1	0	1	1	0	Coagulation factor inhibitor	F10|CYP2J2|CYP3A5	-0.6746	2.2904	-1.7525
REP.A014_HEK293_24H:P19	BRD-K41731458	triclosan	HEK293	trt_cp	10 uM	24 h	3	559	0.6758	0.621506	0	0	1	1	0	Enoyl-[acyl-carrier-protein] reductase [NADH] inhibitor	DNMT1	-0.6746	2.2896	-1.7524
CPC013_HCC515_6H:BRD-K71512533-001-01-7:10	BRD-K71512533	SNS-314	HCC515	trt_cp	10 uM	6 h	3	72	0.21	0.124339	1	0	1	1	0	Aurora kinase inhibitor	AURKA|AURKB|AURKC	-0.6739	2.2727	-1.7507
CPC001_HA1E_6H:BRD-K84595254-001-03-0:10	BRD-K84595254	strophanthidin	HA1E	trt_cp	10 uM	6 h	3	471	0.48	0.480797	1	1	1	1	0	Na/K-ATPase inhibitor	ATP1A1	-0.6738	2.2697	-1.7503
REP.B020_MDAMB231_24H:A17	BRD-A83081521	finasteride	MDAMB231	trt_cp	0.03 uM	24 h	2	218	0.29	0.254248	0	0	1	1	0	5-alpha reductase inhibitor	SRD5A2|SRD5A1|AR|AKR1D1	-0.6738	2.2698	-1.7503
CPC016_NPC_24H:BRD-K82731415-001-05-4:10	BRD-K82731415	olomoucine	NPC	trt_cp	10 uM	24 h	4	296	0.36	0.330086	0	0	1	1	0	CDK inhibitor	CDK1|CDK2|CDK5|MAPK1	-0.6735	2.2644	-1.7495
REP.B011_PC3_24H:F01	BRD-A05186015	bupropion	PC3	trt_cp	2.22 uM	24 h	2	138	0.4397	0.249085	0	0	1	1	0	Dopamine receptor antagonist	SLC6A2|SLC6A3|CYP2B6|CHRNA3	-0.6732	2.259	-1.7487
REP.B018_MCF7_24H:I01	BRD-K64622987	torcetrapib	MCF7	trt_cp	2.22 uM	24 h	2	167	0.3925	0.258886	1	1	1	1	0	Cholesteryl ester transfer protein inhibitor	CETP	-0.673	2.2568	-1.7483
CPC005_HCC515_6H:BRD-K67783091-001-17-0:10	BRD-K67783091	haloperidol	HCC515	trt_cp	10 uM	6 h	2	105	0.15	0.126903	1	1	1	1	0	Dopamine receptor antagonist	DRD2|DRD3|HTR2A|DRD1|DRD4|CYP3A7|DRD5|GRIN2B|HRH1|HTR1A|HTR1D|HTR2B|HTR7|KCNH1	-0.6729	2.255	-1.748
CPC018_SKB_24H:BRD-A00758722-001-03-1:10	BRD-A00758722	noretynodrel	SKB	trt_cp	10 uM	24 h	3	385	0.34	0.365848	0	0	1	1	0	Progestogen hormone	PGR	-0.6728	2.2542	-1.7478
CPC016_MCF7_24H:BRD-A18579359-001-02-3:10	BRD-A18579359	wiskostatin	MCF7	trt_cp	10 uM	24 h	4	211	0.28	0.245782	1	1	1	1	0	Neural Wiskott-Aldrich syndrome protein inhibitor	WAS|WASL	-0.6725	2.25	-1.747
REP.A014_YAPC_24H:G01	BRD-K59227464	LY-2228820	YAPC	trt_cp	10 uM	24 h	3	186	0.4044	0.277327	1	1	1	1	0	P38 MAPK inhibitor	MAPK14	-0.6724	2.249	-1.7467
REP.A001_A549_24H:N06	BRD-A29623586	anisodamine	A549	trt_cp	0.04 uM	24 h	2	155	0.3129	0.222689	0	0	1	1	0	Lipid peroxidase inhibitor	TNF|ADRA1A	-0.6722	2.247	-1.7462
CPC011_MCF7_24H:BRD-K70883034-001-02-5:10	BRD-K70883034	nimetazepam	MCF7	trt_cp	10 uM	24 h	2	365	0.16	0.244364	0	0	1	1	0	GABA receptor agonist	GABRA1|GABRA2	-0.6721	2.2459	-1.7459
CPC006_NOMO1_6H:BRD-K49371609-310-01-1:0.09	BRD-K49371609	PIK-75	NOMO1	trt_cp	0.08 uM	6 h	2	431	0.47	0.455112	0	0	1	1	0	PI3K inhibitor	PIK3CA|PIK3CB|PIK3CD|PIK3CG|PRKDC	-0.6719	2.2448	-1.7456
REP.A007_HELA_24H:A08	BRD-K41772907	tolimidone	HELA	trt_cp	3.33 uM	24 h	3	133	0.1905	0.160955	1	0	1	1	0	Src activator	LYN|SRC	-0.6718	2.2436	-1.7452
REP.A002_HA1E_24H:D19	BRD-K16295392	atrasentan	HA1E	trt_cp	10 uM	24 h	3	75	0.1683	0.113607	1	1	1	1	0	Endothelin receptor antagonist	EDNRA	-0.6718	2.2436	-1.7452
REP.A015_MCF7_24H:F17	BRD-K57041787	dabigatran-etexilate	MCF7	trt_cp	0.125 uM	24 h	2	763	0.6082	0.688836	0	0	1	1	0	Thrombin inhibitor|Serine protease inhibitor	F2	-0.6716	2.2417	-1.7448
CPD001_PC3_24H:BRD-K15014948-001-07-9:10	BRD-K15014948	tranexamic-acid	PC3	trt_cp	10 uM	24 h	3	340	0.06	0.144426	1	0	1	1	0	Fibrinogen stimulant|Plasminogen activator inhibitor	PLG|FGA|FGB|FGG|PLAT	-0.6716	2.2417	-1.7448
REP.B015_HELA_24H:B24	BRD-K55930204	phenytoin	HELA	trt_cp	0.01 uM	24 h	2	76	0.1045	0.0901147	1	1	1	1	0	Hydantoin antiepileptic	SCN1A|SCN2A|SCN5A|ABCB1|CYP2B6|CYP2C19|CYP3A4|SCN10A|SCN11A|SCN3A|SCN4A|SCN7A|SCN8A|SCN9A	-0.6715	2.2407	-1.7445
REP.A012_HELA_24H:M07	BRD-A02990301	lofexidine	HELA	trt_cp	10 uM	24 h	2	152	0.3633	0.237621	1	1	1	1	0	Adrenergic receptor agonist	ADRA2A	-0.6715	2.2405	-1.7444
CPC006_NOMO1_6H:BRD-K56343971-001-02-3:10	BRD-K56343971	vemurafenib	NOMO1	trt_cp	10 uM	6 h	2	527	0.14	0.274663	0	0	1	1	0	RAF inhibitor	BRAF|CYP2C19|CYP3A4|CYP3A5|RAF1	-0.6713	2.2372	-1.7438
REP.A008_PC3_24H:N01	BRD-A87983072	benzotript	PC3	trt_cp	10 uM	24 h	2	93	0.2521	0.154831	0	0	1	1	0	CCK receptor antagonist	CCKBR|CCKAR	-0.6712	2.237	-1.7437
REP.A010_HELA_24H:C01	BRD-K12423485	griseofulvin	HELA	trt_cp	10 uM	24 h	3	260	0.5133	0.369405	0	0	1	1	0	Tubulin inhibitor	KRT12	-0.6706	2.2293	-1.7422
REP.B018_A375_24H:F22	BRD-K63504947	semaxanib	A375	trt_cp	0.08 uM	24 h	2	150	0.4254	0.255432	0	0	1	1	0	VEGFR inhibitor	KDR|FLT1|KIT|PDGFRB|FLT3|MET|FGFR1|PDGFRA|RET	-0.6706	2.2291	-1.7421
LJP009_CD34_24H:A21	BRD-A10523515	GSK-429286A	CD34	trt_cp	1.11 uM	24 h	3	234	0.5054	0.347741	1	1	1	1	0	Rho associated kinase inhibitor	ROCK1	-0.6705	2.2281	-1.7419
REP.B007_HELA_24H:F01	BRD-A37288617	amfepramone	HELA	trt_cp	2.22 uM	24 h	2	467	0.6775	0.568779	0	0	1	1	0	Adrenergic receptor agonist	SLC6A2|SLC6A3	-0.6705	2.2281	-1.7419
REP.B019_HELA_24H:N03	BRD-K49671696	ketanserin	HELA	trt_cp	0.25 uM	24 h	2	121	0.3761	0.215712	1	1	1	1	0	Serotonin receptor antagonist	HTR2A|HTR2C|ADRA1A|ADRA1B|ADRA1D|DRD1|DRD5|HTR1A|HTR1B|HTR1D|HTR2B|HTR5A|HTR7|SLC18A1|SLC18A2	-0.6704	2.2271	-1.7417
CPC013_HA1E_6H:BRD-K47832606-001-13-7:10	BRD-K47832606	floxuridine	HA1E	trt_cp	10 uM	6 h	3	97	0.13	0.11355	0	0	1	1	0	DNA synthesis inhibitor	TYMS	-0.6703	2.2255	-1.7414
CPC006_NCIH596_6H:BRD-K56343971-001-02-3:10	BRD-K56343971	vemurafenib	NCIH596	trt_cp	10 uM	6 h	2	148	0.43	0.255091	1	1	1	1	0	RAF inhibitor	BRAF|CYP2C19|CYP3A4|CYP3A5|RAF1	-0.67	2.2216	-1.7406
CPC014_A375_6H:D06	BRD-K52911425	GDC-0941	A375	trt_cp	10 uM	6 h	2	150	0.4	0.247689	1	1	1	1	0	PI3K inhibitor	PIK3CG|PIK3CA|PIK3CB|PIK3CD	-0.6699	2.2204	-1.7404
REP.A006_PC3_24H:C13	BRD-K19462402	buflomedil	PC3	trt_cp	10 uM	24 h	3	126	0.2746	0.18809	1	0	1	1	0	Adrenergic receptor antagonist|Calcium channel blocker	CACNA1C|ADRA1A	-0.6699	2.2199	-1.7403
CPC018_SKB_24H:BRD-A52530684-001-01-1:10	BRD-A52530684	doxorubicin	SKB	trt_cp	10 uM	24 h	3	546	0.7	0.625138	0	0	1	1	0	Topoisomerase inhibitor	TOP2A	-0.6696	2.2159	-1.7394
LJP007_HEPG2_24H:N13	BRD-K42805893	AZD-9291	HEPG2	trt_cp	10 uM	24 h	2	270	0.5977	0.406213	0	0	1	1	0	EGFR inhibitor	EGFR	-0.6695	2.2147	-1.7392
CPC011_A375_6H:BRD-K97752965-001-10-7:10	BRD-K97752965	nicorandil	A375	trt_cp	10 uM	6 h	3	549	0.25	0.374616	0	0	1	1	0	Nitric oxide donor|Potassium channel activator	ABCC9|KCNJ8|KCNJ11	-0.6695	2.2147	-1.7392
REP.A010_A375_24H:E14	BRD-A12994259	pomalidomide	A375	trt_cp	3.33 uM	24 h	3	204	0.3857	0.283642	0	0	1	1	0	Angiogenesis inhibitor|TNF inhibitor	CRBN|TNF|CYP2C19|PTGS2	-0.6692	2.2101	-1.7385
CPC009_HEPG2_6H:BRD-K27721098-001-07-3:10	BRD-K27721098	clopidogrel	HEPG2	trt_cp	10 uM	6 h	3	309	0.45	0.377065	1	1	1	1	0	Purinergic receptor antagonist	P2RY12|CYP2B6|CYP2C19|CYP3A5	-0.6692	2.2094	-1.7384
CPC014_ASC_24H:BRD-K79437791-001-03-2:10	BRD-K79437791	BRD-K79437791	ASC	trt_cp	10 uM	24 h	3	161	0.07	0.107348	1	0	1	1	0	Inhibitor of methylation of endogenous isoprenylated proteins	PPARG	-0.6688	2.2028	-1.7374
CPC015_ASC_24H:BRD-A97674275-001-04-3:10	BRD-A97674275	ranolazine	ASC	trt_cp	10 uM	24 h	4	160	0.32	0.228805	0	0	1	1	0	Sodium channel inhibitor	SCN5A|SCN9A|SLC22A2|SCN10A|SCN4A	-0.6687	2.2018	-1.7373
REP.B005_A375_24H:C10	BRD-K08252256	diclofenac	A375	trt_cp	0.08 uM	24 h	3	65	0.2058	0.116953	1	0	1	1	0	Cyclooxygenase inhibitor	PTGS1|PTGS2|CYP2C8|AKR1C3|ALOX5|ASIC1|ASIC3|KCNQ2|KCNQ3|PLA2G2A|PPARG|SCN4A	-0.6687	2.2005	-1.7371
REP.B023_YAPC_24H:A19	BRD-K68065987	MK-2206	YAPC	trt_cp	2.22 uM	24 h	2	265	0.384	0.322566	1	1	1	1	0	AKT inhibitor	AKT1|AKT2|AKT3	-0.6685	2.1964	-1.7366
CPD002_PC3_6H:BRD-K90574421-001-02-7:10	BRD-K90574421	ipsapirone	PC3	trt_cp	10 uM	6 h	3	216	0.28	0.248677	0	0	1	1	0	Serotonin receptor agonist	HTR1A	-0.6685	2.1965	-1.7366
CPC014_ASC_24H:BRD-A74904029-001-05-7:10	BRD-A74904029	EI-231	ASC	trt_cp	10 uM	24 h	3	546	0.35	0.442039	0	0	1	1	0	Casein kinase inhibitor	CSNK2A1	-0.6676	2.1759	-1.7342
CPC018_A549_24H:BRD-K01648091-001-01-8:10	BRD-K01648091	LE-300	A549	trt_cp	10 uM	24 h	2	84	0.08	0.0828925	0	0	1	1	0	Dopamine receptor antagonist	DRD5	-0.6675	2.1743	-1.7341
CPC018_SKB_24H:BRD-K25433859-003-14-8:10	BRD-K25433859	maprotiline	SKB	trt_cp	10 uM	24 h	3	147	0.46	0.262947	0	0	1	1	0	Norepinephrine inhibitor|Tricyclic antidepressant	SLC6A2|ADRA1A|ADRA1B|ADRA1D|ADRA2A|ADRA2B|ADRA2C|CHRM1|CHRM2|CHRM3|CHRM4|CHRM5|DRD2|HRH1|HTR2A|HTR2C|HTR7	-0.6675	2.1745	-1.7341
CPC015_ASC_24H:BRD-K51350053-048-06-6:10	BRD-K51350053	toremifene	ASC	trt_cp	10 uM	24 h	4	370	0.24	0.301326	0	0	1	1	0	Selective estrogen receptor modulator (SERM)|Estrogen receptor antagonist	ESR1|CYP3A5	-0.6673	2.1689	-1.7335
CPC014_SKB_24H:BRD-K72420232-001-02-4:10	BRD-K72420232	WZ-4002	SKB	trt_cp	10 uM	24 h	4	373	0.46	0.418855	0	0	1	1	0	EGFR inhibitor	EGFR|ERBB2	-0.6672	2.1654	-1.7332
REP.B005_YAPC_24H:P11	BRD-K11267252	alectinib	YAPC	trt_cp	0.03 uM	24 h	2	201	0.2713	0.236131	1	0	1	1	0	ALK inhibitor	ALK|MET	-0.6672	2.1657	-1.7332
REP.B021_HEK293_24H:P22	BRD-K86882815	cabergoline	HEK293	trt_cp	0.08 uM	24 h	2	155	0.0322	0.0714372	0	0	1	1	0	Dopamine receptor agonist	DRD2|ADRA1A|ADRA2A|ADRA2B|ADRA2C|DRD1|DRD3|DRD4|DRD5|HTR1A|HTR1B|HTR1D|HTR2A|HTR2B|HTR2C|PRL|ADRA1B|ADRA1D|ADRB1|ADRB2|HTR7	-0.6668	2.1558	-1.7323
LJP009_HCC515_24H:E21	BRD-K44227013	ponatinib	HCC515	trt_cp	1.11 uM	24 h	3	170	0.4971	0.293952	1	1	1	1	0	Bcr-Abl inhibitor|FLT3 inhibitor|PDGFR inhibitor	ABL1|BCR|FLT3|RET|FGFR1|FGFR2|FGFR3|FGFR4|KIT|TEK|CYP2C8|CYP3A5|FGF2|FLT1|KDR|LCK|LYN|PDGFRA|SRC	-0.6666	2.1499	-1.7318
CPC006_NOMO1_6H:BRD-K35960502-001-10-1:10	BRD-K35960502	niclosamide	NOMO1	trt_cp	10 uM	6 h	2	323	0.05	0.128504	0	0	1	1	0	DNA inhibitor|STAT inhibitor	STAT3	-0.6666	2.1493	-1.7317
CPC015_ASC_24H:BRD-K28936863-051-18-1:10	BRD-K28936863	ketotifen	ASC	trt_cp	10 uM	24 h	4	168	0.22	0.1944	0	0	1	1	0	Histamine receptor agonist|Leukotriene receptor antagonist|Phosphodiesterase inhibitor	HRH1|PDE4A|PDE4B|PDE4C|PDE4D|PDE7A|PDE7B|PDE8A|PDE8B|PGD	-0.6665	2.1461	-1.7315
CPC016_NEU_24H:BRD-K67537649-001-01-1:10	BRD-K67537649	PQ-401	NEU	trt_cp	10 uM	24 h	3	230	0.38	0.298942	0	0	1	1	0	IGF-1 inhibitor	IGF1R	-0.6665	2.1455	-1.7314
REP.A026_YAPC_24H:L14	BRD-K92041145	O6-benzylguanine	YAPC	trt_cp	3.33 uM	24 h	2	64	0.0925	0.0778021	0	0	1	1	0	O6-alkylguanine-DNA alkyltransferase inhibitor	MGMT	-0.6662	2.1365	-1.7307
CPC009_HCC515_6H:BRD-K74501079-001-13-2:10	BRD-K74501079	azithromycin	HCC515	trt_cp	10 uM	6 h	3	178	0.1	0.134909	1	0	1	1	0	Bacterial 50S ribosomal subunit inhibitor	MLNR	-0.6662	2.1369	-1.7307
CPC018_ASC_24H:BRD-K32292990-001-01-0:10	BRD-K32292990	CGP-53353	ASC	trt_cp	10 uM	24 h	3	77	0.19	0.122307	1	0	1	1	0	EGFR inhibitor|PKC inhibitor	EGFR|PRKCB	-0.6661	2.1307	-1.7303
CPC005_A375_24H:BRD-K43405658-001-01-8:10	BRD-K43405658	BRD-K43405658	A375	trt_cp	10 uM	24 h	3	268	0.46	0.35504	1	1	1	1	0	Protein tyrosine kinase inhibitor	EGFR	-0.6659	2.1235	-1.7297
REP.A025_YAPC_24H:E11	BRD-K98733875	baicalin	YAPC	trt_cp	0.125 uM	24 h	3	139	0.1429	0.142513	1	0	1	1	0	Beta glucuronidase inhibitor	GUSB|PREP	-0.6654	2.1057	-1.7285
CPC016_A375_6H:BRD-K63516691-003-01-2:10	BRD-K63516691	T-0156	A375	trt_cp	10 uM	6 h	5	383	0.42	0.40556	1	0	1	1	0	Phosphodiesterase inhibitor	PDE5A	-0.6651	2.0968	-1.7279
CPC015_ASC_24H:BRD-K67017579-001-16-6:10	BRD-K67017579	cilostazol	ASC	trt_cp	10 uM	24 h	4	245	0.28	0.264846	0	0	1	1	0	Phosphodiesterase inhibitor	PDE3A|CYP2C19|CYP3A5|PDE3B	-0.6649	2.0851	-1.7272
CPC017_NPC_24H:BRD-K29950728-048-08-3:10	BRD-K29950728	clomifene	NPC	trt_cp	10 uM	24 h	4	177	0.22	0.199539	1	0	1	1	0	Estrogen receptor antagonist	ESR1|AR	-0.6646	2.0518	-1.7265
CPC011_A375_6H:BRD-K92870997-001-13-8:10	BRD-K92870997	pterostilbene	A375	trt_cp	10 uM	6 h	3	640	0.35	0.47858	0	0	1	1	0	Cyclooxygenase inhibitor|PPAR receptor agonist	PTGS2|FAAH|PPARA|PTGS1	-0.6646	2.0477	-1.7264
REP.B020_PC3_24H:N08	BRD-K47936004	piribedil	PC3	trt_cp	0.74 uM	24 h	2	61	0.0569	0.0595733	1	1	1	1	0	Dopamine receptor agonist	DRD2|DRD3|ADRA2A|ADRA1A|ADRA2C|DRD4|HTR1A|HTR2B	-0.6645	2.0376	-1.7262
REP.A001_A375_24H:L01	BRD-K28984613	dutasteride	A375	trt_cp	10 uM	24 h	3	259	0.3382	0.299273	1	1	1	1	0	5-alpha reductase inhibitor	SRD5A1|SRD5A2|CYP3A5	-0.6636	1.8935	-1.7239
CPC015_ASC_24H:BRD-A97701745-001-09-5:10	BRD-A97701745	pindolol	ASC	trt_cp	10 uM	24 h	4	193	0.16	0.177693	0	0	1	1	0	Adrenergic receptor antagonist	ADRB1|ADRB2|HTR1A|HTR1B|HTR2A|HTR2B	-0.6635	1.885	-1.7237
CPC018_ASC_24H:BRD-K59256312-066-04-1:10	BRD-K59256312	gabexate	ASC	trt_cp	10 uM	24 h	3	433	0.37	0.404739	0	0	1	1	0	Serine protease inhibitor	PRSS1|TPSAB1	-0.6635	1.8743	-1.7235
CPC006_NOMO1_6H:BRD-K59184148-001-04-2:10	BRD-K59184148	SB-216763	NOMO1	trt_cp	10 uM	6 h	2	438	0.09	0.200765	0	0	1	1	0	GSK inhibitor	GSK3B|CCNA2|CDK2|GSK3A	-0.6634	1.8619	-1.7233
CPC018_HT29_6H:BRD-K69195780-001-01-5:10	BRD-K69195780	NAN-190	HT29	trt_cp	10 uM	6 h	5	250	0.3	0.276924	1	0	1	1	0	Serotonin receptor agonist	HTR1A|ADRA1A|ADRA1B|ADRA1D|HTR1F	-0.6633	1.8478	-1.723
LJP001_SKBR3_24H:E03	BRD-K50140147	NVP-TAE684	SKBR3	trt_cp	10 uM	24 h	4	314	0.5178	0.407734	1	1	1	1	0	ALK inhibitor	ALK|INSR	-0.6633	1.8492	-1.723
EMU001_MINO_24H:M14	BRD-K30577245	docetaxel	MINO	trt_cp	2.5 uM	24 h	3	640	0.7874	0.717824	1	1	1	1	0	Tubulin inhibitor	TUBB|BCL2|MAP2|MAP4|MAPT|NR1I2|TUBB1	-0.6632	1.8366	-1.7228
CPC017_PHH_24H:BRD-K02265150-001-15-8:10	BRD-K02265150	amoxapine	PHH	trt_cp	10 uM	24 h	3	166	0.27	0.214075	0	0	1	1	0	Norepinephrine inhibitor	SLC6A2|SLC6A4|HTR2A|DRD1|DRD2|DRD3|DRD4|HTR6|ADRA1A|ADRA1B|ADRA1D|ADRA2A|ADRA2B|ADRA2C|CHRM1|CHRM2|CHRM3|CHRM4|CHRM5|DRD5|GABRA1|GABRA2|GABRA3|GABRA4|GABRA5|GABRA6|GABRB1|GABRB2|GABRB3|GABRD|GABRE|GABRG1|GABRG2|GABRG3|GABRP|GABRQ|HRH1|HRH4|HTR1A|HTR1B|HTR2B|HTR2C|HTR3A|HTR7|SLC6A3	-0.6631	1.8329	-1.7227
PBIOA018_HEPG2_24H:I07	BRD-K60866521	idelalisib	HEPG2	trt_cp	10 uM	24 h	3	82	0.23	0.138868	1	1	1	1	0	PI3K inhibitor	PIK3CD|PIK3CG|CCL3|CCL4|PIK3CA|PIK3CB	-0.6631	1.8344	-1.7227
CPC011_A375_6H:BRD-K04710043-001-14-5:10	BRD-K04710043	hexamethylenebisacetamide	A375	trt_cp	10 uM	6 h	3	680	0.43	0.546788	0	0	1	1	0	AKT inhibitor|Differentiation inducer|NFKB inhibitor	AKT1	-0.663	1.8249	-1.7225
PBIOA016_A375_24H:A07	BRD-K79759585	sildenafil	A375	trt_cp	10 uM	24 h	2	226	0.413	0.30893	1	1	1	1	0	Phosphodiesterase inhibitor	PDE5A|PDE6G|PDE6H|SLCO1B1|SLCO1B3	-0.6628	1.8079	-1.7218
PBIOA017_A375_24H:H20	BRD-K76617868	fasudil	A375	trt_cp	3.33 uM	24 h	2	121	0.1	0.11123	0	0	1	1	0	Rho associated kinase inhibitor	ROCK1|ROCK2|PKIA|PRKACA	-0.6627	1.8037	-1.7215
REP.A012_HT29_24H:B10	BRD-A00147595	balaglitazone	HT29	trt_cp	0.37 uM	24 h	2	77	0.2127	0.129408	0	0	1	1	0	Insulin sensitizer|PPAR receptor agonist	PPARG|INS	-0.6627	1.8034	-1.7214
MOAR006_PC3_24H:F01	BRD-K15567136	papaverine	PC3	trt_cp	10 uM	24 h	3	303	0.49	0.389628	1	1	1	1	0	Phosphodiesterase inhibitor	PDE10A|PDE4B|PDE5A	-0.6626	1.7998	-1.7212
CPC018_HT29_6H:BRD-K01648091-001-01-8:10	BRD-K01648091	LE-300	HT29	trt_cp	10 uM	6 h	5	296	0.26	0.28052	0	0	1	1	0	Dopamine receptor antagonist	DRD5	-0.6625	1.7994	-1.7211
CPC010_HEPG2_6H:BRD-K41713976-003-04-2:10	BRD-K41713976	E-4031	HEPG2	trt_cp	10 uM	6 h	3	247	0.33	0.288693	1	0	1	1	0	Potassium channel antagonist	KCNH2|KCNH1	-0.6623	1.7929	-1.7206
REP.B012_HELA_24H:M23	BRD-K03194791	roflumilast	HELA	trt_cp	0.03 uM	24 h	2	213	0.4648	0.318166	0	0	1	1	0	Phosphodiesterase inhibitor	PDE4A|PDE4B|PDE4C|PDE4D|CYP2B6|CYP2C19	-0.6623	1.7919	-1.7205
CPC006_NOMO1_6H:BRD-A34255068-001-16-2:10	BRD-A34255068	rolipram	NOMO1	trt_cp	10 uM	6 h	2	236	0.04	0.0982464	0	0	1	1	0	Phosphodiesterase inhibitor	PDE4A|PDE4B|PDE4D|PDE4C	-0.6622	1.7902	-1.7203
CPC017_SKB_24H:BRD-K43389675-001-01-3:10	BRD-K43389675	daunorubicin	SKB	trt_cp	10 uM	24 h	2	471	0.6	0.537547	0	0	1	1	0	RNA synthesis inhibitor|Topoisomerase inhibitor	TOP2A|TOP2B	-0.6621	1.7877	-1.7201
LJP001_MDAMB231_6H:BRD-K69932463-001-05-6:2	BRD-K69932463	AZD-8055	MDAMB231	trt_cp	2.22 uM	6 h	4	321	0.47	0.392764	1	1	1	1	0	MTOR inhibitor	MTOR	-0.6621	1.7873	-1.72
PBIOA013_HCC515_24H:O07	BRD-K37798499	etoposide	HCC515	trt_cp	10 uM	24 h	3	478	0.74	0.601396	1	1	1	1	0	Topoisomerase inhibitor	TOP2A|TOP2B|CYP2E1|CYP3A5	-0.662	1.7839	-1.7197
REP.B005_YAPC_24H:O09	BRD-K11196887	norfloxacin	YAPC	trt_cp	0.25 uM	24 h	2	75	0.1008	0.0879208	1	1	1	1	0	Bacterial DNA Gyrase inhibitor	TOP2A	-0.6618	1.781	-1.7193
AICHI002_OCILY3_24H:H13	BRD-K68065987	MK-2206	OCILY3	trt_cp	10 uM	24 h	3	115	0.213	0.158259	0	0	1	1	0	AKT inhibitor	AKT1|AKT2|AKT3	-0.6617	1.7792	-1.719
CPC006_NOMO1_6H:BRD-K78513633-001-07-4:177.6	BRD-K78513633	lonidamine	NOMO1	trt_cp	200 uM	6 h	2	245	0.16	0.200204	0	0	1	1	0	Glucokinase inhibitor	GCK	-0.6616	1.7771	-1.7187
EMU001_MINO_24H:M01	BRD-K19295594	gossypol	MINO	trt_cp	10 uM	24 h	2	476	0.7464	0.602726	0	0	1	1	0	BCL inhibitor|MCL1 inhibitor	BCL2|BCL2L1|MCL1|BCL2L2|CTGF|EGF	-0.6616	1.7766	-1.7186
REP.A028_THP1_24H:D20	BRD-A93093700	temazepam	THP1	trt_cp	3.33 uM	24 h	2	123	0.1173	0.12146	0	0	1	1	0	GABA receptor agonist	GABRA1|GABRA2|GABRA3|GABRA5|GABRA4|GABRA6|GABRB1|GABRB2|GABRB3|GABRD|GABRE|GABRG1|GABRG2|GABRG3|GABRP|GABRQ|GABRR1|GABRR2|GABRR3|TSPO	-0.6614	1.7732	-1.7181
CPC015_NPC_24H:BRD-A51820102-008-16-4:10	BRD-A51820102	econazole	NPC	trt_cp	10 uM	24 h	4	362	0.57	0.459327	0	0	1	1	0	Lanosterol demethylase inhibitor|Bacterial cell wall synthesis inhibitor|Sterol demethylase inhibitor	CYP51A1|NPY1R|NPY2R|TRPM2|TRPV5	-0.6613	1.772	-1.7179
EMU001_THP1_24H:M01	BRD-K19295594	gossypol	THP1	trt_cp	10 uM	24 h	3	801	0.8583	0.838429	1	1	1	1	0	BCL inhibitor|MCL1 inhibitor	BCL2|BCL2L1|MCL1|BCL2L2|CTGF|EGF	-0.6612	1.7713	-1.7177
LJP008_HA1E_24H:P07	BRD-K26756394	VE-821	HA1E	trt_cp	10 uM	24 h	2	101	0.2498	0.160616	1	1	1	1	0	ATR kinase inhibitor	ATR	-0.6612	1.7702	-1.7176
CPC017_ASC_24H:BRD-A51829654-003-02-8:10	BRD-A51829654	BRL-15572	ASC	trt_cp	10 uM	24 h	4	439	0.13	0.241565	0	0	1	1	0	Serotonin receptor antagonist	HTR1D|HTR1A|HTR1B|HTR1E|HTR1F|HTR2A|HTR2B|HTR2C|HTR6	-0.661	1.7685	-1.7172
REP.B019_MCF10A_24H:P18	BRD-K50590187	capsaicin	MCF10A	trt_cp	0.01 uM	24 h	2	95	0.2446	0.154142	1	1	1	1	0	TRPV agonist	TRPV1|ENOX2|CFTR	-0.6609	1.7676	-1.717
CPC017_NPC_24H:BRD-K67298865-001-03-3:10	BRD-K67298865	SB-431542	NPC	trt_cp	10 uM	24 h	4	472	0.09	0.208412	0	0	1	1	0	TGF-beta receptor inhibitor	TGFBR1|ACVR1C|ACVR1B	-0.661	1.7677	-1.717
CPC017_ASC_24H:BRD-K29555132-001-02-2:10	BRD-K29555132	arachidonamide	ASC	trt_cp	10 uM	24 h	4	324	0.42	0.373016	1	0	1	1	0	Cannabinoid receptor agonist	CNR1|CNR2	-0.6609	1.7669	-1.7168
CPC018_HT29_6H:BRD-K70241288-001-01-1:10	BRD-K70241288	L-692585	HT29	trt_cp	10 uM	6 h	5	188	0.12	0.15188	1	0	1	1	0	Growth hormone releasing peptide ligand agonist	GHSR	-0.6605	1.7636	-1.7159
MOAR006_A375_24H:E07	BRD-K33245965	BMS-833923	A375	trt_cp	10 uM	24 h	3	530	0.73	0.62897	1	1	1	1	0	Smoothened receptor antagonist	DHH|IHH|SMO	-0.6605	1.7636	-1.7159
REP.A020_A375_24H:P07	BRD-K49404994	levetiracetam	A375	trt_cp	10 uM	24 h	3	145	0.1746	0.160893	0	0	1	1	0	Calcium channel blocker	SV2A|CACNA1B|SCN1A	-0.6604	1.7627	-1.7157
REP.A024_MCF7_24H:E01	BRD-K74763371	bosentan	MCF7	trt_cp	10 uM	24 h	3	210	0.4796	0.320907	1	1	1	1	0	Endothelin receptor antagonist	EDNRB|EDNRA|ABCB1|CYP2C19|CYP3A4	-0.6599	1.76	-1.7144
AICHI001_TMD8_4H:D07	BRD-K63923597	barasertib-HQPA	TMD8	trt_cp	10 uM	4 h	3	104	0.31	0.181563	1	1	1	1	0	Aurora kinase inhibitor	AURKB|AURKC|AURKA	-0.6599	1.7599	-1.7143
CPC017_NPC_24H:BRD-K64044582-001-02-8:10	BRD-K64044582	linoleamide	NPC	trt_cp	10 uM	24 h	4	229	0.14	0.181056	0	0	1	1	0	ACAT inhibitor	SOAT1|SOAT2	-0.6598	1.7594	-1.714
CPC006_NCIH2073_6H:BRD-K70642949-001-01-1:0.1	BRD-K70642949	GSK-2334470	NCIH2073	trt_cp	0.12 uM	6 h	2	71	0.13	0.0971475	0	0	1	1	0	PDK inhibitor	PDPK1|AURKA|AURKB|PDK1	-0.6597	1.7593	-1.7138
REP.B013_HT29_24H:C14	BRD-A37959677	estrone	HT29	trt_cp	0.74 uM	24 h	2	69	0.1902	0.11584	0	0	1	1	0	Estrogen receptor agonist|Estrogenic hormone	ESR1|ESR2	-0.6596	1.7585	-1.7136
REP.A016_HT29_24H:C01	BRD-K51544265	cabozantinib	HT29	trt_cp	10 uM	24 h	3	583	0.7726	0.678644	1	1	1	1	0	RET inhibitor|VEGFR inhibitor	KDR|MET|FLT3|KIT|RET|TEK|CYP2C19	-0.6596	1.7583	-1.7135
CPC006_NOMO1_6H:BRD-K32164935-001-17-5:10	BRD-K32164935	tolazamide	NOMO1	trt_cp	10 uM	6 h	2	540	0.18	0.315256	0	0	1	1	0	ATP channel blocker	ABCC8|KCNJ1|KCNJ10|KCNJ11	-0.6592	1.7555	-1.7123
CPC006_AGS_6H:BRD-A36318220-001-04-7:160	BRD-A36318220	necrostatin-1	AGS	trt_cp	150 uM	6 h	2	249	0.08	0.142717	1	0	1	1	0	RIPK inhibitor	IDO1|KRR1|RIPK1	-0.6591	1.7551	-1.7121
PAC001_U2OS_6H:BRD-K71266197-236-01-9:10	BRD-K71266197	PSB-06126	U2OS	trt_cp	10 uM	6 h	2	75	0.07	0.0732673	0	0	1	1	0	NTPDase inhibitor	ENTPD3	-0.6588	1.753	-1.7114
CPC014_A549_24H:BRD-K88551539-001-01-0:10	BRD-K88551539	CAY-10585	A549	trt_cp	10 uM	24 h	3	472	0.61	0.542583	0	0	1	1	0	HIF modulator	HIF1A	-0.6587	1.7525	-1.7112
CPC017_ASC_24H:BRD-K94176593-001-02-9:10	BRD-K94176593	TWS-119	ASC	trt_cp	10 uM	24 h	4	374	0.58	0.470956	1	1	1	1	0	GSK inhibitor	GSK3B|JUN|MYC	-0.6586	1.7522	-1.711
REP.A005_HA1E_24H:L11	BRD-K10670311	sulfasalazine	HA1E	trt_cp	0.125 uM	24 h	3	69	0.1461	0.101527	1	0	1	1	0	Antirheumatic drug|NFKB inhibitor	PTGS1|PTGS2|ALOX5|ACAT1|CHUK|IKBKB|PLA2G1B|PPARG|SLC46A1|SLC7A11|TBXAS1	-0.6585	1.7515	-1.7108
LIVB002_HUH7_72H:O11	BRD-K49668410	BRD-K49668410	HUH7	trt_cp	4 uM	72 h	3	126	0.11	0.119045	0	0	1	1	0	Bacterial 50S ribosomal subunit inhibitor	CYP3A4|CYP2C19|CYP3A5|CYP3A7	-0.6585	1.7515	-1.7108
CPC006_NCIH508_6H:BRD-A17883755-001-02-0:177.6	BRD-A17883755	lenalidomide	NCIH508	trt_cp	200 uM	6 h	2	58	0.07	0.0644308	0	0	1	1	0	Carcinogen	CRBN|TNF|CDH5|PTGS2|TNFSF11	-0.6585	1.7511	-1.7106
REP.A001_PC3_24H:N19	BRD-K29735307	ostarine	PC3	trt_cp	10 uM	24 h	3	157	0.3383	0.23304	1	1	1	1	0	Androgen receptor antagonist	AR	-0.6584	1.751	-1.7105
REP.B011_YAPC_24H:I01	BRD-K06294530	UK-383367	YAPC	trt_cp	2.22 uM	24 h	2	138	0.3397	0.218936	0	0	1	1	0	Procollagen C-Endopeptidase Inhibitors	BMP1	-0.6582	1.7497	-1.71
REP.A006_YAPC_24H:N01	BRD-K22936972	diphenylpyraline	YAPC	trt_cp	10 uM	24 h	3	264	0.4159	0.335063	1	0	1	1	0	Dopamine receptor antagonist	HRH1|SLC6A3	-0.6581	1.749	-1.7097
CPC015_SKB_24H:BRD-A06352418-001-15-0:10	BRD-A06352418	terfenadine	SKB	trt_cp	10 uM	24 h	2	102	0.07	0.0854436	0	0	1	1	0	Histamine receptor antagonist	HRH1|KCNH2|CHRM1|CHRM2|CHRM3|CHRM4|CHRM5|KCNH1	-0.658	1.7481	-1.7092
AICHI002_KMS34_24H:A07	BRD-K14618467	IKK-16	KMS34	trt_cp	10 uM	24 h	3	678	0.82	0.753967	0	0	1	1	0	IKK inhibitor	IKBKB	-0.6579	1.7476	-1.709
CPC005_PC3_6H:BRD-A65767837-001-03-6:10	BRD-A65767837	hydrocortisone-acetate	PC3	trt_cp	10 uM	6 h	3	466	0.2	0.308701	1	0	1	1	0	Corticosteroid agonist|Glucocorticoid receptor agonist	NR3C1|NR3C2	-0.6577	1.7468	-1.7087
CPC017_MCF7_24H:BRD-K02590140-001-01-2:10	BRD-K02590140	O-2050	MCF7	trt_cp	10 uM	24 h	5	151	0.27	0.204174	1	0	1	1	0	Cannabinoid receptor antagonist	CNR1	-0.6574	1.7451	-1.7078
REP.B003_PC3_24H:N02	BRD-K35520305	dacarbazine	PC3	trt_cp	0.74 uM	24 h	3	384	0.5656	0.471249	1	1	1	1	0	DNA alkylating agent	PGD|POLA2	-0.6574	1.7451	-1.7077
REP.A010_HELA_24H:N24	BRD-K01638814	rilmenidine	HELA	trt_cp	0.04 uM	24 h	3	255	0.4588	0.34587	0	0	1	1	0	Adrenergic receptor agonist|Imidazoline receptor agonist	NISCH|ADRA2A	-0.6574	1.7451	-1.7077
REP.B007_PC3_24H:F17	BRD-K40718343	AEE-788	PC3	trt_cp	0.03 uM	24 h	2	826	0.5113	0.657141	0	0	1	1	0	EGFR inhibitor|VEGFR inhibitor	EGFR|ERBB2|KDR|ERBB4|FLT1|FGFR2|FGFR3	-0.6573	1.745	-1.7076
CPC014_VCAP_24H:BRD-K78431006-001-02-9:10	BRD-K78431006	crizotinib	VCAP	trt_cp	10 uM	24 h	5	341	0.47	0.404815	0	0	1	1	0	ALK inhibitor	ALK|MET|CYP2B6|CYP3A5|MST1R|ROS1	-0.6569	1.7436	-1.7064
CPC016_A375_6H:BRD-K87049188-001-03-6:10	BRD-K87049188	fusaric-acid	A375	trt_cp	10 uM	6 h	5	328	0.13	0.208804	0	0	1	1	0	Dopamine receptor antagonist	DBH	-0.6568	1.7432	-1.7061
CPC015_SKB_24H:BRD-K15409150-001-01-7:10	BRD-K15409150	penfluridol	SKB	trt_cp	10 uM	24 h	2	147	0.15	0.150153	0	0	1	1	0	Calcium channel blocker	DRD1|DRD2|CACNA1G	-0.6566	1.743	-1.7058
CPC016_SKB_24H:BRD-A64227845-004-02-8:10	BRD-A64227845	SKF-77434	SKB	trt_cp	10 uM	24 h	3	469	0.3	0.379295	0	0	1	1	0	Dopamine receptor agonist	DRD1	-0.6565	1.7426	-1.7055
LJP008_CD34_24H:A19	BRD-K54256913	MK-1775	CD34	trt_cp	10 uM	24 h	3	260	0.448	0.345109	0	0	1	1	0	WEE1 kinase inhibitor	WEE1	-0.6565	1.7422	-1.7053
CPC014_MCF7_6H:D24	BRD-K48722833	iloperidone	MCF7	trt_cp	10 uM	6 h	5	268	0.1371	0.193828	1	0	1	1	0	Dopamine receptor antagonist|Serotonin receptor antagonist	DRD2|HTR2A|HTR1A|HTR6|HTR7|ADRA1A|ADRA2C|DRD1|DRD3|DRD4|HRH1	-0.6563	1.7417	-1.705
CPC015_ASC_24H:BRD-A15415227-003-01-1:10	BRD-A15415227	GW-1929	ASC	trt_cp	10 uM	24 h	4	521	0.13	0.263161	0	0	1	1	0	PPAR receptor agonist|Insulin sensitizer	PPARG|INS	-0.6563	1.7415	-1.7048
CPC006_NOMO1_6H:BRD-K02407574-001-04-8:0.31	BRD-K02407574	parbendazole	NOMO1	trt_cp	0.3 uM	6 h	2	417	0.04	0.130596	0	0	1	1	0	Tubulin inhibitor	TUBB	-0.6562	1.7415	-1.7046
CPC014_A375_6H:F04	BRD-K73293050	WZ-3146	A375	trt_cp	10 uM	6 h	2	333	0.1902	0.254483	1	1	1	1	0	EGFR inhibitor	EGFR	-0.6561	1.7413	-1.7043
CPC005_HA1E_24H:BRD-A78303415-001-03-5:10	BRD-A78303415	hyoscyamine	HA1E	trt_cp	10 uM	24 h	3	169	0.16	0.166278	1	0	1	1	0	Acetylcholine receptor antagonist	CHRM1|CHRM2|CHRM3|CHRM4	-0.6559	1.7412	-1.704
AML001_CD34_24H:BRD-K43389675:0.37037	BRD-K43389675	daunorubicin	CD34	trt_cp	0.37 uM	24 h	2	580	0.76	0.671354	0	0	1	1	0	RNA synthesis inhibitor|Topoisomerase inhibitor	TOP2A|TOP2B	-0.6559	1.7412	-1.7039
MOAR003_PC3_24H:D06	BRD-K81548480	AC-264613	PC3	trt_cp	1.11 uM	24 h	2	85	0.1308	0.106621	1	1	1	1	0	PAR agonist	F2RL1	-0.6559	1.7412	-1.7038
LPROT004_YAPC_6H:BRD-K27305650:10	BRD-K27305650	LY-294002	YAPC	trt_cp	10 uM	6 h	3	315	0.7	0.474826	1	1	1	1	0	MTOR inhibitor|DNA dependent protein kinase inhibitor|Phosphodiesterase inhibitor|PLK inhibitor	MTOR|PIK3CD|PIK3CG|PIK3CA|PLK1|PRKDC|PIK3CB|PDE2A|AKT1|CHEK1|GSK3B|LCK|MAPK1|MAPK11|MAPK12|MAPK14|MAPK8|PRKCA|ROCK1|RPS6KB1|SGK1	-0.6557	1.7409	-1.7033
CPC004_MCF7_6H:BRD-K36055864-001-09-3:10	BRD-K36055864	cycloheximide	MCF7	trt_cp	10 uM	6 h	4	455	0.59	0.523917	1	1	1	1	0	Protein synthesis inhibitor	GSK3B|RPL3	-0.6557	1.741	-1.7033
CPD003_MCF7_6H:BRD-A18696154-003-17-6:10	BRD-A18696154	idazoxan	MCF7	trt_cp	10 uM	6 h	2	134	0.17	0.152619	0	0	1	1	0	Adrenergic receptor antagonist	NISCH|ADRA2A	-0.6556	1.7408	-1.7032
CPC016_NPC_24H:BRD-A22684332-003-03-1:10	BRD-A22684332	procaterol	NPC	trt_cp	10 uM	24 h	4	213	0.09	0.140004	0	0	1	1	0	Adrenergic receptor agonist	ADRB2	-0.6554	1.7396	-1.7025
CPC006_NOMO1_6H:BRD-K17349619-003-01-4:10	BRD-K17349619	HLI-373	NOMO1	trt_cp	10 uM	6 h	2	491	0.8	0.633748	0	0	1	1	0	MDM inhibitor	MDM2	-0.6553	1.7395	-1.7024
CPC005_A375_24H:BRD-K53263234-001-02-9:10	BRD-K53263234	CITCO	A375	trt_cp	10 uM	24 h	3	167	0.22	0.193821	1	0	1	1	0	CAR agonist	NR1I3	-0.6552	1.7393	-1.7022
REP.B023_HUVEC.A_24H:K04	BRD-K70924353	amtolmetin-guacil	HUVEC	trt_cp	0.08 uM	24 h	2	398	0.0515	0.144769	0	0	1	1	0	Cyclooxygenase inhibitor	PTGS1|PTGS2	-0.655	1.7384	-1.7016
LJP007_HELA_24H:D13	BRD-K73368362	BIX-02189	HELA	trt_cp	10 uM	24 h	3	143	0.3143	0.214373	1	1	1	1	0	MEK inhibitor	MAP2K5|MAPK7	-0.655	1.7383	-1.7015
REP.A022_MCF7_24H:C02	BRD-K68103045	CGS-20625	MCF7	trt_cp	3.33 uM	24 h	3	295	0.3837	0.340202	1	1	1	1	0	Benzodiazepine receptor agonist	GABRA1|GABRA2|GABRA3|GABRA5|GABRA4|GABRA6	-0.6549	1.7378	-1.7013
LJP008_SHSY5Y_24H:G01	BRD-K13094524	PFI-1	SHSY5Y	trt_cp	10 uM	24 h	2	408	0.6347	0.514571	0	0	1	1	0	Bromodomain inhibitor	BRD4	-0.6548	1.7374	-1.7011
CPC018_NPC_24H:BRD-K17497770-001-01-0:10	BRD-K17497770	butein	NPC	trt_cp	10 uM	24 h	3	485	0.61	0.550005	0	0	1	1	0	EGFR inhibitor|Src inhibitor	ACE|CXCL8|IL6|SIRT1|SRD5A1|SRD5A2|TNF	-0.6548	1.7373	-1.7009
CPC014_HCC515_6H:BRD-K29582115-311-02-0:10	BRD-K29582115	ziprasidone	HCC515	trt_cp	10 uM	6 h	3	449	0.49	0.474299	0	0	1	1	0	Dopamine receptor antagonist|Serotonin receptor antagonist	DRD2|HTR2A|HTR1A|HTR1D|HRH1|HTR1B|HTR1E|HTR2C|HTR7|ADRA1A|ADRA1B|ADRA2A|ADRA2B|ADRA2C|CHRM1|CHRM2|CHRM3|CHRM4|CHRM5|DRD1|DRD3|DRD4|DRD5|HTR3A|HTR6|SLC6A4	-0.6545	1.7366	-1.7002
CPC017_NPC_24H:BRD-A94756469-001-03-9:10	BRD-A94756469	digoxin	NPC	trt_cp	10 uM	24 h	4	714	0.72	0.725013	0	0	1	1	0	Na/K-ATPase inhibitor	ATP1A1|ABCB1|RORC|SLCO1B3	-0.6545	1.7366	-1.7002
REP.A016_MDAMB231_24H:I01	BRD-K53814070	ripasudil	MDAMB231	trt_cp	10 uM	24 h	3	240	0.4516	0.3329	1	1	1	1	0	Rho associated kinase inhibitor	ROCK1|ROCK2	-0.6543	1.7361	-1.6997
CPC005_HCC515_6H:BRD-K08556791-001-02-7:10	BRD-K08556791	ethoprop	HCC515	trt_cp	10 uM	6 h	2	74	0.05	0.061508	1	0	1	1	0	Acetylcholinesterase inhibitor	ACHE	-0.6542	1.7358	-1.6995
REP.B010_HT29_24H:N01	BRD-A14941520	dofequidar	HT29	trt_cp	2.22 uM	24 h	2	171	0.3248	0.238307	1	1	1	1	0	MRP inhibitor|P-glycoprotein inhibitor	ABCB1|ABCC1	-0.6541	1.7356	-1.6991
CPC011_A375_6H:BRD-K51671335-001-06-4:10	BRD-K51671335	levosulpiride	A375	trt_cp	10 uM	6 h	3	605	0.35	0.46531	0	0	1	1	0	Dopamine receptor antagonist	DRD2|DRD3|CA1|CA12|CA7	-0.654	1.7353	-1.699
CPC016_ASC_24H:BRD-K12513978-001-16-7:10	BRD-K12513978	fenbufen	ASC	trt_cp	10 uM	24 h	3	194	0.27	0.231427	1	0	1	1	0	Cyclooxygenase inhibitor	PTGS1|PTGS2	-0.654	1.7352	-1.6989
CPC006_NCIH2073_6H:BRD-K96354014-001-09-6:10	BRD-K96354014	nifedipine	NCIH2073	trt_cp	10 uM	6 h	2	70	0.11	0.0887311	0	0	1	1	0	Calcium channel blocker	CACNA1C|CACNA1D|CACNA1S|CACNA1F|CACNA2D1|CYP3A5|CACNA1H|CACNB2|CALM1|GLRA1|GLRA3|GLRB|KCNA1|KCNA5|NR1I2|TRPM3	-0.6537	1.734	-1.6983
REP.A028_HEK293_24H:H02	BRD-K93944989	safingol	HEK293	trt_cp	0.3 uM	24 h	2	98	0.2148	0.14671	0	0	1	1	0	PKC inhibitor	PRKCA|TRPM3	-0.6537	1.7337	-1.6981
CPC011_A375_6H:BRD-K25394294-001-11-5:10	BRD-K25394294	oxaprozin	A375	trt_cp	10 uM	6 h	3	653	0.38	0.503708	0	0	1	1	0	Cyclooxygenase inhibitor	PTGS1|PTGS2	-0.6536	1.7337	-1.6979
CPC002_HA1E_6H:BRD-K05528470-305-01-4:10	BRD-K05528470	L-745870	HA1E	trt_cp	10 uM	6 h	3	61	0.11	0.0828308	1	0	1	1	0	Dopamine receptor antagonist	DRD4|DRD1|DRD2|DRD3|HTR1A|HTR2A|HTR6|HTR7	-0.6536	1.7337	-1.6978
CPD001_MCF7_24H:BRD-K73251053-003-16-4:10	BRD-K73251053	clorgiline	MCF7	trt_cp	10 uM	24 h	3	263	0.34	0.302376	1	0	1	1	0	Monoamine oxidase inhibitor	MAOA	-0.6534	1.7326	-1.6973
PAC001_U2OS_6H:BRD-K69195780-001-01-5:10	BRD-K69195780	NAN-190	U2OS	trt_cp	10 uM	6 h	2	125	0.48	0.247689	0	0	1	1	0	Serotonin receptor agonist	HTR1A|ADRA1A|ADRA1B|ADRA1D|HTR1F	-0.6533	1.7324	-1.6971
CPC012_PHH_24H:BRD-K07403598-001-01-0:10	BRD-K07403598	CAY-10470	PHH	trt_cp	10 uM	24 h	3	459	0.5	0.48442	0	0	1	1	0	NFKB inhibitor	NFKB1|TNF	-0.6532	1.7319	-1.697
REP.B022_A375_24H:N01	BRD-A69815203	cyclosporin-a	A375	trt_cp	2.22 uM	24 h	2	164	0.3639	0.247026	1	1	1	1	0	Calcineurin inhibitor	PPIA|PPP3CA	-0.6533	1.732	-1.697
CPC006_SW480_6H:BRD-K73397362-001-03-3:44.4	BRD-K73397362	purmorphamine	SW480	trt_cp	40 uM	6 h	2	158	0.29	0.21645	0	0	1	1	0	Smoothened receptor agonist	SMO|DHH|IHH|PTCH1	-0.6532	1.7315	-1.6968
ISO002_MCF10A.TP53.M_24H:G19	BRD-K09619322	CD-1530	MCF10A	trt_cp	10 uM	24 h	2	63	0.1447	0.0965462	1	1	1	1	0	Retinoid receptor agonist	RARG	-0.6531	1.7311	-1.6966
CPC018_A549_24H:BRD-A35033682-001-02-8:10	BRD-A35033682	eriodictyol	A549	trt_cp	10 uM	24 h	2	79	0.29	0.153053	0	0	1	1	0	Cytochrome P450 inhibitor	NFE2L2	-0.6531	1.7308	-1.6965
CPD002_MCF7_24H:BRD-K71289571-001-07-2:10	BRD-K71289571	zafirlukast	MCF7	trt_cp	10 uM	24 h	3	129	0.34	0.21177	1	1	1	1	0	Leukotriene receptor antagonist	CYSLTR1|CYSLTR2	-0.653	1.7307	-1.6964
CPC011_A375_6H:BRD-K44779798-001-05-7:10	BRD-K44779798	miglitol	A375	trt_cp	10 uM	6 h	3	573	0.42	0.496058	0	0	1	1	0	Glucosidase inhibitor	GAA|MGAM|SLC5A4|GANAB|GANC	-0.6529	1.7301	-1.6962
REP.A016_HT29_24H:H01	BRD-A53176877	methylprednisolone	HT29	trt_cp	10 uM	24 h	3	167	0.3219	0.234449	1	1	1	1	0	Glucocorticoid receptor agonist	NR3C1	-0.6528	1.7297	-1.696
ASG003_MCF7_24H:M20	BRD-K66175015	afatinib	MCF7	trt_cp	1.11 uM	24 h	4	152	0.3699	0.23977	1	1	1	1	0	EGFR inhibitor	EGFR|ERBB2|ERBB4	-0.6529	1.7297	-1.696
REP.A015_YAPC_24H:J24	BRD-K59037100	oxybenzone	YAPC	trt_cp	0.04 uM	24 h	3	689	0.2353	0.407147	0	0	1	1	0	Lipase inhibitor	LIPE	-0.6528	1.7297	-1.6959
REP.A017_A549_24H:O19	BRD-A61767428	ursolic-acid	A549	trt_cp	10 uM	24 h	3	183	0.2705	0.224978	0	0	1	1	0	11-beta-HSD1 inhibitor|Acetylcholinesterase inhibitor|Caspase inhibitor|HIV protease inhibitor|Lipid peroxidase inhibitor|Quorum sensing signaling modulator|Steryl sulfatase inhibitor|Tyrosine phosphatase inhibitor|ATPase inhibitor|NFKB inhibitor|STAT inhibitor	HSD11B1|PTPN1|ACHE|CASP3|STS|PLA2G1B|PYGM	-0.6527	1.7295	-1.6957
CPC002_HCC515_24H:BRD-K54094468-003-05-3:10	BRD-K54094468	remoxipride	HCC515	trt_cp	10 uM	24 h	2	280	0.41	0.342611	1	1	1	1	0	Dopamine receptor antagonist	DRD2|DRD3|DRD4|HTR2A|SIGMAR1	-0.6527	1.7292	-1.6956
CPC006_NCIH2073_6H:BRD-K23363278-001-01-3:1	BRD-K23363278	CYT-997	NCIH2073	trt_cp	1.11 uM	6 h	2	147	0.23	0.185932	0	0	1	1	0	Tubulin inhibitor	TUBB	-0.6526	1.7288	-1.6954
CPC011_A375_6H:BRD-K13800121-236-02-5:10	BRD-K13800121	parecoxib	A375	trt_cp	10 uM	6 h	3	572	0.23	0.366769	1	0	1	1	0	Cyclooxygenase inhibitor	PTGS2|LTF	-0.6526	1.7288	-1.6954
REP.B019_HT29_24H:C02	BRD-K45158365	valsartan	HT29	trt_cp	0.74 uM	24 h	2	364	0.5519	0.453222	1	1	1	1	0	Angiotensin receptor antagonist	AGTR1	-0.6524	1.7267	-1.6947
AICHI001_SKMEL5_24H:E24	BRD-K53581288	baricitinib	SKMEL5	trt_cp	0.01 uM	24 h	3	77	0.17	0.115691	1	0	1	1	0	JAK inhibitor	JAK1|JAK2	-0.6522	1.7258	-1.6942
REP.A028_THP1_24H:K03	BRD-K95901403	XL-147	THP1	trt_cp	1.11 uM	24 h	2	118	0.0731	0.093914	0	0	1	1	0	PI3K inhibitor	PIK3CG|PIK3CA|PIK3CD	-0.6521	1.7255	-1.6941
CPC004_HCC515_24H:BRD-A29082194-001-02-4:10	BRD-A29082194	gitoxigenin	HCC515	trt_cp	10 uM	24 h	3	415	0.65	0.525184	1	1	1	1	0	Na/K-ATPase inhibitor	ATP1A1	-0.6521	1.7255	-1.6939
CPC017_A375_6H:BRD-K14282469-001-01-5:10	BRD-K14282469	LY-165163	A375	trt_cp	10 uM	6 h	3	206	0.21	0.210317	0	0	1	1	0	Serotonin receptor antagonist	HTR1A|HTR1D	-0.652	1.7251	-1.6938
CPC015_HT29_6H:BRD-K73589491-001-05-4:10	BRD-K73589491	nizatidine	HT29	trt_cp	10 uM	6 h	3	198	0.35	0.266193	1	0	1	1	0	Histamine receptor antagonist	HRH2	-0.6519	1.7245	-1.6934
REP.B024_HELA_24H:P13	BRD-K79602928	metformin	HELA	trt_cp	2.22 uM	24 h	2	132	0.3271	0.210115	1	1	1	1	0	Insulin sensitizer	INS|ACACB|PRKAB1	-0.6518	1.7238	-1.6932
REP.A024_PC3_24H:I19	BRD-K76953762	indoramin	PC3	trt_cp	10 uM	24 h	3	96	0.1546	0.123189	1	0	1	1	0	Adrenergic receptor antagonist	ADRA1A|ADRA1D|ADRA1B|ADRA2B|ADRA2C	-0.6516	1.7229	-1.6928
REP.A016_HEK293_24H:I19	BRD-K54256913	MK-1775	HEK293	trt_cp	10 uM	24 h	3	566	0.6963	0.6348	1	1	1	1	0	WEE1 kinase inhibitor	WEE1	-0.6514	1.721	-1.6922
CPD001_MCF7_6H:O08	BRD-K99063460	didanosine	MCF7	trt_cp	10 uM	6 h	3	144	0.1764	0.161161	1	0	1	1	0	Nucleoside reverse transcriptase inhibitor	PNP	-0.6513	1.7199	-1.6919
LJP007_HEPG2_24H:J24	BRD-K74065929	doramapimod	HEPG2	trt_cp	0.04 uM	24 h	2	181	0.6348	0.342759	0	0	1	1	0	P38 MAPK inhibitor	MAPK14|MAPK11|MAPK12|DDR2|MAPK13	-0.651	1.7184	-1.6913
REP.A027_MCF10A_24H:N21	BRD-K99604664	tanaproget	MCF10A	trt_cp	1.11 uM	24 h	3	142	0.1478	0.146491	0	0	1	1	0	Progesterone receptor agonist	PGR	-0.6507	1.716	-1.6904
MOAR007_PC3_24H:E04	BRD-A91822151	picrotin	PC3	trt_cp	10 uM	24 h	3	96	0.17	0.129179	1	0	1	1	0	GABA receptor antagonist	GLRA2|GLRA3|GLRB|GABRA1|GABRR1|GLRA1	-0.6506	1.7153	-1.6902
CPC014_PC3_6H:BRD-K43764301-001-07-6:10	BRD-K43764301	dexketoprofen	PC3	trt_cp	10 uM	6 h	4	155	0.18	0.168901	1	0	1	1	0	Cyclooxygenase inhibitor	PTGS2|PTGS1	-0.6505	1.7143	-1.6899
CPC016_NEU_24H:BRD-K92492521-001-01-1:10	BRD-K92492521	LY-255283	NEU	trt_cp	10 uM	24 h	2	41	0.06	0.0501531	0	0	1	1	0	Leukotriene receptor antagonist	LTB4R|LTB4R2	-0.6503	1.7127	-1.6894
CPC006_HCT116_6H:BRD-A67788537-001-01-7:120	BRD-A67788537	salermide	HCT116	trt_cp	125 uM	6 h	2	174	0.63	0.334792	0	0	1	1	0	SIRT inhibitor	SIRT1|SIRT2	-0.6503	1.7123	-1.6893
CPC015_NPC_24H:BRD-K60770992-066-15-1:10	BRD-K60770992	pergolide	NPC	trt_cp	10 uM	24 h	4	111	0.09	0.101068	0	0	1	1	0	Dopamine receptor agonist	DRD1|DRD2|ADRA2A|ADRA2B|ADRA2C|DRD3|DRD4|DRD5|HTR1A|HTR1B|HTR1D|HTR2A|HTR2B|HTR2C|KCNA5|ADRA1A|ADRA1B|ADRA1D	-0.6502	1.7116	-1.6891
CPC006_NOMO1_6H:BRD-A71390734-001-01-7:0.08	BRD-A71390734	idarubicin	NOMO1	trt_cp	0.08 uM	6 h	2	196	0.23	0.214695	1	1	1	1	0	Topoisomerase inhibitor	TOP2A	-0.6502	1.7117	-1.6891
REP.A020_HEK293_24H:F19	BRD-K86930074	cediranib	HEK293	trt_cp	10 uM	24 h	2	166	0.1491	0.159083	0	0	1	1	0	VEGFR inhibitor|KIT inhibitor	KDR|FLT1|FLT4|KIT|PDGFRB|CSF1R|FLT3|PDGFRA	-0.6502	1.7112	-1.689
REP.B005_YAPC_24H:O13	BRD-A11319535	beclomethasone-dipropionate	YAPC	trt_cp	2.22 uM	24 h	2	114	0.1705	0.140976	1	1	1	1	0	Immunosuppressant|Glucocorticoid receptor agonist	NR3C1|CYP3A5|ADGRG3	-0.6498	1.7075	-1.6881
LJP007_HELA_24H:A19	BRD-K51575138	TPCA-1	HELA	trt_cp	10 uM	24 h	3	375	0.4509	0.415802	1	1	1	1	0	IKK inhibitor	IKBKB	-0.6495	1.7046	-1.6873
REP.B020_A549_24H:B14	BRD-K83186168	AZD-1981	A549	trt_cp	0.74 uM	24 h	2	263	0.3785	0.319037	0	0	1	1	0	CRTH receptor antagonist	PTGDR2	-0.6493	1.7019	-1.6868
CPC015_MCF7_24H:BRD-K04548931-003-05-8:10	BRD-K04548931	epirubicin	MCF7	trt_cp	10 uM	24 h	2	531	0.63	0.584855	0	0	1	1	0	Topoisomerase inhibitor	TOP2A|CHD1	-0.6491	1.6993	-1.6863
CPC020_A375_6H:BRD-A79803969-003-13-8:10	BRD-A79803969	memantine	A375	trt_cp	10 uM	6 h	5	145	0.12	0.133384	1	0	1	1	0	Glutamate receptor antagonist	GRIN1|CYP2E1|CHRFAM7A|DRD2|GRIN2A|GRIN2B|GRIN3A|HTR3A	-0.6491	1.6997	-1.6863
CPC012_HT29_6H:BRD-K18855837-046-01-4:10	BRD-K18855837	varenicline	HT29	trt_cp	10 uM	6 h	4	231	0.2	0.217346	0	0	1	1	0	Acetylcholine receptor agonist	CHRNA4|CHRNB2|CHRNA3|CHRNA6|CHRNA7	-0.6491	1.6986	-1.6861
REP.B018_YAPC_24H:P03	BRD-A67097164	ifosfamide	YAPC	trt_cp	0.25 uM	24 h	2	391	0.3034	0.348279	0	0	1	1	0	DNA alkylating agent	CYP2B6|CYP3A5|CYP2A6|CYP2C18|CYP2C19|CYP2C8|CYP2C9|CYP3A4|CYP3A7|PTGS1	-0.6489	1.6974	-1.6858
REP.B026_JURKAT_24H:O11	BRD-K99383816	ftorafur	JURKAT	trt_cp	0.03 uM	24 h	2	75	0.0533	0.063933	0	0	1	1	0	Thymidylate synthase inhibitor	TYMS	-0.6489	1.6971	-1.6857
REP.B013_JURKAT_24H:D08	BRD-K37890730	camptothecin	JURKAT	trt_cp	0.74 uM	24 h	2	729	0.8415	0.791993	0	0	1	1	0	Topoisomerase inhibitor	TOP1|HIF1A	-0.6488	1.6956	-1.6853
CPC018_HT29_6H:BRD-K14765469-003-02-3:10	BRD-K14765469	vesamicol	HT29	trt_cp	10 uM	6 h	5	180	0.22	0.201223	1	0	1	1	0	Acetylcholinesterase inhibitor	SLC18A3	-0.6487	1.6952	-1.6852
REP.B001_YAPC_24H:C05	BRD-K25650355	physostigmine	YAPC	trt_cp	0.03 uM	24 h	2	127	0.2033	0.16248	0	0	1	1	0	Cholinesterase inhibitor|Acetylcholinesterase inhibitor	ACHE|BCHE	-0.6486	1.6943	-1.6849
CPC012_HCC515_6H:BRD-K18855837-046-01-4:10	BRD-K18855837	varenicline	HCC515	trt_cp	10 uM	6 h	3	542	0.09	0.223332	1	0	1	1	0	Acetylcholine receptor agonist	CHRNA4|CHRNB2|CHRNA3|CHRNA6|CHRNA7	-0.6481	1.6887	-1.6836
MOAR015_HAP1.SRC_24H:E19	BRD-K61860715	ZG-10	HAP1	trt_cp	3.33 uM	24 h	3	328	0.5776	0.44013	0	0	1	1	0	JNK inhibitor	IRAK1	-0.6481	1.6888	-1.6836
CPC012_ASC_24H:BRD-K47761761-050-04-5:10	BRD-K47761761	PD-168077	ASC	trt_cp	10 uM	24 h	4	221	0.26	0.242389	1	0	1	1	0	Dopamine receptor agonist	DRD4|DRD2	-0.648	1.6875	-1.6834
CPC017_ASC_24H:BRD-K43389675-001-01-3:10	BRD-K43389675	daunorubicin	ASC	trt_cp	10 uM	24 h	2	672	0.7	0.693528	0	0	1	1	0	RNA synthesis inhibitor|Topoisomerase inhibitor	TOP2A|TOP2B	-0.648	1.687	-1.6833
CPC006_SW480_6H:BRD-A63646118-001-01-8:151.2	BRD-A63646118	fumonisin-b1	SW480	trt_cp	150 uM	6 h	2	150	0.14	0.146535	0	0	1	1	0	Sphingosine kinase inhibitor	CERS1	-0.648	1.687	-1.6833
EMU001_OCILY19_24H:G19	BRD-K45995181	auranofin	OCILY19	trt_cp	10 uM	24 h	2	853	0.8772	0.87469	0	0	1	1	0	NFKB inhibitor	TXNRD1|TXNRD2|IKBKB|PRDX5|TRPA1	-0.6479	1.6864	-1.6832
PBIOA018_HCC515_24H:A13	BRD-A10523515	GSK-429286A	HCC515	trt_cp	10 uM	24 h	2	249	0.44	0.334701	1	1	1	1	0	Rho associated kinase inhibitor	ROCK1	-0.648	1.6869	-1.6832
CPC006_NCIH596_6H:BRD-A34255068-001-16-2:10	BRD-A34255068	rolipram	NCIH596	trt_cp	10 uM	6 h	2	80	0.14	0.107014	1	0	1	1	0	Phosphodiesterase inhibitor	PDE4A|PDE4B|PDE4D|PDE4C	-0.6479	1.6862	-1.6831
CPC015_ASC_24H:BRD-K46937689-001-08-5:10	BRD-K46937689	phenazone	ASC	trt_cp	10 uM	24 h	4	291	0.14	0.204099	0	0	1	1	0	Cyclooxygenase inhibitor	PTGS1|PTGS2	-0.6477	1.6817	-1.6826
REP.A006_MCF7_24H:P14	BRD-A24514565	warfarin	MCF7	trt_cp	3.33 uM	24 h	3	278	0.4056	0.339549	1	1	1	1	0	Vitamin K antagonist	VKORC1|CYP2C19|CYP2C8|CYP4F2	-0.6475	1.6765	-1.6821
CPD003_MCF7_24H:L12	BRD-A77291778	cyclopentolate	MCF7	trt_cp	10 uM	24 h	3	47	0.0765	0.0606332	1	0	1	1	0	Acetylcholine receptor antagonist	CHRM1	-0.6475	1.6746	-1.682
CPC007_PC3_24H:BRD-K03067624-003-19-3:10	BRD-K03067624	emetine	PC3	trt_cp	10 uM	24 h	4	626	0.65	0.645022	0	0	1	1	0	Protein synthesis inhibitor	RPS2	-0.647	1.6447	-1.6808
CPC020_HCC515_6H:BRD-K90027355-001-10-9:10	BRD-K90027355	spironolactone	HCC515	trt_cp	10 uM	6 h	2	118	0.1	0.109843	1	0	1	1	0	Mineralocorticoid receptor antagonist	NR3C2|KCNA5|KCND3|SCNN1A|AR|CACNA1A|CACNA1B|CACNA1C|CACNA1D|CACNA1F|CACNA1G|CACNA1H|CACNA1I|CACNA1S|CACNA2D1|CACNA2D2|CACNA2D3|CACNB1|CACNB2|CACNB3|CACNB4|CACNG1|CYP11B2|NR3C1|PGR|SHBG	-0.6469	1.6306	-1.6806
CPC013_NPC_24H:BRD-K19416115-001-02-0:10	BRD-K19416115	sitagliptin	NPC	trt_cp	10 uM	24 h	3	404	0.13	0.231736	0	0	1	1	0	Dipeptidyl peptidase inhibitor	DPP4|CYP2C8|FASLG|HMGCR|SLC22A8	-0.6469	1.618	-1.6805
TAA001_SHSY5Y_24H:D13	BRD-K03406345	azacitidine	SHSY5Y	trt_cp	10 uM	24 h	3	495	0.74	0.611997	0	0	1	1	0	DNA inhibitor	DNMT1|DNMT3A	-0.6469	1.6198	-1.6805
CPC013_ASC_24H:BRD-K07881437-001-01-2:10	BRD-K07881437	danusertib	ASC	trt_cp	10 uM	24 h	4	235	0.4	0.310023	0	0	1	1	0	Aurora kinase inhibitor|FGFR inhibitor	AURKA|AURKB|AURKC|FGFR1|NTRK1|RET|BCR|SLK	-0.6468	1.6102	-1.6803
CPC001_HA1E_24H:BRD-K05181084-003-02-9:10	BRD-K05181084	NGB-2904	HA1E	trt_cp	10 uM	24 h	3	91	0.16	0.122014	1	0	1	1	0	Dopamine receptor antagonist	DRD3	-0.6468	1.6108	-1.6803
CPC018_SKB_24H:BRD-A20589515-001-01-1:10	BRD-A20589515	dihydroxyphenylglycine	SKB	trt_cp	10 uM	24 h	3	389	0.35	0.373112	0	0	1	1	0	Glutamate receptor agonist	GRM1|GRM5	-0.6465	1.6017	-1.6794
REP.B011_MDAMB231_24H:E10	BRD-K05236810	luteolin	MDAMB231	trt_cp	0.08 uM	24 h	2	355	0.3037	0.332022	0	0	1	1	0	Glucosidase inhibitor	AKR1B1|GAA|MAOA|XDH|TOP1	-0.6465	1.6011	-1.6793
REP.B010_HT29_24H:B12	BRD-A11990600	lorazepam	HT29	trt_cp	0.01 uM	24 h	2	95	0.0861	0.0914522	1	0	1	1	0	Benzodiazepine receptor agonist	GABRA1|GABRA2|GABRA3|GABRA5|GABRA4|GABRA6|GABRB1|GABRB2|GABRB3|GABRD|GABRE|GABRG1|GABRG2|GABRG3|GABRP|GABRQ|TSPO	-0.6463	1.5991	-1.679
REP.A017_HA1E_24H:N01	BRD-A67616246	levomequitazine	HA1E	trt_cp	10 uM	24 h	3	199	0.2829	0.239924	1	1	1	1	0	Histamine receptor antagonist	HRH1|HRH4|PDE4A	-0.646	1.5972	-1.6783
REP.A025_YAPC_24H:I01	BRD-K74514084	pazopanib	YAPC	trt_cp	10 uM	24 h	3	321	0.548	0.424105	1	1	1	1	0	VEGFR inhibitor|KIT inhibitor|PDGFR inhibitor	KDR|KIT|FLT1|FLT4|PDGFRB|PDGFRA|BRAF|CYP2B6|CYP2C8|CYP2E1|DDR2|CSF1R|FGF1|FGFR1|FGFR3|ITK|SH2B3	-0.6461	1.5973	-1.6783
CPC016_A549_6H:BRD-K93332168-001-03-2:10	BRD-K93332168	isocarboxazid	A549	trt_cp	10 uM	6 h	2	120	0.39	0.218753	0	0	1	1	0	Monoamine oxidase inhibitor	MAOA|MAOB	-0.6458	1.597	-1.6776
CPC012_HA1E_6H:BRD-A67438293-001-01-3:10	BRD-A67438293	treprostinil	HA1E	trt_cp	10 uM	6 h	3	175	0.38	0.26076	1	0	1	1	0	Prostacyclin analog	PTGIR	-0.6456	1.597	-1.6771
CPC006_NOMO1_6H:BRD-K12502280-001-01-5:11.1	BRD-K12502280	TG-101348	NOMO1	trt_cp	12 uM	6 h	2	191	0.63	0.350766	1	1	1	1	0	JAK inhibitor|FLT3 inhibitor	JAK2|FLT3|RET|BRD4|JAK1|JAK3|TYK2	-0.6454	1.597	-1.6767
REP.A013_A549_24H:C09	BRD-K37872686	tirofiban	A549	trt_cp	1.11 uM	24 h	3	104	0.1631	0.131696	1	0	1	1	0	Platelet aggregation inhibitor|Structural glycoprotein antagonist	ITGA2B|ITGB3	-0.645	1.5967	-1.6755
CPC018_NPC_24H:BRD-K63606607-001-01-8:10	BRD-K63606607	bufalin	NPC	trt_cp	10 uM	24 h	3	631	0.71	0.676822	0	0	1	1	0	Na/K-ATPase inhibitor	ATP1A1	-0.6448	1.5962	-1.675
REP.B021_PC3_24H:P01	BRD-A86248581	tetrahydrouridine	PC3	trt_cp	2.22 uM	24 h	2	184	0.4393	0.287488	1	1	1	1	0	Cytidine deaminase inhibitor	CDA	-0.6448	1.596	-1.6749
REP.B011_YAPC_24H:J01	BRD-K06335600	tizanidine	YAPC	trt_cp	2.22 uM	24 h	2	482	0.6942	0.58492	0	0	1	1	0	Adrenergic receptor agonist	CYP1A2|ADRA2A|ADRA2B|ADRA2C|NISCH	-0.6447	1.5955	-1.6748
REP.A012_JURKAT_24H:B20	BRD-A00376169	KBG	JURKAT	trt_cp	3.33 uM	24 h	3	372	0.3084	0.342499	1	0	1	1	0	Neprilysin inhibitor	MME	-0.6447	1.5954	-1.6747
LJP007_MDAMB231_24H:B07	BRD-K22096725	ALW-II-49-7	MDAMB231	trt_cp	10 uM	24 h	2	144	0.3754	0.235103	1	1	1	1	0	Ephrin inhibitor	DDR1	-0.6443	1.5911	-1.6738
CPC016_A375_6H:BRD-A22684332-003-03-1:10	BRD-A22684332	procaterol	A375	trt_cp	10 uM	6 h	5	296	0.29	0.296262	1	1	1	1	0	Adrenergic receptor agonist	ADRB2	-0.6443	1.5906	-1.6737
CPC016_ASC_24H:BRD-K41337261-003-01-0:10	BRD-K41337261	ZM-306416	ASC	trt_cp	10 uM	24 h	3	440	0.63	0.532387	0	0	1	1	0	Abl inhibitor|Src inhibitor|VEGFR inhibitor	FLT1|KDR|EGFR|FLT4	-0.6442	1.5874	-1.6734
CPC005_A549_6H:BRD-A62021152-003-01-8:10	BRD-A62021152	WAY-161503	A549	trt_cp	10 uM	6 h	3	196	0.17	0.184579	1	0	1	1	0	Serotonin receptor agonist	HTR2C	-0.6441	1.5817	-1.6731
CPC016_A549_6H:BRD-K69600043-328-03-0:10	BRD-K69600043	thiethylperazine	A549	trt_cp	10 uM	6 h	2	157	0.35	0.237036	0	0	1	1	0	Dopamine receptor antagonist	DRD1|DRD2|DRD4	-0.6435	1.5524	-1.6718
CPC005_MCF7_6H:B22	BRD-K80639402	SB-258585	MCF7	trt_cp	10 uM	6 h	4	345	0.099	0.186878	1	0	1	1	0	Serotonin receptor antagonist	HTR6	-0.6435	1.5517	-1.6716
REP.A026_MCF10A_24H:A19	BRD-K87782578	AVL-292	MCF10A	trt_cp	10 uM	24 h	3	339	0.4391	0.390133	1	1	1	1	0	BTK inhibitor	BTK|EGFR|ITK|JAK3|YES1	-0.6433	1.5517	-1.6713
CPC014_ASC_24H:BRD-U33728988-000-01-6:10	BRD-U33728988	QL-X-138	ASC	trt_cp	10 uM	24 h	3	350	0.58	0.455595	0	0	1	1	0	MTOR inhibitor	BTK|JAK3|MKNK2|MTOR|PRKDC	-0.6434	1.5517	-1.6713
LUNG001_A549_24H:BRD-K16478699:10	BRD-K16478699	PLX-4720	A549	trt_cp	10 uM	24 h	2	150	0.3824	0.242178	1	1	1	1	0	RAF inhibitor	BRAF|KDR	-0.6433	1.5517	-1.6711
CPC017_ASC_24H:BRD-K96778649-001-03-2:10	BRD-K96778649	tyrphostin-47	ASC	trt_cp	10 uM	24 h	4	147	0.29	0.20878	1	0	1	1	0	EGFR inhibitor	EGFR	-0.6428	1.5517	-1.6698
REP.A008_YAPC_24H:G01	BRD-K60038276	irbesartan	YAPC	trt_cp	10 uM	24 h	3	288	0.2302	0.260363	0	0	1	1	0	Angiotensin receptor antagonist	AGTR1|JUN|SLC10A1	-0.6425	1.5517	-1.6691
CPC017_SKB_24H:BRD-K95785537-001-09-0:10	BRD-K95785537	PP-2	SKB	trt_cp	10 uM	24 h	2	162	0.04	0.0813988	0	0	1	1	0	Src inhibitor	SRC|LCK|ABL1|LYN|RIPK2	-0.6424	1.5517	-1.6689
AICHI002_OCILY19_24H:M12	BRD-K13662825	dinaciclib	OCILY19	trt_cp	0.01 uM	24 h	2	794	0.83	0.82088	0	0	1	1	0	CDK inhibitor	CDK1|CDK2|CDK9|CDK5|CCNT1	-0.6423	1.5517	-1.6686
EMU001_MINO_24H:K14	BRD-A28746609	paclitaxel	MINO	trt_cp	2.5 uM	24 h	3	720	0.8432	0.787884	1	1	1	1	0	Tubulin inhibitor	TUBB|NR1I2|ABCB1|CYP2C8|BCL2|MAP2|MAP4|MAPT|TLR4|TUBB1	-0.6422	1.5517	-1.6683
LJP007_MCF10A_24H:I19	BRD-K76694128	rebastinib	MCF10A	trt_cp	10 uM	24 h	3	210	0.4741	0.319062	1	1	1	1	0	Bcr-Abl inhibitor|TIE tyrosine kinase inhibitor|VEGFR inhibitor	ABL1|BCR|FLT3|FGR|HCK|KDR|LYN|TEK|SRC	-0.6421	1.5517	-1.668
CPC020_PC3_6H:BRD-K38775274-001-16-3:10	BRD-K38775274	dexamethasone	PC3	trt_cp	10 uM	6 h	5	157	0.2	0.179182	1	0	1	1	0	Glucocorticoid receptor agonist	NR3C1|CYP3A4|CYP3A5|ANXA1|NOS2|NR0B1|NR3C2	-0.6419	1.5517	-1.6676
REP.A006_HELA_24H:E22	BRD-K20008181	LCQ-908	HELA	trt_cp	0.37 uM	24 h	3	339	0.3291	0.337749	1	0	1	1	0	Diacylglycerol O acyltransferase inhibitor	DGAT1	-0.6418	1.5517	-1.6673
REP.B016_MDAMB231_24H:B19	BRD-K51324732	meglitinide	MDAMB231	trt_cp	2.22 uM	24 h	2	89	0.2916	0.162899	1	1	1	1	0	Potassium channel antagonist	ABCC8|KCNJ11|CCR2	-0.6417	1.5517	-1.6671
CPC003_HCC515_6H:BRD-K33211335-337-03-7:10	BRD-K33211335	BRD-K33211335	HCC515	trt_cp	10 uM	6 h	3	65	0.11	0.0855034	1	0	1	1	0	Glutamate receptor antagonist|Sigma receptor agonist	SIGMAR1|CYP3A5|GRIN1|CHRNA2|CHRNA3|CHRNA4|CHRNA7|CHRNB2|CHRNB4|CYBA|CYBB|GRIN3A|NCF1|NCF2|NCF4|OPRD1|OPRK1|OPRM1|PGRMC1|RAC1|RAC2|SLC6A2|SLC6A4	-0.6417	1.5517	-1.667
PAC003_U2OS_6H:BRD-K28307902-001-04-3:10	BRD-K28307902	flutamide	U2OS	trt_cp	10 uM	6 h	2	20	0.12	0.0495377	1	0	1	1	0	Androgen receptor antagonist	AR|CYP2C19|AHR	-0.6417	1.5517	-1.667
REP.A022_MDAMB231_24H:N13	BRD-K80700417	SGI-1776	MDAMB231	trt_cp	10 uM	24 h	3	487	0.6531	0.570276	0	0	1	1	0	PIM inhibitor	PIM1|FLT3|PIM2|PIM3	-0.6417	1.5517	-1.6669
CPC001_PC3_24H:B07	BRD-K27737647	H-89	PC3	trt_cp	10 uM	24 h	5	243	0.3089	0.27704	1	1	1	1	0	PKA inhibitor	PRKACA|KCNA2|KCNA3|KCNA5|KCNAB2|KCNC1|KCNC2|KCNC3|KCNE1|KCNE2|KCNE3|KCNE4|KCNH1|KCNH2|KCNQ1|KCNQ2|KCNQ3|KCNQ5|KCNS3|GSG2|PKIA	-0.6417	1.5517	-1.6669
CPC014_HT29_6H:BRD-K85985071-001-20-7:10	BRD-K85985071	ellipticine	HT29	trt_cp	10 uM	6 h	5	358	0.5	0.427816	0	0	1	1	0	Topoisomerase inhibitor	TOP2A|TOP2B	-0.6416	1.5517	-1.6667
CPC006_HCT116_6H:BRD-K56343971-001-02-3:10	BRD-K56343971	vemurafenib	HCT116	trt_cp	10 uM	6 h	2	368	0.67	0.502102	0	0	1	1	0	RAF inhibitor	BRAF|CYP2C19|CYP3A4|CYP3A5|RAF1	-0.6415	1.5517	-1.6666
CPC010_HT29_6H:BRD-K28029915-066-02-5:10	BRD-K28029915	dolasetron	HT29	trt_cp	10 uM	6 h	5	95	0.06	0.0763428	1	0	1	1	0	Serotonin receptor antagonist	HTR3A	-0.6415	1.5517	-1.6665
REP.B007_HELA_24H:P24	BRD-A51964809	halofantrine	HELA	trt_cp	0.01 uM	24 h	2	205	0.3904	0.286063	0	0	1	1	0	Antimalarial	CYP3A5|KCNH2|KCNN4	-0.6414	1.5517	-1.6662
REP.A003_JURKAT_24H:C07	BRD-K31731454	pemirolast	JURKAT	trt_cp	10 uM	24 h	2	281	0.6918	0.445835	0	0	1	1	0	Mediator release inhibitor	HRH1	-0.6413	1.5517	-1.6661
REP.A017_A375_24H:M07	BRD-K67680372	CI-966	A375	trt_cp	10 uM	24 h	3	123	0.1035	0.114092	1	0	1	1	0	GAT inhibitor	SLC6A1	-0.6413	1.5517	-1.6658
REP.A019_PC3_24H:A18	BRD-K44876623	zolpidem	PC3	trt_cp	0.04 uM	24 h	3	227	0.2069	0.219141	0	0	1	1	0	Benzodiazepine receptor agonist	GABRA1|GABRA2|GABRA3	-0.6412	1.5517	-1.6657
CPC006_H1299_6H:BRD-K56343971-001-02-3:10	BRD-K56343971	vemurafenib	H1299	trt_cp	10 uM	6 h	2	166	0.34	0.240228	0	0	1	1	0	RAF inhibitor	BRAF|CYP2C19|CYP3A4|CYP3A5|RAF1	-0.6411	1.5517	-1.6654
CPC018_SKB_24H:BRD-K06895174-001-01-0:10	BRD-K06895174	cisapride	SKB	trt_cp	10 uM	24 h	3	342	0.61	0.461858	0	0	1	1	0	Serotonin receptor agonist	HTR4|KCNH2|CYP2B6|CYP2C8|CYP3A5|CYP3A7|HTR2A|HTR3A	-0.6408	1.5517	-1.6648
REP.A028_PC3_24H:E04	BRD-A93353767	isoconazole	PC3	trt_cp	0.37 uM	24 h	2	151	0.1603	0.157321	0	0	1	1	0	Fungal lanosterol demethylase inhibitor	CYP17A1	-0.6409	1.5517	-1.6648
MOAR003_PC3_24H:F01	BRD-K06542892	ASP-3026	PC3	trt_cp	10 uM	24 h	2	331	0.648	0.468309	1	1	1	1	0	ALK inhibitor	ALK	-0.6408	1.5517	-1.6646
LJP001_HS578T_24H:BRD-K64800655-001-03-3:2	BRD-K64800655	PHA-793887	HS578T	trt_cp	2.22 uM	24 h	3	352	0.58	0.456894	0	0	1	1	0	CDK inhibitor	CDK1|CDK2|CDK4|CDK5|CCND1|CCNE1|CDK7|CDK9	-0.6407	1.5517	-1.6644
PBIOA015_PC3_24H:J01	BRD-K14870255	R-428	PC3	trt_cp	10 uM	24 h	3	279	0.45	0.358294	1	1	1	1	0	AXL kinase inhibitor	AXL	-0.6407	1.5517	-1.6644
REP.A011_A375_24H:M13	BRD-A07395371	esmolol	A375	trt_cp	10 uM	24 h	3	98	0.3177	0.178424	0	0	1	1	0	Adrenergic receptor antagonist	ADRB1	-0.6407	1.5517	-1.6644
CPC003_HA1E_6H:BRD-K06014311-001-01-2:10	BRD-K06014311	DH-97	HA1E	trt_cp	10 uM	6 h	2	262	0.02	0.0731975	0	0	1	1	0	Melatonin receptor antagonist	MTNR1B	-0.6405	1.5516	-1.664
MOAR017_HAP1.CDK4_24H:K03	BRD-K51313569	palbociclib	HAP1	trt_cp	3.33 uM	24 h	3	358	0.6301	0.48026	1	1	1	1	0	CDK inhibitor	CDK4|CDK6|CCND3	-0.6405	1.5516	-1.6638
REP.A010_HELA_24H:P19	BRD-A15435692	BMY-14802	HELA	trt_cp	10 uM	24 h	3	128	0.3785	0.222571	0	0	1	1	0	Sigma receptor antagonist	HTR1A|SIGMAR1	-0.6404	1.5516	-1.6636
CPC015_ASC_24H:BRD-A65449987-001-06-2:10	BRD-A65449987	flunisolide	ASC	trt_cp	10 uM	24 h	4	172	0.17	0.17291	0	0	1	1	0	Cytochrome P450 inhibitor	NR3C1	-0.6403	1.5515	-1.6634
MOAR019_A375_24H:H03	BRD-K04972057	I-BRD9	A375	trt_cp	3.33 uM	24 h	3	73	0.409	0.174724	1	1	1	1	0	Bromodomain inhibitor	BRD9	-0.6401	1.5508	-1.663
MOA001_A549_24H:M21	BRD-K21867462	GSK-2816126	A549	trt_cp	10 uM	24 h	3	120	0.31	0.19503	1	1	1	1	0	Histone lysine methyltransferase inhibitor	EZH2	-0.6401	1.5508	-1.6629
AICHI001_NALM6_24H:B13	BRD-K85402309	dovitinib	NALM6	trt_cp	10 uM	24 h	2	830	0.87	0.859269	0	0	1	1	0	EGFR inhibitor|FGFR inhibitor|FLT3 inhibitor|PDGFR inhibitor|VEGFR inhibitor	FGFR1|FLT1|KDR|EGFR|FGFR3|FLT3|FLT4|KIT|PDGFRB|CSF1R|FGFR2|INSR|PDGFRA	-0.6399	1.5493	-1.6622
REP.A019_MCF7_24H:L24	BRD-A49399758	desmopressin-acetate	MCF7	trt_cp	0.04 uM	24 h	3	289	0.3887	0.338912	0	0	1	1	0	Vasopressin receptor agonist	AVPR2|AVPR1A|AVPR1B|OXTR	-0.6397	1.5478	-1.6618
CPC007_HA1E_6H:BRD-K03067624-003-19-3:10	BRD-K03067624	emetine	HA1E	trt_cp	10 uM	6 h	3	559	0.67	0.618834	1	1	1	1	0	Protein synthesis inhibitor	RPS2	-0.6397	1.5479	-1.6618
REP.A002_HT29_24H:M24	BRD-A18043272	phensuximide	HT29	trt_cp	0.04 uM	24 h	3	189	0.2787	0.232076	0	0	1	1	0	Succinimide antiepileptic	CACNA1G|CACNA1H|CACNA1I	-0.6396	1.5464	-1.6615
CPC006_SW480_6H:BRD-A36318220-001-04-7:160	BRD-A36318220	necrostatin-1	SW480	trt_cp	150 uM	6 h	2	76	0.03	0.0482834	0	0	1	1	0	RIPK inhibitor	IDO1|KRR1|RIPK1	-0.6395	1.5432	-1.6612
CPC006_U937_6H:BRD-K49371609-310-01-1:0.09	BRD-K49371609	PIK-75	U937	trt_cp	0.08 uM	6 h	2	566	0.63	0.603822	1	1	1	1	0	PI3K inhibitor	PIK3CA|PIK3CB|PIK3CD|PIK3CG|PRKDC	-0.6394	1.543	-1.6611
CEGS001_NPC.170_24H:N17	BRD-K03194791	roflumilast	NPC	trt_cp	0.66 uM	24 h	3	150	0.36	0.234978	1	1	1	1	0	Phosphodiesterase inhibitor	PDE4A|PDE4B|PDE4C|PDE4D|CYP2B6|CYP2C19	-0.6394	1.5421	-1.661
REP.B012_PC3_24H:C01	BRD-K00494077	trovafloxacin	PC3	trt_cp	2.22 uM	24 h	2	140	0.4464	0.252788	0	0	1	1	0	Bacterial DNA inhibitor	TOP2A	-0.6393	1.5393	-1.6607
CPC017_ASC_24H:BRD-A25687296-300-03-5:10	BRD-A25687296	emetine	ASC	trt_cp	10 uM	24 h	3	535	0.8	0.661534	1	1	1	1	0	Protein synthesis inhibitor	RPS2	-0.6392	1.5375	-1.6606
REP.A020_HA1E_24H:I10	BRD-A86216746	varenicline	HA1E	trt_cp	0.37 uM	24 h	3	158	0.2845	0.214388	0	0	1	1	0	Acetylcholine receptor agonist	CHRNA4|CHRNB2|CHRNA3|CHRNA6|CHRNA7	-0.6392	1.5365	-1.6605
REP.B014_MCF7_24H:G09	BRD-K59524082	maribavir	MCF7	trt_cp	0.25 uM	24 h	2	94	0.0599	0.0758766	1	0	1	1	0	Protein kinase inhibitor	PYGM	-0.6391	1.5335	-1.6602
CPC015_ASC_24H:BRD-K45252063-001-06-0:10	BRD-K45252063	clofibrate	ASC	trt_cp	10 uM	24 h	4	219	0.07	0.125199	0	0	1	1	0	PPAR receptor agonist	PPARA|LPL	-0.639	1.5328	-1.6601
CPC016_NPC_24H:BRD-K20714604-003-01-1:10	BRD-K20714604	RS-56812	NPC	trt_cp	10 uM	24 h	4	309	0.44	0.372852	0	0	1	1	0	Serotonin receptor agonist	HTR3A	-0.639	1.533	-1.6601
REP.B020_THP1_24H:N03	BRD-K47869605	BRD-K47869605	THP1	trt_cp	0.25 uM	24 h	2	623	0.7519	0.692077	0	0	1	1	0	Tubulin inhibitor	IGF1R|TOP2A|TUBA4A|TUBB	-0.639	1.5331	-1.6601
CPC005_A375_6H:BRD-A02713983-001-02-0:10	BRD-A02713983	dihydrodeoxygedunin	A375	trt_cp	10 uM	6 h	3	166	0.21	0.188797	1	0	1	1	0	Growth factor receptor activator	NTRK2	-0.639	1.5317	-1.6599
CPC014_NPC_24H:BRD-K66615216-001-01-9:10	BRD-K66615216	moxifloxacin	NPC	trt_cp	10 uM	24 h	3	154	0.19	0.172969	0	0	1	1	0	Bacterial DNA inhibitor	TOP2A	-0.6389	1.5309	-1.6598
CPD001_MCF7_24H:BRD-K56699285-001-16-9:10	BRD-K56699285	metergoline	MCF7	trt_cp	10 uM	24 h	3	256	0.33	0.293905	0	0	1	1	0	Dopamine receptor agonist|Serotonin receptor antagonist	HTR2A|DRD2|HTR1A|HTR1B|HTR1D|HTR1E|HTR1F|HTR2B|HTR2C|HTR5A|HTR6|HTR7	-0.6388	1.5284	-1.6595
LJP007_HA1E_24H:M09	BRD-K99616396	motesanib	HA1E	trt_cp	1.11 uM	24 h	2	42	0.0189	0.0284896	1	1	1	1	0	KIT inhibitor|PDGFR inhibitor|VEGFR inhibitor	FLT1|FLT4|KDR|KIT|PDGFRA|RET	-0.6384	1.5242	-1.6584
REP.A018_MDAMB231_24H:E15	BRD-A63310107	miglitol	MDAMB231	trt_cp	1.11 uM	24 h	3	163	0.0841	0.118392	0	0	1	1	0	Glucosidase inhibitor	GAA|MGAM|SLC5A4|GANAB|GANC	-0.6383	1.5242	-1.6583
REP.B026_YAPC_24H:E02	BRD-K87156652	carbimazole	YAPC	trt_cp	0.74 uM	24 h	2	229	0.3346	0.279905	1	1	1	1	0	Antithyroid agent	TPO	-0.6381	1.5242	-1.6577
CPD001_MCF7_24H:BRD-A99633051-001-06-2:10	BRD-A99633051	ethosuximide	MCF7	trt_cp	10 uM	24 h	3	83	0.24	0.142717	1	0	1	1	0	Succinimide antiepileptic	CACNA1G|CACNA1H|CACNA1I	-0.638	1.5242	-1.6573
CPC006_VCAP_6H:BRD-K26664453-001-03-4:10	BRD-K26664453	BRD-K26664453	VCAP	trt_cp	10 uM	6 h	4	108	0.33	0.190897	1	1	1	1	0	Tubulin inhibitor	ACTB	-0.638	1.5242	-1.6573
CPC015_A375_6H:BRD-A35511923-019-01-6:10	BRD-A35511923	L-803087	A375	trt_cp	10 uM	6 h	3	101	0.15	0.124462	1	0	1	1	0	Somatostatin receptor agonist	SSTR4	-0.6379	1.5242	-1.6571
LJP007_HEPG2_24H:O23	BRD-K31313613	BS-181	HEPG2	trt_cp	0.12 uM	24 h	2	127	0.4469	0.2409	0	0	1	1	0	CDK inhibitor	CDK7	-0.6379	1.5242	-1.6571
REP.B006_HA1E_24H:J24	BRD-K21884483	mizolastine	HA1E	trt_cp	0.01 uM	24 h	2	295	0.5194	0.395815	1	1	1	1	0	Histamine receptor antagonist	HRH1	-0.6377	1.5242	-1.6567
REP.B013_PC3_24H:M17	BRD-K43164539	cholic-acid	PC3	trt_cp	0.03 uM	24 h	2	76	0.2379	0.135967	0	0	1	1	0	Bile acid	CES1|FECH|PLA2G1B|ADH1C|COX1|COX2|COX3|COX4I1|COX5A|COX5B|COX6A2|COX6B1|COX6C|COX7A1|COX7B|COX7C|COX8A|ESRRG|FABP6|GPBAR1	-0.6378	1.5242	-1.6567
REP.A026_HUVEC.A_24H:B15	BRD-K87737963	CYT-387	HUVEC	trt_cp	1.11 uM	24 h	3	321	0.3988	0.361793	0	0	1	1	0	JAK inhibitor	JAK1|JAK2|JAK3	-0.6375	1.5242	-1.6561
REP.A004_PC3_24H:H01	BRD-K22024824	RG-4733	PC3	trt_cp	10 uM	24 h	3	92	0.2297	0.146996	1	1	1	1	0	Gamma secretase inhibitor	NOTCH1|PSEN1	-0.6375	1.5242	-1.656
REP.A018_MCF10A_24H:P24	BRD-A67516570	lafutidine	MCF10A	trt_cp	0.04 uM	24 h	2	133	0.2375	0.179717	0	0	1	1	0	Histamine receptor antagonist	HRH2	-0.6374	1.5242	-1.6557
CPC015_NPC_24H:BRD-K76805682-001-05-0:10	BRD-K76805682	SB-415286	NPC	trt_cp	10 uM	24 h	4	397	0.18	0.27031	0	0	1	1	0	GSK inhibitor	GSK3B|GSK3A|RPS6KB1	-0.6372	1.5242	-1.6553
AICHI002_KMS34_24H:D01	BRD-K24666289	copanlisib	KMS34	trt_cp	10 uM	24 h	3	630	0.81	0.722343	1	1	1	1	0	PI3K inhibitor	PIK3CA|PIK3CD|PIK3CB|PIK3CG	-0.6371	1.5242	-1.6551
CPC018_SKB_24H:BRD-K73290745-003-01-8:10	BRD-K73290745	ICI-199441	SKB	trt_cp	10 uM	24 h	2	116	0.32	0.19482	0	0	1	1	0	Opioid receptor agonist	OPRK1|CYP2D6|OPRD1|OPRM1|UTS2R	-0.6371	1.5242	-1.655
CPC010_A375_6H:N05	BRD-K64835161	ML-167	A375	trt_cp	10 uM	6 h	3	106	0.2268	0.156785	1	1	1	1	0	CLK inhibitor|DYRK inhibitor	CLK4|DYRK1B|CLK1|DYRK1A	-0.6369	1.5242	-1.6546
CPD002_PC3_6H:BRD-A72988804-001-07-9:10	BRD-A72988804	tiaprofenic-acid	PC3	trt_cp	10 uM	6 h	3	292	0.44	0.36245	0	0	1	1	0	Cyclooxygenase inhibitor	PTGS2|PTGS1	-0.6369	1.5242	-1.6544
CPC016_NPC_24H:BRD-K59522102-001-08-8:10	BRD-K59522102	piperine	NPC	trt_cp	10 uM	24 h	4	102	0.06	0.0791054	0	0	1	1	0	Monoamine oxidase inhibitor	MAOA|MAOB|TRPV1	-0.6368	1.5242	-1.6543
CPC006_NOMO1_6H:BRD-A67788537-001-01-7:120	BRD-A67788537	salermide	NOMO1	trt_cp	125 uM	6 h	2	206	0.58	0.349525	1	1	1	1	0	SIRT inhibitor	SIRT1|SIRT2	-0.6366	1.5242	-1.6539
CPC006_HCT116_6H:BRD-K30677119-001-01-0:11.1	BRD-K30677119	PP-30	HCT116	trt_cp	12 uM	6 h	2	176	0.53	0.308834	1	1	1	1	0	RAF inhibitor	RAF1	-0.6367	1.5242	-1.6539
CPC003_HCC515_6H:BRD-K91315211-300-03-2:10	BRD-K91315211	betahistine	HCC515	trt_cp	10 uM	6 h	3	213	0.03	0.0808316	1	0	1	1	0	Histamine receptor agonist|Histamine receptor antagonist	HRH3|HRH1	-0.6366	1.5242	-1.6537
CPC017_SKB_24H:BRD-K76840893-003-01-7:10	BRD-K76840893	RS-17053	SKB	trt_cp	10 uM	24 h	2	151	0.13	0.141674	0	0	1	1	0	Adrenergic receptor antagonist	ADRA1A|ADRA1D	-0.6365	1.5242	-1.6535
REP.B016_HT29_24H:P20	BRD-K64990520	apocynin	HT29	trt_cp	0.74 uM	24 h	2	177	0.393	0.266694	1	1	1	1	0	NADPH inhibitor	NOX3|NOX4	-0.6364	1.5242	-1.6533
REP.B010_HEK293_24H:J07	BRD-K13819402	desoxypeganine	HEK293	trt_cp	2.22 uM	24 h	2	218	0.3152	0.265065	0	0	1	1	0	Acetylcholinesterase inhibitor|Monoamine oxidase inhibitor	ACHE|MAOA	-0.6363	1.5242	-1.653
CPC018_SKB_24H:BRD-K30816563-003-01-1:10	BRD-K30816563	ranitidine	SKB	trt_cp	10 uM	24 h	3	44	0.12	0.0734763	1	0	1	1	0	Histamine receptor antagonist	HRH2|SLC22A2	-0.6363	1.5242	-1.653
REP.B012_MCF10A_24H:G22	BRD-A01787639	naftopidil	MCF10A	trt_cp	0.08 uM	24 h	2	92	0.432	0.201589	0	0	1	1	0	Adrenergic receptor antagonist	ADRA1D|ADRA1A	-0.6361	1.5242	-1.6524
CPC015_SKB_24H:BRD-K04548931-003-05-8:10	BRD-K04548931	epirubicin	SKB	trt_cp	10 uM	24 h	2	428	0.61	0.516675	0	0	1	1	0	Topoisomerase inhibitor	TOP2A|CHD1	-0.636	1.5242	-1.6523
CPC013_SKB_24H:BRD-K51967704-001-01-0:10	BRD-K51967704	BIIB-021	SKB	trt_cp	10 uM	24 h	4	487	0.41	0.451842	0	0	1	1	0	HSP inhibitor	AOX1|HSP90AA1	-0.6361	1.5242	-1.6523
PAC004_U2OS_6H:BRD-K11129031-001-04-4:10	BRD-K11129031	gemfibrozil	U2OS	trt_cp	10 uM	6 h	2	49	0.12	0.0775388	1	0	1	1	0	Lipoprotein lipase activator	PPARA|CYP2C8|LPL|SLCO1B1|SLCO1B3|SLCO2B1	-0.6359	1.5241	-1.6519
CPC005_HCC515_6H:BRD-A65145453-001-02-0:10	BRD-A65145453	ATPA	HCC515	trt_cp	10 uM	6 h	2	75	0.09	0.0830773	1	0	1	1	0	Glutamate receptor agonist	GRIK1|GRIA2	-0.6356	1.5234	-1.651
CPC013_NPC_24H:BRD-K29905972-001-03-0:10	BRD-K29905972	axitinib	NPC	trt_cp	10 uM	24 h	3	503	0.65	0.578191	0	0	1	1	0	VEGFR inhibitor|PDGFR inhibitor	KDR|FLT1|FLT4|CYP2C19|CYP3A5|KIT|PDGFRB|CSF1|PLK4	-0.6354	1.5225	-1.6506
LJP007_ASC.C_24H:F02	BRD-K73319509	PF-04217903	ASC	trt_cp	3.33 uM	24 h	3	143	0.3574	0.2286	1	1	1	1	0	MET inhibitor	MET	-0.6353	1.5218	-1.6503
CPC012_HA1E_6H:BRD-K18855837-046-01-4:10	BRD-K18855837	varenicline	HA1E	trt_cp	10 uM	6 h	3	252	0.31	0.282626	1	0	1	1	0	Acetylcholine receptor agonist	CHRNA4|CHRNB2|CHRNA3|CHRNA6|CHRNA7	-0.6352	1.5212	-1.6501
CPC002_HA1E_24H:BRD-K91370081-001-10-3:10	BRD-K91370081	anisomycin	HA1E	trt_cp	10 uM	24 h	3	719	0.85	0.790505	1	1	1	1	0	DNA inhibitor	RPL10L|RPL11|RPL13A|RPL15|RPL19|RPL23|RPL23A|RPL26L1|RPL3|RPL37|RPL8|RSL24D1|SNU13	-0.6351	1.521	-1.6499
EMU001_SKMEL5_24H:F24	BRD-K92723993	imatinib	SKMEL5	trt_cp	0.01 uM	24 h	3	132	0.2145	0.17015	1	0	1	1	0	PDGFR inhibitor|Bcr-Abl inhibitor|KIT inhibitor	ABL1|KIT|PDGFRA|BCR|CSF1R|PDGFRB|ABCG2|CYP2C19|CYP2C8|CYP3A5|DDR1|NTRK1|RET	-0.6351	1.521	-1.6499
REP.B004_HT29_24H:B21	BRD-K19284129	salvinorin-a	HT29	trt_cp	0.25 uM	24 h	2	109	0.0737	0.0906312	0	0	1	1	0	Opioid receptor agonist	OPRK1|OPRD1|OPRM1	-0.6351	1.5208	-1.6498
CPC015_SKB_24H:BRD-K59632282-052-02-3:10	BRD-K59632282	quinidine	SKB	trt_cp	10 uM	24 h	2	136	0.25	0.186453	0	0	1	1	0	Sodium channel inhibitor	SCN5A|ABCB1|CYP2D6|KCNA5|KCNA7|KCNH1|KCNH2|KCNH5|KCNK1|KCNK6|SLC29A4	-0.6351	1.5209	-1.6498
CPD002_MCF7_24H:BRD-K16606819-001-09-3:10	BRD-K16606819	trimethadione	MCF7	trt_cp	10 uM	24 h	3	98	0.12	0.109656	1	0	1	1	0	Oxazolidine antiepileptic	CACNA1G|CACNA1H|CACNA1I	-0.635	1.5205	-1.6497
CPC011_MCF7_24H:BRD-K39621635-001-04-8:10	BRD-K39621635	artemether	MCF7	trt_cp	10 uM	24 h	2	412	0.2	0.290265	0	0	1	1	0	Antimalarial	CYP2B6|CYP2C19|CYP3A5|ATP1A1	-0.635	1.52	-1.6496
REP.A021_A549_24H:C07	BRD-K81458380	CX-4945	A549	trt_cp	10 uM	24 h	3	386	0.5078	0.447683	0	0	1	1	0	Casein kinase inhibitor	CSNK2A1|CSNK2A2|CSNK2B|DAPK3|HIPK3	-0.635	1.5196	-1.6495
KTOX002_HPTEC_24H:BRD-K86307448:1000	BRD-K86307448	allopurinol	HPTEC	trt_cp	1000 uM	24 h	3	123	0.42	0.229831	1	1	1	1	0	Xanthine oxidase inhibitor	XDH	-0.6349	1.5194	-1.6494
AICHI002_KMS34_24H:C07	BRD-K54997624	alpelisib	KMS34	trt_cp	10 uM	24 h	3	626	0.73	0.683564	1	1	1	1	0	PI3K inhibitor	PIK3CA|PIK3CB|PIK3CD|PIK3CG	-0.6349	1.5187	-1.6493
REP.B022_YAPC_24H:N24	BRD-A81233518	glycopyrrolate	YAPC	trt_cp	0.01 uM	24 h	2	98	0.0769	0.0877823	1	0	1	1	0	Acetylcholine receptor antagonist	CHRM3|CHRM1|CHRM2|CHRM4|CHRM5	-0.6349	1.5191	-1.6493
REP.B016_HT29_24H:B24	BRD-K51324732	meglitinide	HT29	trt_cp	0.01 uM	24 h	2	155	0.3184	0.224638	1	1	1	1	0	Potassium channel antagonist	ABCC8|KCNJ11|CCR2	-0.6348	1.5181	-1.6491
REP.A014_HT29_24H:B24	BRD-K56558538	ambroxol	HT29	trt_cp	0.04 uM	24 h	3	288	0.3527	0.322277	1	0	1	1	0	Sodium channel inhibitor	GBA|CYP3A4	-0.6348	1.5182	-1.6491
CPC006_NCIH596_6H:BRD-K83213911-001-02-8:80	BRD-K83213911	PF-750	NCIH596	trt_cp	80 uM	6 h	2	90	0.3	0.166155	1	1	1	1	0	FAAH inhibitor	FAAH	-0.6348	1.5177	-1.649
CPC016_HEPG2_6H:BRD-K80396088-001-03-9:10	BRD-K80396088	gliquidone	HEPG2	trt_cp	10 uM	6 h	2	347	0.07	0.157596	0	0	1	1	0	Sulfonylurea	ABCC8|KCNJ11|KCNJ10|KCNJ8	-0.6347	1.5174	-1.6489
REP.A027_A375_24H:J19	BRD-A97674275	ranolazine	A375	trt_cp	10 uM	24 h	3	170	0.2292	0.199601	0	0	1	1	0	Sodium channel inhibitor	SCN5A|SCN9A|SLC22A2|SCN10A|SCN4A	-0.6347	1.5169	-1.6488
CPC011_A375_6H:BRD-A86044036-001-22-4:10	BRD-A86044036	flurbiprofen	A375	trt_cp	10 uM	6 h	3	387	0.18	0.266884	1	0	1	1	0	Cyclooxygenase inhibitor	PTGS1|PTGS2	-0.6347	1.5169	-1.6488
HOG001_A549_24H:BRD-A19633847-050-20-6:3.33	BRD-A19633847	perhexiline	A549	trt_cp	3.33 uM	24 h	3	100	0.37	0.194505	1	1	1	1	0	Carnitine palmitoyltransferase inhibitor	CPT1A|CPT2	-0.6346	1.516	-1.6487
LUNG001_A549_24H:BRD-K47105409:10	BRD-K47105409	AG-490	A549	trt_cp	10 uM	24 h	2	66	0.2237	0.122867	1	1	1	1	0	EGFR inhibitor|ERBB2 inhibitor|JAK inhibitor	JAK2|JAK3|STAT3|EGFR	-0.6347	1.5165	-1.6487
NMH002_FIBRNPC_24H:BRD-K79437791-001-04-0:10	BRD-K79437791	BRD-K79437791	NPC	trt_cp	10 uM	24 h	3	276	0.25	0.265617	1	0	1	1	0	Inhibitor of methylation of endogenous isoprenylated proteins	PPARG	-0.6346	1.5158	-1.6486
CPC013_SKB_24H:BRD-K15592317-001-01-0:10	BRD-K15592317	CP-466722	SKB	trt_cp	10 uM	24 h	3	149	0.27	0.202818	0	0	1	1	0	ATM kinase inhibitor	ATM	-0.6346	1.5148	-1.6485
REP.A016_A375_24H:H03	BRD-A53176877	methylprednisolone	A375	trt_cp	1.11 uM	24 h	3	167	0.3827	0.255634	1	1	1	1	0	Glucocorticoid receptor agonist	NR3C1	-0.6346	1.515	-1.6485
CPC006_NCIH2073_6H:BRD-K68065987-300-03-4:10	BRD-K68065987	MK-2206	NCIH2073	trt_cp	10 uM	6 h	2	101	0.19	0.140077	0	0	1	1	0	AKT inhibitor	AKT1|AKT2|AKT3	-0.6346	1.5151	-1.6485
CPC018_SKB_24H:BRD-A91699651-316-06-7:10	BRD-A91699651	chloroquine	SKB	trt_cp	10 uM	24 h	3	207	0.26	0.234586	0	0	1	1	0	Antimalarial	CYP2C8|GSTA2|MRGPRX1|TLR9|TNF	-0.6344	1.5115	-1.648
REP.B010_MCF10A_24H:F24	BRD-A13084692	troglitazone	MCF10A	trt_cp	0.01 uM	24 h	2	167	0.5579	0.308651	1	1	1	1	0	PPAR receptor agonist|Insulin sensitizer	PPARG|AKR1B1|CCL2|CYP3A4|INS|ACSL4|ESRRA|ESRRG|SERPINE1|SLC29A1|TRPM3	-0.6343	1.5103	-1.6478
CPC003_VCAP_6H:BRD-K41567364-001-01-2:10	BRD-K41567364	SB-334867	VCAP	trt_cp	10 uM	6 h	5	164	0.08	0.115824	0	0	1	1	0	Orexin receptor antagonist	HCRTR1|HCRTR2	-0.6343	1.5089	-1.6477
CPC001_HCC515_24H:BRD-K87510569-001-01-0:10	BRD-K87510569	RS-504393	HCC515	trt_cp	10 uM	24 h	2	347	0.6	0.461393	1	1	1	1	0	CC chemokine receptor antagonist	CCR2|CCL2	-0.6342	1.5077	-1.6476
CPC015_ASC_24H:BRD-A40639672-234-09-9:10	BRD-A40639672	ketorolac	ASC	trt_cp	10 uM	24 h	4	194	0.21	0.204099	0	0	1	1	0	Cyclooxygenase inhibitor	PTGS1|PTGS2	-0.6342	1.5077	-1.6475
CPC014_NPC_24H:BRD-K38615104-001-06-8:10	BRD-K38615104	A-443654	NPC	trt_cp	10 uM	24 h	2	683	0.79	0.74277	0	0	1	1	0	AKT inhibitor	AKT1|AKT2	-0.6341	1.5041	-1.6472
CPC006_U937_6H:BRD-K69328504-001-01-7:10	BRD-K69328504	L-690488	U937	trt_cp	10 uM	6 h	2	244	0.17	0.205944	1	1	1	1	0	Inositol monophosphatase inhibitor	IMPA1	-0.6339	1.4983	-1.6467
CPC018_SKB_24H:BRD-A11813248-003-01-6:10	BRD-A11813248	AM-92016	SKB	trt_cp	10 uM	24 h	3	447	0.22	0.3171	0	0	1	1	0	Potassium channel antagonist	GRIN2B|GRIN1	-0.6338	1.4966	-1.6466
REP.B005_A375_24H:I01	BRD-A09472452	flecainide	A375	trt_cp	2.22 uM	24 h	3	175	0.2463	0.209934	1	0	1	1	0	Sodium channel inhibitor	SCN5A|KCNA5|KCNA7|SCN4A	-0.6337	1.4891	-1.6462
REP.A020_JURKAT_24H:B23	BRD-K83508485	FK-888	JURKAT	trt_cp	0.125 uM	24 h	2	102	0.138	0.119969	0	0	1	1	0	Tachykinin antagonist	TACR1|TACR2	-0.6336	1.4855	-1.646
REP.A028_YAPC_24H:F03	BRD-A93424738	dexamethasone-acetate	YAPC	trt_cp	1.11 uM	24 h	2	168	0.4173	0.267738	0	0	1	1	0	Glucocorticoid receptor agonist|Corticosteroid agonist|Cytochrome P450 inhibitor	NR3C1	-0.6336	1.4829	-1.6458
CPC002_PC3_24H:BRD-K37312348-001-06-9:10	BRD-K37312348	kenpaullone	PC3	trt_cp	10 uM	24 h	5	405	0.48	0.44584	1	1	1	1	0	CDK inhibitor|GSK inhibitor	GSK3B|CDK1|CDK5|CDK2|LCK|CCNB1	-0.6334	1.4807	-1.6456
REP.B027_A549_24H:J23	BRD-A97674275	ranolazine	A549	trt_cp	0.03 uM	24 h	2	177	0.1312	0.154093	0	0	1	1	0	Sodium channel inhibitor	SCN5A|SCN9A|SLC22A2|SCN10A|SCN4A	-0.6334	1.4807	-1.6455
CPC006_SW480_6H:BRD-K34581968-001-01-2:11.1	BRD-K34581968	BMS-536924	SW480	trt_cp	12 uM	6 h	2	234	0.28	0.258832	0	0	1	1	0	IGF-1 inhibitor	IGF1R|INSR|AKT1|CCNE1|CDK2|CYP3A4|ERBB2|KDR|LCK|MAPK1|MET|PDGFRA|PDGFRB	-0.6334	1.4807	-1.6454
REP.B027_HA1E_24H:E09	BRD-A94756469	digoxin	HA1E	trt_cp	0.25 uM	24 h	2	543	0.7282	0.635852	1	1	1	1	0	Na/K-ATPase inhibitor	ATP1A1|ABCB1|RORC|SLCO1B3	-0.6333	1.4807	-1.6453
REP.B020_HEK293_24H:K15	BRD-K46018455	bezafibrate	HEK293	trt_cp	0.25 uM	24 h	2	186	0.2168	0.203056	0	0	1	1	0	PPAR receptor agonist	PPARA|PPARD|PPARG|HSD11B1|LPL	-0.633	1.4807	-1.6444
REP.A023_PC3_24H:C13	BRD-K68392338	ZK-93426	PC3	trt_cp	10 uM	24 h	3	140	0.1617	0.152142	1	1	1	1	0	Benzodiazepine receptor antagonist	GABRA1|GABRA2|GABRA3|GABRA5	-0.6328	1.4807	-1.6439
MOAR003_A375_24H:A14	BRD-K48141473	cebranopadol	A375	trt_cp	3.33 uM	24 h	3	386	0.5	0.444231	1	1	1	1	0	Opioid receptor agonist	OPRL1|OPRM1	-0.6327	1.4807	-1.6437
CPC006_SW480_6H:BRD-K06792661-001-01-9:10	BRD-K06792661	narciclasine	SW480	trt_cp	10 uM	6 h	2	345	0.25	0.296968	0	0	1	1	0	LIM kinase activator|Rho associated kinase activator	RHOA	-0.6327	1.4807	-1.6435
CPC015_NPC_24H:BRD-A34806832-001-02-7:10	BRD-A34806832	proscillaridin	NPC	trt_cp	10 uM	24 h	3	668	0.71	0.696383	0	0	1	1	0	Na/K-ATPase inhibitor	ATP1A1	-0.6326	1.4807	-1.6433
CPC006_MCF7_24H:B21	BRD-K18849474	dalcetrapib	MCF7	trt_cp	80 uM	24 h	5	368	0.2206	0.288109	0	0	1	1	0	Cholesterol inhibitor	CETP	-0.6326	1.4807	-1.6433
REP.A021_THP1_24H:A23	BRD-K19111024	clofibric-acid	THP1	trt_cp	0.125 uM	24 h	3	221	0.12	0.164671	0	0	1	1	0	PPAR receptor agonist	PPARA	-0.6325	1.4807	-1.6432
REP.A014_YAPC_24H:L19	BRD-A38350138	ketoconazole	YAPC	trt_cp	10 uM	24 h	3	206	0.4603	0.311376	1	1	1	1	0	Sterol demethylase inhibitor	AR|CYP19A1|CYP2C19|CYP3A5|CYP3A7|CYP21A2|KCNA10	-0.6326	1.4807	-1.6432
REP.B005_YAPC_24H:D08	BRD-A08545410	doxycycline	YAPC	trt_cp	0.74 uM	24 h	2	95	0.1417	0.117321	1	0	1	1	0	Bacterial 30S ribosomal subunit inhibitor	MMP8|MMP1	-0.6325	1.4807	-1.6431
CPC006_A549_6H:BRD-K01868942-001-02-1:160	BRD-K01868942	RS-23597-190	A549	trt_cp	150 uM	6 h	4	115	0.19	0.149471	1	0	1	1	0	Serotonin receptor antagonist	HTR4	-0.6324	1.4807	-1.643
REP.A025_YAPC_24H:A19	BRD-K98493452	honokiol	YAPC	trt_cp	10 uM	24 h	3	146	0.338	0.224629	1	1	1	1	0	AKT inhibitor	ALOX5|PTGS1|PTGS2	-0.6321	1.4807	-1.6422
REP.A026_YAPC_24H:L24	BRD-K92093830	doxorubicin	YAPC	trt_cp	0.04 uM	24 h	2	221	0.3997	0.300534	0	0	1	1	0	Topoisomerase inhibitor	TOP2A	-0.6321	1.4807	-1.6421
CPC017_HEPG2_6H:BRD-K79930101-300-01-1:10	BRD-K79930101	GW-583340	HEPG2	trt_cp	10 uM	6 h	3	103	0.13	0.117009	1	0	1	1	0	Receptor tyrosine protein kinase inhibitor|EGFR inhibitor|ERBB2 inhibitor	EGFR|ERBB2	-0.6317	1.4807	-1.6411
REP.A012_HA1E_24H:F01	BRD-K00911143	brexpiprazole	HA1E	trt_cp	10 uM	24 h	3	283	0.5021	0.38117	1	1	1	1	0	Dopamine receptor antagonist	DRD2|HTR1A|HTR2A|DRD3	-0.6317	1.4807	-1.6409
LJP006_HME1_3H:A14	BRD-K87909389	alvocidib	HME1	trt_cp	3.33 uM	3 h	3	396	0.65	0.513021	1	1	1	1	0	CDK inhibitor	CDK2|CDK4|CDK1|CDK6|CDK7|CDK9|CDK5|CDK8|EGFR|PYGM|BCL2|BIRC5|CCNT1|MCL1|XIAP	-0.6316	1.4807	-1.6408
REP.A001_PC3_24H:L01	BRD-K28984613	dutasteride	PC3	trt_cp	10 uM	24 h	3	199	0.2945	0.244793	1	1	1	1	0	5-alpha reductase inhibitor	SRD5A1|SRD5A2|CYP3A5	-0.6314	1.4807	-1.6402
CPC016_A375_6H:BRD-K56047318-001-03-0:10	BRD-K56047318	RHC-80267	A375	trt_cp	10 uM	6 h	4	252	0.2	0.22701	0	0	1	1	0	Triacylglycerol lipase inhibitor	LIPC|LIPE|LIPG|DAGLA|DAGLB	-0.6313	1.4807	-1.64
REP.B020_THP1_24H:L09	BRD-K45924332	amrinone	THP1	trt_cp	0.25 uM	24 h	2	155	0.1447	0.151437	0	0	1	1	0	Phosphodiesterase inhibitor	PDE3A|PDE3B|PDE4B|TNF	-0.6311	1.4807	-1.6396
CPC006_HCT116_6H:BRD-K56851771-001-02-7:0.25	BRD-K56851771	enzalutamide	HCT116	trt_cp	0.25 uM	6 h	2	272	0.65	0.425179	0	0	1	1	0	Androgen receptor antagonist	AR|CYP2C19|CYP2C8|CYP3A4	-0.6311	1.4807	-1.6394
REP.A014_YAPC_24H:L09	BRD-K37714784	ABT-724	YAPC	trt_cp	1.11 uM	24 h	2	54	0.1072	0.0769352	1	0	1	1	0	Dopamine receptor agonist	DRD4	-0.631	1.4807	-1.6393
REP.B024_HEK293_24H:B08	BRD-K73541271	etofenamate	HEK293	trt_cp	0.74 uM	24 h	2	95	0.0564	0.0740171	0	0	1	1	0	Cyclooxygenase inhibitor	PTGS1|PTGS2	-0.6308	1.4807	-1.6387
REP.A013_A375_24H:G01	BRD-K39974922	lenvatinib	A375	trt_cp	10 uM	24 h	3	202	0.5312	0.331234	0	0	1	1	0	FGFR inhibitor|KIT inhibitor|PDGFR inhibitor|VEGFR inhibitor	KDR|FLT4|FGFR1|FLT1|KIT|FGFR2|FGFR3|FGFR4|PDGFB|PDGFRB|RET	-0.6308	1.4807	-1.6387
REP.A015_HA1E_24H:F13	BRD-K57041787	dabigatran-etexilate	HA1E	trt_cp	10 uM	24 h	3	303	0.5384	0.408418	1	1	1	1	0	Thrombin inhibitor|Serine protease inhibitor	F2	-0.6307	1.4807	-1.6384
REP.B002_PC3_24H:O24	BRD-K18673820	folic-acid	PC3	trt_cp	0.01 uM	24 h	3	216	0.3433	0.275356	1	1	1	1	0	Folate receptor ligand	FOLR2|FOLR3|SLC19A1|SLC46A1	-0.6307	1.4807	-1.6384
REP.B015_HT29_24H:A18	BRD-K55781385	BMS-927711	HT29	trt_cp	0.01 uM	24 h	2	109	0.3719	0.20359	1	0	1	1	0	Calcitonin antagonist	CALCA|CALCRL	-0.6307	1.4807	-1.6383
CPC015_ASC_24H:BRD-K37206356-001-02-1:10	BRD-K37206356	rhamnetin	ASC	trt_cp	10 uM	24 h	4	336	0.28	0.310155	0	0	1	1	0	Aldose reductase inhibitor	ALOX5	-0.6306	1.4807	-1.6382
LJP008_ASC.C_24H:D01	BRD-K02113016	olaparib	ASC	trt_cp	10 uM	24 h	2	161	0.3584	0.2429	1	1	1	1	0	PARP inhibitor	PARP1|PARP2|PARP3	-0.6304	1.4807	-1.6376
LJP007_HEPG2_24H:D19	BRD-K99964838	bosutinib	HEPG2	trt_cp	10 uM	24 h	2	283	0.6216	0.424111	0	0	1	1	0	Src inhibitor|Abl inhibitor|Bcr-Abl inhibitor	ABL1|SRC|BCR|LYN|CAMK2G|HCK|CAMK1D|CDK2|FRK|FYN|MAP2K1|MAP2K2|MAP3K2|MAP4K5|STK10|STK24|STK4|TNK2|TXK	-0.6302	1.4807	-1.6371
REP.B009_HA1E_24H:F01	BRD-A29520968	acifran	HA1E	trt_cp	2.22 uM	24 h	2	162	0.223	0.192194	1	0	1	1	0	Cholesterol inhibitor	HCAR2|HCAR3	-0.6301	1.4807	-1.6368
CPC004_HA1E_24H:BRD-K36055864-001-09-3:10	BRD-K36055864	cycloheximide	HA1E	trt_cp	10 uM	24 h	3	561	0.8	0.677418	1	1	1	1	0	Protein synthesis inhibitor	GSK3B|RPL3	-0.6301	1.4807	-1.6368
CPC017_NPC_24H:BRD-A80502530-001-01-2:10	BRD-A80502530	cinobufagin	NPC	trt_cp	10 uM	24 h	3	687	0.73	0.716095	0	0	1	1	0	Na/K-ATPase inhibitor	ATP1A1	-0.63	1.4807	-1.6367
REP.A024_HA1E_24H:D14	BRD-K74339692	tamsulosin	HA1E	trt_cp	3.33 uM	24 h	3	477	0.3689	0.424174	1	1	1	1	0	Adrenergic receptor antagonist	ADRA1A|ADRA1B|ADRA1D	-0.63	1.4807	-1.6365
CPC006_U937_6H:BRD-K12994359-001-07-7:177.6	BRD-K12994359	valdecoxib	U937	trt_cp	200 uM	6 h	2	108	0.4	0.210171	1	1	1	1	0	Cyclooxygenase inhibitor	PTGS2|CYP2C19|CA12	-0.6297	1.4807	-1.6359
REP.A004_HEK293_24H:O07	BRD-A26384407	chlortalidone	HEK293	trt_cp	10 uM	24 h	3	276	0.4577	0.359398	0	0	1	1	0	Carbonic anhydrase inhibitor	CA7|CA1|CA12|CA14|CA4|SLC12A1|SLC12A3	-0.6296	1.4807	-1.6357
REP.A027_MCF10A_24H:I12	BRD-K97181089	amiloride	MCF10A	trt_cp	0.04 uM	24 h	3	373	0.0917	0.187012	0	0	1	1	0	Sodium channel inhibitor	SCNN1A|ASIC1|ASIC2|SCNN1B|SCNN1G|AOC1|ASIC3|PKD2|PKD2L1|PLAU|SCNN1D|SLC9A1|TRPC7|TRPV2	-0.6295	1.4807	-1.6354
CPC006_HA1E_24H:J02	BRD-K02113016	olaparib	HA1E	trt_cp	40 uM	24 h	3	139	0.2557	0.190635	1	1	1	1	0	PARP inhibitor	PARP1|PARP2|PARP3	-0.6294	1.4807	-1.635
REP.B027_YAPC_24H:B18	BRD-K92657060	zaleplon	YAPC	trt_cp	0.01 uM	24 h	2	358	0.3019	0.332433	1	1	1	1	0	Benzodiazepine receptor agonist	GABRA1|AOX1|GABRB1|GABRG2|TSPO	-0.6294	1.4807	-1.6349
CPC018_HEPG2_6H:BRD-A29082194-001-02-4:10	BRD-A29082194	gitoxigenin	HEPG2	trt_cp	10 uM	6 h	3	107	0.19	0.144178	1	0	1	1	0	Na/K-ATPase inhibitor	ATP1A1	-0.6292	1.4807	-1.6346
REP.B008_YAPC_24H:I22	BRD-K75024268	lesinurad	YAPC	trt_cp	0.08 uM	24 h	2	213	0.1578	0.185385	0	0	1	1	0	Uric acid diuretic	SLC22A12	-0.6291	1.4807	-1.6343
CPC018_ASC_24H:BRD-K26429091-051-01-9:10	BRD-K26429091	J-104129	ASC	trt_cp	10 uM	24 h	3	189	0.36	0.263762	1	0	1	1	0	Acetylcholine receptor antagonist	CHRM3	-0.629	1.4807	-1.6341
MOAR005_A375_24H:E20	BRD-K13606314	P-5091	A375	trt_cp	3.33 uM	24 h	3	87	0.35	0.176451	1	1	1	1	0	Ubiquitin specific protease inhibitor	USP7	-0.629	1.4807	-1.6339
CPC002_HCC515_24H:BRD-K77641333-003-15-6:10	BRD-K77641333	naphazoline	HCC515	trt_cp	10 uM	24 h	2	156	0.34	0.23288	0	0	1	1	0	Adrenergic receptor agonist	ADRA1A|ADRA2A	-0.6289	1.4807	-1.6338
REP.A017_PC3_24H:M09	BRD-K67680372	CI-966	PC3	trt_cp	1.11 uM	24 h	3	134	0.1445	0.140707	1	0	1	1	0	GAT inhibitor	SLC6A1	-0.6289	1.4807	-1.6338
CPC016_HT29_6H:BRD-K18574842-323-03-3:10	BRD-K18574842	nafcillin	HT29	trt_cp	10 uM	6 h	5	105	0.04	0.0655323	1	0	1	1	0	Bacterial cell wall synthesis inhibitor	CYP3A4|CYP1A2|SLC22A6	-0.6288	1.4807	-1.6335
MOAR002_PC3_24H:N16	BRD-K05444225	E-7449	PC3	trt_cp	10 uM	24 h	3	277	0.45	0.357007	1	1	1	1	0	PARP inhibitor	PARP1|PARP2|TNKS|TNKS2	-0.6286	1.4807	-1.6331
LJP009_HELA_24H:C01	BRD-K83972459	JWE-035	HELA	trt_cp	10 uM	24 h	3	311	0.6064	0.439127	1	1	1	1	0	Aurora kinase inhibitor	AURKA	-0.6286	1.4807	-1.6328
REP.B014_MCF7_24H:B09	BRD-A55962179	omeprazole	MCF7	trt_cp	0.25 uM	24 h	2	225	0.3963	0.301949	1	1	1	1	0	Proton pump inhibitor	ATP4A|CYP1A2|CYP2C19|CLCN2	-0.6284	1.4807	-1.6326
CPC016_A549_24H:BRD-K88759641-003-01-0:10	BRD-K88759641	EMD-84	A549	trt_cp	10 uM	24 h	3	64	0.04	0.0511624	0	0	1	1	0	Angiotensin receptor antagonist	AGTR1	-0.6283	1.4807	-1.6322
CPC016_MCF7_6H:BRD-K62736196-015-03-7:10	BRD-K62736196	guanaben-acetate	MCF7	trt_cp	10 uM	6 h	2	50	0.1	0.0715016	0	0	1	1	0	Adrenergic receptor agonist	ADRA2A|ADRA2B|ADRA2C	-0.6282	1.4807	-1.6318
REP.A004_HEK293_24H:F18	BRD-K21396683	marimastat	HEK293	trt_cp	0.04 uM	24 h	3	184	0.3938	0.272193	0	0	1	1	0	Matrix metalloprotease inhibitor	MMP1|MMP2|MMP7|MMP10|MMP11|MMP12|MMP13|MMP14|MMP15|MMP16|MMP17|MMP19|MMP20|MMP21|MMP23A|MMP24|MMP25|MMP26|MMP27|MMP28|MMP3|MMP8|MMP9	-0.6281	1.4807	-1.6316
CPC014_A549_24H:BRD-K77175907-001-03-1:10	BRD-K77175907	calcifediol	A549	trt_cp	10 uM	24 h	3	107	0.26	0.168659	0	0	1	1	0	Vitamin D receptor agonist	VDR	-0.628	1.4807	-1.6315
CPC011_A375_6H:BRD-K47278471-003-21-4:10	BRD-K47278471	diphenhydramine	A375	trt_cp	10 uM	6 h	3	621	0.33	0.457755	0	0	1	1	0	Histamine receptor antagonist	HRH1	-0.6279	1.4807	-1.6311
REP.A005_PC3_24H:F04	BRD-K08832567	naringenin	PC3	trt_cp	0.37 uM	24 h	2	93	0.2759	0.161975	1	1	1	1	0	Aromatase inhibitor|TRPV antagonist	CYP19A1|ESR2|CYP1B1|GLO1|HSD17B1	-0.6278	1.4807	-1.631
CPC011_HT29_6H:BRD-K39391626-001-02-3:10	BRD-K39391626	ethylestrenol	HT29	trt_cp	10 uM	6 h	4	589	0.04	0.155209	0	0	1	1	0	Progesterone receptor agonist	AR	-0.6275	1.4807	-1.6302
CPC006_SW480_6H:BRD-K82818427-001-01-4:44.4	BRD-K82818427	batimastat	SW480	trt_cp	40 uM	6 h	2	74	0.05	0.061508	0	0	1	1	0	Matrix metalloprotease inhibitor	MMP1|ADAM28|ADAMTS5|MMP12|MMP16|MMP2|MMP8	-0.6274	1.4807	-1.6299
PAC001_U2OS_6H:BRD-K67511046-003-03-7:5.49699	BRD-K67511046	naloxone	U2OS	trt_cp	6.66 uM	6 h	2	145	0.11	0.127706	0	0	1	1	0	Opioid receptor antagonist	OPRM1|OPRK1|OPRD1|CREB1|ESR1|TLR4	-0.6274	1.4807	-1.6297
REP.A007_YAPC_24H:L01	BRD-K53737926	amitriptyline	YAPC	trt_cp	10 uM	24 h	3	163	0.3797	0.251562	1	1	1	1	0	Norepinephrine inhibitor|Norepinephrine reuptake inhibitor|Serotonin receptor antagonist|Serotonin reuptake inhibitor	SLC6A2|SLC6A4|CHRM1|CHRM2|CHRM3|CHRM4|CHRM5|HRH1|HTR6|CYP2C19|CYP3A5|SCN4A|ADRA1A|ADRA1B|ADRA1D|ADRA2A|ADRB1|ADRB2|ADRB3|HRH2|HRH4|HTR1A|HTR1B|HTR1D|HTR2A|HTR2C|HTR7|KCNA1|KCND2|KCND3|KCNQ2|KCNQ3|NTRK1|NTRK2|OPRD1|OPRK1|OPRM1|SIGMAR1	-0.6273	1.4807	-1.6295
CPC006_PC3_24H:F08	BRD-A36318220	necrostatin-1	PC3	trt_cp	150 uM	24 h	5	183	0.3462	0.254519	1	1	1	1	0	RIPK inhibitor	IDO1|KRR1|RIPK1	-0.6272	1.4807	-1.6294
REP.B004_HT29_24H:E20	BRD-K21450440	benzthiazide	HT29	trt_cp	0.74 uM	24 h	2	117	0.0376	0.0670683	0	0	1	1	0	Carbonic anhydrase inhibitor	CA2|SLC12A3|CA1|CA12|CA4|CA9	-0.6271	1.4807	-1.6292
REP.A022_MCF7_24H:M07	BRD-K70557564	zosuquidar	MCF7	trt_cp	10 uM	24 h	3	241	0.5741	0.376126	1	1	1	1	0	P-glycoprotein inhibitor	ABCB1|ABCB4	-0.6271	1.4807	-1.6291
REP.A021_THP1_24H:P09	BRD-K86525559	AZD-7762	THP1	trt_cp	1.11 uM	24 h	3	562	0.6428	0.607766	0	0	1	1	0	CHK inhibitor	CHEK1|CHEK2	-0.627	1.4807	-1.6287
LJP008_HEK293_24H:G19	BRD-K03406345	azacitidine	HEK293	trt_cp	10 uM	24 h	2	454	0.766	0.596311	0	0	1	1	0	DNA inhibitor	DNMT1|DNMT3A	-0.627	1.4807	-1.6287
CPC007_A375_24H:BRD-K91509126-001-16-0:10	BRD-K91509126	piceatannol	A375	trt_cp	10 uM	24 h	3	287	0.42	0.351072	1	1	1	1	0	Syk inhibitor	PTGS2|SIRT1|SYK|TYR|ATP5A1|ATP5B|ATP5C1|IRF3	-0.6269	1.4807	-1.6286
LJP006_BT20_24H:D07	BRD-K19540840	saracatinib	BT20	trt_cp	10 uM	24 h	2	117	0.585	0.264546	1	1	1	1	0	Src inhibitor	SRC|ABL1|LCK|YES1	-0.6266	1.4807	-1.6278
REP.A025_HA1E_24H:N19	BRD-K79102359	idalopirdine	HA1E	trt_cp	10 uM	24 h	3	127	0.237	0.175431	1	1	1	1	0	Serotonin receptor antagonist	HTR6	-0.6266	1.4807	-1.6277
NMH002_NEU_6H:BRD-K95785537-001-19-9:10	BRD-K95785537	PP-2	NEU	trt_cp	10 uM	6 h	2	194	0.55	0.330303	0	0	1	1	0	Src inhibitor	SRC|LCK|ABL1|LYN|RIPK2	-0.6265	1.4807	-1.6276
REP.B008_THP1_24H:G08	BRD-K73691377	alprostadil	THP1	trt_cp	0.74 uM	24 h	2	278	0.4859	0.371643	1	1	1	1	0	Prostanoid receptor agonist	PTGER1|PTGER2|CATSPER1|CATSPER2|CATSPER3|CATSPER4|PTGDR|PTGER4|PTGIR	-0.6265	1.4807	-1.6275
CPC017_A375_6H:BRD-K92758126-001-06-3:10	BRD-K92758126	MD-920	A375	trt_cp	10 uM	6 h	3	64	0.18	0.108532	0	0	1	1	0	NFKB inhibitor	AADACL2	-0.6265	1.4807	-1.6275
CPC015_ASC_24H:BRD-K00603606-003-13-3:10	BRD-K00603606	ticlopidine	ASC	trt_cp	10 uM	24 h	4	106	0.27	0.171067	0	0	1	1	0	Purinergic receptor antagonist	P2RY12|CYP2B6|CYP2C19	-0.6262	1.4807	-1.6268
PBIOA015_A375_24H:M07	BRD-K69608737	tacrolimus	A375	trt_cp	10 uM	24 h	3	124	0.17	0.146813	1	1	1	1	0	Calcineurin inhibitor	FKBP1A|CYP3A5|CYP3A7	-0.6262	1.4807	-1.6267
CPC018_PHH_24H:BRD-K19284129-001-01-8:10	BRD-K19284129	salvinorin-a	PHH	trt_cp	10 uM	24 h	3	302	0.26	0.283348	0	0	1	1	0	Opioid receptor agonist	OPRK1|OPRD1|OPRM1	-0.6261	1.4807	-1.6266
CPC017_A375_6H:BRD-K59469039-001-03-1:10	BRD-K59469039	AG-879	A375	trt_cp	10 uM	6 h	3	407	0.48	0.446939	0	0	1	1	0	Tyrosine kinase inhibitor|Angiogenesis inhibitor|VEGFR inhibitor	KDR|ERBB2|NTRK1	-0.6261	1.4807	-1.6266
REP.A026_MCF10A_24H:H17	BRD-A90547603	eptifibatide	MCF10A	trt_cp	0.125 uM	24 h	3	118	0.1008	0.110281	0	0	1	1	0	Platelet aggregation inhibitor	ITGA2B|ITGB3	-0.6259	1.4807	-1.6261
CPC012_NPC_24H:BRD-K48935217-001-01-3:10	BRD-K48935217	epothilone	NPC	trt_cp	10 uM	24 h	3	198	0.42	0.2916	0	0	1	1	0	Tubulin inhibitor	TUBB	-0.626	1.4807	-1.6261
CPC018_ASC_24H:BRD-K09602097-001-04-5:10	BRD-K09602097	forskolin	ASC	trt_cp	10 uM	24 h	3	365	0.38	0.37659	0	0	1	1	0	Adenylyl cyclase activator	ADCY2|ADCY5|GNAS	-0.6259	1.4807	-1.626
REP.A005_YAPC_24H:I01	BRD-A09472452	flecainide	YAPC	trt_cp	10 uM	24 h	3	162	0.2134	0.188012	0	0	1	1	0	Sodium channel inhibitor	SCN5A|KCNA5|KCNA7|SCN4A	-0.6259	1.4807	-1.6259
REP.A003_JURKAT_24H:A16	BRD-A31159102	fluoxetine	JURKAT	trt_cp	0.37 uM	24 h	2	57	0.5151	0.173266	0	0	1	1	0	Selective serotonin reuptake inhibitor (SSRI)	SLC6A4|CYP2C19|ANO1|HTR2B	-0.6257	1.4807	-1.6255
CPC016_A375_6H:BRD-K92492521-001-01-1:10	BRD-K92492521	LY-255283	A375	trt_cp	10 uM	6 h	4	211	0.18	0.197064	0	0	1	1	0	Leukotriene receptor antagonist	LTB4R|LTB4R2	-0.6257	1.4807	-1.6253
REP.A024_A375_24H:P17	BRD-K79602928	metformin	A375	trt_cp	0.125 uM	24 h	2	100	0.0834	0.092345	1	1	1	1	0	Insulin sensitizer	INS|ACACB|PRKAB1	-0.6256	1.4807	-1.6252
CPC001_PC3_24H:L06	BRD-K05151076	ZK-164015	PC3	trt_cp	10 uM	24 h	5	490	0.5899	0.543648	1	1	1	1	0	Estrogen receptor antagonist	ESR1|ESR2	-0.6256	1.4807	-1.6251
LIVB002_HUH7_72H:N08	BRD-K93754473	tamoxifen	HUH7	trt_cp	8 uM	72 h	3	228	0.37	0.293697	0	0	1	1	0	Estrogen receptor antagonist|Selective estrogen receptor modulator (SERM)	ESR1|ESR2|CYP3A5|ESRRG|PLD1|PRKCD|PRKCE|PRKCQ|PRKCZ|EBP|GPER1|PRKCA|PRKCB|PRKCG|PRKCI	-0.6255	1.4807	-1.625
CPC002_HCC515_6H:BRD-K50018155-003-01-3:10	BRD-K50018155	RS-67506	HCC515	trt_cp	10 uM	6 h	3	238	0.19	0.215028	1	0	1	1	0	Serotonin receptor agonist	HTR4	-0.6255	1.4807	-1.625
REP.A017_A375_24H:B19	BRD-A50998626	palomid-529	A375	trt_cp	10 uM	24 h	3	151	0.2673	0.203151	1	1	1	1	0	AKT inhibitor|FGFR inhibitor|MTOR inhibitor|VEGFR inhibitor	MTOR|FGF2	-0.6255	1.4807	-1.6249
PAC002_U2OS_6H:BRD-K56558538-003-02-8:4.82435	BRD-K56558538	ambroxol	U2OS	trt_cp	4 uM	6 h	2	75	0.11	0.0918454	0	0	1	1	0	Sodium channel inhibitor	GBA|CYP3A4	-0.6255	1.4807	-1.6248
CPC006_PC3_24H:C02	BRD-K59184148	SB-216763	PC3	trt_cp	10 uM	24 h	5	230	0.3546	0.288778	1	1	1	1	0	GSK inhibitor	GSK3B|CCNA2|CDK2|GSK3A	-0.6254	1.4807	-1.6246
AICHI001_HBL1_4H:D10	BRD-K63923597	barasertib-HQPA	HBL1	trt_cp	0.125 uM	4 h	2	31	0.09	0.0534112	0	0	1	1	0	Aurora kinase inhibitor	AURKB|AURKC|AURKA	-0.6253	1.4807	-1.6245
REP.A011_MDAMB231_24H:G01	BRD-K05524748	dronedarone	MDAMB231	trt_cp	10 uM	24 h	3	302	0.4339	0.36604	0	0	1	1	0	Adrenergic receptor antagonist	SLC22A2|SLC22A8|SLCO1B3|ADRA1A|ADRA1B|ADRA1D|ADRA2A|ADRA2B|ADRA2C|ADRB1|CACNA1C|CACNA1D|CACNA1F|CACNA1S|CACNB1|CACNB2|CACNB3|CACNB4|KCNA5|KCNH2|KCNK2|SCN1A	-0.6253	1.4807	-1.6243
PBIOA019_HEPG2_24H:K19	BRD-K17702546	PD-168393	HEPG2	trt_cp	10 uM	24 h	3	303	0.44	0.369214	1	1	1	1	0	EGFR inhibitor	EGFR|ERBB2|SRC	-0.6252	1.4807	-1.6242
CPC016_A549_24H:BRD-K91699951-001-03-7:10	BRD-K91699951	benzonatate	A549	trt_cp	10 uM	24 h	3	235	0.25	0.245095	0	0	1	1	0	Anesthetic - local	SCN5A	-0.6251	1.4807	-1.6239
LJP005_MCF7_3H:F03	BRD-K79090631	CGP-60474	MCF7	trt_cp	1.11 uM	3 h	2	258	0.6256	0.406246	1	1	1	1	0	CDK inhibitor	CDK1|CDK2	-0.6248	1.4807	-1.623
REP.A012_MDAMB231_24H:M09	BRD-A02990301	lofexidine	MDAMB231	trt_cp	1.11 uM	24 h	2	102	0.17	0.133154	0	0	1	1	0	Adrenergic receptor agonist	ADRA2A	-0.6248	1.4807	-1.623
CPC014_HCC515_6H:BRD-K18135438-001-08-4:10	BRD-K18135438	BRD-K18135438	HCC515	trt_cp	10 uM	6 h	3	61	0.13	0.0900466	1	0	1	1	0	11-beta-HSD1 inhibitor|FXR agonist	HSD11B1|NR1H4	-0.6247	1.4807	-1.6229
REP.B012_A375_24H:P03	BRD-A03216249	mepivacaine	A375	trt_cp	0.25 uM	24 h	2	145	0.2847	0.205451	0	0	1	1	0	Potassium channel antagonist|Sodium channel inhibitor	SCN9A|SCN10A	-0.6247	1.4807	-1.6228
EMU001_BJAB_24H:N19	BRD-K62391742	GDC-0199	BJAB	trt_cp	10 uM	24 h	2	711	0.8342	0.778754	0	0	1	1	0	BCL inhibitor	BCL2	-0.6246	1.4807	-1.6226
REP.A018_YAPC_24H:O20	BRD-A67479912	progesterone	YAPC	trt_cp	3.33 uM	24 h	2	61	0.3068	0.138332	0	0	1	1	0	Progesterone receptor agonist	PGR|CYP17A1|NR3C2|CYP2C19|CATSPER1|CATSPER2|CATSPER3|CATSPER4|ESR1|OPRK1|TRPC5	-0.6245	1.4807	-1.6223
REP.A013_YAPC_24H:B07	BRD-K37355418	efaproxiral	YAPC	trt_cp	10 uM	24 h	3	73	0.1366	0.100976	1	0	1	1	0	Haemoglobin oxygen release stimulant	HBA1|HBB	-0.6243	1.4807	-1.6219
CPC006_THP1_6H:N01	BRD-A71390734	idarubicin	THP1	trt_cp	0.08 uM	6 h	2	614	0.0785	0.221998	1	0	1	1	0	Topoisomerase inhibitor	TOP2A	-0.6241	1.4807	-1.6213
CPC018_ASC_24H:BRD-K34608650-001-01-6:10	BRD-K34608650	GP-2a	ASC	trt_cp	10 uM	24 h	3	87	0.16	0.119303	1	1	1	1	0	Cannabinoid receptor agonist	CNR2	-0.6238	1.4807	-1.6206
TAA001_SHSY5Y_24H:G13	BRD-K21680192	mitoxantrone	SHSY5Y	trt_cp	10 uM	24 h	3	829	0.79	0.818317	0	0	1	1	0	Topoisomerase inhibitor	TOP2A|PIM1	-0.6238	1.4807	-1.6206
CPC015_HT29_6H:BRD-K84658672-001-03-0:10	BRD-K84658672	nateglinide	HT29	trt_cp	10 uM	6 h	3	125	0.26	0.182294	1	0	1	1	0	Insulin secretagogue	ABCC8|KCNJ11|CYP3A4|INS|KCNJ10|PPARG	-0.6237	1.4807	-1.6204
CPC006_MCF7_24H:C13	BRD-A62182663	YK-4279	MCF7	trt_cp	10 uM	24 h	5	513	0.527	0.525768	0	0	1	1	0	Apoptosis stimulant|ETV1 inhibitor	EWSR1|FLI1|DHX9	-0.6237	1.4807	-1.6202
CPC006_U937_6H:BRD-K34581968-001-01-2:11.1	BRD-K34581968	BMS-536924	U937	trt_cp	12 uM	6 h	2	205	0.48	0.317196	1	1	1	1	0	IGF-1 inhibitor	IGF1R|INSR|AKT1|CCNE1|CDK2|CYP3A4|ERBB2|KDR|LCK|MAPK1|MET|PDGFRA|PDGFRB	-0.6236	1.4807	-1.62
LJP007_HEPG2_24H:E24	BRD-K13662825	dinaciclib	HEPG2	trt_cp	0.04 uM	24 h	2	438	0.7209	0.568205	0	0	1	1	0	CDK inhibitor	CDK1|CDK2|CDK9|CDK5|CCNT1	-0.6236	1.4807	-1.6199
REP.A003_PC3_24H:N15	BRD-K35687421	gimeracil	PC3	trt_cp	1.11 uM	24 h	3	154	0.3471	0.233786	1	1	1	1	0	Dihydropyrimidine dehydrogenase inhibitor	DPYD	-0.6236	1.4807	-1.6199
CPC018_ASC_24H:BRD-A02006392-001-09-9:10	BRD-A02006392	nitrendipine	ASC	trt_cp	10 uM	24 h	3	63	0.15	0.0982984	1	0	1	1	0	Calcium channel blocker	CACNA1C|CACNA1D|CACNA2D1|CACNA1H|CACNA1S|CACNA2D2|CACNB2|CACNG1|KCNN4	-0.6235	1.4807	-1.6198
CPC004_HCC515_24H:BRD-K20482099-001-01-1:10	BRD-K20482099	rutin	HCC515	trt_cp	10 uM	24 h	3	265	0.1	0.164609	1	0	1	1	0	Antioxidant|Capillary stabilizing agent|Nitric oxide scavenger	AKR1C3|AKR1B1	-0.6235	1.4807	-1.6197
REP.B026_PC3_24H:L07	BRD-K91825936	ZK-811752	PC3	trt_cp	2.22 uM	24 h	2	196	0.4134	0.287835	1	1	1	1	0	CC chemokine receptor antagonist	CCR1	-0.6235	1.4807	-1.6197
REP.A022_HELA_24H:N01	BRD-A69815203	cyclosporin-a	HELA	trt_cp	10 uM	24 h	2	397	0.6446	0.51153	1	1	1	1	0	Calcineurin inhibitor	PPIA|PPP3CA	-0.6234	1.4807	-1.6195
CPC015_ASC_24H:BRD-A23683907-334-01-0:10	BRD-A23683907	NAS-181	ASC	trt_cp	10 uM	24 h	4	84	0.16	0.117228	0	0	1	1	0	Serotonin receptor antagonist	HTR1B	-0.6234	1.4807	-1.6193
CPC006_A549_6H:BRD-K26664453-001-03-4:10	BRD-K26664453	BRD-K26664453	A549	trt_cp	10 uM	6 h	4	252	0.52	0.366043	1	1	1	1	0	Tubulin inhibitor	ACTB	-0.6233	1.4807	-1.6192
CPC004_PC3_24H:BRD-A49160188-003-04-4:10	BRD-A49160188	donepezil	PC3	trt_cp	10 uM	24 h	5	101	0.34	0.187383	0	0	1	1	0	Acetylcholinesterase inhibitor	ACHE|HTR2A	-0.6232	1.4807	-1.619
REP.A018_PC3_24H:D01	BRD-K62562723	SR-2640	PC3	trt_cp	10 uM	24 h	3	439	0.6242	0.529328	0	0	1	1	0	Leukotriene receptor antagonist	CYSLTR1	-0.6232	1.4807	-1.619
CPC017_NPC_24H:BRD-K23478508-001-03-7:10	BRD-K23478508	digoxin	NPC	trt_cp	10 uM	24 h	4	682	0.77	0.732771	0	0	1	1	0	Na/K-ATPase inhibitor	ATP1A1|ABCB1|RORC|SLCO1B3	-0.6232	1.4807	-1.6189
CPC009_HCC515_6H:BRD-K83010055-001-01-6:10	BRD-K83010055	VU-0415374-1	HCC515	trt_cp	10 uM	6 h	3	96	0.17	0.129179	1	0	1	1	0	Glutamate receptor antagonist	GRM4	-0.6231	1.4807	-1.6188
MOAR007_PC3_24H:A10	BRD-K40758068	efavirenz	PC3	trt_cp	10 uM	24 h	3	124	0.27	0.185022	1	1	1	1	0	HIV inhibitor	CYP2B6|CYP2C19|CYP3A4|CYP2C8|CYP3A5|CYP1A2|CYP2C9|CYP2D6	-0.623	1.4807	-1.6185
CPC011_HT29_6H:BRD-K81855038-003-08-9:10	BRD-K81855038	roxatidine	HT29	trt_cp	10 uM	6 h	4	558	0.25	0.377675	0	0	1	1	0	Histamine receptor antagonist	HRH2	-0.623	1.4807	-1.6183
CPC006_NOMO1_6H:BRD-K15563106-001-08-1:177.6	BRD-K15563106	phloretin	NOMO1	trt_cp	200 uM	6 h	2	146	0.16	0.154549	1	0	1	1	0	Sodium channel inhibitor	AQP9|CLCN3|SLC23A1	-0.623	1.4807	-1.6183
LJP007_SKL.C_24H:B04	BRD-K21680192	mitoxantrone	SKL	trt_cp	10 uM	24 h	3	389	0.5886	0.483855	1	1	1	1	0	Topoisomerase inhibitor	TOP2A|PIM1	-0.6229	1.4807	-1.6182
CPC016_ASC_24H:BRD-K33396764-001-02-0:10	BRD-K33396764	BRD-K33396764	ASC	trt_cp	10 uM	24 h	3	276	0.21	0.243442	0	0	1	1	0	Omega 3 fatty acid stimulant	ELOVL4|FADS1|FADS2|FFAR1|FFAR4|PTGS2|SLC8A1|TRPV1	-0.6228	1.4807	-1.618
CVD001_HUH7_6H:BRD-K85985071-001-16-5:2.5	BRD-K85985071	ellipticine	HUH7	trt_cp	2.5 uM	6 h	3	222	0.34	0.277809	0	0	1	1	0	Topoisomerase inhibitor	TOP2A|TOP2B	-0.6227	1.4807	-1.6177
REP.B024_MDAMB231_24H:I01	BRD-A76747559	rutin	MDAMB231	trt_cp	2.22 uM	24 h	2	301	0.5328	0.404945	0	0	1	1	0	Antioxidant|Capillary stabilizing agent|Nitric oxide scavenger	AKR1C3|AKR1B1	-0.6226	1.4807	-1.6174
CPD001_PC3_24H:BRD-K54264597-237-01-9:10	BRD-K54264597	BRD-K54264597	PC3	trt_cp	10 uM	24 h	3	65	0.05	0.0576464	1	0	1	1	0	Mineralocorticoid receptor antagonist	NR3C2	-0.6226	1.4807	-1.6173
CPC015_PHH_24H:BRD-A29426959-050-07-4:10	BRD-A29426959	carbinoxamine	PHH	trt_cp	10 uM	24 h	2	101	0.27	0.166983	0	0	1	1	0	Histamine receptor antagonist|Calcium channel blocker	HRH1	-0.6224	1.4807	-1.6169
CPC017_SKB_24H:BRD-K15791587-003-01-7:10	BRD-K15791587	L-733060	SKB	trt_cp	10 uM	24 h	2	59	0.06	0.0601634	0	0	1	1	0	Tachykinin antagonist	TACR1	-0.6223	1.4807	-1.6167
CPC015_A549_24H:BRD-K73589491-001-05-4:10	BRD-K73589491	nizatidine	A549	trt_cp	10 uM	24 h	3	159	0.18	0.171067	0	0	1	1	0	Histamine receptor antagonist	HRH2	-0.6223	1.4807	-1.6165
CPC009_HCC515_6H:BRD-A22256192-001-14-8:10	BRD-A22256192	terazosin	HCC515	trt_cp	10 uM	6 h	3	489	0.38	0.43589	0	0	1	1	0	Adrenergic receptor antagonist	ADRA1D|ADRA1A|ADRA1B|KCNH2|KCNH6|KCNH7	-0.6221	1.4807	-1.6162
CPC001_HCC515_6H:BRD-A64227845-004-02-8:10	BRD-A64227845	SKF-77434	HCC515	trt_cp	10 uM	6 h	2	146	0.2	0.172791	1	1	1	1	0	Dopamine receptor agonist	DRD1	-0.622	1.4807	-1.6159
REP.B008_MDAMB231_24H:M21	BRD-K88807631	elacridar	MDAMB231	trt_cp	0.25 uM	24 h	2	141	0.2018	0.170569	1	0	1	1	0	P-glycoprotein inhibitor	ABCB1	-0.6216	1.4807	-1.6147
CPC011_A375_6H:BRD-A00520476-001-05-8:10	BRD-A00520476	otenzepad	A375	trt_cp	10 uM	6 h	3	652	0.38	0.503322	0	0	1	1	0	Acetylcholine receptor antagonist	CHRM2|CHRM1|CHRM3|CHRM4|CHRM5	-0.6216	1.4807	-1.6147
CPC013_ASC_24H:BRD-K63068307-001-01-4:10	BRD-K63068307	ZSTK-474	ASC	trt_cp	10 uM	24 h	4	467	0.58	0.526263	0	0	1	1	0	PI3K inhibitor	PIK3CG|PIK3CA|PIK3CB|PIK3CD	-0.6215	1.4807	-1.6146
CPC006_HCT116_6H:BRD-K02113016-001-01-4:44.4	BRD-K02113016	olaparib	HCT116	trt_cp	40 uM	6 h	2	32	0.23	0.08675	1	0	1	1	0	PARP inhibitor	PARP1|PARP2|PARP3	-0.6213	1.4805	-1.6141
REP.A019_JURKAT_24H:P03	BRD-K50398167	meclofenamic-acid	JURKAT	trt_cp	1.11 uM	24 h	3	498	0.2092	0.326382	0	0	1	1	0	Cyclooxygenase inhibitor|Prostanoid receptor antagonist	PTGS1|PTGS2|ALOX5|CNR1|KCNQ2|KCNQ3	-0.6212	1.4804	-1.6138
REP.A012_MDAMB231_24H:B08	BRD-A00147595	balaglitazone	MDAMB231	trt_cp	3.33 uM	24 h	2	85	0.1413	0.110818	0	0	1	1	0	Insulin sensitizer|PPAR receptor agonist	PPARG|INS	-0.6212	1.4803	-1.6137
CPC016_NEU_24H:BRD-K82731415-001-05-4:10	BRD-K82731415	olomoucine	NEU	trt_cp	10 uM	24 h	2	238	0.34	0.287646	0	0	1	1	0	CDK inhibitor	CDK1|CDK2|CDK5|MAPK1	-0.6212	1.4803	-1.6137
CPC014_SKB_24H:BRD-K99545815-001-01-4:10	BRD-K99545815	PF-562271	SKB	trt_cp	10 uM	24 h	4	587	0.58	0.590016	0	0	1	1	0	Focal adhesion kinase inhibitor	PTK2|PTK2B	-0.6212	1.4803	-1.6137
CPC016_NPC_24H:BRD-K82484965-003-02-7:10	BRD-K82484965	carmoxirole	NPC	trt_cp	10 uM	24 h	3	202	0.08	0.128544	0	0	1	1	0	Dopamine receptor agonist	DRD2	-0.6211	1.4802	-1.6134
REP.B008_A375_24H:B19	BRD-K36269323	asymmetrical-dimethylarginine	A375	trt_cp	2.22 uM	24 h	2	66	0.1655	0.105682	1	1	1	1	0	Nitric oxide synthase inhibitor	NOS2|NOS3	-0.6209	1.48	-1.6131
REP.A028_MCF10A_24H:O07	BRD-K97428065	netupitant	MCF10A	trt_cp	10 uM	24 h	2	125	0.2916	0.193054	0	0	1	1	0	Tachykinin antagonist	TACR1	-0.621	1.4801	-1.6131
REP.B028_HA1E_24H:C01	BRD-K92758126	MD-920	HA1E	trt_cp	1.25 uM	24 h	2	136	0.2807	0.19757	1	1	1	1	0	NFKB inhibitor	AADACL2	-0.621	1.4801	-1.6131
REP.B016_HELA_24H:F17	BRD-K52662033	lidocaine	HELA	trt_cp	0.03 uM	24 h	2	741	0.2358	0.42268	0	0	1	1	0	Histamine receptor agonist	SCN5A|SCN10A|SCN9A|EGFR|SCN11A|SCN1A|SCN2A|SCN3A|SCN4A|SCN7A|SCN8A	-0.6209	1.4799	-1.6129
REP.B018_HT29_24H:F19	BRD-K63504947	semaxanib	HT29	trt_cp	2.22 uM	24 h	2	108	0.3476	0.195922	1	1	1	1	0	VEGFR inhibitor	KDR|FLT1|KIT|PDGFRB|FLT3|MET|FGFR1|PDGFRA|RET	-0.6209	1.4799	-1.6129
REP.B024_A549_24H:N15	BRD-K78659596	ixazomib	A549	trt_cp	0.25 uM	24 h	2	331	0.4875	0.406192	1	1	1	1	0	Proteasome inhibitor	PSMB1	-0.6209	1.4799	-1.6129
REP.B012_PC3_24H:H01	BRD-K01621533	acarbose	PC3	trt_cp	2.22 uM	24 h	2	430	0.6748	0.544694	0	0	1	1	0	Glucosidase inhibitor	GAA|MGAM|AMY2A|SI	-0.6208	1.4799	-1.6128
REP.B021_A375_24H:J11	BRD-K83837640	JNJ-26481585	A375	trt_cp	0.03 uM	24 h	2	386	0.5967	0.485291	1	1	1	1	0	HDAC inhibitor	HDAC1|HDAC10|HDAC11|HDAC2|HDAC3|HDAC4|HDAC5|HDAC6|HDAC7|HDAC8|HDAC9|MDM2	-0.6208	1.4799	-1.6128
CPC016_HEPG2_6H:BRD-K69600043-328-03-0:10	BRD-K69600043	thiethylperazine	HEPG2	trt_cp	10 uM	6 h	3	371	0.45	0.413165	0	0	1	1	0	Dopamine receptor antagonist	DRD1|DRD2|DRD4	-0.6208	1.4797	-1.6127
CPC011_A375_6H:BRD-K28849549-001-09-2:10	BRD-K28849549	mesalazine	A375	trt_cp	10 uM	6 h	3	562	0.45	0.508516	0	0	1	1	0	Cyclooxygenase inhibitor|Lipoxygenase inhibitor|Prostanoid receptor antagonist	PTGS1|PTGS2|PPARG|ALOX5|CTNNB1|NAT1|CHUK|IKBKB|MPO	-0.6208	1.4797	-1.6126
REP.B008_MDAMB231_24H:H23	BRD-K80535353	enoxolone	MDAMB231	trt_cp	0.03 uM	24 h	2	72	0.2476	0.135012	1	1	1	1	0	Gap junction modulator	HSD11B1|HSD11B2|HSD17B3	-0.6206	1.4793	-1.6123
REP.A003_HT29_24H:B13	BRD-K31309378	lucitanib	HT29	trt_cp	10 uM	24 h	3	220	0.3375	0.275536	0	0	1	1	0	FGFR inhibitor|VEGFR inhibitor	FGFR1|FLT1|KDR|FGFR2|FLT4|CSF1R|KIT|PDGFRA|PDGFRB|RET	-0.6206	1.4791	-1.6121
REP.A003_JURKAT_24H:F23	BRD-K32821942	azathioprine	JURKAT	trt_cp	0.125 uM	24 h	2	71	0.2808	0.142777	0	0	1	1	0	Dehydrogenase inhibitor	PPAT|HPRT1|IMPDH1	-0.6205	1.479	-1.612
CPC014_A375_6H:E17	BRD-A45498368	WYE-125132	A375	trt_cp	10 uM	6 h	2	211	0.5394	0.341136	1	1	1	1	0	MTOR inhibitor	MTOR|PIK3CA	-0.6204	1.4789	-1.6118
CPC014_NPC_24H:BRD-K50140147-001-02-8:10	BRD-K50140147	NVP-TAE684	NPC	trt_cp	10 uM	24 h	2	479	0.54	0.514275	0	0	1	1	0	ALK inhibitor	ALK|INSR	-0.6203	1.4788	-1.6115
CPC011_A375_6H:BRD-K49668410-001-13-9:10	BRD-K49668410	BRD-K49668410	A375	trt_cp	10 uM	6 h	3	480	0.34	0.408499	1	0	1	1	0	Bacterial 50S ribosomal subunit inhibitor	CYP3A4|CYP2C19|CYP3A5|CYP3A7	-0.6201	1.4776	-1.6108
REP.A024_PC3_24H:P17	BRD-K79602928	metformin	PC3	trt_cp	0.125 uM	24 h	3	199	0.4084	0.28827	1	1	1	1	0	Insulin sensitizer	INS|ACACB|PRKAB1	-0.6201	1.4777	-1.6108
CPC020_PC3_24H:BRD-A67605442-001-01-7:10	BRD-A67605442	tetrahydrobiopterin	PC3	trt_cp	10 uM	24 h	5	733	0.6	0.670592	0	0	1	1	0	Nitric oxide stimulant|Nitric oxide synthase stimulant|Phenylalanine 4-hydroxylase stimulant	PAH|TH	-0.62	1.4775	-1.6107
AICHI002_KMS34_24H:G01	BRD-K43002773	GDC-0068	KMS34	trt_cp	10 uM	24 h	3	653	0.79	0.726274	1	1	1	1	0	AKT inhibitor	AKT1|AKT2|AKT3|CYP3A5|PRKG1	-0.62	1.4775	-1.6107
CPC015_SKB_24H:BRD-K26801045-001-01-1:10	BRD-K26801045	pipamperone	SKB	trt_cp	10 uM	24 h	2	257	0.06	0.125566	0	0	1	1	0	Dopamine receptor antagonist	DRD2|HTR2A|HRH1|HTR1A|HTR1B|HTR1D	-0.6199	1.4772	-1.6105
CPC004_VCAP_6H:BRD-K65639003-001-05-8:10	BRD-K65639003	icariin	VCAP	trt_cp	10 uM	6 h	4	101	0.1	0.101623	1	0	1	1	0	Phosphodiesterase inhibitor	NMUR2|SORD|PDE5A	-0.6199	1.477	-1.6104
CPC002_HCC515_6H:BRD-K59256312-066-04-1:10	BRD-K59256312	gabexate	HCC515	trt_cp	10 uM	6 h	3	548	0.11	0.248266	1	0	1	1	0	Serine protease inhibitor	PRSS1|TPSAB1	-0.6199	1.4771	-1.6104
REP.A006_YAPC_24H:N08	BRD-A23067620	itraconazole	YAPC	trt_cp	3.33 uM	24 h	3	139	0.2568	0.191045	1	1	1	1	0	Cytochrome P450 inhibitor	CYP3A5|CYP3A7|KDR|CYP51A1	-0.6198	1.4764	-1.6101
CPC017_ASC_24H:BRD-K99107520-001-09-2:10	BRD-K99107520	felbamate	ASC	trt_cp	10 uM	24 h	4	112	0.2	0.15134	1	0	1	1	0	Glutamate receptor antagonist	GRIN2A|GRIN2B|GRIN3A|GRIN1|GRIN2C|GRIN2D|GRIN3B	-0.6198	1.4761	-1.61
GMB001_HL60_2H:BRD-A13084692:10	BRD-A13084692	troglitazone	HL60	trt_cp	10 uM	2 h	6	306	0.25	0.27968	0	0	1	1	0	PPAR receptor agonist|Insulin sensitizer	PPARG|AKR1B1|CCL2|CYP3A4|INS|ACSL4|ESRRA|ESRRG|SERPINE1|SLC29A1|TRPM3	-0.6197	1.4758	-1.6099
REP.B016_MCF10A_24H:B16	BRD-K51263939	sarcosine	MCF10A	trt_cp	0.08 uM	24 h	2	51	0.1294	0.0821453	1	1	1	1	0	GlyT-1 inhibitor	SLC6A9	-0.6195	1.4736	-1.6094
CPC003_HCC515_24H:BRD-K35629949-001-01-2:10	BRD-K35629949	SR-27897	HCC515	trt_cp	10 uM	24 h	3	103	0.24	0.158985	1	1	1	1	0	CCK receptor antagonist	CCKAR	-0.6195	1.4734	-1.6093
CPC016_NEU_24H:BRD-K87991767-001-02-0:10	BRD-K87991767	umbelliferone	NEU	trt_cp	10 uM	24 h	3	126	0.28	0.189931	0	0	1	1	0	Cyclooxygenase inhibitor	CA9	-0.6194	1.4719	-1.6091
CPD002_MCF7_6H:BRD-K21565985-001-18-3:10	BRD-K21565985	xylazine	MCF7	trt_cp	10 uM	6 h	3	220	0.24	0.232353	0	0	1	1	0	Adrenergic receptor agonist	ADRA2A|ADRA2B|ADRA2C	-0.6194	1.4719	-1.6091
CPC015_ASC_24H:BRD-A58048407-001-09-7:10	BRD-A58048407	nimodipine	ASC	trt_cp	10 uM	24 h	4	212	0.25	0.232792	0	0	1	1	0	Calcium channel blocker	CACNA1C|NR3C2|CACNA1D|CACNA1F|CACNA1S|AHR|CACNB1|CACNB2|CACNB3|CACNB4|CFTR	-0.6193	1.4708	-1.6089
REP.A014_PC3_24H:O07	BRD-K40797222	SC-12267	PC3	trt_cp	10 uM	24 h	3	449	0.6492	0.545938	1	1	1	1	0	Dihydroorotate dehydrogenase inhibitor	DHODH|IL17A|IFNG	-0.6193	1.4709	-1.6089
CPC016_A549_24H:BRD-K91290917-336-03-8:10	BRD-K91290917	amodiaquine	A549	trt_cp	10 uM	24 h	2	501	0.62	0.563567	0	0	1	1	0	Histamine receptor agonist	HNMT|CYP2C8	-0.6193	1.4695	-1.6087
REP.B028_PC3_24H:P16	BRD-K97472745	gestrinone	PC3	trt_cp	0.08 uM	24 h	2	63	0.242	0.124856	1	1	1	1	0	Progesterone receptor antagonist	PGR|AR|ESR1	-0.6189	1.4634	-1.6079
CPC018_ASC_24H:BRD-K83597974-003-15-6:10	BRD-K83597974	pargyline	ASC	trt_cp	10 uM	24 h	3	137	0.05	0.0836904	1	0	1	1	0	Monoamine oxidase inhibitor	MAOB|MAOA	-0.6189	1.4633	-1.6078
REP.A028_HELA_24H:A07	BRD-K92428153	mycophenolate-mofetil	HELA	trt_cp	10 uM	24 h	3	356	0.6532	0.487617	1	1	1	1	0	Inosine monophosphate dehydrogenase inhibitor|Dehydrogenase inhibitor|Hydroxycarboxylic acid receptor agonist|Immunosuppressant|Inositol monophosphatase inhibitor	IMPDH1|IMPDH2|HCAR2	-0.6188	1.4611	-1.6075
REP.B028_PC3_24H:M19	BRD-K97010173	deferasirox	PC3	trt_cp	2.22 uM	24 h	2	175	0.2465	0.210019	1	1	1	1	0	Chelating agent	CYP2C19|CYP2C8|CYP3A4	-0.6187	1.46	-1.6073
CPC015_ASC_24H:BRD-K42500029-001-01-9:10	BRD-K42500029	CGP-57380	ASC	trt_cp	10 uM	24 h	4	189	0.14	0.164485	0	0	1	1	0	MAP kinase inhibitor	MKNK1|AURKB|LCK|MKNK2|SGK1	-0.6187	1.4604	-1.6073
REP.A022_MCF7_24H:P12	BRD-A82035391	tolvaptan	MCF7	trt_cp	0.04 uM	24 h	3	183	0.4469	0.289175	1	1	1	1	0	Vasopressin receptor antagonist	AVPR2|AVPR1A	-0.6186	1.4591	-1.6071
CPC004_A375_6H:BRD-A29426959-050-07-4:10	BRD-A29426959	carbinoxamine	A375	trt_cp	10 uM	6 h	3	594	0.39	0.486694	1	0	1	1	0	Histamine receptor antagonist|Calcium channel blocker	HRH1	-0.6186	1.4583	-1.607
CPC018_SKB_24H:BRD-K73109821-001-10-2:10	BRD-K73109821	diazoxide	SKB	trt_cp	10 uM	24 h	3	285	0.44	0.358079	0	0	1	1	0	Potassium channel activator	KCNJ11|ATP1A1|CA1|CA2|KCNJ8|KCNMA1|SLC12A3	-0.6186	1.4577	-1.6069
CPC016_ASC_24H:BRD-K81729199-001-01-0:10	BRD-K81729199	AQ-RA741	ASC	trt_cp	10 uM	24 h	3	122	0.3	0.193451	1	0	1	1	0	Acetylcholine receptor antagonist	CHRM2	-0.6184	1.4557	-1.6066
AICHI002_NALM6_24H:G01	BRD-K43002773	GDC-0068	NALM6	trt_cp	10 uM	24 h	2	814	0.81	0.82108	0	0	1	1	0	AKT inhibitor	AKT1|AKT2|AKT3|CYP3A5|PRKG1	-0.6184	1.4558	-1.6066
CPC015_ASC_24H:BRD-A73368467-003-07-7:10	BRD-A73368467	fexofenadine	ASC	trt_cp	10 uM	24 h	4	104	0.04	0.0652195	0	0	1	1	0	Histamine receptor antagonist	HRH1	-0.6185	1.456	-1.6066
MOAR001_PC3_24H:B24	BRD-A88369366	trelagliptin	PC3	trt_cp	1.11 uM	24 h	3	169	0.33	0.238798	1	1	1	1	0	Dipeptidyl peptidase inhibitor	DPP4	-0.6183	1.4532	-1.6062
REP.B004_PC3_24H:P13	BRD-K27182532	metatinib	PC3	trt_cp	2.22 uM	24 h	3	145	0.3952	0.24206	1	1	1	1	0	Bcr-Abl inhibitor	KDR|MET|ABL1|BCR	-0.6182	1.4514	-1.6059
CPC006_THP1_6H:D06	BRD-K21672174	Ro-28-1675	THP1	trt_cp	150 uM	6 h	2	697	0.1655	0.343436	0	0	1	1	0	Glucokinase activator	GCK	-0.6182	1.4518	-1.6059
REP.A016_JURKAT_24H:E02	BRD-K52233191	R-547	JURKAT	trt_cp	3.33 uM	24 h	2	614	0.6388	0.633282	0	0	1	1	0	CDK inhibitor	CDK2|CDK1|CDK4|CCND1|CCNE1|CDK7	-0.6181	1.4507	-1.6058
PBIOA014_A549_24H:H01	BRD-K52836380	AZD-7545	A549	trt_cp	12 uM	24 h	3	214	0.33	0.268717	1	1	1	1	0	Pyruvate dehydrogenase kinase inhibitor	PDK2|PDK1	-0.618	1.449	-1.6054
REP.A028_MCF10A_24H:M19	BRD-K97010173	deferasirox	MCF10A	trt_cp	10 uM	24 h	2	406	0.5644	0.484047	1	1	1	1	0	Chelating agent	CYP2C19|CYP2C8|CYP3A4	-0.6179	1.4483	-1.6051
CPC006_U937_6H:BRD-K73261812-001-01-1:10	BRD-K73261812	BRD-K73261812	U937	trt_cp	10 uM	6 h	2	146	0.51	0.275926	1	1	1	1	0	Beta catenin inhibitor	CTNNB1	-0.6177	1.4483	-1.6047
REP.A020_PC3_24H:K13	BRD-K46018455	bezafibrate	PC3	trt_cp	10 uM	24 h	3	142	0.2787	0.201161	1	1	1	1	0	PPAR receptor agonist	PPARA|PPARD|PPARG|HSD11B1|LPL	-0.6175	1.4483	-1.6043
CPC004_HCC515_24H:BRD-K30020243-051-01-7:10	BRD-K30020243	aliskiren	HCC515	trt_cp	10 uM	24 h	3	74	0.18	0.116703	1	0	1	1	0	Antihypertensive|Peptidase inhibitor|Protease inhibitor|Renin inhibitor	REN	-0.6174	1.4481	-1.6039
CPC017_ASC_24H:BRD-K68392338-003-01-2:10	BRD-K68392338	ZK-93426	ASC	trt_cp	10 uM	24 h	4	73	0.16	0.109283	1	0	1	1	0	Benzodiazepine receptor antagonist	GABRA1|GABRA2|GABRA3|GABRA5	-0.6174	1.448	-1.6038
CPC015_A549_6H:BRD-A15415227-003-01-1:10	BRD-A15415227	GW-1929	A549	trt_cp	10 uM	6 h	2	146	0.3	0.211625	0	0	1	1	0	PPAR receptor agonist|Insulin sensitizer	PPARG|INS	-0.6174	1.448	-1.6037
REP.B028_MCF7_24H:D01	BRD-A92826379	lupanine	MCF7	trt_cp	2.22 uM	24 h	2	110	0.4069	0.21393	1	1	1	1	0	Sodium channel inhibitor	INS	-0.6173	1.4477	-1.6036
CPC016_SKB_24H:BRD-K10042277-001-04-3:10	BRD-K10042277	desmethylclozapine	SKB	trt_cp	10 uM	24 h	3	417	0.65	0.526448	1	0	1	1	0	Acetylcholine receptor agonist	CHRM1|DRD2|DRD3|HTR2A|HTR2C	-0.6173	1.4475	-1.6035
CVD001_HUH7_6H:BRD-K60237333-001-15-6:10	BRD-K60237333	niacin	HUH7	trt_cp	10 uM	6 h	2	98	0.25	0.158275	0	0	1	1	0	NADPH inhibitor|Vitamin B	HCAR2|HCAR3|DGAT2|HCAR1|NNMT|QPRT	-0.6172	1.4467	-1.6032
CPC009_HA1E_6H:BRD-K74501079-001-13-2:10	BRD-K74501079	azithromycin	HA1E	trt_cp	10 uM	6 h	3	156	0.16	0.159754	1	0	1	1	0	Bacterial 50S ribosomal subunit inhibitor	MLNR	-0.6171	1.4461	-1.6031
CPC002_HA1E_6H:BRD-K31843556-001-01-7:10	BRD-K31843556	T-0070907	HA1E	trt_cp	10 uM	6 h	3	165	0.39	0.25651	1	1	1	1	0	PPAR receptor antagonist	PPARG	-0.6171	1.4463	-1.6031
CPC001_HCC515_6H:BRD-K09635314-001-01-8:10	BRD-K09635314	m-3M3FBS	HCC515	trt_cp	10 uM	6 h	2	61	0.16	0.0998977	1	0	1	1	0	Phospholipase activator	PLCB2|PLCB3|PLCD1|PLCG1|PLCG2	-0.6171	1.4457	-1.603
PAC001_U2OS_6H:BRD-K71430621-303-01-5:10	BRD-K71430621	clobenpropit	U2OS	trt_cp	10 uM	6 h	2	143	0.34	0.222966	0	0	1	1	0	Histamine receptor antagonist	HRH3|HRH4|HRH1|HRH2	-0.617	1.4444	-1.6028
CPC004_VCAP_24H:P15	BRD-A62525898	prednisone	VCAP	trt_cp	10 uM	24 h	6	633	0.14	0.301021	0	0	1	1	0	Glucocorticoid receptor agonist	NR3C1|HSD11B1	-0.6169	1.4434	-1.6027
CPC017_ASC_24H:BRD-K02590140-001-01-2:10	BRD-K02590140	O-2050	ASC	trt_cp	10 uM	24 h	4	90	0.09	0.0910066	1	0	1	1	0	Cannabinoid receptor antagonist	CNR1	-0.617	1.4439	-1.6027
CPC016_NEU_24H:BRD-K63504947-001-05-5:10	BRD-K63504947	semaxanib	NEU	trt_cp	10 uM	24 h	3	296	0.34	0.320786	0	0	1	1	0	VEGFR inhibitor	KDR|FLT1|KIT|PDGFRB|FLT3|MET|FGFR1|PDGFRA|RET	-0.6169	1.4425	-1.6026
CPC014_PHH_24H:BRD-K64857848-001-02-3:10	BRD-K64857848	XMD-885	PHH	trt_cp	10 uM	24 h	4	261	0.27	0.268431	0	0	1	1	0	MAP kinase inhibitor	MAPK7|LRRK2	-0.6169	1.4421	-1.6025
CPC009_A375_6H:BRD-K30649484-015-07-3:10	BRD-K30649484	mafenide	A375	trt_cp	10 uM	6 h	4	521	0.2	0.326411	0	0	1	1	0	Carbonic anhydrase inhibitor	CA6|CA12|CA14|CA2|CA4|CA9	-0.6168	1.4407	-1.6024
CPC016_A549_6H:BRD-K15868788-003-02-8:10	BRD-K15868788	SDZ-205-557	A549	trt_cp	10 uM	6 h	2	71	0.06	0.0659987	0	0	1	1	0	Serotonin receptor antagonist	HTR4|HTR3A|HTR3B	-0.6167	1.4213	-1.6021
CPC016_HEPG2_6H:BRD-K12079898-001-01-8:10	BRD-K12079898	PD-160170	HEPG2	trt_cp	10 uM	6 h	3	172	0.31	0.233494	1	0	1	1	0	Neuropeptide receptor antagonist	NPY1R	-0.6167	1.4199	-1.602
CPC015_ASC_24H:BRD-K12219985-001-15-4:10	BRD-K12219985	glipizide	ASC	trt_cp	10 uM	24 h	4	210	0.1	0.146535	0	0	1	1	0	Sulfonylurea	ABCC8|KCNJ11|KCNJ10|PPARG	-0.6166	1.4191	-1.6018
REP.B013_MDAMB231_24H:I15	BRD-K41434598	ORG-9768	MDAMB231	trt_cp	0.25 uM	24 h	2	162	0.2274	0.194081	0	0	1	1	0	Adrenergic receptor antagonist	SLC6A2|ADRA2A	-0.6166	1.4181	-1.6017
POL001_MCF7_24H:H18	BRD-A45498368	WYE-125132	MCF7	trt_cp	0.04 uM	24 h	3	258	0.54	0.377431	1	1	1	1	0	MTOR inhibitor	MTOR|PIK3CA	-0.6164	1.4164	-1.6014
CPC009_HEPG2_6H:BRD-K30649484-015-07-3:10	BRD-K30649484	mafenide	HEPG2	trt_cp	10 uM	6 h	3	377	0.44	0.411839	1	0	1	1	0	Carbonic anhydrase inhibitor	CA6|CA12|CA14|CA2|CA4|CA9	-0.6164	1.4162	-1.6013
REP.A005_A549_24H:L02	BRD-A10070317	propranolol	A549	trt_cp	3.33 uM	24 h	3	159	0.1419	0.151887	0	0	1	1	0	Adrenergic receptor antagonist	ADRB2|ADRB3	-0.6162	1.4157	-1.6008
REP.B025_A549_24H:B20	BRD-K98530306	clonidine	A549	trt_cp	0.74 uM	24 h	2	90	0.1502	0.117567	0	0	1	1	0	Adrenergic receptor agonist	ADRA2A|ADRA2B|ADRA2C|ADRA1A|ADRA1B|ADRA1D	-0.6161	1.4157	-1.6006
CPC006_AGS_6H:BRD-K67868012-003-01-5:11.1	BRD-K67868012	PI-103	AGS	trt_cp	12 uM	6 h	2	240	0.36	0.297226	1	1	1	1	0	PI3K inhibitor|MTOR inhibitor	PIK3CA|PIK3CG|MTOR|PIK3CB|PIK3CD|PRKDC	-0.6161	1.4157	-1.6005
REP.B024_A549_24H:D07	BRD-K74195153	irsogladine	A549	trt_cp	2.22 uM	24 h	2	95	0.0442	0.0655245	1	1	1	1	0	Phosphodiesterase inhibitor	PDE4A	-0.616	1.4157	-1.6003
REP.B022_HELA_24H:A08	BRD-K74363950	aclidinium	HELA	trt_cp	0.74 uM	24 h	2	112	0.2398	0.165716	1	0	1	1	0	Acetylcholine receptor antagonist	CHRM3|CHRM1|CHRM2|CHRM4|CHRM5	-0.6159	1.4157	-1.6
CPC010_HCC515_6H:BRD-A43885598-001-05-7:10	BRD-A43885598	SID-7969543	HCC515	trt_cp	10 uM	6 h	3	69	0.06	0.0650625	1	0	1	1	0	Steroid	NR5A1	-0.6159	1.4157	-1.5999
LJP001_HS578T_24H:BRD-K52751261-001-02-0:0.4	BRD-K52751261	TAK-715	HS578T	trt_cp	0.37 uM	24 h	3	84	0.15	0.113505	0	0	1	1	0	P38 MAPK inhibitor	MAPK14|TNF	-0.6157	1.4157	-1.5995
CPC016_NEU_24H:BRD-K22010301-001-01-2:10	BRD-K22010301	JLK-6	NEU	trt_cp	10 uM	24 h	3	87	0.09	0.089477	0	0	1	1	0	Gamma secretase inhibitor|Beta amyloid inhibitor	PSEN1	-0.6157	1.4156	-1.5994
CPC003_HCC515_6H:BRD-K64994968-001-03-6:10	BRD-K64994968	progesterone	HCC515	trt_cp	10 uM	6 h	3	544	0.41	0.477553	1	0	1	1	0	Progesterone receptor agonist	PGR|CYP17A1|NR3C2|CYP2C19|CATSPER1|CATSPER2|CATSPER3|CATSPER4|ESR1|OPRK1|TRPC5	-0.6157	1.4157	-1.5994
CPC018_PHH_24H:BRD-A56012032-001-05-6:10	BRD-A56012032	thiorphan	PHH	trt_cp	10 uM	24 h	3	289	0.32	0.307507	0	0	1	1	0	Membrane integrity inhibitor	MME	-0.6156	1.4151	-1.5992
CPC020_HA1E_6H:BRD-A09472452-015-19-2:10	BRD-A09472452	flecainide	HA1E	trt_cp	10 uM	6 h	3	97	0.2	0.140842	1	0	1	1	0	Sodium channel inhibitor	SCN5A|KCNA5|KCNA7|SCN4A	-0.6156	1.4153	-1.5992
CPC016_NPC_24H:BRD-K37561857-001-06-4:10	BRD-K37561857	zardaverine	NPC	trt_cp	10 uM	24 h	4	470	0.63	0.550237	0	0	1	1	0	Phosphodiesterase inhibitor	PDE4D|PDE3A|PDE4A|PDE4B|PDE4C	-0.6155	1.4148	-1.5991
REP.B028_PC3_24H:N20	BRD-K97045029	pranlukast	PC3	trt_cp	0.74 uM	24 h	2	35	0.0269	0.0310271	1	0	1	1	0	Leukotriene receptor antagonist	CYSLTR1|CYSLTR2|IL5|MUC2|NFKB1|RNASE3|TNF	-0.6155	1.4146	-1.599
CPC016_SKB_24H:BRD-K54210043-001-02-0:10	BRD-K54210043	NS-1619	SKB	trt_cp	10 uM	24 h	3	124	0.06	0.0872202	1	0	1	1	0	Calcium channel activator	KCNMA1	-0.6155	1.4143	-1.5989
CPC004_HCC515_24H:BRD-K36055864-001-09-3:10	BRD-K36055864	cycloheximide	HCC515	trt_cp	10 uM	24 h	3	485	0.76	0.613915	1	1	1	1	0	Protein synthesis inhibitor	GSK3B|RPL3	-0.6154	1.4136	-1.5987
CPC014_HA1E_6H:BRD-K73293050-001-01-5:10	BRD-K73293050	WZ-3146	HA1E	trt_cp	10 uM	6 h	3	261	0.53	0.376087	1	1	1	1	0	EGFR inhibitor	EGFR	-0.6154	1.4137	-1.5987
MOAR003_PC3_24H:D24	BRD-K20372197	droxidopa	PC3	trt_cp	1.11 uM	24 h	2	36	0.1287	0.0688289	1	1	1	1	0	Norepinephrine inhibitor	ADRA1A|ADRA1B|ADRA1D|ADRA2A|ADRA2B|ADRA2C|ADRB1|ADRB2|ADRB3|PAH	-0.6152	1.412	-1.5983
CPC015_A549_24H:BRD-K72726508-001-01-3:10	BRD-K72726508	arcyriaflavin-a	A549	trt_cp	10 uM	24 h	3	122	0.11	0.11714	1	0	1	1	0	CDK inhibitor	CCND1|CDK4|CCNE1|CDK2	-0.6152	1.4119	-1.5982
REP.A018_A549_24H:C01	BRD-A62525898	prednisone	A549	trt_cp	10 uM	24 h	2	134	0.1861	0.159682	1	1	1	1	0	Glucocorticoid receptor agonist	NR3C1|HSD11B1	-0.6152	1.4115	-1.5981
CPC006_HA1E_24H:G02	BRD-K16406336	methylene-blue	HA1E	trt_cp	10 uM	24 h	3	395	0.6441	0.510042	1	1	1	1	0	Nitric oxide production inhibitor|Guanylyl cyclase inhibitor|Monoamine oxidase inhibitor|Tau aggregation inhibitor	ACHE|MAPT	-0.6151	1.4105	-1.5978
CPC016_A549_24H:BRD-K82731415-001-05-4:10	BRD-K82731415	olomoucine	A549	trt_cp	10 uM	24 h	3	358	0.44	0.401327	0	0	1	1	0	CDK inhibitor	CDK1|CDK2|CDK5|MAPK1	-0.6148	1.4102	-1.5972
CPC005_A375_6H:BRD-A53077924-236-01-4:10	BRD-A53077924	tianeptine	A375	trt_cp	10 uM	6 h	3	128	0.3	0.198151	1	1	1	1	0	Selective serotonin reuptake inhibitor (SSRI)	SLC6A4|OPRD1|OPRK1|OPRM1	-0.6148	1.4102	-1.5971
REP.B026_HELA_24H:K23	BRD-K92049597	triamterene	HELA	trt_cp	0.03 uM	24 h	2	75	0.2097	0.126812	1	1	1	1	0	Sodium channel inhibitor	SCNN1A|SCNN1B|SCNN1G|SCNN1D	-0.6144	1.4102	-1.5962
CPC017_A375_6H:BRD-A54927599-001-07-8:10	BRD-A54927599	KF-38789	A375	trt_cp	10 uM	6 h	3	338	0.28	0.311077	0	0	1	1	0	P selectin inhibitor	SELP	-0.6144	1.4102	-1.5961
MOAR003_A375_24H:A24	BRD-K29113274	ketoconazole	A375	trt_cp	1.11 uM	24 h	3	293	0.29	0.294756	1	1	1	1	0	Sterol demethylase inhibitor	AR|CYP19A1|CYP2C19|CYP3A5|CYP3A7|CYP21A2|KCNA10	-0.6144	1.4102	-1.5961
LJP002_SKBR3_24H:BRD-K74065929-001-02-3:10	BRD-K74065929	doramapimod	SKBR3	trt_cp	10 uM	24 h	3	282	0.37	0.32663	0	0	1	1	0	P38 MAPK inhibitor	MAPK14|MAPK11|MAPK12|DDR2|MAPK13	-0.6144	1.4102	-1.5961
CPC017_NPC_24H:BRD-A25687296-300-03-5:10	BRD-A25687296	emetine	NPC	trt_cp	10 uM	24 h	4	574	0.61	0.598345	0	0	1	1	0	Protein synthesis inhibitor	RPS2	-0.6144	1.4102	-1.5961
REP.A012_MCF10A_24H:B07	BRD-A00147595	balaglitazone	MCF10A	trt_cp	10 uM	24 h	3	113	0.3026	0.186984	1	1	1	1	0	Insulin sensitizer|PPAR receptor agonist	PPARG|INS	-0.6143	1.4102	-1.5958
LJP006_MDAMB231_24H:H13	BRD-K43389698	BMS-387032	MDAMB231	trt_cp	10 uM	24 h	2	603	0.806	0.704947	1	1	1	1	0	CDK inhibitor|Cell cycle inhibitor|MCL1 inhibitor	CDK2|CDK7|CDK9|MCL1	-0.6143	1.4102	-1.5958
REP.A026_YAPC_24H:A19	BRD-K87782578	AVL-292	YAPC	trt_cp	10 uM	24 h	2	301	0.4838	0.385875	0	0	1	1	0	BTK inhibitor	BTK|EGFR|ITK|JAK3|YES1	-0.6142	1.4102	-1.5955
REP.A020_A375_24H:B22	BRD-K83508485	FK-888	A375	trt_cp	0.37 uM	24 h	3	131	0.2368	0.178097	0	0	1	1	0	Tachykinin antagonist	TACR1|TACR2	-0.6142	1.4102	-1.5955
REP.A020_MDAMB231_24H:F19	BRD-K86930074	cediranib	MDAMB231	trt_cp	10 uM	24 h	2	331	0.5215	0.420118	1	1	1	1	0	VEGFR inhibitor|KIT inhibitor	KDR|FLT1|FLT4|KIT|PDGFRB|CSF1R|FLT3|PDGFRA	-0.6141	1.4102	-1.5954
LJP008_SKL_24H:B07	BRD-K92428232	GSK-461364	SKL	trt_cp	10 uM	24 h	3	471	0.6879	0.575577	1	1	1	1	0	PLK inhibitor	PLK1	-0.6141	1.4102	-1.5954
CPC006_NCIH2073_6H:BRD-K73261812-001-01-1:10	BRD-K73261812	BRD-K73261812	NCIH2073	trt_cp	10 uM	6 h	2	149	0.21	0.178868	0	0	1	1	0	Beta catenin inhibitor	CTNNB1	-0.6141	1.4102	-1.5953
REP.A014_HEK293_24H:F23	BRD-K59197931	naproxen	HEK293	trt_cp	0.125 uM	24 h	3	134	0.1092	0.122319	0	0	1	1	0	Cyclooxygenase inhibitor	PTGS2|PTGS1	-0.6141	1.4102	-1.5952
CPC006_U937_6H:BRD-A02481876-001-09-9:60	BRD-A02481876	importazole	U937	trt_cp	60 uM	6 h	2	528	0.69	0.61034	0	0	1	1	0	Importin inhibitor	KPNB1	-0.614	1.4102	-1.5951
REP.A027_A375_24H:A19	BRD-K92723993	imatinib	A375	trt_cp	10 uM	24 h	3	325	0.407	0.367764	0	0	1	1	0	PDGFR inhibitor|Bcr-Abl inhibitor|KIT inhibitor	ABL1|KIT|PDGFRA|BCR|CSF1R|PDGFRB|ABCG2|CYP2C19|CYP2C8|CYP3A5|DDR1|NTRK1|RET	-0.614	1.4102	-1.595
CPC011_MCF7_24H:BRD-K33226500-065-07-2:10	BRD-K33226500	indinavir	MCF7	trt_cp	10 uM	24 h	2	147	0.4	0.245199	0	0	1	1	0	HIV inhibitor	CYP3A5|CYP3A4|CYP3A7	-0.6138	1.4102	-1.5945
REP.A026_HEK293_24H:O19	BRD-A20348246	chlormezanone	HEK293	trt_cp	10 uM	24 h	2	114	0.0782	0.0954743	0	0	1	1	0	GABA receptor antagonist	GABRA1|TSPO	-0.6138	1.4102	-1.5945
REP.A012_MDAMB231_24H:O08	BRD-A03249105	fulvestrant	MDAMB231	trt_cp	3.33 uM	24 h	2	170	0.2209	0.195953	0	0	1	1	0	Estrogen receptor antagonist	ESR1|EPHX2|ESR2|GPER1	-0.6137	1.4102	-1.5942
CPC006_AGS_6H:BRD-K83213911-001-02-8:80	BRD-K83213911	PF-750	AGS	trt_cp	80 uM	6 h	2	146	0.54	0.283925	1	1	1	1	0	FAAH inhibitor	FAAH	-0.6136	1.4102	-1.5941
REP.A001_MCF7_24H:N24	BRD-K29735307	ostarine	MCF7	trt_cp	0.04 uM	24 h	3	158	0.283	0.213822	0	0	1	1	0	Androgen receptor antagonist	AR	-0.6136	1.4102	-1.5941
CPC018_HT29_6H:BRD-K88701661-001-01-1:10	BRD-K88701661	dimercaptosuccinic-acid	HT29	trt_cp	10 uM	6 h	5	263	0.21	0.237639	1	0	1	1	0	Chelating agent	DNMT1	-0.6136	1.4102	-1.5941
CPC017_ASC_24H:BRD-K95309561-001-15-5:10	BRD-K95309561	dienestrol	ASC	trt_cp	10 uM	24 h	4	473	0.06	0.170348	0	0	1	1	0	Estrogen receptor agonist	ESR1	-0.6136	1.4102	-1.594
REP.A001_MCF7_24H:L11	BRD-A29260609	acebutolol	MCF7	trt_cp	0.125 uM	24 h	3	97	0.0768	0.0872764	0	0	1	1	0	Adrenergic receptor antagonist	ADRB1|ADRB2	-0.6135	1.4102	-1.5938
REP.B027_HA1E_24H:N22	BRD-K99604664	tanaproget	HA1E	trt_cp	0.08 uM	24 h	2	66	0.1357	0.0956957	1	1	1	1	0	Progesterone receptor agonist	PGR	-0.6135	1.4102	-1.5937
CPC018_SKB_24H:BRD-K43887077-001-02-8:10	BRD-K43887077	dopamine	SKB	trt_cp	10 uM	24 h	3	185	0.23	0.208584	0	0	1	1	0	Dopamine receptor agonist	DRD2|DRD1|DRD3|DRD4|DRD5|DBH|HTR1A|HTR7|SLC6A2|SLC6A3|SLC6A4	-0.6134	1.4102	-1.5936
CPC017_ASC_24H:BRD-K29173907-001-03-5:10	BRD-K29173907	isoflupredone-acetate	ASC	trt_cp	10 uM	24 h	3	236	0.24	0.240654	1	0	1	1	0	Glucocorticoid receptor agonist	NR3C1	-0.6134	1.4102	-1.5935
REP.A018_YAPC_24H:D13	BRD-K62734952	arglabin	YAPC	trt_cp	10 uM	24 h	3	113	0.2512	0.170365	0	0	1	1	0	Farnesyltransferase inhibitor	FNTA|NFKB1	-0.6133	1.4102	-1.5932
REP.A011_YAPC_24H:G01	BRD-K05524748	dronedarone	YAPC	trt_cp	10 uM	24 h	3	269	0.4448	0.349775	0	0	1	1	0	Adrenergic receptor antagonist	SLC22A2|SLC22A8|SLCO1B3|ADRA1A|ADRA1B|ADRA1D|ADRA2A|ADRA2B|ADRA2C|ADRB1|CACNA1C|CACNA1D|CACNA1F|CACNA1S|CACNB1|CACNB2|CACNB3|CACNB4|KCNA5|KCNH2|KCNK2|SCN1A	-0.6133	1.4102	-1.5932
REP.B022_HUVEC.A_24H:O08	BRD-K81957469	semagacestat	HUVEC	trt_cp	0.74 uM	24 h	2	121	0.1425	0.132779	0	0	1	1	0	Gamma secretase inhibitor	PSEN1	-0.613	1.4097	-1.5924
REP.A022_HEK293_24H:N23	BRD-A81233518	glycopyrrolate	HEK293	trt_cp	0.125 uM	24 h	3	175	0.2463	0.209934	0	0	1	1	0	Acetylcholine receptor antagonist	CHRM3|CHRM1|CHRM2|CHRM4|CHRM5	-0.6129	1.4092	-1.5922
MUC.CP002_NKDBA_24H:A11	BRD-K78126613	menadione	NKDBA	trt_cp	12 uM	24 h	6	478	0.3019	0.384128	0	0	1	1	0	Mitochondrial inhibitor|Phosphatase inhibitor	PKM|AOX1|BGLAP|F10|F2|F7|F9|GGCX|NQO1|NQO2|PROC|PROS1|PROZ|VKORC1|VKORC1L1	-0.6129	1.409	-1.5921
REP.B027_YAPC_24H:J01	BRD-K97158071	droperidol	YAPC	trt_cp	2.22 uM	24 h	2	100	0.2302	0.15342	1	1	1	1	0	Dopamine receptor antagonist	DRD2|ADRA1A|DRD3|DRD4|HTR2A	-0.6127	1.4068	-1.5916
REP.B024_JURKAT_24H:I11	BRD-K76810206	nicergoline	JURKAT	trt_cp	0.03 uM	24 h	2	193	0.1565	0.175738	1	1	1	1	0	Adrenergic receptor antagonist	ADRA1A	-0.6127	1.4069	-1.5916
REP.A007_YAPC_24H:O24	BRD-K51040301	cobicistat	YAPC	trt_cp	0.04 uM	24 h	3	343	0.5458	0.437516	1	1	1	1	0	Cytochrome P450 inhibitor	CYP3A4|SLCO1B3|CYP3A43|CYP3A5|CYP3A7	-0.6127	1.4069	-1.5916
PAC003_U2OS_6H:BRD-K29555132-001-02-2:1	BRD-K29555132	arachidonamide	U2OS	trt_cp	1.11 uM	6 h	2	32	0.22	0.0848432	1	0	1	1	0	Cannabinoid receptor agonist	CNR1|CNR2	-0.6127	1.407	-1.5916
REP.B010_PC3_24H:B13	BRD-K12219985	glipizide	PC3	trt_cp	2.22 uM	24 h	2	111	0.1056	0.109477	0	0	1	1	0	Sulfonylurea	ABCC8|KCNJ11|KCNJ10|PPARG	-0.6126	1.3962	-1.5913
CPC006_U937_6H:BRD-K21672174-001-02-2:160	BRD-K21672174	Ro-28-1675	U937	trt_cp	150 uM	6 h	2	403	0.74	0.552203	1	1	1	1	0	Glucokinase activator	GCK	-0.6126	1.4009	-1.5913
CPC011_A375_6H:BRD-K39484304-001-08-2:10	BRD-K39484304	triptolide	A375	trt_cp	10 uM	6 h	3	482	0.64	0.561622	1	1	1	1	0	RNA polymerase inhibitor	CYP2C19|RELA	-0.6125	1.3877	-1.5911
CPC002_HA1E_6H:BRD-A11813248-003-01-6:10	BRD-A11813248	AM-92016	HA1E	trt_cp	10 uM	6 h	3	199	0.24	0.220985	1	0	1	1	0	Potassium channel antagonist	GRIN2B|GRIN1	-0.6125	1.3884	-1.5911
CPC006_MCF7_6H:BRD-K54233340-300-01-0:10	BRD-K54233340	dorsomorphin	MCF7	trt_cp	10 uM	6 h	5	620	0.64	0.636966	1	1	1	1	0	AMPK inhibitor	ACVR1|BMPR1A|BMPR1B|EPHA2|FKBP1A|FLT1|FLT3|KDR|LCK|MKNK1|PRKAA1|RPS6KA1|SRC	-0.6124	1.3867	-1.591
CPC006_HT29_24H:BRD-K06890060-001-05-9:40	BRD-K06890060	alda-1	HT29	trt_cp	40 uM	24 h	4	73	0.27	0.141963	1	0	1	1	0	Aldehyde dehydrogenase activator	ALDH2	-0.6124	1.3854	-1.5909
CRCGN004_PC3_24H:BRD-K01815685-002-01-3:10	BRD-K01815685	BRD-K01815685	PC3	trt_cp	10 uM	24 h	6	134	0.2	0.165538	1	1	1	1	0	Aryl hydrocarbon receptor agonist|Indoleamine 2,3-dioxygenase inhibitor	AHR|IDO1	-0.6124	1.3844	-1.5908
CPC011_VCAP_6H:BRD-K44353683-001-04-2:10	BRD-K44353683	nateglinide	VCAP	trt_cp	10 uM	6 h	5	374	0.17	0.254971	0	0	1	1	0	Insulin secretagogue	ABCC8|KCNJ11|CYP3A4|INS|KCNJ10|PPARG	-0.6124	1.3846	-1.5908
REP.A010_PC3_24H:E01	BRD-K12885236	dapivirine	PC3	trt_cp	10 uM	24 h	3	336	0.5845	0.448118	0	0	1	1	0	Non-nucleoside reverse transcriptase inhibitor	CYP3A5|CYP2B6|CYP2C19|CYP2C8|CYP3A4	-0.6124	1.3848	-1.5908
CPC016_NPC_24H:BRD-A91008255-003-16-4:10	BRD-A91008255	bepridil	NPC	trt_cp	10 uM	24 h	4	171	0.1	0.13223	0	0	1	1	0	Calcium channel blocker	CACNA1C|SCN5A|ATP1A1|CACNA1A|CACNA1H|CACNA2D2|CALM1|KCNQ1|KCNQ4|PDE1A|PDE1B|TNNC1	-0.6123	1.3835	-1.5906
REP.B007_PC3_24H:A23	BRD-K42898655	temsirolimus	PC3	trt_cp	0.03 uM	24 h	2	370	0.6157	0.482632	1	1	1	1	0	MTOR inhibitor	MTOR|PTEN	-0.6123	1.3836	-1.5906
CPC020_VCAP_24H:BRD-K10016611-003-02-2:10	BRD-K10016611	BRD-K10016611	VCAP	trt_cp	10 uM	24 h	5	165	0.14	0.153687	1	0	1	1	0	Acetylcholinesterase inhibitor	ACHE	-0.6122	1.3823	-1.5905
LJP008_HEPG2_24H:F03	BRD-K82928847	ACY-1215	HEPG2	trt_cp	1.11 uM	24 h	2	56	0.1509	0.0929542	0	0	1	1	0	HDAC inhibitor	HDAC6|HDAC1|HDAC2|HDAC3|HDAC8	-0.6121	1.3795	-1.5902
CPC013_ASC_24H:BRD-A25569250-001-01-7:10	BRD-A25569250	KI-16425	ASC	trt_cp	10 uM	24 h	4	249	0.34	0.294218	1	1	1	1	0	Lysophosphatidic acid receptor antagonist	LPAR1|LPAR3	-0.6121	1.3776	-1.5901
PBIOA020_PC3_24H:O19	BRD-K78978711	KHS-101	PC3	trt_cp	10 uM	24 h	3	401	0.52	0.461747	1	1	1	1	0	Neural stem cell inducer	TACC3	-0.612	1.3682	-1.5898
CPC012_HA1E_6H:BRD-K47761761-050-04-5:10	BRD-K47761761	PD-168077	HA1E	trt_cp	10 uM	6 h	3	91	0.06	0.0747183	1	0	1	1	0	Dopamine receptor agonist	DRD4|DRD2	-0.6119	1.3682	-1.5896
REP.B009_HT29_24H:A19	BRD-K28307902	flutamide	HT29	trt_cp	2.22 uM	24 h	2	656	0.6415	0.655965	0	0	1	1	0	Androgen receptor antagonist	AR|CYP2C19|AHR	-0.6118	1.3682	-1.5893
REP.A012_HEK293_24H:E09	BRD-A00938334	drospirenone	HEK293	trt_cp	1.11 uM	24 h	3	70	0.1522	0.104373	1	0	1	1	0	Mineralocorticoid receptor antagonist	NR3C2|PGR|AR	-0.6118	1.3682	-1.5893
CPC016_HEPG2_6H:BRD-K92760278-001-02-4:10	BRD-K92760278	riboflavin	HEPG2	trt_cp	10 uM	6 h	3	126	0.17	0.147993	1	0	1	1	0	Vitamin B	BLVRB|RFK	-0.6116	1.3682	-1.5889
PBIOA018_A375_24H:M24	BRD-K92441787	bexarotene	A375	trt_cp	0.04 uM	24 h	3	194	0.25	0.22269	1	1	1	1	0	Retinoid receptor agonist	RXRA|RXRB|RXRG|ABCA1|CYP2C8|CYP3A4	-0.6116	1.3682	-1.5889
REP.B021_HEK293_24H:A18	BRD-K80343549	TAK-285	HEK293	trt_cp	0.01 uM	24 h	2	85	0.1047	0.0953923	0	0	1	1	0	EGFR inhibitor	ERBB2|EGFR	-0.6116	1.3682	-1.5888
CPC014_PHH_24H:BRD-K81528515-001-03-9:10	BRD-K81528515	nilotinib	PHH	trt_cp	10 uM	24 h	4	73	0.13	0.0985062	0	0	1	1	0	Bcr-Abl inhibitor|Abl inhibitor	ABL1|KIT|BCR|CYP2B6|CYP2C8|DDR1|DDR2|PDGFRA	-0.6115	1.3682	-1.5884
REP.A010_A375_24H:G01	BRD-A13133631	BRD-A13133631	A375	trt_cp	10 uM	24 h	3	312	0.5866	0.432592	0	0	1	1	0	Glucocorticoid receptor agonist	NR3C1	-0.6114	1.3682	-1.5883
REP.A003_JURKAT_24H:P24	BRD-K36732695	setiptiline	JURKAT	trt_cp	0.04 uM	24 h	2	107	0.0155	0.0411802	0	0	1	1	0	Adrenergic receptor antagonist	HTR2A|HTR2C|HRH1	-0.6113	1.3682	-1.5881
CPC006_H1299_6H:BRD-K09635314-001-02-6:80	BRD-K09635314	m-3M3FBS	H1299	trt_cp	80 uM	6 h	2	438	0.56	0.500797	0	0	1	1	0	Phospholipase activator	PLCB2|PLCB3|PLCD1|PLCG1|PLCG2	-0.6113	1.3682	-1.5881
REP.A018_YAPC_24H:A15	BRD-K62196610	AVN-944	YAPC	trt_cp	1.11 uM	24 h	3	239	0.5005	0.349729	0	0	1	1	0	Inosine monophosphate dehydrogenase inhibitor	IMPDH2|IMPDH1	-0.6113	1.3682	-1.588
CPC004_VCAP_24H:H20	BRD-A68723818	brompheniramine	VCAP	trt_cp	10 uM	24 h	6	350	0.38	0.368771	0	0	1	1	0	Histamine receptor antagonist	HRH1|CHRM1|CHRM2|CHRM3|CHRM4|CHRM5	-0.6113	1.3682	-1.588
REP.A026_A549_24H:J07	BRD-K91263825	nortriptyline	A549	trt_cp	10 uM	24 h	2	272	0.5223	0.381132	0	0	1	1	0	Tricyclic antidepressant	KCNJ10|SLC6A2|SLC6A4|CYP2C19|PIK3CD|ADRA1A|ADRA1B|ADRA1D|ADRA2A|ADRA2B|ADRA2C|ADRB1|ADRB2|ADRB3|CHRM1|CHRM2|CHRM3|CHRM4|CHRM5|DRD2|HRH1|HTR1A|HTR2A|HTR2C|HTR6|PGRMC1|SIGMAR1	-0.6113	1.3682	-1.588
CPC014_NPC_24H:BRD-K98684188-001-01-1:10	BRD-K98684188	GSK-0660	NPC	trt_cp	10 uM	24 h	3	118	0.18	0.14737	0	0	1	1	0	PPAR receptor antagonist	PPARD	-0.6112	1.3682	-1.5877
CPC015_HEPG2_6H:BRD-K66874953-004-01-3:10	BRD-K66874953	pifithrin-alpha	HEPG2	trt_cp	10 uM	6 h	2	239	0.29	0.266213	0	0	1	1	0	p53 inhibitor	TP53	-0.6112	1.3682	-1.5877
CPC016_NEU_24H:BRD-K92000912-001-06-8:10	BRD-K92000912	AM-251	NEU	trt_cp	10 uM	24 h	3	79	0.05	0.063552	0	0	1	1	0	Cannabinoid receptor antagonist	CNR1|GPR18|GPR55	-0.6111	1.3682	-1.5876
REP.A020_YAPC_24H:F14	BRD-K86118762	linsitinib	YAPC	trt_cp	3.33 uM	24 h	3	221	0.3984	0.300045	1	1	1	1	0	IGF-1 inhibitor	IGF1R|INSR|INSRR	-0.611	1.3682	-1.5872
REP.A027_PC3_24H:L24	BRD-K99504665	goserelin-acetate	PC3	trt_cp	0.04 uM	24 h	3	175	0.1553	0.1667	0	0	1	1	0	Gonadotropin receptor agonist	GNRHR|GNRH1|LHCGR	-0.6109	1.3682	-1.5869
CPC014_HEPG2_6H:BRD-K83794624-001-01-7:10	BRD-K83794624	pirarubicin	HEPG2	trt_cp	10 uM	6 h	3	546	0.53	0.543957	0	0	1	1	0	Topoisomerase inhibitor	TOP2A	-0.6108	1.3682	-1.5868
LJP002_MDAMB231_6H:BRD-K91900765-001-02-7:0.4	BRD-K91900765	VX-745	MDAMB231	trt_cp	0.37 uM	6 h	3	454	0.54	0.500674	0	0	1	1	0	P38 MAPK inhibitor	MAPK14|MAPK11|MAPK12	-0.6107	1.3682	-1.5864
CPC006_H1299_6H:BRD-K34581968-001-01-2:11.1	BRD-K34581968	BMS-536924	H1299	trt_cp	12 uM	6 h	2	200	0.42	0.293069	0	0	1	1	0	IGF-1 inhibitor	IGF1R|INSR|AKT1|CCNE1|CDK2|CYP3A4|ERBB2|KDR|LCK|MAPK1|MET|PDGFRA|PDGFRB	-0.6106	1.3682	-1.5863
EMU001_MINO_3H:D07	BRD-K81528515	nilotinib	MINO	trt_cp	10 uM	3 h	3	99	0.2043	0.143808	0	0	1	1	0	Bcr-Abl inhibitor|Abl inhibitor	ABL1|KIT|BCR|CYP2B6|CYP2C8|DDR1|DDR2|PDGFRA	-0.6105	1.3682	-1.5859
CPC014_PC3_6H:BRD-K85985071-001-20-7:10	BRD-K85985071	ellipticine	PC3	trt_cp	10 uM	6 h	4	319	0.57	0.431185	1	1	1	1	0	Topoisomerase inhibitor	TOP2A|TOP2B	-0.6104	1.3682	-1.5856
CPC011_A375_6H:BRD-K60511616-236-04-8:10	BRD-K60511616	pravastatin	A375	trt_cp	10 uM	6 h	3	80	0.13	0.103121	1	0	1	1	0	HMGCR inhibitor	HMGCR|SLCO1B1	-0.6103	1.3682	-1.5855
REP.B019_YAPC_24H:P10	BRD-K50498985	taladegib	YAPC	trt_cp	0.08 uM	24 h	2	99	0.1637	0.128728	1	1	1	1	0	Smoothened receptor antagonist	DHH|IHH|SMO|PTCH1	-0.6103	1.3682	-1.5854
LJP005_MDAMB231_3H:H24	BRD-A41692738	TGX-221	MDAMB231	trt_cp	0.04 uM	3 h	2	78	0.2203	0.132552	1	1	1	1	0	PI3K inhibitor	PIK3CB|PIK3CD	-0.6103	1.3682	-1.5854
TAA001_SHSY5Y_24H:P10	BRD-K35719256	rotundine	SHSY5Y	trt_cp	0.37 uM	24 h	3	153	0.23	0.189688	0	0	1	1	0	Serotonin receptor agonist	DRD1|DRD2|HTR1A|HTR1D|HTR4|HTR7|DRD3	-0.6102	1.3681	-1.5852
CPC015_SKB_24H:BRD-A68930007-001-03-1:10	BRD-A68930007	ouabain	SKB	trt_cp	10 uM	24 h	2	543	0.58	0.567472	0	0	1	1	0	Na/K-ATPase inhibitor	ATP1A1|ATP1A2|ATP1A3|ATP1A4|ATP1B1|ATP1B2|ATP1B3|ATP1B4|FXYD2	-0.6102	1.3681	-1.5852
AICHI002_NALM6_24H:H08	BRD-K67844266	MLN-4924	NALM6	trt_cp	2.5 uM	24 h	3	669	0.79	0.735118	0	0	1	1	0	Nedd activating enzyme inhibitor	NAE1|UBA3	-0.6102	1.3681	-1.5852
CPC016_HEPG2_6H:BRD-K87049188-001-03-6:10	BRD-K87049188	fusaric-acid	HEPG2	trt_cp	10 uM	6 h	3	149	0.19	0.170138	1	0	1	1	0	Dopamine receptor antagonist	DBH	-0.61	1.3675	-1.5848
CPC006_A375_24H:BRD-K15563106-001-08-1:177.6	BRD-K15563106	phloretin	A375	trt_cp	200 uM	24 h	5	577	0.71	0.647214	1	1	1	1	0	Sodium channel inhibitor	AQP9|CLCN3|SLC23A1	-0.6101	1.3675	-1.5848
CPC006_A549_6H:BRD-K73789395-001-06-5:102.71	BRD-K73789395	ZM-336372	A549	trt_cp	100 uM	6 h	4	293	0.53	0.398476	1	1	1	1	0	RAF inhibitor	BRAF|LCK|MAPK14|RAF1	-0.6101	1.3675	-1.5848
CPC006_AGS_6H:BRD-A93255169-001-13-5:10	BRD-A93255169	thalidomide	AGS	trt_cp	10 uM	6 h	2	90	0.2	0.135665	1	1	1	1	0	TNF inhibitor	TNF|CRBN|CYP1A2|CYP2B6|CYP2C19|CYP3A5|FGFR2|NFKB1|ORM1|ORM2|PTGS2	-0.6099	1.3675	-1.5845
CPC016_NPC_24H:BRD-K25875056-001-01-2:10	BRD-K25875056	SC-9	NPC	trt_cp	10 uM	24 h	4	104	0.05	0.0729176	0	0	1	1	0	Protein synthesis stimulant	PRKCA	-0.6099	1.3673	-1.5844
CPC005_VCAP_6H:BRD-K40624912-003-02-3:10	BRD-K40624912	ZM-39923	VCAP	trt_cp	10 uM	6 h	4	158	0.11	0.133308	0	0	1	1	0	JAK inhibitor	JAK1|JAK3	-0.6099	1.367	-1.5843
EMU001_NALM6_24H:N19	BRD-K62391742	GDC-0199	NALM6	trt_cp	10 uM	24 h	2	786	0.8107	0.807183	0	0	1	1	0	BCL inhibitor	BCL2	-0.6098	1.366	-1.5841
CPC016_HEPG2_6H:BRD-K79425933-001-03-6:10	BRD-K79425933	benperidol	HEPG2	trt_cp	10 uM	6 h	3	132	0.18	0.155867	1	1	1	1	0	Dopamine receptor antagonist	DRD2	-0.6098	1.3663	-1.5841
CPC004_HEPG2_6H:BRD-K08109516-001-02-9:10	BRD-K08109516	L-701324	HEPG2	trt_cp	10 uM	6 h	3	244	0.18	0.211915	1	0	1	1	0	Glutamate receptor antagonist	GRIN1|GRIN2A|GRIN2B|GRIN2C|GRIN2D	-0.6098	1.3664	-1.5841
CPC001_VCAP_24H:E07	BRD-K96862998	pirfenidone	VCAP	trt_cp	10 uM	24 h	5	127	0.1425	0.136032	0	0	1	1	0	TGF-beta receptor inhibitor	TNF|MAPK14|TNFRSF1A|FURIN	-0.6097	1.3652	-1.584
CPC015_NPC_24H:BRD-A68930007-001-03-1:10	BRD-A68930007	ouabain	NPC	trt_cp	10 uM	24 h	3	688	0.72	0.71169	0	0	1	1	0	Na/K-ATPase inhibitor	ATP1A1|ATP1A2|ATP1A3|ATP1A4|ATP1B1|ATP1B2|ATP1B3|ATP1B4|FXYD2	-0.6097	1.3625	-1.5838
CPC011_A375_6H:BRD-K49481516-004-14-2:10	BRD-K49481516	galantamine	A375	trt_cp	10 uM	6 h	3	561	0.36	0.454426	0	0	1	1	0	Acetylcholinesterase inhibitor	ACHE|BCHE|CHRNA1|CHRNA10|CHRNA2|CHRNA3|CHRNA4|CHRNA5|CHRNA6|CHRNA7|CHRNA9|CHRNB1|CHRNB2|CHRNB3|CHRNB4|CHRND|CHRNE|CHRNG	-0.6097	1.3637	-1.5838
REP.A012_MDAMB231_24H:E01	BRD-K00674894	orteronel	MDAMB231	trt_cp	10 uM	24 h	2	76	0.1104	0.0926237	0	0	1	1	0	Androgen receptor antagonist|Cytochrome P450 inhibitor	CYP17A1	-0.6096	1.3606	-1.5837
CPC009_HA1E_6H:BRD-A47598013-001-03-4:10	BRD-A47598013	citalopram	HA1E	trt_cp	10 uM	6 h	3	334	0.43	0.383211	1	1	1	1	0	Serotonin receptor antagonist	SLC6A4|SLC6A2	-0.6096	1.362	-1.5837
CPC017_PHH_24H:BRD-K08252256-236-17-1:10	BRD-K08252256	diclofenac	PHH	trt_cp	10 uM	24 h	3	85	0.23	0.141385	0	0	1	1	0	Cyclooxygenase inhibitor	PTGS1|PTGS2|CYP2C8|AKR1C3|ALOX5|ASIC1|ASIC3|KCNQ2|KCNQ3|PLA2G2A|PPARG|SCN4A	-0.6094	1.3419	-1.5831
REP.B015_HELA_24H:D05	BRD-K56195681	losmapimod	HELA	trt_cp	0.03 uM	24 h	2	241	0.5119	0.355166	1	1	1	1	0	P38 MAPK inhibitor	MAPK14	-0.6093	1.3419	-1.583
CPC006_PC3_24H:O16	BRD-K39503511	quiflapon	PC3	trt_cp	80 uM	24 h	5	505	0.7354	0.616223	1	1	1	1	0	Leukotriene inhibitor	ALOX5AP|ALOX5	-0.6093	1.3419	-1.5829
CPD003_PC3_24H:BRD-A10977446-001-08-9:10	BRD-A10977446	carvedilol	PC3	trt_cp	10 uM	24 h	2	297	0.44	0.36554	1	1	1	1	0	Adrenergic receptor antagonist	ADRB1|ADRB2|ADRA1A|ADRA1B|ADRA1D|ADRB3|CYP2C19|CYP2E1|RYR2|ADRA2A|ADRA2B|ADRA2C|GJA1|HIF1A|KCNH2|NDUFC2|NPPB|SELE|VCAM1|VEGFA	-0.6093	1.3419	-1.5829
PAC002_U2OS_6H:BRD-K41567364-001-01-2:10	BRD-K41567364	SB-334867	U2OS	trt_cp	10 uM	6 h	2	234	0.07	0.129416	0	0	1	1	0	Orexin receptor antagonist	HCRTR1|HCRTR2	-0.6092	1.3419	-1.5827
REP.A028_HELA_24H:B20	BRD-K92613113	safinamide	HELA	trt_cp	3.33 uM	24 h	3	240	0.1483	0.190769	0	0	1	1	0	Dopamine receptor antagonist|Glutamate inhibitor|Monoamine oxidase inhibitor	MAOB|SLC6A3	-0.6092	1.3419	-1.5826
REP.B011_PC3_24H:C09	BRD-K04691817	AGI-6780	PC3	trt_cp	0.25 uM	24 h	2	77	0.2056	0.127229	0	0	1	1	0	Isocitrate dehydrogenase inhibitor	IDH2	-0.6091	1.3419	-1.5823
CPC016_ASC_24H:BRD-A35623999-001-04-0:10	BRD-A35623999	CGP-37157	ASC	trt_cp	10 uM	24 h	3	299	0.34	0.322408	1	0	1	1	0	Calcium channel blocker|Mitochondrial Na+/Ca2+ exchanger antagonist|Sodium/calcium exchange inhibitor	SLC8A1	-0.6088	1.3419	-1.5815
LKCP002_U2OS_48H:D06	BRD-K50498985	taladegib	U2OS	trt_cp	0.12 uM	48 h	4	68	0.1755	0.110465	1	0	1	1	0	Smoothened receptor antagonist	DHH|IHH|SMO|PTCH1	-0.6087	1.3419	-1.5813
REP.A005_A375_24H:N01	BRD-K10961822	latanoprost	A375	trt_cp	10 uM	24 h	3	137	0.2755	0.19645	1	1	1	1	0	Prostanoid receptor agonist	PTGFR	-0.6087	1.3419	-1.5813
REP.A019_HEK293_24H:D01	BRD-K45168550	SB-756050	HEK293	trt_cp	10 uM	24 h	2	278	0.1803	0.226387	0	0	1	1	0	G protein-coupled receptor agonist	GPBAR1	-0.6086	1.3419	-1.5811
TAA001_SHSY5Y_24H:I01	BRD-K17896185	FIT	SHSY5Y	trt_cp	10 uM	24 h	3	180	0.37	0.260956	0	0	1	1	0	Opioid receptor agonist	OPRD1	-0.6086	1.3419	-1.581
CPC018_NPC_24H:BRD-A18917088-001-03-1:10	BRD-A18917088	estradiol	NPC	trt_cp	10 uM	24 h	3	227	0.48	0.333783	0	0	1	1	0	Estrogen receptor agonist	ESR1|ESR2|NR1I2|CYP2B6|CYP2C19|CYP2C8|CYP2E1|CYP3A5|CYP3A7|GPER1|KCNMA1	-0.6085	1.3419	-1.5808
REP.B022_YAPC_24H:A09	BRD-K74363950	aclidinium	YAPC	trt_cp	0.25 uM	24 h	2	94	0.1339	0.113445	0	0	1	1	0	Acetylcholine receptor antagonist	CHRM3|CHRM1|CHRM2|CHRM4|CHRM5	-0.6084	1.3419	-1.5804
CPC004_A375_6H:BRD-K60274257-001-01-1:10	BRD-K60274257	dephostatin	A375	trt_cp	10 uM	6 h	3	312	0.23	0.270877	1	1	1	1	0	Tyrosine phosphatase inhibitor	PTPN1|PTPN6	-0.6083	1.3419	-1.5803
CPC004_VCAP_6H:BRD-K75699339-057-03-2:10	BRD-K75699339	rizatriptan	VCAP	trt_cp	10 uM	6 h	4	171	0.2	0.187001	1	0	1	1	0	Serotonin receptor agonist	HTR1D|HTR1B|HTR1F|HTR1A|HTR1E	-0.6082	1.3419	-1.5801
REP.B022_HUVEC.A_24H:D08	BRD-K68232413	etizolam	HUVEC	trt_cp	0.74 uM	24 h	2	92	0.1527	0.119852	0	0	1	1	0	Benzodiazepine receptor agonist	GABRA1|GABRA2|GABRA3|GABRA5|PTAFR	-0.6083	1.3419	-1.5801
CPC004_HCC515_6H:BRD-K39915878-036-15-2:10	BRD-K39915878	loxapine	HCC515	trt_cp	10 uM	6 h	3	96	0.17	0.129179	1	0	1	1	0	Dopamine receptor antagonist|Serotonin receptor antagonist	DRD2|DRD3|DRD4|HTR2A|HTR2C|DRD1|HRH1|HTR6|ADRA1A|ADRA1B|ADRA2A|ADRA2B|ADRA2C|ADRB1|CHRM1|CHRM2|CHRM3|CHRM4|CHRM5|DRD5|HRH2|HRH4|HTR1A|HTR1B|HTR1D|HTR1E|HTR3A|HTR5A|HTR7|SLC6A2|SLC6A3|SLC6A4	-0.6083	1.3419	-1.5801
REP.A028_PC3_24H:N07	BRD-A96754982	tacrolimus	PC3	trt_cp	10 uM	24 h	2	160	0.1579	0.160724	0	0	1	1	0	Calcineurin inhibitor	FKBP1A|CYP3A5|CYP3A7	-0.6082	1.3419	-1.5799
REP.A022_HT29_24H:C01	BRD-K68103045	CGS-20625	HT29	trt_cp	10 uM	24 h	3	572	0.6094	0.597008	1	1	1	1	0	Benzodiazepine receptor agonist	GABRA1|GABRA2|GABRA3|GABRA5|GABRA4|GABRA6	-0.6081	1.3419	-1.5798
REP.B016_MCF7_24H:B14	BRD-K51263939	sarcosine	MCF7	trt_cp	0.74 uM	24 h	2	81	0.2095	0.131724	1	1	1	1	0	GlyT-1 inhibitor	SLC6A9	-0.6081	1.3419	-1.5797
CPC002_HCC515_24H:BRD-K96809896-300-01-5:10	BRD-K96809896	SKF-86002	HCC515	trt_cp	10 uM	24 h	3	233	0.43	0.320068	1	1	1	1	0	P38 MAPK inhibitor	ALOX5|MAPK14	-0.608	1.3419	-1.5795
REP.B006_HT29_24H:C17	BRD-K19462402	buflomedil	HT29	trt_cp	0.03 uM	24 h	2	65	0.0952	0.0795437	0	0	1	1	0	Adrenergic receptor antagonist|Calcium channel blocker	CACNA1C|ADRA1A	-0.608	1.3419	-1.5794
REP.B020_A549_24H:G21	BRD-K82236179	dicoumarol	A549	trt_cp	0.25 uM	24 h	2	213	0.2044	0.210989	0	0	1	1	0	NADPH inhibitor	VKORC1|NQO1|CRYZ	-0.608	1.3419	-1.5794
CPC011_A375_6H:BRD-K73991644-001-05-8:10	BRD-K73991644	isoquercetin	A375	trt_cp	10 uM	6 h	3	486	0.16	0.281974	0	0	1	1	0	Aldose reductase inhibitor	AKR1B1	-0.6079	1.3419	-1.5793
CPC016_NEU_24H:BRD-K92760278-001-02-4:10	BRD-K92760278	riboflavin	NEU	trt_cp	10 uM	24 h	3	152	0.23	0.189067	0	0	1	1	0	Vitamin B	BLVRB|RFK	-0.6079	1.3419	-1.5792
AICHI002_NALM6_24H:A19	BRD-K12502280	TG-101348	NALM6	trt_cp	10 uM	24 h	3	753	0.72	0.744551	0	0	1	1	0	JAK inhibitor|FLT3 inhibitor	JAK2|FLT3|RET|BRD4|JAK1|JAK3|TYK2	-0.6079	1.3419	-1.5791
CPC001_HCC515_24H:BRD-A81177136-001-03-6:10	BRD-A81177136	KN-62	HCC515	trt_cp	10 uM	24 h	3	447	0.68	0.557492	1	1	1	1	0	Calcium channel blocker|Purinergic receptor antagonist	P2RX7|CAMK2A|AKT1|CHEK1|LCK|MAPK1|MAPK11|MAPK12|MAPK14|MAPK8|PRKCA|ROCK1|RPS6KB1|SGK1	-0.6078	1.3419	-1.579
REP.A023_HT29_24H:B07	BRD-K67901620	avasimibe	HT29	trt_cp	10 uM	24 h	3	239	0.4677	0.338075	1	1	1	1	0	ACAT inhibitor	ABCB1|SOAT1|CES1	-0.6078	1.3419	-1.5789
AICHI001_OCILY10_24H:F19	BRD-K13646352	midostaurin	OCILY10	trt_cp	10 uM	24 h	2	258	0.7103	0.432874	0	0	1	1	0	FLT3 inhibitor|KIT inhibitor|PKC inhibitor	FLT3|KIT|CCNB1|FLT1|KDR|PDGFRB|PRKCA|VEGFA|PRKCG	-0.6078	1.3419	-1.5789
CPC006_NCIH508_6H:BRD-K62965247-001-01-5:10	BRD-K62965247	tipifarnib-P2	NCIH508	trt_cp	10 uM	6 h	2	152	0.1	0.124667	0	0	1	1	0	Farnesyltransferase inhibitor	FNTA|FNTB	-0.6077	1.3419	-1.5788
REP.A012_THP1_24H:J07	BRD-K02123250	JNJ-38877605	THP1	trt_cp	10 uM	24 h	3	145	0.1318	0.139789	1	0	1	1	0	MET inhibitor	MET	-0.6077	1.3419	-1.5787
REP.A027_A375_24H:L05	BRD-K93461745	buspirone	A375	trt_cp	0.125 uM	24 h	3	133	0.0565	0.0876558	0	0	1	1	0	Serotonin receptor agonist	HTR1A|DRD2	-0.6073	1.3419	-1.5777
REP.B004_A549_24H:P23	BRD-K27204852	balicatib	A549	trt_cp	0.03 uM	24 h	2	139	0.1748	0.157619	0	0	1	1	0	Cathepsin inhibitor	CTSK	-0.6072	1.3419	-1.5773
REP.B024_JURKAT_24H:J02	BRD-K76775527	nimesulide	JURKAT	trt_cp	0.74 uM	24 h	2	83	0.1377	0.108103	1	1	1	1	0	Cyclooxygenase inhibitor	PTGS2|LTF|PLA2G2E|PTGS1	-0.6071	1.3419	-1.5772
REP.B011_MCF7_24H:P04	BRD-K07609981	dexloxiglumide	MCF7	trt_cp	0.08 uM	24 h	2	407	0.5756	0.489427	0	0	1	1	0	CCK receptor antagonist	CCKAR	-0.6071	1.3419	-1.5771
CPC004_HA1E_6H:BRD-A29082194-001-02-4:10	BRD-A29082194	gitoxigenin	HA1E	trt_cp	10 uM	6 h	3	221	0.51	0.339478	1	1	1	1	0	Na/K-ATPase inhibitor	ATP1A1	-0.6071	1.3419	-1.5771
REP.A015_HA1E_24H:O13	BRD-K61250553	loperamide	HA1E	trt_cp	10 uM	24 h	3	205	0.4381	0.303036	1	1	1	1	0	Opioid receptor agonist	OPRM1|OPRD1|CYP2B6|CYP2C8|NPR2|CACNA1A|CALM1|OPRK1|POMC	-0.6071	1.3419	-1.5771
REP.A026_A375_24H:E22	BRD-K89348303	ramipril	A375	trt_cp	0.37 uM	24 h	3	145	0.1832	0.164808	0	0	1	1	0	ACE inhibitor	ACE	-0.6069	1.3419	-1.5766
REP.A018_THP1_24H:H07	BRD-K63828191	raloxifene	THP1	trt_cp	10 uM	24 h	2	130	0.1494	0.140922	0	0	1	1	0	Estrogen receptor antagonist|Selective estrogen receptor modulator (SERM)	ESR1|ESR2|ACVRL1|ENG	-0.6069	1.3419	-1.5765
REP.A022_HEK293_24H:I07	BRD-K71480163	GDC-0068	HEK293	trt_cp	10 uM	24 h	3	403	0.5965	0.495779	0	0	1	1	0	AKT inhibitor	AKT1|AKT2|AKT3|CYP3A5|PRKG1	-0.6068	1.3419	-1.5763
CPC011_A549_24H:BRD-A24191444-338-07-1:10	BRD-A24191444	ifenprodil	A549	trt_cp	10 uM	24 h	3	200	0.29	0.243526	1	0	1	1	0	Adrenergic receptor antagonist|Glutamate receptor antagonist	GRIN1|GRIN2B	-0.6067	1.3419	-1.5761
CPC001_HCC515_6H:BRD-A43974499-066-01-1:10	BRD-A43974499	reboxetine	HCC515	trt_cp	10 uM	6 h	2	439	0.47	0.459316	1	1	1	1	0	Adrenergic receptor antagonist	SLC6A2	-0.6067	1.3419	-1.5761
REP.A026_YAPC_24H:P22	BRD-A15931911	bucladesine	YAPC	trt_cp	0.37 uM	24 h	2	107	0.2212	0.155566	0	0	1	1	0	Adenosine receptor agonist|CAMP stimulant	PRKACA	-0.6066	1.3419	-1.5759
NMH002_NEU_6H:BRD-K77345217-001-04-3:10	BRD-K77345217	gallic-acid	NEU	trt_cp	10 uM	6 h	3	255	0.35	0.302089	0	0	1	1	0	PPAR receptor agonist|Beta amyloid inhibitor	CA1|APP|PPARG|CA12|CA14|CA2|CA4|CA6|CA9|SELP	-0.6066	1.3419	-1.5757
DOSVAL001_HEPG2_24H:BRD-K30867024:5	BRD-K30867024	SB-216641	HEPG2	trt_cp	4 uM	24 h	3	305	0.54	0.410372	1	1	1	1	0	Serotonin receptor antagonist	HTR1D|HTR1B|HTR1A|HTR2A|HTR2B|HTR2C	-0.6065	1.3419	-1.5755
CPC006_SW480_6H:BRD-K62810658-001-06-4:10	BRD-K62810658	PD-98059	SW480	trt_cp	10 uM	6 h	2	72	0.02	0.0383718	0	0	1	1	0	MEK inhibitor|MAP kinase inhibitor	MAP2K1|MAP2K2|MAPK3|AKT1|CHEK1|GSK3B|LCK|MAPK1|MAPK11|MAPK12|MAPK14|MAPK8|PRKCA|RAF1|ROCK1|RPS6KB1|SGK1	-0.6064	1.3419	-1.5753
REP.A005_MCF7_24H:H23	BRD-K09471561	levofloxacin	MCF7	trt_cp	0.125 uM	24 h	3	205	0.2093	0.209456	0	0	1	1	0	Bacterial DNA Gyrase inhibitor	TOP2A	-0.6063	1.3419	-1.5752
CPC018_ASC_24H:BRD-A56987319-001-02-0:10	BRD-A56987319	SQ-22536	ASC	trt_cp	10 uM	24 h	3	196	0.09	0.134301	0	0	1	1	0	Adenylyl cyclase inhibitor	ADCY5|ADCY1	-0.6064	1.3419	-1.5752
REP.A003_HELA_24H:I19	BRD-K34022604	clofarabine	HELA	trt_cp	10 uM	24 h	2	274	0.5801	0.403141	1	1	1	1	0	Ribonucleoside reductase inhibitor	RRM1|POLA1|RRM2|SLC22A8|POLD1|POLE|RRM2B	-0.6063	1.3419	-1.5751
CPC015_NPC_24H:BRD-K62200014-003-05-5:10	BRD-K62200014	anagrelide	NPC	trt_cp	10 uM	24 h	4	425	0.57	0.497694	0	0	1	1	0	Phosphodiesterase inhibitor	PDE3A	-0.6063	1.3419	-1.5751
CPC004_VCAP_6H:BRD-A54487287-001-03-9:10	BRD-A54487287	cortisone-acetate	VCAP	trt_cp	10 uM	6 h	4	93	0.09	0.092511	1	0	1	1	0	Glucocorticoid receptor agonist	NR3C1	-0.6063	1.3419	-1.575
REP.B023_HELA_24H:N03	BRD-K71799949	carbamazepine	HELA	trt_cp	0.25 uM	24 h	2	138	0.2217	0.17687	1	1	1	1	0	Carboxamide antiepileptic	SCN1A|SCN3A|SCN5A|ABCB1|CYP1A2|CYP3A4|SCN10A|SCN11A|SCN2A|SCN4A|SCN7A|SCN8A|SCN9A	-0.6063	1.3419	-1.5749
REP.A022_PC3_24H:P15	BRD-A82156122	saxagliptin	PC3	trt_cp	1.11 uM	24 h	2	100	0.1946	0.141059	1	1	1	1	0	Dipeptidyl peptidase inhibitor	DPP4|CYP3A5	-0.606	1.3419	-1.5743
CPD003_MCF7_6H:BRD-K91740057-001-14-9:10	BRD-K91740057	felbinac	MCF7	trt_cp	10 uM	6 h	2	165	0.35	0.243	0	0	1	1	0	Cyclooxygenase inhibitor	CTSL	-0.606	1.3419	-1.5743
CPC004_VCAP_6H:BRD-K47635719-001-03-9:10	BRD-K47635719	dexamethasone	VCAP	trt_cp	10 uM	6 h	3	75	0.22	0.129889	1	0	1	1	0	Glucocorticoid receptor agonist|Corticosteroid agonist|Cytochrome P450 inhibitor	NR3C1	-0.606	1.3419	-1.5742
CPC006_NCIH2073_6H:BRD-K04623885-001-03-4:80	BRD-K04623885	BIBR-1532	NCIH2073	trt_cp	80 uM	6 h	2	111	0.33	0.19353	0	0	1	1	0	Telomerase inhibitor	TERT	-0.6059	1.3419	-1.5739
LJP008_NEU_24H:B12	BRD-K92428232	GSK-461364	NEU	trt_cp	0.04 uM	24 h	2	262	0.4809	0.358929	0	0	1	1	0	PLK inhibitor	PLK1	-0.6058	1.3419	-1.5737
PBIOA018_A549_24H:A13	BRD-A10523515	GSK-429286A	A549	trt_cp	10 uM	24 h	3	172	0.3	0.229697	1	1	1	1	0	Rho associated kinase inhibitor	ROCK1	-0.6057	1.3419	-1.5736
REP.A026_YAPC_24H:O13	BRD-A65051990	acenocoumarol	YAPC	trt_cp	10 uM	24 h	2	168	0.1034	0.133274	0	0	1	1	0	Vitamin K antagonist	VKORC1	-0.6057	1.3419	-1.5735
REP.A015_JURKAT_24H:E08	BRD-K56844688	epirubicin	JURKAT	trt_cp	3.33 uM	24 h	2	711	0.7697	0.748042	0	0	1	1	0	Topoisomerase inhibitor	TOP2A|CHD1	-0.6057	1.3419	-1.5735
CPD001_PC3_24H:BRD-K02680176-075-08-7:10	BRD-K02680176	clofilium	PC3	trt_cp	10 uM	24 h	3	268	0.28	0.276998	1	1	1	1	0	Potassium channel antagonist	KCND2|KCNA5|KCNH1	-0.6055	1.3419	-1.573
REP.A013_HELA_24H:A09	BRD-K37289225	clozapine	HELA	trt_cp	1.11 uM	24 h	3	243	0.491	0.349281	0	0	1	1	0	Serotonin receptor antagonist|Dopamine receptor antagonist	DRD4|DRD2|DRD3|HTR2A|ADRA1A|ADRA1B|CHRM1|DRD1|HRH1|HRH4|HTR1A|HTR1B|HTR1D|HTR1E|HTR2C|HTR6|HTR7|CYP2C19|ADRA1D|ADRA2A|ADRA2B|ADRA2C|CALY|CHRM2|CHRM3|CHRM4|CHRM5|DRD5|HTR1F|HTR2B|HTR3A|HTR5A	-0.6054	1.3419	-1.5727
CPC002_VCAP_24H:BRD-K75641298-003-16-9:10	BRD-K75641298	metoclopramide	VCAP	trt_cp	10 uM	24 h	3	413	0.67	0.531916	1	1	1	1	0	Dopamine receptor antagonist|Serotonin receptor antagonist	DRD2|HTR4|HTR3A|CHRM1|HTR3B	-0.6053	1.3419	-1.5725
REP.A025_YAPC_24H:C01	BRD-K98624455	bepotastine	YAPC	trt_cp	10 uM	24 h	3	190	0.3949	0.276982	1	1	1	1	0	Histamine receptor antagonist	HRH1	-0.6052	1.3419	-1.5722
LJP006_HS578T_24H:M20	BRD-K19687926	lapatinib	HS578T	trt_cp	3.33 uM	24 h	3	71	0.41	0.172525	1	1	1	1	0	EGFR inhibitor|ERBB2 inhibitor	EGFR|ERBB2|CYP3A5	-0.605	1.3419	-1.5718
CPC001_VCAP_24H:B24	BRD-A39747742	BRD-A39747742	VCAP	trt_cp	10 uM	24 h	3	381	0.2454	0.309193	1	0	1	1	0	Estrogen receptor agonist	ESR1	-0.605	1.3419	-1.5718
CVD001_HUH7_24H:BRD-K46937689-001-05-1:2.6564	BRD-K46937689	phenazone	HUH7	trt_cp	2.5 uM	24 h	3	100	0.37	0.194505	0	0	1	1	0	Cyclooxygenase inhibitor	PTGS1|PTGS2	-0.605	1.3419	-1.5717
REP.B020_HA1E_24H:M24	BRD-K48578705	methyldopa	HA1E	trt_cp	0.01 uM	24 h	2	54	0.1587	0.0936086	1	1	1	1	0	Adrenergic receptor agonist	ADRA2A|DDC|ADRA2B|ADRA2C	-0.605	1.3419	-1.5716
CPC018_SKB_24H:BRD-K20755323-001-01-8:10	BRD-K20755323	SKI-II	SKB	trt_cp	10 uM	24 h	3	212	0.19	0.202944	0	0	1	1	0	Sphingosine kinase inhibitor	SPHK1|VCP	-0.6049	1.3419	-1.5715
CPC006_NCIH596_6H:BRD-A58955223-001-01-2:10	BRD-A58955223	sulforaphane	NCIH596	trt_cp	10 uM	6 h	2	95	0.18	0.13223	1	1	1	1	0	Carcinogen|Aryl hydrocarbon receptor antagonist	NFE2L2	-0.6049	1.3419	-1.5714
CPC016_HT29_6H:BRD-A78377521-001-03-0:10	BRD-A78377521	monastrol	HT29	trt_cp	10 uM	6 h	5	142	0.15	0.147578	1	0	1	1	0	Kinesin inhibitor	KIF11	-0.6049	1.3419	-1.5714
CPC006_NCIH596_6H:BRD-K30677119-001-01-0:11.1	BRD-K30677119	PP-30	NCIH596	trt_cp	12 uM	6 h	2	201	0.44	0.300715	1	1	1	1	0	RAF inhibitor	RAF1	-0.6049	1.3419	-1.5713
REP.A003_JURKAT_24H:C05	BRD-A31521121	methocarbamol	JURKAT	trt_cp	0.125 uM	24 h	2	411	0.8113	0.583905	0	0	1	1	0	Muscle relaxant	CA1	-0.6048	1.3419	-1.5712
CPC006_NOMO1_6H:BRD-K22134346-001-09-0:10	BRD-K22134346	simvastatin	NOMO1	trt_cp	10 uM	6 h	2	161	0.07	0.107348	0	0	1	1	0	HMGCR inhibitor	HMGCR|CYP2C8|CYP3A4|CYP3A5|ITGB2	-0.6047	1.3419	-1.571
CPC015_ASC_24H:BRD-K25224017-001-15-1:10	BRD-K25224017	pirenperone	ASC	trt_cp	10 uM	24 h	4	89	0.13	0.108767	0	0	1	1	0	Serotonin receptor antagonist	HTR2A|HTR7	-0.6048	1.3419	-1.571
CPC014_MCF7_6H:N16	BRD-K85985071	ellipticine	MCF7	trt_cp	10 uM	6 h	5	416	0.5029	0.462507	1	1	1	1	0	Topoisomerase inhibitor	TOP2A|TOP2B	-0.6047	1.3419	-1.5709
CPC018_A549_6H:BRD-K84595254-001-03-0:10	BRD-K84595254	strophanthidin	A549	trt_cp	10 uM	6 h	3	290	0.46	0.369325	1	1	1	1	0	Na/K-ATPase inhibitor	ATP1A1	-0.6047	1.3419	-1.5709
REP.B024_HEK293_24H:L08	BRD-K77947974	fluspirilene	HEK293	trt_cp	0.74 uM	24 h	2	100	0.1799	0.135627	0	0	1	1	0	Dopamine receptor antagonist	DRD2|HTR2A|CACNG1|HRH1|HTR1A|HTR1D|HTR1E	-0.6047	1.3419	-1.5708
REP.B010_HT29_24H:F01	BRD-A12896037	cisapride	HT29	trt_cp	2.22 uM	24 h	2	130	0.3428	0.213463	1	1	1	1	0	Serotonin receptor agonist	HTR4|KCNH2|CYP2B6|CYP2C8|CYP3A5|CYP3A7|HTR2A|HTR3A	-0.6046	1.3419	-1.5706
CPC017_ASC_24H:BRD-K52930707-001-04-8:10	BRD-K52930707	rescinnamine	ASC	trt_cp	10 uM	24 h	4	202	0.18	0.192816	0	0	1	1	0	ACE inhibitor	ACE	-0.6046	1.3419	-1.5706
REP.B027_YAPC_24H:L03	BRD-K93461745	buspirone	YAPC	trt_cp	0.25 uM	24 h	2	52	0.1056	0.0749315	1	0	1	1	0	Serotonin receptor agonist	HTR1A|DRD2	-0.6045	1.3419	-1.5704
REP.A020_MDAMB231_24H:A19	BRD-K83405785	pimavanserin	MDAMB231	trt_cp	10 uM	24 h	2	441	0.5668	0.505551	1	1	1	1	0	Serotonin receptor antagonist	HTR2A|DRD2	-0.6045	1.3419	-1.5704
CPC006_A549_24H:BRD-K56343971-001-02-3:10	BRD-K56343971	vemurafenib	A549	trt_cp	10 uM	24 h	3	101	0.41	0.205771	1	1	1	1	0	RAF inhibitor	BRAF|CYP2C19|CYP3A4|CYP3A5|RAF1	-0.6044	1.3419	-1.5702
CPC020_A375_6H:BRD-K53790871-001-15-1:10	BRD-K53790871	triamcinolone	A375	trt_cp	10 uM	6 h	5	432	0.33	0.381794	0	0	1	1	0	Glucocorticoid receptor agonist|Immunosuppressant	NR3C1|CYP3A5|CYP3A7	-0.6044	1.3418	-1.57
PAC004_U2OS_6H:BRD-K08132273-001-01-6:10	BRD-K08132273	tyrphostin	U2OS	trt_cp	10 uM	6 h	2	114	0.1	0.107965	1	0	1	1	0	EGFR inhibitor	ERBB2	-0.6044	1.3419	-1.57
CPC014_HA1E_6H:BRD-U33728988-000-01-6:10	BRD-U33728988	QL-X-138	HA1E	trt_cp	10 uM	6 h	3	356	0.47	0.413623	1	1	1	1	0	MTOR inhibitor	BTK|JAK3|MKNK2|MTOR|PRKDC	-0.6043	1.3417	-1.5699
REP.B016_HEK293_24H:B24	BRD-K51324732	meglitinide	HEK293	trt_cp	0.01 uM	24 h	2	230	0.1589	0.193311	0	0	1	1	0	Potassium channel antagonist	ABCC8|KCNJ11|CCR2	-0.6042	1.3417	-1.5697
CPC014_HCC515_6H:BRD-K48722833-001-01-9:10	BRD-K48722833	iloperidone	HCC515	trt_cp	10 uM	6 h	3	225	0.38	0.295674	1	1	1	1	0	Dopamine receptor antagonist|Serotonin receptor antagonist	DRD2|HTR2A|HTR1A|HTR6|HTR7|ADRA1A|ADRA2C|DRD1|DRD3|DRD4|HRH1	-0.6042	1.3411	-1.5695
CPC014_A375_6H:H02	BRD-K58772419	AZD-6482	A375	trt_cp	10 uM	6 h	2	113	0.3512	0.201441	1	1	1	1	0	PI3K inhibitor	PIK3CB|PIK3CD|PIK3CG|PIK3CA	-0.6041	1.3407	-1.5694
CPC017_A549_6H:BRD-A99177642-001-02-5:10	BRD-A99177642	deltaline	A549	trt_cp	10 uM	6 h	3	59	0.09	0.0736848	1	0	1	1	0	Acetylcholine receptor antagonist	CHRNA7	-0.6041	1.3409	-1.5694
CPC013_ASC_24H:BRD-K11636097-001-01-5:10	BRD-K11636097	JNJ-7706621	ASC	trt_cp	10 uM	24 h	4	685	0.71	0.705188	0	0	1	1	0	CDK inhibitor	CDK1|CDK2|AURKA|AURKB	-0.6041	1.3409	-1.5694
CPC016_MCF7_24H:BRD-K82823076-001-01-8:10	BRD-K82823076	Ro-15-4513	MCF7	trt_cp	10 uM	24 h	4	106	0.17	0.13574	1	0	1	1	0	GABA receptor agonist	GABRA1|GABRA2|GABRA3|GABRA5|GABRA4|GABRA6|GABRB2|GABRG2	-0.604	1.3397	-1.5691
CPC016_A549_24H:BRD-K36737713-001-01-6:10	BRD-K36737713	AG-957	A549	trt_cp	10 uM	24 h	3	153	0.21	0.181253	0	0	1	1	0	Protein tyrosine kinase inhibitor	ABL1|EGFR	-0.604	1.3397	-1.5691
REP.A028_MDAMB231_24H:J10	BRD-K95237249	probenecid	MDAMB231	trt_cp	0.37 uM	24 h	3	141	0.1536	0.148811	0	0	1	1	0	Uricosuric	SLC22A6|SLC22A11|SLC22A8|ABCC1|TRPV2|PANX1|SLCO1C1	-0.604	1.3398	-1.5691
REP.B020_JURKAT_24H:N19	BRD-K48722258	dilazep	JURKAT	trt_cp	2.22 uM	24 h	2	169	0.02	0.058788	0	0	1	1	0	Adenosine receptor antagonist	SLC29A1|CACNA1C	-0.604	1.3399	-1.5691
CPC017_ASC_24H:BRD-K37289225-001-19-0:10	BRD-K37289225	clozapine	ASC	trt_cp	10 uM	24 h	4	161	0.24	0.198769	1	0	1	1	0	Serotonin receptor antagonist|Dopamine receptor antagonist	DRD4|DRD2|DRD3|HTR2A|ADRA1A|ADRA1B|CHRM1|DRD1|HRH1|HRH4|HTR1A|HTR1B|HTR1D|HTR1E|HTR2C|HTR6|HTR7|CYP2C19|ADRA1D|ADRA2A|ADRA2B|ADRA2C|CALY|CHRM2|CHRM3|CHRM4|CHRM5|DRD5|HTR1F|HTR2B|HTR3A|HTR5A	-0.604	1.3394	-1.569
CPC017_NPC_24H:BRD-A38913120-001-01-0:10	BRD-A38913120	BH3I-1	NPC	trt_cp	10 uM	24 h	4	209	0.21	0.211843	0	0	1	1	0	BCL inhibitor	BCL2L1	-0.6039	1.3383	-1.5688
CPC014_SKB_24H:BRD-K55420858-001-01-0:10	BRD-K55420858	mirin	SKB	trt_cp	10 uM	24 h	4	131	0.23	0.175521	0	0	1	1	0	MRE11A exonuclease inhibitor	MRE11A	-0.6039	1.3384	-1.5688
REP.B028_HA1E_24H:C17	BRD-K92984783	melperone	HA1E	trt_cp	0.03 uM	24 h	2	94	0.2141	0.143451	1	1	1	1	0	Dopamine receptor antagonist|Serotonin receptor antagonist	DRD2|HTR1A|HTR2A	-0.6038	1.3097	-1.5685
REP.A017_PC3_24H:P01	BRD-K63861289	molsidomine	PC3	trt_cp	10 uM	24 h	3	300	0.478	0.382917	1	1	1	1	0	Guanylyl cyclase activator	GUCY1A3	-0.6037	1.3045	-1.5682
CPC016_SKB_24H:BRD-K81209512-001-01-3:10	BRD-K81209512	AG-494	SKB	trt_cp	10 uM	24 h	3	162	0.24	0.199386	1	0	1	1	0	EGFR inhibitor|Tyrosine kinase inhibitor	EGFR	-0.6036	1.3034	-1.5681
CPC001_PC3_24H:N01	BRD-A44551378	LFM-A12	PC3	trt_cp	10 uM	24 h	4	453	0.3705	0.414261	1	1	1	1	0	EGFR inhibitor	EGFR	-0.6036	1.3035	-1.5681
REP.A003_JURKAT_24H:B18	BRD-K31309378	lucitanib	JURKAT	trt_cp	0.04 uM	24 h	2	169	0.3391	0.242068	0	0	1	1	0	FGFR inhibitor|VEGFR inhibitor	FGFR1|FLT1|KDR|FGFR2|FLT4|CSF1R|KIT|PDGFRA|PDGFRB|RET	-0.6036	1.3028	-1.568
CPC015_A549_24H:BRD-K52075715-001-03-4:10	BRD-K52075715	oxibendazole	A549	trt_cp	10 uM	24 h	2	204	0.26	0.23288	0	0	1	1	0	Tubulin inhibitor	TUBB|TUBB4B	-0.6036	1.3028	-1.568
CPC011_A375_6H:BRD-K09963420-066-10-9:10	BRD-K09963420	saquinavir	A375	trt_cp	10 uM	6 h	3	473	0.27	0.361362	0	0	1	1	0	HIV inhibitor	CYP3A5|CYP3A4	-0.6036	1.3031	-1.568
REP.A003_A375_24H:C01	BRD-A31521121	methocarbamol	A375	trt_cp	10 uM	24 h	3	239	0.3819	0.305495	1	1	1	1	0	Muscle relaxant	CA1	-0.6035	1.3019	-1.5678
REP.A025_JURKAT_24H:P01	BRD-K79131256	albendazole	JURKAT	trt_cp	10 uM	24 h	2	526	0.5355	0.536665	0	0	1	1	0	Tubulin inhibitor	CYP1A2|CYP2J2|TUBA1A|TUBB|TUBB4B	-0.6035	1.3019	-1.5678
CPC014_A549_24H:BRD-K31484631-001-05-0:10	BRD-K31484631	rifabutin	A549	trt_cp	10 uM	24 h	3	61	0.29	0.134491	0	0	1	1	0	Protein synthesis inhibitor	CYP3A4|HSP90AA1|HSP90B1	-0.6035	1.3022	-1.5678
CPC015_ASC_24H:BRD-A49160188-003-04-4:10	BRD-A49160188	donepezil	ASC	trt_cp	10 uM	24 h	4	171	0.12	0.14485	0	0	1	1	0	Acetylcholinesterase inhibitor	ACHE|HTR2A	-0.6033	1.3004	-1.5671
CPC005_PC3_6H:BRD-A09925278-003-03-1:10	BRD-A09925278	etilefrine	PC3	trt_cp	10 uM	6 h	4	175	0.17	0.174411	1	1	1	1	0	Adrenergic receptor agonist	ADRA1A|ADRB1	-0.6032	1.3001	-1.567
NMH002_NEU_6H:BRD-K71879491-001-30-9:10	BRD-K71879491	tretinoin	NEU	trt_cp	10 uM	6 h	3	376	0.4	0.392152	0	0	1	1	0	Retinoid receptor agonist|Retinoid receptor ligand	RARG|RORB|RARA|RARB|ALDH1A1|ALDH1A2|GPRC5A|NR0B1|NR2C2|PPARD|RARRES1|RORC|RXRB|RXRG	-0.6031	1.2999	-1.5668
REP.A012_MDAMB231_24H:H04	BRD-K01621533	acarbose	MDAMB231	trt_cp	0.37 uM	24 h	2	89	0.0769	0.0836544	0	0	1	1	0	Glucosidase inhibitor	GAA|MGAM|AMY2A|SI	-0.6031	1.2999	-1.5668
CPC017_ASC_24H:BRD-K72541103-001-01-5:10	BRD-K72541103	BRD-K72541103	ASC	trt_cp	10 uM	24 h	4	204	0.22	0.214219	1	0	1	1	0	JAK inhibitor	JAK3	-0.6031	1.2999	-1.5668
CPC016_A549_6H:BRD-K79425933-001-03-6:10	BRD-K79425933	benperidol	A549	trt_cp	10 uM	6 h	2	78	0.22	0.132461	0	0	1	1	0	Dopamine receptor antagonist	DRD2	-0.6031	1.2999	-1.5667
PAC003_U2OS_6H:BRD-K20714604-001-01-5:10	BRD-K20714604	RS-56812	U2OS	trt_cp	10 uM	6 h	2	135	0.21	0.170258	1	0	1	1	0	Serotonin receptor agonist	HTR3A	-0.6031	1.2999	-1.5667
REP.B007_HT29_24H:H11	BRD-A51382177	fosinopril	HT29	trt_cp	0.03 uM	24 h	2	557	0.4435	0.50258	0	0	1	1	0	ACE inhibitor	ACE|ABCG2	-0.6031	1.2999	-1.5666
CPC016_SKB_24H:BRD-K62996583-001-03-8:10	BRD-K62996583	lidoflazine	SKB	trt_cp	10 uM	24 h	3	217	0.36	0.282626	1	1	1	1	0	Calcium channel blocker	SCN1A|SCN3A|SLC29A1	-0.603	1.2999	-1.5664
CPC003_PC3_24H:BRD-A42167015-003-03-7:10	BRD-A42167015	carteolol	PC3	trt_cp	10 uM	24 h	5	505	0.06	0.176016	0	0	1	1	0	Adrenergic receptor antagonist	ADRB1|ADRB2	-0.6029	1.2999	-1.5661
CPC003_VCAP_6H:BRD-A48570745-001-01-1:10	BRD-A48570745	ivermectin	VCAP	trt_cp	10 uM	6 h	5	308	0.07	0.148476	1	0	1	1	0	GABA receptor agonist	CHRNA7|GABRB3|GLRA3|P2RX7	-0.6029	1.2999	-1.5661
PBIOA016_A375_24H:M01	BRD-K68532323	SB-743921	A375	trt_cp	10 uM	24 h	2	637	0.7317	0.690346	1	1	1	1	0	Kinesin inhibitor	KIF11	-0.6027	1.2999	-1.5656
CPC010_VCAP_6H:BRD-K73589401-001-20-2:10	BRD-K73589401	BRD-K73589401	VCAP	trt_cp	10 uM	6 h	5	172	0.26	0.213836	1	1	1	1	0	Mineralocorticoid receptor agonist	HSD11B1|NR3C2|NCOA1	-0.6025	1.2999	-1.5653
REP.B024_MDAMB231_24H:G01	BRD-K75699339	rizatriptan	MDAMB231	trt_cp	2.22 uM	24 h	2	227	0.3793	0.296712	0	0	1	1	0	Serotonin receptor agonist	HTR1D|HTR1B|HTR1F|HTR1A|HTR1E	-0.6023	1.2999	-1.5647
CPC016_NEU_24H:BRD-K88677950-001-01-3:10	BRD-K88677950	PD-198306	NEU	trt_cp	10 uM	24 h	3	138	0.2	0.167991	0	0	1	1	0	MAP kinase inhibitor|MEK inhibitor	MAPK1|MAPK3|MAP2K1|MAP2K2	-0.6023	1.2999	-1.5646
LIVB002_HUH7_72H:E23	BRD-K70401845	erlotinib	HUH7	trt_cp	1.11 uM	72 h	3	391	0.54	0.464639	0	0	1	1	0	EGFR inhibitor	EGFR|NR1I2	-0.6023	1.2999	-1.5645
REP.A022_MDAMB231_24H:I16	BRD-K72222507	quinapril	MDAMB231	trt_cp	0.37 uM	24 h	3	188	0.1859	0.189038	0	0	1	1	0	ACE inhibitor	ACE	-0.6022	1.2999	-1.5644
REP.B014_HA1E_24H:B07	BRD-A55962179	omeprazole	HA1E	trt_cp	2.22 uM	24 h	2	97	0.2032	0.141964	1	1	1	1	0	Proton pump inhibitor	ATP4A|CYP1A2|CYP2C19|CLCN2	-0.6022	1.2999	-1.5644
REP.B016_MCF10A_24H:L11	BRD-K54936858	DMP-777	MCF10A	trt_cp	0.03 uM	24 h	2	39	0.1547	0.0785431	1	0	1	1	0	Elastase inhibitor	MPO|PI3	-0.6021	1.2999	-1.564
REP.A013_PC3_24H:I24	BRD-A41451487	PK-11195	PC3	trt_cp	0.04 uM	24 h	2	182	0.2878	0.231426	1	1	1	1	0	Benzodiazepine receptor antagonist	TSPO|NR1I2|NR1I3	-0.602	1.2999	-1.5639
REP.A003_A375_24H:L12	BRD-K34469523	levalbuterol	A375	trt_cp	0.04 uM	24 h	3	89	0.0783	0.0844124	1	1	1	1	0	Adrenergic receptor agonist	ADRB2	-0.6019	1.2999	-1.5637
REP.B008_MCF10A_24H:I07	BRD-K91290917	amodiaquine	MCF10A	trt_cp	2.22 uM	24 h	2	98	0.1414	0.119033	0	0	1	1	0	Histamine receptor agonist	HNMT|CYP2C8	-0.6019	1.2999	-1.5637
CPC006_NCIH596_6H:BRD-K82818427-001-01-4:44.4	BRD-K82818427	batimastat	NCIH596	trt_cp	40 uM	6 h	2	62	0.04	0.0503566	1	0	1	1	0	Matrix metalloprotease inhibitor	MMP1|ADAM28|ADAMTS5|MMP12|MMP16|MMP2|MMP8	-0.6019	1.2999	-1.5636
NMH002_NPC_24H:BRD-K64994968-001-24-2:10	BRD-K64994968	progesterone	NPC	trt_cp	10 uM	24 h	3	262	0.55	0.383851	0	0	1	1	0	Progesterone receptor agonist	PGR|CYP17A1|NR3C2|CYP2C19|CATSPER1|CATSPER2|CATSPER3|CATSPER4|ESR1|OPRK1|TRPC5	-0.6019	1.2999	-1.5636
REP.A016_HELA_24H:G02	BRD-K53061490	ozagrel	HELA	trt_cp	3.33 uM	24 h	3	342	0.5012	0.418648	1	1	1	1	0	Thromboxane synthase inhibitor	TBXAS1	-0.6016	1.2999	-1.5629
RAD001_PC3_6H:BRD-K57569181-001-16-8:0.0137	BRD-K57569181	pentoxifylline	PC3	trt_cp	0.01 uM	6 h	2	318	0.04	0.114044	0	0	1	1	0	Phosphodiesterase inhibitor	TNF|ADORA2A|PDE4A|PDE4B|PDE5A|ACHE|CHIA|ADORA1|ADORA2B|ADRA2B|NT5E|PDE10A|PDE1A|PDE1B|PDE1C|PDE2A|PDE3A|PDE3B|PDE4C|PDE4D|PDE6A|PDE6B|PDE6C|PDE6D|PDE6G|PDE6H|PDE7A|PDE7B|PDE8A|PDE8B|PDE9A	-0.6015	1.2999	-1.5626
CPC013_HCC515_6H:BRD-K31553034-001-01-4:10	BRD-K31553034	zibotentan	HCC515	trt_cp	10 uM	6 h	3	255	0.24	0.250153	0	0	1	1	0	Endothelin receptor antagonist	EDNRA	-0.6015	1.2999	-1.5625
CPC015_SKB_24H:BRD-K82941592-238-02-9:10	BRD-K82941592	rosuvastatin	SKB	trt_cp	10 uM	24 h	2	80	0.11	0.0948576	0	0	1	1	0	HMGCR inhibitor	HMGCR	-0.6014	1.2999	-1.5624
REP.A028_PC3_24H:E12	BRD-K93460210	lamotrigine	PC3	trt_cp	0.04 uM	24 h	2	211	0.1771	0.19547	0	0	1	1	0	Serotonin receptor antagonist|Sodium channel inhibitor	SCN1A|SCN3A|SCN2A|SCN10A|SCN11A|SCN4A|SCN5A|SCN7A|SCN8A|SCN9A	-0.6014	1.2999	-1.5624
REP.A001_HT29_24H:G23	BRD-K28183345	proguanil	HT29	trt_cp	0.125 uM	24 h	3	156	0.2451	0.197726	0	0	1	1	0	Dihydrofolate reductase inhibitor	CYP2C19|DHFR	-0.6013	1.2999	-1.5621
MOAR015_HAP1.CDK4_24H:G04	BRD-K13390322	AT-7519	HAP1	trt_cp	0.66 uM	24 h	3	252	0.5584	0.379318	1	1	1	1	0	CDK inhibitor|Cell cycle inhibitor	CDK2|CDK1|CDK9|CDK4|CDK5|CDK6	-0.6012	1.2999	-1.5619
REP.B020_MDAMB231_24H:H22	BRD-K82928847	ACY-1215	MDAMB231	trt_cp	0.08 uM	24 h	2	130	0.1801	0.154725	0	0	1	1	0	HDAC inhibitor	HDAC6|HDAC1|HDAC2|HDAC3|HDAC8	-0.6012	1.2999	-1.5619
CPC006_U937_6H:BRD-K06593056-001-02-2:20	BRD-K06593056	LE-135	U937	trt_cp	20 uM	6 h	2	138	0.56	0.281102	1	1	1	1	0	Retinoid receptor agonist	RARB	-0.6013	1.2999	-1.5619
REP.A013_HT29_24H:O19	BRD-K44309363	dexniguldipine	HT29	trt_cp	10 uM	24 h	3	560	0.6413	0.605976	0	0	1	1	0	Calmodulin inhibitor	CALM1|PRKCA|ADORA3	-0.6011	1.2999	-1.5615
REP.B008_PC3_24H:K01	BRD-K90239174	AMG-487	PC3	trt_cp	2.22 uM	24 h	2	85	0.2292	0.141139	0	0	1	1	0	CC chemokine receptor antagonist	CXCR3	-0.6011	1.2999	-1.5615
REP.A004_HEK293_24H:L18	BRD-K20920669	cromoglicic-acid	HEK293	trt_cp	0.04 uM	24 h	3	94	0.294	0.1681	0	0	1	1	0	Immunosuppressant	KCNMA1|S100P	-0.6011	1.2999	-1.5614
CPC009_VCAP_6H:BRD-K02637541-001-12-3:10	BRD-K02637541	celecoxib	VCAP	trt_cp	10 uM	6 h	4	291	0.27	0.283439	1	0	1	1	0	Cyclooxygenase inhibitor	PTGS2|CASP3|CYP2C19|CA12|PDPK1	-0.601	1.2998	-1.5612
LPROT001_PC3_6H:BRD-K87124298:2	BRD-K87124298	OSI-027	PC3	trt_cp	2.22 uM	6 h	3	224	0.44	0.317454	1	1	1	1	0	MTOR inhibitor	MTOR	-0.6009	1.2998	-1.5611
CPC006_AGS_6H:BRD-K21672174-001-02-2:160	BRD-K21672174	Ro-28-1675	AGS	trt_cp	150 uM	6 h	2	188	0.48	0.30376	1	1	1	1	0	Glucokinase activator	GCK	-0.6009	1.2997	-1.561
LJP009_HELA_24H:M24	BRD-K56277358	MGCD-265	HELA	trt_cp	0.04 uM	24 h	3	149	0.2727	0.203829	1	0	1	1	0	VEGFR inhibitor	MET|KDR|AXL	-0.6008	1.2995	-1.5609
CPC007_HCC515_6H:BRD-A82096673-001-04-4:10	BRD-A82096673	KU-C103428N	HCC515	trt_cp	10 uM	6 h	2	162	0.27	0.21148	0	0	1	1	0	CDC inhibitor|Rho associated kinase inhibitor	NFE2	-0.6008	1.2991	-1.5607
CPC001_HCC515_6H:BRD-K62206109-303-01-1:10	BRD-K62206109	VUF-5681	HCC515	trt_cp	10 uM	6 h	2	91	0.03	0.0528338	1	0	1	1	0	Histamine receptor antagonist	HRH3	-0.6008	1.2991	-1.5607
CPC008_PC3_24H:BRD-A12633378-001-05-4:10	BRD-A12633378	ML-213	PC3	trt_cp	10 uM	24 h	5	518	0.22	0.341355	0	0	1	1	0	Potassium channel activator	KCNQ4|KCNQ2	-0.6008	1.2991	-1.5607
REP.A025_YAPC_24H:I07	BRD-K74717603	etravirine	YAPC	trt_cp	10 uM	24 h	3	577	0.7553	0.667541	1	1	1	1	0	Non-nucleoside reverse transcriptase inhibitor	CYP2C19|CYP3A4|CYP2C9	-0.6007	1.2985	-1.5605
CPC017_HEPG2_6H:BRD-K58938839-001-03-8:10	BRD-K58938839	cyclopamine	HEPG2	trt_cp	10 uM	6 h	3	137	0.41	0.239653	1	0	1	1	0	Smoothened receptor antagonist	SMO	-0.6007	1.2987	-1.5605
CPC011_MCF7_24H:BRD-K55696337-003-16-0:10	BRD-K55696337	topotecan	MCF7	trt_cp	10 uM	24 h	2	520	0.61	0.569505	0	0	1	1	0	Topoisomerase inhibitor	TOP1|TOP1MT	-0.6007	1.2983	-1.5604
CPC012_ASC_24H:BRD-K74761218-001-03-5:10	BRD-K74761218	WT-171	ASC	trt_cp	10 uM	24 h	4	270	0.34	0.306374	1	1	1	1	0	HDAC inhibitor	HDAC6	-0.6006	1.2978	-1.5603
CPC018_HT29_6H:BRD-K06234293-001-01-8:10	BRD-K06234293	LY-364947	HT29	trt_cp	10 uM	6 h	5	317	0.29	0.306591	1	0	1	1	0	TGF-beta receptor inhibitor|P38 MAPK inhibitor	TGFBR1	-0.6006	1.2967	-1.5602
MOAR001_PC3_24H:M24	BRD-A01907367	FK-33-824	PC3	trt_cp	1.11 uM	24 h	3	165	0.3	0.224974	1	0	1	1	0	Opioid receptor agonist	OGFR|OPRM1	-0.6005	1.2891	-1.56
LJP002_MDAMB231_24H:BRD-K44227013-001-01-5:10	BRD-K44227013	ponatinib	MDAMB231	trt_cp	10 uM	24 h	3	435	0.57	0.503515	0	0	1	1	0	Bcr-Abl inhibitor|FLT3 inhibitor|PDGFR inhibitor	ABL1|BCR|FLT3|RET|FGFR1|FGFR2|FGFR3|FGFR4|KIT|TEK|CYP2C8|CYP3A5|FGF2|FLT1|KDR|LCK|LYN|PDGFRA|SRC	-0.6005	1.2892	-1.56
REP.B025_HELA_24H:L21	BRD-K77641333	naphazoline	HELA	trt_cp	0.25 uM	24 h	2	109	0.1912	0.145978	1	1	1	1	0	Adrenergic receptor agonist	ADRA1A|ADRA2A	-0.6005	1.279	-1.5599
CPC006_HEPG2_6H:BRD-A26711594-003-06-4:10	BRD-A26711594	nicardipine	HEPG2	trt_cp	10 uM	6 h	3	86	0.22	0.139088	1	0	1	1	0	Calcium channel blocker	CACNA1C|ADORA3|ADRA1A|ADRA1B|ADRA1D|CACNA1D|CACNA2D1|CACNB2|CALM1|CHRM1|CHRM2|CHRM3|CHRM4|CHRM5|PDE1A|PDE1B	-0.6003	1.2778	-1.5595
REP.A028_YAPC_24H:H07	BRD-A94276798	talinolol	YAPC	trt_cp	10 uM	24 h	2	119	0.0949	0.107458	0	0	1	1	0	Adrenergic receptor antagonist	ADRB1	-0.6003	1.2778	-1.5595
CPC018_A549_24H:BRD-K33308633-001-01-6:10	BRD-K33308633	INCA-6	A549	trt_cp	10 uM	24 h	2	80	0.24	0.140114	0	0	1	1	0	Calcineurin inhibitor	NFATC1	-0.6003	1.2778	-1.5594
CPC016_NPC_24H:BRD-A85587465-001-02-5:10	BRD-A85587465	bemesetron	NPC	trt_cp	10 uM	24 h	4	428	0.21	0.303153	0	0	1	1	0	Serotonin receptor antagonist	HTR3A|HTR3B	-0.6002	1.2778	-1.5592
CPC016_NPC_24H:BRD-K28115081-001-01-9:10	BRD-K28115081	apafant	NPC	trt_cp	10 uM	24 h	4	100	0.08	0.0904431	0	0	1	1	0	Platelet activating factor receptor antagonist	PTAFR	-0.6001	1.2778	-1.559
MOAR007_A375_24H:L15	BRD-K60160658	tiagabine	A375	trt_cp	1.11 uM	24 h	3	151	0.26	0.200358	1	0	1	1	0	GABA receptor antagonist	SLC6A1|CYP2C19	-0.6001	1.2778	-1.5588
CPC003_PC3_24H:BRD-K67537649-001-01-1:10	BRD-K67537649	PQ-401	PC3	trt_cp	10 uM	24 h	5	494	0.31	0.395708	0	0	1	1	0	IGF-1 inhibitor	IGF1R	-0.6	1.2778	-1.5586
REP.B027_HT29_24H:H01	BRD-K95880107	PH-797804	HT29	trt_cp	2.22 uM	24 h	2	112	0.3093	0.188204	1	1	1	1	0	P38 MAPK inhibitor	MAPK14|MAPK11	-0.5999	1.2778	-1.5585
CPC017_ASC_24H:BRD-K45068323-003-02-1:10	BRD-K45068323	W-13	ASC	trt_cp	10 uM	24 h	4	69	0.15	0.102873	1	0	1	1	0	Calmodulin inhibitor	CALM1|MYLK|PDE1A	-0.5999	1.2778	-1.5584
CPC016_NPC_24H:BRD-K63504947-001-05-5:10	BRD-K63504947	semaxanib	NPC	trt_cp	10 uM	24 h	3	263	0.29	0.279259	0	0	1	1	0	VEGFR inhibitor	KDR|FLT1|KIT|PDGFRB|FLT3|MET|FGFR1|PDGFRA|RET	-0.5998	1.2778	-1.5582
CPC015_ASC_24H:BRD-K04548931-003-05-8:10	BRD-K04548931	epirubicin	ASC	trt_cp	10 uM	24 h	3	551	0.56	0.561695	0	0	1	1	0	Topoisomerase inhibitor	TOP2A|CHD1	-0.5998	1.2778	-1.5582
CPC017_NPC_24H:BRD-A59943784-001-01-8:10	BRD-A59943784	fluticasone	NPC	trt_cp	10 uM	24 h	4	357	0.39	0.377309	0	0	1	1	0	Glucocorticoid receptor agonist	NR3C1|PGR	-0.5997	1.2778	-1.5579
CPC001_HA1E_6H:BRD-K94176593-001-02-9:10	BRD-K94176593	TWS-119	HA1E	trt_cp	10 uM	6 h	3	348	0.44	0.395682	1	1	1	1	0	GSK inhibitor	GSK3B|JUN|MYC	-0.5997	1.2778	-1.5579
CPC006_A375_24H:BRD-K90999434-003-01-9:10	BRD-K90999434	CCT-031374	A375	trt_cp	10 uM	24 h	5	353	0.51	0.429045	1	1	1	1	0	WNT inhibitor	CTNNB1	-0.5997	1.2778	-1.5578
CPC013_ASC_24H:BRD-K66175015-001-01-7:10	BRD-K66175015	afatinib	ASC	trt_cp	10 uM	24 h	4	261	0.46	0.350372	0	0	1	1	0	EGFR inhibitor	EGFR|ERBB2|ERBB4	-0.5996	1.2778	-1.5576
LIVB001_HUH7_72H:I09	BRD-A41304429	practolol	HUH7	trt_cp	12.5 uM	72 h	3	210	0.06	0.113505	0	0	1	1	0	Adrenergic receptor antagonist	ADRB1	-0.5996	1.2778	-1.5576
REP.B013_MCF10A_24H:F21	BRD-M39350793	reboxetine	MCF10A	trt_cp	0.25 uM	24 h	2	43	0.198	0.0933034	1	0	1	1	0	Adrenergic receptor antagonist	SLC6A2	-0.5996	1.2778	-1.5575
CPC018_SKB_24H:BRD-K61250553-003-16-5:10	BRD-K61250553	loperamide	SKB	trt_cp	10 uM	24 h	3	218	0.35	0.279314	0	0	1	1	0	Opioid receptor agonist	OPRM1|OPRD1|CYP2B6|CYP2C8|NPR2|CACNA1A|CALM1|OPRK1|POMC	-0.5995	1.2778	-1.5574
LJP001_MDAMB231_24H:BRD-K24859147-379-02-6:10	BRD-K24859147	KIN001-242	MDAMB231	trt_cp	10 uM	24 h	4	197	0.33	0.257822	1	1	1	1	0	Protein kinase inhibitor	RPS6KA3	-0.5994	1.2777	-1.5572
LUNG001_A549_24H:BRD-K37720887:10	BRD-K37720887	SB-525334	A549	trt_cp	10 uM	24 h	2	149	0.2998	0.213717	1	1	1	1	0	TGF-beta receptor inhibitor	TGFBR1	-0.5994	1.2777	-1.5571
CPC020_HT29_6H:BRD-A99833829-003-21-4:10	BRD-A99833829	bethanechol	HT29	trt_cp	10 uM	6 h	4	338	0.44	0.389956	1	0	1	1	0	Acetylcholine receptor agonist	CHRM2|CHRM1|CHRM3|CHRM4	-0.5993	1.2775	-1.5569
REP.A020_MDAMB231_24H:D13	BRD-K84986517	darunavir	MDAMB231	trt_cp	10 uM	24 h	2	113	0.099	0.106952	0	0	1	1	0	HIV inhibitor	CYP3A4|CYP3A5	-0.5993	1.2775	-1.5569
LUNG001_A549_24H:BRD-K22429181:10	BRD-K22429181	retinol	A549	trt_cp	10 uM	24 h	2	165	0.0902	0.12336	1	0	1	1	0	Retinoid receptor agonist	ALDH1A1|ALDH1A2|ALDH1A3|DHRS3|DHRS4|LRAT|NR2C2|RBP1|RBP3|RDH11|RDH12|RDH13|RDH14|RDH5|RDH8|RETSAT|RHO|RLBP1|RXRA|RXRB|RXRG	-0.5993	1.2775	-1.5569
REP.A024_HELA_24H:M01	BRD-A78341343	regadenoson	HELA	trt_cp	10 uM	24 h	3	97	0.1565	0.124587	1	0	1	1	0	Adenosine receptor agonist	ADORA2A|ADORA1|ADORA2B|ADORA3	-0.5993	1.2775	-1.5568
CPD002_MCF7_6H:BRD-A10662413-043-06-2:10	BRD-A10662413	prenylamine	MCF7	trt_cp	10 uM	6 h	3	427	0.5	0.467229	0	0	1	1	0	Calcium channel blocker	CALM1|MYLK2	-0.5993	1.2775	-1.5568
LJP001_SKBR3_6H:BRD-K49328571-001-06-9:10	BRD-K49328571	dasatinib	SKBR3	trt_cp	10 uM	6 h	4	158	0.38	0.247771	1	1	1	1	0	KIT inhibitor|Bcr-Abl inhibitor|Ephrin inhibitor|PDGFR inhibitor|Src inhibitor|Tyrosine kinase inhibitor	ABL1|FYN|LCK|SRC|KIT|YES1|EPHA2|LYN|PDGFRB|BCR|BTK|DDR1|DDR2|PDGFRA|ABL2|BLK|FGR|FRK|HCK|SRMS|STAT5B	-0.5992	1.2775	-1.5566
AICHI002_KMS34_24H:L13	BRD-K78431006	crizotinib	KMS34	trt_cp	10 uM	24 h	3	642	0.72	0.687487	1	1	1	1	0	ALK inhibitor	ALK|MET|CYP2B6|CYP3A5|MST1R|ROS1	-0.5992	1.2775	-1.5565
CPC003_HCC515_24H:BRD-A99449986-001-01-4:10	BRD-A99449986	MT-21	HCC515	trt_cp	10 uM	24 h	3	235	0.41	0.313875	1	1	1	1	0	Caspase activator	CYCS	-0.5992	1.2775	-1.5565
CPC011_A375_6H:BRD-K99447003-001-04-9:10	BRD-K99447003	enalaprilat	A375	trt_cp	10 uM	6 h	3	496	0.21	0.326348	1	0	1	1	0	ACE inhibitor	ACE	-0.5992	1.2775	-1.5565
CPC010_HA1E_6H:BRD-K70578146-001-03-4:10	BRD-K70578146	dactinomycin	HA1E	trt_cp	10 uM	6 h	3	415	0.37	0.396237	1	1	1	1	0	RNA polymerase inhibitor	POLR2A	-0.5991	1.2775	-1.5564
CPC014_A549_24H:BRD-K85402309-001-01-7:10	BRD-K85402309	dovitinib	A549	trt_cp	10 uM	24 h	3	530	0.35	0.435514	0	0	1	1	0	EGFR inhibitor|FGFR inhibitor|FLT3 inhibitor|PDGFR inhibitor|VEGFR inhibitor	FGFR1|FLT1|KDR|EGFR|FGFR3|FLT3|FLT4|KIT|PDGFRB|CSF1R|FGFR2|INSR|PDGFRA	-0.5991	1.2775	-1.5563
REP.A014_MCF10A_24H:H06	BRD-K59506194	targinine	MCF10A	trt_cp	0.04 uM	24 h	3	157	0.205	0.181408	0	0	1	1	0	Nitric oxide synthase inhibitor	NOS2|NOS3	-0.5989	1.2775	-1.5559
REP.B025_THP1_24H:A18	BRD-K97746869	chlorpropamide	THP1	trt_cp	0.01 uM	24 h	2	110	0.1227	0.117476	0	0	1	1	0	ATP channel blocker	ABCC8|KCNJ10|KCNJ11	-0.5989	1.2775	-1.5559
REP.A023_A375_24H:L03	BRD-A70998768	pinaverium	A375	trt_cp	1.11 uM	24 h	3	80	0.1402	0.10709	1	1	1	1	0	Calcium channel blocker	CACNA1C	-0.5989	1.2775	-1.5558
CPC015_ASC_24H:BRD-K45158365-001-05-6:10	BRD-K45158365	valsartan	ASC	trt_cp	10 uM	24 h	4	87	0.13	0.107538	0	0	1	1	0	Angiotensin receptor antagonist	AGTR1	-0.5988	1.2775	-1.5555
REP.B019_JURKAT_24H:F22	BRD-K46692793	umeclidinium	JURKAT	trt_cp	0.08 uM	24 h	2	171	0.3385	0.243281	0	0	1	1	0	Acetylcholine receptor antagonist	CHRM3|CHRM1|CHRM2	-0.5987	1.2774	-1.5553
CPC003_PC3_6H:BRD-K46469693-001-01-8:10	BRD-K46469693	SCH-442416	PC3	trt_cp	10 uM	6 h	4	419	0.17	0.269875	0	0	1	1	0	Adenosine receptor antagonist	ADORA1|ADORA2A	-0.5986	1.2773	-1.5551
REP.B027_HELA_24H:H01	BRD-K95880107	PH-797804	HELA	trt_cp	2.22 uM	24 h	2	64	0.1069	0.0836391	1	0	1	1	0	P38 MAPK inhibitor	MAPK14|MAPK11	-0.5986	1.2773	-1.5551
MOAR019_A375_24H:I03	BRD-K24968862	SB-683698	A375	trt_cp	3.33 uM	24 h	3	62	0.2975	0.137331	1	1	1	1	0	Integrin inhibitor	ITGA4|ITGAV|ITGB1|ITGB7	-0.5986	1.2773	-1.5551
REP.A022_HT29_24H:B13	BRD-K76908866	CP-724714	HT29	trt_cp	10 uM	24 h	3	141	0.4074	0.242354	1	1	1	1	0	Tyrosine kinase inhibitor|EGFR inhibitor	ERBB2	-0.5986	1.2772	-1.555
CPC006_U937_6H:BRD-K35960502-001-10-1:10	BRD-K35960502	niclosamide	U937	trt_cp	10 uM	6 h	2	348	0.71	0.502631	1	1	1	1	0	DNA inhibitor|STAT inhibitor	STAT3	-0.5986	1.2773	-1.555
REP.A010_A375_24H:C01	BRD-K12423485	griseofulvin	A375	trt_cp	10 uM	24 h	3	403	0.6466	0.51618	0	0	1	1	0	Tubulin inhibitor	KRT12	-0.5986	1.2772	-1.5549
CVD001_HUH7_6H:BRD-K03067624-001-01-5:10	BRD-K03067624	emetine	HUH7	trt_cp	10 uM	6 h	3	494	0.69	0.590362	0	0	1	1	0	Protein synthesis inhibitor	RPS2	-0.5985	1.2767	-1.5546
CPC014_HA1E_6H:BRD-K37130656-001-01-2:10	BRD-K37130656	rivaroxaban	HA1E	trt_cp	10 uM	6 h	3	116	0.02	0.0487051	1	0	1	1	0	Coagulation factor inhibitor	F10|CYP2J2|CYP3A5	-0.5984	1.2764	-1.5545
CPC017_HEPG2_6H:BRD-K67298865-001-03-3:10	BRD-K67298865	SB-431542	HEPG2	trt_cp	10 uM	6 h	3	206	0.16	0.183579	1	0	1	1	0	TGF-beta receptor inhibitor	TGFBR1|ACVR1C|ACVR1B	-0.5984	1.2762	-1.5544
EMU001_HBL1_24H:M01	BRD-K19295594	gossypol	HBL1	trt_cp	10 uM	24 h	3	359	0.5278	0.440162	1	1	1	1	0	BCL inhibitor|MCL1 inhibitor	BCL2|BCL2L1|MCL1|BCL2L2|CTGF|EGF	-0.5983	1.2759	-1.5543
CPC014_HA1E_6H:BRD-K38615104-001-06-8:10	BRD-K38615104	A-443654	HA1E	trt_cp	10 uM	6 h	3	510	0.68	0.595484	0	0	1	1	0	AKT inhibitor	AKT1|AKT2	-0.5982	1.2754	-1.554
LJP007_CD34_24H:O19	BRD-K31313613	BS-181	CD34	trt_cp	10 uM	24 h	3	665	0.7567	0.717304	0	0	1	1	0	CDK inhibitor	CDK7	-0.5981	1.2749	-1.5539
REP.B028_A375_24H:L23	BRD-A96292436	eflornithine	A375	trt_cp	0.03 uM	24 h	2	100	0.1493	0.123555	1	0	1	1	0	Ornithine decarboxylase inhibitor	ODC1|ARG2	-0.5981	1.2749	-1.5538
PBIOA022_HCC515_24H:P19	BRD-K70401845	erlotinib	HCC515	trt_cp	10 uM	24 h	3	489	0.67	0.578792	1	1	1	1	0	EGFR inhibitor	EGFR|NR1I2	-0.598	1.2699	-1.5534
CPC005_HT29_24H:BRD-A83937277-001-03-0:10	BRD-A83937277	mephenytoin	HT29	trt_cp	10 uM	24 h	3	102	0.25	0.161473	1	0	1	1	0	Hydantoin antiepileptic	SCN5A|CYP2C19|SCN10A|SCN11A|SCN1A|SCN2A|SCN3A|SCN4A|SCN7A|SCN8A|SCN9A	-0.598	1.2707	-1.5534
CPC016_NEU_24H:BRD-K63516691-003-01-2:10	BRD-K63516691	T-0156	NEU	trt_cp	10 uM	24 h	3	91	0.07	0.080705	0	0	1	1	0	Phosphodiesterase inhibitor	PDE5A	-0.5979	1.2636	-1.5531
CPD001_PC3_24H:BRD-K10598093-329-04-1:10	BRD-K10598093	hexamethonium	PC3	trt_cp	10 uM	24 h	3	347	0.38	0.367187	1	0	1	1	0	Cholinergic receptor antagonist	CHRNA2|CHRNA3|CHRNA4|CHRNA6	-0.5978	1.2636	-1.5529
MOAR007_PC3_24H:N02	BRD-K67977190	eprosartan	PC3	trt_cp	3.33 uM	24 h	3	242	0.33	0.285756	1	0	1	1	0	Angiotensin receptor antagonist	AGTR1	-0.5978	1.2636	-1.5529
LJP009_A549_24H:M01	BRD-K72703948	ZM-447439	A549	trt_cp	10 uM	24 h	5	346	0.5407	0.437368	0	0	1	1	0	Aurora kinase inhibitor	AURKA|AURKB	-0.5977	1.2636	-1.5527
CPC011_A375_6H:BRD-K33312228-001-04-3:10	BRD-K33312228	halometasone	A375	trt_cp	10 uM	6 h	3	235	0.12	0.169807	0	0	1	1	0	Glucocorticoid receptor agonist	NR3C1	-0.5977	1.2636	-1.5526
CPC006_NOMO1_6H:BRD-K76703230-001-01-3:0.31	BRD-K76703230	YM-155	NOMO1	trt_cp	0.3 uM	6 h	2	268	0.36	0.314086	0	0	1	1	0	Survivin inhibitor	BIRC5	-0.5976	1.2636	-1.5525
REP.B008_MDAMB231_24H:B07	BRD-K99107520	felbamate	MDAMB231	trt_cp	2.22 uM	24 h	2	162	0.2811	0.215784	1	1	1	1	0	Glutamate receptor antagonist	GRIN2A|GRIN2B|GRIN3A|GRIN1|GRIN2C|GRIN2D|GRIN3B	-0.5976	1.2636	-1.5523
REP.A028_THP1_24H:P07	BRD-A97437073	rosiglitazone	THP1	trt_cp	10 uM	24 h	2	136	0.1198	0.129071	0	0	1	1	0	PPAR receptor agonist|Insulin sensitizer	PPARG|CYP2C8|INS|ACSL4|FFAR1|TRPC5|TRPM3	-0.5974	1.2636	-1.552
CPC006_HCT116_6H:BRD-K32330832-001-01-0:11.1	BRD-K32330832	VER-155008	HCT116	trt_cp	12 uM	6 h	2	228	0.51	0.344813	0	0	1	1	0	HSP inhibitor	HSPA1A	-0.5975	1.2636	-1.552
LPROT004_YAPC_6H:BRD-K26818574:10	BRD-K26818574	BIX-01294	YAPC	trt_cp	10 uM	6 h	3	256	0.69	0.424986	1	1	1	1	0	DNA inhibitor|Histone lysine methyltransferase inhibitor	EHMT2|EHMT1	-0.5974	1.2636	-1.5518
PBIOA014_HT29_24H:I01	BRD-K51575138	TPCA-1	HT29	trt_cp	10 uM	24 h	2	477	0.7486	0.604247	1	1	1	1	0	IKK inhibitor	IKBKB	-0.5972	1.2636	-1.5515
LJP001_MCF10A_24H:BRD-K82091397-001-02-2:10	BRD-K82091397	SB-239063	MCF10A	trt_cp	10 uM	24 h	4	136	0.23	0.17884	1	0	1	1	0	P38 MAPK inhibitor	TNF|MAPK11|MAPK14|PTGS2	-0.5972	1.2636	-1.5514
REP.A004_HEK293_24H:N04	BRD-A24228527	ofloxacin	HEK293	trt_cp	0.37 uM	24 h	2	108	0.5945	0.256223	0	0	1	1	0	Bacterial DNA inhibitor	TOP2A	-0.5972	1.2636	-1.5514
CPC010_A549_24H:BRD-K70578146-001-03-4:10	BRD-K70578146	dactinomycin	A549	trt_cp	10 uM	24 h	2	600	0.58	0.596513	0	0	1	1	0	RNA polymerase inhibitor	POLR2A	-0.5972	1.2636	-1.5514
CPC006_HCT116_6H:BRD-K09778810-001-03-1:10	BRD-K09778810	FGIN-1-27	HCT116	trt_cp	10 uM	6 h	2	71	0.13	0.0971475	0	0	1	1	0	Inositol monophosphatase inhibitor	TSPO	-0.5971	1.2636	-1.5513
REP.B028_HELA_24H:A13	BRD-K92441787	bexarotene	HELA	trt_cp	2.22 uM	24 h	2	151	0.2471	0.195324	1	1	1	1	0	Retinoid receptor agonist	RXRA|RXRB|RXRG|ABCA1|CYP2C8|CYP3A4	-0.5972	1.2636	-1.5513
REP.A005_PC3_24H:H01	BRD-K09255212	clioquinol	PC3	trt_cp	10 uM	24 h	2	110	0.2234	0.158514	1	1	1	1	0	Chelating agent	OPRK1	-0.5971	1.2636	-1.5511
REP.A023_YAPC_24H:E19	BRD-K69116396	sertindole	YAPC	trt_cp	10 uM	24 h	3	189	0.4055	0.279935	1	1	1	1	0	Dopamine receptor antagonist|Serotonin receptor antagonist	DRD2|HTR2A|HTR2C|ADRA1A|ADRA1B|ADRA1D|DRD3|DRD4|HRH1|HTR1A|HTR1B|HTR1D|HTR1E|HTR1F|HTR6|KCNH2	-0.597	1.2636	-1.5509
REP.A023_MDAMB231_24H:E19	BRD-K69116396	sertindole	MDAMB231	trt_cp	10 uM	24 h	2	160	0.4765	0.279204	1	1	1	1	0	Dopamine receptor antagonist|Serotonin receptor antagonist	DRD2|HTR2A|HTR2C|ADRA1A|ADRA1B|ADRA1D|DRD3|DRD4|HRH1|HTR1A|HTR1B|HTR1D|HTR1E|HTR1F|HTR6|KCNH2	-0.597	1.2636	-1.5508
REP.A013_YAPC_24H:L01	BRD-K42098891	protriptyline	YAPC	trt_cp	10 uM	24 h	3	276	0.4652	0.362331	1	1	1	1	0	Tricyclic antidepressant	SLC6A2|SLC6A4	-0.597	1.2636	-1.5508
CPC006_U937_6H:BRD-K92241597-001-02-9:80	BRD-K92241597	tosedostat	U937	trt_cp	80 uM	6 h	2	318	0.7	0.477082	1	1	1	1	0	Peptidase inhibitor	ANPEP|NPEPPS|LAP3	-0.597	1.2636	-1.5508
REP.A011_PC3_24H:G01	BRD-K05524748	dronedarone	PC3	trt_cp	10 uM	24 h	3	245	0.5482	0.370581	0	0	1	1	0	Adrenergic receptor antagonist	SLC22A2|SLC22A8|SLCO1B3|ADRA1A|ADRA1B|ADRA1D|ADRA2A|ADRA2B|ADRA2C|ADRB1|CACNA1C|CACNA1D|CACNA1F|CACNA1S|CACNB1|CACNB2|CACNB3|CACNB4|KCNA5|KCNH2|KCNK2|SCN1A	-0.5969	1.2636	-1.5507
REP.B021_HUVEC.A_24H:C08	BRD-K81458380	CX-4945	HUVEC	trt_cp	0.74 uM	24 h	2	187	0.3099	0.243423	0	0	1	1	0	Casein kinase inhibitor	CSNK2A1|CSNK2A2|CSNK2B|DAPK3|HIPK3	-0.5969	1.2636	-1.5506
CPC017_HT29_6H:BRD-K27737647-300-01-4:10	BRD-K27737647	H-89	HT29	trt_cp	10 uM	6 h	5	138	0.22	0.17619	0	0	1	1	0	PKA inhibitor	PRKACA|KCNA2|KCNA3|KCNA5|KCNAB2|KCNC1|KCNC2|KCNC3|KCNE1|KCNE2|KCNE3|KCNE4|KCNH1|KCNH2|KCNQ1|KCNQ2|KCNQ3|KCNQ5|KCNS3|GSG2|PKIA	-0.5968	1.2636	-1.5504
LJP007_A549_24H:A19	BRD-K51575138	TPCA-1	A549	trt_cp	10 uM	24 h	3	313	0.4754	0.390061	1	1	1	1	0	IKK inhibitor	IKBKB	-0.5968	1.2636	-1.5503
KTOX002_HPTEC_6H:BRD-A55962179:100	BRD-A55962179	omeprazole	HPTEC	trt_cp	100 uM	6 h	3	190	0.39	0.275258	1	1	1	1	0	Proton pump inhibitor	ATP4A|CYP1A2|CYP2C19|CLCN2	-0.5967	1.2636	-1.5501
REP.B012_HELA_24H:H23	BRD-K01815685	BRD-K01815685	HELA	trt_cp	0.03 uM	24 h	2	224	0.4536	0.322323	0	0	1	1	0	Aryl hydrocarbon receptor agonist|Indoleamine 2,3-dioxygenase inhibitor	AHR|IDO1	-0.5966	1.2636	-1.5499
REP.A026_PC3_24H:J22	BRD-K91315211	betahistine	PC3	trt_cp	0.37 uM	24 h	2	108	0.138	0.123447	0	0	1	1	0	Histamine receptor agonist|Histamine receptor antagonist	HRH3|HRH1	-0.5966	1.2634	-1.5497
CPC018_HT29_6H:BRD-K14767410-001-01-5:10	BRD-K14767410	SC-560	HT29	trt_cp	10 uM	6 h	5	372	0.25	0.30837	1	0	1	1	0	Cyclooxygenase inhibitor	PTGS1	-0.5965	1.2633	-1.5496
REP.A010_A549_24H:L19	BRD-K14870255	R-428	A549	trt_cp	10 uM	24 h	3	244	0.4749	0.344212	1	1	1	1	0	AXL kinase inhibitor	AXL	-0.5965	1.263	-1.5495
CPC015_A549_24H:BRD-K33818169-003-01-2:10	BRD-K33818169	GW-3965	A549	trt_cp	10 uM	24 h	3	515	0.13	0.261641	0	0	1	1	0	LXR agonist|ABC transporter expression enhancer	NR1H2|NR1H3|ABCA1	-0.5964	1.2594	-1.5493
CPC017_PHH_24H:BRD-K11927976-050-01-1:10	BRD-K11927976	ER-27319	PHH	trt_cp	10 uM	24 h	3	473	0.68	0.573476	0	0	1	1	0	Syk inhibitor	SYK	-0.5964	1.2567	-1.5492
CPC016_A549_24H:BRD-K09397065-003-03-8:10	BRD-K09397065	SR-57227A	A549	trt_cp	10 uM	24 h	3	248	0.26	0.256769	0	0	1	1	0	Serotonin receptor agonist	HTR3A	-0.5963	1.2547	-1.5491
REP.A028_HELA_24H:P13	BRD-K97472745	gestrinone	HELA	trt_cp	10 uM	24 h	3	505	0.702	0.602067	1	1	1	1	0	Progesterone receptor antagonist	PGR|AR|ESR1	-0.5963	1.2537	-1.549
LUNG001_A549_24H:BRD-K04833372:10	BRD-K04833372	GSK-1904529A	A549	trt_cp	10 uM	24 h	2	153	0.2935	0.214279	1	1	1	1	0	IGF-1 inhibitor	IGF1R|INSR	-0.5963	1.2533	-1.5489
CPC011_MCF7_24H:BRD-K39484304-001-08-2:10	BRD-K39484304	triptolide	MCF7	trt_cp	10 uM	24 h	2	442	0.43	0.440835	0	0	1	1	0	RNA polymerase inhibitor	CYP2C19|RELA	-0.5963	1.2534	-1.5489
REP.A023_HA1E_24H:J01	BRD-K70490179	rimcazole	HA1E	trt_cp	10 uM	24 h	3	583	0.5316	0.562934	1	1	1	1	0	Sigma receptor antagonist	SIGMAR1	-0.5962	1.2529	-1.5488
CPC010_A375_6H:P23	BRD-K70578146	dactinomycin	A375	trt_cp	10 uM	6 h	3	586	0.5583	0.57838	1	1	1	1	0	RNA polymerase inhibitor	POLR2A	-0.5961	1.2529	-1.5486
CPC014_PHH_24H:BRD-K99545815-001-01-4:10	BRD-K99545815	PF-562271	PHH	trt_cp	10 uM	24 h	4	410	0.53	0.471368	0	0	1	1	0	Focal adhesion kinase inhibitor	PTK2|PTK2B	-0.5961	1.2529	-1.5486
REP.B015_HT29_24H:C07	BRD-K56291712	voxtalisib	HT29	trt_cp	2.22 uM	24 h	2	209	0.4864	0.322404	1	1	1	1	0	MTOR inhibitor|PI3K inhibitor	MTOR|PIK3CA	-0.5961	1.2529	-1.5486
LJP007_MDAMB231_24H:G07	BRD-K57169635	dacomitinib	MDAMB231	trt_cp	10 uM	24 h	2	315	0.6647	0.462699	1	1	1	1	0	EGFR inhibitor	EGFR|ERBB2|ERBB4	-0.5961	1.2529	-1.5486
CPC010_HA1E_6H:BRD-K86595100-001-08-3:10	BRD-K86595100	chlordiazepoxide	HA1E	trt_cp	10 uM	6 h	3	244	0.04	0.0998977	1	0	1	1	0	Benzodiazepine receptor agonist	GABRA1|GABRA2|GABRA3|GABRA4|GABRA5|GABRA6|GABRB1|GABRB2|GABRB3|GABRD|GABRE|GABRG1|GABRG2|GABRG3|GABRP|GABRQ	-0.596	1.2528	-1.5484
CPC016_A375_6H:BRD-K81876028-300-01-2:10	BRD-K81876028	CP-93129	A375	trt_cp	10 uM	6 h	5	99	0.11	0.105522	1	0	1	1	0	Serotonin receptor agonist	HTR1B|HTR1A	-0.5961	1.2529	-1.5484
CPC018_PHH_24H:BRD-K00675675-003-01-2:10	BRD-K00675675	CL-82198	PHH	trt_cp	10 uM	24 h	3	213	0.26	0.237962	0	0	1	1	0	Metalloproteinase inhibitor	MMP13	-0.596	1.2524	-1.5482
REP.A028_PC3_24H:G19	BRD-K94397152	ribavirin	PC3	trt_cp	10 uM	24 h	2	153	0.2786	0.208769	0	0	1	1	0	Antiviral	IMPDH1|ADK|ENPP1|IMPDH2|NT5C2	-0.5959	1.2517	-1.548
MOAR002_PC3_24H:N11	BRD-K58568447	K-02288	PC3	trt_cp	3.33 uM	24 h	3	199	0.37	0.274383	1	1	1	1	0	Bone resorption inhibitor	ABL1|ABL2|ACVR1|ACVRL1|BMPR1A|HCK|LCK|MAP4K4|PTK6|BMP1	-0.5959	1.2518	-1.548
REP.B027_HT29_24H:I02	BRD-A97104540	fenoterol	HT29	trt_cp	0.74 uM	24 h	2	103	0.1267	0.115515	1	1	1	1	0	Adrenergic receptor agonist	ADRB2|ADRB1|ADRB3	-0.5958	1.2494	-1.5478
CPD002_PC3_6H:BRD-K34411947-001-07-5:10	BRD-K34411947	streptozotocin	PC3	trt_cp	10 uM	6 h	3	273	0.38	0.325689	0	0	1	1	0	DNA alkylating agent	SLC2A2	-0.5957	1.2427	-1.5476
REP.B009_MDAMB231_24H:B19	BRD-K28392481	AZD-4547	MDAMB231	trt_cp	2.22 uM	24 h	2	77	0.0911	0.0846906	1	1	1	1	0	FGFR inhibitor	FGF2|FGFR1|FGFR2|FGFR3|FGFR4|IGF1R|KDR	-0.5957	1.2427	-1.5475
REP.B024_MDAMB231_24H:D01	BRD-K74141488	naftifine	MDAMB231	trt_cp	2.22 uM	24 h	2	185	0.4443	0.289904	0	0	1	1	0	Fungal squalene epoxidase inhibitor	SQLE	-0.5957	1.2427	-1.5474
PAC003_U2OS_6H:BRD-K22385716-001-01-7:10	BRD-K22385716	LY-303511	U2OS	trt_cp	10 uM	6 h	2	214	0.4	0.295847	1	0	1	1	0	Casein kinase inhibitor|PI3K inhibitor	CSNK2A1|CSNK2A2|CSNK2B|MTOR|BRD2|BRD3|BRD4	-0.5956	1.2427	-1.5473
CPC006_NOMO1_6H:BRD-K92241597-001-02-9:80	BRD-K92241597	tosedostat	NOMO1	trt_cp	80 uM	6 h	2	357	0.11	0.200383	0	0	1	1	0	Peptidase inhibitor	ANPEP|NPEPPS|LAP3	-0.5956	1.2427	-1.5473
REP.B014_A375_24H:L06	BRD-K59325863	delanzomib	A375	trt_cp	0.01 uM	24 h	2	179	0.398	0.269897	1	1	1	1	0	Proteasome inhibitor	CMA1|CTSG|CYP3A4|ELANE	-0.5954	1.2427	-1.5468
CPC016_NEU_24H:BRD-K19309090-300-03-0:10	BRD-K19309090	SR-95639A	NEU	trt_cp	10 uM	24 h	3	284	0.31	0.300034	0	0	1	1	0	Acetylcholine receptor agonist	CHRM1	-0.5954	1.2427	-1.5467
REP.A001_HT29_24H:I14	BRD-K28731095	calcitriol	HT29	trt_cp	3.33 uM	24 h	3	153	0.26	0.20168	0	0	1	1	0	Vitamin D receptor agonist	VDR|CYP3A5	-0.5954	1.2427	-1.5467
REP.A025_A375_24H:P19	BRD-K73440166	cinaciguat	A375	trt_cp	10 uM	24 h	3	117	0.2732	0.180786	1	1	1	1	0	Guanylate cyclase activator	GUCY1B3|GUCY1A3	-0.5954	1.2427	-1.5467
REP.A025_HA1E_24H:H24	BRD-A74391928	ibutilide	HA1E	trt_cp	0.04 uM	24 h	3	165	0.2534	0.206764	1	1	1	1	0	Potassium channel antagonist	KCNH2|CACNA1C|SCN5A|CACNA2D1|CACNB1|CACNG1|KCNH6|KCNH7|KCNJ11|KCNK1|KCNK6	-0.5954	1.2427	-1.5467
REP.A019_HEK293_24H:G02	BRD-K47095176	talnetant	HEK293	trt_cp	3.33 uM	24 h	2	360	0.2381	0.296048	0	0	1	1	0	Tachykinin antagonist	TACR3|TACR2	-0.5952	1.2427	-1.5462
REP.A001_A549_24H:M04	BRD-K29582115	ziprasidone	A549	trt_cp	0.37 uM	24 h	2	113	0.245	0.168249	0	0	1	1	0	Dopamine receptor antagonist|Serotonin receptor antagonist	DRD2|HTR2A|HTR1A|HTR1D|HRH1|HTR1B|HTR1E|HTR2C|HTR7|ADRA1A|ADRA1B|ADRA2A|ADRA2B|ADRA2C|CHRM1|CHRM2|CHRM3|CHRM4|CHRM5|DRD1|DRD3|DRD4|DRD5|HTR3A|HTR6|SLC6A4	-0.5952	1.2427	-1.5461
MOAR007_PC3_24H:B23	BRD-K20313525	rosmarinic-acid	PC3	trt_cp	3.33 uM	24 h	3	133	0.17	0.152048	1	0	1	1	0	GABA receptor antagonist	MCL1|TYR	-0.5952	1.2427	-1.5461
REP.B012_A549_24H:P19	BRD-K03449891	foretinib	A549	trt_cp	2.22 uM	24 h	2	296	0.4889	0.384668	0	0	1	1	0	VEGFR inhibitor	KDR|MET|AXL|FLT3|KIT|MST1R|TEK|FLT1|FLT4	-0.5952	1.2427	-1.5461
CPC004_PC3_6H:BRD-K36055864-001-09-3:10	BRD-K36055864	cycloheximide	PC3	trt_cp	10 uM	6 h	5	448	0.67	0.553996	1	1	1	1	0	Protein synthesis inhibitor	GSK3B|RPL3	-0.5951	1.2427	-1.546
CPC020_MCF7_6H:BRD-K93568044-001-24-7:10	BRD-K93568044	hydrocortisone	MCF7	trt_cp	10 uM	6 h	4	216	0.09	0.140987	1	0	1	1	0	Glucocorticoid receptor agonist	NR3C1	-0.5951	1.2427	-1.5459
CPC018_SKB_24H:BRD-K51677086-001-07-0:10	BRD-K51677086	erythromycin-ethylsuccinate	SKB	trt_cp	10 uM	24 h	3	128	0.04	0.0723545	0	0	1	1	0	Cytochrome P450 inhibitor|Motilin receptor agonist|NFKB inhibitor|Protein synthesis inhibitor	CYP3A4|MLNR|ABCB1|ALB|CYP51A1|KCNH2|SLC47A1	-0.5951	1.2427	-1.5458
REP.B020_MCF10A_24H:A21	BRD-K83405785	pimavanserin	MCF10A	trt_cp	0.25 uM	24 h	2	190	0.3518	0.26143	0	0	1	1	0	Serotonin receptor antagonist	HTR2A|DRD2	-0.595	1.2424	-1.5456
CPC006_H1299_6H:BRD-K62810658-001-06-4:10	BRD-K62810658	PD-98059	H1299	trt_cp	10 uM	6 h	2	78	0.32	0.159754	0	0	1	1	0	MEK inhibitor|MAP kinase inhibitor	MAP2K1|MAP2K2|MAPK3|AKT1|CHEK1|GSK3B|LCK|MAPK1|MAPK11|MAPK12|MAPK14|MAPK8|PRKCA|RAF1|ROCK1|RPS6KB1|SGK1	-0.595	1.2425	-1.5456
REP.A021_HUVEC.A_24H:M19	BRD-K85606544	neratinib	HUVEC	trt_cp	10 uM	24 h	2	377	0.6307	0.493075	0	0	1	1	0	EGFR inhibitor	EGFR|ERBB2|ERBB4|KDR	-0.5949	1.242	-1.5454
CPC014_NEU_24H:BRD-K50720187-050-04-1:10	BRD-K50720187	flupirtine	NEU	trt_cp	10 uM	24 h	2	117	0.15	0.133958	0	0	1	1	0	Glutamate receptor antagonist	KCNQ2|KCNQ3|ADRA2A|KCNQ1	-0.5949	1.242	-1.5454
CPC011_A375_6H:BRD-K59753975-065-02-1:10	BRD-K59753975	vindesine	A375	trt_cp	10 uM	6 h	3	123	0.56	0.265385	1	1	1	1	0	Tubulin inhibitor	TUBB|TUBB1	-0.5949	1.2416	-1.5453
REP.B026_HT29_24H:F05	BRD-K89162000	tandutinib	HT29	trt_cp	0.03 uM	24 h	2	102	0.2401	0.158244	1	1	1	1	0	FLT3 inhibitor|KIT inhibitor|PDGFR inhibitor	FLT3|KIT|PDGFRA|PDGFRB|CSF1R|PDGFD	-0.5948	1.241	-1.5452
CPC006_HCC515_24H:G11	BRD-K19295594	gossypol	HCC515	trt_cp	12 uM	24 h	5	307	0.4361	0.369992	1	1	1	1	0	BCL inhibitor|MCL1 inhibitor	BCL2|BCL2L1|MCL1|BCL2L2|CTGF|EGF	-0.5947	1.2327	-1.545
REP.A022_HT29_24H:G01	BRD-K70401845	erlotinib	HT29	trt_cp	10 uM	24 h	3	551	0.6693	0.614068	1	1	1	1	0	EGFR inhibitor	EGFR|NR1I2	-0.5948	1.2329	-1.545
CPC015_A549_6H:BRD-A55416093-001-03-1:10	BRD-A55416093	colforsin	A549	trt_cp	10 uM	6 h	2	86	0.25	0.148269	0	0	1	1	0	Adenylyl cyclase activator	ADCY2|ADCY5	-0.5947	1.2325	-1.5449
CPC018_NPC_24H:BRD-K26429091-051-01-9:10	BRD-K26429091	J-104129	NPC	trt_cp	10 uM	24 h	3	198	0.36	0.269969	0	0	1	1	0	Acetylcholine receptor antagonist	CHRM3	-0.5947	1.2325	-1.5448
LJP009_HUVEC_24H:E19	BRD-K44227013	ponatinib	HUVEC	trt_cp	10 uM	24 h	3	627	0.6796	0.660072	1	1	1	1	0	Bcr-Abl inhibitor|FLT3 inhibitor|PDGFR inhibitor	ABL1|BCR|FLT3|RET|FGFR1|FGFR2|FGFR3|FGFR4|KIT|TEK|CYP2C8|CYP3A5|FGF2|FLT1|KDR|LCK|LYN|PDGFRA|SRC	-0.5947	1.2325	-1.5448
CPC015_NPC_24H:BRD-K28183345-003-07-2:10	BRD-K28183345	proguanil	NPC	trt_cp	10 uM	24 h	4	165	0.14	0.153687	0	0	1	1	0	Dihydrofolate reductase inhibitor	CYP2C19|DHFR	-0.5947	1.2325	-1.5448
NMH001_NPC_24H:N13	BRD-K72381300	SK-383933	NPC	trt_cp	10 uM	24 h	3	523	0.686	0.60568	0	0	1	1	0	Dopamine receptor agonist	DRD1|DRD5	-0.5945	1.2325	-1.5443
CPC011_A375_6H:BRD-K39621635-001-04-8:10	BRD-K39621635	artemether	A375	trt_cp	10 uM	6 h	3	551	0.35	0.444059	0	0	1	1	0	Antimalarial	CYP2B6|CYP2C19|CYP3A5|ATP1A1	-0.5944	1.2325	-1.5442
ABY001_NCIH596_XH:BRD-K66175015:10:24	BRD-K66175015	afatinib	NCIH596	trt_cp	10 uM	24 h	3	403	0.63	0.509511	1	1	1	1	0	EGFR inhibitor	EGFR|ERBB2|ERBB4	-0.5944	1.2325	-1.5441
CPC011_MCF7_24H:BRD-K50866992-003-07-9:10	BRD-K50866992	tropisetron	MCF7	trt_cp	10 uM	24 h	2	387	0.29	0.338754	0	0	1	1	0	Serotonin receptor antagonist	HTR3A|GLRA1|GLRA2|GLRB|HTR4	-0.5944	1.2325	-1.5441
CPC014_PHH_24H:BRD-K64800655-001-01-7:10	BRD-K64800655	PHA-793887	PHH	trt_cp	10 uM	24 h	2	185	0.31	0.242157	0	0	1	1	0	CDK inhibitor	CDK1|CDK2|CDK4|CDK5|CCND1|CCNE1|CDK7|CDK9	-0.5944	1.2325	-1.5441
ASG002_PC3_24H:B19	BRD-K51544265	cabozantinib	PC3	trt_cp	10 uM	24 h	3	271	0.4165	0.339721	1	1	1	1	0	RET inhibitor|VEGFR inhibitor	KDR|MET|FLT3|KIT|RET|TEK|CYP2C19	-0.5943	1.2325	-1.544
CPC006_U937_6H:BRD-K52836380-001-01-7:22.2	BRD-K52836380	AZD-7545	U937	trt_cp	20 uM	6 h	2	145	0.48	0.266769	1	1	1	1	0	Pyruvate dehydrogenase kinase inhibitor	PDK2|PDK1	-0.5944	1.2325	-1.544
CPC009_HA1E_6H:BRD-K64610608-001-04-2:10	BRD-K64610608	EMF-BCA1-57	HA1E	trt_cp	10 uM	6 h	3	90	0.08	0.0858019	1	0	1	1	0	Caspase inhibitor	CASP3	-0.5944	1.2325	-1.544
REP.A010_MCF10A_24H:E09	BRD-K12932420	YM-976	MCF10A	trt_cp	1.11 uM	24 h	2	73	0.3171	0.153847	1	1	1	1	0	Phosphodiesterase inhibitor	PDE4A|PDE4B|PDE4C|PDE4D|TNF	-0.5943	1.2325	-1.5438
CPC001_VCAP_6H:B13	BRD-A73581086	ergometrine	VCAP	trt_cp	10 uM	6 h	5	390	0.1955	0.279213	0	0	1	1	0	Adrenergic receptor agonist|Serotonin receptor agonist	HTR2A	-0.5942	1.2325	-1.5436
CPC015_SKB_24H:BRD-K01815685-001-07-2:10	BRD-K01815685	BRD-K01815685	SKB	trt_cp	10 uM	24 h	2	220	0.45	0.318162	0	0	1	1	0	Aryl hydrocarbon receptor agonist|Indoleamine 2,3-dioxygenase inhibitor	AHR|IDO1	-0.5942	1.2325	-1.5436
CPC004_HCC515_6H:BRD-K09602097-001-04-5:10	BRD-K09602097	forskolin	HCC515	trt_cp	10 uM	6 h	3	94	0.43	0.203296	1	1	1	1	0	Adenylyl cyclase activator	ADCY2|ADCY5|GNAS	-0.5941	1.2325	-1.5433
REP.A026_HT29_24H:B13	BRD-K87737963	CYT-387	HT29	trt_cp	10 uM	24 h	3	356	0.4887	0.421771	0	0	1	1	0	JAK inhibitor	JAK1|JAK2|JAK3	-0.5941	1.2325	-1.5433
CPC004_PC3_6H:BRD-K30240666-051-08-4:10	BRD-K30240666	clemastine	PC3	trt_cp	10 uM	6 h	5	480	0.19	0.305371	0	0	1	1	0	Histamine receptor antagonist	HRH1	-0.594	1.2325	-1.5432
CPC006_U937_6H:BRD-K59184148-001-04-2:10	BRD-K59184148	SB-216763	U937	trt_cp	10 uM	6 h	2	183	0.4	0.273581	1	1	1	1	0	GSK inhibitor	GSK3B|CCNA2|CDK2|GSK3A	-0.594	1.2325	-1.5432
CPD001_PC3_24H:BRD-K96253961-346-03-5:10	BRD-K96253961	metaraminol	PC3	trt_cp	10 uM	24 h	3	129	0.21	0.166431	1	0	1	1	0	Adrenergic receptor agonist	ADRA1A	-0.5941	1.2325	-1.5432
REP.A013_YAPC_24H:C07	BRD-K37872686	tirofiban	YAPC	trt_cp	10 uM	24 h	3	58	0.1307	0.0880405	1	0	1	1	0	Platelet aggregation inhibitor|Structural glycoprotein antagonist	ITGA2B|ITGB3	-0.5939	1.2325	-1.5428
CPC004_HEPG2_6H:BRD-K62792802-001-02-8:10	BRD-K62792802	LY-83583	HEPG2	trt_cp	10 uM	6 h	3	265	0.48	0.36064	0	0	1	1	0	Guanylyl cyclase inhibitor	GUCY1A2	-0.5939	1.2325	-1.5428
REP.A026_HEK293_24H:M17	BRD-K99092662	PS-178990	HEK293	trt_cp	0.125 uM	24 h	2	136	0.1063	0.121581	0	0	1	1	0	Androgen receptor antagonist	AR	-0.5938	1.2325	-1.5427
REP.A005_HELA_3H:E09	BRD-K08859203	DU-728	HELA	trt_cp	1.11 uM	3 h	3	207	0.3004	0.252154	1	0	1	1	0	Structural glycoprotein antagonist	ITGA2B|ITGB3	-0.5938	1.2325	-1.5425
CPC018_SKB_24H:BRD-K14965640-001-03-3:10	BRD-K14965640	BRD-K14965640	SKB	trt_cp	10 uM	24 h	3	319	0.15	0.221193	0	0	1	1	0	Cyclooxygenase inhibitor	PTGS2|PTGS1|ASIC1|BCL2|CFTR|FABP2|PLAT|PPARG|SLC5A8|THBD	-0.5937	1.2325	-1.5422
REP.A025_JURKAT_24H:F05	BRD-A98702003	carbenoxolone	JURKAT	trt_cp	0.125 uM	24 h	2	488	0.0221	0.105011	0	0	1	1	0	11-beta-HSD1 inhibitor	HSD11B1|GJA1|GJA10|GJA3|GJA4|GJA5|GJA8|GJA9|GJB1|GJB2|GJB3|GJB4|GJB5|GJB6|GJB7|GJC1|GJC2|GJC3|GJD2|GJD3|GJD4|GJE1|PANX1|PANX2|PANX3	-0.5937	1.2325	-1.5422
REP.A005_YAPC_24H:J24	BRD-A10012892	argatroban	YAPC	trt_cp	0.04 uM	24 h	3	207	0.4264	0.300417	0	0	1	1	0	Thrombin inhibitor	F2|CYP3A5	-0.5935	1.2325	-1.5419
CPC015_A549_24H:BRD-K23566484-001-09-4:10	BRD-K23566484	nilutamide	A549	trt_cp	10 uM	24 h	3	80	0.31	0.159242	1	1	1	1	0	Androgen receptor antagonist	AR|CYP2C19	-0.5935	1.2325	-1.5418
CPC002_HCC515_24H:BRD-K49671696-045-03-6:10	BRD-K49671696	ketanserin	HCC515	trt_cp	10 uM	24 h	3	102	0.09	0.096884	1	0	1	1	0	Serotonin receptor antagonist	HTR2A|HTR2C|ADRA1A|ADRA1B|ADRA1D|DRD1|DRD5|HTR1A|HTR1B|HTR1D|HTR2B|HTR5A|HTR7|SLC18A1|SLC18A2	-0.5935	1.2325	-1.5417
CPC014_MCF7_6H:N15	BRD-K80725632	lavendustin-c	MCF7	trt_cp	10 uM	6 h	5	162	0.0656	0.104241	1	0	1	1	0	EGFR inhibitor	CAMK2A|EGFR|SRC	-0.5935	1.2325	-1.5417
CPC011_HT29_6H:BRD-K82147103-003-04-9:10	BRD-K82147103	lofepramine	HT29	trt_cp	10 uM	6 h	4	748	0.12	0.302951	0	0	1	1	0	Norepinephrine inhibitor|Serotonin reuptake inhibitor	SLC6A2|SLC6A4|HTR1A	-0.5934	1.2325	-1.5414
CPC014_PHH_24H:BRD-K51313569-001-02-9:10	BRD-K51313569	palbociclib	PHH	trt_cp	10 uM	24 h	4	137	0.24	0.183357	0	0	1	1	0	CDK inhibitor	CDK4|CDK6|CCND3	-0.5933	1.2325	-1.5412
CPC016_A375_6H:BRD-K95202259-001-01-9:10	BRD-K95202259	ML-3163	A375	trt_cp	10 uM	6 h	5	161	0.22	0.190307	0	0	1	1	0	P38 MAPK inhibitor	MAPK14	-0.5932	1.2325	-1.5411
REP.A003_JURKAT_24H:H02	BRD-A33168282	sotalol	JURKAT	trt_cp	3.33 uM	24 h	2	229	0.6571	0.392251	0	0	1	1	0	Adrenergic receptor antagonist	ADRB1|ADRB2|KCNH2	-0.5931	1.2321	-1.5407
CPC011_VCAP_6H:BRD-K39484304-001-08-2:10	BRD-K39484304	triptolide	VCAP	trt_cp	10 uM	6 h	3	656	0.58	0.62373	0	0	1	1	0	RNA polymerase inhibitor	CYP2C19|RELA	-0.593	1.232	-1.5406
REP.A019_PC3_24H:K01	BRD-K48894757	laropiprant	PC3	trt_cp	10 uM	24 h	3	281	0.298	0.292612	0	0	1	1	0	Prostanoid receptor antagonist	PTGDR|PTGDR2|PTGER1|PTGER2|PTGER3|PTGFR|PTGIR|TBXA2R	-0.5931	1.232	-1.5406
LJP008_HEK293_24H:D01	BRD-K02113016	olaparib	HEK293	trt_cp	10 uM	24 h	2	224	0.342	0.279877	1	1	1	1	0	PARP inhibitor	PARP1|PARP2|PARP3	-0.5929	1.2303	-1.5401
REP.A012_MCF10A_24H:J24	BRD-K02314383	epitiostanol	MCF10A	trt_cp	0.04 uM	24 h	3	154	0.1419	0.14948	1	0	1	1	0	Androgen receptor agonist	AR	-0.5929	1.2305	-1.5401
REP.A022_HEK293_24H:M01	BRD-K68938568	GDC-0152	HEK293	trt_cp	10 uM	24 h	3	127	0.1086	0.118754	0	0	1	1	0	XIAP inhibitor	BIRC2|BIRC3|BIRC7|XIAP	-0.5928	1.2293	-1.54
CPC016_A375_6H:BRD-K61177364-003-01-1:10	BRD-K61177364	NBI-27914	A375	trt_cp	10 uM	6 h	5	461	0.1	0.217111	1	0	1	1	0	CRF receptor antagonist	CRHR1	-0.5928	1.2297	-1.54
REP.A025_YAPC_24H:F01	BRD-A98702003	carbenoxolone	YAPC	trt_cp	10 uM	24 h	3	308	0.5396	0.412232	1	1	1	1	0	11-beta-HSD1 inhibitor	HSD11B1|GJA1|GJA10|GJA3|GJA4|GJA5|GJA8|GJA9|GJB1|GJB2|GJB3|GJB4|GJB5|GJB6|GJB7|GJC1|GJC2|GJC3|GJD2|GJD3|GJD4|GJE1|PANX1|PANX2|PANX3	-0.5928	1.2284	-1.5399
REP.A008_HELA_24H:G01	BRD-K60038276	irbesartan	HELA	trt_cp	10 uM	24 h	3	166	0.4524	0.277106	0	0	1	1	0	Angiotensin receptor antagonist	AGTR1|JUN|SLC10A1	-0.5927	1.2262	-1.5398
CPC002_PC3_24H:BRD-K93201660-001-03-2:10	BRD-K93201660	ML-7	PC3	trt_cp	10 uM	24 h	4	134	0.22	0.173618	1	0	1	1	0	Muscle relaxant	MYLK	-0.5927	1.2135	-1.5396
REP.A008_PC3_24H:M01	BRD-K98453471	salirasib	PC3	trt_cp	10 uM	24 h	2	105	0.3042	0.180719	0	0	1	1	0	MTOR inhibitor	TRPA1|MTOR	-0.5926	1.2101	-1.5395
CPC017_HEPG2_6H:BRD-A94756469-001-03-9:10	BRD-A94756469	digoxin	HEPG2	trt_cp	10 uM	6 h	3	362	0.54	0.447076	1	1	1	1	0	Na/K-ATPase inhibitor	ATP1A1|ABCB1|RORC|SLCO1B3	-0.5926	1.2096	-1.5394
LJP007_THP1_24H:C24	BRD-K79090631	CGP-60474	THP1	trt_cp	0.04 uM	24 h	2	849	0.8309	0.849295	0	0	1	1	0	CDK inhibitor	CDK1|CDK2	-0.5926	1.2092	-1.5393
CPC002_VCAP_24H:BRD-K51918615-303-01-1:10	BRD-K51918615	iodophenpropit	VCAP	trt_cp	10 uM	24 h	3	351	0.35	0.35442	1	1	1	1	0	Histamine receptor antagonist	HRH3|HRH4|GRIN2B	-0.5925	1.2088	-1.5392
CPC014_A375_6H:N04	BRD-K73982490	BI-78D3	A375	trt_cp	10 uM	6 h	2	370	0.2987	0.336162	1	1	1	1	0	JNK inhibitor	MAPK8	-0.5925	1.2085	-1.5391
REP.B018_PC3_24H:O24	BRD-A67479912	progesterone	PC3	trt_cp	0.01 uM	24 h	2	132	0.2867	0.196712	1	1	1	1	0	Progesterone receptor agonist	PGR|CYP17A1|NR3C2|CYP2C19|CATSPER1|CATSPER2|CATSPER3|CATSPER4|ESR1|OPRK1|TRPC5	-0.5924	1.2079	-1.5389
REP.A017_HA1E_24H:H19	BRD-A64553394	DPI-201106	HA1E	trt_cp	10 uM	24 h	3	495	0.762	0.621027	1	1	1	1	0	Sodium channel activator	ADRB2	-0.5924	1.2079	-1.5389
CPC006_NCIH596_6H:BRD-K32330832-001-01-0:11.1	BRD-K32330832	VER-155008	NCIH596	trt_cp	12 uM	6 h	2	184	0.45	0.290968	0	0	1	1	0	HSP inhibitor	HSPA1A	-0.5923	1.2074	-1.5388
CPC005_A549_6H:BRD-K48735772-001-01-4:10	BRD-K48735772	PD-158780	A549	trt_cp	10 uM	6 h	3	615	0.26	0.404348	1	0	1	1	0	EGFR inhibitor	EGFR	-0.5922	1.1996	-1.5385
CPC018_A549_24H:BRD-K20742498-001-01-5:10	BRD-K20742498	RS-39604	A549	trt_cp	10 uM	24 h	2	181	0.24	0.210754	0	0	1	1	0	Serotonin receptor antagonist	HTR4	-0.5922	1.1994	-1.5384
CPC003_PC3_24H:BRD-K22503835-001-06-0:10	BRD-K22503835	scriptaid	PC3	trt_cp	10 uM	24 h	5	740	0.76	0.758321	0	0	1	1	0	HDAC inhibitor	HDAC1|HDAC2|HDAC3|HDAC4|HDAC5|HDAC6|HDAC7|HDAC8|HDAC9	-0.5919	1.1982	-1.5377
CPC004_VCAP_24H:L24	BRD-K15933101	ropinirole	VCAP	trt_cp	10 uM	24 h	6	573	0.15	0.296451	0	0	1	1	0	Dopamine receptor agonist	DRD2|DRD3|ADRA2A|ADRA2B|ADRA2C|DRD1|DRD4|DRD5|HTR1A|HTR1B|HTR1D|HTR2A|HTR2B|HTR2C	-0.5918	1.1982	-1.5375
CPC014_NEU_24H:BRD-K49669041-001-02-7:10	BRD-K49669041	BX-912	NEU	trt_cp	10 uM	24 h	2	121	0.52	0.253644	0	0	1	1	0	PDK inhibitor	PDPK1|AKT2|CDK2|CHEK1|GSK3B|KDR|PDK1	-0.5918	1.1982	-1.5374
CPD003_MCF7_6H:BRD-K45995181-001-01-2:10	BRD-K45995181	auranofin	MCF7	trt_cp	10 uM	6 h	2	477	0.62	0.549902	0	0	1	1	0	NFKB inhibitor	TXNRD1|TXNRD2|IKBKB|PRDX5|TRPA1	-0.5917	1.1982	-1.5371
REP.A025_HT29_24H:B07	BRD-K97729603	pimecrolimus	HT29	trt_cp	10 uM	24 h	3	430	0.2571	0.336214	1	1	1	1	0	Calcineurin inhibitor	FKBP1A|CYP3A5|MTOR	-0.5917	1.1982	-1.5371
CPC016_A549_24H:BRD-A63546914-003-01-2:10	BRD-A63546914	Ro-04-5595	A549	trt_cp	10 uM	24 h	3	103	0.23	0.155637	0	0	1	1	0	Glutamate receptor antagonist	GRIN2B	-0.5917	1.1982	-1.5371
PCL001_A549_24H:BRD-K24821794:3.33	BRD-K24821794	SGC-CBP30	A549	trt_cp	3.33 uM	24 h	3	222	0.44	0.316034	0	0	1	1	0	Bromodomain inhibitor	CREBBP|EP300	-0.5917	1.1982	-1.537
REP.A018_YAPC_24H:B23	BRD-K62310379	fluticasone-propionate	YAPC	trt_cp	0.125 uM	24 h	3	266	0.4254	0.34015	0	0	1	1	0	Glucocorticoid receptor agonist	NR3C1|PGR|CYP3A5|CYP3A7|NR3C2|PLA2G4A	-0.5916	1.1981	-1.5369
REP.A028_HEK293_24H:J21	BRD-K95739795	tetrabenazine	HEK293	trt_cp	1.11 uM	24 h	2	114	0.0334	0.0623959	0	0	1	1	0	Vesicular monoamine transporter inhibitor	SLC18A2|DRD2|SLC18A1	-0.5915	1.1981	-1.5367
CPC004_HCC515_24H:BRD-A28746609-001-05-7:10	BRD-A28746609	paclitaxel	HCC515	trt_cp	10 uM	24 h	3	412	0.39	0.405333	1	1	1	1	0	Tubulin inhibitor	TUBB|NR1I2|ABCB1|CYP2C8|BCL2|MAP2|MAP4|MAPT|TLR4|TUBB1	-0.5915	1.1981	-1.5365
GMB001_HL60_24H:BRD-K21680192:10	BRD-K21680192	mitoxantrone	HL60	trt_cp	10 uM	24 h	4	506	0.64	0.575434	0	0	1	1	0	Topoisomerase inhibitor	TOP2A|PIM1	-0.5914	1.1978	-1.5363
REP.B007_HELA_24H:D12	BRD-K44366189	anacetrapib	HELA	trt_cp	0.01 uM	24 h	2	163	0.2369	0.198704	0	0	1	1	0	Cholesterol inhibitor	CETP	-0.5914	1.1978	-1.5363
PAC005_U2OS_6H:BRD-A62021152-003-01-8:10	BRD-A62021152	WAY-161503	U2OS	trt_cp	10 uM	6 h	2	17	0.07	0.0348822	1	0	1	1	0	Serotonin receptor agonist	HTR2C	-0.5914	1.1978	-1.5362
CPC018_HEPG2_6H:BRD-K17796732-001-02-0:10	BRD-K17796732	JWH-015	HEPG2	trt_cp	10 uM	6 h	3	116	0.09	0.103319	1	0	1	1	0	Cannabinoid receptor agonist	CNR2	-0.5913	1.1977	-1.5361
REP.A007_YAPC_24H:P21	BRD-A51964809	halofantrine	YAPC	trt_cp	1.11 uM	24 h	3	174	0.3764	0.25878	1	1	1	1	0	Antimalarial	CYP3A5|KCNH2|KCNN4	-0.5911	1.1974	-1.5356
REP.A028_YAPC_24H:F17	BRD-K93633846	hesperidin	YAPC	trt_cp	0.125 uM	24 h	2	232	0.2059	0.221005	0	0	1	1	0	Flavanone glycoside	CACNA1B	-0.591	1.1972	-1.5354
CPC004_A375_6H:BRD-K82562631-236-03-8:10	BRD-K82562631	tolmetin	A375	trt_cp	10 uM	6 h	3	242	0.02	0.0703482	1	0	1	1	0	Cyclooxygenase inhibitor	PTGS2|PTGS1	-0.591	1.1972	-1.5354
CPC005_HA1E_24H:BRD-A83937277-001-03-0:10	BRD-A83937277	mephenytoin	HA1E	trt_cp	10 uM	24 h	3	65	0.1	0.0815243	1	0	1	1	0	Hydantoin antiepileptic	SCN5A|CYP2C19|SCN10A|SCN11A|SCN1A|SCN2A|SCN3A|SCN4A|SCN7A|SCN8A|SCN9A	-0.591	1.1971	-1.5353
REP.B010_HT29_24H:J04	BRD-K13662825	dinaciclib	HT29	trt_cp	0.08 uM	24 h	2	206	0.3243	0.261359	1	1	1	1	0	CDK inhibitor	CDK1|CDK2|CDK9|CDK5|CCNT1	-0.591	1.1971	-1.5352
CPC004_VCAP_6H:BRD-K70914287-300-01-0:10	BRD-K70914287	BIBX-1382	VCAP	trt_cp	10 uM	6 h	4	199	0.34	0.263025	0	0	1	1	0	EGFR inhibitor|Tyrosine kinase inhibitor	EGFR|ERBB2	-0.591	1.1971	-1.5352
REP.B011_YAPC_24H:F01	BRD-A05186015	bupropion	YAPC	trt_cp	2.22 uM	24 h	2	333	0.4871	0.407251	0	0	1	1	0	Dopamine receptor antagonist	SLC6A2|SLC6A3|CYP2B6|CHRNA3	-0.5909	1.1968	-1.5351
MOAR007_A375_24H:A13	BRD-K16508793	diazepam	A375	trt_cp	10 uM	24 h	3	125	0.19	0.155834	1	1	1	1	0	Benzodiazepine receptor agonist	GABRA1|GABRA2|GABRA3|GABRA5|GABRA4|GABRA6|GABRB1|GABRB2|GABRB3|GABRD|GABRE|GABRG1|GABRG2|GABRG3|GABRP|GABRQ|CYP2C19|ADRA1A|GABRR1|GABRR2|GABRR3|TSPO	-0.5909	1.1967	-1.535
CPC006_THP1_6H:G02	BRD-K16406336	methylene-blue	THP1	trt_cp	10 uM	6 h	2	114	0.2957	0.185656	0	0	1	1	0	Nitric oxide production inhibitor|Guanylyl cyclase inhibitor|Monoamine oxidase inhibitor|Tau aggregation inhibitor	ACHE|MAPT	-0.5908	1.1965	-1.5348
CPC017_ASC_24H:BRD-K28806945-001-01-9:10	BRD-K28806945	L-750667	ASC	trt_cp	10 uM	24 h	4	89	0.14	0.112873	1	0	1	1	0	Dopamine receptor antagonist	DRD4	-0.5908	1.1966	-1.5348
CPC017_ASC_24H:BRD-K62353524-001-01-8:10	BRD-K62353524	DY-131	ASC	trt_cp	10 uM	24 h	4	179	0.38	0.263724	1	1	1	1	0	Estrogen receptor agonist	ESRRG|ESRRB|ESR2	-0.5908	1.1964	-1.5347
CPC005_HT29_24H:BRD-K56509348-003-01-3:10	BRD-K56509348	BMS-182874	HT29	trt_cp	10 uM	24 h	3	108	0.14	0.124339	1	0	1	1	0	Endothelin receptor antagonist	EDNRA	-0.5907	1.1961	-1.5345
CPC016_NPC_24H:BRD-K31054881-300-01-3:10	BRD-K31054881	BMY-7378	NPC	trt_cp	10 uM	24 h	4	308	0.39	0.35046	0	0	1	1	0	Adrenergic receptor antagonist|Serotonin receptor antagonist	HTR1A|ADRA1D|ADRA1A|ADRA1B	-0.5907	1.1961	-1.5344
REP.B027_YAPC_24H:I07	BRD-K97181089	amiloride	YAPC	trt_cp	2.22 uM	24 h	2	71	0.2763	0.141628	1	1	1	1	0	Sodium channel inhibitor	SCNN1A|ASIC1|ASIC2|SCNN1B|SCNN1G|AOC1|ASIC3|PKD2|PKD2L1|PLAU|SCNN1D|SLC9A1|TRPC7|TRPV2	-0.5906	1.1959	-1.5343
CPC017_NPC_24H:BRD-K62609077-001-02-2:10	BRD-K62609077	scoulerine	NPC	trt_cp	10 uM	24 h	4	358	0.43	0.39674	0	0	1	1	0	Adrenergic receptor antagonist|GABA receptor antagonist|Serotonin receptor antagonist	ADRA1D|ADRA2A|GABRA1	-0.5906	1.1958	-1.5342
CPC011_VCAP_24H:BRD-K19462402-003-19-6:10	BRD-K19462402	buflomedil	VCAP	trt_cp	10 uM	24 h	5	179	0.15	0.165692	1	0	1	1	0	Adrenergic receptor antagonist|Calcium channel blocker	CACNA1C|ADRA1A	-0.5904	1.1953	-1.5338
CPC017_ASC_24H:BRD-K54759182-003-02-3:10	BRD-K54759182	dosulepin	ASC	trt_cp	10 uM	24 h	4	625	0.13	0.288232	0	0	1	1	0	Norepinephrine inhibitor|Serotonin reuptake inhibitor|Tricyclic antidepressant	SLC6A2|SLC6A4|CYP2C19|CHRM1|CHRM2|CHRM3|CHRM4|CHRM5|HRH1	-0.5904	1.1952	-1.5337
REP.B020_JURKAT_24H:I12	BRD-A86216746	varenicline	JURKAT	trt_cp	0.01 uM	24 h	2	207	0.1605	0.184312	0	0	1	1	0	Acetylcholine receptor agonist	CHRNA4|CHRNB2|CHRNA3|CHRNA6|CHRNA7	-0.5903	1.1947	-1.5335
CPC001_PC3_6H:BRD-K81876028-300-01-2:10	BRD-K81876028	CP-93129	PC3	trt_cp	10 uM	6 h	4	472	0.15	0.269059	1	0	1	1	0	Serotonin receptor agonist	HTR1B|HTR1A	-0.5903	1.1946	-1.5334
LIVB001_HUH7_72H:D17	BRD-K26521938	dinoprostone	HUH7	trt_cp	10 uM	72 h	3	92	0.05	0.0685819	0	0	1	1	0	Prostanoid receptor agonist	PTGER2|PTGER1|PTGER3|PTGER4|CATSPER1|CATSPER2|CATSPER3|CATSPER4|PTGDR|PTGDR2|PTGFR|TBXA2R	-0.59	1.1915	-1.5326
CPC018_HEPG2_6H:BRD-K14965640-001-03-3:10	BRD-K14965640	BRD-K14965640	HEPG2	trt_cp	10 uM	6 h	3	79	0.03	0.0492272	1	0	1	1	0	Cyclooxygenase inhibitor	PTGS2|PTGS1|ASIC1|BCL2|CFTR|FABP2|PLAT|PPARG|SLC5A8|THBD	-0.5899	1.1906	-1.5324
CPC017_ASC_24H:BRD-K68341547-003-01-6:10	BRD-K68341547	W-9	ASC	trt_cp	10 uM	24 h	4	48	0.19	0.0965668	1	0	1	1	0	Calmodulin inhibitor	CALM2	-0.5899	1.1907	-1.5324
CPC020_A375_6H:BRD-K55044200-001-11-2:10	BRD-K55044200	amoxicillin	A375	trt_cp	10 uM	6 h	5	402	0.34	0.373838	0	0	1	1	0	Penicillin binding protein inhibitor	SLC15A1|CYP2C19|SLC15A2|SLC22A6	-0.5897	1.1889	-1.532
REP.A027_PC3_24H:P01	BRD-K98004573	rupatadine	PC3	trt_cp	10 uM	24 h	3	257	0.3651	0.309744	0	0	1	1	0	Histamine receptor antagonist|Platelet activating factor receptor antagonist	HRH1|PTAFR	-0.5897	1.1887	-1.5319
REP.A028_THP1_24H:H07	BRD-A94276798	talinolol	THP1	trt_cp	10 uM	24 h	2	584	0.1699	0.318518	0	0	1	1	0	Adrenergic receptor antagonist	ADRB1	-0.5897	1.1887	-1.5319
CPC016_NPC_24H:BRD-K38477985-001-01-8:10	BRD-K38477985	malonoben	NPC	trt_cp	10 uM	24 h	2	662	0.77	0.721946	0	0	1	1	0	Protein tyrosine kinase inhibitor	EGFR	-0.5897	1.1887	-1.5319
CPC018_HT29_6H:BRD-K39965020-001-03-4:10	BRD-K39965020	doconexent	HT29	trt_cp	10 uM	6 h	5	165	0.21	0.188227	1	0	1	1	0	PPAR receptor agonist	PPARA|FFAR1|PTGS1|PTGS2	-0.5896	1.1884	-1.5318
CPC004_HT29_6H:BRD-A25687296-300-03-5:10	BRD-A25687296	emetine	HT29	trt_cp	10 uM	6 h	5	562	0.7	0.634231	0	0	1	1	0	Protein synthesis inhibitor	RPS2	-0.5897	1.1885	-1.5318
CPC017_A375_6H:BRD-A59943784-001-01-8:10	BRD-A59943784	fluticasone	A375	trt_cp	10 uM	6 h	3	305	0.03	0.0967255	0	0	1	1	0	Glucocorticoid receptor agonist	NR3C1|PGR	-0.5897	1.1885	-1.5318
CPC018_HEPG2_6H:BRD-A20126139-001-03-4:10	BRD-A20126139	medrysone	HEPG2	trt_cp	10 uM	6 h	3	86	0.16	0.118615	1	0	1	1	0	Glucocorticoid receptor agonist	NR3C1	-0.5896	1.1882	-1.5317
CPC016_HEPG2_6H:BRD-K00662280-001-04-5:10	BRD-K00662280	CL-218872	HEPG2	trt_cp	10 uM	6 h	3	85	0.23	0.141385	1	0	1	1	0	GABA receptor agonist	GABRA1|GABRA2|GABRA3|GABRA5|GABRB2|GABRG2	-0.5896	1.188	-1.5316
CPC017_HT29_6H:BRD-K34533029-001-01-0:10	BRD-K34533029	BRD-K34533029	HT29	trt_cp	10 uM	6 h	5	244	0.11	0.165662	0	0	1	1	0	EGFR inhibitor	EGFR	-0.5896	1.188	-1.5316
CPC014_HA1E_6H:BRD-K93331255-001-01-2:10	BRD-K93331255	lypressin	HA1E	trt_cp	10 uM	6 h	3	166	0.37	0.250603	1	1	1	1	0	Vasopressin receptor agonist	AVPR1A|AVPR1B|AVPR2	-0.5896	1.1882	-1.5316
CPC005_HCC515_6H:BRD-K55454768-001-01-8:10	BRD-K55454768	TAS-301	HCC515	trt_cp	10 uM	6 h	2	87	0.11	0.0989206	1	0	1	1	0	Calcium channel blocker	CAMK2A	-0.5895	1.1879	-1.5315
PBIOA014_HA1E_24H:C22	BRD-K21680192	mitoxantrone	HA1E	trt_cp	10 uM	24 h	2	469	0.38	0.426883	0	0	1	1	0	Topoisomerase inhibitor	TOP2A|PIM1	-0.5895	1.1876	-1.5314
CPC017_ASC_24H:BRD-K52459643-001-10-2:10	BRD-K52459643	alprostadil	ASC	trt_cp	10 uM	24 h	4	195	0.3	0.244573	1	1	1	1	0	Prostanoid receptor agonist	PTGER1|PTGER2|CATSPER1|CATSPER2|CATSPER3|CATSPER4|PTGDR|PTGER4|PTGIR	-0.5895	1.1876	-1.5314
CPC013_HCC515_6H:BRD-K47832606-001-13-7:10	BRD-K47832606	floxuridine	HCC515	trt_cp	10 uM	6 h	3	218	0.43	0.309594	0	0	1	1	0	DNA synthesis inhibitor	TYMS	-0.5895	1.1877	-1.5314
REP.A026_PC3_24H:O15	BRD-A65051990	acenocoumarol	PC3	trt_cp	1.11 uM	24 h	2	118	0.2207	0.163182	0	0	1	1	0	Vitamin K antagonist	VKORC1	-0.5895	1.1877	-1.5314
CPC018_SKB_24H:BRD-A34255068-001-16-2:10	BRD-A34255068	rolipram	SKB	trt_cp	10 uM	24 h	3	294	0.23	0.262947	0	0	1	1	0	Phosphodiesterase inhibitor	PDE4A|PDE4B|PDE4D|PDE4C	-0.5894	1.1865	-1.5311
CPC014_HCC515_6H:BRD-K99616396-001-01-0:10	BRD-K99616396	motesanib	HCC515	trt_cp	10 uM	6 h	3	129	0.19	0.158308	1	0	1	1	0	KIT inhibitor|PDGFR inhibitor|VEGFR inhibitor	FLT1|FLT4|KDR|KIT|PDGFRA|RET	-0.5893	1.186	-1.531
REP.B025_HT29_24H:H12	BRD-A73908300	EX-527	HT29	trt_cp	0.01 uM	24 h	2	180	0.2293	0.205432	0	0	1	1	0	SIRT inhibitor	SIRT1	-0.5893	1.1855	-1.5309
CPC013_ASC_24H:BRD-K13390322-001-01-4:10	BRD-K13390322	AT-7519	ASC	trt_cp	10 uM	24 h	3	607	0.7	0.659134	0	0	1	1	0	CDK inhibitor|Cell cycle inhibitor	CDK2|CDK1|CDK9|CDK4|CDK5|CDK6	-0.5893	1.1853	-1.5308
REP.A006_HA1E_24H:A07	BRD-K18895904	olanzapine	HA1E	trt_cp	10 uM	24 h	2	96	0.0802	0.0887265	0	0	1	1	0	Dopamine receptor antagonist|Serotonin receptor antagonist	DRD2|HTR2A|HTR2C|DRD3|DRD4|DRD1|HRH1|HTR1A|HTR1B|HTR1D|HTR1E|HTR6|HTR7|CYP2C8|ADRA1A|ADRA1B|ADRA2A|ADRA2B|ADRA2C|ADRB1|ADRB2|ADRB3|CHRM1|CHRM2|CHRM3|CHRM4|CHRM5|DRD5|GABRA1|GABRA2|GABRA3|GABRA4|GABRA5|GABRA6|GABRB1|GABRB2|GABRB3|GABRD|GABRE|GABRG1|GABRG2|GABRG3|GABRP|GABRQ|HRH2|HRH4|HTR1F|HTR2B|HTR3A|HTR5A	-0.5891	1.1733	-1.5303
CPC014_SKB_24H:BRD-K82091397-001-01-4:10	BRD-K82091397	SB-239063	SKB	trt_cp	10 uM	24 h	4	736	0.75	0.751277	0	0	1	1	0	P38 MAPK inhibitor	TNF|MAPK11|MAPK14|PTGS2	-0.589	1.1733	-1.53
CPC018_SKB_24H:BRD-A53576514-048-06-9:10	BRD-A53576514	orphenadrine	SKB	trt_cp	10 uM	24 h	3	117	0.2	0.154682	1	0	1	1	0	Acetylcholine receptor antagonist	CYP2B6|GRIN1|GRIN2D|GRIN3A|GRIN3B|HRH1|SCN10A|SLC6A2	-0.589	1.1733	-1.53
REP.B009_YAPC_24H:E07	BRD-K29530284	amlexanox	YAPC	trt_cp	2.22 uM	24 h	2	85	0.0797	0.0832279	1	1	1	1	0	Histamine receptor antagonist	FGF1|IL3|PDE4A|PDE4B|PDE4C|PDE4D|S100A12|S100A13	-0.589	1.1733	-1.53
CPC015_ASC_24H:BRD-K66874953-004-01-3:10	BRD-K66874953	pifithrin-alpha	ASC	trt_cp	10 uM	24 h	4	210	0.34	0.270196	0	0	1	1	0	p53 inhibitor	TP53	-0.589	1.1733	-1.53
CPC006_HCT116_6H:BRD-K04853698-003-01-4:10	BRD-K04853698	LDN-193189	HCT116	trt_cp	10 uM	6 h	2	572	0.8	0.684028	0	0	1	1	0	Serine/threonine kinase inhibitor	ACVR1|BMPR1A	-0.5888	1.1733	-1.5296
LJP008_HA1E_24H:O13	BRD-A50737080	CGK-733	HA1E	trt_cp	10 uM	24 h	2	287	0.5632	0.40654	1	1	1	1	0	ATM kinase inhibitor|ATR kinase inhibitor	ATM|ATR	-0.5888	1.1733	-1.5295
REP.B018_PC3_24H:A14	BRD-K62196610	AVN-944	PC3	trt_cp	0.74 uM	24 h	2	230	0.4081	0.309797	1	1	1	1	0	Inosine monophosphate dehydrogenase inhibitor	IMPDH2|IMPDH1	-0.5887	1.1733	-1.5294
LJP005_BT20_24H:H07	BRD-K03449891	foretinib	BT20	trt_cp	10 uM	24 h	3	231	0.46	0.329621	1	1	1	1	0	VEGFR inhibitor	KDR|MET|AXL|FLT3|KIT|MST1R|TEK|FLT1|FLT4	-0.5887	1.1733	-1.5294
LJP005_MCF10A_3H:E07	BRD-K93788137	PF-431396	MCF10A	trt_cp	10 uM	3 h	2	308	0.5633	0.421188	1	1	1	1	0	Focal adhesion kinase inhibitor	PTK2|PTK2B	-0.5887	1.1733	-1.5293
CPC010_VCAP_6H:BRD-K50938786-003-07-6:10	BRD-K50938786	ropivacaine	VCAP	trt_cp	10 uM	6 h	5	209	0.09	0.138684	1	0	1	1	0	Sodium channel inhibitor	SCN9A|SCN10A	-0.5887	1.1733	-1.5293
ERG020_VCAP_24H:BRD-K58299615:10	BRD-K58299615	Ro-90-7501	VCAP	trt_cp	10 uM	24 h	3	275	0.3	0.290441	1	1	1	1	0	Beta amyloid inhibitor	APP	-0.5887	1.1733	-1.5292
REP.A012_HA1E_24H:C09	BRD-A00546892	biperiden	HA1E	trt_cp	1.11 uM	24 h	3	132	0.1201	0.127318	1	1	1	1	0	Acetylcholine receptor antagonist	CHRM1|CHRM2|CHRM3|CHRM4|CHRM5|CHRNA2	-0.5886	1.1733	-1.5291
REP.B006_HELA_24H:O07	BRD-A24191444	ifenprodil	HELA	trt_cp	2.22 uM	24 h	2	133	0.2099	0.168952	1	0	1	1	0	Adrenergic receptor antagonist|Glutamate receptor antagonist	GRIN1|GRIN2B	-0.5886	1.1733	-1.5291
AICHI002_MINO_24H:M12	BRD-K13662825	dinaciclib	MINO	trt_cp	0.01 uM	24 h	3	851	0.85	0.860013	0	0	1	1	0	CDK inhibitor	CDK1|CDK2|CDK9|CDK5|CCNT1	-0.5885	1.1733	-1.5289
REP.B013_MCF10A_24H:G20	BRD-K40758068	efavirenz	MCF10A	trt_cp	0.74 uM	24 h	2	418	0.6819	0.539857	0	0	1	1	0	HIV inhibitor	CYP2B6|CYP2C19|CYP3A4|CYP2C8|CYP3A5|CYP1A2|CYP2C9|CYP2D6	-0.5885	1.1733	-1.5288
REP.A025_JURKAT_24H:L14	BRD-K77561571	topiroxostat	JURKAT	trt_cp	3.33 uM	24 h	2	100	0.2172	0.149025	0	0	1	1	0	Xanthine oxidase inhibitor	XDH	-0.5885	1.1733	-1.5287
REP.B009_YAPC_24H:F24	BRD-K29968218	KX-2391	YAPC	trt_cp	0.01 uM	24 h	2	158	0.3163	0.226052	0	0	1	1	0	Src inhibitor|Tubulin inhibitor	SRC	-0.5884	1.1733	-1.5285
CPC018_SKB_24H:BRD-K03981224-001-02-9:10	BRD-K03981224	ethisterone	SKB	trt_cp	10 uM	24 h	3	208	0.19	0.20102	1	0	1	1	0	Progestogen hormone	TYR	-0.5884	1.1733	-1.5285
REP.B012_HUVEC.A_24H:C12	BRD-A00546892	biperiden	HUVEC	trt_cp	0.01 uM	24 h	2	91	0.0555	0.0718617	0	0	1	1	0	Acetylcholine receptor antagonist	CHRM1|CHRM2|CHRM3|CHRM4|CHRM5|CHRNA2	-0.5883	1.1733	-1.5283
CPC017_A549_24H:BRD-K05151076-001-01-8:10	BRD-K05151076	ZK-164015	A549	trt_cp	10 uM	24 h	3	344	0.54	0.43582	1	1	1	1	0	Estrogen receptor antagonist	ESR1|ESR2	-0.5883	1.1733	-1.5283
REP.A017_YAPC_24H:E07	BRD-K62387885	basimglurant	YAPC	trt_cp	10 uM	24 h	3	158	0.2939	0.217901	1	1	1	1	0	Glutamate receptor antagonist	GRM5	-0.5882	1.1733	-1.5279
CPC004_A375_6H:BRD-K03670461-001-02-0:10	BRD-K03670461	BRD-K03670461	A375	trt_cp	10 uM	6 h	3	429	0.35	0.391826	1	0	1	1	0	EGFR inhibitor	EGFR	-0.588	1.1733	-1.5276
REP.A025_MCF10A_24H:F24	BRD-K91301684	noscapine	MCF10A	trt_cp	0.04 uM	24 h	3	150	0.3532	0.232748	1	1	1	1	0	Bradykinin receptor antagonist|Tubulin polymerization inhibitor	BDKRB2|SIGMAR1	-0.588	1.1733	-1.5275
REP.B008_PC3_24H:E03	BRD-K32318651	acyclovir	PC3	trt_cp	0.25 uM	24 h	2	58	0.0162	0.0309957	0	0	1	1	0	DNA inhibitor	PNP	-0.5878	1.1733	-1.527
CPC014_NEU_24H:BRD-K84937637-001-03-2:10	BRD-K84937637	sirolimus	NEU	trt_cp	10 uM	24 h	2	127	0.18	0.152886	0	0	1	1	0	MTOR inhibitor	MTOR|FKBP1A|CCR5|FGF2	-0.5878	1.1733	-1.5269
REP.A028_HELA_24H:P01	BRD-K97399794	quercetin	HELA	trt_cp	10 uM	24 h	3	464	0.6544	0.5572	1	1	1	1	0	Polar auxin transport inhibitor	PIK3CG|AKR1B1|CYP2C8|EGFR|GAA|MAOA|PTPN1|SCN5A|SIRT1|XDH|ATP5A1|ATP5B|ATP5C1|HCK|HIBCH|PIM1|STK17B|UGT3A1	-0.5878	1.1733	-1.5269
CPC004_HCC515_6H:BRD-A91008255-003-16-4:10	BRD-A91008255	bepridil	HCC515	trt_cp	10 uM	6 h	3	35	0.21	0.086691	1	0	1	1	0	Calcium channel blocker	CACNA1C|SCN5A|ATP1A1|CACNA1A|CACNA1H|CACNA2D2|CALM1|KCNQ1|KCNQ4|PDE1A|PDE1B|TNNC1	-0.5878	1.1733	-1.5269
REP.A018_MDAMB231_24H:D01	BRD-K62562723	SR-2640	MDAMB231	trt_cp	10 uM	24 h	3	184	0.291	0.233984	0	0	1	1	0	Leukotriene receptor antagonist	CYSLTR1	-0.5877	1.1732	-1.5268
REP.B007_HELA_24H:C02	BRD-K43723251	chenodiol	HELA	trt_cp	0.74 uM	24 h	2	298	0.429	0.361549	0	0	1	1	0	11-beta-HSD1 inhibitor	HSD11B1	-0.5877	1.1732	-1.5268
CPC014_VCAP_6H:BRD-K74514084-003-01-9:10	BRD-K74514084	pazopanib	VCAP	trt_cp	10 uM	6 h	5	145	0.11	0.127706	0	0	1	1	0	VEGFR inhibitor|KIT inhibitor|PDGFR inhibitor	KDR|KIT|FLT1|FLT4|PDGFRB|PDGFRA|BRAF|CYP2B6|CYP2C8|CYP2E1|DDR2|CSF1R|FGF1|FGFR1|FGFR3|ITK|SH2B3	-0.5877	1.1731	-1.5267
LJP002_MCF7_6H:BRD-K61860715-001-01-2:10	BRD-K61860715	ZG-10	MCF7	trt_cp	10 uM	6 h	3	451	0.59	0.521609	0	0	1	1	0	JNK inhibitor	IRAK1	-0.5876	1.173	-1.5265
CPC014_PC3_24H:BRD-K80725632-001-04-8:10	BRD-K80725632	lavendustin-c	PC3	trt_cp	10 uM	24 h	5	500	0.65	0.576464	0	0	1	1	0	EGFR inhibitor	CAMK2A|EGFR|SRC	-0.5876	1.1731	-1.5265
REP.B023_HEK293_24H:N20	BRD-K72166146	BRD-K72166146	HEK293	trt_cp	0.74 uM	24 h	2	163	0.039	0.0806226	0	0	1	1	0	Serotonin receptor agonist	HTR1D|HTR1B|ADRA2A|DRD2|HTR1E|HTR1F|HTR2B|HTR7	-0.5876	1.1718	-1.5264
CPC016_NEU_24H:BRD-K05528470-305-01-4:10	BRD-K05528470	L-745870	NEU	trt_cp	10 uM	24 h	3	159	0.47	0.276425	0	0	1	1	0	Dopamine receptor antagonist	DRD4|DRD1|DRD2|DRD3|HTR1A|HTR2A|HTR6|HTR7	-0.5876	1.1722	-1.5264
REP.A027_PC3_24H:J01	BRD-K97158071	droperidol	PC3	trt_cp	10 uM	24 h	3	235	0.1991	0.218726	0	0	1	1	0	Dopamine receptor antagonist	DRD2|ADRA1A|DRD3|DRD4|HTR2A	-0.5875	1.1704	-1.5263
REP.A001_HELA_24H:E19	BRD-A26711594	nicardipine	HELA	trt_cp	10 uM	24 h	3	146	0.3026	0.21254	1	1	1	1	0	Calcium channel blocker	CACNA1C|ADORA3|ADRA1A|ADRA1B|ADRA1D|CACNA1D|CACNA2D1|CACNB2|CALM1|CHRM1|CHRM2|CHRM3|CHRM4|CHRM5|PDE1A|PDE1B	-0.5876	1.1716	-1.5263
CRCGN016_MCF10A.WT.HP_24H:BRD-K81839095:11.3504	BRD-K81839095	estrone	MCF10A	trt_cp	12 uM	24 h	3	179	0.25	0.213908	1	0	1	1	0	Estrogen receptor agonist	ESR1|ESR2	-0.5875	1.1693	-1.5262
REP.B027_HA1E_24H:B16	BRD-K92657060	zaleplon	HA1E	trt_cp	0.08 uM	24 h	2	354	0.1269	0.21432	1	0	1	1	0	Benzodiazepine receptor agonist	GABRA1|AOX1|GABRB1|GABRG2|TSPO	-0.5875	1.1676	-1.5261
PBIOA016_HT29_24H:H01	BRD-A85667082	fulvestrant	HT29	trt_cp	10 uM	24 h	3	253	0.43	0.333522	1	1	1	1	0	Estrogen receptor antagonist	ESR1|EPHX2|ESR2|GPER1	-0.5874	1.1667	-1.5259
CPC016_SKB_24H:BRD-K07762753-001-02-8:10	BRD-K07762753	aminopurvalanol-a	SKB	trt_cp	10 uM	24 h	3	437	0.65	0.538925	0	0	1	1	0	Tyrosine kinase inhibitor|CDK inhibitor	CDK2|CDK1|CDK5|CDK6	-0.5874	1.1667	-1.5258
REP.A006_MCF7_24H:C01	BRD-K19412355	SB-242235	MCF7	trt_cp	10 uM	24 h	3	308	0.5341	0.410126	1	1	1	1	0	P38 MAPK inhibitor	HSPB1|MAPK14	-0.5873	1.1667	-1.5257
CPC003_HA1E_6H:BRD-K06221026-001-03-5:10	BRD-K06221026	DUP-697	HA1E	trt_cp	10 uM	6 h	2	239	0.51	0.353032	0	0	1	1	0	Cyclooxygenase inhibitor	PTGS2	-0.5873	1.1667	-1.5256
CPC006_SW480_6H:BRD-K50590187-001-10-8:160	BRD-K50590187	capsaicin	SW480	trt_cp	150 uM	6 h	2	131	0.07	0.0968312	0	0	1	1	0	TRPV agonist	TRPV1|ENOX2|CFTR	-0.5872	1.1667	-1.5255
REP.A012_MCF10A_24H:I07	BRD-K02113016	olaparib	MCF10A	trt_cp	10 uM	24 h	3	140	0.2727	0.197577	1	1	1	1	0	PARP inhibitor	PARP1|PARP2|PARP3	-0.5872	1.1667	-1.5255
REP.A010_HELA_24H:P13	BRD-K15409150	penfluridol	HELA	trt_cp	10 uM	24 h	2	712	0.8368	0.780515	0	0	1	1	0	Calcium channel blocker	DRD1|DRD2|CACNA1G	-0.5872	1.1667	-1.5255
REP.B011_YAPC_24H:G24	BRD-K05977355	fluconazole	YAPC	trt_cp	0.01 uM	24 h	2	126	0.1922	0.157359	0	0	1	1	0	Sterol demethylase inhibitor	CYP3A5|CYP3A7|CYP51A1	-0.5871	1.1667	-1.5251
REP.B005_A375_24H:K19	BRD-K10852020	tolcapone	A375	trt_cp	2.22 uM	24 h	3	90	0.1575	0.12039	1	0	1	1	0	Catechol O methyltransferase inhibitor	COMT|TTR	-0.587	1.1667	-1.5249
CPC016_HEPG2_6H:BRD-K67537649-001-01-1:10	BRD-K67537649	PQ-401	HEPG2	trt_cp	10 uM	6 h	3	231	0.26	0.247813	1	0	1	1	0	IGF-1 inhibitor	IGF1R	-0.5869	1.1664	-1.5245
CPC004_PC3_6H:BRD-A09467419-003-14-1:10	BRD-A09467419	mebeverine	PC3	trt_cp	10 uM	6 h	5	570	0.12	0.264459	1	0	1	1	0	Acetylcholine receptor antagonist	CHRM1|CHRM2|CHRM3|CHRM4	-0.5869	1.1664	-1.5245
REP.B024_HA1E_24H:C01	BRD-K74065929	doramapimod	HA1E	trt_cp	2.22 uM	24 h	2	172	0.2926	0.226846	1	1	1	1	0	P38 MAPK inhibitor	MAPK14|MAPK11|MAPK12|DDR2|MAPK13	-0.5868	1.1662	-1.5244
LJP007_THP1_24H:G19	BRD-K09186807	KIN001-244	THP1	trt_cp	10 uM	24 h	3	123	0.273	0.185295	1	1	1	1	0	PDK1 Inhibitor	PDPK1	-0.5868	1.1662	-1.5244
CPC015_ASC_24H:BRD-A34806832-001-02-7:10	BRD-A34806832	proscillaridin	ASC	trt_cp	10 uM	24 h	4	600	0.65	0.631485	0	0	1	1	0	Na/K-ATPase inhibitor	ATP1A1	-0.5868	1.1663	-1.5244
CPC015_SKB_24H:BRD-K32247306-001-17-9:10	BRD-K32247306	primidone	SKB	trt_cp	10 uM	24 h	2	176	0.17	0.174909	0	0	1	1	0	GABA receptor antagonist	GABRA1|GABRA2|GABRA3|GABRA4|GABRA5|GABRA6|GABRB1|GABRB2|GABRB3|GABRD|GABRE|GABRG1|GABRG2|GABRG3|GABRP|GABRQ|CHRNA4|CHRNA7|GRIA2|GRIK2|SCN10A|SCN11A|SCN1A|SCN2A|SCN3A|SCN4A|SCN5A|SCN7A|SCN8A|SCN9A	-0.5868	1.1663	-1.5244
CPC017_NPC_24H:BRD-K73397362-001-01-7:10	BRD-K73397362	purmorphamine	NPC	trt_cp	10 uM	24 h	4	206	0.13	0.165476	1	1	1	1	0	Smoothened receptor agonist	SMO|DHH|IHH|PTCH1	-0.5867	1.1655	-1.5241
CPC018_MCF7_24H:BRD-K05361803-001-01-3:10	BRD-K05361803	SC-10	MCF7	trt_cp	10 uM	24 h	4	114	0.11	0.113235	1	0	1	1	0	Protein kinase activator	PRKCA	-0.5866	1.1649	-1.5239
CPC014_NEU_24H:BRD-K77008974-001-01-6:10	BRD-K77008974	WYE-354	NEU	trt_cp	10 uM	24 h	2	197	0.41	0.287379	0	0	1	1	0	MTOR inhibitor	MTOR	-0.5866	1.165	-1.5239
REP.A028_YAPC_24H:M19	BRD-K97010173	deferasirox	YAPC	trt_cp	10 uM	24 h	2	346	0.5511	0.441554	0	0	1	1	0	Chelating agent	CYP2C19|CYP2C8|CYP3A4	-0.5866	1.1645	-1.5238
LPROT002_A549_6H:BRD-K80738081:10	BRD-K80738081	resveratrol	A549	trt_cp	10 uM	6 h	3	301	0.58	0.422501	1	1	1	1	0	Cytochrome P450 inhibitor|SIRT activator	PTGS1|SIRT1|PTGS2|APOA1|BACE1|MAOA|SCN5A|TXNRD1|TXNRD2|XDH|CSNK2A1|NQO2	-0.5866	1.1646	-1.5238
CPC002_PC3_6H:BRD-K26429091-051-01-9:10	BRD-K26429091	J-104129	PC3	trt_cp	10 uM	6 h	5	563	0.05	0.169656	0	0	1	1	0	Acetylcholine receptor antagonist	CHRM3	-0.5865	1.1643	-1.5237
REP.A028_HELA_24H:K01	BRD-K95901403	XL-147	HELA	trt_cp	10 uM	24 h	3	378	0.5725	0.470397	1	1	1	1	0	PI3K inhibitor	PIK3CG|PIK3CA|PIK3CD	-0.5865	1.1637	-1.5236
CPC006_A375_24H:BRD-K61323504-001-03-2:11.1	BRD-K61323504	SB-225002	A375	trt_cp	12 uM	24 h	5	439	0.61	0.523272	1	1	1	1	0	CC chemokine receptor antagonist	CXCR2	-0.5864	1.1629	-1.5235
CPC013_NEU_24H:BRD-K15600710-066-01-7:10	BRD-K15600710	obatoclax	NEU	trt_cp	10 uM	24 h	2	53	0.11	0.0772085	0	0	1	1	0	BCL inhibitor	BCL2|BCL2L1|MCL1	-0.5865	1.1634	-1.5235
LJP005_HCC515_24H:G03	BRD-K04853698	LDN-193189	HCC515	trt_cp	1.11 uM	24 h	3	205	0.43	0.300221	1	1	1	1	0	Serine/threonine kinase inhibitor	ACVR1|BMPR1A	-0.5864	1.1617	-1.5233
CPC006_NCIH508_6H:BRD-K32405725-001-01-0:88.8	BRD-K32405725	etomoxir	NCIH508	trt_cp	90 uM	6 h	2	535	0.26	0.377133	0	0	1	1	0	Carnitine palmitoyltransferase inhibitor	CPT1A|CPT1B	-0.5864	1.162	-1.5233
REP.A021_HA1E_24H:E19	BRD-A82396632	miconazole	HA1E	trt_cp	10 uM	24 h	3	791	0.8078	0.808297	1	1	1	1	0	Bacterial cell wall synthesis inhibitor	CYP19A1|KCNH2|KCNH6|KCNH7|KCNMA1|KCNMB1|KCNMB2|KCNMB3|KCNMB4|KCNN1|KCNN2|KCNN3|KCNN4|NOS2|NOS3|TRPM2|TRPV5	-0.5864	1.16	-1.5232
CPC018_HEPG2_6H:BRD-K39670393-303-01-3:10	BRD-K39670393	amthamine	HEPG2	trt_cp	10 uM	6 h	3	91	0.06	0.0747183	1	0	1	1	0	Histamine receptor agonist	HRH2	-0.5863	1.1586	-1.5231
CPC003_HCC515_24H:BRD-K66874953-004-01-3:10	BRD-K66874953	pifithrin-alpha	HCC515	trt_cp	10 uM	24 h	3	204	0.3	0.250153	1	1	1	1	0	p53 inhibitor	TP53	-0.5863	1.158	-1.523
CPC011_PC3_6H:BRD-K79511609-001-17-6:10	BRD-K79511609	BRD-K79511609	PC3	trt_cp	10 uM	6 h	4	334	0.46	0.396354	1	1	1	1	0	Adenosine receptor agonist	ADORA1|ADORA2A|ADORA2B	-0.5862	1.1573	-1.5229
LJP008_SKL_24H:G19	BRD-K03406345	azacitidine	SKL	trt_cp	10 uM	24 h	3	474	0.7017	0.58317	1	1	1	1	0	DNA inhibitor	DNMT1|DNMT3A	-0.5862	1.1575	-1.5229
REP.A027_MCF10A_24H:L06	BRD-K93461745	buspirone	MCF10A	trt_cp	0.04 uM	24 h	3	169	0.2629	0.213142	0	0	1	1	0	Serotonin receptor agonist	HTR1A|DRD2	-0.5862	1.1565	-1.5227
CPC014_NPC_24H:BRD-K97764662-001-09-0:10	BRD-K97764662	PD-173074	NPC	trt_cp	10 uM	24 h	3	541	0.66	0.604228	0	0	1	1	0	FGFR inhibitor|VEGFR inhibitor	FGFR1|FGFR3|FGFR2|FGFR4|FLT1|FLT4|KDR|PDGFRA|PDGFRB	-0.5861	1.1563	-1.5226
CPC011_HT29_6H:BRD-K33312228-001-04-3:10	BRD-K33312228	halometasone	HT29	trt_cp	10 uM	6 h	4	304	0.3	0.305371	0	0	1	1	0	Glucocorticoid receptor agonist	NR3C1	-0.5861	1.1563	-1.5226
CPC016_ASC_24H:BRD-K54210043-001-02-0:10	BRD-K54210043	NS-1619	ASC	trt_cp	10 uM	24 h	3	87	0.12	0.103319	1	0	1	1	0	Calcium channel activator	KCNMA1	-0.5861	1.1559	-1.5225
CPC006_MCF7_6H:BRD-K68336408-001-04-2:56.78	BRD-K68336408	BRD-K68336408	MCF7	trt_cp	60 uM	6 h	5	396	0.53	0.463251	1	1	1	1	0	EGFR inhibitor	EGFR|MAPK14	-0.586	1.1558	-1.5224
CPC011_A375_6H:BRD-K37270826-001-20-1:10	BRD-K37270826	mifepristone	A375	trt_cp	10 uM	6 h	3	531	0.28	0.389903	0	0	1	1	0	Glucocorticoid receptor antagonist|Progesterone receptor antagonist	PGR|NR3C1|AR|CYP2B6|CYP2C8|CYP3A5|CYP3A7|NR1I2	-0.586	1.1559	-1.5224
REP.A017_MDAMB231_24H:C07	BRD-K45542189	diethylcarbamazine	MDAMB231	trt_cp	10 uM	24 h	3	119	0.1555	0.137553	0	0	1	1	0	Lipoxygenase inhibitor	ALOX5|PTGS1	-0.586	1.1557	-1.5223
CPC015_ASC_24H:BRD-A68930007-001-03-1:10	BRD-A68930007	ouabain	ASC	trt_cp	10 uM	24 h	4	566	0.68	0.627326	0	0	1	1	0	Na/K-ATPase inhibitor	ATP1A1|ATP1A2|ATP1A3|ATP1A4|ATP1B1|ATP1B2|ATP1B3|ATP1B4|FXYD2	-0.586	1.1554	-1.5222
LJP009_A549_24H:C23	BRD-K79090631	CGP-60474	A549	trt_cp	0.12 uM	24 h	2	612	0.5323	0.577144	0	0	1	1	0	CDK inhibitor	CDK1|CDK2	-0.586	1.1554	-1.5222
REP.A017_HELA_24H:O11	BRD-K64874225	NSC-4644	HELA	trt_cp	0.06 uM	24 h	3	234	0.2211	0.230003	1	1	1	1	0	ACAT inhibitor|Sterol regulatory element binding protein (SREBP) inhibitor	SOAT1|PYGM	-0.5858	1.1546	-1.5218
LJP002_HS578T_6H:BRD-K91900765-001-02-7:10	BRD-K91900765	VX-745	HS578T	trt_cp	10 uM	6 h	3	155	0.19	0.173529	0	0	1	1	0	P38 MAPK inhibitor	MAPK14|MAPK11|MAPK12	-0.5858	1.1545	-1.5217
REP.A017_PC3_24H:G08	BRD-K63550407	erythromycin	PC3	trt_cp	3.33 uM	24 h	3	102	0.1418	0.12161	1	0	1	1	0	NFKB inhibitor	MLNR	-0.5858	1.1546	-1.5217
REP.B010_MCF10A_24H:N24	BRD-K01638814	rilmenidine	MCF10A	trt_cp	0.01 uM	24 h	2	131	0.4127	0.235117	0	0	1	1	0	Adrenergic receptor agonist|Imidazoline receptor agonist	NISCH|ADRA2A	-0.5857	1.1543	-1.5216
CPC018_PHH_24H:BRD-K77554836-001-03-3:10	BRD-K77554836	triamcinolone	PHH	trt_cp	10 uM	24 h	3	87	0.19	0.130007	0	0	1	1	0	Glucocorticoid receptor agonist	NR3C1|SERPINA6	-0.5856	1.153	-1.5213
REP.A008_PC3_24H:A12	BRD-A68009927	daunorubicin	PC3	trt_cp	0.04 uM	24 h	2	101	0.2722	0.167662	0	0	1	1	0	RNA synthesis inhibitor|Topoisomerase inhibitor	TOP2A|TOP2B	-0.5855	1.1411	-1.521
CPC015_SKB_24H:BRD-K21450440-001-08-8:10	BRD-K21450440	benzthiazide	SKB	trt_cp	10 uM	24 h	2	237	0.34	0.287041	0	0	1	1	0	Carbonic anhydrase inhibitor	CA2|SLC12A3|CA1|CA12|CA4|CA9	-0.5855	1.1411	-1.5209
CPC014_SKB_24H:BRD-K73293050-001-01-5:10	BRD-K73293050	WZ-3146	SKB	trt_cp	10 uM	24 h	3	419	0.5	0.462831	0	0	1	1	0	EGFR inhibitor	EGFR	-0.5854	1.1399	-1.5208
REP.B013_HEK293_24H:J07	BRD-K41410256	balsalazide	HEK293	trt_cp	2.22 uM	24 h	2	240	0.3577	0.296275	1	1	1	1	0	Cyclooxygenase inhibitor	PTGS1|PTGS2|ALOX5|PPARG	-0.5854	1.14	-1.5208
CPC015_A549_24H:BRD-K79366068-236-01-5:10	BRD-K79366068	PSB-069	A549	trt_cp	10 uM	24 h	3	455	0.17	0.281229	0	0	1	1	0	NTPDase inhibitor	ENTPD1|ENTPD2|ENTPD3	-0.5854	1.1396	-1.5207
CPC018_A375_6H:BRD-K26429091-051-01-9:10	BRD-K26429091	J-104129	A375	trt_cp	10 uM	6 h	5	242	0.22	0.233319	0	0	1	1	0	Acetylcholine receptor antagonist	CHRM3	-0.5853	1.1391	-1.5204
CPC010_A549_24H:BRD-K06221026-001-05-0:10	BRD-K06221026	DUP-697	A549	trt_cp	10 uM	24 h	2	124	0.03	0.061674	0	0	1	1	0	Cyclooxygenase inhibitor	PTGS2	-0.5852	1.1389	-1.5203
REP.A028_YAPC_24H:P09	BRD-A97437073	rosiglitazone	YAPC	trt_cp	1.11 uM	24 h	2	184	0.4025	0.275184	0	0	1	1	0	PPAR receptor agonist|Insulin sensitizer	PPARG|CYP2C8|INS|ACSL4|FFAR1|TRPC5|TRPM3	-0.5852	1.1385	-1.5202
CPC014_A375_6H:L12	BRD-K77286328	reversine	A375	trt_cp	10 uM	6 h	2	114	0.3892	0.212995	1	1	1	1	0	Aurora kinase inhibitor	AURKB|ADORA3|AURKA|INCENP|MAP2K1	-0.5851	1.138	-1.52
REP.A007_HELA_24H:B13	BRD-K42805893	AZD-9291	HELA	trt_cp	10 uM	24 h	3	293	0.5369	0.401062	1	1	1	1	0	EGFR inhibitor	EGFR	-0.585	1.1352	-1.5198
REP.B011_A549_24H:A18	BRD-A03623303	metoprolol	A549	trt_cp	0.01 uM	24 h	2	92	0.0719	0.0822411	0	0	1	1	0	Adrenergic receptor antagonist	ADRB1|ADRB2	-0.585	1.1344	-1.5197
REP.A003_JURKAT_24H:B09	BRD-K31135544	IB-MECA	JURKAT	trt_cp	1.11 uM	24 h	2	426	0.8152	0.595892	0	0	1	1	0	Adenosine receptor agonist	ADORA3|ADORA1|ADORA2A|ADORA2B	-0.585	1.1337	-1.5196
CPC018_MCF7_24H:BRD-K32292990-001-01-0:10	BRD-K32292990	CGP-53353	MCF7	trt_cp	10 uM	24 h	4	265	0.41	0.333308	1	1	1	1	0	EGFR inhibitor|PKC inhibitor	EGFR|PRKCB	-0.5849	1.1328	-1.5195
PAC001_U2OS_6H:BRD-K68341547-003-01-6:10	BRD-K68341547	W-9	U2OS	trt_cp	10 uM	6 h	2	234	0.47	0.335342	0	0	1	1	0	Calmodulin inhibitor	CALM2	-0.5849	1.1322	-1.5194
CPC006_U937_6H:BRD-A71390734-001-01-7:0.08	BRD-A71390734	idarubicin	U937	trt_cp	0.08 uM	6 h	2	280	0.28	0.283132	1	1	1	1	0	Topoisomerase inhibitor	TOP2A	-0.5849	1.1322	-1.5194
REP.A022_MDAMB231_24H:L19	BRD-K68488863	ENMD-2076	MDAMB231	trt_cp	10 uM	24 h	3	518	0.6292	0.577284	0	0	1	1	0	Aurora kinase inhibitor|FLT3 inhibitor|VEGFR inhibitor	AURKA|FLT3|KDR|PDGFRA|SRC|CSF1R|EPHA1|FGFR1|FGFR2|FGFR3|FLT4|KIT|PTK2	-0.5848	1.1318	-1.5193
REP.A013_HELA_24H:M01	BRD-K42948882	AMD-11070	HELA	trt_cp	10 uM	24 h	3	515	0.5961	0.560265	0	0	1	1	0	CC chemokine receptor antagonist	CXCR4	-0.5847	1.1309	-1.519
CPC015_ASC_24H:BRD-K85119730-001-17-2:10	BRD-K85119730	tolbutamide	ASC	trt_cp	10 uM	24 h	4	153	0.25	0.197764	0	0	1	1	0	ATP channel blocker	ABCC8|KCNJ11|CYP2B6|CYP2C19|CYP2C8|KCNJ1|KCNJ8	-0.5847	1.1297	-1.5189
CPC014_PHH_24H:BRD-K26674531-001-01-3:10	BRD-K26674531	GR-235	PHH	trt_cp	10 uM	24 h	4	64	0.06	0.0626608	0	0	1	1	0	Estrogen receptor agonist|FXR antagonist|Progesterone receptor agonist	NR1H4|ESR1|IKBKB|NR1I2|PGR	-0.5847	1.1297	-1.5189
CPC004_HCC515_24H:BRD-A85025557-001-01-7:10	BRD-A85025557	NCS-382	HCC515	trt_cp	10 uM	24 h	3	78	0.26	0.144001	1	0	1	1	0	GABA receptor antagonist	GABBR1|GABBR2|SLC52A2	-0.5846	1.1282	-1.5187
REP.B026_HELA_24H:D24	BRD-K88611939	aniracetam	HELA	trt_cp	0.01 uM	24 h	2	156	0.0391	0.0789735	1	0	1	1	0	Glutamate receptor agonist	GRIA1|DRD2|GRIA2|GRIA3|HTR2A|GRIA4	-0.5846	1.1246	-1.5186
REP.A002_PC3_24H:D24	BRD-K16295392	atrasentan	PC3	trt_cp	0.04 uM	24 h	3	114	0.171	0.141183	1	1	1	1	0	Endothelin receptor antagonist	EDNRA	-0.5845	1.12	-1.5185
REP.B023_A549_24H:E09	BRD-A68888262	azelastine	A549	trt_cp	0.25 uM	24 h	2	161	0.1279	0.145104	0	0	1	1	0	Histamine receptor antagonist	HRH1|CYP2C19	-0.5845	1.1202	-1.5185
CPC017_NPC_24H:BRD-A73581086-001-01-3:10	BRD-A73581086	ergometrine	NPC	trt_cp	10 uM	24 h	4	152	0.34	0.229875	0	0	1	1	0	Adrenergic receptor agonist|Serotonin receptor agonist	HTR2A	-0.5845	1.1209	-1.5185
EMU001_HBL1_24H:D23	BRD-K35458079	edaravone	HBL1	trt_cp	0.04 uM	24 h	3	171	0.211	0.192075	1	0	1	1	0	Nootropic agent	BCL2	-0.5845	1.1191	-1.5184
AICHI002_KMS34_24H:N01	BRD-K07955840	PF-05212384	KMS34	trt_cp	10 uM	24 h	3	746	0.82	0.790873	1	1	1	1	0	MTOR inhibitor|PI3K inhibitor	MTOR|PIK3CA|PIK3CG	-0.5844	1.1175	-1.5182
CPC013_SKB_24H:BRD-K79090631-001-15-7:10	BRD-K79090631	CGP-60474	SKB	trt_cp	10 uM	24 h	4	595	0.64	0.623992	0	0	1	1	0	CDK inhibitor	CDK1|CDK2	-0.5844	1.1163	-1.5181
LJP009_HME1_24H:P19	BRD-K02113016	olaparib	HME1	trt_cp	10 uM	24 h	3	255	0.1641	0.20685	1	0	1	1	0	PARP inhibitor	PARP1|PARP2|PARP3	-0.5844	1.1167	-1.5181
REP.A013_YAPC_24H:C13	BRD-A37959677	estrone	YAPC	trt_cp	10 uM	24 h	3	95	0.1153	0.10583	1	0	1	1	0	Estrogen receptor agonist|Estrogenic hormone	ESR1|ESR2	-0.5841	1.1065	-1.5175
LJP007_JURKAT_24H:D01	BRD-K80700417	SGI-1776	JURKAT	trt_cp	10 uM	24 h	2	802	0.9158	0.866599	0	0	1	1	0	PIM inhibitor	PIM1|FLT3|PIM2|PIM3	-0.5842	1.1067	-1.5175
CPC013_ASC_24H:BRD-K05104363-001-02-7:10	BRD-K05104363	PD-184352	ASC	trt_cp	10 uM	24 h	4	287	0.4	0.342611	1	1	1	1	0	MEK inhibitor	MAP2K1|MAP2K2|MAP3K1|MAP3K2	-0.5841	1.1063	-1.5174
CPC016_HT29_6H:BRD-K15868788-003-02-8:10	BRD-K15868788	SDZ-205-557	HT29	trt_cp	10 uM	6 h	5	346	0.25	0.297398	0	0	1	1	0	Serotonin receptor antagonist	HTR4|HTR3A|HTR3B	-0.5841	1.1064	-1.5174
CPC018_NPC_24H:BRD-K34154330-003-04-9:10	BRD-K34154330	tracazolate	NPC	trt_cp	10 uM	24 h	3	169	0.23	0.19936	0	0	1	1	0	GABA receptor antagonist	GABRA1	-0.5841	1.1061	-1.5173
REP.B022_HA1E_24H:G19	BRD-K70914287	BIBX-1382	HA1E	trt_cp	2.22 uM	24 h	2	137	0.309	0.208051	1	1	1	1	0	EGFR inhibitor|Tyrosine kinase inhibitor	EGFR|ERBB2	-0.5841	1.1061	-1.5173
LJP007_HELA_24H:N01	BRD-K09991945	BRD-K09991945	HELA	trt_cp	10 uM	24 h	3	130	0.2473	0.181307	1	0	1	1	0	PKC inhibitor	GSK3B	-0.5841	1.1061	-1.5173
CPC016_A549_6H:BRD-K53913732-001-01-8:10	BRD-K53913732	SB-408124	A549	trt_cp	10 uM	6 h	2	91	0.13	0.109982	0	0	1	1	0	Orexin receptor antagonist	HCRTR1|HCRTR2	-0.584	1.1061	-1.5172
REP.A026_HEK293_24H:L22	BRD-K92093830	doxorubicin	HEK293	trt_cp	0.37 uM	24 h	2	428	0.2794	0.349676	0	0	1	1	0	Topoisomerase inhibitor	TOP2A	-0.5839	1.1061	-1.517
CPC016_A549_24H:BRD-A49046702-003-03-4:10	BRD-A49046702	SKF-89976A	A549	trt_cp	10 uM	24 h	3	192	0.23	0.212493	0	0	1	1	0	GABA receptor antagonist	SLC6A1	-0.584	1.1061	-1.517
CPC004_A375_6H:BRD-K12513978-001-16-7:10	BRD-K12513978	fenbufen	A375	trt_cp	10 uM	6 h	3	224	0.15	0.185353	1	0	1	1	0	Cyclooxygenase inhibitor	PTGS1|PTGS2	-0.5839	1.1061	-1.5169
PAC002_U2OS_6H:BRD-K57545991-050-03-3:10	BRD-K57545991	enalapril	U2OS	trt_cp	10 uM	6 h	2	126	0.33	0.206192	0	0	1	1	0	ACE inhibitor	ACE	-0.5839	1.1059	-1.5168
CPC017_A549_24H:BRD-K15791587-003-01-7:10	BRD-K15791587	L-733060	A549	trt_cp	10 uM	24 h	3	180	0.17	0.176885	1	1	1	1	0	Tachykinin antagonist	TACR1	-0.5838	1.1058	-1.5167
CPC014_HCC515_6H:BRD-K09436313-001-01-2:10	BRD-K09436313	prostaglandin	HCC515	trt_cp	10 uM	6 h	3	88	0.11	0.0994874	1	0	1	1	0	Prostanoid receptor antagonist	PTGDR2|PTGDR	-0.5837	1.1044	-1.5164
CPC006_U937_6H:BRD-K81418486:10	BRD-K81418486	vorinostat	U937	trt_cp	10 uM	6 h	2	468	0.71	0.582885	1	1	1	1	0	HDAC inhibitor	HDAC1|HDAC2|HDAC3|HDAC6|HDAC8|HDAC10|HDAC11|HDAC5|HDAC9	-0.5837	1.1034	-1.5163
REP.A005_PC3_24H:F14	BRD-K08976401	azelaic-acid	PC3	trt_cp	3.33 uM	24 h	2	51	0.1413	0.0858394	1	1	1	1	0	Tyrosinase inhibitor	TYR|TXNRD1|TXNRD2|AKR1D1|SRD5A2	-0.5837	1.1035	-1.5163
CPC010_PC3_6H:BRD-K00234327-036-04-4:10	BRD-K00234327	RU-24969	PC3	trt_cp	10 uM	6 h	5	311	0.16	0.225565	1	0	1	1	0	Serotonin receptor agonist	HTR1A|HTR1B|HTR6|HTR1D|HTR2A|HTR2B|HTR2C|HTR5A	-0.5836	1.1034	-1.516
REP.B021_HEK293_24H:G23	BRD-K82967685	mirodenafil	HEK293	trt_cp	0.03 uM	24 h	2	96	0.0607	0.0771899	0	0	1	1	0	Phosphodiesterase inhibitor	PDE5A	-0.5835	1.1034	-1.5159
NMH002_NEU_24H:BRD-A02006392-001-12-3:10	BRD-A02006392	nitrendipine	NEU	trt_cp	10 uM	24 h	3	65	0.09	0.0773408	0	0	1	1	0	Calcium channel blocker	CACNA1C|CACNA1D|CACNA2D1|CACNA1H|CACNA1S|CACNA2D2|CACNB2|CACNG1|KCNN4	-0.5834	1.1034	-1.5156
REP.B019_PC3_24H:I02	BRD-K48195801	tecastemizole	PC3	trt_cp	0.74 uM	24 h	2	199	0.2334	0.217925	1	1	1	1	0	Histamine receptor antagonist	HRH1|KCNH2	-0.5834	1.1034	-1.5155
CPC011_HT29_6H:BRD-K39983086-001-04-6:10	BRD-K39983086	loteprednol	HT29	trt_cp	10 uM	6 h	4	618	0.05	0.17775	0	0	1	1	0	Glucocorticoid receptor agonist|Phospholipase inhibitor	NR3C1	-0.5834	1.1034	-1.5155
MOAR006_PC3_24H:C16	BRD-K48830578	OMDM-2	PC3	trt_cp	10 uM	24 h	3	148	0.27	0.202136	1	1	1	1	0	FAAH inhibitor	GPR119	-0.5834	1.1034	-1.5155
CPC016_ASC_24H:BRD-K37618799-001-01-4:10	BRD-K37618799	MRS-1220	ASC	trt_cp	10 uM	24 h	3	379	0.23	0.298548	0	0	1	1	0	Adenosine receptor antagonist	ADORA3|ADORA2B	-0.5834	1.1034	-1.5155
MOAR006_A375_24H:F01	BRD-K15567136	papaverine	A375	trt_cp	10 uM	24 h	3	382	0.54	0.459261	1	1	1	1	0	Phosphodiesterase inhibitor	PDE10A|PDE4B|PDE5A	-0.5833	1.1034	-1.5154
CPC006_AGS_6H:BRD-K06980535-003-15-0:10	BRD-K06980535	promazine	AGS	trt_cp	10 uM	6 h	2	207	0.39	0.287308	1	1	1	1	0	Dopamine receptor antagonist	CHRM5|DRD2|ADRA1A|ADRA1B|ADRA1D|CHRM1|CHRM2|CHRM3|CHRM4|DRD1|DRD3|DRD4|HRH1|HTR2A|HTR2C	-0.5833	1.1034	-1.5153
REP.A020_HA1E_24H:A12	BRD-K82522873	N-6022	HA1E	trt_cp	0.04 uM	24 h	3	215	0.3625	0.282295	0	0	1	1	0	Alcohol dehydrogenase inhibitor	ADH5	-0.5833	1.1034	-1.5153
LJP005_HS578T_24H:L11	BRD-K05104363	PD-184352	HS578T	trt_cp	0.12 uM	24 h	3	113	0.44	0.225474	1	1	1	1	0	MEK inhibitor	MAP2K1|MAP2K2|MAP3K1|MAP3K2	-0.5833	1.1034	-1.5152
CPC016_A549_24H:BRD-K94689771-001-02-5:10	BRD-K94689771	pinocembrin	A549	trt_cp	10 uM	24 h	3	125	0.25	0.178754	0	0	1	1	0	CYP1B1 inhibitor	AR|SRD5A1|SRD5A2|CYP1B1	-0.5832	1.1034	-1.515
REP.A012_HA1E_24H:C01	BRD-K00494077	trovafloxacin	HA1E	trt_cp	10 uM	24 h	3	464	0.661	0.560003	1	1	1	1	0	Bacterial DNA inhibitor	TOP2A	-0.5832	1.1034	-1.5149
REP.B014_A375_24H:H17	BRD-K59574735	ubenimex	A375	trt_cp	0.03 uM	24 h	2	369	0.6697	0.502671	1	1	1	1	0	Leukotriene inhibitor	LTA4H|ANPEP|RNPEP	-0.5831	1.1034	-1.5147
REP.A027_THP1_24H:E08	BRD-A94756469	digoxin	THP1	trt_cp	3.33 uM	24 h	2	766	0.6627	0.720449	0	0	1	1	0	Na/K-ATPase inhibitor	ATP1A1|ABCB1|RORC|SLCO1B3	-0.583	1.1034	-1.5146
REP.B017_MCF7_24H:E24	BRD-A62879835	rifaximin	MCF7	trt_cp	0.01 uM	24 h	2	71	0.0653	0.068852	1	0	1	1	0	RNA synthesis inhibitor	NR1I2|CYP3A4	-0.583	1.1034	-1.5146
REP.B017_HELA_24H:D01	BRD-K44827188	vismodegib	HELA	trt_cp	2.22 uM	24 h	2	123	0.3114	0.197898	1	1	1	1	0	Hedgehog pathway inhibitor|Smoothened receptor antagonist	SMO|ABCB1|ABCG2|CYP2C19|CYP2C8|DHH|IHH|PTCH1	-0.583	1.1034	-1.5145
CPC011_HT29_6H:BRD-K73991644-001-05-8:10	BRD-K73991644	isoquercetin	HT29	trt_cp	10 uM	6 h	4	504	0.11	0.238091	0	0	1	1	0	Aldose reductase inhibitor	AKR1B1	-0.5829	1.1034	-1.5143
REP.A025_JURKAT_24H:E06	BRD-K99475619	genz-644282	JURKAT	trt_cp	0.04 uM	24 h	2	676	0.7614	0.725455	0	0	1	1	0	Topoisomerase inhibitor	TOP1	-0.5829	1.1034	-1.5142
REP.B010_PC3_24H:K01	BRD-K14529030	meisoindigo	PC3	trt_cp	2.22 uM	24 h	2	107	0.214	0.153013	0	0	1	1	0	STAT inhibitor	STAT3	-0.5828	1.1034	-1.514
REP.A028_MCF7_24H:H11	BRD-A94276798	talinolol	MCF7	trt_cp	0.125 uM	24 h	3	229	0.0326	0.0873689	0	0	1	1	0	Adrenergic receptor antagonist	ADRB1	-0.5828	1.1034	-1.5139
PCLB002_A375_24H:BRD-K68488863:3.33	BRD-K68488863	ENMD-2076	A375	trt_cp	3.33 uM	24 h	2	313	0.54	0.415719	0	0	1	1	0	Aurora kinase inhibitor|FLT3 inhibitor|VEGFR inhibitor	AURKA|FLT3|KDR|PDGFRA|SRC|CSF1R|EPHA1|FGFR1|FGFR2|FGFR3|FLT4|KIT|PTK2	-0.5828	1.1034	-1.5139
PBIOA018_HEPG2_24H:A18	BRD-A10523515	GSK-429286A	HEPG2	trt_cp	0.04 uM	24 h	3	491	0.64	0.566841	1	1	1	1	0	Rho associated kinase inhibitor	ROCK1	-0.5827	1.1034	-1.5138
CPC016_ASC_24H:BRD-K61177364-003-01-1:10	BRD-K61177364	NBI-27914	ASC	trt_cp	10 uM	24 h	3	566	0.5	0.537928	0	0	1	1	0	CRF receptor antagonist	CRHR1	-0.5827	1.1034	-1.5137
CPC006_A549_6H:BRD-A56592690-001-01-9:30	BRD-A56592690	PX-12	A549	trt_cp	30 uM	6 h	4	234	0.47	0.335342	1	1	1	1	0	Thioredoxin inhibitor	TXN|TXNRD1|TXNRD2	-0.5827	1.1034	-1.5136
REP.A016_PC3_24H:B15	BRD-K51263939	sarcosine	PC3	trt_cp	1.11 uM	24 h	2	147	0.1105	0.128876	1	0	1	1	0	GlyT-1 inhibitor	SLC6A9	-0.5826	1.1034	-1.5135
CPD003_PC3_24H:BRD-K92830582-003-07-1:10	BRD-K92830582	BRD-K92830582	PC3	trt_cp	10 uM	24 h	2	58	0.17	0.100408	0	0	1	1	0	Adrenergic receptor antagonist	ADRB2|ADRB3	-0.5826	1.1034	-1.5134
REP.A025_HA1E_24H:M01	BRD-K77685957	dequalinium	HA1E	trt_cp	10 uM	24 h	3	192	0.2281	0.211614	1	1	1	1	0	PKC inhibitor	KCNN1|KCNN3	-0.5825	1.1034	-1.5133
CPC018_A375_6H:BRD-K24023109-003-11-2:10	BRD-K24023109	diltiazem	A375	trt_cp	10 uM	6 h	5	129	0.13	0.130947	0	0	1	1	0	Calcium channel blocker	CACNA1C|CYP3A5|CYP3A7|CACNA1S|CACNA2D1|CACNG1|HTR3A|KCNA5	-0.5825	1.1034	-1.5132
REP.B012_YAPC_24H:G24	BRD-A01787639	naftopidil	YAPC	trt_cp	0.01 uM	24 h	2	375	0.5006	0.438119	0	0	1	1	0	Adrenergic receptor antagonist	ADRA1D|ADRA1A	-0.5824	1.1034	-1.5131
REP.A023_A375_24H:J01	BRD-K70490179	rimcazole	A375	trt_cp	10 uM	24 h	3	434	0.5363	0.487842	1	1	1	1	0	Sigma receptor antagonist	SIGMAR1	-0.5823	1.1033	-1.5128
LJP009_PC3_24H:M16	BRD-K19477839	SGX-523	PC3	trt_cp	0.37 uM	24 h	3	456	0.7313	0.58393	1	1	1	1	0	HGF receptor inhibitor	MET	-0.5823	1.1034	-1.5128
REP.A026_HEK293_24H:O18	BRD-A65051990	acenocoumarol	HEK293	trt_cp	0.04 uM	24 h	2	192	0.0545	0.103438	0	0	1	1	0	Vitamin K antagonist	VKORC1	-0.5823	1.1034	-1.5128
REP.A003_A549_24H:C07	BRD-K31731454	pemirolast	A549	trt_cp	10 uM	24 h	3	119	0.1378	0.129488	0	0	1	1	0	Mediator release inhibitor	HRH1	-0.5822	1.103	-1.5126
REP.B009_A549_24H:E11	BRD-K29530284	amlexanox	A549	trt_cp	0.03 uM	24 h	2	86	0.09	0.0889613	1	1	1	1	0	Histamine receptor antagonist	FGF1|IL3|PDE4A|PDE4B|PDE4C|PDE4D|S100A12|S100A13	-0.5823	1.1032	-1.5126
REP.B013_HUVEC.A_24H:E24	BRD-K39339537	epirizole	HUVEC	trt_cp	0.01 uM	24 h	2	137	0.16	0.14971	0	0	1	1	0	Cyclooxygenase inhibitor	PTGS1|PTGS2	-0.5822	1.103	-1.5125
EMU001_KMS34_24H:J10	BRD-K44844162	taselisib	KMS34	trt_cp	0.125 uM	24 h	2	370	0.7244	0.523505	1	1	1	1	0	PI3K inhibitor	PIK3CA|PIK3CB|PIK3CD|PIK3CG	-0.5822	1.1027	-1.5124
REP.A012_HT29_24H:B23	BRD-A00376169	KBG	HT29	trt_cp	0.125 uM	24 h	2	67	0.2258	0.124374	0	0	1	1	0	Neprilysin inhibitor	MME	-0.5821	1.1008	-1.5123
CPC011_A375_6H:BRD-K22227508-015-03-9:10	BRD-K22227508	targinine	A375	trt_cp	10 uM	6 h	3	622	0.42	0.516833	0	0	1	1	0	Nitric oxide synthase inhibitor	NOS2|NOS3	-0.5821	1.0973	-1.5122
CPC015_ASC_24H:BRD-K97564742-050-18-6:10	BRD-K97564742	mepyramine	ASC	trt_cp	10 uM	24 h	4	290	0.1	0.172199	0	0	1	1	0	Histamine receptor antagonist	HRH1	-0.5819	1.0936	-1.5118
CPC016_HEPG2_6H:BRD-K94441233-001-03-1:10	BRD-K94441233	mevastatin	HEPG2	trt_cp	10 uM	6 h	3	159	0.41	0.258179	1	1	1	1	0	HMGCR inhibitor	HMGCR	-0.5819	1.0935	-1.5117
CPC001_PC3_24H:G12	BRD-K76840893	RS-17053	PC3	trt_cp	10 uM	24 h	5	440	0.5407	0.493214	1	1	1	1	0	Adrenergic receptor antagonist	ADRA1A|ADRA1D	-0.5819	1.0936	-1.5117
CPC016_NPC_24H:BRD-K67831364-003-01-7:10	BRD-K67831364	ZM-323881	NPC	trt_cp	10 uM	24 h	4	131	0.28	0.193662	0	0	1	1	0	VEGFR inhibitor	KDR	-0.5819	1.0936	-1.5117
CPC003_PC3_6H:BRD-K31054881-300-01-3:10	BRD-K31054881	BMY-7378	PC3	trt_cp	10 uM	6 h	4	181	0.12	0.149025	1	0	1	1	0	Adrenergic receptor antagonist|Serotonin receptor antagonist	HTR1A|ADRA1D|ADRA1A|ADRA1B	-0.5819	1.0936	-1.5117
PAC001_U2OS_6H:BRD-K65146499-001-04-8:8.76093	BRD-K65146499	nabumetone	U2OS	trt_cp	8 uM	6 h	2	73	0.22	0.128145	0	0	1	1	0	Cyclooxygenase inhibitor	PTGS2|AKR1C3|CYP2B6|CYP2C19|CYP2E1|PTGS1	-0.5819	1.0935	-1.5116
REP.B017_MCF10A_24H:E20	BRD-A62879835	rifaximin	MCF10A	trt_cp	0.74 uM	24 h	2	67	0.0205	0.0374753	1	0	1	1	0	RNA synthesis inhibitor	NR1I2|CYP3A4	-0.5818	1.0935	-1.5113
REP.A007_A375_24H:H01	BRD-K51333959	siramesine	A375	trt_cp	10 uM	24 h	3	249	0.5062	0.358997	1	1	1	1	0	Sigma receptor antagonist	PGRMC1|SIGMAR1|ADRA1A|ADRA1B|ADRA1D	-0.5818	1.0935	-1.5113
MOAR003_PC3_24H:M20	BRD-A23195370	naloxone	PC3	trt_cp	3.33 uM	24 h	2	114	0.1963	0.151267	1	1	1	1	0	Opioid receptor antagonist	OPRM1|OPRK1|OPRD1|CREB1|ESR1|TLR4	-0.5817	1.0934	-1.5111
LJP007_HELA_24H:G14	BRD-K49328571	dasatinib	HELA	trt_cp	3.33 uM	24 h	3	173	0.504	0.298586	1	1	1	1	0	KIT inhibitor|Bcr-Abl inhibitor|Ephrin inhibitor|PDGFR inhibitor|Src inhibitor|Tyrosine kinase inhibitor	ABL1|FYN|LCK|SRC|KIT|YES1|EPHA2|LYN|PDGFRB|BCR|BTK|DDR1|DDR2|PDGFRA|ABL2|BLK|FGR|FRK|HCK|SRMS|STAT5B	-0.5816	1.0932	-1.511
REP.A014_YAPC_24H:A19	BRD-A56085258	LGX-818	YAPC	trt_cp	10 uM	24 h	3	396	0.5099	0.454382	1	1	1	1	0	RAF inhibitor	BRAF	-0.5816	1.0932	-1.511
REP.A020_A549_24H:P01	BRD-K48812570	macitentan	A549	trt_cp	10 uM	24 h	2	148	0.3003	0.213176	0	0	1	1	0	Endothelin receptor antagonist	EDNRA|EDNRB	-0.5816	1.0932	-1.511
CPC017_SKB_24H:BRD-K11927976-050-01-1:10	BRD-K11927976	ER-27319	SKB	trt_cp	10 uM	24 h	2	358	0.64	0.484019	0	0	1	1	0	Syk inhibitor	SYK	-0.5816	1.0927	-1.5109
CPC017_NPC_24H:BRD-K94176593-001-02-9:10	BRD-K94176593	TWS-119	NPC	trt_cp	10 uM	24 h	3	477	0.61	0.54545	0	0	1	1	0	GSK inhibitor	GSK3B|JUN|MYC	-0.5816	1.0931	-1.5109
REP.A009_HT29_24H:G01	BRD-K30563334	rifabutin	HT29	trt_cp	10 uM	24 h	3	222	0.4727	0.327567	0	0	1	1	0	Bacterial protein synthesis inhibitor	CYP3A4|HSP90AA1|HSP90B1	-0.5816	1.0931	-1.5109
REP.A015_A375_24H:L07	BRD-K59331299	voglibose	A375	trt_cp	10 uM	24 h	3	484	0.4258	0.459046	1	0	1	1	0	Glucosidase inhibitor	GAA|MGAM	-0.5815	1.0866	-1.5106
MOAR018_HAP1.CDK4_24H:E04	BRD-K40870905	CT-7758	HAP1	trt_cp	0.66 uM	24 h	3	46	0.1765	0.0911133	1	1	1	1	0	Integrin inhibitor	ITGA4	-0.5815	1.0867	-1.5106
LIVB001_HUH7_72H:E17	BRD-A09472452	flecainide	HUH7	trt_cp	8 uM	72 h	3	154	0.17	0.163612	0	0	1	1	0	Sodium channel inhibitor	SCN5A|KCNA5|KCNA7|SCN4A	-0.5815	1.0855	-1.5105
CPC017_NPC_24H:BRD-K68341547-003-01-6:10	BRD-K68341547	W-9	NPC	trt_cp	10 uM	24 h	4	329	0.42	0.375883	0	0	1	1	0	Calmodulin inhibitor	CALM2	-0.5815	1.086	-1.5105
CPC015_SKB_24H:BRD-K79759585-048-01-4:10	BRD-K79759585	sildenafil	SKB	trt_cp	10 uM	24 h	2	105	0.07	0.086691	0	0	1	1	0	Phosphodiesterase inhibitor	PDE5A|PDE6G|PDE6H|SLCO1B1|SLCO1B3	-0.5814	1.0852	-1.5104
REP.B007_MCF7_24H:D01	BRD-K43797669	genistein	MCF7	trt_cp	2.22 uM	24 h	2	446	0.6344	0.537873	0	0	1	1	0	Tyrosine kinase inhibitor	CFTR|ESR2|EGFR|ESR1|ESRRA|ESRRB|ESRRG|NCOA1|NCOA2|PPARG|PTK2B|TOP2A|TRPC5	-0.5814	1.0852	-1.5103
REP.A027_MDAMB231_24H:O15	BRD-A97739905	ketoprofen	MDAMB231	trt_cp	1.11 uM	24 h	2	123	0.0934	0.108382	0	0	1	1	0	Cyclooxygenase inhibitor	PTGS2|PTGS1|CXCR1|SLC5A8	-0.5814	1.0852	-1.5102
CPC017_ASC_24H:BRD-K54708045-001-01-3:10	BRD-K54708045	nTZDpa	ASC	trt_cp	10 uM	24 h	4	406	0.17	0.265655	1	0	1	1	0	PPAR receptor agonist	PPARG	-0.5813	1.0852	-1.51
CPC004_A375_6H:BRD-K99621550-003-03-4:10	BRD-K99621550	tubocurarine	A375	trt_cp	10 uM	6 h	3	750	0.52	0.631485	1	0	1	1	0	Acetylcholine receptor antagonist	CHRNA2|HTR3A|ACHE|HTR3B|KCNN1|KCNN2|KCNN3|ZACN	-0.5812	1.0852	-1.5098
AICHI001_KMS34_24H:I13	BRD-K52911425	GDC-0941	KMS34	trt_cp	10 uM	24 h	3	688	0.8	0.750187	1	1	1	1	0	PI3K inhibitor	PIK3CG|PIK3CA|PIK3CB|PIK3CD	-0.5811	1.0852	-1.5096
CPC015_A549_24H:BRD-K51350053-048-06-6:10	BRD-K51350053	toremifene	A549	trt_cp	10 uM	24 h	3	134	0.29	0.199334	0	0	1	1	0	Selective estrogen receptor modulator (SERM)|Estrogen receptor antagonist	ESR1|CYP3A5	-0.5811	1.0852	-1.5096
REP.A009_A375_24H:O07	BRD-A34255068	rolipram	A375	trt_cp	10 uM	24 h	3	152	0.3312	0.226881	0	0	1	1	0	Phosphodiesterase inhibitor	PDE4A|PDE4B|PDE4D|PDE4C	-0.5811	1.0852	-1.5095
CPC011_VCAP_24H:BRD-K94441233-001-09-8:10	BRD-K94441233	mevastatin	VCAP	trt_cp	10 uM	24 h	5	291	0.18	0.231427	0	0	1	1	0	HMGCR inhibitor	HMGCR	-0.5811	1.0852	-1.5095
REP.B022_PC3_24H:I07	BRD-K71480163	GDC-0068	PC3	trt_cp	2.22 uM	24 h	2	185	0.3865	0.27039	1	1	1	1	0	AKT inhibitor	AKT1|AKT2|AKT3|CYP3A5|PRKG1	-0.581	1.0852	-1.5094
REP.A012_MCF7_24H:P03	BRD-A03216249	mepivacaine	MCF7	trt_cp	1.11 uM	24 h	3	563	0.4925	0.532461	1	1	1	1	0	Potassium channel antagonist|Sodium channel inhibitor	SCN9A|SCN10A	-0.581	1.0852	-1.5094
LJP009_SKL_24H:E19	BRD-K44227013	ponatinib	SKL	trt_cp	10 uM	24 h	3	562	0.693	0.631052	1	1	1	1	0	Bcr-Abl inhibitor|FLT3 inhibitor|PDGFR inhibitor	ABL1|BCR|FLT3|RET|FGFR1|FGFR2|FGFR3|FGFR4|KIT|TEK|CYP2C8|CYP3A5|FGF2|FLT1|KDR|LCK|LYN|PDGFRA|SRC	-0.581	1.0852	-1.5093
CPC001_HCC515_24H:BRD-A94624445-236-02-2:10	BRD-A94624445	bucladesine	HCC515	trt_cp	10 uM	24 h	3	478	0.58	0.532425	1	0	1	1	0	Adenosine receptor agonist|CAMP stimulant	PRKACA	-0.581	1.0852	-1.5092
REP.B020_HELA_24H:G01	BRD-A87130939	masoprocol	HELA	trt_cp	2.22 uM	24 h	2	166	0.3316	0.237242	1	1	1	1	0	Lipoxygenase inhibitor	ALOX5|IGF1R	-0.5809	1.0852	-1.5089
CPC018_SKB_24H:BRD-A56012032-001-05-6:10	BRD-A56012032	thiorphan	SKB	trt_cp	10 uM	24 h	2	102	0.2	0.144426	0	0	1	1	0	Membrane integrity inhibitor	MME	-0.5807	1.0852	-1.5087
CPC005_VCAP_6H:BRD-K31987754-001-01-2:10	BRD-K31987754	oleylethanolamide	VCAP	trt_cp	10 uM	6 h	4	154	0.02	0.0561185	0	0	1	1	0	Cannabinoid receptor agonist|Glucose dependent insulinotropic receptor agonist|Potassium channel blocker	GPR119	-0.5808	1.0852	-1.5087
REP.B014_A375_24H:C06	BRD-A56592690	PX-12	A375	trt_cp	0.01 uM	24 h	2	542	0.8081	0.669211	1	1	1	1	0	Thioredoxin inhibitor	TXN|TXNRD1|TXNRD2	-0.5807	1.0852	-1.5086
CPC015_ASC_24H:BRD-A09056319-001-05-5:10	BRD-A09056319	alfuzosin	ASC	trt_cp	10 uM	24 h	4	98	0.07	0.0837515	0	0	1	1	0	Adrenergic receptor antagonist	ADRA1A|ADRA1D|ADRA1B|KCNH2	-0.5807	1.0852	-1.5086
REP.B028_HELA_24H:E03	BRD-A93353767	isoconazole	HELA	trt_cp	0.25 uM	24 h	2	113	0.28	0.179866	1	1	1	1	0	Fungal lanosterol demethylase inhibitor	CYP17A1	-0.5807	1.0852	-1.5086
CPC016_NPC_24H:BRD-K96809896-300-01-5:10	BRD-K96809896	SKF-86002	NPC	trt_cp	10 uM	24 h	4	91	0.17	0.12577	0	0	1	1	0	P38 MAPK inhibitor	ALOX5|MAPK14	-0.5807	1.0852	-1.5084
CPC016_ASC_24H:BRD-K82731415-001-05-4:10	BRD-K82731415	olomoucine	ASC	trt_cp	10 uM	24 h	2	149	0.2	0.174558	0	0	1	1	0	CDK inhibitor	CDK1|CDK2|CDK5|MAPK1	-0.5806	1.0852	-1.5083
LJP007_A375_24H:E02	BRD-K43002773	GDC-0068	A375	trt_cp	3.33 uM	24 h	2	417	0.5469	0.482895	0	0	1	1	0	AKT inhibitor	AKT1|AKT2|AKT3|CYP3A5|PRKG1	-0.5805	1.0852	-1.5081
PAC003_U2OS_6H:BRD-K35629949-001-01-2:10	BRD-K35629949	SR-27897	U2OS	trt_cp	10 uM	6 h	2	42	0.14	0.0775388	1	0	1	1	0	CCK receptor antagonist	CCKAR	-0.5805	1.0852	-1.5081
EMU001_HBL1_24H:P16	BRD-A13689093	ONO-4059	HBL1	trt_cp	0.125 uM	24 h	3	308	0.4057	0.357444	0	0	1	1	0	BTK inhibitor	BTK	-0.5806	1.0852	-1.5081
REP.B028_HELA_24H:B13	BRD-K92467929	oxandrolone	HELA	trt_cp	2.22 uM	24 h	2	60	0.2603	0.12637	1	1	1	1	0	Androgen receptor agonist	AR	-0.5804	1.0852	-1.5078
REP.A018_MDAMB231_24H:K13	BRD-K65678996	nefiracetam	MDAMB231	trt_cp	10 uM	24 h	3	366	0.2316	0.294402	0	0	1	1	0	Acetylcholine receptor agonist|GABA receptor agonist	CHAT|CHRM1	-0.5804	1.0852	-1.5077
MOAR002_PC3_24H:O24	BRD-K19034817	pacritinib	PC3	trt_cp	1.11 uM	24 h	3	360	0.64	0.485369	1	1	1	1	0	FLT3 inhibitor|JAK inhibitor	FLT3|JAK2|CDK2|JAK1|JAK3	-0.5803	1.0852	-1.5075
LJP007_JURKAT_24H:C05	BRD-K53414658	tivozanib	JURKAT	trt_cp	0.12 uM	24 h	2	202	0.4508	0.305139	0	0	1	1	0	VEGFR inhibitor	FLT1|FLT4|KDR|KIT|PDGFRA|PDGFRB	-0.5803	1.0852	-1.5075
LJP007_THP1_24H:F05	BRD-K73319509	PF-04217903	THP1	trt_cp	0.12 uM	24 h	3	116	0.2543	0.173673	1	0	1	1	0	MET inhibitor	MET	-0.5803	1.0852	-1.5075
CPC016_SKB_24H:BRD-K06543683-066-01-3:10	BRD-K06543683	bisindolylmaleimide-ix	SKB	trt_cp	10 uM	24 h	3	596	0.78	0.689447	0	0	1	1	0	PKC inhibitor	SIRT1|LRRK2|SIRT2|AKT1|GSK3B|LCK|MAPK1|MAPK11|MAPK12|MAPK14|MAPK8|PRKCA|ROCK1|RPS6KB1	-0.5803	1.0852	-1.5075
CPD001_PC3_24H:BRD-K74913225-001-07-4:10	BRD-K74913225	brinzolamide	PC3	trt_cp	10 uM	24 h	3	105	0.11	0.108673	1	0	1	1	0	Carbonic anhydrase inhibitor	CA2|CA7|CA1|CYP2B6|CYP2C8|CA12|CA14|CA4|CA5A	-0.5802	1.0852	-1.5073
CPC001_PC3_24H:B09	BRD-K65814004	diphenyleneiodonium	PC3	trt_cp	10 uM	24 h	5	346	0.4239	0.387258	1	1	1	1	0	Nitric oxide synthase inhibitor	ALDH1A2|ALDH2|ALDH5A1|ALDH7A1|NOX3|XDH|NOS2|NOS3	-0.5802	1.0852	-1.5072
REP.A025_YAPC_24H:G01	BRD-K91822704	torcitabine	YAPC	trt_cp	10 uM	24 h	3	275	0.418	0.342835	1	1	1	1	0	DNA inhibitor	DCK|TK2	-0.5801	1.0852	-1.5069
CPD002_PC3_24H:BRD-K33106058-001-10-1:10	BRD-K33106058	cytarabine	PC3	trt_cp	10 uM	24 h	3	301	0.54	0.407672	1	1	1	1	0	Ribonucleotide reductase inhibitor	POLA1|POLB|POLD1|POLE	-0.5801	1.0852	-1.5068
REP.A028_A549_24H:C18	BRD-K92984783	melperone	A549	trt_cp	0.04 uM	24 h	3	115	0.032	0.0613415	0	0	1	1	0	Dopamine receptor antagonist|Serotonin receptor antagonist	DRD2|HTR1A|HTR2A	-0.5799	1.0851	-1.5066
LCP001_MCF10A.WT_24H:N04	BRD-K40738845	BMS-777607	MCF10A	trt_cp	10 uM	24 h	3	145	0.53	0.280319	1	1	1	1	0	AXL kinase inhibitor|FLT3 inhibitor|HGF receptor inhibitor|Macrophage inhibitor|MET inhibitor|Tyrosine kinase inhibitor	MET|AXL|MERTK|MST1R|TYRO3|FLT3	-0.5799	1.0846	-1.5064
REP.A015_A375_24H:E07	BRD-K56844688	epirubicin	A375	trt_cp	10 uM	24 h	3	711	0.7605	0.743558	1	1	1	1	0	Topoisomerase inhibitor	TOP2A|CHD1	-0.5799	1.0848	-1.5064
NMH002_FIBRNPC_24H:BRD-K01638814-050-01-2:10	BRD-K01638814	rilmenidine	NPC	trt_cp	10 uM	24 h	3	199	0.18	0.191379	1	0	1	1	0	Adrenergic receptor agonist|Imidazoline receptor agonist	NISCH|ADRA2A	-0.5799	1.0849	-1.5064
REP.A001_HT29_24H:D14	BRD-A26095496	clobetasol	HT29	trt_cp	3.33 uM	24 h	3	202	0.3235	0.25849	0	0	1	1	0	Glucocorticoid receptor agonist	NR3C1|PLA2G1B	-0.5798	1.084	-1.5063
PBIOA018_A375_24H:H19	BRD-K80700417	SGI-1776	A375	trt_cp	10 uM	24 h	3	414	0.58	0.495501	1	1	1	1	0	PIM inhibitor	PIM1|FLT3|PIM2|PIM3	-0.5798	1.0841	-1.5063
LJP008_MCF7_24H:E22	BRD-K32536677	AGK-2	MCF7	trt_cp	0.37 uM	24 h	2	116	0.5118	0.246382	1	1	1	1	0	SIRT inhibitor	SIRT2	-0.5798	1.0843	-1.5063
REP.A012_HA1E_24H:E01	BRD-K00674894	orteronel	HA1E	trt_cp	10 uM	24 h	2	248	0.3574	0.301047	1	0	1	1	0	Androgen receptor antagonist|Cytochrome P450 inhibitor	CYP17A1	-0.5797	1.0827	-1.5061
CPC014_PHH_24H:BRD-K72703948-001-04-4:10	BRD-K72703948	ZM-447439	PHH	trt_cp	10 uM	24 h	4	250	0.54	0.371533	0	0	1	1	0	Aurora kinase inhibitor	AURKA|AURKB	-0.5798	1.0827	-1.5061
CPC015_ASC_24H:BRD-A92826379-009-03-4:10	BRD-A92826379	lupanine	ASC	trt_cp	10 uM	24 h	4	176	0.23	0.203447	0	0	1	1	0	Sodium channel inhibitor	INS	-0.5797	1.0817	-1.5059
ASG003_U2OS_6H:P18	BRD-A81866333	CGS-21680	U2OS	trt_cp	0.12 uM	6 h	4	82	0.2391	0.141588	1	1	1	1	0	Adenosine receptor agonist	ADORA2A|ADORA1|ADORA2B|ADORA3	-0.5797	1.082	-1.5059
CPC016_SKB_24H:BRD-A74667430-001-15-2:10	BRD-A74667430	etodolac	SKB	trt_cp	10 uM	24 h	3	669	0.11	0.274309	0	0	1	1	0	Cyclooxygenase inhibitor	PTGS2|TRPV1|PTGS1|RXRA	-0.5796	1.0813	-1.5057
CPC006_AGS_6H:BRD-K92241597-001-02-9:80	BRD-K92241597	tosedostat	AGS	trt_cp	80 uM	6 h	2	229	0.5	0.342163	1	1	1	1	0	Peptidase inhibitor	ANPEP|NPEPPS|LAP3	-0.5796	1.0809	-1.5056
CPC006_U937_6H:BRD-K06890060-001-05-9:40	BRD-K06890060	alda-1	U937	trt_cp	40 uM	6 h	2	48	0.26	0.112963	1	0	1	1	0	Aldehyde dehydrogenase activator	ALDH2	-0.5796	1.0809	-1.5056
REP.A018_A549_24H:F01	BRD-K63150726	JTE-907	A549	trt_cp	10 uM	24 h	2	187	0.2562	0.22133	1	1	1	1	0	Cannabinoid receptor antagonist	CNR2	-0.5796	1.081	-1.5056
REP.A016_YAPC_24H:H07	BRD-K53414658	tivozanib	YAPC	trt_cp	10 uM	24 h	2	259	0.4831	0.357684	1	1	1	1	0	VEGFR inhibitor	FLT1|FLT4|KDR|KIT|PDGFRA|PDGFRB	-0.5796	1.0807	-1.5055
CPC017_NPC_24H:BRD-K30240666-051-08-4:10	BRD-K30240666	clemastine	NPC	trt_cp	10 uM	24 h	4	146	0.14	0.144568	0	0	1	1	0	Histamine receptor antagonist	HRH1	-0.5795	1.0804	-1.5054
REP.A017_PC3_24H:J07	BRD-K64931368	aminocaproic-acid	PC3	trt_cp	10 uM	24 h	3	73	0.1106	0.0908593	1	0	1	1	0	Plasminogen activator inhibitor	PLG|PLAT|LPA	-0.5795	1.0804	-1.5054
REP.B012_YAPC_24H:F13	BRD-K01039503	sofalcone	YAPC	trt_cp	2.22 uM	24 h	2	283	0.5306	0.391839	0	0	1	1	0	Mucus protecting agent	HPGD|CBR1	-0.5795	1.0805	-1.5054
REP.A027_MCF10A_24H:E23	BRD-K95763993	trapidil	MCF10A	trt_cp	0.125 uM	24 h	3	102	0.1608	0.129501	0	0	1	1	0	PDGFR inhibitor	PDGFRA	-0.5793	1.0797	-1.505
CPC014_HA1E_6H:BRD-K63068307-001-02-2:10	BRD-K63068307	ZSTK-474	HA1E	trt_cp	10 uM	6 h	3	236	0.46	0.33317	1	1	1	1	0	PI3K inhibitor	PIK3CG|PIK3CA|PIK3CB|PIK3CD	-0.5793	1.0797	-1.505
CPC020_HT29_6H:BRD-A67605442-001-01-7:10	BRD-A67605442	tetrahydrobiopterin	HT29	trt_cp	10 uM	6 h	4	227	0.32	0.272533	1	0	1	1	0	Nitric oxide stimulant|Nitric oxide synthase stimulant|Phenylalanine 4-hydroxylase stimulant	PAH|TH	-0.5794	1.0797	-1.505
ASG003_U2OS_24H:I09	BRD-A93236127	digitoxin	U2OS	trt_cp	0.12 uM	24 h	5	245	0.4634	0.340715	1	1	1	1	0	Na/K-ATPase inhibitor	ATP1A1	-0.5793	1.0796	-1.5049
CRCGN006_HEPG2_24H:BRD-K58685305:20	BRD-K58685305	emodin	HEPG2	trt_cp	20 uM	24 h	3	156	0.26	0.203648	1	1	1	1	0	11-beta-HSD1 inhibitor	CSNK2A1|CSNK2A2|CSNK2B|IL6|PTP4A3	-0.5793	1.0796	-1.5049
REP.B018_PC3_24H:P24	BRD-A67516570	lafutidine	PC3	trt_cp	0.01 uM	24 h	2	171	0.3987	0.264029	1	1	1	1	0	Histamine receptor antagonist	HRH2	-0.5793	1.0796	-1.5048
CPC010_HCC515_6H:BRD-K28143534-003-20-0:10	BRD-K28143534	cyproheptadine	HCC515	trt_cp	10 uM	6 h	3	247	0.38	0.309792	1	1	1	1	0	Histamine receptor antagonist	HRH1|HTR2B|ADRA1A|ADRA1B|ADRA1D|CHRM1|CHRM2|CHRM3|HTR2A|HTR2C|HTR6|HTR7	-0.5793	1.0796	-1.5048
REP.A010_A375_24H:E20	BRD-K13050541	acivicin	A375	trt_cp	4 uM	24 h	3	371	0.6966	0.514055	0	0	1	1	0	Gamma glutamyltransferase Inhibitors	CAD|GGT1|CTPS1	-0.5792	1.0795	-1.5045
CPC004_HA1E_24H:BRD-K60762818-003-15-3:10	BRD-K60762818	desipramine	HA1E	trt_cp	10 uM	24 h	3	164	0.3	0.224292	1	1	1	1	0	Tricyclic antidepressant	SLC6A2|SLC6A4|ADRA1A|ADRA1B|ADRA1D|ADRA2A|ADRA2B|ADRA2C|ADRB1|ADRB2|CHRM1|CHRM2|CHRM3|CHRM4|CHRM5|DRD2|HRH1|HTR1A|HTR2A|HTR2C|SMPD1	-0.5792	1.0795	-1.5045
REP.B020_MCF10A_24H:F23	BRD-K86930074	cediranib	MCF10A	trt_cp	0.03 uM	24 h	2	143	0.3553	0.227927	0	0	1	1	0	VEGFR inhibitor|KIT inhibitor	KDR|FLT1|FLT4|KIT|PDGFRB|CSF1R|FLT3|PDGFRA	-0.5791	1.0795	-1.5044
REP.B026_YAPC_24H:A07	BRD-K87300616	ursodiol	YAPC	trt_cp	2.22 uM	24 h	2	66	0.241	0.12753	1	1	1	1	0	Nuclear factor erythroid derived, like (NRF2) activator	NFE2L2|NR1H4	-0.579	1.0794	-1.5042
CPC016_MCF7_24H:BRD-K88741031-001-01-0:10	BRD-K88741031	BRD-K88741031	MCF7	trt_cp	10 uM	24 h	4	385	0.49	0.439197	1	1	1	1	0	Tyrosine kinase inhibitor|EGFR inhibitor	EGFR	-0.5789	1.0793	-1.5039
REP.B025_MCF7_24H:N09	BRD-A78195072	imexon	MCF7	trt_cp	0.25 uM	24 h	2	181	0.1482	0.165613	0	0	1	1	0	Apoptosis stimulant|Ribonucleoside reductase inhibitor	RRM1|RRM2	-0.5789	1.0793	-1.5039
CPC002_HCC515_6H:BRD-K93201660-001-03-2:10	BRD-K93201660	ML-7	HCC515	trt_cp	10 uM	6 h	2	60	0.2	0.11077	1	1	1	1	0	Muscle relaxant	MYLK	-0.5788	1.0787	-1.5037
CPC006_NCIH2073_6H:BRD-K21672174-001-02-2:160	BRD-K21672174	Ro-28-1675	NCIH2073	trt_cp	150 uM	6 h	2	223	0.51	0.341011	0	0	1	1	0	Glucokinase activator	GCK	-0.5788	1.0789	-1.5037
MOAR005_PC3_24H:F07	BRD-K61845293	DDR1-IN-1	PC3	trt_cp	10 uM	24 h	3	224	0.53	0.348412	1	1	1	1	0	Discoidin domain receptor inhibitor	DDR1|DDR2	-0.5788	1.0777	-1.5036
REP.A015_YAPC_24H:D19	BRD-K56405753	MK-2461	YAPC	trt_cp	10 uM	24 h	3	197	0.399	0.283498	1	1	1	1	0	FGFR inhibitor|VEGFR inhibitor	FGFR1|FGFR2|FGFR3|FLT1|FLT3|MET|FLT4|KDR|MERTK|MST1R|NTRK1|NTRK2|PDGFRB	-0.5788	1.0783	-1.5036
LJP005_MCF7_24H:J07	BRD-K02965346	SU-11274	MCF7	trt_cp	10 uM	24 h	3	271	0.6094	0.410929	1	1	1	1	0	HGF receptor inhibitor|Tyrosine kinase inhibitor	MET	-0.5788	1.0772	-1.5035
CPC017_HT29_6H:BRD-K64044582-001-02-8:10	BRD-K64044582	linoleamide	HT29	trt_cp	10 uM	6 h	5	158	0.18	0.170528	0	0	1	1	0	ACAT inhibitor	SOAT1|SOAT2	-0.5787	1.0741	-1.5032
CPC001_HCC515_24H:BRD-K62221994-001-01-8:10	BRD-K62221994	T-98475	HCC515	trt_cp	10 uM	24 h	3	386	0.45	0.421435	1	1	1	1	0	Gonadotropin receptor antagonist	GNRHR	-0.5786	1.0723	-1.503
REP.A023_YAPC_24H:C13	BRD-K68392338	ZK-93426	YAPC	trt_cp	10 uM	24 h	3	107	0.2048	0.149688	1	1	1	1	0	Benzodiazepine receptor antagonist	GABRA1|GABRA2|GABRA3|GABRA5	-0.5785	1.0719	-1.5028
CPC003_VCAP_6H:BRD-K31054881-300-01-3:10	BRD-K31054881	BMY-7378	VCAP	trt_cp	10 uM	6 h	5	416	0.03	0.112963	1	0	1	1	0	Adrenergic receptor antagonist|Serotonin receptor antagonist	HTR1A|ADRA1D|ADRA1A|ADRA1B	-0.5783	1.0719	-1.5024
REP.A005_MCF7_24H:P19	BRD-K11717138	benzbromarone	MCF7	trt_cp	10 uM	24 h	3	191	0.2803	0.233969	0	0	1	1	0	Chloride channel blocker	SLC22A12|ABCC1	-0.5783	1.0719	-1.5023
CPC014_HT29_6H:BRD-A80775386-001-01-9:10	BRD-A80775386	hyperforin	HT29	trt_cp	10 uM	6 h	5	168	0.13	0.149437	1	0	1	1	0	Cyclooxygenase inhibitor|Dopamine uptake inhibitor|Interleukin inhibitor|Lipoxygenase inhibitor|Serotonin reuptake inhibitor	NR1I2|ALOX5|PTGS1	-0.5783	1.0719	-1.5022
CPC018_NPC_24H:BRD-K06895174-001-01-0:10	BRD-K06895174	cisapride	NPC	trt_cp	10 uM	24 h	3	102	0.15	0.125077	0	0	1	1	0	Serotonin receptor agonist	HTR4|KCNH2|CYP2B6|CYP2C8|CYP3A5|CYP3A7|HTR2A|HTR3A	-0.5783	1.0719	-1.5022
CPC006_NCIH508_6H:BRD-A73680854-001-01-3:10	BRD-A73680854	PT-630	NCIH508	trt_cp	10 uM	6 h	2	32	0.1	0.0572013	1	0	1	1	0	Dipeptidyl peptidase inhibitor	DPP4	-0.5782	1.0719	-1.5021
REP.A010_HELA_24H:P08	BRD-A15297126	fluocinolone-acetonide	HELA	trt_cp	3.33 uM	24 h	3	479	0.6909	0.581709	0	0	1	1	0	Glucocorticoid receptor agonist	NR3C1|SERPINA6	-0.5782	1.0719	-1.502
REP.A002_PC3_24H:P09	BRD-K18324993	budipine	PC3	trt_cp	1.11 uM	24 h	3	195	0.3006	0.244817	1	1	1	1	0	Glutamate receptor antagonist	GRIN1	-0.5781	1.0719	-1.5019
CPC002_HCC515_24H:BRD-K23383398-001-01-6:10	BRD-K23383398	T-0901317	HCC515	trt_cp	10 uM	24 h	3	195	0.4	0.282409	1	1	1	1	0	LXR agonist|ABC transporter expression enhancer|ROR inverse agonist	NR1H3|NR1H2|ABCA1|RORA|RORC|NCOA1|NCOA2|NR1I2|RXRB	-0.5781	1.0719	-1.5018
CPC011_PC3_24H:BRD-K75958195-050-04-8:10	BRD-K75958195	pizotifen	PC3	trt_cp	10 uM	24 h	4	258	0.15	0.198923	1	0	1	1	0	Serotonin receptor antagonist	HTR2A|HTR1A|HTR2C	-0.5781	1.0719	-1.5018
CPC015_NPC_24H:BRD-K10995081-001-15-4:10	BRD-K10995081	perphenazine	NPC	trt_cp	10 uM	24 h	4	455	0.56	0.510423	0	0	1	1	0	Dopamine receptor antagonist	DRD2|CALM1|DRD1|HRH1|HTR2A|HTR2C|HTR6|HTR7	-0.578	1.0719	-1.5016
LJP007_YAPC_24H:P21	BRD-K42728290	NVP-BGJ398	YAPC	trt_cp	1.11 uM	24 h	3	83	0.1652	0.118406	1	0	1	1	0	FGFR inhibitor	FGFR1|FGFR2|FGFR3|FGFR4|KDR	-0.5779	1.0719	-1.5014
REP.A018_MCF10A_24H:A14	BRD-K62196610	AVN-944	MCF10A	trt_cp	3.33 uM	24 h	2	375	0.5441	0.456757	0	0	1	1	0	Inosine monophosphate dehydrogenase inhibitor	IMPDH2|IMPDH1	-0.5779	1.0719	-1.5013
CPC015_MCF7_24H:BRD-A68009927-003-02-9:10	BRD-A68009927	daunorubicin	MCF7	trt_cp	10 uM	24 h	3	695	0.69	0.700241	0	0	1	1	0	RNA synthesis inhibitor|Topoisomerase inhibitor	TOP2A|TOP2B	-0.5779	1.0719	-1.5013
CPC018_ASC_24H:BRD-K46469693-001-01-8:10	BRD-K46469693	SCH-442416	ASC	trt_cp	10 uM	24 h	3	369	0.36	0.368549	1	0	1	1	0	Adenosine receptor antagonist	ADORA1|ADORA2A	-0.5778	1.0719	-1.5011
ABY001_NCIH596_XH:BRD-K70511574:10:24	BRD-K70511574	HMN-214	NCIH596	trt_cp	10 uM	24 h	3	243	0.35	0.294895	1	1	1	1	0	PLK inhibitor	FLT3|KDR|KIT|FLT4|PDGFRB|CSF1R|FLT1|RET|FGFR1|PDGFRA	-0.5778	1.0719	-1.501
REP.B011_MDAMB231_24H:M11	BRD-K07237224	moclobemide	MDAMB231	trt_cp	0.03 uM	24 h	2	105	0.0217	0.0482675	0	0	1	1	0	Monoamine oxidase inhibitor	MAOA|CYP2C19|MAOB	-0.5778	1.0719	-1.5009
PBIOA016_HT29_24H:A07	BRD-K79759585	sildenafil	HT29	trt_cp	10 uM	24 h	3	279	0.38	0.329249	1	1	1	1	0	Phosphodiesterase inhibitor	PDE5A|PDE6G|PDE6H|SLCO1B1|SLCO1B3	-0.5777	1.0719	-1.5008
CPC016_NEU_24H:BRD-K98157055-001-04-2:10	BRD-K98157055	SIB-1757	NEU	trt_cp	10 uM	24 h	3	124	0.07	0.0942086	0	0	1	1	0	Glutamate receptor antagonist	GRM5	-0.5777	1.0719	-1.5007
CPC005_A375_24H:BRD-K09255212-001-04-2:10	BRD-K09255212	clioquinol	A375	trt_cp	10 uM	24 h	3	136	0.29	0.200816	1	1	1	1	0	Chelating agent	OPRK1	-0.5777	1.0719	-1.5007
CPC014_ASC_24H:BRD-K55420858-001-01-0:10	BRD-K55420858	mirin	ASC	trt_cp	10 uM	24 h	3	52	0.13	0.0831388	1	0	1	1	0	MRE11A exonuclease inhibitor	MRE11A	-0.5776	1.0719	-1.5006
REP.B027_YAPC_24H:D08	BRD-K93255255	indoximod	YAPC	trt_cp	0.74 uM	24 h	2	352	0.1765	0.252043	1	0	1	1	0	Indoleamine 2,3-dioxygenase inhibitor	IDO1	-0.5776	1.0719	-1.5004
NMH001_NEU_6H:P11	BRD-K25075681	SR-48692	NEU	trt_cp	10 uM	6 h	3	132	0.3184	0.207302	0	0	1	1	0	Neurotensin receptor antagonist	NTSR1|NTSR2	-0.5776	1.0719	-1.5004
REP.A006_YAPC_24H:E01	BRD-K19741547	vernakalant	YAPC	trt_cp	10 uM	24 h	3	254	0.377	0.312909	1	0	1	1	0	Potassium channel antagonist	KCNA5|KCNJ3|KCNJ5|SCN5A	-0.5775	1.0719	-1.5003
CPC018_NPC_24H:BRD-A29082194-001-02-4:10	BRD-A29082194	gitoxigenin	NPC	trt_cp	10 uM	24 h	2	292	0.63	0.433703	0	0	1	1	0	Na/K-ATPase inhibitor	ATP1A1	-0.5775	1.0719	-1.5001
REP.A020_PC3_24H:G02	BRD-A87130939	masoprocol	PC3	trt_cp	3.33 uM	24 h	3	218	0.2741	0.24718	1	1	1	1	0	Lipoxygenase inhibitor	ALOX5|IGF1R	-0.5774	1.0719	-1.5
LJP005_MDAMB231_24H:K14	BRD-K29395450	PIK-93	MDAMB231	trt_cp	3.33 uM	24 h	2	107	0.3925	0.207225	1	1	1	1	0	PI3K inhibitor	PI4KB|PIK3C3|PIK3CG	-0.5774	1.0719	-1.5
CPC016_SKB_24H:BRD-A97479839-003-08-3:10	BRD-A97479839	piperidolate	SKB	trt_cp	10 uM	24 h	3	104	0.26	0.166278	1	0	1	1	0	Acetylcholine receptor antagonist	CHRM1	-0.5774	1.0719	-1.4999
CPC018_PHH_24H:BRD-K83597974-003-15-6:10	BRD-K83597974	pargyline	PHH	trt_cp	10 uM	24 h	3	209	0.33	0.265559	0	0	1	1	0	Monoamine oxidase inhibitor	MAOB|MAOA	-0.5773	1.0719	-1.4996
CPC013_SKB_24H:BRD-K35687265-236-01-8:10	BRD-K35687265	ON-01910	SKB	trt_cp	10 uM	24 h	4	281	0.12	0.185684	0	0	1	1	0	PLK inhibitor	PLK1|CDK1|FLT1|FYN|PDGFRA|PLK2|SRC	-0.5773	1.0719	-1.4996
REP.A015_HT29_24H:D19	BRD-K56405753	MK-2461	HT29	trt_cp	10 uM	24 h	3	159	0.2817	0.214004	1	1	1	1	0	FGFR inhibitor|VEGFR inhibitor	FGFR1|FGFR2|FGFR3|FLT1|FLT3|MET|FLT4|KDR|MERTK|MST1R|NTRK1|NTRK2|PDGFRB	-0.5772	1.0719	-1.4995
LJP007_MDAMB231_24H:A08	BRD-K64857848	XMD-885	MDAMB231	trt_cp	3.33 uM	24 h	2	184	0.4378	0.286997	1	1	1	1	0	MAP kinase inhibitor	MAPK7|LRRK2	-0.5772	1.0719	-1.4995
CPC011_A375_6H:BRD-K57930253-001-06-6:10	BRD-K57930253	nitrazepam	A375	trt_cp	10 uM	6 h	3	205	0.04	0.0915667	1	0	1	1	0	Benzodiazepine receptor agonist	GABRA1	-0.5772	1.0719	-1.4995
REP.A013_HT29_24H:L24	BRD-K42679050	Y-27152	HT29	trt_cp	0.04 uM	24 h	2	93	0.3096	0.171582	0	0	1	1	0	Potassium channel activator	KCNJ8	-0.5771	1.0719	-1.4993
LJP009_HELA_24H:M01	BRD-K72703948	ZM-447439	HELA	trt_cp	10 uM	24 h	3	283	0.3594	0.322487	1	1	1	1	0	Aurora kinase inhibitor	AURKA|AURKB	-0.5771	1.0719	-1.4992
CPC016_A549_24H:BRD-K18909381-001-01-4:10	BRD-K18909381	CGS-12066B	A549	trt_cp	10 uM	24 h	3	108	0.12	0.115115	0	0	1	1	0	Serotonin receptor agonist	HTR1B	-0.5771	1.0719	-1.4992
CPC006_NCIH2073_6H:BRD-K28360340-001-01-8:10	BRD-K28360340	TW-37	NCIH2073	trt_cp	10 uM	6 h	2	285	0.44	0.358079	0	0	1	1	0	BCL inhibitor	BCL2|BCL2L1|MCL1	-0.5771	1.0719	-1.4992
REP.A017_HA1E_24H:E07	BRD-K62387885	basimglurant	HA1E	trt_cp	10 uM	24 h	3	324	0.4908	0.403232	1	1	1	1	0	Glutamate receptor antagonist	GRM5	-0.5771	1.0719	-1.4991
NMH002_FIBRNPC_24H:BRD-K74765201-001-12-6:10	BRD-K74765201	tomelukast	NPC	trt_cp	10 uM	24 h	3	121	0.16	0.140696	1	0	1	1	0	Leukotriene receptor antagonist	CYSLTR1	-0.577	1.0719	-1.499
REP.A005_YAPC_24H:M01	BRD-A10903566	imiloxan	YAPC	trt_cp	10 uM	24 h	3	171	0.3062	0.231383	0	0	1	1	0	Adrenergic receptor antagonist	ADRA2B|ADRA2A	-0.5769	1.0719	-1.4988
CPC005_HA1E_6H:BRD-K34685430-050-06-7:10	BRD-K34685430	BRD-K34685430	HA1E	trt_cp	10 uM	6 h	2	65	0.1	0.0815243	1	0	1	1	0	Dopamine receptor antagonist|Serotonin receptor antagonist	DRD1|HTR1E|HTR1F|HTR2A|HTR2B|HTR2C	-0.577	1.0719	-1.4988
REP.A007_A375_24H:G07	BRD-K51350053	toremifene	A375	trt_cp	10 uM	24 h	3	171	0.4034	0.265581	1	1	1	1	0	Selective estrogen receptor modulator (SERM)|Estrogen receptor antagonist	ESR1|CYP3A5	-0.5769	1.0719	-1.4987
REP.B010_MDAMB231_24H:B15	BRD-K12219985	glipizide	MDAMB231	trt_cp	0.25 uM	24 h	2	53	0.1565	0.0920928	1	1	1	1	0	Sulfonylurea	ABCC8|KCNJ11|KCNJ10|PPARG	-0.5769	1.0719	-1.4986
REP.A009_PC3_24H:G20	BRD-K26667523	TAK-733	PC3	trt_cp	3.33 uM	24 h	3	306	0.4882	0.390832	0	0	1	1	0	MEK inhibitor	MAP2K1	-0.5769	1.0719	-1.4986
LIVB001_HUH7_72H:P04	BRD-K99447003	enalaprilat	HUH7	trt_cp	10 uM	72 h	3	214	0.08	0.132307	0	0	1	1	0	ACE inhibitor	ACE	-0.5769	1.0719	-1.4986
CPC018_A375_6H:BRD-K36055864-001-09-3:10	BRD-K36055864	cycloheximide	A375	trt_cp	10 uM	6 h	5	518	0.75	0.630269	0	0	1	1	0	Protein synthesis inhibitor	GSK3B|RPL3	-0.5768	1.0719	-1.4985
REP.A028_HT29_24H:P03	BRD-K97399794	quercetin	HT29	trt_cp	1.11 uM	24 h	2	335	0.5783	0.445071	0	0	1	1	0	Polar auxin transport inhibitor	PIK3CG|AKR1B1|CYP2C8|EGFR|GAA|MAOA|PTPN1|SCN5A|SIRT1|XDH|ATP5A1|ATP5B|ATP5C1|HCK|HIBCH|PIM1|STK17B|UGT3A1	-0.5768	1.0719	-1.4985
REP.A022_HT29_24H:M07	BRD-K70557564	zosuquidar	HT29	trt_cp	10 uM	24 h	3	139	0.3668	0.228325	1	1	1	1	0	P-glycoprotein inhibitor	ABCB1|ABCB4	-0.5768	1.0719	-1.4983
REP.A018_MDAMB231_24H:C18	BRD-K62685538	triptorelin	MDAMB231	trt_cp	0.04 uM	24 h	3	140	0.1231	0.132747	0	0	1	1	0	Gonadotropin receptor agonist	GNRHR|GNRH1	-0.5768	1.0719	-1.4983
REP.A006_YAPC_24H:A15	BRD-K18922609	neostigmine	YAPC	trt_cp	1.11 uM	24 h	3	360	0.4732	0.417354	1	0	1	1	0	Acetylcholinesterase inhibitor	ACHE	-0.5768	1.0719	-1.4983
PBIOA019_HCC515_24H:C16	BRD-K97530723	melatonin	HCC515	trt_cp	0.37 uM	24 h	3	97	0.15	0.121973	1	0	1	1	0	Melatonin receptor agonist|Nitric oxide synthase inhibitor	MTNR1A|MTNR1B|TH|ASMT|CALM1|CALR|EPX|ESR1|HTR2B|MPO|NQO2|RORB	-0.5767	1.0719	-1.4982
REP.A028_HELA_24H:D05	BRD-A92826379	lupanine	HELA	trt_cp	0.125 uM	24 h	3	387	0.2655	0.324129	0	0	1	1	0	Sodium channel inhibitor	INS	-0.5767	1.0719	-1.4981
REP.A014_HT29_24H:O15	BRD-K41160163	fenobam	HT29	trt_cp	1.11 uM	24 h	3	268	0.2166	0.243628	1	1	1	1	0	Glutamate receptor antagonist	GRM5	-0.5767	1.0719	-1.498
ASG003_U2OS_24H:L19	BRD-K62858456	lomerizine	U2OS	trt_cp	10 uM	24 h	5	104	0.2644	0.167679	0	0	1	1	0	Calcium channel blocker	ABCB1|CACNA1B|SCN5A	-0.5767	1.0719	-1.498
CRCGN017_MCF10A.TP53.M_24H:BRD-K99792991:33.6559	BRD-K99792991	hexachlorophene	MCF10A	trt_cp	30 uM	24 h	3	718	0.79	0.761564	1	1	1	1	0	Potassium channel activator	ENPP2|GLUD1|SDHD	-0.5766	1.0719	-1.4979
REP.A004_HEK293_24H:P20	BRD-K27204852	balicatib	HEK293	trt_cp	3.33 uM	24 h	2	108	0.3447	0.195103	0	0	1	1	0	Cathepsin inhibitor	CTSK	-0.5765	1.0719	-1.4977
CPC017_HEPG2_6H:BRD-K29668683-300-01-4:10	BRD-K29668683	BD-1063	HEPG2	trt_cp	10 uM	6 h	3	256	0.41	0.327599	1	0	1	1	0	Sigma receptor antagonist	SIGMAR1	-0.5764	1.0719	-1.4975
CPC002_HA1E_6H:BRD-K37080523-001-02-8:10	BRD-K37080523	isoreserpine	HA1E	trt_cp	10 uM	6 h	3	301	0.54	0.407672	1	1	1	1	0	Vesicular monoamine transporter inhibitor	SLC18A2|SLC18A1	-0.5764	1.0719	-1.4974
REP.B014_PC3_24H:F21	BRD-K59197931	naproxen	PC3	trt_cp	0.25 uM	24 h	2	62	0.0761	0.0694574	1	1	1	1	0	Cyclooxygenase inhibitor	PTGS2|PTGS1	-0.5764	1.0719	-1.4974
REP.A015_MCF10A_24H:B19	BRD-K55930204	phenytoin	MCF10A	trt_cp	10 uM	24 h	3	55	0.1083	0.0780416	1	1	1	1	0	Hydantoin antiepileptic	SCN1A|SCN2A|SCN5A|ABCB1|CYP2B6|CYP2C19|CYP3A4|SCN10A|SCN11A|SCN3A|SCN4A|SCN7A|SCN8A|SCN9A	-0.5764	1.0719	-1.4973
LJP009_SHSY5Y_24H:K19	BRD-K45746021	CC-401	SHSY5Y	trt_cp	10 uM	24 h	3	301	0.5657	0.41726	0	0	1	1	0	JNK inhibitor	MAPK8	-0.5763	1.0719	-1.497
REP.B012_HUVEC.A_24H:M09	BRD-A02990301	lofexidine	HUVEC	trt_cp	0.25 uM	24 h	2	116	0.0554	0.0810615	0	0	1	1	0	Adrenergic receptor agonist	ADRA2A	-0.5762	1.0719	-1.4969
CPC004_A375_6H:BRD-K94512704-001-02-1:10	BRD-K94512704	spiramide	A375	trt_cp	10 uM	6 h	3	91	0.31	0.169837	1	0	1	1	0	Dopamine receptor antagonist|Serotonin receptor antagonist	HTR2A|HTR1A	-0.5761	1.0719	-1.4967
GMB001_HL60_2H:BRD-A79768653:10	BRD-A79768653	sirolimus	HL60	trt_cp	10 uM	2 h	6	521	0.57	0.551045	0	0	1	1	0	MTOR inhibitor	MTOR|FKBP1A|CCR5|FGF2	-0.5762	1.0719	-1.4967
CPC002_HCC515_24H:BRD-K18678457-003-01-0:10	BRD-K18678457	ZD-7288	HCC515	trt_cp	10 uM	24 h	3	66	0.17	0.107109	1	0	1	1	0	HCN channel antagonist	HCN1|HCN2|HCN3|HCN4	-0.5762	1.0719	-1.4967
CPC013_A375_6H:BRD-U68942961-000-01-2:10	BRD-U68942961	JW-7-24-1	A375	trt_cp	10 uM	6 h	3	496	0.63	0.565251	1	1	1	1	0	LCK Inhibitor	LCK	-0.5761	1.0719	-1.4966
CPC008_HEPG2_6H:BRD-A12633378-001-05-4:10	BRD-A12633378	ML-213	HEPG2	trt_cp	10 uM	6 h	3	94	0.09	0.093007	1	0	1	1	0	Potassium channel activator	KCNQ4|KCNQ2	-0.5761	1.0719	-1.4965
REP.A024_YAPC_24H:E06	BRD-K74763371	bosentan	YAPC	trt_cp	0.04 uM	24 h	3	221	0.2008	0.213014	1	0	1	1	0	Endothelin receptor antagonist	EDNRB|EDNRA|ABCB1|CYP2C19|CYP3A4	-0.576	1.0719	-1.4963
CPC002_VCAP_24H:BRD-A23072235-050-09-4:10	BRD-A23072235	pheniramine	VCAP	trt_cp	10 uM	24 h	3	554	0.74	0.647443	1	1	1	1	0	Histamine receptor antagonist	HRH1	-0.576	1.0719	-1.4963
CPC006_HCT116_6H:BRD-K92980438-001-01-7:160	BRD-K92980438	BRD-K92980438	HCT116	trt_cp	150 uM	6 h	2	73	0.34	0.159306	0	0	1	1	0	Hexokinase inhibitor	HK2	-0.5759	1.0719	-1.496
REP.B024_A549_24H:L02	BRD-K45275534	betrixaban	A549	trt_cp	0.74 uM	24 h	2	104	0.2528	0.163959	1	0	1	1	0	Coagulation factor inhibitor	F10|KCNH2	-0.5758	1.0719	-1.4959
CPC018_PHH_24H:BRD-A52530684-001-01-1:10	BRD-A52530684	doxorubicin	PHH	trt_cp	10 uM	24 h	2	266	0.63	0.413944	0	0	1	1	0	Topoisomerase inhibitor	TOP2A	-0.5758	1.0719	-1.4958
AICHI002_KMS34_24H:I19	BRD-K53734668	PRT-062607	KMS34	trt_cp	10 uM	24 h	2	678	0.67	0.681527	0	0	1	1	0	Syk inhibitor	SYK|FGR|MAP3K9	-0.5757	1.0719	-1.4957
CPC006_H1299_6H:BRD-K09778810-001-03-1:10	BRD-K09778810	FGIN-1-27	H1299	trt_cp	10 uM	6 h	2	70	0.17	0.110307	0	0	1	1	0	Inositol monophosphatase inhibitor	TSPO	-0.5757	1.0719	-1.4956
CPC018_ASC_24H:BRD-K12932420-001-01-5:10	BRD-K12932420	YM-976	ASC	trt_cp	10 uM	24 h	3	81	0.11	0.0954486	1	0	1	1	0	Phosphodiesterase inhibitor	PDE4A|PDE4B|PDE4C|PDE4D|TNF	-0.5756	1.0719	-1.4954
MOAR002_PC3_24H:A19	BRD-K17894950	indirubin	PC3	trt_cp	10 uM	24 h	3	150	0.25	0.195815	1	1	1	1	0	CDK inhibitor|GSK inhibitor	CDK1|CDK5|CDK2|CDK4|GSK3B|GSK3A	-0.5756	1.0719	-1.4954
CPC013_HCC515_6H:BRD-K82164249-001-01-9:10	BRD-K82164249	andarine	HCC515	trt_cp	10 uM	6 h	3	279	0.37	0.324888	0	0	1	1	0	Androgen receptor antagonist	AR	-0.5756	1.0719	-1.4953
LJP008_ASC.C_24H:N02	BRD-K83452553	daminozide	ASC	trt_cp	3.33 uM	24 h	2	64	0.2222	0.120585	1	1	1	1	0	KDM2A inhibitor	KDM2A|KDM7A|PHF8	-0.5755	1.0719	-1.4951
REP.A014_MCF10A_24H:M09	BRD-K38197229	bumetanide	MCF10A	trt_cp	1.11 uM	24 h	3	160	0.2354	0.196243	0	0	1	1	0	Solute carrier family member inhibitor	SLC12A1|SLC12A2|CFTR|GPR35|SLC12A4|SLC12A5	-0.5754	1.0719	-1.4948
CPC010_HEPG2_6H:BRD-A72441487-001-04-0:10	BRD-A72441487	stiripentol	HEPG2	trt_cp	10 uM	6 h	3	78	0.2	0.126297	1	0	1	1	0	GABA receptor antagonist	ABAT|SCN1A|SCN3A|GABRA3	-0.5754	1.0719	-1.4948
REP.A014_HEK293_24H:E07	BRD-K58486055	reparixin	HEK293	trt_cp	10 uM	24 h	3	489	0.3601	0.424323	0	0	1	1	0	CC chemokine receptor antagonist	CXCR1|CXCR2	-0.5754	1.0719	-1.4947
REP.B020_HA1E_24H:N08	BRD-K47936004	piribedil	HA1E	trt_cp	0.74 uM	24 h	2	150	0.2341	0.189486	1	0	1	1	0	Dopamine receptor agonist	DRD2|DRD3|ADRA2A|ADRA1A|ADRA2C|DRD4|HTR1A|HTR2B	-0.5754	1.0719	-1.4947
REP.A022_HELA_24H:C01	BRD-K68103045	CGS-20625	HELA	trt_cp	10 uM	24 h	3	417	0.5285	0.474702	1	1	1	1	0	Benzodiazepine receptor agonist	GABRA1|GABRA2|GABRA3|GABRA5|GABRA4|GABRA6	-0.5754	1.0719	-1.4947
CPC011_HT29_6H:BRD-K48195008-001-13-2:10	BRD-K48195008	BRD-K48195008	HT29	trt_cp	10 uM	6 h	4	695	0.04	0.168598	0	0	1	1	0	Estrogen receptor agonist|Estrogenic hormone	ESR1|CYP2C8|ESR2|NR1I2	-0.5754	1.0719	-1.4946
LJP007_HUVEC_24H:I01	BRD-K42828737	sunitinib	HUVEC	trt_cp	10 uM	24 h	3	391	0.6146	0.495696	1	1	1	1	0	FLT3 inhibitor|KIT inhibitor|PDGFR inhibitor|RET inhibitor|VEGFR inhibitor	PDGFRB|FLT1|FLT3|FLT4|KDR|KIT|PDGFRA|RET	-0.5753	1.0719	-1.4945
CPC016_ASC_24H:BRD-K88358234-003-01-4:10	BRD-K88358234	xaliproden	ASC	trt_cp	10 uM	24 h	2	199	0.24	0.220985	0	0	1	1	0	Serotonin receptor agonist	HTR1A	-0.5753	1.0719	-1.4945
REP.B017_A549_24H:E21	BRD-A62879835	rifaximin	A549	trt_cp	0.25 uM	24 h	2	93	0.1719	0.127853	1	0	1	1	0	RNA synthesis inhibitor	NR1I2|CYP3A4	-0.5753	1.0719	-1.4944
REP.A025_YAPC_24H:D03	BRD-A90799790	isradipine	YAPC	trt_cp	1.11 uM	24 h	3	83	0.2859	0.155767	1	1	1	1	0	Calcium channel blocker	CACNA1C|CACNA1D|CACNA1F|CACNA1S|CACNA2D1|CACNA1H|CACNA2D2|CACNB2	-0.5752	1.0719	-1.4943
CPC006_U937_6H:BRD-K12762134-001-01-3:11.1	BRD-K12762134	XAV-939	U937	trt_cp	12 uM	6 h	2	213	0.4	0.295155	1	1	1	1	0	Tankyrase inhibitor	TNKS|TNKS2	-0.5752	1.0719	-1.4942
EMU001_TMD8_3H:D07	BRD-K81528515	nilotinib	TMD8	trt_cp	10 uM	3 h	3	124	0.3217	0.201961	0	0	1	1	0	Bcr-Abl inhibitor|Abl inhibitor	ABL1|KIT|BCR|CYP2B6|CYP2C8|DDR1|DDR2|PDGFRA	-0.5752	1.0719	-1.4941
CPC006_NOMO1_6H:BRD-K61662457-001-02-2:20	BRD-K61662457	CAY-10594	NOMO1	trt_cp	20 uM	6 h	2	255	0.16	0.204249	1	0	1	1	0	Phospholipase inhibitor	PLD2	-0.5751	1.0719	-1.4939
CPC020_A549_6H:BRD-K35458079-001-19-0:10	BRD-K35458079	edaravone	A549	trt_cp	10 uM	6 h	2	89	0.17	0.12438	0	0	1	1	0	Nootropic agent	BCL2	-0.5751	1.0719	-1.4939
REP.B018_MCF7_24H:D21	BRD-K62762455	RU-58841	MCF7	trt_cp	0.25 uM	24 h	2	116	0.4279	0.225284	1	1	1	1	0	Androgen receptor antagonist	AR	-0.575	1.0719	-1.4938
CPC002_HCC515_24H:BRD-K51918615-303-01-1:10	BRD-K51918615	iodophenpropit	HCC515	trt_cp	10 uM	24 h	3	325	0.57	0.435221	1	1	1	1	0	Histamine receptor antagonist	HRH3|HRH4|GRIN2B	-0.575	1.0719	-1.4938
CPC005_A549_6H:BRD-A65145453-001-02-0:10	BRD-A65145453	ATPA	A549	trt_cp	10 uM	6 h	3	146	0.09	0.115912	1	0	1	1	0	Glutamate receptor agonist	GRIK1|GRIA2	-0.575	1.0719	-1.4937
CPC001_PC3_6H:BRD-K89210380-001-03-8:10	BRD-K89210380	biotin	PC3	trt_cp	10 uM	6 h	4	127	0.1	0.113955	1	0	1	1	0	Vitamin B	ACACA|ACACB|HLCS|MCCC1|MCCC2|PC|PCCA|PCCB|SLC5A6	-0.5749	1.0719	-1.4935
CPC009_A375_6H:BRD-K84141129-001-01-0:10	BRD-K84141129	VU-0400193-3	A375	trt_cp	10 uM	6 h	4	133	0.19	0.160743	0	0	1	1	0	Glutamate receptor antagonist	GRM4	-0.5748	1.071	-1.4932
CPC017_SKB_24H:BRD-K11373525-003-01-3:10	BRD-K11373525	ZD-7155	SKB	trt_cp	10 uM	24 h	2	58	0.13	0.0878044	1	0	1	1	0	Angiotensin receptor antagonist	AGTR1	-0.5748	1.0711	-1.4932
REP.B021_YAPC_24H:H17	BRD-K82941592	rosuvastatin	YAPC	trt_cp	0.03 uM	24 h	2	69	0.2051	0.120292	1	1	1	1	0	HMGCR inhibitor	HMGCR	-0.5748	1.0712	-1.4932
PBIOA017_HA1E_24H:M01	BRD-K67578145	GDC-0879	HA1E	trt_cp	10 uM	24 h	3	158	0.28	0.212686	1	1	1	1	0	RAF inhibitor	BRAF	-0.5748	1.0714	-1.4932
REP.A026_A375_24H:P24	BRD-A15931911	bucladesine	A375	trt_cp	0.04 uM	24 h	3	237	0.3159	0.276681	0	0	1	1	0	Adenosine receptor agonist|CAMP stimulant	PRKACA	-0.5748	1.0706	-1.4931
CPC006_NCIH2073_6H:BRD-K61250553-003-13-2:10	BRD-K61250553	loperamide	NCIH2073	trt_cp	10 uM	6 h	2	129	0.28	0.192178	0	0	1	1	0	Opioid receptor agonist	OPRM1|OPRD1|CYP2B6|CYP2C8|NPR2|CACNA1A|CALM1|OPRK1|POMC	-0.5748	1.071	-1.4931
REP.A023_PC3_24H:J01	BRD-K70490179	rimcazole	PC3	trt_cp	10 uM	24 h	3	354	0.4905	0.421358	1	1	1	1	0	Sigma receptor antagonist	SIGMAR1	-0.5747	1.07	-1.493
REP.B010_HELA_24H:F19	BRD-A13084692	troglitazone	HELA	trt_cp	2.22 uM	24 h	2	70	0.1793	0.113284	1	1	1	1	0	PPAR receptor agonist|Insulin sensitizer	PPARG|AKR1B1|CCL2|CYP3A4|INS|ACSL4|ESRRA|ESRRG|SERPINE1|SLC29A1|TRPM3	-0.5747	1.0701	-1.493
CPC016_HEPG2_6H:BRD-K70487031-001-01-0:10	BRD-K70487031	flupentixol	HEPG2	trt_cp	10 uM	6 h	3	179	0.26	0.218144	1	0	1	1	0	Dopamine receptor antagonist	DRD2|DRD1|ADRA1A|CHRM1|DRD3|DRD5|HTR2A	-0.5747	1.0693	-1.4929
PCL001_HEPG2_24H:BRD-K09132007:20	BRD-K09132007	D-4476	HEPG2	trt_cp	20 uM	24 h	3	203	0.43	0.298753	1	1	1	1	0	TGF-beta receptor inhibitor	CSNK1A1|CSNK1D|TGFB1	-0.5747	1.0696	-1.4929
REP.B024_A375_24H:B22	BRD-K73794685	azithromycin	A375	trt_cp	0.08 uM	24 h	2	207	0.269	0.238612	1	1	1	1	0	Bacterial 50S ribosomal subunit inhibitor	MLNR	-0.5746	1.0681	-1.4928
REP.B026_JURKAT_24H:L02	BRD-A91699651	chloroquine	JURKAT	trt_cp	0.74 uM	24 h	2	69	0.0496	0.0591556	0	0	1	1	0	Antimalarial	CYP2C8|GSTA2|MRGPRX1|TLR9|TNF	-0.5746	1.0677	-1.4926
CPC005_HA1E_6H:BRD-K18518344-001-03-5:10	BRD-K18518344	digitoxigenin	HA1E	trt_cp	10 uM	6 h	2	396	0.6	0.492894	1	1	1	1	0	Na/K-ATPase inhibitor	ATP1A1	-0.5745	1.0677	-1.4924
REP.A023_HT29_24H:E01	BRD-K68867920	quetiapine	HT29	trt_cp	10 uM	24 h	3	225	0.4007	0.303621	1	1	1	1	0	Dopamine receptor antagonist|Serotonin receptor antagonist	DRD2|HTR1A|HTR2A|DRD1|HRH1|HTR1D|HTR1E|ADRA1A|ADRA1B|ADRA1D|ADRA2A|ADRA2B|ADRA2C|CHRM1|CHRM2|CHRM3|CHRM4|CHRM5|DRD3|DRD4|DRD5|HTR1B|HTR1F|HTR2C|HTR3A|HTR6|HTR7|SLC6A2	-0.5745	1.0677	-1.4924
CPC016_HEPG2_6H:BRD-K92073408-001-03-3:10	BRD-K92073408	BRD-K92073408	HEPG2	trt_cp	10 uM	6 h	3	146	0.18	0.163924	0	0	1	1	0	Progestogen hormone|Progesterone receptor agonist	PGR	-0.5744	1.0677	-1.4923
CPC014_PHH_24H:BRD-K77390737-001-03-2:10	BRD-K77390737	xanthohumol	PHH	trt_cp	10 uM	24 h	4	140	0.31	0.210657	0	0	1	1	0	ATPase inhibitor	VCP	-0.5743	1.0677	-1.492
CPC005_HT29_24H:BRD-K77793136-003-02-2:10	BRD-K77793136	hydroxyfasudil	HT29	trt_cp	10 uM	24 h	3	113	0.04	0.0679829	1	0	1	1	0	Rho associated kinase inhibitor	ROCK1|ROCK2|PKIA|PRKACA	-0.5743	1.0677	-1.4918
CPC017_A549_6H:BRD-K59469039-001-03-1:10	BRD-K59469039	AG-879	A549	trt_cp	10 uM	6 h	3	266	0.45	0.349847	1	1	1	1	0	Tyrosine kinase inhibitor|Angiogenesis inhibitor|VEGFR inhibitor	KDR|ERBB2|NTRK1	-0.5742	1.0677	-1.4917
CPC013_A375_6H:BRD-K47832606-001-13-7:10	BRD-K47832606	floxuridine	A375	trt_cp	10 uM	6 h	3	365	0.02	0.0863957	1	0	1	1	0	DNA synthesis inhibitor	TYMS	-0.5742	1.0677	-1.4916
EMU001_OCILY10_24H:J19	BRD-K99964838	bosutinib	OCILY10	trt_cp	10 uM	24 h	3	774	0.832	0.811452	0	0	1	1	0	Src inhibitor|Abl inhibitor|Bcr-Abl inhibitor	ABL1|SRC|BCR|LYN|CAMK2G|HCK|CAMK1D|CDK2|FRK|FYN|MAP2K1|MAP2K2|MAP3K2|MAP4K5|STK10|STK24|STK4|TNK2|TXK	-0.5742	1.0677	-1.4916
REP.B023_HELA_24H:G01	BRD-K35189033	levonorgestrel	HELA	trt_cp	2.22 uM	24 h	2	341	0.5345	0.4317	1	1	1	1	0	Estrogen receptor agonist|Glucocorticoid receptor antagonist|Progesterone receptor agonist|Progesterone receptor antagonist	PGR|CYP2E1|AR|ESR1|SRD5A1	-0.574	1.0677	-1.4912
CPC014_MCF7_24H:BRD-K31484631-001-05-0:10	BRD-K31484631	rifabutin	MCF7	trt_cp	10 uM	24 h	3	290	0.34	0.317518	0	0	1	1	0	Protein synthesis inhibitor	CYP3A4|HSP90AA1|HSP90B1	-0.574	1.0677	-1.4911
ASG003_MCF7_24H:H01	BRD-A91452556	estradiol-cypionate	MCF7	trt_cp	10 uM	24 h	4	110	0.3569	0.200355	1	1	1	1	0	Estrogen receptor agonist	ESR1	-0.5739	1.0677	-1.491
AICHI002_OCILY19_24H:C07	BRD-K54997624	alpelisib	OCILY19	trt_cp	10 uM	24 h	3	487	0.71	0.594599	0	0	1	1	0	PI3K inhibitor	PIK3CA|PIK3CB|PIK3CD|PIK3CG	-0.574	1.0677	-1.491
CPC009_A375_6H:BRD-K32318651-001-15-3:10	BRD-K32318651	acyclovir	A375	trt_cp	10 uM	6 h	4	480	0.48	0.485369	0	0	1	1	0	DNA inhibitor	PNP	-0.5739	1.0677	-1.4909
REP.B027_JURKAT_24H:E20	BRD-K95763993	trapidil	JURKAT	trt_cp	0.74 uM	24 h	2	67	0.1122	0.0876727	1	0	1	1	0	PDGFR inhibitor	PDGFRA	-0.5739	1.0677	-1.4908
REP.A013_MCF10A_24H:F02	BRD-K38473998	cilomilast	MCF10A	trt_cp	3.33 uM	24 h	3	168	0.2817	0.219978	1	1	1	1	0	Phosphodiesterase inhibitor	PDE4A|PDE4B|PDE4D|IL12A|IL12B|IL1B|PDE4C|TNF	-0.5738	1.0677	-1.4907
CPC020_HCC515_6H:BRD-K01507359-001-10-4:10	BRD-K01507359	rifampicin	HCC515	trt_cp	10 uM	6 h	2	278	0.23	0.255692	1	0	1	1	0	RNA polymerase inhibitor	NR1I2|ABCB1|CYP2B6|CYP2C19|CYP2C8|CYP3A4|CYP3A5|SLCO1A2|SLCO1B1|SLCO1B3	-0.5737	1.0672	-1.4904
CPC017_HEPG2_6H:BRD-A81177136-001-03-6:10	BRD-A81177136	KN-62	HEPG2	trt_cp	10 uM	6 h	3	239	0.31	0.275239	1	1	1	1	0	Calcium channel blocker|Purinergic receptor antagonist	P2RX7|CAMK2A|AKT1|CHEK1|LCK|MAPK1|MAPK11|MAPK12|MAPK14|MAPK8|PRKCA|ROCK1|RPS6KB1|SGK1	-0.5737	1.0673	-1.4904
CPC015_SKB_24H:BRD-A79981887-003-09-9:10	BRD-A79981887	midodrine	SKB	trt_cp	10 uM	24 h	2	56	0.11	0.0793635	0	0	1	1	0	Adrenergic receptor agonist	ADRA1A|ADRA1B|ADRA1D	-0.5737	1.067	-1.4903
LJP005_BT20_3H:N01	BRD-K54997624	alpelisib	BT20	trt_cp	10 uM	3 h	3	219	0.4049	0.301111	1	1	1	1	0	PI3K inhibitor	PIK3CA|PIK3CB|PIK3CD|PIK3CG	-0.5736	1.0661	-1.4901
CPC004_HA1E_6H:BRD-A55416093-001-03-1:10	BRD-A55416093	colforsin	HA1E	trt_cp	10 uM	6 h	3	243	0.51	0.355974	1	1	1	1	0	Adenylyl cyclase activator	ADCY2|ADCY5	-0.5736	1.0657	-1.49
CPC016_ASC_24H:BRD-K09397065-003-03-8:10	BRD-K09397065	SR-57227A	ASC	trt_cp	10 uM	24 h	2	453	0.35	0.402637	0	0	1	1	0	Serotonin receptor agonist	HTR3A	-0.5735	1.065	-1.4899
PBIOA016_A375_24H:A17	BRD-K33106058	cytarabine	A375	trt_cp	0.125 uM	24 h	2	539	0.7436	0.640169	1	1	1	1	0	Ribonucleotide reductase inhibitor	POLA1|POLB|POLD1|POLE	-0.5735	1.0652	-1.4899
CPC014_SKB_24H:BRD-K86930074-001-01-9:10	BRD-K86930074	cediranib	SKB	trt_cp	10 uM	24 h	4	270	0.53	0.382517	0	0	1	1	0	VEGFR inhibitor|KIT inhibitor	KDR|FLT1|FLT4|KIT|PDGFRB|CSF1R|FLT3|PDGFRA	-0.5735	1.0643	-1.4898
REP.B005_PC3_24H:K23	BRD-K10852020	tolcapone	PC3	trt_cp	0.03 uM	24 h	3	140	0.2177	0.176532	1	1	1	1	0	Catechol O methyltransferase inhibitor	COMT|TTR	-0.5735	1.0648	-1.4898
REP.A026_HA1E_24H:A19	BRD-K87782578	AVL-292	HA1E	trt_cp	10 uM	24 h	2	535	0.5801	0.563325	0	0	1	1	0	BTK inhibitor	BTK|EGFR|ITK|JAK3|YES1	-0.5735	1.0641	-1.4897
REP.B016_MCF10A_24H:K15	BRD-K55013654	lorcaserin	MCF10A	trt_cp	0.25 uM	24 h	2	61	0.1905	0.109004	1	0	1	1	0	Serotonin receptor agonist	HTR2C|HTR2A|HTR2B	-0.5735	1.0642	-1.4897
CPC006_NCIH2073_6H:BRD-K91623615-001-01-9:10	BRD-K91623615	ABT-751	NCIH2073	trt_cp	10 uM	6 h	2	100	0.18	0.135665	0	0	1	1	0	Tubulin inhibitor	TUBB	-0.5734	1.0633	-1.4896
CPC015_ASC_24H:BRD-A42167015-003-03-7:10	BRD-A42167015	carteolol	ASC	trt_cp	10 uM	24 h	4	332	0.41	0.373071	0	0	1	1	0	Adrenergic receptor antagonist	ADRB1|ADRB2	-0.5734	1.0634	-1.4896
PAC005_U2OS_6H:BRD-A85280935-003-01-7:10	BRD-A85280935	quinpirole	U2OS	trt_cp	10 uM	6 h	2	104	0.47	0.223561	1	1	1	1	0	Dopamine receptor agonist	DRD2|DRD3|DRD4	-0.5734	1.0635	-1.4896
CPC018_HT29_6H:BRD-K83597974-003-15-6:10	BRD-K83597974	pargyline	HT29	trt_cp	10 uM	6 h	4	264	0.26	0.264923	1	0	1	1	0	Monoamine oxidase inhibitor	MAOB|MAOA	-0.5734	1.0628	-1.4895
REP.A004_PC3_24H:H19	BRD-K22822991	odanacatib	PC3	trt_cp	10 uM	24 h	3	104	0.2478	0.16233	1	0	1	1	0	Cathepsin inhibitor	CTSK	-0.5734	1.063	-1.4895
CPC015_ASC_24H:BRD-K92093830-003-05-0:10	BRD-K92093830	doxorubicin	ASC	trt_cp	10 uM	24 h	4	545	0.67	0.611035	0	0	1	1	0	Topoisomerase inhibitor	TOP2A	-0.5733	1.0621	-1.4893
REP.B020_HEK293_24H:A23	BRD-K83405785	pimavanserin	HEK293	trt_cp	0.03 uM	24 h	2	151	0.2769	0.206767	0	0	1	1	0	Serotonin receptor antagonist	HTR2A|DRD2	-0.5733	1.0622	-1.4893
REP.B017_HEK293_24H:F17	BRD-K62858456	lomerizine	HEK293	trt_cp	0.03 uM	24 h	2	58	0.2886	0.130826	1	1	1	1	0	Calcium channel blocker	ABCB1|CACNA1B|SCN5A	-0.5732	1.0621	-1.489
REP.B024_HEK293_24H:L18	BRD-K78055238	LY-2090314	HEK293	trt_cp	0.01 uM	24 h	2	131	0.2754	0.192065	0	0	1	1	0	GSK inhibitor	GSK3B	-0.5731	1.062	-1.4889
PBIOA017_HEPG2_24H:O13	BRD-K64610608	EMF-BCA1-57	HEPG2	trt_cp	10 uM	24 h	3	133	0.12	0.127746	1	0	1	1	0	Caspase inhibitor	CASP3	-0.5731	1.062	-1.4889
CPC015_ASC_24H:BRD-A41519720-001-03-0:10	BRD-A41519720	ezetimibe	ASC	trt_cp	10 uM	24 h	4	248	0.29	0.271179	0	0	1	1	0	Cholesterol inhibitor|Niemann-Pick C1-like 1 protein antagonist	NPC1L1|ANPEP|SOAT1	-0.5731	1.062	-1.4889
PBIOA016_A375_24H:B07	BRD-K89732114	trifluoperazine	A375	trt_cp	10 uM	24 h	2	309	0.5137	0.40287	1	1	1	1	0	Dopamine receptor antagonist	DRD2|ABCG2|CAMK2A|SCN4A|SCN9A|ADRA1A|CALM1|CALY|DRD4|HRH1|HTR2A|HTR2C|S100A4|TNNC1	-0.573	1.062	-1.4887
REP.B006_HELA_24H:H04	BRD-K20738689	dazmegrel	HELA	trt_cp	0.08 uM	24 h	2	45	0.0167	0.0277201	0	0	1	1	0	Thromboxane synthase inhibitor	TBXAS1	-0.5731	1.062	-1.4887
REP.B024_MDAMB231_24H:F01	BRD-K74765201	tomelukast	MDAMB231	trt_cp	0.22 uM	24 h	2	218	0.4233	0.307173	0	0	1	1	0	Leukotriene receptor antagonist	CYSLTR1	-0.5731	1.062	-1.4887
REP.A024_HA1E_24H:L01	BRD-K45275534	betrixaban	HA1E	trt_cp	10 uM	24 h	3	293	0.4232	0.356071	1	1	1	1	0	Coagulation factor inhibitor	F10|KCNH2	-0.573	1.0616	-1.4885
CPC018_PHH_24H:BRD-K12932420-001-01-5:10	BRD-K12932420	YM-976	PHH	trt_cp	10 uM	24 h	3	162	0.41	0.260603	0	0	1	1	0	Phosphodiesterase inhibitor	PDE4A|PDE4B|PDE4C|PDE4D|TNF	-0.5729	1.0613	-1.4884
LJP006_HA1E_24H:H09	BRD-K50168500	canertinib	HA1E	trt_cp	1.11 uM	24 h	3	83	0.42	0.188797	1	1	1	1	0	EGFR inhibitor	EGFR|ERBB2|ERBB4|AKT1	-0.5729	1.0613	-1.4883
REP.B026_MCF7_24H:G01	BRD-M89827113	levcromakalim	MCF7	trt_cp	2.22 uM	24 h	2	124	0.3513	0.211048	1	1	1	1	0	Potassium channel activator	KCNJ8	-0.5729	1.0603	-1.4882
REP.A010_HEK293_24H:I01	BRD-K13646352	midostaurin	HEK293	trt_cp	10 uM	24 h	3	263	0.3783	0.318953	1	1	1	1	0	FLT3 inhibitor|KIT inhibitor|PKC inhibitor	FLT3|KIT|CCNB1|FLT1|KDR|PDGFRB|PRKCA|VEGFA|PRKCG	-0.5728	1.0581	-1.4881
CPC016_HEPG2_6H:BRD-K06147391-300-04-3:10	BRD-K06147391	telenzepine	HEPG2	trt_cp	10 uM	6 h	3	294	0.09	0.164485	1	0	1	1	0	Acetylcholine receptor antagonist	CHRM1	-0.5728	1.0582	-1.4881
REP.B010_MCF10A_24H:I20	BRD-K14175878	MK-0812	MCF10A	trt_cp	0.74 uM	24 h	2	119	0.3523	0.207043	0	0	1	1	0	CC chemokine receptor antagonist	CCR2	-0.5728	1.0585	-1.4881
REP.A003_HT29_24H:I13	BRD-A34006693	suprofen	HT29	trt_cp	10 uM	24 h	3	295	0.1453	0.209351	0	0	1	1	0	Cyclooxygenase inhibitor	PTGS1|PTGS2	-0.5729	1.0588	-1.4881
CPC006_HEPG2_6H:BRD-K73789395-001-06-5:102.71	BRD-K73789395	ZM-336372	HEPG2	trt_cp	100 uM	6 h	3	193	0.41	0.284447	1	1	1	1	0	RAF inhibitor	BRAF|LCK|MAPK14|RAF1	-0.5727	1.0579	-1.4878
LCP001_MCF10A.WT_3H:B12	BRD-K41524689	paracetamol	MCF10A	trt_cp	1.67 uM	3 h	3	106	0.48	0.228089	1	1	1	1	0	Cyclooxygenase inhibitor	PTGS1|PTGS2|CYP2E1|FAAH|TRPV1	-0.5725	1.0579	-1.4873
REP.A002_YAPC_24H:D13	BRD-K16195444	oxymetazoline	YAPC	trt_cp	10 uM	24 h	2	105	0.1198	0.113411	0	0	1	1	0	Adrenergic receptor agonist	ADRA1A|ADRA2A|ADRA1B|ADRA1D|ADRA2B|ADRA2C|CYP2C19|HTR1B|HTR1D|HTR2C	-0.5725	1.0579	-1.4873
REP.B011_HEK293_24H:J22	BRD-K06858286	cabazitaxel	HEK293	trt_cp	0.08 uM	24 h	2	167	0.2387	0.20189	0	0	1	1	0	Tubulin inhibitor	CYP2C8|CYP3A5|SLCO1B3|TUBA4A|TUBB|TUBB1	-0.5725	1.0579	-1.4872
REP.B007_PC3_24H:P16	BRD-K51033547	tramadol	PC3	trt_cp	0.08 uM	24 h	2	131	0.1861	0.157884	1	0	1	1	0	Opioid receptor agonist|Norepinephrine reuptake inhibitor|Serotonin reuptake inhibitor	OPRM1|SLC6A2|SLC6A4|CYP2B6|CHRFAM7A|CHRM3|GRIN3A|HTR2C|OPRD1|OPRK1	-0.5725	1.0579	-1.4871
CPC016_ASC_24H:BRD-K37561857-001-06-4:10	BRD-K37561857	zardaverine	ASC	trt_cp	10 uM	24 h	3	163	0.35	0.241523	1	0	1	1	0	Phosphodiesterase inhibitor	PDE4D|PDE3A|PDE4A|PDE4B|PDE4C	-0.5724	1.0579	-1.4869
REP.B010_HEK293_24H:E03	BRD-K12885236	dapivirine	HEK293	trt_cp	0.25 uM	24 h	2	100	0.2755	0.167838	0	0	1	1	0	Non-nucleoside reverse transcriptase inhibitor	CYP3A5|CYP2B6|CYP2C19|CYP2C8|CYP3A4	-0.5723	1.0579	-1.4868
REP.B026_HELA_24H:J01	BRD-K91111634	rotigotine	HELA	trt_cp	2.22 uM	24 h	2	62	0.1512	0.0979044	1	0	1	1	0	Dopamine receptor agonist	DRD2|DRD3|DRD4|DRD1|DRD5|ADRA2B|HTR1A	-0.5723	1.0579	-1.4868
REP.A011_A375_24H:I01	BRD-K06294530	UK-383367	A375	trt_cp	10 uM	24 h	3	234	0.3598	0.293406	0	0	1	1	0	Procollagen C-Endopeptidase Inhibitors	BMP1	-0.5723	1.0579	-1.4868
CPC006_THP1_6H:L24	BRD-K68548958	C-646	THP1	trt_cp	20 uM	6 h	2	154	0.3875	0.247017	1	1	1	1	0	Histone acetyltransferase inhibitor	EP300	-0.5723	1.0579	-1.4868
LJP008_A549_24H:H07	BRD-K53328210	JW-55	A549	trt_cp	10 uM	24 h	2	104	0.1652	0.132542	1	1	1	1	0	Tankyrase inhibitor	TNKS|TNKS2	-0.5723	1.0579	-1.4868
EMU001_OCILY3_24H:B14	BRD-K98795921	SB-2343	OCILY3	trt_cp	2.5 uM	24 h	3	596	0.7835	0.690992	0	0	1	1	0	MTOR inhibitor|PI3K inhibitor	MTOR|PIK3CA|PIK3CB|PIK3CD|PIK3CG	-0.5722	1.0579	-1.4866
CPC006_SW480_6H:BRD-A30655177-001-08-2:111.11	BRD-A30655177	LFM-A13	SW480	trt_cp	100 uM	6 h	2	164	0.19	0.178496	0	0	1	1	0	BTK inhibitor	BTK	-0.5722	1.0579	-1.4866
CPC016_HEPG2_6H:BRD-K42221274-003-02-8:10	BRD-K42221274	NNC-711	HEPG2	trt_cp	10 uM	6 h	3	94	0.06	0.0759399	1	0	1	1	0	GAT inhibitor	SLC6A1|SIGMAR1	-0.5723	1.0579	-1.4866
AICHI002_HBL1_24H:I19	BRD-K53734668	PRT-062607	HBL1	trt_cp	10 uM	24 h	3	496	0.7	0.595827	1	1	1	1	0	Syk inhibitor	SYK|FGR|MAP3K9	-0.5722	1.0579	-1.4864
CPC010_VCAP_6H:BRD-K70578146-001-03-4:10	BRD-K70578146	dactinomycin	VCAP	trt_cp	10 uM	6 h	3	612	0.61	0.617833	0	0	1	1	0	RNA polymerase inhibitor	POLR2A	-0.5722	1.0579	-1.4864
CPC017_SKB_24H:BRD-K43330982-001-01-5:10	BRD-K43330982	JTE-013	SKB	trt_cp	10 uM	24 h	2	201	0.36	0.272007	0	0	1	1	0	Lysophospholipid receptor antagonist	S1PR2|P2RY10	-0.5722	1.0579	-1.4864
REP.A003_HT29_24H:I01	BRD-A33711280	metixene	HT29	trt_cp	10 uM	24 h	3	401	0.4541	0.431498	0	0	1	1	0	Acetylcholine receptor antagonist	CHRM5|CHRM1|CHRM2|CHRM3|CHRM4	-0.5721	1.0579	-1.4862
CPC006_NCIH2073_6H:BRD-K54233340-300-01-0:10	BRD-K54233340	dorsomorphin	NCIH2073	trt_cp	10 uM	6 h	2	339	0.56	0.44058	0	0	1	1	0	AMPK inhibitor	ACVR1|BMPR1A|BMPR1B|EPHA2|FKBP1A|FLT1|FLT3|KDR|LCK|MKNK1|PRKAA1|RPS6KA1|SRC	-0.5719	1.0579	-1.4858
REP.A017_HA1E_24H:I19	BRD-A65013509	oxybutynin	HA1E	trt_cp	10 uM	24 h	3	202	0.2429	0.223986	1	1	1	1	0	Acetylcholine receptor antagonist	CHRM3|CHRM2|CHRM1|CHRM4	-0.572	1.0579	-1.4858
CPC016_A549_6H:BRD-K69837166-003-01-2:10	BRD-K69837166	trap-101	A549	trt_cp	10 uM	6 h	2	201	0.43	0.297278	0	0	1	1	0	Opioid receptor antagonist|Nociceptin/orphanin FQ (NOP) receptor antagonist	OPRL1	-0.5719	1.0579	-1.4857
CPC011_HT29_6H:BRD-K39621635-001-04-8:10	BRD-K39621635	artemether	HT29	trt_cp	10 uM	6 h	4	116	0.11	0.114224	1	0	1	1	0	Antimalarial	CYP2B6|CYP2C19|CYP3A5|ATP1A1	-0.5718	1.0579	-1.4855
LJP001_SKBR3_6H:BRD-K68407802-001-02-7:0.4	BRD-K68407802	KIN001-055	SKBR3	trt_cp	0.37 uM	6 h	4	306	0.49	0.391552	1	1	1	1	0	EGFR inhibitor|JAK inhibitor|Leukotriene inhibitor|Mediator release inhibitor	JAK3	-0.5718	1.0579	-1.4855
CPC020_PC3_24H:BRD-K60762818-003-22-9:10	BRD-K60762818	desipramine	PC3	trt_cp	10 uM	24 h	5	98	0.15	0.1226	1	0	1	1	0	Tricyclic antidepressant	SLC6A2|SLC6A4|ADRA1A|ADRA1B|ADRA1D|ADRA2A|ADRA2B|ADRA2C|ADRB1|ADRB2|CHRM1|CHRM2|CHRM3|CHRM4|CHRM5|DRD2|HRH1|HTR1A|HTR2A|HTR2C|SMPD1	-0.5718	1.0579	-1.4854
CPC017_A375_6H:BRD-K11927976-050-01-1:10	BRD-K11927976	ER-27319	A375	trt_cp	10 uM	6 h	2	568	0.66	0.619123	0	0	1	1	0	Syk inhibitor	SYK	-0.5718	1.0579	-1.4854
REP.A009_HT29_24H:E01	BRD-A29485665	bicalutamide	HT29	trt_cp	10 uM	24 h	3	382	0.4602	0.42397	0	0	1	1	0	Androgen receptor antagonist	AR|CYP2C19	-0.5717	1.0579	-1.4852
REP.B009_A549_24H:J10	BRD-K30550578	PF-04620110	A549	trt_cp	0.08 uM	24 h	2	46	0.1154	0.0736737	1	0	1	1	0	Diacylglycerol O acyltransferase inhibitor	DGAT1	-0.5717	1.0579	-1.4851
REP.B025_MCF10A_24H:M02	BRD-K77685957	dequalinium	MCF10A	trt_cp	0.74 uM	24 h	2	56	0.2821	0.127094	1	1	1	1	0	PKC inhibitor	KCNN1|KCNN3	-0.5716	1.0579	-1.4849
CPC015_NPC_24H:BRD-K66874953-004-01-3:10	BRD-K66874953	pifithrin-alpha	NPC	trt_cp	10 uM	24 h	4	486	0.27	0.366295	0	0	1	1	0	p53 inhibitor	TP53	-0.5715	1.0579	-1.4847
REP.A016_A375_24H:L01	BRD-K54847683	equol	A375	trt_cp	10 uM	24 h	3	150	0.3863	0.24341	1	1	1	1	0	Estrogen receptor agonist	ESR2|ESR1	-0.5715	1.0579	-1.4847
CPC002_HA1E_24H:BRD-K93480852-001-02-2:10	BRD-K93480852	KN-93	HA1E	trt_cp	10 uM	24 h	2	229	0.47	0.33174	1	1	1	1	0	Calcium channel blocker	CAMK2A	-0.5714	1.0574	-1.4845
ERG004_VCAP_24H:BRD-K11399644-003-03-0:30	BRD-K11399644	phenformin	VCAP	trt_cp	30 uM	24 h	4	82	0.33	0.166339	1	1	1	1	0	AMPK activator	KCNJ8|PRKAA1	-0.5714	1.0572	-1.4844
REP.A001_HT29_24H:B23	BRD-K25394294	oxaprozin	HT29	trt_cp	0.125 uM	24 h	3	233	0.3132	0.273161	0	0	1	1	0	Cyclooxygenase inhibitor	PTGS1|PTGS2	-0.5714	1.0573	-1.4844
CPC005_A375_24H:BRD-K69023402-001-02-5:10	BRD-K69023402	thapsigargin	A375	trt_cp	10 uM	24 h	3	619	0.82	0.720415	1	1	1	1	0	ATPase inhibitor	ATP2A1	-0.5714	1.0573	-1.4844
LJP008_HA1E_24H:F19	BRD-K98203492	GSK-J4	HA1E	trt_cp	10 uM	24 h	2	141	0.3978	0.239482	1	1	1	1	0	Histone lysine demethylase inhibitor	KDM6A|KDM6B|TNF	-0.5714	1.0563	-1.4843
CPC014_PHH_24H:BRD-K09790412-001-03-8:10	BRD-K09790412	H-9	PHH	trt_cp	10 uM	24 h	4	163	0.27	0.212132	0	0	1	1	0	PKA inhibitor	PRKACA	-0.5714	1.0565	-1.4843
REP.B017_YAPC_24H:O24	BRD-A61767428	ursolic-acid	YAPC	trt_cp	0.01 uM	24 h	2	224	0.2939	0.25945	1	1	1	1	0	11-beta-HSD1 inhibitor|Acetylcholinesterase inhibitor|Caspase inhibitor|HIV protease inhibitor|Lipid peroxidase inhibitor|Quorum sensing signaling modulator|Steryl sulfatase inhibitor|Tyrosine phosphatase inhibitor|ATPase inhibitor|NFKB inhibitor|STAT inhibitor	HSD11B1|PTPN1|ACHE|CASP3|STS|PLA2G1B|PYGM	-0.5713	1.0491	-1.4842
REP.A023_A375_24H:N07	BRD-K72005722	VT-464	A375	trt_cp	10 uM	24 h	3	81	0.2152	0.133504	1	1	1	1	0	Cytochrome P450 inhibitor	CYP17A1	-0.5712	1.0479	-1.4839
REP.A004_HEK293_24H:H22	BRD-K22822991	odanacatib	HEK293	trt_cp	0.37 uM	24 h	2	200	0.5037	0.320946	0	0	1	1	0	Cathepsin inhibitor	CTSK	-0.5711	1.0449	-1.4837
REP.A001_HELA_24H:E13	BRD-A26690767	saquinavir	HELA	trt_cp	10 uM	24 h	3	173	0.2828	0.223663	1	1	1	1	0	HIV inhibitor	CYP3A5|CYP3A4	-0.5711	1.0396	-1.4836
REP.A024_HELA_24H:I01	BRD-A76747559	rutin	HELA	trt_cp	10 uM	24 h	3	224	0.4113	0.306926	1	1	1	1	0	Antioxidant|Capillary stabilizing agent|Nitric oxide scavenger	AKR1C3|AKR1B1	-0.5711	1.0387	-1.4835
REP.A026_HA1E_24H:F01	BRD-K89162000	tandutinib	HA1E	trt_cp	10 uM	24 h	2	326	0.5676	0.434971	0	0	1	1	0	FLT3 inhibitor|KIT inhibitor|PDGFR inhibitor	FLT3|KIT|PDGFRA|PDGFRB|CSF1R|PDGFD	-0.571	1.0383	-1.4834
LJP006_MCF10A_3H:G17	BRD-K88378636	withaferin-a	MCF10A	trt_cp	0.12 uM	3 h	2	89	0.5338	0.220402	1	1	1	1	0	IKK inhibitor	IKBKB|NAMPT	-0.571	1.0383	-1.4834
REP.A004_HEK293_24H:A19	BRD-A19195498	trimipramine	HEK293	trt_cp	10 uM	24 h	3	132	0.2963	0.199979	0	0	1	1	0	Norepinephrine inhibitor|Tricyclic antidepressant	SLC6A2|SLC6A4|SLC6A3|ADRA1A|ADRA1B|ADRA2A|ADRA2B|ADRB1|ADRB2|ADRB3|CHRM1|CHRM2|CHRM3|CHRM4|CHRM5|DRD1|DRD2|DRD5|HRH1|HTR1A|HTR1D|HTR2A|HTR2C|HTR3A	-0.571	1.0381	-1.4833
LKCP001_U2OS_6H:H18	BRD-K12867552	PCI-24781	U2OS	trt_cp	0.12 uM	6 h	4	147	0.3716	0.236334	1	1	1	1	0	HDAC inhibitor	HDAC1|HDAC2|HDAC3|HDAC6|HDAC10|HDAC8	-0.5709	1.0379	-1.4832
REP.A022_HEK293_24H:H24	BRD-K71221037	birinapant	HEK293	trt_cp	0.04 uM	24 h	2	108	0.1333	0.121327	0	0	1	1	0	XIAP inhibitor	BIRC2|XIAP|BIRC3	-0.5709	1.0369	-1.483
CPC018_ASC_24H:BRD-K37814297-050-05-4:10	BRD-K37814297	acepromazine	ASC	trt_cp	10 uM	24 h	3	82	0.1	0.0915667	1	0	1	1	0	Dopamine receptor antagonist	ADRA1A|ADRA1B|DRD1|DRD2|HTR1A|HTR2A	-0.5708	1.0366	-1.4829
CPC014_HCC515_6H:BRD-K80725632-001-04-8:10	BRD-K80725632	lavendustin-c	HCC515	trt_cp	10 uM	6 h	3	344	0.14	0.221908	1	0	1	1	0	EGFR inhibitor	CAMK2A|EGFR|SRC	-0.5707	1.0306	-1.4827
REP.A003_HELA_24H:F13	BRD-K32501161	vanoxerine	HELA	trt_cp	10 uM	24 h	3	480	0.5818	0.534365	1	1	1	1	0	Dopamine receptor antagonist	SLC6A3|MAOA|MAOB	-0.5707	1.029	-1.4826
REP.A023_YAPC_24H:G06	BRD-K35189033	levonorgestrel	YAPC	trt_cp	0.04 uM	24 h	3	90	0.0687	0.0795115	1	0	1	1	0	Estrogen receptor agonist|Glucocorticoid receptor antagonist|Progesterone receptor agonist|Progesterone receptor antagonist	PGR|CYP2E1|AR|ESR1|SRD5A1	-0.5707	1.0293	-1.4826
REP.A021_MCF10A_24H:P24	BRD-K86882815	cabergoline	MCF10A	trt_cp	0.04 uM	24 h	2	147	0.2454	0.192055	1	1	1	1	0	Dopamine receptor agonist	DRD2|ADRA1A|ADRA2A|ADRA2B|ADRA2C|DRD1|DRD3|DRD4|DRD5|HTR1A|HTR1B|HTR1D|HTR2A|HTR2B|HTR2C|PRL|ADRA1B|ADRA1D|ADRB1|ADRB2|HTR7	-0.5707	1.0294	-1.4826
CPC002_VCAP_24H:BRD-K16664969-001-02-5:10	BRD-K16664969	GTP-14564	VCAP	trt_cp	10 uM	24 h	3	125	0.14	0.133767	1	0	1	1	0	FLT3 inhibitor|Tyrosine kinase inhibitor	FLT3|CSF1R|KIT|PDGFRB	-0.5707	1.0294	-1.4826
CPC018_HT29_6H:BRD-K15601958-001-01-3:10	BRD-K15601958	SEW-2871	HT29	trt_cp	10 uM	6 h	5	130	0.02	0.0515605	1	0	1	1	0	Lysophospholipid receptor agonist	S1PR1	-0.5707	1.0287	-1.4825
CPC016_ASC_24H:BRD-K62996583-001-03-8:10	BRD-K62996583	lidoflazine	ASC	trt_cp	10 uM	24 h	3	193	0.42	0.287895	1	0	1	1	0	Calcium channel blocker	SCN1A|SCN3A|SLC29A1	-0.5707	1.0289	-1.4825
DOSVAL004_HCC515_24H:BRD-K21680192:5	BRD-K21680192	mitoxantrone	HCC515	trt_cp	4 uM	24 h	3	582	0.52	0.55628	1	1	1	1	0	Topoisomerase inhibitor	TOP2A|PIM1	-0.5707	1.0286	-1.4824
MOAR007_PC3_24H:C04	BRD-K73999723	telmisartan	PC3	trt_cp	10 uM	24 h	3	287	0.49	0.379201	1	1	1	1	0	Angiotensin receptor antagonist	AGTR1|PPARG|CYP2C19|CYP2J2|PPARA	-0.5706	1.0286	-1.4823
REP.A009_HT29_24H:N13	BRD-K33610132	rociletinib	HT29	trt_cp	10 uM	24 h	3	499	0.7482	0.617859	0	0	1	1	0	EGFR inhibitor	EGFR	-0.5706	1.0286	-1.4823
CPC016_NPC_24H:BRD-K31627533-001-03-8:10	BRD-K31627533	rimexolone	NPC	trt_cp	10 uM	24 h	4	105	0.06	0.0802603	0	0	1	1	0	Glucocorticoid receptor agonist	NR3C1|SERPINA6	-0.5705	1.0286	-1.482
CPC003_HA1E_24H:BRD-K72462751-001-01-9:10	BRD-K72462751	C-1	HA1E	trt_cp	10 uM	24 h	3	494	0.5	0.50255	1	0	1	1	0	Protein kinase inhibitor	PRKCA	-0.5705	1.0286	-1.482
CPC014_HEPG2_6H:BRD-K62012036-001-06-0:10	BRD-K62012036	acitretin	HEPG2	trt_cp	10 uM	6 h	3	438	0.03	0.115912	1	0	1	1	0	Retinoid receptor agonist	RARA|RXRG|RARB|RARG|RBP1|RXRA|RXRB|STAT3	-0.5705	1.0286	-1.4819
REP.B013_MCF7_24H:A23	BRD-K37561857	zardaverine	MCF7	trt_cp	0.03 uM	24 h	2	64	0.2175	0.119303	0	0	1	1	0	Phosphodiesterase inhibitor	PDE4D|PDE3A|PDE4A|PDE4B|PDE4C	-0.5705	1.0286	-1.4819
CPC006_MCF7_24H:D17	BRD-K53792571	inhibitor-BEC	MCF7	trt_cp	80 uM	24 h	5	203	0.3308	0.262036	1	1	1	1	0	Arginase inhibitor	ARG2|ARG1	-0.5704	1.0286	-1.4818
CPC014_PC3_24H:BRD-K07736136-001-01-2:10	BRD-K07736136	VX-702	PC3	trt_cp	10 uM	24 h	5	535	0.67	0.605403	0	0	1	1	0	P38 MAPK inhibitor	MAPK14|MAPK11|MAPK12	-0.5704	1.0286	-1.4818
REP.A017_HA1E_24H:P03	BRD-K63861289	molsidomine	HA1E	trt_cp	1.11 uM	24 h	3	509	0.7047	0.605608	1	1	1	1	0	Guanylyl cyclase activator	GUCY1A3	-0.5704	1.0286	-1.4817
CPC014_A375_6H:N16	BRD-K85985071	ellipticine	A375	trt_cp	10 uM	6 h	2	290	0.4267	0.355706	1	1	1	1	0	Topoisomerase inhibitor	TOP2A|TOP2B	-0.5703	1.0286	-1.4816
CPC006_NCIH596_6H:BRD-K86191271-001-02-7:10	BRD-K86191271	cytosporone-b	NCIH596	trt_cp	10 uM	6 h	2	89	0.02	0.0426619	1	0	1	1	0	NUR77 receptor agonist	NR4A1	-0.5703	1.0286	-1.4816
CPC018_SKB_24H:BRD-A29082194-001-02-4:10	BRD-A29082194	gitoxigenin	SKB	trt_cp	10 uM	24 h	3	362	0.63	0.482898	1	1	1	1	0	Na/K-ATPase inhibitor	ATP1A1	-0.5703	1.0286	-1.4815
REP.B018_PC3_24H:H24	BRD-A64406146	timofibrate	PC3	trt_cp	0.01 uM	24 h	2	85	0.1016	0.0939695	1	1	1	1	0	Cholesterol inhibitor|Lipase clearing factor inhibitor	LPL	-0.5703	1.0286	-1.4814
CPC018_NPC_24H:BRD-A72703248-003-03-1:10	BRD-A72703248	SKF-96365	NPC	trt_cp	10 uM	24 h	3	355	0.44	0.399642	0	0	1	1	0	Calcium channel blocker	CYP3A4|TRPC1|PKD2|TRPC3|TRPC4|TRPC5|TRPV2	-0.5702	1.0286	-1.4813
REP.A025_YAPC_24H:N07	BRD-A78195072	imexon	YAPC	trt_cp	10 uM	24 h	3	71	0.1699	0.11106	1	0	1	1	0	Apoptosis stimulant|Ribonucleoside reductase inhibitor	RRM1|RRM2	-0.5702	1.0286	-1.4812
CPC014_A375_6H:C19	BRD-K05804044	AZ-628	A375	trt_cp	10 uM	6 h	2	261	0.4266	0.337413	1	1	1	1	0	RAF inhibitor	BRAF|RAF1	-0.5701	1.0285	-1.4809
ABY001_NCIH2073_XH:BRD-K70401845:2.5:24	BRD-K70401845	erlotinib	NCIH2073	trt_cp	2.5 uM	24 h	3	251	0.42	0.328316	1	1	1	1	0	EGFR inhibitor	EGFR|NR1I2	-0.57	1.0285	-1.4808
REP.A019_MDAMB231_24H:N07	BRD-A49765801	BRD-A49765801	MDAMB231	trt_cp	10 uM	24 h	3	351	0.5674	0.451262	0	0	1	1	0	Glucocorticoid receptor agonist	NR3C1|SERPINA6	-0.5699	1.0284	-1.4806
CPC017_NPC_24H:BRD-A96485169-001-05-1:10	BRD-A96485169	EBPC	NPC	trt_cp	10 uM	24 h	4	141	0.13	0.136903	0	0	1	1	0	Aldose reductase inhibitor	AKR1B1	-0.5699	1.0284	-1.4805
CPC001_PC3_6H:BRD-A64227845-004-02-8:10	BRD-A64227845	SKF-77434	PC3	trt_cp	10 uM	6 h	4	167	0.28	0.218659	1	1	1	1	0	Dopamine receptor agonist	DRD1	-0.5699	1.0281	-1.4804
REP.A026_HUVEC.A_24H:C14	BRD-K88506063	KD-025	HUVEC	trt_cp	3.33 uM	24 h	3	210	0.3471	0.273003	0	0	1	1	0	Rho associated kinase inhibitor	ROCK2	-0.5699	1.0282	-1.4804
CPC006_NCIH596_6H:BRD-K49371609-310-01-1:0.09	BRD-K49371609	PIK-75	NCIH596	trt_cp	0.08 uM	6 h	2	398	0.53	0.464419	1	1	1	1	0	PI3K inhibitor	PIK3CA|PIK3CB|PIK3CD|PIK3CG|PRKDC	-0.5698	1.0281	-1.4803
CPC001_PC3_6H:BRD-K26573499-300-01-3:10	BRD-K26573499	DMAB-anabaseine	PC3	trt_cp	10 uM	6 h	4	124	0.09	0.106822	1	0	1	1	0	Adrenergic receptor agonist	CHRNA7	-0.5698	1.0281	-1.4803
CPC014_ASC_24H:BRD-K07265709-003-01-5:10	BRD-K07265709	razoxane	ASC	trt_cp	10 uM	24 h	3	175	0.33	0.243	1	1	1	1	0	Chelating agent|Topoisomerase inhibitor	TOP2A|TOP2B	-0.5698	1.0281	-1.4803
LUNG001_A549_24H:BRD-K14681867:10	BRD-K14681867	somatostatin	A549	trt_cp	10 uM	24 h	2	144	0.2596	0.195508	1	0	1	1	0	Somatostatin receptor agonist	SSTR1|SSTR2|SSTR3|SSTR4|SSTR5|GH1|GHR|OPRD1|OPRM1	-0.5698	1.0281	-1.4803
REP.A018_A549_24H:B13	BRD-K62200014	anagrelide	A549	trt_cp	10 uM	24 h	2	63	0.1497	0.0982001	1	1	1	1	0	Phosphodiesterase inhibitor	PDE3A	-0.5698	1.0281	-1.4802
CPC016_NPC_24H:BRD-K28453807-003-05-4:10	BRD-K28453807	nitrocaramiphen	NPC	trt_cp	10 uM	24 h	4	161	0.2	0.181451	0	0	1	1	0	Cholinergic receptor antagonist	CHRM1	-0.5698	1.0281	-1.4801
CPC006_H1299_6H:BRD-K12502280-001-01-5:11.1	BRD-K12502280	TG-101348	H1299	trt_cp	12 uM	6 h	2	360	0.54	0.44584	0	0	1	1	0	JAK inhibitor|FLT3 inhibitor	JAK2|FLT3|RET|BRD4|JAK1|JAK3|TYK2	-0.5698	1.0281	-1.4801
EMU001_OCILY19_24H:N20	BRD-K62391742	GDC-0199	OCILY19	trt_cp	2.5 uM	24 h	2	770	0.8394	0.812944	0	0	1	1	0	BCL inhibitor	BCL2	-0.5696	1.0281	-1.4797
EMU001_KMS34_24H:L01	BRD-K92428153	mycophenolate-mofetil	KMS34	trt_cp	10 uM	24 h	3	433	0.6856	0.550947	1	1	1	1	0	Inosine monophosphate dehydrogenase inhibitor|Dehydrogenase inhibitor|Hydroxycarboxylic acid receptor agonist|Immunosuppressant|Inositol monophosphatase inhibitor	IMPDH1|IMPDH2|HCAR2	-0.5695	1.0281	-1.4795
REP.B019_MCF10A_24H:D14	BRD-K45503887	delivert	MCF10A	trt_cp	0.74 uM	24 h	2	67	0.0176	0.0347236	1	1	1	1	0	Angiotensin receptor agonist	AGTR1|AGTR2	-0.5695	1.0281	-1.4794
NMH002_NEU_6H:BRD-A48430263-001-05-1:10	BRD-A48430263	pioglitazone	NEU	trt_cp	10 uM	6 h	3	93	0.14	0.115381	0	0	1	1	0	PPAR receptor agonist|Insulin sensitizer	PPARG|INS|TRPM3	-0.5695	1.0281	-1.4794
REP.B008_YAPC_24H:B14	BRD-A36010170	amcinonide	YAPC	trt_cp	0.74 uM	24 h	2	126	0.1561	0.141813	0	0	1	1	0	Glucocorticoid receptor agonist	NR3C1|ANXA1	-0.5694	1.0281	-1.4793
REP.B024_MCF7_24H:F02	BRD-K74765201	tomelukast	MCF7	trt_cp	0.08 uM	24 h	2	77	0.1847	0.120589	0	0	1	1	0	Leukotriene receptor antagonist	CYSLTR1	-0.5694	1.0281	-1.4792
CPC018_SKB_24H:BRD-A89337244-001-01-1:10	BRD-A89337244	PD-102807	SKB	trt_cp	10 uM	24 h	3	259	0.45	0.345213	0	0	1	1	0	Acetylcholine receptor antagonist	CHRM4	-0.5694	1.0281	-1.4792
REP.A011_MDAMB231_24H:P19	BRD-A33280134	etoposide	MDAMB231	trt_cp	10 uM	24 h	3	276	0.4214	0.344852	0	0	1	1	0	Topoisomerase inhibitor	TOP2A|TOP2B|CYP2E1|CYP3A5	-0.5694	1.0281	-1.4791
AICHI001_TMD8_4H:K01	BRD-K92428232	GSK-461364	TMD8	trt_cp	10 uM	4 h	3	506	0.7	0.601804	1	1	1	1	0	PLK inhibitor	PLK1	-0.5694	1.0281	-1.4791
CPC004_HCC515_6H:BRD-A55416093-001-03-1:10	BRD-A55416093	colforsin	HCC515	trt_cp	10 uM	6 h	3	281	0.4	0.339011	1	0	1	1	0	Adenylyl cyclase activator	ADCY2|ADCY5	-0.5692	1.0281	-1.4787
REP.A006_HT29_24H:I01	BRD-K21547160	sufentanil	HT29	trt_cp	10 uM	24 h	3	213	0.4567	0.315381	1	1	1	1	0	Opioid receptor modulator	OPRM1|OPRD1|OPRK1	-0.5691	1.0281	-1.4784
REP.A016_A549_24H:I07	BRD-K53963539	vortioxetine	A549	trt_cp	10 uM	24 h	3	248	0.4561	0.340084	1	1	1	1	0	Serotonin receptor agonist|Serotonin receptor antagonist	HTR1A|HTR1B|HTR7|SLC6A4|HTR1D|CYP2B6|CYP2C19|CYP2C8|CYP3A5|HTR2A|HTR2C|HTR3A|HTR5A|HTR6	-0.5691	1.0281	-1.4784
LIVB002_HUH7_72H:E04	BRD-K70507123	doxofylline	HUH7	trt_cp	12.5 uM	72 h	3	152	0.27	0.204849	0	0	1	1	0	Adenosine receptor antagonist	ADORA1|PDE4A|PDE4B|PDE4C|PDE4D	-0.569	1.0281	-1.4783
REP.B008_HA1E_24H:G01	BRD-K60038276	irbesartan	HA1E	trt_cp	2.22 uM	24 h	2	117	0.2921	0.186934	1	1	1	1	0	Angiotensin receptor antagonist	AGTR1|JUN|SLC10A1	-0.5691	1.0281	-1.4783
CPC018_NPC_24H:BRD-K06980535-003-15-0:10	BRD-K06980535	promazine	NPC	trt_cp	10 uM	24 h	3	245	0.33	0.287522	0	0	1	1	0	Dopamine receptor antagonist	CHRM5|DRD2|ADRA1A|ADRA1B|ADRA1D|CHRM1|CHRM2|CHRM3|CHRM4|DRD1|DRD3|DRD4|HRH1|HTR2A|HTR2C	-0.569	1.0281	-1.4782
CPC016_NEU_24H:BRD-A19661776-003-13-6:10	BRD-A19661776	mianserin	NEU	trt_cp	10 uM	24 h	3	275	0.39	0.331153	0	0	1	1	0	Serotonin receptor antagonist	HTR2A|HTR2C|ADRA1A|ADRA1B|ADRA1D|HRH1|HTR2B|HTR6|HTR7|ADRA2A|ADRA2B|ADRA2C|DRD1|DRD2|DRD3|DRD5|HRH2|HRH4|HTR1A|HTR1F|OPRK1|SLC6A2|SLC6A3|SLC6A4	-0.569	1.0281	-1.4781
REP.A004_PC3_24H:P11	BRD-A26423207	sparfloxacin	PC3	trt_cp	0.125 uM	24 h	3	150	0.3249	0.223229	1	1	1	1	0	Bacterial DNA Gyrase inhibitor	TOP2A	-0.5689	1.0281	-1.478
CPC016_MCF7_24H:BRD-K87510569-001-01-0:10	BRD-K87510569	RS-504393	MCF7	trt_cp	10 uM	24 h	4	182	0.27	0.224155	1	1	1	1	0	CC chemokine receptor antagonist	CCR2|CCL2	-0.5689	1.0281	-1.478
REP.A027_MCF10A_24H:F20	BRD-K95773607	darifenacin	MCF10A	trt_cp	3.33 uM	24 h	3	120	0.0991	0.11027	0	0	1	1	0	Acetylcholine receptor antagonist	CHRM3|CHRM1|CHRM2|CHRM4|CHRM5	-0.5688	1.0281	-1.4777
LJP005_HS578T_3H:L19	BRD-K49669041	BX-912	HS578T	trt_cp	10 uM	3 h	2	186	0.4478	0.291829	1	1	1	1	0	PDK inhibitor	PDPK1|AKT2|CDK2|CHEK1|GSK3B|KDR|PDK1	-0.5688	1.0281	-1.4776
CPC004_A375_6H:BRD-K12539581-001-14-6:10	BRD-K12539581	nocodazole	A375	trt_cp	10 uM	6 h	3	117	0.44	0.22943	1	1	1	1	0	Tubulin inhibitor	HPGDS	-0.5688	1.0281	-1.4776
CPC010_A375_6H:M20	BRD-K00234327	RU-24969	A375	trt_cp	10 uM	6 h	3	284	0.1484	0.20759	1	0	1	1	0	Serotonin receptor agonist	HTR1A|HTR1B|HTR6|HTR1D|HTR2A|HTR2B|HTR2C|HTR5A	-0.5687	1.0281	-1.4775
REP.A022_A375_24H:E05	BRD-K68747584	PF-03814735	A375	trt_cp	0.125 uM	24 h	3	228	0.4516	0.32447	1	1	1	1	0	Aurora kinase inhibitor	AURKA|AURKB	-0.5688	1.0281	-1.4775
REP.B026_JURKAT_24H:J22	BRD-K91315211	betahistine	JURKAT	trt_cp	0.08 uM	24 h	2	94	0.1211	0.107886	0	0	1	1	0	Histamine receptor agonist|Histamine receptor antagonist	HRH3|HRH1	-0.5688	1.0281	-1.4775
REP.B009_YAPC_24H:B11	BRD-K26823213	GW-842166	YAPC	trt_cp	0.03 uM	24 h	2	477	0.5442	0.515192	0	0	1	1	0	Cannabinoid receptor agonist	CNR2	-0.5687	1.0281	-1.4774
CPC006_U937_6H:BRD-K80527266-001-01-7:10	BRD-K80527266	triacsin-c	U937	trt_cp	10 uM	6 h	2	263	0.24	0.254047	1	1	1	1	0	Adrenergic receptor antagonist	ACSL1	-0.5686	1.0281	-1.477
REP.B023_HELA_24H:N24	BRD-K72166146	BRD-K72166146	HELA	trt_cp	0.01 uM	24 h	2	135	0.2434	0.183298	1	0	1	1	0	Serotonin receptor agonist	HTR1D|HTR1B|ADRA2A|DRD2|HTR1E|HTR1F|HTR2B|HTR7	-0.5685	1.0281	-1.4769
LPROT004_YAPC_6H:BRD-K87465484:0.5	BRD-K87465484	UNC-0646	YAPC	trt_cp	0.5 uM	6 h	3	150	0.6	0.303355	1	1	1	1	0	Histone lysine methyltransferase inhibitor	EHMT2	-0.5684	1.0281	-1.4767
REP.B021_HT29_24H:O09	BRD-K86307448	allopurinol	HT29	trt_cp	0.25 uM	24 h	2	46	0.1132	0.072968	1	1	1	1	0	Xanthine oxidase inhibitor	XDH	-0.5685	1.0281	-1.4767
CPC006_U937_6H:BRD-K17140735-300-02-4:11.1	BRD-K17140735	SCH-79797	U937	trt_cp	12 uM	6 h	2	601	0.67	0.64166	0	0	1	1	0	Proteasome inhibitor	F2R	-0.5685	1.0281	-1.4767
LJP007_A375_24H:J01	BRD-K50000283	PHA-767491	A375	trt_cp	10 uM	24 h	3	650	0.7064	0.685192	1	1	1	1	0	CDC inhibitor	CDK1|RPS6KB1	-0.5685	1.0281	-1.4767
LJP009_HCC515_24H:D01	BRD-K37764012	PF-03758309	HCC515	trt_cp	10 uM	24 h	3	649	0.7267	0.694433	0	0	1	1	0	P21 activated kinase inhibitor	PAK4	-0.5684	1.0281	-1.4766
CPC011_MCF7_24H:BRD-K11630072-001-09-0:10	BRD-K11630072	carmofur	MCF7	trt_cp	10 uM	24 h	2	250	0.17	0.208461	0	0	1	1	0	Thymidylate synthase inhibitor	TYMS	-0.5684	1.0281	-1.4765
CPC006_U937_6H:BRD-K41260949-236-02-8:10	BRD-K41260949	valproic-acid	U937	trt_cp	10 uM	6 h	2	38	0.15	0.0763428	1	0	1	1	0	HDAC inhibitor|GABA receptor agonist|Voltage-gated sodium channel blocker	HDAC1|SCN1A|SCN3A|ABAT|ALDH5A1|ACADSB|HDAC2|HDAC9|OGDH|SCN10A|SCN11A|SCN1B|SCN2A|SCN2B|SCN3B|SCN4A|SCN4B|SCN5A|SCN7A|SCN8A|SCN9A	-0.5683	1.0281	-1.4764
CPC006_A375_24H:BRD-K61662457-001-02-2:20	BRD-K61662457	CAY-10594	A375	trt_cp	20 uM	24 h	5	242	0.4	0.314607	1	1	1	1	0	Phospholipase inhibitor	PLD2	-0.5683	1.0281	-1.4763
REP.A020_HUVEC.A_24H:P01	BRD-K48812570	macitentan	HUVEC	trt_cp	10 uM	24 h	3	257	0.1724	0.212846	1	1	1	1	0	Endothelin receptor antagonist	EDNRA|EDNRB	-0.5682	1.0281	-1.4762
CPC016_NPC_24H:BRD-K85015012-003-01-1:10	BRD-K85015012	NNC-05-2090	NPC	trt_cp	10 uM	24 h	4	284	0.44	0.357451	0	0	1	1	0	GAT inhibitor|GABA uptake inhibitor	SLC6A11|SLC6A13|SLC6A12	-0.5682	1.0281	-1.476
REP.B017_MCF10A_24H:C07	BRD-K45542189	diethylcarbamazine	MCF10A	trt_cp	2.22 uM	24 h	2	38	0.1381	0.073252	1	1	1	1	0	Lipoxygenase inhibitor	ALOX5|PTGS1	-0.5682	1.0281	-1.476
LJP008_JURKAT_24H:O23	BRD-K09537769	NU-7026	JURKAT	trt_cp	0.12 uM	24 h	2	318	0.4523	0.383493	0	0	1	1	0	DNA inhibitor|MTOR inhibitor|PI3K inhibitor	PRKDC	-0.5682	1.0281	-1.4759
REP.B003_PC3_24H:B24	BRD-K31385749	ivabradine	PC3	trt_cp	0.01 uM	24 h	3	209	0.322	0.26232	1	0	1	1	0	HCN channel antagonist|Potassium channel blocker|Sodium channel inhibitor	HCN1|HCN3|HCN4|HCN2	-0.5681	1.0281	-1.4758
CPD003_MCF7_6H:BRD-K21548250-003-15-9:10	BRD-K21548250	moracizine	MCF7	trt_cp	10 uM	6 h	2	98	0.19	0.137981	0	0	1	1	0	Sodium channel inhibitor	SCN5A	-0.5681	1.0281	-1.4758
REP.B009_HELA_24H:D07	BRD-K28912512	nicotinamide	HELA	trt_cp	2.22 uM	24 h	2	145	0.3341	0.222563	1	1	1	1	0	Protein synthesis stimulant	PARP1|AOX1|CYP2E1|BST1|LDHA|SIRT5	-0.5681	1.0281	-1.4758
CPC006_HCT116_6H:BRD-K71799949-001-20-8:96	BRD-K71799949	carbamazepine	HCT116	trt_cp	100 uM	6 h	2	25	0.14	0.0598225	1	0	1	1	0	Carboxamide antiepileptic	SCN1A|SCN3A|SCN5A|ABCB1|CYP1A2|CYP3A4|SCN10A|SCN11A|SCN2A|SCN4A|SCN7A|SCN8A|SCN9A	-0.568	1.028	-1.4757
REP.B009_THP1_24H:L21	BRD-K31476763	AZD-9668	THP1	trt_cp	0.25 uM	24 h	2	176	0.2784	0.223832	0	0	1	1	0	Elastase inhibitor	ELANE	-0.5681	1.028	-1.4757
PBIOA016_HEPG2_24H:F20	BRD-K42828737	sunitinib	HEPG2	trt_cp	3.33 uM	24 h	3	297	0.49	0.385751	1	1	1	1	0	FLT3 inhibitor|KIT inhibitor|PDGFR inhibitor|RET inhibitor|VEGFR inhibitor	PDGFRB|FLT1|FLT3|FLT4|KDR|KIT|PDGFRA|RET	-0.568	1.028	-1.4756
REP.B025_HT29_24H:F01	BRD-A98702003	carbenoxolone	HT29	trt_cp	2.22 uM	24 h	2	271	0.5583	0.393323	1	1	1	1	0	11-beta-HSD1 inhibitor	HSD11B1|GJA1|GJA10|GJA3|GJA4|GJA5|GJA8|GJA9|GJB1|GJB2|GJB3|GJB4|GJB5|GJB6|GJB7|GJC1|GJC2|GJC3|GJD2|GJD3|GJD4|GJE1|PANX1|PANX2|PANX3	-0.568	1.0277	-1.4755
PAC003_U2OS_6H:BRD-K30867024-001-01-1:10	BRD-K30867024	SB-216641	U2OS	trt_cp	10 uM	6 h	2	144	0.16	0.153487	1	0	1	1	0	Serotonin receptor antagonist	HTR1D|HTR1B|HTR1A|HTR2A|HTR2B|HTR2C	-0.568	1.0279	-1.4755
CPC014_NEU_24H:BRD-K50140147-001-01-0:10	BRD-K50140147	NVP-TAE684	NEU	trt_cp	10 uM	24 h	2	108	0.49	0.232616	0	0	1	1	0	ALK inhibitor	ALK|INSR	-0.568	1.028	-1.4755
CPC016_NPC_24H:BRD-K08547377-003-03-2:10	BRD-K08547377	irinotecan	NPC	trt_cp	10 uM	24 h	4	289	0.34	0.316971	0	0	1	1	0	Topoisomerase inhibitor	TOP1|CYP3A5|TOP1MT	-0.568	1.028	-1.4755
REP.B012_PC3_24H:E03	BRD-K00674894	orteronel	PC3	trt_cp	0.25 uM	24 h	2	61	0.254	0.125867	0	0	1	1	0	Androgen receptor antagonist|Cytochrome P450 inhibitor	CYP17A1	-0.568	1.0266	-1.4754
REP.B018_A375_24H:A14	BRD-K62196610	AVN-944	A375	trt_cp	0.74 uM	24 h	2	262	0.569	0.390425	1	1	1	1	0	Inosine monophosphate dehydrogenase inhibitor	IMPDH2|IMPDH1	-0.5678	1.0266	-1.4751
CPC001_HCC515_24H:BRD-K15791587-003-01-7:10	BRD-K15791587	L-733060	HCC515	trt_cp	10 uM	24 h	3	140	0.26	0.192922	1	1	1	1	0	Tachykinin antagonist	TACR1	-0.5678	1.0266	-1.4751
REP.A026_PC3_24H:H16	BRD-A90547603	eptifibatide	PC3	trt_cp	0.37 uM	24 h	2	146	0.2181	0.180441	0	0	1	1	0	Platelet aggregation inhibitor	ITGA2B|ITGB3	-0.5678	1.0266	-1.475
CPC002_PC3_24H:BRD-A56987319-001-05-3:10	BRD-A56987319	SQ-22536	PC3	trt_cp	10 uM	24 h	5	422	0.15	0.254409	1	0	1	1	0	Adenylyl cyclase inhibitor	ADCY5|ADCY1	-0.5677	1.0266	-1.4749
CPC014_HA1E_6H:BRD-K85402309-001-01-7:10	BRD-K85402309	dovitinib	HA1E	trt_cp	10 uM	6 h	3	279	0.56	0.399693	1	1	1	1	0	EGFR inhibitor|FGFR inhibitor|FLT3 inhibitor|PDGFR inhibitor|VEGFR inhibitor	FGFR1|FLT1|KDR|EGFR|FGFR3|FLT3|FLT4|KIT|PDGFRB|CSF1R|FGFR2|INSR|PDGFRA	-0.5677	1.0266	-1.4748
REP.A022_HEK293_24H:F03	BRD-K69236721	VX-809	HEK293	trt_cp	1.11 uM	24 h	3	167	0.2198	0.193733	0	0	1	1	0	CFTR channel agonist	CFTR	-0.5677	1.0266	-1.4748
CPC003_HCC515_24H:BRD-A02759312-003-11-2:10	BRD-A02759312	betaxolol	HCC515	trt_cp	10 uM	24 h	3	231	0.15	0.188227	1	0	1	1	0	Adrenergic receptor antagonist	ADRB1|ADRB2	-0.5676	1.0266	-1.4746
REP.B008_HA1E_24H:C02	BRD-K36740062	GSK-1070916	HA1E	trt_cp	0.74 uM	24 h	2	169	0.396	0.26159	1	1	1	1	0	Aurora kinase inhibitor	AURKB|AURKC|AURKA|CYP2D6|CYP3A4	-0.5676	1.0266	-1.4744
CPC018_A375_6H:BRD-K06753942-001-06-1:10	BRD-K06753942	nobiletin	A375	trt_cp	10 uM	6 h	5	381	0.31	0.347515	0	0	1	1	0	MEK inhibitor	ABCB1|TYR|MAP2K1	-0.5675	1.0266	-1.4743
ASG003_A549_48H:G01	BRD-K66788707	fludarabine	A549	trt_cp	10 uM	48 h	5	113	0.3491	0.200837	1	1	1	1	0	DNA inhibitor	ADA|RRM1|RRM2	-0.5675	1.0266	-1.4743
REP.A003_JURKAT_24H:O15	BRD-K36467523	bindarit	JURKAT	trt_cp	1.11 uM	24 h	2	167	0.6949	0.344469	0	0	1	1	0	NFKB inhibitor	CCL2|CCL7|CCL8	-0.5675	1.0266	-1.4742
CPC018_SKB_24H:BRD-K97181089-003-14-8:10	BRD-K97181089	amiloride	SKB	trt_cp	10 uM	24 h	3	292	0.3	0.299283	0	0	1	1	0	Sodium channel inhibitor	SCNN1A|ASIC1|ASIC2|SCNN1B|SCNN1G|AOC1|ASIC3|PKD2|PKD2L1|PLAU|SCNN1D|SLC9A1|TRPC7|TRPV2	-0.5675	1.0266	-1.4741
LJP006_HME1_24H:B07	BRD-K23984367	sorafenib	HME1	trt_cp	10 uM	24 h	2	437	0.6484	0.538261	0	0	1	1	0	RAF inhibitor|FLT3 inhibitor|KIT inhibitor|PDGFR inhibitor|RET inhibitor|VEGFR inhibitor	RET|BRAF|FLT3|KDR|RAF1|FLT1|FLT4|KIT|DDR2|PDGFRB|FGFR1|CYP2B6|CYP2C8|CYP3A5|PDGFB|SLCO1B3	-0.5674	1.0266	-1.474
CPC010_A375_6H:L23	BRD-K54314721	zolmitriptan	A375	trt_cp	10 uM	6 h	3	454	0.1431	0.257738	1	0	1	1	0	Serotonin receptor agonist	HTR1B|HTR1D|HTR1A|HTR1F|HTR1E	-0.5674	1.0266	-1.474
REP.A024_A375_24H:B10	BRD-K73541271	etofenamate	A375	trt_cp	0.37 uM	24 h	3	112	0.209	0.154708	1	0	1	1	0	Cyclooxygenase inhibitor	PTGS1|PTGS2	-0.5674	1.0266	-1.474
CPC014_SKB_24H:BRD-K52911425-001-02-3:10	BRD-K52911425	GDC-0941	SKB	trt_cp	10 uM	24 h	4	330	0.46	0.393973	0	0	1	1	0	PI3K inhibitor	PIK3CG|PIK3CA|PIK3CB|PIK3CD	-0.5673	1.0264	-1.4737
CPC011_MCF7_24H:BRD-A23359898-001-06-2:10	BRD-A23359898	sibutramine	MCF7	trt_cp	10 uM	24 h	2	323	0.57	0.43388	0	0	1	1	0	Serotonin receptor antagonist	SLC6A2|SLC6A4|SLC6A3|CYP2B6|CYP2C19|CYP3A5	-0.5672	1.0231	-1.4735
REP.A004_HA1E_24H:M19	BRD-K25630527	LY-2784544	HA1E	trt_cp	10 uM	24 h	3	685	0.7338	0.71691	0	0	1	1	0	JAK inhibitor	JAK2|JAK3	-0.5672	1.0231	-1.4734
REP.A012_HT29_24H:A07	BRD-K00077635	estramustine-phosphate	HT29	trt_cp	10 uM	24 h	2	86	0.338	0.1724	0	0	1	1	0	DNA inhibitor|DNA alkylating agent|Estrogen receptor agonist|Tubulin inhibitor	ESR1|ESR2|MAP1A|MAP2	-0.5672	1.0231	-1.4734
REP.B027_PC3_24H:B19	BRD-K61443650	thiomersal	PC3	trt_cp	2.22 uM	24 h	2	243	0.5104	0.356114	1	1	1	1	0	Antibiotic	OXCT1	-0.5671	1.0231	-1.4733
CPC013_NEU_24H:BRD-K64881305-001-01-1:10	BRD-K64881305	ispinesib	NEU	trt_cp	10 uM	24 h	2	249	0.22	0.236669	0	0	1	1	0	Kinesin inhibitor	KIF11	-0.5671	1.0231	-1.4732
CPC017_HT29_6H:BRD-K68507560-003-15-4:10	BRD-K68507560	dicycloverine	HT29	trt_cp	10 uM	6 h	5	279	0.14	0.199847	0	0	1	1	0	Acetylcholine receptor antagonist	CHRM1|CHRM2|CHRM3	-0.567	1.0231	-1.473
REP.B008_MCF10A_24H:I23	BRD-K75024268	lesinurad	MCF10A	trt_cp	0.03 uM	24 h	2	71	0.0704	0.0714901	0	0	1	1	0	Uric acid diuretic	SLC22A12	-0.567	1.0231	-1.473
CPC012_ASC_24H:BRD-K87909389-003-01-8:10	BRD-K87909389	alvocidib	ASC	trt_cp	10 uM	24 h	2	597	0.69	0.648996	0	0	1	1	0	CDK inhibitor	CDK2|CDK4|CDK1|CDK6|CDK7|CDK9|CDK5|CDK8|EGFR|PYGM|BCL2|BIRC5|CCNT1|MCL1|XIAP	-0.567	1.0231	-1.4729
CPC006_SW480_6H:BRD-K08417745-001-02-9:88.8	BRD-K08417745	SID-26681509	SW480	trt_cp	90 uM	6 h	2	79	0.06	0.0696177	0	0	1	1	0	Cathepsin inhibitor	CTSL	-0.5669	1.0231	-1.4728
CPC017_NPC_24H:BRD-A14574269-051-01-4:10	BRD-A14574269	UB-165	NPC	trt_cp	10 uM	24 h	3	290	0.14	0.203748	0	0	1	1	0	Acetylcholine receptor agonist	CHRNA3|CHRNA4|CHRNB2	-0.5669	1.0231	-1.4727
CPC014_SKB_24H:BRD-K05804044-001-01-1:10	BRD-K05804044	AZ-628	SKB	trt_cp	10 uM	24 h	4	233	0.3	0.267343	0	0	1	1	0	RAF inhibitor	BRAF|RAF1	-0.5667	1.0231	-1.4721
EMU001_HBL1_24H:B13	BRD-K98795921	SB-2343	HBL1	trt_cp	10 uM	24 h	3	709	0.8012	0.762121	0	0	1	1	0	MTOR inhibitor|PI3K inhibitor	MTOR|PIK3CA|PIK3CB|PIK3CD|PIK3CG	-0.5666	1.0231	-1.4718
CPC005_VCAP_6H:BRD-K41564320-001-01-2:10	BRD-K41564320	purvalanol-b	VCAP	trt_cp	10 uM	6 h	4	223	0.13	0.172169	0	0	1	1	0	CDK inhibitor	CDK2|CDK4|MAPK1|MAPK3|CDK5|SRPK2	-0.5666	1.0231	-1.4718
CPC014_NPC_24H:BRD-K88551539-001-01-0:10	BRD-K88551539	CAY-10585	NPC	trt_cp	10 uM	24 h	3	111	0.1	0.106535	0	0	1	1	0	HIF modulator	HIF1A	-0.5666	1.0231	-1.4718
CPC016_HEPG2_6H:BRD-K89402695-001-01-5:10	BRD-K89402695	L-655240	HEPG2	trt_cp	10 uM	6 h	3	492	0.37	0.431434	0	0	1	1	0	Thromboxane receptor antagonist	PTGES	-0.5666	1.0231	-1.4718
CPC016_A549_6H:BRD-K56047318-001-03-0:10	BRD-K56047318	RHC-80267	A549	trt_cp	10 uM	6 h	2	109	0.23	0.160106	0	0	1	1	0	Triacylglycerol lipase inhibitor	LIPC|LIPE|LIPG|DAGLA|DAGLB	-0.5665	1.0231	-1.4717
CPC018_HT29_6H:BRD-K46556543-237-03-0:10	BRD-K46556543	potassium-canrenoate	HT29	trt_cp	10 uM	6 h	5	415	0.29	0.350795	1	0	1	1	0	Mineralocorticoid receptor antagonist	NR3C2	-0.5665	1.0231	-1.4716
CPC013_HCC515_6H:BRD-K07881437-001-01-2:10	BRD-K07881437	danusertib	HCC515	trt_cp	10 uM	6 h	3	557	0.49	0.52827	0	0	1	1	0	Aurora kinase inhibitor|FGFR inhibitor	AURKA|AURKB|AURKC|FGFR1|NTRK1|RET|BCR|SLK	-0.5665	1.0231	-1.4716
CPC014_A549_24H:BRD-K98684188-001-01-1:10	BRD-K98684188	GSK-0660	A549	trt_cp	10 uM	24 h	3	312	0.35	0.33415	0	0	1	1	0	PPAR receptor antagonist	PPARD	-0.5664	1.0231	-1.4715
CPC005_MCF7_6H:G21	BRD-K09497549	kawain	MCF7	trt_cp	10 uM	6 h	4	160	0.1904	0.176492	1	0	1	1	0	Calcium channel blocker|MTOR inhibitor|Sodium channel inhibitor	MTOR	-0.5665	1.0231	-1.4715
REP.B004_HELA_3H:L04	BRD-K24723746	solifenacin-succinate	HELA	trt_cp	0.08 uM	3 h	3	266	0.3909	0.326065	1	1	1	1	0	Acetylcholine receptor antagonist	CHRM3|CHRM1|CHRM2	-0.5664	1.0231	-1.4714
REP.A017_JURKAT_24H:N11	BRD-K67783091	haloperidol	JURKAT	trt_cp	0.125 uM	24 h	2	150	0.1299	0.14115	0	0	1	1	0	Dopamine receptor antagonist	DRD2|DRD3|HTR2A|DRD1|DRD4|CYP3A7|DRD5|GRIN2B|HRH1|HTR1A|HTR1D|HTR2B|HTR7|KCNH1	-0.5664	1.0231	-1.4713
CPC017_PHH_24H:BRD-K23478508-001-03-7:10	BRD-K23478508	digoxin	PHH	trt_cp	10 uM	24 h	3	231	0.37	0.295622	0	0	1	1	0	Na/K-ATPase inhibitor	ATP1A1|ABCB1|RORC|SLCO1B3	-0.5664	1.0231	-1.4713
LJP009_HCC515_24H:G15	BRD-K49328571	dasatinib	HCC515	trt_cp	1.11 uM	24 h	3	281	0.6441	0.43019	0	0	1	1	0	KIT inhibitor|Bcr-Abl inhibitor|Ephrin inhibitor|PDGFR inhibitor|Src inhibitor|Tyrosine kinase inhibitor	ABL1|FYN|LCK|SRC|KIT|YES1|EPHA2|LYN|PDGFRB|BCR|BTK|DDR1|DDR2|PDGFRA|ABL2|BLK|FGR|FRK|HCK|SRMS|STAT5B	-0.5663	1.0231	-1.4712
PBIOA020_PC3_24H:E19	BRD-K89464729	GSK-269962	PC3	trt_cp	10 uM	24 h	2	305	0.57	0.421617	1	1	1	1	0	Rho associated kinase inhibitor	ROCK1|ROCK2	-0.5663	1.0231	-1.4711
AICHI001_HBL1_24H:J07	BRD-K76719364	GS-9973	HBL1	trt_cp	10 uM	24 h	3	364	0.68	0.503078	0	0	1	1	0	Syk inhibitor	SYK	-0.5662	1.0231	-1.4709
CPC015_SKB_24H:BRD-K92093830-003-05-0:10	BRD-K92093830	doxorubicin	SKB	trt_cp	10 uM	24 h	2	590	0.69	0.64518	0	0	1	1	0	Topoisomerase inhibitor	TOP2A	-0.5662	1.0231	-1.4708
CPC014_SKB_24H:BRD-A60245366-001-01-1:10	BRD-A60245366	AS-601245	SKB	trt_cp	10 uM	24 h	3	503	0.74	0.616922	0	0	1	1	0	JNK inhibitor	MAPK10|MAPK8|MAPK9	-0.5662	1.0231	-1.4708
CPC013_SKB_24H:BRD-K63068307-001-01-4:10	BRD-K63068307	ZSTK-474	SKB	trt_cp	10 uM	24 h	4	434	0.52	0.480371	0	0	1	1	0	PI3K inhibitor	PIK3CG|PIK3CA|PIK3CB|PIK3CD	-0.5662	1.0231	-1.4708
EMU001_HBL1_24H:J13	BRD-K64052750	gefitinib	HBL1	trt_cp	10 uM	24 h	3	254	0.309	0.283287	0	0	1	1	0	EGFR inhibitor	EGFR|CYP2C19	-0.5662	1.0231	-1.4707
REP.A013_HT29_24H:G01	BRD-K39974922	lenvatinib	HT29	trt_cp	10 uM	24 h	3	162	0.3203	0.230339	0	0	1	1	0	FGFR inhibitor|KIT inhibitor|PDGFR inhibitor|VEGFR inhibitor	KDR|FLT4|FGFR1|FLT1|KIT|FGFR2|FGFR3|FGFR4|PDGFB|PDGFRB|RET	-0.5661	1.0231	-1.4706
PCLB003_A375_24H:BRD-K04466929-001-05-1:10	BRD-K04466929	Merck60	A375	trt_cp	10 uM	24 h	2	669	0.27	0.42976	0	0	1	1	0	HDAC inhibitor	HDAC1|HDAC2	-0.5661	1.0231	-1.4706
LJP007_CD34_24H:E12	BRD-K25340465	OSI-930	CD34	trt_cp	0.04 uM	24 h	3	118	0.2152	0.161136	1	1	1	1	0	KIT inhibitor|VEGFR inhibitor	KIT|KDR|PDGFB|PDGFRB	-0.5661	1.0231	-1.4705
REP.B007_HELA_24H:A24	BRD-K42898655	temsirolimus	HELA	trt_cp	0.01 uM	24 h	2	144	0.2482	0.191167	0	0	1	1	0	MTOR inhibitor	MTOR|PTEN	-0.5661	1.0231	-1.4705
REP.A025_MCF10A_24H:D07	BRD-K91456750	sacubitril	MCF10A	trt_cp	10 uM	24 h	3	131	0.1731	0.15227	1	1	1	1	0	Neprilysin inhibitor	MME	-0.566	1.0231	-1.4704
REP.A011_HA1E_24H:G01	BRD-K05524748	dronedarone	HA1E	trt_cp	10 uM	24 h	3	700	0.7802	0.747279	0	0	1	1	0	Adrenergic receptor antagonist	SLC22A2|SLC22A8|SLCO1B3|ADRA1A|ADRA1B|ADRA1D|ADRA2A|ADRA2B|ADRA2C|ADRB1|CACNA1C|CACNA1D|CACNA1F|CACNA1S|CACNB1|CACNB2|CACNB3|CACNB4|KCNA5|KCNH2|KCNK2|SCN1A	-0.566	1.0231	-1.4702
CPC006_NCIH2073_6H:BRD-K30677119-001-01-0:11.1	BRD-K30677119	PP-30	NCIH2073	trt_cp	12 uM	6 h	2	191	0.4	0.279497	0	0	1	1	0	RAF inhibitor	RAF1	-0.5659	1.0231	-1.4701
CPC012_NEU_24H:BRD-K51941867-001-01-8:10	BRD-K51941867	LM-1685	NEU	trt_cp	10 uM	24 h	3	256	0.2	0.228805	0	0	1	1	0	Cyclooxygenase inhibitor	PTGS2	-0.5659	1.0231	-1.47
REP.B011_MDAMB231_24H:M01	BRD-K07208025	trimethoprim	MDAMB231	trt_cp	2.22 uM	24 h	2	290	0.3192	0.307653	0	0	1	1	0	Dihydrofolate reductase inhibitor	CYP2C8|SLC22A2|DHFR|TYMS	-0.5659	1.0231	-1.47
CPC017_HT29_6H:BRD-K08252256-236-17-1:10	BRD-K08252256	diclofenac	HT29	trt_cp	10 uM	6 h	5	329	0.29	0.31234	0	0	1	1	0	Cyclooxygenase inhibitor	PTGS1|PTGS2|CYP2C8|AKR1C3|ALOX5|ASIC1|ASIC3|KCNQ2|KCNQ3|PLA2G2A|PPARG|SCN4A	-0.5658	1.0231	-1.4699
CPC006_SW480_6H:BRD-K17349619-003-01-4:10	BRD-K17349619	HLI-373	SW480	trt_cp	10 uM	6 h	2	66	0.12	0.0899898	0	0	1	1	0	MDM inhibitor	MDM2	-0.5658	1.0231	-1.4698
REP.A028_MDAMB231_24H:D03	BRD-A92826379	lupanine	MDAMB231	trt_cp	1.11 uM	24 h	3	157	0.1225	0.140232	0	0	1	1	0	Sodium channel inhibitor	INS	-0.5657	1.0231	-1.4697
CPC006_U937_6H:BRD-K32330832-001-01-0:11.1	BRD-K32330832	VER-155008	U937	trt_cp	12 uM	6 h	2	76	0.16	0.111506	1	1	1	1	0	HSP inhibitor	HSPA1A	-0.5658	1.0231	-1.4697
CPC015_MCF7_24H:BRD-A34806832-001-02-7:10	BRD-A34806832	proscillaridin	MCF7	trt_cp	10 uM	24 h	2	531	0.79	0.654925	0	0	1	1	0	Na/K-ATPase inhibitor	ATP1A1	-0.5657	1.0231	-1.4696
REP.B004_A549_24H:E20	BRD-K21450440	benzthiazide	A549	trt_cp	0.74 uM	24 h	2	138	0.2057	0.170368	0	0	1	1	0	Carbonic anhydrase inhibitor	CA2|SLC12A3|CA1|CA12|CA4|CA9	-0.5657	1.0231	-1.4696
CPC006_NCIH2073_6H:BRD-K71799949-001-20-8:96	BRD-K71799949	carbamazepine	NCIH2073	trt_cp	100 uM	6 h	2	97	0.05	0.0704209	0	0	1	1	0	Carboxamide antiepileptic	SCN1A|SCN3A|SCN5A|ABCB1|CYP1A2|CYP3A4|SCN10A|SCN11A|SCN2A|SCN4A|SCN7A|SCN8A|SCN9A	-0.5657	1.0231	-1.4695
CPC016_NPC_24H:BRD-A19661776-003-13-6:10	BRD-A19661776	mianserin	NPC	trt_cp	10 uM	24 h	4	215	0.11	0.155506	0	0	1	1	0	Serotonin receptor antagonist	HTR2A|HTR2C|ADRA1A|ADRA1B|ADRA1D|HRH1|HTR2B|HTR6|HTR7|ADRA2A|ADRA2B|ADRA2C|DRD1|DRD2|DRD3|DRD5|HRH2|HRH4|HTR1A|HTR1F|OPRK1|SLC6A2|SLC6A3|SLC6A4	-0.5657	1.0231	-1.4695
REP.B006_A375_24H:M01	BRD-K22861715	chrysin	A375	trt_cp	2.22 uM	24 h	2	145	0.25	0.192524	0	0	1	1	0	Breast cancer resistance protein inhibitor	ABCG2|AKR1B1|CDK6|CYP19A1|CYP1B1	-0.5656	1.0231	-1.4694
CPC016_NPC_24H:BRD-A35623999-001-04-0:10	BRD-A35623999	CGP-37157	NPC	trt_cp	10 uM	24 h	4	209	0.22	0.216828	0	0	1	1	0	Calcium channel blocker|Mitochondrial Na+/Ca2+ exchanger antagonist|Sodium/calcium exchange inhibitor	SLC8A1	-0.5656	1.0231	-1.4693
MOA001_U2OS_24H:P08	BRD-K82846253	repaglinide	U2OS	trt_cp	10 uM	24 h	3	97	0.24	0.154284	1	0	1	1	0	Insulin secretagogue	ABCC8|KCNJ11|CYP2C8|CYP3A5|INS|PPARG	-0.5655	1.0231	-1.4692
REP.B008_A375_24H:C01	BRD-K36740062	GSK-1070916	A375	trt_cp	2.22 uM	24 h	2	354	0.5678	0.453346	1	1	1	1	0	Aurora kinase inhibitor	AURKB|AURKC|AURKA|CYP2D6|CYP3A4	-0.5655	1.0231	-1.4692
CPC002_VCAP_24H:BRD-K17743697-066-02-8:10	BRD-K17743697	KB-R7943	VCAP	trt_cp	10 uM	24 h	2	180	0.35	0.253805	1	1	1	1	0	Sodium channel inhibitor	SLC8A1|TRPC3|TRPC5|TRPC6	-0.5655	1.0231	-1.4691
LIVB001_HUH7_72H:M14	BRD-A19795905	atovaquone	HUH7	trt_cp	10 uM	72 h	3	152	0.23	0.189067	0	0	1	1	0	Mitochondrial inhibitor	DHODH	-0.5655	1.0231	-1.4691
CPC016_NPC_24H:BRD-K69837166-003-01-2:10	BRD-K69837166	trap-101	NPC	trt_cp	10 uM	24 h	4	419	0.33	0.376006	0	0	1	1	0	Opioid receptor antagonist|Nociceptin/orphanin FQ (NOP) receptor antagonist	OPRL1	-0.5655	1.0231	-1.4689
MUC.CP002_MCF7_24H:BRD-A55424491-001-10-8:10	BRD-A55424491	methotrexate	MCF7	trt_cp	10 uM	24 h	3	337	0.38	0.361857	0	0	1	1	0	Dihydrofolate reductase inhibitor	DHFR|AOX1|FOLR1|TYMS	-0.5654	1.0231	-1.4688
CPC006_H1299_6H:BRD-K61323504-001-03-2:11.1	BRD-K61323504	SB-225002	H1299	trt_cp	12 uM	6 h	2	114	0.07	0.09033	0	0	1	1	0	CC chemokine receptor antagonist	CXCR2	-0.5653	1.023	-1.4684
REP.B008_JURKAT_24H:P12	BRD-K89402695	L-655240	JURKAT	trt_cp	0.01 uM	24 h	2	85	0.0808	0.0838003	0	0	1	1	0	Thromboxane receptor antagonist	PTGES	-0.5652	1.0229	-1.4683
CPC006_A549_6H:BRD-K66874953-004-02-1:69.83	BRD-K66874953	pifithrin-alpha	A549	trt_cp	70 uM	6 h	4	96	0.19	0.136566	1	1	1	1	0	p53 inhibitor	TP53	-0.5652	1.0227	-1.4682
CPC005_A375_6H:BRD-A55369275-003-01-2:10	BRD-A55369275	CGP-54626	A375	trt_cp	10 uM	6 h	3	113	0.2	0.152014	1	1	1	1	0	GABA receptor antagonist	GABBR1|GABBR2|KCTD12|KCTD16|KCTD8	-0.5652	1.0227	-1.4682
REP.B011_HUVEC.A_24H:D14	BRD-K04956647	nebivolol	HUVEC	trt_cp	0.74 uM	24 h	2	74	0.0894	0.0822461	0	0	1	1	0	Adrenergic receptor antagonist	ADRB1|ADRB2	-0.5652	1.0228	-1.4682
CPC006_NOMO1_6H:BRD-K41895714-001-02-2:10	BRD-K41895714	AS-605240	NOMO1	trt_cp	10 uM	6 h	2	92	0.17	0.126459	1	0	1	1	0	PI3K inhibitor	PIK3CG	-0.5651	1.0212	-1.4679
REP.A013_YAPC_24H:A13	BRD-K37385792	conivaptan	YAPC	trt_cp	10 uM	24 h	3	250	0.5231	0.365673	1	1	1	1	0	Vasopressin receptor antagonist	AVPR1A|AVPR2|OXT|OXTR	-0.5649	1.0169	-1.4675
REP.A003_YAPC_24H:P19	BRD-K36732695	setiptiline	YAPC	trt_cp	10 uM	24 h	3	279	0.3902	0.333639	0	0	1	1	0	Adrenergic receptor antagonist	HTR2A|HTR2C|HRH1	-0.5648	1.0169	-1.4672
CPC017_NPC_24H:BRD-K15791587-003-01-7:10	BRD-K15791587	L-733060	NPC	trt_cp	10 uM	24 h	4	448	0.46	0.459038	0	0	1	1	0	Tachykinin antagonist	TACR1	-0.5648	1.0169	-1.4672
PBIOA014_HA1E_24H:M01	BRD-K47983010	BX-795	HA1E	trt_cp	10 uM	24 h	3	432	0.5	0.469956	1	1	1	1	0	IKK inhibitor	PDPK1|IKBKE|TBK1|CDK2|CHEK1|GSK3B|KDR|PDK1	-0.5647	1.0169	-1.467
REP.B013_HELA_24H:I24	BRD-A41451487	PK-11195	HELA	trt_cp	0.01 uM	24 h	2	394	0.6667	0.518255	0	0	1	1	0	Benzodiazepine receptor antagonist	TSPO|NR1I2|NR1I3	-0.5647	1.0169	-1.467
LJP007_CD34_24H:O16	BRD-K53417444	OTS-167	CD34	trt_cp	0.37 uM	24 h	3	780	0.808	0.802756	0	0	1	1	0	Maternal embryonic leucine zipper kinase inhibitor	MELK	-0.5646	1.0169	-1.4668
REP.B021_MDAMB231_24H:L09	BRD-K84783599	riociguat	MDAMB231	trt_cp	0.25 uM	24 h	2	125	0.136	0.131842	0	0	1	1	0	Guanylate cyclase activator	GUCY1A3|GUCY1B3|GUCY1A2|GUCY1B2	-0.5646	1.0169	-1.4668
CPC004_HCC515_24H:BRD-K20742498-003-01-1:10	BRD-K20742498	RS-39604	HCC515	trt_cp	10 uM	24 h	3	278	0.41	0.341385	1	1	1	1	0	Serotonin receptor antagonist	HTR4	-0.5647	1.0169	-1.4668
CPC006_U937_6H:BRD-K51575138-001-01-7:10	BRD-K51575138	TPCA-1	U937	trt_cp	10 uM	6 h	2	239	0.13	0.178238	1	0	1	1	0	IKK inhibitor	IKBKB	-0.5646	1.0169	-1.4667
CPC017_NPC_24H:BRD-K91509126-001-04-6:10	BRD-K91509126	piceatannol	NPC	trt_cp	10 uM	24 h	4	537	0.64	0.592799	0	0	1	1	0	Syk inhibitor	PTGS2|SIRT1|SYK|TYR|ATP5A1|ATP5B|ATP5C1|IRF3	-0.5645	1.0169	-1.4665
REP.A023_A375_24H:C04	BRD-K68232650	lacosamide	A375	trt_cp	0.37 uM	24 h	3	148	0.2702	0.202211	1	1	1	1	0	Collapsin response mediator protein stimulant|Sodium channel blocker	SCN3A|SCN9A|SCN1A|SCN10A|CYP2C19|DPYSL2|SCN11A|SCN2A|SCN4A|SCN5A|SCN7A|SCN8A	-0.5645	1.0169	-1.4664
CPC005_MCF7_6H:O11	BRD-K09778810	FGIN-1-27	MCF7	trt_cp	10 uM	6 h	4	140	0.2151	0.175475	1	0	1	1	0	Inositol monophosphatase inhibitor	TSPO	-0.5645	1.0169	-1.4664
REP.B019_HA1E_24H:L20	BRD-A49399758	desmopressin-acetate	HA1E	trt_cp	0.74 uM	24 h	2	71	0.1992	0.120255	1	1	1	1	0	Vasopressin receptor agonist	AVPR2|AVPR1A|AVPR1B|OXTR	-0.5645	1.0169	-1.4664
REP.A003_PC3_24H:P13	BRD-K36627727	tamibarotene	PC3	trt_cp	10 uM	24 h	3	103	0.154	0.127353	1	1	1	1	0	Retinoid receptor agonist	RARA|RARB	-0.5645	1.0169	-1.4663
CPC004_HT29_6H:BRD-K35941380-050-17-0:10	BRD-K35941380	methysergide	HT29	trt_cp	10 uM	6 h	5	260	0.37	0.31363	0	0	1	1	0	Serotonin receptor antagonist	HTR2C|HTR1B|HTR1E|HTR1F|HTR2A|HTR2B|HTR7|HTR1A|HTR1D|HTR5A|HTR6	-0.5644	1.0169	-1.4661
CPC011_HT29_6H:BRD-K40901640-311-04-7:10	BRD-K40901640	cinanserin	HT29	trt_cp	10 uM	6 h	4	469	0.16	0.276998	0	0	1	1	0	Serotonin receptor antagonist	HTR2A	-0.5644	1.0169	-1.4661
REP.A012_JURKAT_24H:A15	BRD-K00152668	adarotene	JURKAT	trt_cp	1.11 uM	24 h	2	471	0.5673	0.522694	0	0	1	1	0	Retinoid receptor agonist	RARG|RARA|RARB	-0.5643	1.0169	-1.466
CPC017_ASC_24H:BRD-A43974499-066-01-1:10	BRD-A43974499	reboxetine	ASC	trt_cp	10 uM	24 h	4	94	0.06	0.0759399	1	0	1	1	0	Adrenergic receptor antagonist	SLC6A2	-0.5643	1.0169	-1.4659
CPC006_PC3_24H:C03	BRD-K69840642	ISOX	PC3	trt_cp	10 uM	24 h	5	683	0.8359	0.764044	1	1	1	1	0	HDAC inhibitor	HDAC6	-0.5643	1.0169	-1.4659
MOAR006_PC3_24H:E14	BRD-K97072811	TG-003	PC3	trt_cp	3.33 uM	24 h	3	88	0.1	0.0948576	1	0	1	1	0	CLK inhibitor	CLK1|CLK4|DYRK1A|DYRK1B	-0.5643	1.0169	-1.4659
REP.A015_HELA_24H:K01	BRD-K59273480	propentofylline	HELA	trt_cp	10 uM	24 h	3	298	0.5317	0.402506	1	1	1	1	0	Adenosine receptor antagonist|Phosphodiesterase inhibitor	ACHE|PDE1A	-0.5643	1.0169	-1.4658
CPC014_A549_6H:BRD-K70549064-001-03-3:10	BRD-K70549064	staurosporine	A549	trt_cp	10 uM	6 h	3	579	0.7	0.643752	0	0	1	1	0	PKC inhibitor	CDK2|GSK3B	-0.5643	1.0169	-1.4658
CPC004_VCAP_24H:J19	BRD-A00546892	biperiden	VCAP	trt_cp	10 uM	24 h	5	318	0.17	0.235109	0	0	1	1	0	Acetylcholine receptor antagonist	CHRM1|CHRM2|CHRM3|CHRM4|CHRM5|CHRNA2	-0.5642	1.0169	-1.4656
ABY001_NCIH2073_XH:BRD-K66175015:10:24	BRD-K66175015	afatinib	NCIH2073	trt_cp	10 uM	24 h	3	319	0.59	0.438684	1	1	1	1	0	EGFR inhibitor	EGFR|ERBB2|ERBB4	-0.5642	1.0169	-1.4656
REP.A022_YAPC_24H:N07	BRD-K71035033	masitinib	YAPC	trt_cp	10 uM	24 h	3	181	0.475	0.296495	1	1	1	1	0	KIT inhibitor|PDGFR inhibitor|Src inhibitor	KIT|FGFR3|LYN|PDGFRB|PDGFRA	-0.5641	1.0169	-1.4654
REP.A013_PC3_24H:B09	BRD-K37355418	efaproxiral	PC3	trt_cp	1.11 uM	24 h	2	80	0.1709	0.118235	0	0	1	1	0	Haemoglobin oxygen release stimulant	HBA1|HBB	-0.564	1.0169	-1.4651
REP.A009_HELA_24H:C01	BRD-K28428262	brivanib	HELA	trt_cp	10 uM	24 h	3	277	0.463	0.362127	0	0	1	1	0	FGFR inhibitor|VEGFR inhibitor	FGFR1|KDR|FLT1|FGFR2|FGFR3|FLT4|CYP3A4|KCNH2	-0.564	1.0169	-1.4651
REP.B022_HA1E_24H:J09	BRD-K72215350	acexamic-acid	HA1E	trt_cp	0.25 uM	24 h	2	53	0.1666	0.095018	1	0	1	1	0	Gastrin inhibitor|5-alpha reductase inhibitor|Reducing agent	GAST|SRD5A1	-0.5639	1.0169	-1.465
PAC004_U2OS_6H:BRD-K10995081-001-05-5:4.95088	BRD-K10995081	perphenazine	U2OS	trt_cp	4 uM	6 h	2	187	0.37	0.265982	1	1	1	1	0	Dopamine receptor antagonist	DRD2|CALM1|DRD1|HRH1|HTR2A|HTR2C|HTR6|HTR7	-0.564	1.0169	-1.465
REP.B009_HELA_24H:E02	BRD-A29485665	bicalutamide	HELA	trt_cp	0.74 uM	24 h	2	70	0.2091	0.122337	1	0	1	1	0	Androgen receptor antagonist	AR|CYP2C19	-0.564	1.0169	-1.465
REP.B024_MCF10A_24H:K15	BRD-K78010432	furosemide	MCF10A	trt_cp	0.25 uM	24 h	2	317	0.2699	0.295775	0	0	1	1	0	Diuretic	SLC12A1|SLC12A2|CA2|GPR35	-0.5636	1.013	-1.4642
CPC013_A375_6H:BRD-K25504083-001-03-1:10	BRD-K25504083	cytochalasin-d	A375	trt_cp	10 uM	6 h	3	186	0.49	0.305271	1	1	1	1	0	Tubulin inhibitor	ACTA1	-0.5636	1.013	-1.4642
CPC006_NOMO1_6H:BRD-K68065987-300-03-4:10	BRD-K68065987	MK-2206	NOMO1	trt_cp	10 uM	6 h	2	338	0.04	0.117576	0	0	1	1	0	AKT inhibitor	AKT1|AKT2|AKT3	-0.5636	1.013	-1.4642
REP.A012_HA1E_24H:B12	BRD-A00147595	balaglitazone	HA1E	trt_cp	0.04 uM	24 h	2	112	0.2142	0.156621	1	1	1	1	0	Insulin sensitizer|PPAR receptor agonist	PPARG|INS	-0.5635	1.013	-1.4639
CPC006_HCT116_6H:BRD-K47983010-001-02-1:10	BRD-K47983010	BX-795	HCT116	trt_cp	10 uM	6 h	2	94	0.35	0.183412	1	1	1	1	0	IKK inhibitor	PDPK1|IKBKE|TBK1|CDK2|CHEK1|GSK3B|KDR|PDK1	-0.5635	1.013	-1.4637
CPC006_NOMO1_6H:BRD-A43331270-001-01-6:10	BRD-A43331270	niguldipine	NOMO1	trt_cp	10 uM	6 h	2	617	0.67	0.650145	0	0	1	1	0	Adrenergic receptor antagonist|Calcium channel blocker	ADRA1A|CACNA1C	-0.5634	1.013	-1.4636
CPC003_HA1E_24H:BRD-K32584078-001-02-3:10	BRD-K32584078	BML-257	HA1E	trt_cp	10 uM	24 h	3	211	0.2	0.207724	1	0	1	1	0	AKT inhibitor|HCV inhibitor	AKT1	-0.5634	1.013	-1.4636
ASG003_A549_48H:P22	BRD-K71035033	masitinib	A549	trt_cp	10 uM	48 h	5	310	0.5107	0.402341	1	1	1	1	0	KIT inhibitor|PDGFR inhibitor|Src inhibitor	KIT|FGFR3|LYN|PDGFRB|PDGFRA	-0.5633	1.0128	-1.4634
ABY001_NCIH508_XH:BRD-K74514084:10:24	BRD-K74514084	pazopanib	NCIH508	trt_cp	10 uM	24 h	3	146	0.37	0.235022	1	1	1	1	0	VEGFR inhibitor|KIT inhibitor|PDGFR inhibitor	KDR|KIT|FLT1|FLT4|PDGFRB|PDGFRA|BRAF|CYP2B6|CYP2C8|CYP2E1|DDR2|CSF1R|FGF1|FGFR1|FGFR3|ITK|SH2B3	-0.5633	1.0128	-1.4634
CPC017_NPC_24H:BRD-K13646352-001-01-2:10	BRD-K13646352	midostaurin	NPC	trt_cp	10 uM	24 h	4	546	0.65	0.602398	0	0	1	1	0	FLT3 inhibitor|KIT inhibitor|PKC inhibitor	FLT3|KIT|CCNB1|FLT1|KDR|PDGFRB|PRKCA|VEGFA|PRKCG	-0.5632	1.0114	-1.4632
CPC005_HA1E_24H:BRD-K40901640-001-01-0:10	BRD-K40901640	cinanserin	HA1E	trt_cp	10 uM	24 h	3	200	0.25	0.226108	1	0	1	1	0	Serotonin receptor antagonist	HTR2A	-0.5632	1.0116	-1.4632
REP.B025_A549_24H:L03	BRD-K76617868	fasudil	A549	trt_cp	0.25 uM	24 h	2	473	0.2993	0.380465	0	0	1	1	0	Rho associated kinase inhibitor	ROCK1|ROCK2|PKIA|PRKACA	-0.5632	1.0101	-1.4631
LJP008_HA1E_24H:H02	BRD-K21906513	UNC-669	HA1E	trt_cp	3.33 uM	24 h	2	64	0.0724	0.0688319	1	0	1	1	0	L3MBTL antagonist	L3MBTL1|L3MBTL3	-0.5631	1.0058	-1.4629
CPC017_A549_6H:BRD-K05181084-003-02-9:10	BRD-K05181084	NGB-2904	A549	trt_cp	10 uM	6 h	3	101	0.19	0.140077	1	0	1	1	0	Dopamine receptor antagonist	DRD3	-0.5632	1.006	-1.4629
REP.A016_PC3_24H:K01	BRD-K54770957	etoricoxib	PC3	trt_cp	10 uM	24 h	3	428	0.5036	0.469456	1	1	1	1	0	Cyclooxygenase inhibitor	PTGS2	-0.5631	1.0042	-1.4628
CPC018_HT29_6H:BRD-K87158025-003-01-2:10	BRD-K87158025	benzamil	HT29	trt_cp	10 uM	6 h	5	125	0.22	0.167686	1	0	1	1	0	Sodium channel inhibitor	PKD2L1|SCNN1A|SCNN1B|SCNN1G|ASIC1|SCNN1D|SLC8A1	-0.563	1.0024	-1.4626
REP.A021_HELA_24H:P13	BRD-K86816506	PF-04457845	HELA	trt_cp	10 uM	24 h	3	145	0.3235	0.219004	1	1	1	1	0	FAAH inhibitor	FAAH	-0.563	1.0024	-1.4626
CPC017_NPC_24H:BRD-K04546108-066-01-5:10	BRD-K04546108	BRD-K04546108	NPC	trt_cp	10 uM	24 h	4	420	0.61	0.511823	0	0	1	1	0	JAK inhibitor	JAK3	-0.563	1.0024	-1.4626
CPC014_SKB_24H:BRD-K58772419-001-02-1:10	BRD-K58772419	AZD-6482	SKB	trt_cp	10 uM	24 h	3	108	0.46	0.225383	0	0	1	1	0	PI3K inhibitor	PIK3CB|PIK3CD|PIK3CG|PIK3CA	-0.563	1.0024	-1.4625
PAC002_U2OS_6H:BRD-K50214219-001-02-4:23.5622	BRD-K50214219	CS-1657	U2OS	trt_cp	25 uM	6 h	2	176	0.25	0.212108	0	0	1	1	0	PARP inhibitor	PARP1	-0.563	1.0024	-1.4625
REP.A028_HELA_24H:O07	BRD-K97428065	netupitant	HELA	trt_cp	10 uM	24 h	3	337	0.554	0.436918	1	1	1	1	0	Tachykinin antagonist	TACR1	-0.563	1.0024	-1.4624
CPC011_A375_6H:BRD-K88304388-045-14-6:10	BRD-K88304388	dextrorphan	A375	trt_cp	10 uM	6 h	3	620	0.29	0.428771	1	0	1	1	0	Glutamate receptor antagonist	OPRM1|OPRK1|OPRD1	-0.5629	1.0024	-1.4623
REP.A026_HT29_24H:M19	BRD-K99792991	hexachlorophene	HT29	trt_cp	10 uM	24 h	3	583	0.5304	0.562298	0	0	1	1	0	Potassium channel activator	ENPP2|GLUD1|SDHD	-0.5629	1.0024	-1.4623
REP.B020_HA1E_24H:E08	BRD-K85833139	dehydroepiandrosterone	HA1E	trt_cp	0.74 uM	24 h	2	53	0.0871	0.0687033	1	0	1	1	0	Protein synthesis stimulant	AR|CYP3A5|ESR1|ESR2|G6PD|GABRA1|GABRA2|GABRA3|GABRA4|GABRA5|GABRA6|GABRB1|GABRB2|GABRB3|GABRD|GABRE|GABRG1|GABRG2|GABRG3|GABRP|GABRQ|GRIN1|GRIN2A|GRIN2B|GRIN2C|GRIN2D|GRIN3A|GRIN3B|HSD17B1|NR1I2|NR1I3|PPARA|SIGMAR1|SULT2A1|SULT2B1	-0.5629	1.0024	-1.4622
CPC016_A549_24H:BRD-K72783841-001-01-0:10	BRD-K72783841	BRD-K72783841	A549	trt_cp	10 uM	24 h	3	64	0.18	0.108532	0	0	1	1	0	EGFR inhibitor	EGFR	-0.5629	1.0024	-1.4622
CPC018_PHH_24H:BRD-A14798026-001-01-8:10	BRD-A14798026	mestranol	PHH	trt_cp	10 uM	24 h	3	269	0.45	0.351814	0	0	1	1	0	Estrogen receptor agonist	ESR1	-0.5628	1.0023	-1.4621
CPC017_SKB_24H:BRD-K27737647-300-01-4:10	BRD-K27737647	H-89	SKB	trt_cp	10 uM	24 h	2	81	0.24	0.140987	0	0	1	1	0	PKA inhibitor	PRKACA|KCNA2|KCNA3|KCNA5|KCNAB2|KCNC1|KCNC2|KCNC3|KCNE1|KCNE2|KCNE3|KCNE4|KCNH1|KCNH2|KCNQ1|KCNQ2|KCNQ3|KCNQ5|KCNS3|GSG2|PKIA	-0.5628	1.0023	-1.4621
REP.A022_HEK293_24H:L06	BRD-K73237276	tacalcitol	HEK293	trt_cp	0.04 uM	24 h	3	117	0.1166	0.118106	0	0	1	1	0	Vitamin D receptor agonist	VDR	-0.5628	1.0023	-1.4621
CPC016_A549_24H:BRD-K87990216-001-03-7:10	BRD-K87990216	piretanide	A549	trt_cp	10 uM	24 h	3	122	0.13	0.127345	0	0	1	1	0	Glucocorticoid receptor agonist	SLC12A1|SLC12A2	-0.5628	1.0021	-1.462
MUC.CP008_HA1E_24H:F07	BRD-K28731095	calcitriol	HA1E	trt_cp	10 uM	24 h	3	137	0.23	0.179496	1	1	1	1	0	Vitamin D receptor agonist	VDR|CYP3A5	-0.5628	1.0022	-1.462
LPROT005_A549_6H:BRD-K01567962:25	BRD-K01567962	pyrazolanthrone	A549	trt_cp	25 uM	6 h	3	171	0.38	0.257763	0	0	1	1	0	JNK inhibitor	MAPK10|MAPK8|MAPK9|TTK|LRRK2|MAPK8IP1	-0.5628	1.0022	-1.462
[truncated: 36,518 more rows]
